# Supplementary material for: Predicting transfer RNA gene activity from sequence and genome context
Source: HighWire-hosted journal article supplement (doi:10.1101/gr.256164.119), 2019-12-19
Supplement: Supplemental_Table_S2_.xlsx [file Supplemental_Table_S2_.xlsx]

## Sheet: S2
Supplemental Table S2: All training, testing and validation data used in this study for comparison to predictions, along with their sources and brief descriptions.
Brief Description of Data	Usage in Present Study	Assay	Training/Testing/Validation	Species	Sources
Epigenomic data for presence of histone marks, including H3K4me3, H3K4me1, H3K36me3, H3K27me3, H3K9me3, across 127 cell lines and tissues	Creating 'active' and 'inactive' labels for each human tRNA gene to be used for training the classifier	ChIP	Training	human	Roadmap Epigenomics Consortium et al. 2015, Holmes 2018, Thornlow et al. 2019
Analogous data to above for mouse genome across 9 tissues	Creating 'active' and 'inactive' labels for each mouse tRNA gene to be used for testing the classifier	ChIP	Testing	mouse	Bogu et al. 2016, Holmes 2018
Pol III ChIP-seq data for the liver of mouse, macaque, dog, and rat, and for muscle and testis from mouse	Independent validation of classifier predictions in mouse, dog, rat and macaque	Pol III ChIP-seq	Validation	mouse, dog, rat, macaque	Kutter et al. 2011
ATAC-seq data captured in liver, CD4 and CD8 cells for the cow, pig and goat genomes	Independent validiation of classifier predictions in cow, goat, pig	ATAC-seq	Validation	cow, goat, pig	Foissac et al. 2019
DM-tRNA-seq data captured in mouse liver and brain, collected by our lab	Independent validation of mouse tRNA gene classifications, controls for possible artifacts in Pol III ChIP-seq data	DM-tRNA-seq	Validation	mouse	Previously unpublished
