# Supplementary material for: Predicting transfer RNA gene activity from sequence and genome context
Source: HighWire-hosted journal article supplement (doi:10.1101/gr.256164.119), 2019-12-19
Supplement: Supplemental_Table_S3_.xlsx [file Supplemental_Table_S3_.xlsx]

## Sheet: S3
Supplemental Table S3: Our training set of 366 human tRNA genes are shown with their genomic locations, feature data, predictions after ten-fold cross-validation, probability scores for each prediction, and activity labels based on epigenomic data (Roadmap Epigenomics Consortium et al. 2015; Thornlow et al. 2018).
species	tRNA	chr	start	end	strand	Total Number of tRNA Genes With Identical Anticodon	Minimum Free Energy of Canonical tRNA Secondary Structure	tRNAscan-SE General Bit Score	Average PhyloP Score in tRNA Gene Sequence	Distance To Nearest TTTT Transcription Termination Sequence	CpG Density Across tRNA Locus	Observed/Expected CpG Islands Score Upstream of tRNA Gene	Average PhyloP Score in 5' Flanking Region	tRNA Genes Within 10 Kilobases	Exons Within 75 Kilobases	Prediction	Probability	Experimental Data	HGNC Name
Homo_sapiens	tRNA-Ala-AGC-1-1	chr6	28795963	28796035	-	26	-28.9	84.9	-0.17012500000000003	7	0.02849740932642487	0.5003248862897985	-2.0199	3	3	active	0.839327841396	active	TRA-AGC1-1
Homo_sapiens	tRNA-Ala-AGC-2-1	chr6	28838443	28838515	-	26	-31.9	84.7	1.0051666666666668	4	0.034974093264248704	0.6722151088348272	-4.2416	0	9	active	0.97648766255	active	TRA-AGC2-1
Homo_sapiens	tRNA-Ala-AGC-2-2	chr6	28863684	28863756	-	26	-31.9	84.7	1.0734305555555566	6	0.042746113989637305	0.9496124031007752	-2.99725	0	12	active	0.981617905827	active	TRA-AGC2-2
Homo_sapiens	tRNA-Ala-AGC-3-1	chr6	28607155	28607227	+	26	-29.9	80.3	0.819513888888889	4	0.02461139896373057	0.4685408299866131	-1.8854000000000006	1	21	active	0.960267513648	active	TRA-AGC3-1
Homo_sapiens	tRNA-Ala-AGC-4-1	chr6	28658236	28658308	-	26	-23.6	76.1	0.8048611111111109	3	0.029792746113989636	0.5494505494505495	-3.6069999999999984	1	13	active	0.961605451857	active	TRA-AGC4-1
Homo_sapiens	tRNA-Ala-AGC-5-1	chr6	28710588	28710660	+	26	-30.4	84.2	0.43380555555555556	107	0.023316062176165803	0.41477384949634605	-3.48155	1	8	active	0.808081850745	active	TRA-AGC5-1
Homo_sapiens	tRNA-Ala-AGC-6-1	chr6	28812071	28812143	-	26	-27.8	74.1	-0.17470833333333335	2	0.01683937823834197	0.2125506072874494	-2.2171	3	2	active	0.553192559023	inactive	TRA-AGC6-1
Homo_sapiens	tRNA-Ala-AGC-7-1	chr6	28719703	28719775	+	26	-31.9	84.7	-0.14180555555555552	67	0.018134715025906734	0.0	-1.386	3	7	inactive	-0.572062022456	active	TRA-AGC7-1
Homo_sapiens	tRNA-Ala-AGC-8-1	chr2	27051213	27051286	+	26	-32.0	59.7	1.6343424657534247	6	0.059508408796895215	0.6433823529411765	-2.3705499999999997	1	86	active	0.972089367496	active	TRA-AGC8-1
Homo_sapiens	tRNA-Ala-AGC-8-2	chr8	66114188	66114261	+	26	-32.0	59.7	1.679986301369863	1	0.047865459249676584	0.7983056370153144	-1.1595999999999997	2	30	active	0.96279716996	active	TRA-AGC8-2
Homo_sapiens	tRNA-Ala-AGC-11-1	chr6	26571863	26571936	-	26	-29.6	58.9	1.1163287671232882	1	0.03363518758085381	0.6463068181818182	-1.9251	3	24	active	0.920221143829	active	TRA-AGC11-1
Homo_sapiens	tRNA-Ala-AGC-12-3	chr6	57856400	57856473	-	26	-26.3	60.0	0.02835616438356164	220	0.015523932729624839	0.3967611336032389	-1.2696	0	21	inactive	-0.547843701789	inactive	TRA-AGC12-3
Homo_sapiens	tRNA-Ala-AGC-13-2	chr6	57838349	57838422	-	26	-26.3	58.7	0.0005205479452054719	220	0.014230271668822769	0.23769100169779286	-1.2850000000000001	1	16	inactive	-0.794246193193	inactive	TRA-AGC13-2
Homo_sapiens	tRNA-Ala-AGC-15-1	chr14	88979097	88979170	+	26	-27.7	56.7	0.079972602739726	59	0.019404915912031046	0.46880979716800614	-0.5296500000000001	0	2	active	0.519607205053	active	TRA-AGC15-1
Homo_sapiens	tRNA-Ala-AGC-16-1	chr6	57870344	57870417	-	26	-21.5	53.1	-0.07965753424657532	207	0.01164294954721863	0.3121098626716604	-1.7035	0	22	inactive	-0.790155319242	inactive	TRA-AGC16-1
Homo_sapiens	tRNA-Ala-CGC-1-1	chr6	26553502	26553574	+	4	-26.5	79.7	1.463166666666665	5	0.02072538860103627	0.5412371134020618	-3.8420499999999995	3	27	active	0.968265319689	active	TRA-CGC1-1
Homo_sapiens	tRNA-Ala-CGC-2-1	chr6	28673835	28673907	-	4	-26.5	79.7	1.107875	15	0.025906735751295335	0.684931506849315	-2.5749000000000004	0	9	active	0.98026084388	active	TRA-CGC2-1
Homo_sapiens	tRNA-Ala-CGC-3-1	chr2	156400768	156400840	+	4	-27.6	74.4	1.6131125000000004	17	0.04404145077720207	0.7097697721579387	-2.4675499999999997	1	17	active	0.98795480178	active	TRA-CGC3-1
Homo_sapiens	tRNA-Ala-CGC-4-1	chr6	28729314	28729386	+	4	-25.7	76.1	0.18905555555555556	8	0.019430051813471502	0.37537537537537535	-5.070749999999999	3	2	active	0.734815738825	active	TRA-CGC4-1
Homo_sapiens	tRNA-Ala-TGC-1-1	chr6	28789769	28789841	-	8	-28.5	80.5	0.5990277777777776	9	0.031088082901554404	0.7028112449799196	-2.0472	2	3	active	0.966088548649	active	TRA-TGC1-1
Homo_sapiens	tRNA-Ala-TGC-2-1	chr6	28643444	28643516	+	8	-26.5	79.7	0.14366666666666664	13	0.012953367875647668	0.0992063492063492	-2.5679	1	16	inactive	-0.718086365988	active	TRA-TGC2-1
Homo_sapiens	tRNA-Ala-TGC-3-1	chr5	181206867	181206939	+	8	-26.5	79.7	1.4072916666666682	6	0.04145077720207254	0.5975609756097561	-3.5274499999999995	1	49	active	0.991747536559	active	TRA-TGC3-1
Homo_sapiens	tRNA-Ala-TGC-3-2	chr12	124921754	124921826	-	8	-26.5	79.7	1.3765972222222227	6	0.018134715025906734	0.4227053140096618	-2.7547500000000005	2	45	active	0.923312168551	active	TRA-TGC3-2
Homo_sapiens	tRNA-Ala-TGC-4-1	chr12	124939965	124940037	+	8	-25.8	78.8	0.7898888888888881	3	0.04792746113989637	0.7476350320415014	-3.264099999999999	1	45	active	0.989506582682	active	TRA-TGC4-1
Homo_sapiens	tRNA-Ala-TGC-5-1	chr6	28817234	28817306	-	8	-27.1	75.3	0.5922638888888887	8	0.031088082901554404	0.5104166666666666	-2.1719	3	2	active	0.982251838551	active	TRA-TGC5-1
Homo_sapiens	tRNA-Ala-TGC-6-1	chr6	28758363	28758435	-	8	-27.4	74.2	0.5774027777777776	8	0.025906735751295335	0.5306476066709985	-2.320849999999999	1	1	active	0.967787659756	active	TRA-TGC6-1
Homo_sapiens	tRNA-Ala-TGC-7-1	chr6	28802799	28802870	-	8	-20.0	60.0	0.6089999999999998	53	0.02594033722438392	0.4683318465655665	-2.4346999999999994	3	3	active	0.778485233388	active	TRA-TGC7-1
Homo_sapiens	tRNA-Arg-ACG-1-1	chr6	26328139	26328212	+	7	-25.4	67.6	0.9675616438356162	62	0.02328589909443726	0.6924816280384398	-4.0938	5	40	active	0.951159594562	active	TRR-ACG1-1
Homo_sapiens	tRNA-Arg-ACG-1-2	chr6	26537497	26537570	+	7	-25.4	67.6	1.2603150684931512	15	0.050452781371280724	0.851384223329086	-2.5555999999999996	2	35	active	0.988437317613	active	TRR-ACG1-2
Homo_sapiens	tRNA-Arg-ACG-1-3	chr14	22929700	22929773	+	7	-25.4	67.6	1.6219999999999999	32	0.04398447606727038	0.7769145394006659	-3.0639499999999997	0	92	active	0.984939597448	active	TRR-ACG1-3
Homo_sapiens	tRNA-Arg-ACG-2-1	chr3	45688998	45689071	-	7	-23.1	64.2	1.5422465753424657	9	0.0646830530401035	1.048234552332913	-3.1050499999999994	0	35	active	0.984601371449	active	TRR-ACG2-1
Homo_sapiens	tRNA-Arg-ACG-2-2	chr6	27213843	27213916	-	7	-23.1	64.2	0.7650958904109588	8	0.047865459249676584	0.8718297101449275	-3.7173499999999997	3	18	active	0.985672459897	active	TRR-ACG2-2
Homo_sapiens	tRNA-Arg-ACG-2-3	chr6	27215172	27215245	+	7	-23.1	64.2	0.11547945205479447	15	0.047865459249676584	0.831447963800905	-0.24155000000000007	3	17	active	0.902051147614	active	TRR-ACG2-3
Homo_sapiens	tRNA-Arg-ACG-2-4	chr6	27670564	27670637	-	7	-23.1	64.2	0.7194246575342466	13	0.018111254851228976	0.11371020142949967	-2.9825500000000003	2	7	active	0.572016080447	active	TRR-ACG2-4
Homo_sapiens	tRNA-Arg-CCG-1-1	chr6	28742951	28743024	-	4	-27.1	67.0	0.5723424657534245	238	0.028460543337645538	0.651890482398957	-1.88095	2	1	active	0.843044644763	active	TRR-CCG1-1
Homo_sapiens	tRNA-Arg-CCG-1-2	chr6	28881387	28881460	+	4	-27.1	67.0	0.4200410958904108	3	0.027166882276843468	0.40160642570281124	-1.6891499999999997	0	13	active	0.931601244347	active	TRR-CCG1-2
Homo_sapiens	tRNA-Arg-CCG-1-3	chr16	3150673	3150746	+	4	-27.1	67.0	1.391821917808219	14	0.07632600258732213	0.7315315315315315	-5.10325	3	54	active	0.977241939669	active	TRR-CCG1-3
Homo_sapiens	tRNA-Arg-CCG-2-1	chr17	68019896	68019969	-	4	-29.0	64.9	1.6312624999999996	11	0.06597671410090557	0.9744431753283838	0.1269	0	25	active	0.94224064634	active	TRR-CCG2-1
Homo_sapiens	tRNA-Arg-CCT-1-1	chr17	75033905	75033978	+	5	-32.1	72.3	1.3549178082191788	14	0.05304010349288486	0.6372062231049321	-3.14295	2	50	active	0.988301457027	active	TRR-CCT1-1
Homo_sapiens	tRNA-Arg-CCT-2-1	chr17	75034430	75034503	-	5	-32.1	71.1	0.8587397260273973	28	0.06080206985769728	0.8018983716553474	-2.9562999999999997	2	49	active	0.983535396238	active	TRR-CCT2-1
Homo_sapiens	tRNA-Arg-CCT-3-1	chr16	3152899	3152972	+	5	-30.6	71.7	0.9573561643835621	13	0.042690815006468305	0.7769556025369979	-2.7202000000000006	3	54	active	0.987435973221	active	TRR-CCT3-1
Homo_sapiens	tRNA-Arg-CCT-4-1	chr7	139340699	139340772	+	5	-27.2	65.6	1.6730131578947363	9	0.06985769728331177	1.371473354231975	-1.3480500000000002	0	28	active	0.97359189627	active	TRR-CCT4-1
Homo_sapiens	tRNA-Arg-CCT-5-1	chr16	3193917	3193990	+	5	-29.0	54.7	0.8237534246575342	43	0.02457956015523933	0.6367771280051981	-1.9999000000000002	5	54	active	0.907433291283	inactive	TRR-CCT5-1
Homo_sapiens	tRNA-Arg-TCG-1-1	chr15	89335072	89335145	+	6	-29.2	74.8	1.6157260273972616	19	0.08408796895213454	0.9130434782608695	-2.8031500000000005	0	78	active	0.98446828878	active	TRR-TCG1-1
Homo_sapiens	tRNA-Arg-TCG-2-1	chr6	26322817	26322890	+	6	-25.9	70.3	0.7483150684931507	27	0.03492884864165589	0.8558688147295742	-3.12785	6	41	active	0.990261441348	active	TRR-TCG2-1
Homo_sapiens	tRNA-Arg-TCG-3-1	chr17	75035112	75035185	+	6	-25.9	68.8	0.21605479452054788	5	0.062095730918499355	0.7385264638649551	-1.5407500000000003	2	49	active	0.978046752832	active	TRR-TCG3-1
Homo_sapiens	tRNA-Arg-TCG-4-1	chr6	26299676	26299749	+	6	-23.7	66.8	1.1330273972602745	11	0.029754204398447608	0.8484848484848485	-5.44675	1	29	active	0.989104198804	active	TRR-TCG4-1
Homo_sapiens	tRNA-Arg-TCG-5-1	chr6	28543113	28543186	-	6	-23.7	65.5	0.9975205479452052	8	0.019404915912031046	0.10432190760059612	-2.7946	1	22	active	0.591616368744	active	TRR-TCG5-1
Homo_sapiens	tRNA-Arg-TCG-6-1	chr9	110198522	110198595	+	6	-21.0	53.7	-0.06691780821917812	13	0.02199223803363519	0.08800603469952226	-0.6218000000000001	0	16	inactive	-0.789990099828	inactive	TRR-TCG6-1
Homo_sapiens	tRNA-Arg-TCT-1-1	chr1	93847572	93847657	+	6	-30.7	71.1	1.639104651162791	6	0.09426751592356689	0.9523809523809523	0.3703000000000001	0	22	active	0.979432271546	active	TRR-TCT1-1
Homo_sapiens	tRNA-Arg-TCT-2-1	chr17	8120924	8121012	+	6	-28.1	70.8	1.5622876712328768	1	0.046954314720812185	0.7596899224806202	-0.27829999999999994	4	95	active	0.952758497747	active	TRR-TCT2-1
Homo_sapiens	tRNA-Arg-TCT-3-1	chr9	128340075	128340166	-	6	-28.1	70.1	0.30105479452054795	2	0.06447534766118837	0.8338557993730408	-2.39715	0	67	active	0.987944434473	active	TRR-TCT3-1
Homo_sapiens	tRNA-Arg-TCT-3-2	chr11	59551293	59551379	+	6	-27.9	70.3	1.218904109589041	1	0.04071246819338423	0.8966244725738397	-2.5225500000000003	6	35	active	0.990650908618	active	TRR-TCT3-2
Homo_sapiens	tRNA-Arg-TCT-4-1	chr1	159141610	159141684	-	6	-27.7	78.5	1.6292972972972986	19	0.01937984496124031	0.2606105733432614	1.5576	0	24	active	0.56044303021	active	TRR-TCT4-1
Homo_sapiens	tRNA-Arg-TCT-5-1	chr6	27562183	27562270	+	6	-23.1	61.4	0.2983424657534247	9	0.0241423125794155	0.6659056316590564	-2.51715	1	4	active	0.910083041227	active	TRR-TCT5-1
Homo_sapiens	tRNA-Asn-GTT-1-1	chr1	161540240	161540314	+	24	-26.4	81.5	1.2704594594594594	9	0.050387596899224806	0.6862745098039216	-4.27025	2	29	active	0.99412519614	active	TRN-GTT1-1
Homo_sapiens	tRNA-Asn-GTT-2-1	chr1	148529256	148529330	+	24	-26.4	80.9	0.11120270270270269	11	0.059431524547803614	0.7825148407987048	-1.4593	0	74	active	0.974847344804	active	TRN-GTT2-1
Homo_sapiens	tRNA-Asn-GTT-2-2	chr1	161428076	161428150	-	24	-26.4	80.9	0.20995945945945943	7	0.023255813953488372	0.3967504250897412	-3.2542500000000003	1	14	active	0.910785501513	active	TRN-GTT2-2
Homo_sapiens	tRNA-Asn-GTT-2-3	chr10	22229508	22229582	-	24	-26.4	80.9	1.4827027027027027	8	0.07235142118863049	0.5639097744360902	-3.18145	0	4	active	0.977363275799	active	TRN-GTT2-3
Homo_sapiens	tRNA-Asn-GTT-2-4	chr13	30673963	30674037	-	24	-26.4	80.9	1.3041081081081076	11	0.07881136950904392	0.9666803784450844	-1.8338999999999999	0	16	active	0.981705649583	active	TRN-GTT2-4
Homo_sapiens	tRNA-Asn-GTT-2-5	chr17	38751780	38751854	-	24	-26.4	80.9	1.6162236842105264	8	0.05555555555555555	0.9926262053318208	-1.8944999999999996	0	87	active	0.984189669175	active	TRN-GTT2-5
Homo_sapiens	tRNA-Asn-GTT-2-6	chr19	1383562	1383636	+	24	-26.4	80.9	0.9742432432432435	9	0.10465116279069768	0.9571277346506705	-2.0341	1	69	active	0.977938895381	active	TRN-GTT2-6
Homo_sapiens	tRNA-Asn-GTT-3-1	chr1	144419266	144419340	+	24	-26.2	79.7	0.09190540540540539	11	0.059431524547803614	0.8556149732620321	-1.4593	0	36	active	0.967972349297	active	TRN-GTT3-1
Homo_sapiens	tRNA-Asn-GTT-4-1	chr1	16889676	16889750	+	24	-26.4	77.7	0.12685135135135137	11	0.05297157622739018	0.7534359993376387	-0.9054	0	39	active	0.956835234971	active	TRN-GTT4-1
Homo_sapiens	tRNA-Asn-GTT-6-1	chr1	143735919	143735993	-	24	-23.8	73.8	0.14420270270270263	11	0.04780361757105943	0.7216494845360825	-1.1054499999999998	0	15	active	0.936104372741	active	TRN-GTT6-1
Homo_sapiens	tRNA-Asn-GTT-8-1	chr1	149740247	149740321	-	24	-22.6	69.8	0.10729729729729728	9	0.041343669250646	0.9283819628647215	-1.08895	0	31	active	0.948009324954	active	TRN-GTT8-1
Homo_sapiens	tRNA-Asn-GTT-10-1	chr1	145129238	145129312	+	24	-18.7	62.7	0.08254054054054047	9	0.021963824289405683	0.2635542168674699	-1.1469999999999998	0	28	inactive	-0.566907392693	active	TRN-GTT10-1
Homo_sapiens	tRNA-Asp-GTC-1-1	chr12	98503502	98503574	+	13	-26.4	65.4	1.1378611111111114	14	0.04792746113989637	0.7889546351084813	-3.8015	1	18	active	0.988294548189	active	TRD-GTC1-1
Homo_sapiens	tRNA-Asp-GTC-2-6	chr6	27479673	27479745	+	13	-26.4	66.5	0.2609861111111111	11	0.04015544041450777	0.8519473081328751	-1.6485000000000003	1	14	active	0.981250518801	active	TRD-GTC2-6
Homo_sapiens	tRNA-Asp-GTC-2-7	chr6	27503743	27503815	+	13	-26.4	66.5	-0.13338888888888892	9	0.02849740932642487	0.6479081821547575	-1.7968999999999997	3	14	active	0.827829781331	active	TRD-GTC2-7
Homo_sapiens	tRNA-Asp-GTC-2-8	chr12	96036020	96036092	+	13	-26.4	66.5	1.6584861111111107	12	0.03756476683937824	0.8458646616541353	-2.7683000000000004	0	57	active	0.988308204042	active	TRD-GTC2-8
Homo_sapiens	tRNA-Asp-GTC-2-9	chr12	124927344	124927416	-	13	-26.4	66.5	1.570013888888889	10	0.04404145077720207	0.7035818713450293	-4.4129000000000005	2	45	active	0.990387643321	active	TRD-GTC2-9
Homo_sapiens	tRNA-Asp-GTC-2-10	chr12	124939646	124939718	-	13	-26.4	66.5	0.7748888888888888	16	0.04792746113989637	0.5998588567395907	-2.61395	1	45	active	0.988949505056	active	TRD-GTC2-10
Homo_sapiens	tRNA-Asp-GTC-2-11	chr17	8222237	8222309	-	13	-26.4	66.5	1.4591944444444431	11	0.03756476683937824	0.5034763845600575	-4.68005	6	113	active	0.98756346531	active	TRD-GTC2-11
Homo_sapiens	tRNA-Asp-GTC-3-1	chr6	27583456	27583528	-	13	-24.3	58.2	-1.1453194444444454	13	0.03367875647668394	0.6471494607087828	-1.2121	2	3	active	0.683091893894	active	TRD-GTC3-1
Homo_sapiens	tRNA-Cys-GCA-1-1	chr7	149310189	149310261	+	29	-26.6	84.1	0.49106944444444456	2	0.0025906735751295338	0.1559367342392515	-1.36225	0	28	inactive	-0.649139217533	inactive	TRC-GCA1-1
Homo_sapiens	tRNA-Cys-GCA-2-1	chr4	123508849	123508921	-	29	-26.1	81.9	0.013944444444444457	13	0.029792746113989636	0.18013381369016984	-0.43034999999999995	0	9	inactive	-0.595189800778	inactive	TRC-GCA2-1
Homo_sapiens	tRNA-Cys-GCA-2-2	chr17	38867644	38867716	+	29	-26.1	81.9	1.393152777777777	14	0.04015544041450777	0.6875327396542692	-3.3373499999999994	2	41	active	0.814685149273	active	TRC-GCA2-2
Homo_sapiens	tRNA-Cys-GCA-2-3	chr17	39153733	39153805	-	29	-26.1	81.9	1.662319444444445	8	0.038860103626943004	0.7206588881262869	-2.05945	1	59	active	0.831034274407	active	TRC-GCA2-3
Homo_sapiens	tRNA-Cys-GCA-2-4	chr17	39154490	39154562	-	29	-26.1	81.9	1.6014722222222226	21	0.046632124352331605	0.7383966244725738	-4.45725	1	58	active	0.829567832111	active	TRC-GCA2-4
Homo_sapiens	tRNA-Cys-GCA-3-1	chr7	149589072	149589144	-	29	-27.3	79.1	0.585986111111111	5	0.006476683937823834	0.18387181507748884	-1.00975	3	9	inactive	-0.802579174061	inactive	TRC-GCA3-1
Homo_sapiens	tRNA-Cys-GCA-4-1	chr17	38869291	38869363	-	29	-23.9	81.8	1.5890000000000004	11	0.04922279792746114	0.6771611995426964	-1.6588999999999998	2	43	active	0.850855157166	active	TRC-GCA4-1
Homo_sapiens	tRNA-Cys-GCA-5-1	chr15	79744654	79744727	+	29	-26.6	78.7	0.9817808219178085	9	0.0129366106080207	0.362962962962963	-3.0567	0	0	inactive	-0.635447346325	inactive	TRC-GCA5-1
Homo_sapiens	tRNA-Cys-GCA-6-1	chr3	132229099	132229171	-	29	-23.8	79.3	1.2750555555555563	9	0.006476683937823834	0.22945804195804195	-1.35305	1	4	inactive	-0.80136702669	inactive	TRC-GCA6-1
Homo_sapiens	tRNA-Cys-GCA-7-1	chr1	93516276	93516349	-	29	-26.6	77.8	0.9985342465753425	9	0.0129366106080207	0.3884033846580663	-3.0340499999999997	0	30	inactive	-0.611951142152	inactive	TRC-GCA7-1
Homo_sapiens	tRNA-Cys-GCA-8-1	chr14	72962970	72963042	+	29	-26.1	77.3	1.0270555555555556	9	0.01683937823834197	0.2978723404255319	-3.0567	0	39	inactive	-0.56350183063	inactive	TRC-GCA8-1
Homo_sapiens	tRNA-Cys-GCA-9-1	chr3	132231797	132231869	-	29	-24.6	77.2	1.330694444444445	11	0.0	0.0	-1.05165	1	4	inactive	-0.81015112262	inactive	TRC-GCA9-1
Homo_sapiens	tRNA-Cys-GCA-9-2	chr7	149331128	149331200	+	29	-24.6	77.2	0.46490277777777805	5	0.0038860103626943004	0.04050925925925926	-1.2423499999999998	0	26	inactive	-0.878469457929	inactive	TRC-GCA9-2
Homo_sapiens	tRNA-Cys-GCA-9-3	chr7	149635686	149635758	+	29	-24.6	77.2	0.3197361111111111	12	0.012953367875647668	0.1257183908045977	-1.91925	0	4	inactive	-0.869393962701	inactive	TRC-GCA9-3
Homo_sapiens	tRNA-Cys-GCA-9-4	chr7	149707668	149707740	+	29	-24.6	77.2	0.49530555555555533	12	0.006476683937823834	0.17641129032258066	-1.5994499999999998	0	41	inactive	-0.934764551038	inactive	TRC-GCA9-4
Homo_sapiens	tRNA-Cys-GCA-10-1	chr7	149377509	149377581	-	29	-24.2	74.9	0.5205285714285713	14	0.006476683937823834	0.13671875	-2.17395	1	9	inactive	-0.820751887921	inactive	TRC-GCA10-1
Homo_sapiens	tRNA-Cys-GCA-11-1	chr7	149415137	149415209	-	29	-24.0	76.9	0.378875	10	0.05569948186528497	1.0715793918918919	-1.4569999999999999	0	16	active	0.825127164997	active	TRC-GCA11-1
Homo_sapiens	tRNA-Cys-GCA-12-1	chr7	149646954	149647026	-	29	-20.4	72.4	0.5706388888888889	11	0.010362694300518135	0.0	-1.4552999999999998	0	10	inactive	-0.846680019522	inactive	TRC-GCA12-1
Homo_sapiens	tRNA-Cys-GCA-13-1	chr7	149355674	149355746	-	29	-24.6	74.0	0.7342361111111112	4	0.007772020725388601	0.1323918799646955	-1.43065	0	18	inactive	-0.945126921676	active	TRC-GCA13-1
Homo_sapiens	tRNA-Cys-GCA-14-1	chr17	38861683	38861755	-	29	-26.1	71.6	0.9506805555555555	11	0.018134715025906734	0.33062535424145095	-1.3307499999999997	2	41	active	0.623350130361	inactive	TRC-GCA14-1
Homo_sapiens	tRNA-Cys-GCA-15-1	chr7	149584724	149584796	+	29	-22.1	70.5	0.2285555555555556	12	0.0051813471502590676	0.2032520325203252	-1.7318500000000003	1	9	inactive	-0.85946207439	inactive	TRC-GCA15-1
Homo_sapiens	tRNA-Cys-GCA-16-1	chr7	149546539	149546611	+	29	-24.6	70.0	0.476402777777778	12	0.0051813471502590676	0.2028985507246377	-1.3401500000000002	0	16	inactive	-0.908327188357	inactive	TRC-GCA16-1
Homo_sapiens	tRNA-Cys-GCA-17-1	chr7	149691180	149691252	-	29	-20.3	70.7	0.45088888888888856	6	0.027202072538860103	0.5699397492265104	-1.7197	0	23	active	0.734946130898	active	TRC-GCA17-1
Homo_sapiens	tRNA-Cys-GCA-18-1	chr7	149375758	149375830	-	29	-22.2	71.8	0.43479166666666663	12	0.0051813471502590676	0.16203703703703703	-2.0329	1	8	inactive	-0.840682690288	inactive	TRC-GCA18-1
Homo_sapiens	tRNA-Cys-GCA-19-1	chr7	149613064	149613136	-	29	-20.8	69.2	0.5723888888888887	5	0.009067357512953367	0.199174847062171	-1.0430500000000003	0	9	inactive	-0.924004229863	inactive	TRC-GCA19-1
Homo_sapiens	tRNA-Cys-GCA-20-1	chr7	149597954	149598026	+	29	-17.5	65.6	0.1451408450704225	7	0.007772020725388601	0.22229279136233726	-1.20675	2	9	inactive	-0.91951051398	inactive	TRC-GCA20-1
Homo_sapiens	tRNA-Cys-GCA-21-1	chr7	149664823	149664895	+	29	-23.9	60.7	0.06945833333333329	24	0.0025906735751295338	0.05582137161084529	-1.7095500000000001	0	22	inactive	-0.922522117109	inactive	TRC-GCA21-1
Homo_sapiens	tRNA-Cys-GCA-22-1	chr7	149556710	149556780	+	29	-19.8	64.9	0.14172857142857134	6	0.00909090909090909	0.227125243348475	-1.1619	0	14	inactive	-0.884248426481	inactive	TRC-GCA22-1
Homo_sapiens	tRNA-Cys-GCA-23-1	chr7	149595213	149595285	-	29	-20.0	59.1	0.062041666666666634	24	0.0051813471502590676	0.051759834368530024	-1.4981	2	9	inactive	-0.86934263021	inactive	TRC-GCA23-1
Homo_sapiens	tRNA-Gln-CTG-1-1	chr6	18836170	18836242	+	13	-24.7	71.5	-0.04108333333333332	323	0.014248704663212436	0.36363636363636365	-0.3964	0	0	inactive	-0.829129060946	inactive	TRQ-CTG1-1
Homo_sapiens	tRNA-Gln-CTG-1-2	chr6	27519528	27519600	+	13	-24.7	71.5	0.8390277777777784	25	0.03367875647668394	0.7281553398058253	-2.516049999999999	0	14	active	0.98192677333	active	TRQ-CTG1-2
Homo_sapiens	tRNA-Gln-CTG-1-3	chr6	28941600	28941672	-	13	-24.7	71.5	1.16025	13	0.027202072538860103	0.5498821681068342	-3.3530499999999996	4	25	active	0.990035663827	active	TRQ-CTG1-3
Homo_sapiens	tRNA-Gln-CTG-1-4	chr15	65869061	65869133	-	13	-24.7	71.5	1.5927916666666668	7	0.042746113989637305	0.7113821138211383	-2.47825	0	28	active	0.989409506978	active	TRQ-CTG1-4
Homo_sapiens	tRNA-Gln-CTG-1-5	chr17	8119751	8119823	+	13	-24.7	71.5	1.4136111111111112	6	0.02072538860103627	0.8641975308641975	-4.41855	4	98	active	0.972501904246	active	TRQ-CTG1-5
Homo_sapiens	tRNA-Gln-CTG-2-1	chr6	27547751	27547823	-	13	-24.7	70.9	0.935666666666666	36	0.02849740932642487	0.5375164545853445	-1.9802999999999997	3	8	active	0.953799895511	active	TRQ-CTG2-1
Homo_sapiens	tRNA-Gln-CTG-4-1	chr1	148265107	148265179	-	13	-24.7	71.9	-0.11302985074626874	29	0.038860103626943004	0.24104683195592286	-1.389421052631579	0	20	active	0.696320741597	active	TRQ-CTG4-1
Homo_sapiens	tRNA-Gln-CTG-4-2	chr1	143691473	143691545	+	13	-24.7	71.9	-0.02678787878787885	29	0.04145077720207254	0.3684210526315789	-0.6942499999999999	0	13	active	0.683751045908	inactive	TRQ-CTG4-2
Homo_sapiens	tRNA-Gln-CTG-5-1	chr6	27295432	27295504	+	13	-24.2	66.2	0.4862500000000002	79	0.023316062176165803	0.3093239063190455	-3.6268000000000007	2	21	active	0.813639839345	active	TRQ-CTG5-1
Homo_sapiens	tRNA-Gln-CTG-6-1	chr6	27791355	27791427	-	13	-21.6	64.7	0.42516666666666647	93	0.018134715025906734	0.49411764705882355	-3.529950000000001	1	14	active	0.676928331757	active	TRQ-CTG6-1
Homo_sapiens	tRNA-Gln-CTG-7-1	chr1	148328811	148328883	+	13	-19.5	58.5	-0.11372727272727279	29	0.03756476683937824	0.20184544405997693	-1.3697000000000001	0	21	active	0.505270692027	inactive	TRQ-CTG7-1
Homo_sapiens	tRNA-Gln-TTG-1-1	chr17	49192527	49192599	+	6	-27.1	72.6	1.6350416666666667	8	0.06865284974093264	0.7529773338455628	0.3245	0	40	active	0.937397073476	active	TRQ-TTG1-1
Homo_sapiens	tRNA-Gln-TTG-2-1	chr6	28589378	28589450	+	6	-27.1	70.0	0.45722222222222203	14	0.038860103626943004	0.49226441631504925	-1.316	1	25	active	0.986637114273	active	TRQ-TTG2-1
Homo_sapiens	tRNA-Gln-TTG-3-1	chr6	26311195	26311267	-	6	-22.0	66.9	0.5170138888888888	7	0.02461139896373057	0.6243032329988851	-2.4974	5	37	active	0.984424352447	active	TRQ-TTG3-1
Homo_sapiens	tRNA-Gln-TTG-3-2	chr6	26311746	26311818	-	6	-22.0	66.9	0.6405972222222223	7	0.02461139896373057	0.5713619402985075	-2.3213	5	37	active	0.983772483539	active	TRQ-TTG3-2
Homo_sapiens	tRNA-Gln-TTG-3-3	chr6	27795860	27795932	-	6	-22.0	66.9	1.0512500000000005	9	0.007772020725388601	0.14705882352941177	-2.8617500000000002	1	15	inactive	-0.521776681845	inactive	TRQ-TTG3-3
Homo_sapiens	tRNA-Gln-TTG-4-1	chr6	145182722	145182794	+	6	-24.1	58.1	-0.046625	14	0.014248704663212436	0.11114639568116863	0.009200000000000012	0	0	inactive	-0.895469056638	inactive	TRQ-TTG4-1
Homo_sapiens	tRNA-Glu-CTC-1-1	chr1	146035691	146035763	+	8	-26.4	73.2	1.3700833333333335	14	0.04533678756476684	0.6780317706315382	-3.882	3	88	active	0.99412519614	active	TRE-CTC1-1
Homo_sapiens	tRNA-Glu-CTC-1-6	chr6	28982198	28982270	+	8	-26.4	73.2	1.0232638888888883	5	0.03756476683937824	1.005128205128205	-3.188	2	28	active	0.990288763125	active	TRE-CTC1-6
Homo_sapiens	tRNA-Glu-CTC-1-7	chr6	125780246	125780318	-	8	-26.4	73.2	1.205777777777779	6	0.025906735751295335	0.5887300252312868	-3.5808999999999997	0	24	active	0.988580770538	active	TRE-CTC1-7
Homo_sapiens	tRNA-Glu-CTC-2-1	chr1	248874247	248874319	+	8	-21.9	68.7	0.9952222222222227	8	0.038860103626943004	0.7297096053611318	-4.0405500000000005	1	44	active	0.98866319774	active	TRE-CTC2-1
Homo_sapiens	tRNA-Glu-TTC-1-1	chr2	130337127	130337199	-	7	-25.0	72.5	0.7134166666666665	10	0.03238341968911917	0.4658067158067158	-2.0576	0	35	active	0.983120061051	active	TRE-TTC1-1
Homo_sapiens	tRNA-Glu-TTC-1-2	chr13	41060737	41060809	-	7	-25.0	72.5	1.5242361111111118	10	0.08031088082901554	0.9664179104477612	-1.6898500000000003	0	21	active	0.976787527361	active	TRE-TTC1-2
Homo_sapiens	tRNA-Glu-TTC-2-1	chr13	44917926	44917998	-	7	-26.7	71.2	1.6371624999999999	8	0.05310880829015544	0.8589511754068716	-4.598049999999999	0	19	active	0.987947215367	active	TRE-TTC2-1
Homo_sapiens	tRNA-Glu-TTC-2-2	chr15	26082233	26082305	-	7	-26.7	71.2	1.4121666666666663	14	0.04792746113989637	0.6858652125756156	-3.7043500000000003	0	17	active	0.987734917312	active	TRE-TTC2-2
Homo_sapiens	tRNA-Glu-TTC-3-1	chr1	16872582	16872654	+	7	-28.9	71.6	0.07479166666666666	3	0.07383419689119171	0.682649329540837	-2.3247500000000003	0	29	active	0.970065468744	active	TRE-TTC3-1
Homo_sapiens	tRNA-Glu-TTC-4-2	chr1	161422092	161422164	-	7	-26.4	68.7	-0.21520833333333333	6	0.04404145077720207	0.6369731800766284	-2.8034000000000003	1	14	active	0.919619774824	active	TRE-TTC4-2
Homo_sapiens	tRNA-Gly-CCC-1-2	chr1	16861920	16861991	+	5	-26.4	78.3	0.04350704225352109	8	0.0311284046692607	0.8137432188065099	-2.2655499999999997	0	21	active	0.96078488279	inactive	TRG-CCC1-2
Homo_sapiens	tRNA-Gly-CCC-2-1	chr2	70248990	70249061	-	5	-31.4	75.1	1.3203239436619723	6	0.05058365758754864	0.711864406779661	-3.574199999999999	0	48	active	0.987295382768	active	TRG-CCC2-1
Homo_sapiens	tRNA-Gly-CCC-2-2	chr16	636735	636806	-	5	-31.4	75.1	1.3414366197183094	5	0.08949416342412451	0.8723345333702576	-4.38745	0	156	active	0.98394888029	active	TRG-CCC2-2
Homo_sapiens	tRNA-Gly-CCC-3-1	chr17	19860861	19860932	+	5	-19.7	68.3	-0.05192957746478874	238	0.02204928664072633	0.5268703898840885	0.057200000000000015	0	31	inactive	-0.581817904934	inactive	TRG-CCC3-1
Homo_sapiens	tRNA-Gly-GCC-1-5	chr21	17454788	17454859	-	14	-28.8	80.9	0.0824788732394366	13	0.0324254215304799	0.34970025692263773	-0.8214000000000002	0	6	active	0.724125197887	active	TRG-GCC1-5
Homo_sapiens	tRNA-Gly-GCC-2-1	chr1	161523846	161523917	-	14	-26.4	81.0	1.2462816901408444	6	0.041504539559014265	0.6598793363499246	-2.7149500000000004	2	27	active	0.99412519614	active	TRG-GCC2-1
Homo_sapiens	tRNA-Gly-GCC-2-2	chr2	156401146	156401217	-	14	-26.4	81.0	1.0786056338028172	2	0.019455252918287938	0.13747054202670855	-4.046900000000001	1	17	active	0.772068003875	active	TRG-GCC2-2
Homo_sapiens	tRNA-Gly-GCC-2-3	chr6	27902907	27902978	-	14	-26.4	81.0	1.0943239436619718	9	0.041504539559014265	0.8536585365853658	-3.6139	1	16	active	0.989308968402	active	TRG-GCC2-3
Homo_sapiens	tRNA-Gly-GCC-2-4	chr16	70779038	70779109	-	14	-26.4	81.0	0.9039999999999999	12	0.011673151750972763	0.0	-0.43769999999999987	2	39	inactive	-0.586279385122	inactive	TRG-GCC2-4
Homo_sapiens	tRNA-Gly-GCC-2-5	chr16	70789506	70789577	+	14	-26.4	81.0	1.325098591549295	136	0.019455252918287938	0.14747191011235955	0.1882	1	44	active	0.677748854799	inactive	TRG-GCC2-5
Homo_sapiens	tRNA-Gly-GCC-2-6	chr17	8125745	8125816	+	14	-26.4	81.0	1.0275633802816901	9	0.05966277561608301	0.6749698674166332	-3.3384	4	89	active	0.98294195512	active	TRG-GCC2-6
Homo_sapiens	tRNA-Gly-GCC-3-1	chr16	70778210	70778281	-	14	-26.4	75.0	0.48671830985915476	11	0.014267185473411154	0.2182952182952183	-0.2961	1	39	inactive	-0.762676755561	inactive	TRG-GCC3-1
Homo_sapiens	tRNA-Gly-GCC-4-1	chr1	161480565	161480636	+	14	-19.5	69.4	0.09321126760563384	13	0.03372243839169909	0.43482415902140675	-0.45665000000000006	1	25	active	0.690469771946	inactive	TRG-GCC4-1
Homo_sapiens	tRNA-Gly-GCC-5-1	chr16	70788693	70788764	+	14	-16.1	54.7	1.393253521126761	12	0.014267185473411154	0.1715686274509804	-0.8242499999999999	2	44	inactive	-0.772448528078	inactive	TRG-GCC5-1
Homo_sapiens	tRNA-Gly-TCC-1-1	chr19	4724069	4724141	+	9	-25.1	73.8	1.0096944444444451	11	0.07512953367875648	0.8885826200493254	-4.369	1	49	active	0.983544356678	active	TRG-TCC1-1
Homo_sapiens	tRNA-Gly-TCC-2-1	chr1	146037060	146037132	+	9	-25.1	73.8	1.356791666666667	7	0.023316062176165803	0.4026459591601956	-3.5201000000000002	3	89	active	0.960658840481	active	TRG-TCC2-1
Homo_sapiens	tRNA-Gly-TCC-2-6	chr1	161531112	161531184	+	9	-25.1	73.8	0.9995972222222225	4	0.06088082901554404	0.9697357203751066	-3.2084999999999995	3	29	active	0.993069475896	active	TRG-TCC2-6
Homo_sapiens	tRNA-Gly-TCC-3-1	chr17	8221547	8221619	+	9	-25.1	73.8	1.1233611111111113	5	0.06606217616580311	0.7777777777777778	-2.1925	6	115	active	0.984149413518	active	TRG-TCC3-1
Homo_sapiens	tRNA-Gly-TCC-4-1	chr1	161440170	161440242	-	9	-15.8	56.0	0.29605555555555574	11	0.10492227979274611	0.9675704412546517	-0.3077500000000001	7	17	active	0.625148393604	active	TRG-TCC4-1
Homo_sapiens	tRNA-His-GTG-1-1	chr1	146038043	146038115	+	9	-25.5	60.1	1.3459583333333325	27	0.06217616580310881	0.7924827351975546	-1.0970499999999999	3	89	active	0.978799396836	active	TRH-GTG1-1
Homo_sapiens	tRNA-His-GTG-1-2	chr1	147073224	147073296	+	9	-25.5	60.1	0.19737500000000002	31	0.038860103626943004	0.5264375795441397	-0.7048	0	17	active	0.934697305254	active	TRH-GTG1-2
Homo_sapiens	tRNA-His-GTG-1-5	chr6	27158126	27158198	+	9	-25.5	60.1	0.6159444444444442	59	0.029792746113989636	0.46511627906976744	-1.0153	1	11	active	0.904331358929	active	TRH-GTG1-5
Homo_sapiens	tRNA-His-GTG-1-6	chr9	14433939	14434011	-	9	-25.5	60.1	1.0045000000000002	13	0.015544041450777202	0.16666666666666666	0.04065000000000002	0	1	inactive	-0.78905304714	inactive	TRH-GTG1-6
Homo_sapiens	tRNA-His-GTG-1-7	chr15	45198605	45198677	-	9	-25.5	60.1	1.5606666666666673	34	0.04792746113989637	0.6708836496070538	0.49759999999999993	2	75	active	0.959345418311	active	TRH-GTG1-7
Homo_sapiens	tRNA-His-GTG-1-8	chr15	45200412	45200484	-	9	-25.5	60.1	1.6055357142857147	33	0.04404145077720207	0.5617283950617284	-2.7803	2	76	active	0.974388930023	active	TRH-GTG1-8
Homo_sapiens	tRNA-His-GTG-1-9	chr15	45201150	45201222	+	9	-25.5	60.1	1.5466527777777774	30	0.04404145077720207	0.7133152173913043	0.10289999999999995	2	76	active	0.959345418311	active	TRH-GTG1-9
Homo_sapiens	tRNA-Ile-AAT-1-1	chr6	57822972	57823046	+	15	-27.4	81.9	0.1384999999999999	5	0.05297157622739018	0.8913857677902621	-2.49205	1	15	active	0.987471969536	active	TRI-AAT1-1
Homo_sapiens	tRNA-Ile-AAT-2-1	chr6	27688187	27688261	+	15	-27.6	86.3	0.523216216216216	15	0.05167958656330749	0.8054690672803574	-2.2792499999999998	2	10	active	0.976855344655	active	TRI-AAT2-1
Homo_sapiens	tRNA-Ile-AAT-3-1	chr6	27275210	27275284	-	15	-24.7	84.9	0.3515000000000001	4	0.03229974160206718	0.7514761137949544	-2.6676842105263154	2	18	active	0.986091668763	active	TRI-AAT3-1
Homo_sapiens	tRNA-Ile-AAT-4-1	chr17	8226990	8227064	-	15	-25.5	81.2	1.3057567567567572	9	0.037467700258397935	0.34539473684210525	-4.140700000000001	6	101	active	0.885496672246	active	TRI-AAT4-1
Homo_sapiens	tRNA-Ile-AAT-5-1	chr6	26554121	26554195	+	15	-25.5	81.2	1.4290405405405424	6	0.023255813953488372	0.5017921146953405	-3.5213	3	26	active	0.978966967639	active	TRI-AAT5-1
Homo_sapiens	tRNA-Ile-AAT-5-2	chr6	27177214	27177288	-	15	-25.5	81.2	0.5303648648648648	14	0.04392764857881137	0.6760316066725197	-2.5846999999999993	0	19	active	0.985236482241	active	TRI-AAT5-2
Homo_sapiens	tRNA-Ile-AAT-5-3	chr6	27237570	27237644	-	15	-25.5	81.2	0.23690540540540547	26	0.03229974160206718	0.6907894736842105	-2.2223499999999996	2	16	active	0.981864192692	active	TRI-AAT5-3
Homo_sapiens	tRNA-Ile-AAT-5-4	chr14	102317091	102317165	+	15	-25.5	81.2	1.0577702702702703	7	0.06589147286821706	0.8101851851851852	-2.6168499999999995	0	34	active	0.988239779005	active	TRI-AAT5-4
Homo_sapiens	tRNA-Ile-AAT-5-5	chr17	8187592	8187666	+	15	-25.5	81.2	1.659972972972973	10	0.03875968992248062	0.6538722826086957	-5.554800000000001	3	107	active	0.987795735811	active	TRI-AAT5-5
Homo_sapiens	tRNA-Ile-AAT-6-1	chr6	26756551	26756625	+	15	-25.3	81.6	0.1466621621621621	8	0.031007751937984496	0.8651129943502824	-2.54915	1	11	active	0.964543136112	active	TRI-AAT6-1
Homo_sapiens	tRNA-Ile-AAT-8-1	chr6	27668582	27668656	+	15	-26.3	75.8	0.35437837837837843	43	0.04263565891472868	0.7692307692307693	-3.00135	2	7	active	0.953212364038	active	TRI-AAT8-1
Homo_sapiens	tRNA-Ile-AAT-9-1	chr6	27273959	27274033	+	15	-21.2	79.3	0.23213513513513515	4	0.01808785529715762	0.0	-1.1208999999999998	2	18	active	0.533457447095	inactive	TRI-AAT9-1
Homo_sapiens	tRNA-Ile-GAT-1-1	chrX	3838376	3838450	-	3	-31.9	75.5	1.0219324324324324	10	0.07622739018087855	0.8021390374331551	-2.45225	0	5	active	0.987381576512	inactive	TRI-GAT1-1
Homo_sapiens	tRNA-Ile-TAT-1-1	chr19	39412167	39412260	-	5	-28.0	73.8	1.4914054054054051	1	0.05170239596469105	0.8012820512820513	0.2029	0	110	active	0.932947797014	active	TRI-TAT1-1
Homo_sapiens	tRNA-Ile-TAT-2-1	chr2	42810535	42810628	+	5	-30.2	73.2	1.4728918918918927	6	0.09457755359394704	0.9326845093268451	0.27475000000000005	0	23	active	0.928648663179	active	TRI-TAT2-1
Homo_sapiens	tRNA-Ile-TAT-2-2	chr6	27020345	27020439	+	5	-33.2	73.1	0.8469864864864864	3	0.0654911838790932	0.9181833087391376	-1.6562999999999999	0	6	active	0.964874213148	active	TRI-TAT2-2
Homo_sapiens	tRNA-Ile-TAT-2-3	chr6	27631420	27631514	+	5	-31.9	73.1	-0.11694594594594594	2	0.037783375314861464	0.8032128514056225	-1.3624999999999998	0	3	active	0.795050840465	active	TRI-TAT2-3
Homo_sapiens	tRNA-Ile-TAT-3-1	chr6	28537589	28537683	+	5	-30.9	72.1	0.6524864864864864	1	0.031486146095717885	0.5221653878942881	-2.4381	1	21	active	0.972028136406	active	TRI-TAT3-1
Homo_sapiens	tRNA-Leu-AAG-1-3	chr5	181174043	181174125	-	9	-33.3	75.2	0.020085365853658534	19	0.054987212276214836	0.6524725274725275	-3.13615	3	41	active	0.919712590745	active	TRL-AAG1-3
Homo_sapiens	tRNA-Leu-AAG-2-1	chr5	181187700	181187782	+	9	-32.4	74.8	0.009536585365853624	11	0.04219948849104859	0.3840877914951989	-4.579700000000001	3	47	active	0.866153964649	active	TRL-AAG2-1
Homo_sapiens	tRNA-Leu-AAG-2-2	chr6	28943621	28943703	-	9	-32.4	74.8	0.7093292682926828	10	0.03324808184143223	0.42187157571772954	-2.52015	5	25	active	0.974252718227	active	TRL-AAG2-2
Homo_sapiens	tRNA-Leu-AAG-2-3	chr14	20610131	20610213	+	9	-32.4	74.8	1.2830365853658536	10	0.05115089514066496	0.8101851851851852	-3.7616500000000004	3	19	active	0.986670342565	active	TRL-AAG2-3
Homo_sapiens	tRNA-Leu-AAG-2-4	chr16	22297139	22297221	+	9	-32.4	74.8	1.5389285714285712	11	0.07289002557544758	0.7182835820895522	-4.360049999999999	0	47	active	0.986609730014	active	TRL-AAG2-4
Homo_sapiens	tRNA-Leu-AAG-3-1	chr6	28989001	28989083	+	9	-32.4	73.8	0.6394390243902436	5	0.05370843989769821	0.7119333591631151	-2.41495	2	25	active	0.989560864607	active	TRL-AAG3-1
Homo_sapiens	tRNA-Leu-AAG-4-1	chr6	28478622	28478704	-	9	-27.7	64.4	0.248829268292683	58	0.024296675191815855	0.7028112449799196	-1.6781	1	24	active	0.970443065087	inactive	TRL-AAG4-1
Homo_sapiens	tRNA-Leu-CAA-1-1	chr6	28896222	28896328	-	7	-36.7	77.2	1.2604819277108434	5	0.05334987593052109	0.8664796170985312	-2.5425999999999997	0	14	active	0.984999377855	active	TRL-CAA1-1
Homo_sapiens	tRNA-Leu-CAA-1-2	chr6	28941052	28941157	+	7	-38.1	77.2	0.7732530120481931	17	0.03975155279503106	1.0951910408432148	-2.4475000000000002	4	25	active	0.96340353824	active	TRL-CAA1-2
Homo_sapiens	tRNA-Leu-CAA-2-1	chr6	27605637	27605745	-	7	-38.9	78.0	0.6992738095238098	10	0.038366336633663366	0.628279480806407	-2.4076500000000003	1	0	active	0.927925245437	active	TRL-CAA2-1
Homo_sapiens	tRNA-Leu-CAA-3-1	chr6	27602568	27602675	-	7	-38.2	77.3	0.1908095238095237	6	0.0322180916976456	0.7368421052631579	-1.0965999999999998	2	0	active	0.897875754664	active	TRL-CAA3-1
Homo_sapiens	tRNA-Leu-CAA-4-1	chr1	248873854	248873960	+	7	-43.4	73.6	0.9040952380952386	6	0.06699751861042183	0.8856275303643725	-1.6198500000000002	1	44	active	0.981419760866	active	TRL-CAA4-1
Homo_sapiens	tRNA-Leu-CAA-5-1	chr11	9275242	9275316	+	7	-24.0	66.5	-0.051027027027027	49	0.016795865633074936	0.13597513597513597	-0.37039999999999995	0	12	inactive	-0.85464917454	inactive	TRL-CAA5-1
Homo_sapiens	tRNA-Leu-CAA-6-1	chr1	161611945	161612029	-	7	-28.2	57.5	1.1199523809523817	7	0.03826530612244898	0.8801775147928994	-3.887105263157895	0	32	active	0.798767173498	active	TRL-CAA6-1
Homo_sapiens	tRNA-Leu-CAG-1-1	chr1	161441532	161441615	+	9	-35.7	78.2	0.331433734939759	8	0.12132822477650064	1.0695468914646997	-0.01990000000000002	8	14	active	0.954451713887	inactive	TRL-CAG1-1
Homo_sapiens	tRNA-Leu-CAG-1-6	chr1	161530341	161530424	-	9	-35.7	78.2	1.0582168674698802	7	0.035759897828863345	0.8237716975581053	-3.6174999999999997	3	28	active	0.991274617571	active	TRL-CAG1-6
Homo_sapiens	tRNA-Leu-CAG-1-7	chr6	26521207	26521290	+	9	-35.7	78.2	1.2832168674698796	8	0.06002554278416347	0.7824143070044709	-4.8355999999999995	0	40	active	0.978157457075	active	TRL-CAG1-7
Homo_sapiens	tRNA-Leu-CAG-2-1	chr16	57299950	57300033	+	9	-32.8	77.3	1.1382771084337342	7	0.05108556832694764	0.7457386363636364	-2.4284	1	21	active	0.982997152483	active	TRL-CAG2-1
Homo_sapiens	tRNA-Leu-CAG-2-2	chr16	57300479	57300562	-	9	-32.8	77.3	1.4740602409638544	12	0.04597701149425287	0.6954184198223469	-4.3721499999999995	1	21	active	0.985528067972	active	TRL-CAG2-2
Homo_sapiens	tRNA-Leu-TAA-1-1	chr6	144216546	144216629	+	4	-32.3	88.7	1.3469638554216858	8	0.07407407407407407	0.9546368073499857	-1.8625499999999995	0	9	active	0.987229515819	active	TRL-TAA1-1
Homo_sapiens	tRNA-Leu-TAA-2-1	chr6	27721118	27721201	-	4	-33.5	90.8	0.6636626506024101	7	0.024265644955300127	0.28583095140873827	-2.4760999999999997	1	10	active	0.867088103609	active	TRL-TAA2-1
Homo_sapiens	tRNA-Leu-TAA-3-1	chr11	59551754	59551837	+	4	-28.2	85.0	0.12100000000000001	11	0.03065134099616858	0.8820564516129032	-3.48825	6	35	active	0.983544413057	active	TRL-TAA3-1
Homo_sapiens	tRNA-Leu-TAA-4-1	chr6	27230554	27230637	-	4	-31.2	83.8	0.3186144578313254	154	0.033205619412515965	0.7155838255338483	-1.6314	2	13	active	0.906835553982	active	TRL-TAA4-1
Homo_sapiens	tRNA-Leu-TAG-1-1	chr17	8120313	8120395	-	3	-33.3	75.2	1.6072380952380958	8	0.03580562659846547	0.6708652792990142	-2.7682500000000005	4	97	active	0.914302684327	active	TRL-TAG1-1
Homo_sapiens	tRNA-Leu-TAG-2-1	chr14	20625369	20625451	+	3	-30.9	74.1	0.9780365853658547	8	0.03324808184143223	0.6784260515603799	-3.7676500000000006	2	22	active	0.93199014161	active	TRL-TAG2-1
Homo_sapiens	tRNA-Leu-TAG-3-1	chr16	22195710	22195792	-	3	-30.8	73.9	1.5206785714285713	18	0.03580562659846547	0.9178321678321678	-3.5437999999999996	0	55	active	0.923660948176	active	TRL-TAG3-1
Homo_sapiens	tRNA-Lys-CTT-1-1	chr14	58239894	58239967	-	15	-30.1	88.0	1.3352739726027412	11	0.027166882276843468	1.0144927536231885	-3.7204499999999996	0	36	active	0.985338132893	active	TRK-CTT1-1
Homo_sapiens	tRNA-Lys-CTT-1-2	chr15	78860561	78860634	+	15	-30.1	88.0	0.46289041095890404	6	0.03234152652005175	0.7486631016042781	-2.5691999999999995	0	32	active	0.985160031403	active	TRK-CTT1-2
Homo_sapiens	tRNA-Lys-CTT-2-1	chr1	146039400	146039473	+	15	-28.0	87.8	1.189616438356165	5	0.045278137128072445	0.647634152788792	-3.951949999999999	3	90	active	0.993839350379	active	TRK-CTT2-1
Homo_sapiens	tRNA-Lys-CTT-2-2	chr5	181207754	181207827	+	15	-28.0	87.8	1.163972602739726	11	0.037516170763260026	0.8608217592592593	-3.7761999999999993	1	49	active	0.990790036725	active	TRK-CTT2-2
Homo_sapiens	tRNA-Lys-CTT-2-3	chr5	181221978	181222051	-	15	-28.0	87.8	0.30650684931506844	9	0.045278137128072445	0.5923597678916828	-2.8411999999999997	2	50	active	0.989780926689	active	TRK-CTT2-3
Homo_sapiens	tRNA-Lys-CTT-2-4	chr6	26556545	26556618	+	15	-28.0	87.8	1.104904109589042	6	0.02069857697283312	0.3868115675078283	-4.6134	3	26	active	0.911069172648	active	TRK-CTT2-4
Homo_sapiens	tRNA-Lys-CTT-2-5	chr16	3175690	3175763	+	15	-28.0	87.8	0.12499999999999994	5	0.04398447606727038	0.6320949432404541	-0.6889500000000001	4	59	active	0.943638845881	active	TRK-CTT2-5
Homo_sapiens	tRNA-Lys-CTT-3-1	chr16	3157404	3157477	-	15	-28.0	83.1	0.5329589041095892	5	0.062095730918499355	0.8469626168224299	-3.6730000000000005	4	53	active	0.987740443012	active	TRK-CTT3-1
Homo_sapiens	tRNA-Lys-CTT-4-1	chr16	3191500	3191573	+	15	-27.1	82.3	0.16916438356164376	5	0.045278137128072445	0.65625	-1.3659500000000002	6	54	active	0.970787818664	active	TRK-CTT4-1
Homo_sapiens	tRNA-Lys-CTT-5-1	chr16	3180553	3180626	-	15	-23.6	69.3	0.15265753424657533	4	0.03234152652005175	0.6481481481481481	-1.50125	6	60	active	0.972209533173	active	TRK-CTT5-1
Homo_sapiens	tRNA-Lys-CTT-7-1	chr1	54957868	54957941	-	15	-16.2	64.8	?	351	0.00646830530401035	0.0	?	0	21	inactive	-0.784550270926	inactive	TRK-CTT7-1
Homo_sapiens	tRNA-Lys-CTT-8-1	chr16	3164937	3165010	+	15	-15.9	57.8	0.28909589041095884	4	0.02457956015523933	0.3798155181768855	-2.3621499999999997	3	58	active	0.795194641686	inactive	TRK-CTT8-1
Homo_sapiens	tRNA-Lys-CTT-9-1	chr5	26198429	26198502	-	15	-23.7	58.2	-0.08053424657534244	170	0.00646830530401035	0.0	-0.36445000000000005	0	0	inactive	-0.918112545488	inactive	TRK-CTT9-1
Homo_sapiens	tRNA-Lys-CTT-10-1	chr19	35575847	35575920	+	15	-19.1	54.8	-0.04495890410958902	61	0.02069857697283312	0.39281705948372614	0.046950000000000006	0	113	inactive	-0.755961836587	inactive	TRK-CTT10-1
Homo_sapiens	tRNA-Lys-CTT-11-1	chr19	51922144	51922215	-	15	-16.0	56.6	-0.0807605633802817	351	0.014267185473411154	0.09249471458773785	0.17149999999999999	0	43	inactive	-0.975255891608	inactive	TRK-CTT11-1
Homo_sapiens	tRNA-Lys-TTT-1-1	chr16	73478316	73478389	-	12	-26.0	89.0	0.1402328767123287	11	0.019404915912031046	0.16583747927031509	-0.7525999999999999	0	3	active	0.658816539828	inactive	TRK-TTT1-1
Homo_sapiens	tRNA-Lys-TTT-2-1	chr11	122559946	122560019	+	12	-26.0	87.7	-0.08535616438356171	10	0.016817593790426907	0.4375	-0.39965	0	1	inactive	-0.501930120143	active	TRK-TTT2-1
Homo_sapiens	tRNA-Lys-TTT-3-1	chr1	204506526	204506599	+	12	-27.5	87.8	0.4488356164383563	7	0.037516170763260026	0.8137432188065099	-3.1059499999999995	1	53	active	0.992272411892	active	TRK-TTT3-1
Homo_sapiens	tRNA-Lys-TTT-3-2	chr1	204507029	204507102	-	12	-27.5	87.8	1.3952191780821932	10	0.02457956015523933	0.7643438554695255	-3.4087000000000005	1	52	active	0.963144244493	active	TRK-TTT3-2
Homo_sapiens	tRNA-Lys-TTT-3-3	chr6	28951028	28951101	+	12	-27.5	87.8	0.3114246575342466	11	0.02199223803363519	0.6072874493927125	-1.52275	5	27	active	0.962564896858	active	TRK-TTT3-3
Homo_sapiens	tRNA-Lys-TTT-3-4	chr11	59560334	59560407	-	12	-27.5	87.8	1.2775753424657534	5	0.040103492884864166	0.8812615955473099	-3.7586999999999997	7	34	active	0.990388360681	active	TRK-TTT3-4
Homo_sapiens	tRNA-Lys-TTT-3-5	chr17	8119154	8119227	+	12	-27.5	87.8	1.6690547945205476	12	0.04398447606727038	0.6872852233676976	-5.058750000000001	4	98	active	0.987682338212	active	TRK-TTT3-5
Homo_sapiens	tRNA-Lys-TTT-4-1	chr6	27591813	27591886	-	12	-26.0	86.8	0.3123835616438358	11	0.02199223803363519	0.7466666666666667	-2.0832000000000006	2	2	active	0.922810994546	active	TRK-TTT4-1
Homo_sapiens	tRNA-Lys-TTT-5-1	chr11	59556428	59556501	+	12	-26.8	84.9	0.9823424657534249	7	0.03492884864165589	0.7376185458377239	-3.76695	7	34	active	0.99025239691	active	TRK-TTT5-1
Homo_sapiens	tRNA-Lys-TTT-6-1	chr6	27334989	27335062	-	12	-28.0	85.2	0.1547808219178082	13	0.02199223803363519	0.6463527239150508	-3.8087500000000007	1	17	active	0.960768794414	active	TRK-TTT6-1
Homo_sapiens	tRNA-Lys-TTT-7-1	chr6	28747743	28747816	+	12	-19.6	74.9	0.10532876712328763	13	0.03234152652005175	0.6844850065189049	-2.3933500000000003	1	1	active	0.768058426462	active	TRK-TTT7-1
Homo_sapiens	tRNA-Lys-TTT-11-1	chr12	27690372	27690445	+	12	-16.3	50.7	-0.0708767123287671	271	0.00646830530401035	0.2517532817838518	-0.14540000000000003	0	46	inactive	-0.908309604013	inactive	TRK-TTT11-1
Homo_sapiens	tRNA-Met-CAT-1-1	chr8	123157229	123157302	-	20	-25.0	82.3	1.012630136986302	6	0.06338939197930142	0.7884856070087609	-1.9416000000000004	0	38	active	0.988637495661	active	TRM-CAT1-1
Homo_sapiens	tRNA-Met-CAT-2-1	chr16	71426492	71426565	+	20	-26.7	82.7	0.6889178082191779	4	0.050452781371280724	0.6605691056910569	-1.79195	0	44	active	0.982861101036	active	TRM-CAT2-1
Homo_sapiens	tRNA-Met-CAT-3-1	chr6	28944574	28944647	+	20	-25.8	77.4	1.1704109589041098	9	0.0258732212160414	0.6931836936788249	-2.86105	5	25	active	0.988003817748	active	TRM-CAT3-1
Homo_sapiens	tRNA-Met-CAT-3-2	chr6	28953264	28953337	-	20	-25.8	77.4	1.0731369863013696	7	0.02328589909443726	0.516550706304027	-2.9021	3	27	active	0.98181243326	active	TRM-CAT3-2
Homo_sapiens	tRNA-Met-CAT-4-2	chr6	26743262	26743335	+	20	-26.7	80.2	0.4123835616438357	2	0.037516170763260026	0.6269337241491614	-3.1539500000000005	1	15	active	0.985461129997	active	TRM-CAT4-2
Homo_sapiens	tRNA-Met-CAT-6-1	chr16	87384021	87384094	-	20	-25.0	77.4	0.2335342465753423	8	0.12160413971539456	1.0227189714369203	-0.5458500000000002	0	34	active	0.769457959165	active	TRM-CAT6-1
Homo_sapiens	tRNA-Met-CAT-7-1	chr6	57842213	57842286	-	20	-24.8	66.2	-0.11379452054794519	4	0.015523932729624839	0.3868828297715549	-1.2159499999999999	1	16	inactive	-0.503905129472	inactive	TRM-CAT7-1
Homo_sapiens	tRNA-Phe-GAA-1-1	chr6	28790721	28790794	-	10	-21.9	88.9	0.26619178082191775	3	0.03234152652005175	0.16374269005847952	-1.7792000000000006	2	3	active	0.777486718617	active	TRF-GAA1-1
Homo_sapiens	tRNA-Phe-GAA-1-2	chr6	28981671	28981744	-	10	-21.9	88.9	0.6241095890410961	13	0.03363518758085381	0.9634634634634635	-1.4786000000000001	2	28	active	0.984371489641	active	TRF-GAA1-2
Homo_sapiens	tRNA-Phe-GAA-1-3	chr11	59557496	59557569	-	10	-21.9	88.9	1.2494931506849312	4	0.047865459249676584	0.8268367587999055	-2.94685	7	34	active	0.989421877261	active	TRF-GAA1-3
Homo_sapiens	tRNA-Phe-GAA-1-4	chr12	124927842	124927915	-	10	-21.9	88.9	1.361301369863012	7	0.04139715394566624	0.6201275690999292	-2.88915	2	45	active	0.986224249229	active	TRF-GAA1-4
Homo_sapiens	tRNA-Phe-GAA-1-5	chr13	94549649	94549722	-	10	-21.9	88.9	1.11254794520548	5	0.08279430789133248	0.8203125	-2.53735	0	27	active	0.983205674421	active	TRF-GAA1-5
Homo_sapiens	tRNA-Phe-GAA-1-6	chr19	1383361	1383434	-	10	-21.9	88.9	0.49360273972602753	4	0.07373868046571798	1.09717868338558	-0.7822500000000001	1	69	active	0.946309731606	active	TRF-GAA1-6
Homo_sapiens	tRNA-Phe-GAA-2-1	chr11	59566379	59566452	-	10	-21.9	87.9	0.333041095890411	9	0.03234152652005175	0.5608974358974359	-3.8881	3	39	active	0.988803342848	active	TRF-GAA2-1
Homo_sapiens	tRNA-Phe-GAA-3-1	chr6	28807832	28807905	-	10	-22.0	88.3	0.08160273972602734	6	0.016817593790426907	0.4449152542372881	-1.03985	3	3	active	0.567538755766	active	TRF-GAA3-1
Homo_sapiens	tRNA-Phe-GAA-4-1	chr6	28823315	28823389	-	10	-19.9	75.5	0.07878378378378376	6	0.023255813953488372	0.7911667536080682	-0.6412000000000001	1	4	active	0.873668898255	inactive	TRF-GAA4-1
Homo_sapiens	tRNA-Phe-GAA-6-1	chr6	28763596	28763670	-	10	-14.6	58.8	-0.07213513513513518	6	0.025839793281653745	0.5439005439005439	-0.50645	1	1	active	0.658610674993	inactive	TRF-GAA6-1
Homo_sapiens	tRNA-Pro-AGG-1-1	chr16	3191988	3192060	+	9	-29.5	71.5	-0.19220833333333331	9	0.05181347150259067	0.4943502824858757	-0.8951	6	53	active	0.926298166754	active	TRP-AGG1-1
Homo_sapiens	tRNA-Pro-AGG-2-1	chr1	167715487	167715559	-	9	-29.5	70.2	1.5214027777777785	2	0.03238341968911917	0.703125	-4.0093499999999995	1	14	active	0.993212670777	active	TRP-AGG2-1
Homo_sapiens	tRNA-Pro-AGG-2-2	chr6	26555269	26555341	+	9	-29.5	70.2	1.441611111111109	3	0.03367875647668394	0.6238859180035651	-3.8951000000000002	3	26	active	0.989269417154	active	TRP-AGG2-2
Homo_sapiens	tRNA-Pro-AGG-2-3	chr7	128783449	128783521	+	9	-29.5	70.2	1.4451944444444447	3	0.02072538860103627	0.24888888888888888	-1.36675	0	97	active	0.78149941361	active	TRP-AGG2-3
Homo_sapiens	tRNA-Pro-AGG-2-4	chr11	76235512	76235584	+	9	-29.5	70.2	1.4434166666666666	3	0.07512953367875648	0.8319672131147541	-4.7897	1	18	active	0.987117750061	active	TRP-AGG2-4
Homo_sapiens	tRNA-Pro-AGG-2-5	chr14	20609335	20609407	-	9	-29.5	70.2	0.9891527777777779	6	0.027202072538860103	0.7539353769676885	-3.2921	3	19	active	0.989430580813	active	TRP-AGG2-5
Homo_sapiens	tRNA-Pro-AGG-2-6	chr14	20613400	20613472	-	9	-29.5	70.2	1.2128611111111107	6	0.03756476683937824	0.7867132867132867	-4.1335999999999995	3	19	active	0.988172241575	active	TRP-AGG2-6
Homo_sapiens	tRNA-Pro-AGG-2-7	chr16	3182634	3182706	-	9	-29.5	70.2	0.5199861111111113	2	0.05958549222797927	0.735603194619588	-4.1438999999999995	7	61	active	0.985977061872	active	TRP-AGG2-7
Homo_sapiens	tRNA-Pro-AGG-2-8	chr16	3189633	3189705	+	9	-29.5	70.2	0.570722222222222	3	0.05569948186528497	0.6886374815543532	-4.625400000000001	7	58	active	0.985977061872	active	TRP-AGG2-8
Homo_sapiens	tRNA-Pro-CGG-1-1	chr1	167714724	167714796	+	4	-29.5	70.2	1.2210694444444452	4	0.07253886010362694	0.8501040943789036	-0.9502999999999997	1	14	active	0.978717549794	active	TRP-CGG1-1
Homo_sapiens	tRNA-Pro-CGG-1-2	chr16	3172047	3172119	+	4	-29.5	70.2	0.2021805555555555	13	0.05569948186528497	0.5608974358974359	-0.8027500000000002	3	58	active	0.973209435516	active	TRP-CGG1-2
Homo_sapiens	tRNA-Pro-CGG-1-3	chr17	8222832	8222904	-	4	-29.5	70.2	1.4651666666666658	9	0.06347150259067358	0.8297771455666193	-2.8531500000000003	6	110	active	0.98624081767	active	TRP-CGG1-3
Homo_sapiens	tRNA-Pro-CGG-2-1	chr6	27091741	27091813	+	4	-27.6	65.9	0.7369027777777781	6	0.029792746113989636	0.0	-2.4962	1	12	active	0.861507726729	active	TRP-CGG2-1
Homo_sapiens	tRNA-Pro-TGG-1-1	chr14	20633005	20633077	+	7	-29.5	74.9	0.36730555555555555	233	0.05310880829015544	1.0310796877301518	-3.2224000000000004	2	21	active	0.893575686175	active	TRP-TGG1-1
Homo_sapiens	tRNA-Pro-TGG-2-1	chr11	76235824	76235896	-	7	-28.9	70.5	1.6294166666666674	3	0.06994818652849741	0.7	-4.07095	1	18	active	0.988788756882	active	TRP-TGG2-1
Homo_sapiens	tRNA-Pro-TGG-3-1	chr5	181188853	181188925	-	7	-29.5	70.3	0.9638055555555558	2	0.04922279792746114	0.7051961823966065	-3.72125	3	48	active	0.990933410876	active	TRP-TGG3-1
Homo_sapiens	tRNA-Pro-TGG-3-2	chr14	20684015	20684087	+	7	-29.5	70.3	1.552055555555555	12	0.04015544041450777	0.33933518005540164	-3.6153	2	15	active	0.958782770406	active	TRP-TGG3-2
Homo_sapiens	tRNA-Pro-TGG-3-3	chr16	3158921	3158993	+	7	-29.5	70.3	0.8872361111111113	2	0.08549222797927461	0.7380952380952381	-5.01495	4	55	active	0.981313066294	active	TRP-TGG3-3
Homo_sapiens	tRNA-Pro-TGG-3-4	chr16	3184132	3184204	-	7	-29.5	70.3	0.2522083333333333	2	0.05829015544041451	0.7530120481927711	-2.199631578947369	8	61	active	0.880276398309	active	TRP-TGG3-4
Homo_sapiens	tRNA-Pro-TGG-3-5	chr16	3188093	3188165	+	7	-29.5	70.3	0.17583333333333329	2	0.05310880829015544	0.7809013833110219	-1.9747499999999993	7	58	active	0.976412283422	active	TRP-TGG3-5
Homo_sapiens	tRNA-SeC-TCA-1-1	chr19	45478590	45478687	-	2	-28.2	146.9	1.0021836734693874	34	0.043914680050188205	0.8021390374331551	-4.7357000000000005	0	62	active	0.848878328224	active	TRU-TCA1-1
Homo_sapiens	tRNA-SeC-TCA-2-1	chr22	44150657	44150725	+	2	-18.4	111.5	-0.009985294117647033	351	0.03125	0.3261122757978104	-0.59535	0	34	inactive	-0.646550967479	inactive	TRU-TCA2-1
Homo_sapiens	tRNA-Ser-AGA-1-1	chr6	27541774	27541856	-	9	-32.8	90.3	0.8502317073170733	100	0.020460358056265986	0.31542898341744774	-3.5757499999999993	3	10	active	0.850159186914	active	TRS-AGA1-1
Homo_sapiens	tRNA-Ser-AGA-2-1	chr6	26327588	26327670	+	9	-32.8	89.6	0.9839146341463414	8	0.026854219948849106	0.5718954248366013	-2.7094	5	40	active	0.985844366259	active	TRS-AGA2-1
Homo_sapiens	tRNA-Ser-AGA-2-2	chr6	27478811	27478893	+	9	-32.8	89.6	0.7956219512195116	5	0.04092071611253197	0.49157303370786515	-3.3104999999999998	1	15	active	0.983742788845	active	TRS-AGA2-2
Homo_sapiens	tRNA-Ser-AGA-2-3	chr6	27495813	27495895	+	9	-32.8	89.6	0.6492804878048778	6	0.043478260869565216	0.691699604743083	-3.58725	3	14	active	0.984703192728	active	TRS-AGA2-3
Homo_sapiens	tRNA-Ser-AGA-2-4	chr6	27503038	27503120	+	9	-32.8	89.6	0.5879146341463417	9	0.03836317135549872	0.7706639566395664	-2.55185	3	14	active	0.98427451774	active	TRS-AGA2-4
Homo_sapiens	tRNA-Ser-AGA-2-5	chr8	95269656	95269738	-	9	-32.8	89.6	1.4882352941176473	11	0.056265984654731455	0.6179775280898876	-0.77415	0	12	active	0.973462774065	active	TRS-AGA2-5
Homo_sapiens	tRNA-Ser-AGA-2-6	chr17	8226609	8226691	-	9	-32.8	89.6	1.417914634146343	5	0.04731457800511509	0.7653061224489796	-4.848149999999999	6	101	active	0.987774052315	active	TRS-AGA2-6
Homo_sapiens	tRNA-Ser-AGA-3-1	chr6	27532207	27532289	+	9	-32.8	87.2	0.837926829268293	123	0.021739130434782608	0.43555555555555553	-3.56375	1	11	active	0.935022412032	inactive	TRS-AGA3-1
Homo_sapiens	tRNA-Ser-AGA-4-1	chr6	27553412	27553494	-	9	-29.2	78.8	0.6659390243902437	7	0.029411764705882353	0.30991735537190085	-1.3303999999999998	3	4	active	0.836322169726	active	TRS-AGA4-1
Homo_sapiens	tRNA-Ser-CGA-1-1	chr17	8138880	8138962	-	4	-34.0	95.1	1.531588235294118	7	0.06010230179028133	0.8439429012345679	-0.8903000000000001	1	101	active	0.979099564744	active	TRS-CGA1-1
Homo_sapiens	tRNA-Ser-CGA-2-1	chr6	27209848	27209930	+	4	-34.0	94.0	0.6904512195121952	22	0.023017902813299233	0.06628787878787878	-1.85445	3	19	active	0.848140813136	active	TRS-CGA2-1
Homo_sapiens	tRNA-Ser-CGA-3-1	chr6	27672449	27672531	-	4	-31.8	94.6	-0.08428048780487815	6	0.0370843989769821	0.48785344484269216	-1.3118500000000002	3	7	active	0.878816637148	active	TRS-CGA3-1
Homo_sapiens	tRNA-Ser-CGA-4-1	chr12	56190363	56190445	+	4	-29.8	89.6	1.6165764705882353	2	0.05754475703324808	0.7093135959115341	-0.7500999999999999	0	151	active	0.961545264485	active	TRS-CGA4-1
Homo_sapiens	tRNA-Ser-GCT-1-1	chr6	27097305	27097387	+	8	-32.8	91.9	0.641695121951219	9	0.052429667519181586	1.003440366972477	-2.3061999999999996	1	11	active	0.978243177351	active	TRS-GCT1-1
Homo_sapiens	tRNA-Ser-GCT-2-1	chr6	27297995	27298077	+	8	-30.1	91.0	-0.0037560975609756157	4	0.030690537084398978	0.494949494949495	-3.4676315789473677	2	21	active	0.881371882262	active	TRS-GCT2-1
Homo_sapiens	tRNA-Ser-GCT-3-1	chr11	66348119	66348201	+	8	-30.7	89.1	1.6516235294117652	6	0.07800511508951406	1.1619693437875256	-2.04635	0	70	active	0.976625499081	active	TRS-GCT3-1
Homo_sapiens	tRNA-Ser-GCT-4-1	chr6	28597339	28597421	-	8	-30.7	88.4	0.925719512195122	10	0.023017902813299233	0.5636070853462157	-2.17235	2	24	active	0.9528974012	active	TRS-GCT4-1
Homo_sapiens	tRNA-Ser-GCT-4-2	chr15	40593824	40593906	-	8	-30.7	88.4	1.5368571428571436	14	0.0370843989769821	0.9105846912227852	-1.1761000000000001	0	37	active	0.985476257562	active	TRS-GCT4-2
Homo_sapiens	tRNA-Ser-GCT-4-3	chr17	8186865	8186947	+	8	-30.7	88.4	1.580666666666667	22	0.056265984654731455	0.7759784075573549	-2.2227999999999994	3	108	active	0.984340851174	active	TRS-GCT4-3
Homo_sapiens	tRNA-Ser-GCT-5-1	chr6	28213036	28213118	+	8	-30.7	85.2	0.9211341463414633	15	0.024296675191815855	0.6026170798898072	-3.0340999999999996	0	44	active	0.960022176667	active	TRS-GCT5-1
Homo_sapiens	tRNA-Ser-GCT-6-1	chr6	26305492	26305570	-	8	-23.5	71.6	1.0245641025641028	27	0.02699228791773779	0.1865671641791045	-1.57565	5	31	active	0.82486712944	active	TRS-GCT6-1
Homo_sapiens	tRNA-Ser-TGA-1-1	chr10	67764502	67764584	+	4	-34.9	94.0	1.5140574712643693	16	0.06010230179028133	1.0717566602021027	-2.4768499999999998	0	11	active	0.975367712468	active	TRS-TGA1-1
Homo_sapiens	tRNA-Ser-TGA-2-1	chr6	27545688	27545770	+	4	-32.8	90.4	0.4248292682926832	1	0.0370843989769821	0.7773713091194147	-2.6548000000000007	3	9	active	0.964488236101	active	TRS-TGA2-1
Homo_sapiens	tRNA-Ser-TGA-3-1	chr6	26312595	26312677	-	4	-32.8	89.7	1.3684024390243912	6	0.02557544757033248	0.39845173041894355	-3.33675	5	37	active	0.942711022644	active	TRS-TGA3-1
Homo_sapiens	tRNA-Ser-TGA-4-1	chr6	27505827	27505909	-	4	-30.0	84.0	0.12658536585365857	6	0.023017902813299233	0.0682261208576998	-2.3953999999999995	3	14	active	0.860262539461	active	TRS-TGA4-1
Homo_sapiens	tRNA-Thr-AGT-1-1	chr17	8187159	8187233	+	9	-27.3	82.6	0.716	17	0.041343669250646	0.6708407871198568	-4.03675	3	108	active	0.986283502617	active	TRT-AGT1-1
Homo_sapiens	tRNA-Thr-AGT-1-2	chr17	8226234	8226308	-	9	-27.3	82.6	1.361851351351352	22	0.03359173126614987	0.6936936936936937	-3.253750000000001	6	101	active	0.988249362821	active	TRT-AGT1-2
Homo_sapiens	tRNA-Thr-AGT-1-3	chr19	33177056	33177130	+	9	-27.3	82.6	1.6146756756756768	25	0.08914728682170543	0.8238636363636364	-1.6289000000000002	0	44	active	0.979965402178	active	TRT-AGT1-3
Homo_sapiens	tRNA-Thr-AGT-2-1	chr6	26532916	26532990	-	9	-27.0	81.4	1.6065405405405404	7	0.031007751937984496	0.6099078914612895	-3.5202999999999998	2	38	active	0.982552067387	active	TRT-AGT2-1
Homo_sapiens	tRNA-Thr-AGT-2-2	chr6	27684694	27684768	-	9	-27.0	81.4	0.5674324324324328	20	0.03617571059431524	0.8314855875831486	-2.6912999999999996	2	7	active	0.970273251395	active	TRT-AGT2-2
Homo_sapiens	tRNA-Thr-AGT-3-1	chr6	28726017	28726091	+	9	-26.8	80.7	0.12304054054054055	50	0.012919896640826873	0.17654476670870115	-2.1546	3	3	inactive	-0.733226403567	active	TRT-AGT3-1
Homo_sapiens	tRNA-Thr-AGT-4-1	chr6	27726693	27726767	+	9	-25.2	81.2	0.3014459459459461	207	0.016795865633074936	0.23046532045654083	-0.70825	1	10	inactive	-0.653940147467	inactive	TRT-AGT4-1
Homo_sapiens	tRNA-Thr-AGT-5-1	chr17	8139451	8139525	-	9	-27.3	80.1	1.3298243243243242	141	0.025839793281653745	0.24884464984002844	-3.8428499999999994	1	101	active	0.786185823653	active	TRT-AGT5-1
Homo_sapiens	tRNA-Thr-AGT-6-1	chr6	27162270	27162344	+	9	-27.8	80.6	1.4554459459459461	11	0.012919896640826873	0.34814323607427056	-2.3241000000000005	1	11	active	0.556049754064	active	TRT-AGT6-1
Homo_sapiens	tRNA-Thr-CGT-1-1	chr6	28488992	28489066	-	5	-23.7	78.4	0.8582702702702701	4	0.023255813953488372	0.985663082437276	-2.5665500000000003	0	24	active	0.955534669781	active	TRT-CGT1-1
Homo_sapiens	tRNA-Thr-CGT-2-1	chr16	14285892	14285964	+	5	-27.0	79.6	1.584847222222222	31	0.09326424870466321	1.0256410256410255	-0.0457	0	22	active	0.937847589223	active	TRT-CGT2-1
Homo_sapiens	tRNA-Thr-CGT-3-1	chr6	28648206	28648280	-	5	-25.8	77.1	1.0095405405405404	13	0.02454780361757106	0.6993006993006993	-2.8855000000000004	2	16	active	0.962439206537	active	TRT-CGT3-1
Homo_sapiens	tRNA-Thr-CGT-4-1	chr17	31550073	31550145	+	5	-27.3	78.3	1.306097222222222	38	0.11658031088082901	0.8421361502347418	0.0474500000000001	0	27	active	0.857198403988	active	TRT-CGT4-1
Homo_sapiens	tRNA-Thr-CGT-5-1	chr6	27618355	27618429	+	5	-26.2	66.2	0.6603783783783784	50	0.03359173126614987	0.3978779840848806	-1.8114000000000001	0	0	active	0.884909937683	active	TRT-CGT5-1
Homo_sapiens	tRNA-Thr-TGT-1-1	chr6	28474551	28474625	-	6	-24.9	83.3	0.85627027027027	5	0.014211886304909561	0.642791551882461	-2.7581499999999997	1	27	active	0.594106084686	active	TRT-TGT1-1
Homo_sapiens	tRNA-Thr-TGT-2-1	chr1	222465004	222465077	+	6	-29.1	84.1	0.48858904109589035	13	0.02199223803363519	0.3559623696923468	-3.0484	0	29	active	0.952466440637	active	TRT-TGT2-1
Homo_sapiens	tRNA-Thr-TGT-3-1	chr14	20613789	20613862	-	6	-29.4	80.0	1.3525479452054805	5	0.042690815006468305	0.6120826709062003	-3.5639499999999997	3	20	active	0.988866119126	active	TRT-TGT3-1
Homo_sapiens	tRNA-Thr-TGT-4-1	chr14	20631159	20631232	-	6	-29.7	78.8	0.29254794520547944	15	0.02457956015523933	0.5291005291005291	-3.732	2	22	active	0.962266817153	active	TRT-TGT4-1
Homo_sapiens	tRNA-Thr-TGT-5-1	chr14	20681689	20681762	+	6	-30.4	78.0	1.4848356164383574	27	0.03234152652005175	0.42424242424242425	-4.539050000000001	2	16	active	0.972275463593	active	TRT-TGT5-1
Homo_sapiens	tRNA-Thr-TGT-6-1	chr5	181191686	181191758	-	6	-29.7	75.7	1.5186250000000001	9	0.08937823834196891	1.0144927536231885	-3.6845	3	48	active	0.9891384033	active	TRT-TGT6-1
Homo_sapiens	tRNA-Trp-CCA-1-1	chr17	8220868	8220940	-	7	-24.5	73.4	1.1355694444444449	12	0.03238341968911917	0.6588235294117647	-3.6836000000000007	6	117	active	0.982631355467	active	TRW-CCA1-1
Homo_sapiens	tRNA-Trp-CCA-2-1	chr17	19508180	19508252	+	7	-25.1	75.1	1.3305555555555544	8	0.07512953367875648	0.8105604446503011	-2.3487	0	26	active	0.980164761023	active	TRW-CCA2-1
Homo_sapiens	tRNA-Trp-CCA-3-1	chr6	26319101	26319173	-	7	-25.1	73.3	0.7811388888888882	12	0.02461139896373057	0.47971491228070173	-2.67255	7	41	active	0.985370310156	active	TRW-CCA3-1
Homo_sapiens	tRNA-Trp-CCA-3-2	chr6	26331443	26331515	-	7	-25.1	73.3	1.2910555555555554	4	0.03238341968911917	0.7148692810457516	-2.72285	4	42	active	0.991626866799	active	TRW-CCA3-2
Homo_sapiens	tRNA-Trp-CCA-3-3	chr17	8186357	8186429	+	7	-25.1	73.3	1.5881666666666663	7	0.07124352331606218	0.6143162393162394	-1.7849999999999997	3	109	active	0.983808697545	active	TRW-CCA3-3
Homo_sapiens	tRNA-Trp-CCA-4-1	chr12	98504251	98504323	+	7	-25.1	74.3	1.620011904761905	3	0.042746113989637305	0.7478632478632479	0.4871	1	18	active	0.945584129321	active	TRW-CCA4-1
Homo_sapiens	tRNA-Trp-CCA-5-1	chr7	99469683	99469755	+	7	-25.1	68.8	0.4709027777777778	73	0.034974093264248704	0.5957446808510638	-1.6067	0	64	active	0.934011251938	active	TRW-CCA5-1
Homo_sapiens	tRNA-Tyr-ATA-1-1	chr2	218245825	218245918	+	1	-30.5	57.6	-0.018109589041095872	11	0.017654476670870115	0.25225225225225223	-0.42925	0	60	inactive	-0.544052692087	inactive	TRY-ATA1-1
Homo_sapiens	tRNA-Tyr-GTA-1-1	chr6	26568857	26568948	+	13	-29.8	77.9	1.607164383561644	8	0.03413400758533502	0.625993640699523	-3.58865	3	24	active	0.989269417154	active	TRY-GTA1-1
Homo_sapiens	tRNA-Tyr-GTA-2-1	chr2	27050781	27050870	+	13	-28.7	77.9	1.6776986301369865	12	0.049429657794676805	0.6698564593301436	-3.6598999999999995	1	86	active	0.988392809571	active	TRY-GTA2-1
Homo_sapiens	tRNA-Tyr-GTA-3-1	chr6	26577103	26577192	+	13	-28.3	77.5	0.6662191780821919	6	0.030418250950570342	0.7707364815267923	-1.9963000000000002	3	21	active	0.979684667861	active	TRY-GTA3-1
Homo_sapiens	tRNA-Tyr-GTA-4-1	chr14	20657463	20657557	-	13	-33.8	75.3	-0.20123287671232878	12	0.031486146095717885	0.354251012145749	-1.2358999999999996	3	18	active	0.76780870442	active	TRY-GTA4-1
Homo_sapiens	tRNA-Tyr-GTA-5-1	chr8	66113366	66113459	+	13	-30.5	75.3	0.8615342465753426	11	0.07187894073139975	0.9165731387953611	-2.9895500000000004	2	30	active	0.990279855341	active	TRY-GTA5-1
Homo_sapiens	tRNA-Tyr-GTA-5-2	chr8	66113987	66114076	+	13	-32.3	75.5	1.2509863013698632	21	0.06590621039290241	0.7692307692307693	-3.408499999999999	2	30	active	0.991938735064	active	TRY-GTA5-2
Homo_sapiens	tRNA-Tyr-GTA-5-3	chr14	20653098	20653192	-	13	-29.1	75.3	0.13689041095890409	12	0.03526448362720403	0.693069306930693	-1.39195	3	18	active	0.980722167269	active	TRY-GTA5-3
Homo_sapiens	tRNA-Tyr-GTA-5-4	chr14	20663191	20663285	-	13	-33.1	75.3	0.08769863013698627	12	0.03526448362720403	0.5401234567901234	-0.8103	3	18	active	0.951230668967	active	TRY-GTA5-4
Homo_sapiens	tRNA-Tyr-GTA-5-5	chr14	20683272	20683361	+	13	-29.4	75.5	1.0393287671232876	10	0.060836501901140684	0.7000700070007001	-4.03255	2	15	active	0.983622915711	active	TRY-GTA5-5
Homo_sapiens	tRNA-Tyr-GTA-6-1	chr6	26594873	26594962	+	13	-25.9	75.1	0.8031780821917804	6	0.022813688212927757	0.49603174603174605	-3.24275	0	19	active	0.974665348026	active	TRY-GTA6-1
Homo_sapiens	tRNA-Tyr-GTA-7-1	chr14	20659957	20660051	-	13	-33.2	74.3	0.29302739726027405	12	0.037783375314861464	0.5408015451472719	-0.6744	3	18	active	0.941729918133	active	TRY-GTA7-1
Homo_sapiens	tRNA-Tyr-GTA-8-1	chr6	26575569	26575659	+	13	-26.6	72.4	0.49890277777777775	6	0.016455696202531647	0.14938113529662825	-3.3307	3	23	inactive	-0.513831948956	inactive	TRY-GTA8-1
Homo_sapiens	tRNA-Tyr-GTA-9-1	chr8	65697296	65697384	-	13	-16.7	52.0	-0.042708333333333334	351	0.015228426395939087	0.0	0.026800000000000008	0	31	inactive	-0.943823606373	inactive	TRY-GTA9-1
Homo_sapiens	tRNA-Val-AAC-1-1	chr3	169772229	169772302	+	10	-24.7	79.4	1.6085890410958903	14	0.03492884864165589	0.6069013351829374	-5.683700000000002	0	35	active	0.990956611317	active	TRV-AAC1-1
Homo_sapiens	tRNA-Val-AAC-1-2	chr5	181164153	181164226	+	10	-24.7	79.4	0.0187534246575342	11	0.04657179818887452	0.49019607843137253	-1.2004999999999997	3	33	active	0.917175798976	active	TRV-AAC1-2
Homo_sapiens	tRNA-Val-AAC-1-3	chr5	181169609	181169682	+	10	-24.7	79.4	0.0187534246575342	11	0.050452781371280724	0.5482456140350878	-1.21965	3	39	active	0.921175798976	active	TRV-AAC1-3
Homo_sapiens	tRNA-Val-AAC-1-4	chr5	181218269	181218342	-	10	-24.7	79.4	0.7569589041095893	8	0.05304010349288486	0.7161125319693095	-3.7576500000000004	2	49	active	0.990750421984	active	TRV-AAC1-4
Homo_sapiens	tRNA-Val-AAC-1-5	chr6	27753399	27753472	-	10	-24.7	79.4	0.45128767123287655	11	0.042690815006468305	0.5251312828207052	-2.67845	0	16	active	0.986128813508	active	TRV-AAC1-5
Homo_sapiens	tRNA-Val-AAC-2-1	chr5	181188415	181188488	-	10	-24.7	79.4	0.04883561643835615	10	0.054333764553686936	0.6211180124223602	-3.8455500000000002	3	47	active	0.923410480258	active	TRV-AAC2-1
Homo_sapiens	tRNA-Val-AAC-3-1	chr6	27650927	27651000	-	10	-21.1	72.8	0.491849315068493	63	0.02199223803363519	0.0	-2.9027000000000003	0	6	active	0.709911715585	active	TRV-AAC3-1
Homo_sapiens	tRNA-Val-AAC-4-1	chr6	27681105	27681178	-	10	-20.3	69.2	0.323986301369863	201	0.04657179818887452	0.7383966244725738	-3.7771	3	7	active	0.909198823692	active	TRV-AAC4-1
Homo_sapiens	tRNA-Val-AAC-5-1	chr6	27235508	27235581	+	10	-16.8	67.0	0.06002739726027399	13	0.04398447606727038	0.8158508158508159	-1.3322999999999998	2	14	active	0.641231641738	active	TRV-AAC5-1
Homo_sapiens	tRNA-Val-AAC-6-1	chr6	28735428	28735500	-	10	-19.0	69.9	0.3836527777777776	66	0.018134715025906734	0.4596622889305816	-1.6311999999999998	3	1	active	0.612234133418	active	TRV-AAC6-1
Homo_sapiens	tRNA-Val-CAC-1-1	chr1	161399699	161399772	-	13	-24.7	79.4	1.1472465753424659	12	0.07632600258732213	0.702576112412178	-2.32005	0	14	active	0.9894733645	active	TRV-CAC1-1
Homo_sapiens	tRNA-Val-CAC-1-4	chr5	181173649	181173722	+	13	-24.7	79.4	0.13527397260273974	11	0.042690815006468305	0.41633624107850914	-1.6947999999999996	3	41	active	0.942360939875	active	TRV-CAC1-4
Homo_sapiens	tRNA-Val-CAC-1-5	chr5	181222394	181222467	-	13	-24.7	79.4	1.374424657534246	2	0.06727037516170763	0.7743362831858407	-3.13975	2	50	active	0.991821610633	active	TRV-CAC1-5
Homo_sapiens	tRNA-Val-CAC-1-6	chr6	26538053	26538126	+	13	-24.7	79.4	1.2953561643835612	2	0.062095730918499355	0.7621951219512195	-3.6772	2	35	active	0.988932198651	active	TRV-CAC1-6
Homo_sapiens	tRNA-Val-CAC-2-1	chr6	27280269	27280342	-	13	-25.6	80.5	0.10834246575342467	7	0.03492884864165589	0.461133069828722	-2.0211500000000004	2	18	active	0.980930607363	active	TRV-CAC2-1
Homo_sapiens	tRNA-Val-CAC-3-1	chr19	4724634	4724707	-	13	-22.6	79.2	0.21489041095890407	9	0.04139715394566624	0.6072435480373021	-2.7064499999999994	1	49	active	0.984737426299	active	TRV-CAC3-1
Homo_sapiens	tRNA-Val-CAC-4-1	chr1	143803993	143804066	-	13	-22.5	72.2	0.25057534246575336	4	0.04139715394566624	0.719294003868472	-3.1621000000000006	0	30	active	0.985770351847	active	TRV-CAC4-1
Homo_sapiens	tRNA-Val-CAC-5-1	chr1	121020728	121020801	-	13	-24.7	79.4	0.25057534246575336	4	0.04398447606727038	0.7305194805194806	-3.1793500000000003	0	28	active	0.989425197042	active	TRV-CAC5-1
Homo_sapiens	tRNA-Val-CAC-6-1	chr6	27206087	27206160	-	13	-19.2	63.1	0.5528904109589042	20	0.042690815006468305	0.6211180124223602	-1.94565	3	21	active	0.827470557665	active	TRV-CAC6-1
Homo_sapiens	tRNA-Val-TAC-1-1	chr11	59550628	59550701	-	5	-23.6	82.9	1.1199726027397259	17	0.055627425614489	0.898972602739726	-3.489099999999999	6	35	active	0.99022779958	active	TRV-TAC1-1
Homo_sapiens	tRNA-Val-TAC-1-2	chrX	18674908	18674981	-	5	-23.6	82.9	1.2971780821917813	17	0.0815006468305304	0.9293300653594772	-5.300050000000001	0	28	active	0.990976820492	active	TRV-TAC1-2
Homo_sapiens	tRNA-Val-TAC-2-1	chr11	59550986	59551059	-	5	-23.6	80.5	1.157013698630137	16	0.04398447606727038	0.7990867579908676	-3.4923499999999996	6	35	active	0.99069256974	active	TRV-TAC2-1
Homo_sapiens	tRNA-Val-TAC-3-1	chr10	5853710	5853783	-	5	-23.7	80.7	-0.09998630136986308	15	0.019404915912031046	0.33442533442533445	-1.0858499999999998	0	40	active	0.582583351448	inactive	TRV-TAC3-1
Homo_sapiens	tRNA-Val-TAC-4-1	chr6	27290625	27290698	+	5	-21.9	68.7	0.2286712328767123	8	0.03622250970245795	0.8076923076923077	-2.2512499999999998	2	19	active	0.973775420107	active	TRV-TAC4-1
Homo_sapiens	tRNA-iMet-CAT-1-1	chr1	153671249	153671321	+	20	-26.1	60.4	1.677375	6	0.04404145077720207	0.9510869565217391	-3.8915000000000006	0	81	active	0.986885534679	active	TRX-CAT1-1
Homo_sapiens	tRNA-iMet-CAT-1-2	chr6	26286525	26286597	+	20	-26.1	60.4	1.143472222222223	5	0.023316062176165803	0.5232558139534884	-4.432599999999999	0	21	active	0.980706863794	active	TRX-CAT1-2
Homo_sapiens	tRNA-iMet-CAT-1-3	chr6	26313123	26313195	-	20	-26.1	60.4	1.0879583333333334	14	0.03367875647668394	0.7225975975975976	-0.6787500000000001	6	38	active	0.956178593632	active	TRX-CAT1-3
Homo_sapiens	tRNA-iMet-CAT-1-4	chr6	26330300	26330372	-	20	-26.1	60.4	0.3823333333333336	7	0.019430051813471502	0.6818181818181818	-2.1564	4	41	active	0.951679970573	active	TRX-CAT1-4
Homo_sapiens	tRNA-iMet-CAT-1-5	chr6	27332984	27333056	-	20	-26.1	60.4	0.15527777777777774	4	0.034974093264248704	0.8739076154806492	-1.02615	1	17	active	0.965451048009	active	TRX-CAT1-5
Homo_sapiens	tRNA-iMet-CAT-1-6	chr6	27592820	27592892	-	20	-26.1	60.4	0.6871666666666664	8	0.029792746113989636	0.6225296442687747	-2.1502999999999997	3	2	active	0.951841672563	active	TRX-CAT1-6
Homo_sapiens	tRNA-iMet-CAT-1-7	chr6	27902492	27902564	-	20	-26.1	60.4	1.2709583333333339	0	0.01683937823834197	0.5501908825510892	-4.0024999999999995	1	16	active	0.6220362412	active	TRX-CAT1-7
Homo_sapiens	tRNA-iMet-CAT-1-8	chr17	82494720	82494792	-	20	-26.1	60.4	0.28981944444444446	9	0.022020725388601035	0.36424606845513413	-1.4767000000000001	0	48	active	0.774856759287	active	TRX-CAT1-8
Homo_sapiens	tRNA-iMet-CAT-2-1	chr6	27777884	27777956	+	20	-26.1	51.7	0.011277777777777763	11	0.014248704663212436	0.33875338753387535	-4.799947368421052	0	16	inactive	-0.810104367726	active	TRX-CAT2-1
