# Supplementary material for: Predicting transfer RNA gene activity from sequence and genome context
Source: HighWire-hosted journal article supplement (doi:10.1101/gr.256164.119), 2019-12-19
Supplement: Supplemental_Table_S4_.xlsx [file Supplemental_Table_S4_.xlsx]

## Sheet: S4
Supplemental Table S4: Our test set of 376 mouse tRNA genes are shown (GtRNAdb names) with their genomic locations, feature data, predictions by our model, probability scores for each prediction, and activity labels based on epigenomic data (Bogu et al. 2016).
species	tRNA	chr	start	end	strand	Total Number of tRNA Genes With Identical Anticodon	Minimum Free Energy of Canonical tRNA Secondary Structure	tRNAscan-SE General Bit Score	Average PhyloP Score in tRNA Gene Sequence	Distance To Nearest TTTT Transcription Termination Sequence	CpG Density Across tRNA Locus	Observed/Expected CpG Islands Score Upstream of tRNA Gene	Average PhyloP Score in 5' Flanking Region	tRNA Genes Within 10 Kilobases	Exons Within 75 Kilobases	Prediction	Probability	Experimental Data
Mus_musculus	tRNA-Ala-AGC-1-1	chr13	21242569	21242641	+	13	-30.4	85.3	0.284944444444	52	0.0181347150259	0.225806451613	-0.60235	3	31	active	0.560250345	active
Mus_musculus	tRNA-Ala-AGC-2-1	chr13	21222585	21222657	+	13	-31.9	84.7	0.285458333333	1	0.0336787564767	0.528846153846	-0.75295	1	28	active	0.967825871	active
Mus_musculus	tRNA-Ala-AGC-2-2	chr13	21234044	21234116	+	13	-31.9	84.7	0.952916666667	3	0.0375647668394	0.688202247191	-3.7467	2	28	active	0.98717194	active
Mus_musculus	tRNA-Ala-AGC-3-1	chr13	21259767	21259839	+	13	-27.0	83.6	0.299888888889	3	0.0323834196891	0.554047942108	-0.7652	3	27	active	0.975584383	active
Mus_musculus	tRNA-Ala-AGC-4-1	chr3	19628994	19629067	+	13	-32.0	59.7	1.60482191781	7	0.0595084087969	1.02525252525	-1.27035	3	20	active	0.970721873	active
Mus_musculus	tRNA-Ala-AGC-4-2	chr5	30888514	30888587	+	13	-32.0	59.7	1.55695890411	5	0.0478654592497	0.548374461418	-2.51765	1	97	active	0.980917138	active
Mus_musculus	tRNA-Ala-AGC-5-1	chr13	23285648	23285721	+	13	-30.5	59.3	0.202657534247	1	0.0336351875809	0.73277502855	-1.10195	1	18	active	0.962711833	active
Mus_musculus	tRNA-Ala-AGC-5-2	chr13	23299060	23299133	+	13	-30.5	59.3	0.139178082192	123	0.0323415265201	0.568797399783	-0.3997	4	21	active	0.824374378	active
Mus_musculus	tRNA-Ala-AGC-5-3	chr13	23400794	23400867	-	13	-30.5	59.3	0.194082191781	4	0.0245795601552	0.972222222222	-1.02684210526	2	28	active	0.912473447	active
Mus_musculus	tRNA-Ala-AGC-6-1	chr13	23431411	23431484	+	13	-29.6	58.9	0.28095890411	1	0.0245795601552	0.154457193292	-0.3827	9	37	active	0.581348065	active
Mus_musculus	tRNA-Ala-AGC-7-1	chr19	3576262	3576335	+	13	-27.7	54.6	0.780547945205	8	0.0388098318241	0.876906318083	-2.1836	0	28	active	0.758943257	active
Mus_musculus	tRNA-Ala-AGC-8-1	chr4	132516007	132516079	+	13	-18.2	57.5	0.0	0	0.0220207253886	0.385948330183	-0.03785	0	28	inactive	-0.746513684	active
Mus_musculus	tRNA-Ala-AGC-10-1	chr13	23412940	23413013	-	13	-24.5	52.7	0.198260273973	98	0.0336351875809	0.777489818586	-1.26653333333	2	36	active	0.709481853	active
Mus_musculus	tRNA-Ala-CGC-1-1	chr13	21254219	21254291	+	10	-26.5	79.7	0.209819444444	4	0.0272020725389	0.595975232198	-1.0157	2	31	active	0.951420535	active
Mus_musculus	tRNA-Ala-CGC-1-2	chr13	23438696	23438768	-	10	-26.5	79.7	1.39041666667	5	0.020725388601	0.310146211786	-3.90875	8	34	active	0.875356837	active
Mus_musculus	tRNA-Ala-CGC-2-1	chr2	57182077	57182149	+	10	-27.6	74.4	1.63155555556	16	0.0466321243523	0.688374125874	-2.4309	1	25	active	0.987567121	active
Mus_musculus	tRNA-Ala-CGC-3-3	chrX	136401867	136401939	+	10	-27.4	64.5	0.0	4	0.0155440414508	0.2734375	0.0	2	12	inactive	-0.703178444	inactive
Mus_musculus	tRNA-Ala-CGC-4-1	chrX	136367720	136367792	+	10	-23.1	63.6	0.0	4	0.0103626943005	0.147058823529	0.0	0	2	inactive	-0.84538422	inactive
Mus_musculus	tRNA-Ala-CGC-5-1	chr4	132125258	132125330	+	10	-17.2	58.7	?	6	0.0129533678756	0.291666666667	?	0	8	inactive	-0.792104863	inactive
Mus_musculus	tRNA-Ala-CGC-6-1	chrX	136567864	136567936	-	10	-22.5	56.6	0.0	4	0.0116580310881	0.234270414993	0.0	2	15	inactive	-0.856567239	inactive
Mus_musculus	tRNA-Ala-CGC-7-1	chrX	136569762	136569835	+	10	-20.2	57.4	0.0	4	0.012936610608	0.234741784038	0.0	2	15	inactive	-0.871576179	inactive
Mus_musculus	tRNA-Ala-TGC-1-1	chr13	21240944	21241016	+	11	-30.5	84.9	0.270916666667	6	0.0194300518135	0.42735042735	-0.2742	3	30	active	0.794677787	inactive
Mus_musculus	tRNA-Ala-TGC-2-1	chr5	125404249	125404321	-	11	-26.5	79.7	1.30331944444	3	0.0284974093264	0.649350649351	-2.9653	4	46	active	0.987874505	active
Mus_musculus	tRNA-Ala-TGC-3-1	chr11	48834428	48834500	-	11	-26.5	79.7	0.269736111111	17	0.0284974093264	0.360824742268	-0.8752	1	47	active	0.776690885	active
Mus_musculus	tRNA-Ala-TGC-4-1	chr5	125409471	125409543	+	11	-26.5	78.7	0.280277777778	2	0.0233160621762	0.600686498856	-0.54295	4	48	active	0.8809168	active
Mus_musculus	tRNA-Ala-TGC-5-1	chrX	136380746	136380818	+	11	-27.5	73.8	0.0	4	0.0194300518135	0.574308485701	0.0	1	7	active	0.650759593	inactive
Mus_musculus	tRNA-Ala-TGC-5-2	chrX	136396903	136396975	+	11	-27.5	73.8	0.0	4	0.0194300518135	0.493421052632	0.0	2	12	active	0.669206023	inactive
Mus_musculus	tRNA-Ala-TGC-5-3	chrX	136569245	136569317	+	11	-27.5	73.8	?	3	0.0142487046632	0.347567030785	?	2	15	inactive	-0.544813265	inactive
Mus_musculus	tRNA-Ala-TGC-6-1	chrX	136590364	136590436	+	11	-27.4	69.9	-0.0315555555556	5	0.0129533678756	0.254175744372	-0.58495	0	15	inactive	-0.753499105	active
Mus_musculus	tRNA-Ala-TGC-7-1	chrX	136430364	136430436	-	11	-25.3	72.9	-0.0812222222222	12	0.00906735751295	0.233333333333	-0.4935	0	13	inactive	-0.863402165	inactive
Mus_musculus	tRNA-Ala-TGC-7-2	chrX	136553724	136553796	+	11	-25.3	72.9	-0.0468055555556	12	0.00906735751295	0.24049473202	-0.4938	0	17	inactive	-0.83103724	inactive
Mus_musculus	tRNA-Ala-TGC-8-1	chrX	136357601	136357673	+	11	-25.3	71.9	0.0	4	0.0103626943005	0.300343249428	0.0	0	1	inactive	-0.753179472	inactive
Mus_musculus	tRNA-Arg-ACG-1-1	chr13	23446791	23446864	-	6	-25.4	67.6	0.458136986301	13	0.025873221216	0.443937087773	-0.08045	6	32	active	0.862808256	active
Mus_musculus	tRNA-Arg-ACG-1-2	chr13	23500521	23500594	-	6	-25.4	67.6	0.876219178082	4	0.0116429495472	0.140901771337	-2.2545	5	41	inactive	-0.604690916	inactive
Mus_musculus	tRNA-Arg-ACG-1-3	chr14	54517695	54517768	+	6	-25.4	67.6	1.54480821918	62	0.0401034928849	0.76563587551	-3.23635	0	58	active	0.955495377	active
Mus_musculus	tRNA-Arg-ACG-2-1	chr3	19627958	19628031	-	6	-23.7	67.5	0.283273972603	3	0.0413971539457	0.76110593352	-0.513	3	19	active	0.939097216	active
Mus_musculus	tRNA-Arg-ACG-3-1	chr9	123529424	123529497	-	6	-23.1	64.2	1.47034246575	12	0.0698576972833	0.932601880878	-3.2659	0	41	active	0.986264973	active
Mus_musculus	tRNA-Arg-ACG-3-2	chr13	22021143	22021216	-	6	-23.1	64.2	0.283917808219	10	0.0219922380336	0.353535353535	-0.3053	5	25	active	0.710949814	active
Mus_musculus	tRNA-Arg-CCG-1-1	chr13	21215457	21215530	-	3	-27.1	67.0	0.412534246575	6	0.0271668822768	0.597473540457	-0.21125	1	25	active	0.840145646	active
Mus_musculus	tRNA-Arg-CCG-2-1	chr17	23550262	23550335	-	3	-26.3	64.1	1.31363013699	14	0.0297542043984	0.399657436483	-5.1303	4	31	active	0.934675688	active
Mus_musculus	tRNA-Arg-CCG-3-1	chr11	107012865	107012938	+	3	-29.0	64.9	1.62410958904	12	0.0478654592497	0.965707528577	0.2686	0	51	active	0.928023392	active
Mus_musculus	tRNA-Arg-CCT-1-1	chr11	115412980	115413053	+	5	-32.1	72.3	0.284602739726	10	0.0426908150065	0.940860215054	-0.0498	2	82	active	0.957051222	active
Mus_musculus	tRNA-Arg-CCT-2-1	chr11	115413303	115413376	-	5	-32.1	71.1	0.301301369863	12	0.0556274256145	0.999619192688	-0.01145	2	82	active	0.958189297	active
Mus_musculus	tRNA-Arg-CCT-3-1	chr17	23548767	23548840	-	5	-30.6	71.7	0.439726027397	8	0.0401034928849	0.923611111111	-0.8491	4	31	active	0.981899461	active
Mus_musculus	tRNA-Arg-CCT-4-1	chr6	38533930	38534003	+	5	-27.2	65.6	1.6222739726	5	0.0426908150065	0.859247135843	-1.37835	0	34	active	0.979209169	active
Mus_musculus	tRNA-Arg-TCG-1-1	chr7	79466418	79466491	+	5	-29.2	74.8	1.54321917808	12	0.0905562742561	1.04719162247	-3.1529	0	79	active	0.982308937	active
Mus_musculus	tRNA-Arg-TCG-2-1	chr11	115413778	115413851	+	5	-25.9	68.8	0.299410958904	5	0.0452781371281	0.914480956688	-0.73285	2	83	active	0.969307152	active
Mus_musculus	tRNA-Arg-TCG-3-1	chr13	21279695	21279768	+	5	-23.7	65.5	0.419931506849	3	0.0297542043984	0.830457290768	-0.56365	1	22	active	0.912565286	active
Mus_musculus	tRNA-Arg-TCG-3-2	chr13	23503979	23504052	-	5	-23.7	65.5	0.280808219178	11	0.0168175937904	0.334208641681	-0.40625	5	40	inactive	-0.608412967	inactive
Mus_musculus	tRNA-Arg-TCG-4-1	chr13	23526455	23526528	-	5	-23.7	64.3	0.232808219178	6	0.0349288486417	0.621890547264	-0.27485	7	40	active	0.927391118	active
Mus_musculus	tRNA-Arg-TCT-1-1	chr3	122292947	122293032	-	5	-30.7	71.1	1.56482191781	5	0.087898089172	0.973913043478	0.72825	0	34	active	0.972811628	active
Mus_musculus	tRNA-Arg-TCT-2-1	chr11	69123481	69123568	-	5	-24.3	70.8	1.48410958904	1	0.0330368487929	0.695364238411	-0.25965	4	90	active	0.9431153	active
Mus_musculus	tRNA-Arg-TCT-3-1	chr19	12011587	12011673	-	5	-30.4	70.3	0.299821917808	1	0.0508905852417	0.865033311842	-0.3154	7	29	active	0.958316371	active
Mus_musculus	tRNA-Arg-TCT-4-1	chr1	173390328	173390402	+	5	-25.5	75.1	1.57885135135	19	0.0206718346253	0.25641025641	1.46685	0	31	active	0.664243039	active
Mus_musculus	tRNA-Arg-TCT-5-1	chr13	21917161	21917247	-	5	-29.8	70.7	0.284054794521	6	0.0216284987277	0.47138047138	-0.6719	7	17	active	0.897145276	active
Mus_musculus	tRNA-Asn-GTT-1-1	chr3	96334614	96334688	-	13	-27.9	81.6	?	54	0.0413436692506	0.372340425532	?	3	29	active	0.874591533	active
Mus_musculus	tRNA-Asn-GTT-2-1	chr3	96322073	96322147	+	13	-26.4	80.8	0.0507567567568	9	0.0322997416021	0.367213114754	-1.59705	0	31	active	0.826262592	active
Mus_musculus	tRNA-Asn-GTT-3-1	chr1	171033941	171034015	-	13	-26.4	80.9	1.1242972973	9	0.0400516795866	0.721500721501	-4.40155	3	30	active	0.988933096	active
Mus_musculus	tRNA-Asn-GTT-3-2	chr2	18587043	18587117	-	13	-26.4	80.9	1.41031081081	7	0.0245478036176	0.249287749288	-3.3611	0	3	active	0.867034646	active
Mus_musculus	tRNA-Asn-GTT-3-3	chr3	96402217	96402291	+	13	-26.4	80.9	0.171621621622	4	0.0542635658915	0.94642555349	-0.04755	2	37	active	0.933353648	active
Mus_musculus	tRNA-Asn-GTT-3-6	chr3	96497780	96497854	+	13	-26.4	80.9	0.300432432432	5	0.0297157622739	0.585984214303	-0.45945	4	34	active	0.899452549	active
Mus_musculus	tRNA-Asn-GTT-3-7	chr5	149229000	149229074	-	13	-26.4	80.9	1.24016216216	10	0.062015503876	0.878844946642	-1.96005	0	26	active	0.986081957	active
Mus_musculus	tRNA-Asn-GTT-3-8	chr10	80249158	80249232	+	13	-26.4	80.9	0.661459459459	11	0.0684754521964	1.02198557197	-1.2519	1	89	active	0.98132154	active
Mus_musculus	tRNA-Asn-GTT-3-9	chr11	97702448	97702522	-	13	-26.4	80.9	1.57564864865	9	0.0452196382429	0.671936758893	-1.94755	0	75	active	0.986464858	active
Mus_musculus	tRNA-Asn-GTT-4-1	chr15	16275949	16276023	-	13	-22.5	61.0	-0.116	15	0.0142118863049	0.224358974359	-0.7191	0	0	inactive	-0.892844619	inactive
Mus_musculus	tRNA-Asn-GTT-5-1	chr3	96334970	96335044	+	13	-18.5	55.5	0.0690945945946	12	0.031007751938	0.555555555556	0.0014	3	29	active	0.516831669	active
Mus_musculus	tRNA-Asp-GTC-1-1	chr1	171037028	171037100	-	16	-26.4	66.5	0.301527777778	9	0.0284974093264	0.548589341693	-0.6479	4	28	active	0.904415367	active
Mus_musculus	tRNA-Asp-GTC-1-2	chr1	171065357	171065429	-	16	-26.4	66.5	0.301527777778	11	0.0997409326425	0.916988416988	-0.37945	9	34	active	0.827705241	active
Mus_musculus	tRNA-Asp-GTC-1-5	chr1	171102370	171102442	+	16	-26.4	66.5	0.287041666667	10	0.0621761658031	0.733024691358	-0.5757	4	43	active	0.945165316	active
Mus_musculus	tRNA-Asp-GTC-1-6	chr5	125405606	125405678	-	16	-26.4	66.5	1.49658333333	11	0.0414507772021	0.846153846154	-1.43005	4	46	active	0.985017305	active
Mus_musculus	tRNA-Asp-GTC-1-7	chr5	125409015	125409087	-	16	-26.4	66.5	0.273541666667	11	0.0336787564767	0.515843773029	-0.7716	4	47	active	0.974217071	active
Mus_musculus	tRNA-Asp-GTC-1-8	chr10	93452977	93453049	-	16	-26.4	66.5	1.59401388889	12	0.0375647668394	0.649275362319	-2.61805	0	47	active	0.987623421	active
Mus_musculus	tRNA-Asp-GTC-1-9	chr11	7869776	7869848	+	16	-26.4	66.5	?	11	0.0401554404145	0.12987012987	?	0	0	active	0.652220526	inactive
Mus_musculus	tRNA-Asp-GTC-1-10	chr11	69040983	69041055	+	16	-26.4	66.5	0.284944444444	6	0.0440414507772	0.815850815851	-0.44495	6	117	active	0.944197391	active
Mus_musculus	tRNA-Asp-GTC-1-11	chr13	21911312	21911384	+	16	-26.4	66.5	0.0623194444444	16	0.029792746114	0.796112489661	-0.7496	6	17	active	0.827162474	active
Mus_musculus	tRNA-Asp-GTC-1-12	chr13	21935496	21935568	-	16	-26.4	66.5	0.116208333333	12	0.0181347150259	0.511695906433	-1.0237	6	29	active	0.85435105	inactive
Mus_musculus	tRNA-Asp-GTC-1-13	chr13	21940318	21940390	-	16	-26.4	66.5	0.140569444444	11	0.0259067357513	0.69594034797	-0.7699	5	29	active	0.945189592	active
Mus_musculus	tRNA-Asp-GTC-2-1	chr10	91182096	91182168	-	16	-26.4	65.4	1.02919444444	8	0.059585492228	0.410798122066	-3.93765	1	24	active	0.960557217	active
Mus_musculus	tRNA-Asp-GTC-3-1	chr2	114103366	114103438	+	16	-21.0	52.2	0.0	12	0.0194300518135	0.239234449761	-0.04845	0	51	inactive	-0.835067321	inactive
Mus_musculus	tRNA-Asp-GTC-4-1	chr5	100992873	100992945	-	16	-14.7	51.4	?	351	0.0194300518135	0.271844660194	-0.455	0	2	inactive	-0.714931666	inactive
Mus_musculus	tRNA-Cys-GCA-1-1	chr9	104404055	104404127	+	54	-24.6	81.8	1.28461111111	9	0.00518134715026	0.133485888635	-1.61085	2	7	inactive	-0.758832274	inactive
Mus_musculus	tRNA-Cys-GCA-1-2	chr17	71599270	71599342	+	54	-24.6	81.8	0.225208333333	8	0.0284974093264	0.509518477044	-0.85265	0	50	active	0.866594588	active
Mus_musculus	tRNA-Cys-GCA-2-1	chr11	97798905	97798977	-	54	-23.9	81.8	1.51483333333	7	0.0349740932642	0.584762753397	-1.7814	1	47	active	0.969399238	active
Mus_musculus	tRNA-Cys-GCA-3-1	chr6	47978996	47979068	+	54	-26.1	81.9	0.448597222222	26	0.00906735751295	0.0934829059829	-1.4358	0	30	inactive	-0.796709351	inactive
Mus_musculus	tRNA-Cys-GCA-3-2	chr11	97797071	97797143	+	54	-26.1	81.9	1.32444444444	15	0.0168393782383	0.630144032922	-3.36775	1	48	active	0.754505751	inactive
Mus_musculus	tRNA-Cys-GCA-3-3	chr11	97988245	97988317	-	54	-26.1	81.9	1.537375	13	0.0388601036269	0.788510278795	-2.2375	1	58	active	0.961001406	active
Mus_musculus	tRNA-Cys-GCA-3-4	chr11	97988922	97988994	-	54	-26.1	81.9	1.52791666667	23	0.0284974093264	0.20325203252	-4.13805	1	58	active	0.711110234	active
Mus_musculus	tRNA-Cys-GCA-4-1	chr6	48133936	48134008	+	54	-24.6	77.2	0.340263888889	62	0.00129533678756	0.0507246376812	-1.7306	2	18	inactive	-0.896132804	inactive
Mus_musculus	tRNA-Cys-GCA-4-3	chr6	48154713	48154785	+	54	-24.6	77.2	0.173166666667	12	0.00259067357513	0.0377155172414	-0.00525	4	15	inactive	-0.929589275	inactive
Mus_musculus	tRNA-Cys-GCA-4-5	chr6	48160178	48160250	+	54	-24.6	77.2	0.191236111111	12	0.00647668393782	0.0744997871435	-0.00525	3	12	inactive	-0.931076454	inactive
Mus_musculus	tRNA-Cys-GCA-4-6	chr6	48164100	48164172	+	54	-24.6	77.2	0.191236111111	11	0.0	0.0	-0.0703	3	11	inactive	-0.935983282	inactive
Mus_musculus	tRNA-Cys-GCA-4-7	chr6	48197025	48197097	+	54	-24.6	77.2	0.208986111111	12	0.00906735751295	0.107493857494	-0.06945	1	13	inactive	-0.937058601	inactive
Mus_musculus	tRNA-Cys-GCA-4-8	chr6	48207450	48207522	-	54	-24.6	77.2	0.318569444444	2	0.00388601036269	0.063051702396	-0.2541	2	12	inactive	-0.8753479	inactive
Mus_musculus	tRNA-Cys-GCA-4-9	chr6	48223093	48223165	-	54	-24.6	77.2	0.318444444444	11	0.0	0.0	-0.33895	1	9	inactive	-0.950531607	inactive
Mus_musculus	tRNA-Cys-GCA-4-10	chr6	48244315	48244387	-	54	-24.6	77.2	0.251375	12	0.00259067357513	0.0714577378522	-0.44375	2	11	inactive	-0.945470714	inactive
Mus_musculus	tRNA-Cys-GCA-4-11	chr6	48252102	48252174	-	54	-24.6	77.2	0.339069444444	12	0.00129533678756	0.0543900543901	-1.68115	3	11	inactive	-0.912498614	inactive
Mus_musculus	tRNA-Cys-GCA-4-12	chr6	48261721	48261793	-	54	-24.6	77.2	0.0	10	0.0	0.0	-0.38355	3	11	inactive	-0.916541463	inactive
Mus_musculus	tRNA-Cys-GCA-4-13	chr6	48268457	48268529	-	54	-24.6	77.2	?	11	0.00129533678756	0.0	?	3	12	inactive	-0.929713935	inactive
Mus_musculus	tRNA-Cys-GCA-4-14	chr6	48271925	48271997	+	54	-24.6	77.2	?	11	0.00129533678756	0.0418460066954	?	3	12	inactive	-0.930905771	inactive
Mus_musculus	tRNA-Cys-GCA-4-15	chr6	48273679	48273751	+	54	-24.6	77.2	0.340263888889	227	0.00388601036269	0.0982042648709	-1.7102	3	12	inactive	-0.898381006	inactive
Mus_musculus	tRNA-Cys-GCA-4-16	chr6	48279770	48279842	-	54	-24.6	77.2	?	12	0.00647668393782	0.171128223934	?	3	12	inactive	-0.937978932	inactive
Mus_musculus	tRNA-Cys-GCA-4-17	chr6	48297432	48297504	+	54	-24.6	77.2	0.222652777778	12	0.00388601036269	0.109375	0.09465	6	11	inactive	-0.925519563	inactive
Mus_musculus	tRNA-Cys-GCA-4-18	chr6	48298949	48299021	-	54	-24.6	77.2	0.172986111111	11	0.00647668393782	0.0783699059561	0.05925	6	11	inactive	-0.928719563	inactive
Mus_musculus	tRNA-Cys-GCA-4-19	chr6	48309706	48309778	-	54	-24.6	77.2	0.231347222222	12	0.00259067357513	0.0822368421053	-1.0683	7	12	inactive	-0.922757908	inactive
Mus_musculus	tRNA-Cys-GCA-4-20	chr6	48313017	48313089	-	54	-24.6	77.2	0.191319444444	12	0.00259067357513	0.040425040425	-0.0941	6	12	inactive	-0.927954232	inactive
Mus_musculus	tRNA-Cys-GCA-4-21	chr6	48317514	48317586	+	54	-24.6	77.2	0.255708333333	13	0.00388601036269	0.179303278689	-0.2322	4	12	inactive	-0.940816281	inactive
Mus_musculus	tRNA-Cys-GCA-4-22	chr6	48332839	48332911	-	54	-24.6	77.2	0.128416666667	13	0.0168393782383	0.0	0.12365	4	19	inactive	-0.816226176	inactive
Mus_musculus	tRNA-Cys-GCA-4-23	chr6	48336107	48336179	-	54	-24.6	77.2	0.310916666667	20	0.00388601036269	0.0507982583454	-1.78145	4	22	inactive	-0.896337483	inactive
Mus_musculus	tRNA-Cys-GCA-4-24	chr6	48337090	48337162	-	54	-24.6	77.2	0.191097222222	9	0.00518134715026	0.0780553077609	-0.1234	4	23	inactive	-0.920810597	inactive
Mus_musculus	tRNA-Cys-GCA-4-25	chr6	48349761	48349833	-	54	-24.6	77.2	0.191138888889	13	0.00259067357513	0.11047979798	0.05845	5	30	inactive	-0.915098229	inactive
Mus_musculus	tRNA-Cys-GCA-4-26	chr6	48354018	48354090	-	54	-24.6	77.2	0.231347222222	12	0.00259067357513	0.0826446280992	-1.0683	4	30	inactive	-0.920224127	inactive
Mus_musculus	tRNA-Cys-GCA-4-27	chr6	48355854	48355926	+	54	-24.6	77.2	0.205972222222	351	0.00259067357513	0.0527664706769	0.09465	4	30	inactive	-0.922810753	inactive
Mus_musculus	tRNA-Cys-GCA-4-28	chr6	48363531	48363603	-	54	-24.6	77.2	0.339069444444	221	0.00259067357513	0.0972222222222	-1.68115	3	31	inactive	-0.885449138	inactive
Mus_musculus	tRNA-Cys-GCA-4-29	chr9	104400119	104400191	+	54	-24.6	77.2	1.28952777778	12	0.00906735751295	0.274187230709	-1.10955	2	8	inactive	-0.850831637	inactive
Mus_musculus	tRNA-Cys-GCA-5-1	chr11	97769828	97769900	-	54	-23.9	77.1	0.940416666667	5	0.00388601036269	0.0569846955389	-3.05565	0	55	inactive	-0.839130391	inactive
Mus_musculus	tRNA-Cys-GCA-6-1	chr6	48293006	48293078	-	54	-24.6	78.7	0.191097222222	12	0.0	0.0	0.05925	4	12	inactive	-0.927384618	inactive
Mus_musculus	tRNA-Cys-GCA-7-1	chr6	48209837	48209909	-	54	-26.1	77.3	0.430680555556	2	0.00259067357513	0.0	0.1214	2	11	inactive	-0.88803806	inactive
Mus_musculus	tRNA-Cys-GCA-8-1	chr6	48224328	48224400	-	54	-25.1	77.1	0.298430555556	3	0.00647668393782	0.0566801619433	-0.176	1	9	inactive	-0.888956881	inactive
Mus_musculus	tRNA-Cys-GCA-9-1	chr6	48303464	48303536	+	54	-23.7	72.8	0.0858550724638	13	0.00388601036269	0.176411290323	0.0569	8	12	inactive	-0.919202931	inactive
Mus_musculus	tRNA-Cys-GCA-10-1	chr6	48340612	48340684	+	54	-23.4	69.8	0.131208333333	351	0.0	0.0	0.09465	5	29	inactive	-0.911252263	inactive
Mus_musculus	tRNA-Cys-GCA-11-1	chr6	48288875	48288947	-	54	-21.8	68.7	?	10	0.00906735751295	0.448717948718	?	3	12	inactive	-0.551564533	inactive
Mus_musculus	tRNA-Cys-GCA-12-1	chr6	48253079	48253151	-	54	-16.6	72.6	0.141361111111	12	0.0	0.0	-1.0683	3	11	inactive	-0.929816369	inactive
Mus_musculus	tRNA-Cys-GCA-13-1	chr6	48356850	48356922	+	54	-22.1	66.7	0.233044776119	13	0.00259067357513	0.0620567375887	-0.180846153846	4	30	inactive	-0.930259522	inactive
Mus_musculus	tRNA-Cys-GCA-14-1	chr6	48143355	48143427	+	54	-18.0	69.4	0.191236111111	12	0.00388601036269	0.0385250412768	-0.02755	3	14	inactive	-0.935107886	inactive
Mus_musculus	tRNA-Cys-GCA-15-1	chr6	48308728	48308800	-	54	-17.4	66.5	0.283875	20	0.00518134715026	0.0500285877644	-1.77675	8	12	inactive	-0.913507672	inactive
Mus_musculus	tRNA-Cys-GCA-16-1	chr6	48139509	48139581	-	54	-21.7	67.5	0.222277777778	13	0.00647668393782	0.194660734149	-0.2933	3	18	inactive	-0.937114733	inactive
Mus_musculus	tRNA-Cys-GCA-17-1	chr6	48311498	48311570	+	54	-20.9	67.8	0.1775	12	0.00388601036269	0.0549882168107	0.09465	7	12	inactive	-0.935815822	inactive
Mus_musculus	tRNA-Cys-GCA-18-1	chr6	48305463	48305535	-	54	-20.8	63.5	0.191319444444	13	0.00129533678756	0.050417747047	0.1229	8	12	inactive	-0.935663648	inactive
Mus_musculus	tRNA-Cys-GCA-19-1	chr6	48186317	48186389	+	54	-23.9	65.2	0.399930555556	11	0.00129533678756	0.0	-0.264631578947	0	13	inactive	-0.948287649	inactive
Mus_musculus	tRNA-Cys-GCA-21-1	chr6	48302458	48302530	+	54	-18.7	59.6	0.222652777778	351	0.00259067357513	0.0545426211625	0.09465	8	12	inactive	-0.918931954	inactive
Mus_musculus	tRNA-Cys-GCA-24-1	chr6	48341587	48341659	+	54	-19.7	60.7	0.190430555556	3	0.0103626943005	0.117469374056	-0.0951	5	29	inactive	-0.860772575	inactive
Mus_musculus	tRNA-Cys-GCA-25-1	chr6	48205067	48205139	+	54	-20.4	57.3	0.359333333333	12	0.0	0.0	-0.94375	3	14	inactive	-0.934584	inactive
Mus_musculus	tRNA-Gln-CTG-1-1	chr13	21920199	21920271	+	10	-24.5	73.6	0.212430555556	9	0.0155440414508	0.394144144144	-1.0305	6	17	inactive	-0.566053758	active
Mus_musculus	tRNA-Gln-CTG-2-1	chr9	64738045	64738117	+	10	-24.7	71.5	1.50597222222	6	0.029792746114	0.671717171717	-2.547	0	36	active	0.986892516	active
Mus_musculus	tRNA-Gln-CTG-2-2	chr11	69124606	69124678	-	10	-24.7	71.5	1.46143055556	5	0.0181347150259	0.629779577148	-4.4753	4	88	active	0.94322152	active
Mus_musculus	tRNA-Gln-CTG-2-3	chr13	21172350	21172422	+	10	-24.7	71.5	0.298361111111	2	0.0155440414508	0.405092592593	-0.95345	6	22	active	0.531579482	active
Mus_musculus	tRNA-Gln-CTG-2-4	chr13	21933960	21934032	-	10	-24.7	71.5	0.281986111111	6	0.029792746114	0.540730337079	-0.3961	7	27	active	0.903296681	active
Mus_musculus	tRNA-Gln-CTG-3-1	chr3	96341155	96341227	-	10	-24.2	71.1	0.171041666667	27	0.0246113989637	0.239234449761	-0.9942	5	29	active	0.720653665	active
Mus_musculus	tRNA-Gln-CTG-3-2	chr3	96399058	96399130	-	10	-24.2	71.1	0.17	15	0.0155440414508	0.266971777269	-0.33965	1	37	inactive	-0.762190217	active
Mus_musculus	tRNA-Gln-CTG-3-3	chr3	96479390	96479462	+	10	-24.2	71.1	0.172652777778	28	0.0142487046632	0.200152497141	-0.578666666667	0	23	inactive	-0.86105963	inactive
Mus_musculus	tRNA-Gln-CTG-4-1	chr3	97681458	97681530	+	10	-24.2	71.1	0.276666666667	25	0.0453367875648	0.730784288138	-0.5606	0	68	active	0.941191794	active
Mus_musculus	tRNA-Gln-CTG-5-1	chr13	21996580	21996652	-	10	-19.1	60.3	0.205333333333	5	0.0220207253886	0.476406533575	-0.9097	1	27	active	0.740996347	active
Mus_musculus	tRNA-Gln-TTG-1-1	chr11	95859171	95859243	-	6	-27.1	72.6	1.61498611111	9	0.0699481865285	0.930930930931	0.13225	0	43	active	0.974561706	active
Mus_musculus	tRNA-Gln-TTG-2-1	chr13	21268468	21268540	-	6	-24.9	65.7	0.417361111111	10	0.0116580310881	0.164473684211	-0.8482	3	21	inactive	-0.777540199	active
Mus_musculus	tRNA-Gln-TTG-3-1	chr13	23519049	23519121	+	6	-22.0	66.9	0.282652777778	7	0.0181347150259	0.396151669496	-0.49125	6	39	active	0.671736653	active
Mus_musculus	tRNA-Gln-TTG-3-2	chr13	23519612	23519684	+	6	-22.0	66.9	0.264486111111	7	0.0220207253886	0.897435897436	-0.81565	6	39	active	0.926227308	active
Mus_musculus	tRNA-Gln-TTG-4-1	chrX	13859165	13859237	-	6	-27.6	57.7	0.0677777777778	29	0.0323834196891	0.703581871345	0.0	0	2	active	0.712072863	inactive
Mus_musculus	tRNA-Gln-TTG-5-1	chr11	86262167	86262239	+	6	-15.7	51.3	?	170	0.00388601036269	0.0	?	0	69	inactive	-0.846009791	inactive
Mus_musculus	tRNA-Glu-CTC-1-4	chr1	171103042	171103114	+	11	-26.4	73.2	0.302027777778	4	0.0427461139896	0.754107190951	-0.3638	4	43	active	0.945330254	active
Mus_musculus	tRNA-Glu-CTC-1-5	chr3	96501446	96501518	-	11	-26.4	73.2	0.30225	5	0.0362694300518	0.852272727273	-0.6478	4	34	active	0.932188912	active
Mus_musculus	tRNA-Glu-CTC-1-6	chr3	97158084	97158156	+	11	-26.4	73.2	0.0	6	0.0233160621762	0.385802469136	-0.19615	0	29	active	0.525538886	active
Mus_musculus	tRNA-Glu-CTC-1-7	chr10	30811139	30811211	+	11	-26.4	73.2	1.195625	6	0.020725388601	0.283309049701	-4.1324	0	12	active	0.891872367	active
Mus_musculus	tRNA-Glu-CTC-1-8	chr11	58302176	58302248	-	11	-26.4	73.2	0.396791666667	7	0.0414507772021	0.54012345679	-0.444	1	47	active	0.925789219	active
Mus_musculus	tRNA-Glu-CTC-1-9	chr13	21160784	21160856	-	11	-26.4	73.2	0.288486111111	6	0.0259067357513	0.46875	-0.7273	6	22	active	0.937510402	active
Mus_musculus	tRNA-Glu-CTC-2-1	chr17	56092000	56092072	-	11	-22.9	67.9	-0.019125	351	0.0246113989637	0.326797385621	0.0	0	98	inactive	-0.727015265	inactive
Mus_musculus	tRNA-Glu-CTC-5-1	chr7	99543899	99543971	-	11	-16.6	51.6	?	351	0.00518134715026	0.165955429113	0.187333333333	0	49	inactive	-0.910353563	inactive
Mus_musculus	tRNA-Glu-TTC-1-1	chr7	58399314	58399386	+	8	-26.7	71.2	1.381875	7	0.0310880829016	0.607638888889	-3.89945	0	0	active	0.97097949	active
Mus_musculus	tRNA-Glu-TTC-1-2	chr9	104408666	104408738	-	8	-26.7	71.2	0.287458333333	227	0.0233160621762	0.441919191919	-0.5702	2	7	active	0.751430133	active
Mus_musculus	tRNA-Glu-TTC-1-3	chr13	23463534	23463606	+	8	-26.7	71.2	0.284458333333	8	0.0129533678756	0.340136054422	-0.2315	1	35	inactive	-0.639696478	active
Mus_musculus	tRNA-Glu-TTC-1-4	chr14	76152773	76152845	+	8	-26.7	71.2	1.60797222222	10	0.0427461139896	0.579710144928	-4.3895	0	27	active	0.987983894	active
Mus_musculus	tRNA-Glu-TTC-2-1	chr1	34434811	34434883	-	8	-24.8	70.4	0.300944444444	5	0.0479274611399	0.800304878049	0.2392	0	51	active	0.953121455	active
Mus_musculus	tRNA-Glu-TTC-2-2	chr14	79481667	79481739	+	8	-24.8	70.4	1.51291666667	9	0.111398963731	0.997150997151	-1.82025	0	23	active	0.984626801	active
Mus_musculus	tRNA-Gly-ACC-1-1	chr11	48823727	48823801	+	1	-27.1	70.7	0.413148648649	31	0.0348837209302	0.522388059701	-0.2454	1	43	active	0.880516981	active
Mus_musculus	tRNA-Gly-CCC-1-1	chr6	86403892	86403963	+	6	-31.4	75.1	0.301028169014	4	0.0466926070039	0.913043478261	-0.57405	0	50	active	0.964800982	active
Mus_musculus	tRNA-Gly-CCC-1-2	chr17	25875087	25875158	+	6	-31.4	75.1	1.39743661972	5	0.0557717250324	0.732026143791	-3.75545	0	148	active	0.987315369	active
Mus_musculus	tRNA-Gly-CCC-3-1	chr3	96424032	96424103	-	6	-24.5	75.9	0.38285915493	8	0.0168612191958	0.282258064516	-0.7728	1	35	inactive	-0.617380452	inactive
Mus_musculus	tRNA-Gly-CCC-4-1	chr4	32230249	32230320	+	6	-20.1	68.3	-0.156197183099	8	0.0181582360571	0.0	-0.2724	0	7	inactive	-0.714458525	inactive
Mus_musculus	tRNA-Gly-GCC-2-1	chr1	171044984	171045055	+	13	-26.4	81.0	1.12152112676	11	0.041504539559	0.594732370433	-1.69185	3	25	active	0.985857726	active
Mus_musculus	tRNA-Gly-GCC-2-2	chr2	57182393	57182464	-	13	-26.4	81.0	1.01094366197	6	0.0285343709468	0.433884297521	-4.3501	1	25	active	0.961795974	active
Mus_musculus	tRNA-Gly-GCC-2-3	chr3	84229010	84229081	-	13	-26.4	81.0	?	8	0.0324254215305	0.43598615917	?	0	23	active	0.938287928	active
Mus_musculus	tRNA-Gly-GCC-2-4	chr8	110630552	110630623	-	13	-26.4	81.0	1.29801408451	10	0.0168612191958	0.155193437535	0.032	1	47	inactive	-0.735779259	inactive
Mus_musculus	tRNA-Gly-GCC-2-5	chr8	110631245	110631316	-	13	-26.4	81.0	1.28753521127	7	0.0142671854734	0.104540023895	-0.75355	1	46	inactive	-0.76648143	inactive
Mus_musculus	tRNA-Gly-GCC-2-6	chr11	69118793	69118864	-	13	-26.4	81.0	0.910267605634	10	0.0311284046693	0.33217336286	-3.28725	6	90	active	0.888320114	active
Mus_musculus	tRNA-Gly-GCC-2-7	chr13	21710579	21710650	+	13	-26.4	81.0	0.284338028169	7	0.0324254215305	0.8	-0.4142	1	17	active	0.915679118	active
Mus_musculus	tRNA-Gly-GCC-2-8	chr13	23517202	23517273	+	13	-26.4	81.0	0.089338028169	9	0.0246433203632	0.507246376812	-0.70495	6	39	active	0.909738675	active
Mus_musculus	tRNA-Gly-GCC-3-1	chr1	74816746	74816817	-	13	-26.4	75.4	0.0	8	0.0518806744488	0.739957716702	0.05875	0	43	active	0.777706646	active
Mus_musculus	tRNA-Gly-GCC-4-1	chr8	111062560	111062631	+	13	-26.4	72.7	0.996943661972	8	0.0337224383917	0.531338104533	-4.58185	0	94	active	0.987195789	active
Mus_musculus	tRNA-Gly-TCC-1-1	chr1	171037996	171038068	-	7	-25.1	73.8	0.2645	9	0.0492227979275	1.12847222222	-0.7984	4	28	active	0.975493757	active
Mus_musculus	tRNA-Gly-TCC-1-5	chr1	171102755	171102827	+	7	-25.1	73.8	0.245194444444	5	0.0582901554404	0.853658536585	-0.700611111111	4	43	active	0.973627921	active
Mus_musculus	tRNA-Gly-TCC-1-6	chr3	96501008	96501080	-	7	-25.1	73.8	0.298833333333	10	0.0284974093264	0.673076923077	-0.82535	4	34	active	0.965269551	active
Mus_musculus	tRNA-Gly-TCC-1-7	chr11	69041277	69041349	-	7	-25.1	73.8	1.01988888889	10	0.0336787564767	0.591787439614	-1.30715	6	117	active	0.982296162	active
Mus_musculus	tRNA-His-GTG-1-1	chr3	96463971	96464043	-	10	-24.7	60.3	0.146833333333	24	0.0388601036269	0.603229317852	0.1939	2	25	active	0.89821322	active
Mus_musculus	tRNA-His-GTG-2-1	chr2	122375493	122375565	-	10	-25.5	60.1	1.48794444444	35	0.0544041450777	0.533130236101	0.4208	2	72	active	0.947270221	active
Mus_musculus	tRNA-His-GTG-2-2	chr2	122377362	122377434	-	10	-25.5	60.1	1.59195833333	33	0.050518134715	0.812164142648	-0.14675	2	72	active	0.956803137	active
Mus_musculus	tRNA-His-GTG-2-3	chr2	122377967	122378039	+	10	-25.5	60.1	1.47359722222	30	0.0466321243523	0.716845878136	0.296	2	72	active	0.951997494	active
Mus_musculus	tRNA-His-GTG-2-4	chr3	96410068	96410140	+	10	-25.5	60.1	0.112694444444	23	0.0466321243523	0.653594771242	-0.2213	1	37	active	0.926441608	active
Mus_musculus	tRNA-His-GTG-2-7	chr3	96500365	96500437	-	10	-25.5	60.1	1.12547222222	25	0.0453367875648	0.508720930233	-0.8144	4	34	active	0.983837396	active
Mus_musculus	tRNA-His-GTG-2-8	chr4	82619622	82619694	-	10	-25.5	60.1	0.943013888889	14	0.0284974093264	0.473805333694	-0.02235	0	6	active	0.8807907	active
Mus_musculus	tRNA-His-GTG-3-1	chr3	96435971	96436043	+	10	-25.5	55.5	0.277916666667	15	0.0401554404145	0.669642857143	-0.4962	1	27	active	0.796487939	active
Mus_musculus	tRNA-Ile-AAT-1-1	chr11	69037002	69037076	+	11	-25.5	81.2	0.439405405405	11	0.0374677002584	0.193584070796	-1.032	6	118	active	0.700021579	active
Mus_musculus	tRNA-Ile-AAT-1-2	chr11	69062319	69062393	-	11	-25.5	81.2	1.56487837838	11	0.0245478036176	0.629779577148	-5.5	3	118	active	0.976683422	active
Mus_musculus	tRNA-Ile-AAT-1-3	chr12	110845337	110845411	+	11	-25.5	81.2	0.973310810811	10	0.0490956072351	0.574712643678	-1.8159	0	47	active	0.985922688	active
Mus_musculus	tRNA-Ile-AAT-1-4	chr13	21855319	21855393	-	11	-25.5	81.2	0.105837837838	14	0.0206718346253	0.35593220339	-0.945	2	27	active	0.742946095	active
Mus_musculus	tRNA-Ile-AAT-1-5	chr13	21882032	21882106	-	11	-25.5	81.2	0.280810810811	11	0.0348837209302	0.806451612903	-0.61545	1	25	active	0.927077483	active
Mus_musculus	tRNA-Ile-AAT-1-6	chr13	22029222	22029296	+	11	-25.5	81.2	0.263918918919	10	0.0413436692506	0.914554481317	-0.97325	4	23	active	0.979765921	active
Mus_musculus	tRNA-Ile-AAT-1-7	chr13	23309051	23309125	-	11	-25.5	81.2	0.116189189189	6	0.0322997416021	1.03572183471	-1.95905	4	21	active	0.984848322	active
Mus_musculus	tRNA-Ile-AAT-1-8	chr13	23438108	23438182	-	11	-25.5	81.2	1.29282432432	7	0.0322997416021	0.883838383838	-2.32035	8	34	active	0.898315838	active
Mus_musculus	tRNA-Ile-AAT-2-1	chr4	27904778	27904852	+	11	-24.5	80.3	0.0	188	0.00904392764858	0.225442834138	-0.4903	0	0	inactive	-0.824677668	inactive
Mus_musculus	tRNA-Ile-AAT-3-1	chr13	23397059	23397133	+	11	-23.2	78.5	0.105716216216	6	0.0322997416021	0.990853658537	-1.9551	2	28	active	0.985296237	active
Mus_musculus	tRNA-Ile-AAT-4-1	chr16	75434178	75434252	+	11	-23.8	66.9	0.0	143	0.0129198966408	0.416294974725	-0.13775	0	4	inactive	-0.721299215	inactive
Mus_musculus	tRNA-Ile-TAT-1-1	chr7	28372998	28373093	+	5	-32.7	73.7	1.44772972973	4	0.051572327044	0.875788209388	-0.04535	0	115	active	0.972779596	active
Mus_musculus	tRNA-Ile-TAT-2-1	chr13	21896937	21897031	-	5	-33.3	73.1	0.439135135135	2	0.0352644836272	0.464863559527	0.0333	0	18	active	0.930015029	active
Mus_musculus	tRNA-Ile-TAT-2-2	chr13	23270420	23270516	-	5	-33.3	73.0	0.211445945946	3	0.0439698492462	0.676290065924	-0.4716	0	17	active	0.957788514	active
Mus_musculus	tRNA-Ile-TAT-2-3	chr17	83861943	83862036	+	5	-30.2	73.2	1.40358108108	6	0.0870113493064	0.925812007874	0.21515	0	33	active	0.973363353	active
Mus_musculus	tRNA-Ile-TAT-3-1	chr1	153458663	153458736	+	5	-13.2	54.5	?	86	0.00776196636481	0.242438235973	?	0	54	inactive	-0.830778242	inactive
Mus_musculus	tRNA-Leu-AAG-1-1	chr11	48856973	48857055	-	5	-30.7	74.8	0.287414634146	5	0.0460358056266	0.821917808219	-0.7856	3	49	active	0.982128098	active
Mus_musculus	tRNA-Leu-AAG-1-2	chr13	21170035	21170117	+	5	-30.7	74.8	0.169012195122	5	0.0498721227621	0.925313945803	-0.55445	8	22	active	0.836728329	active
Mus_musculus	tRNA-Leu-AAG-1-3	chr14	51063882	51063964	+	5	-30.7	74.8	0.287304878049	6	0.042199488491	0.742424242424	-0.44375	2	24	active	0.958952664	active
Mus_musculus	tRNA-Leu-AAG-2-1	chr7	120917516	120917598	+	5	-28.8	72.5	1.53824390244	8	0.0780051150895	0.694444444444	-4.68705	0	63	active	0.984318334	active
Mus_musculus	tRNA-Leu-AAG-3-1	chr13	21170205	21170287	+	5	-29.2	74.1	0.0659024390244	9	0.0460358056266	0.963808025177	-0.3821	8	22	active	0.748744697	active
Mus_musculus	tRNA-Leu-CAA-1-1	chr13	21172836	21172942	-	4	-38.7	77.7	0.207674698795	6	0.0260545905707	0.656783636705	-0.6622	6	22	active	0.920175085	active
Mus_musculus	tRNA-Leu-CAA-2-1	chr13	21200203	21200308	+	4	-39.8	78.1	0.2875	8	0.0534161490683	0.670498084291	-0.495	0	23	active	0.943188433	active
Mus_musculus	tRNA-Leu-CAA-3-1	chr11	58302473	58302580	-	4	-40.5	75.6	0.439047619048	7	0.0495662949195	0.658546246782	-0.62735	1	48	active	0.950506749	active
Mus_musculus	tRNA-Leu-CAA-4-1	chr13	21914837	21914943	+	4	-40.7	75.1	0.0950238095238	7	0.029776674938	0.544554455446	-0.8172	7	17	active	0.945849757	active
Mus_musculus	tRNA-Leu-CAG-1-1	chr1	171065983	171066066	+	10	-35.7	78.2	0.231939759036	8	0.0842911877395	0.917778684226	-0.5876	9	34	active	0.804063273	active
Mus_musculus	tRNA-Leu-CAG-1-4	chr1	171101837	171101920	-	10	-35.7	78.2	0.231445783133	3	0.0332056194125	0.588235294118	-0.590052631579	4	43	active	0.918183072	active
Mus_musculus	tRNA-Leu-CAG-1-5	chr13	23453431	23453514	-	10	-35.7	78.2	0.274036144578	9	0.0344827586207	0.709459459459	-0.7417	3	33	active	0.959938428	active
Mus_musculus	tRNA-Leu-CAG-2-1	chr1	171038613	171038696	+	10	-32.8	77.3	0.301192771084	5	0.0357598978289	0.906214039125	-0.5179	4	27	active	0.934046984	active
Mus_musculus	tRNA-Leu-CAG-2-2	chr8	94703630	94703713	+	10	-32.8	77.3	0.280722891566	9	0.037037037037	0.698138297872	-0.7839	1	29	active	0.981743941	active
Mus_musculus	tRNA-Leu-CAG-2-3	chr8	94704003	94704086	-	10	-32.8	77.3	0.115506024096	8	0.0421455938697	0.815850815851	-0.52365	1	29	active	0.930320812	active
Mus_musculus	tRNA-Leu-CAG-3-1	chr8	38213200	38213283	+	10	-30.7	70.6	?	64	0.0140485312899	0.276199494949	?	0	3	inactive	-0.634841567	inactive
Mus_musculus	tRNA-Leu-CAG-4-1	chr3	24163024	24163107	-	10	-31.4	60.3	0.0	9	0.0114942528736	0.0874562718641	-0.05115	0	4	inactive	-0.737146249	inactive
Mus_musculus	tRNA-Leu-TAA-1-1	chr19	12011085	12011168	-	4	-28.2	86.4	0.286096385542	6	0.0344827586207	0.873015873016	-0.189	7	29	active	0.936245288	active
Mus_musculus	tRNA-Leu-TAA-2-1	chr10	12922570	12922653	-	4	-29.9	84.0	1.29948192771	9	0.0676883780332	0.988700564972	-1.89505	0	13	active	0.981963954	active
Mus_musculus	tRNA-Leu-TAA-3-1	chr13	21848021	21848104	-	4	-29.4	79.0	0.0735180722892	28	0.0191570881226	0.367096194186	-0.77455	2	27	active	0.688002416	inactive
Mus_musculus	tRNA-Leu-TAA-4-1	chrX	161135133	161135216	+	4	-24.3	55.3	?	36	0.00893997445722	0.194805194805	?	0	15	inactive	-0.83720404	inactive
Mus_musculus	tRNA-Leu-TAG-1-1	chr11	69124240	69124322	+	3	-33.3	75.2	1.59556097561	8	0.037084398977	0.840840840841	-2.92075	4	88	active	0.953626024	active
Mus_musculus	tRNA-Leu-TAG-2-1	chr14	51082829	51082911	-	3	-31.8	74.5	0.288719512195	3	0.0383631713555	0.633248190719	-0.60455	3	25	active	0.901994049	active
Mus_musculus	tRNA-Leu-TAG-3-1	chr7	120835478	120835560	-	3	-30.8	73.9	1.47241463415	10	0.039641943734	0.627521290901	-3.7033	0	68	active	0.940976957	active
Mus_musculus	tRNA-Lys-CTT-1-1	chrX	136195731	136195804	-	19	-28.5	86.4	?	6	0.0206985769728	0.261714855434	-0.206	0	30	active	0.682584459	inactive
Mus_musculus	tRNA-Lys-CTT-2-1	chr9	90126508	90126581	-	19	-30.1	88.0	0.416739726027	6	0.0362225097025	0.688853104312	-2.34755	0	53	active	0.985993935	active
Mus_musculus	tRNA-Lys-CTT-2-2	chr12	70969119	70969192	-	19	-30.1	88.0	1.26416438356	7	0.0219922380336	0.377155172414	-3.80685	0	49	active	0.92513109	active
Mus_musculus	tRNA-Lys-CTT-3-1	chr3	96428234	96428307	+	19	-28.0	87.8	0.174164383562	5	0.0116429495472	0.198375212545	-0.0998	2	30	inactive	-0.652329785	active
Mus_musculus	tRNA-Lys-CTT-3-2	chr3	96499511	96499584	-	19	-28.0	87.8	1.11156164384	5	0.0349288486417	0.63479725353	-4.16005	4	34	active	0.989020082	active
Mus_musculus	tRNA-Lys-CTT-3-3	chr11	48833882	48833955	-	19	-28.0	87.8	0.301328767123	9	0.0271668822768	0.54012345679	-0.7353	1	47	active	0.951968261	active
Mus_musculus	tRNA-Lys-CTT-3-4	chr13	23436339	23436412	+	19	-28.0	87.8	0.12802739726	9	0.0181112548512	0.198075834748	-0.3417	9	36	inactive	-0.519663019	inactive
Mus_musculus	tRNA-Lys-CTT-3-7	chr17	23547359	23547432	+	19	-28.0	87.8	0.49702739726	5	0.0323415265201	0.658823529412	-3.66435	4	31	active	0.987995225	active
Mus_musculus	tRNA-Lys-CTT-4-1	chr3	3149492	3149565	+	19	-19.7	66.7	0.135575342466	8	0.0103492884864	0.216718266254	-0.73555	0	0	inactive	-0.867797564	inactive
Mus_musculus	tRNA-Lys-CTT-5-1	chr5	98041089	98041162	-	19	-23.0	65.8	?	351	0.00517464424321	0.26282853567	?	0	14	inactive	-0.838674638	inactive
Mus_musculus	tRNA-Lys-CTT-6-1	chr9	14958432	14958505	-	19	-12.9	61.0	-0.7365	306	0.0155239327296	0.131282820705	-0.08985	0	12	inactive	-0.907760239	inactive
Mus_musculus	tRNA-Lys-CTT-7-1	chr1	110904746	110904819	-	19	-22.4	67.6	?	140	0.0103492884864	0.179211469534	?	0	14	inactive	-0.914005603	inactive
Mus_musculus	tRNA-Lys-CTT-8-1	chr16	16854263	16854336	+	19	-14.6	56.1	0.0	223	0.00776196636481	0.252525252525	-0.229	0	45	inactive	-0.952655469	inactive
Mus_musculus	tRNA-Lys-CTT-9-1	chr11	74137314	74137388	-	19	-13.4	54.0	-0.100959459459	68	0.00387596899225	0.16835016835	-0.64725	0	9	inactive	-0.931314843	inactive
Mus_musculus	tRNA-Lys-CTT-12-1	chr3	3123739	3123812	+	19	-23.4	51.7	0.141150684932	8	0.00646830530401	0.163857677903	-0.7097	0	0	inactive	-0.827573848	inactive
Mus_musculus	tRNA-Lys-CTT-13-1	chr2	86140983	86141060	-	19	-8.7	51.2	?	31	0.002574002574	0.0	-0.299117647059	0	13	inactive	-0.868809728	inactive
Mus_musculus	tRNA-Lys-CTT-14-1	chr16	47250545	47250618	+	19	-24.6	52.0	?	213	0.0116429495472	0.153846153846	?	0	0	inactive	-0.865883424	inactive
Mus_musculus	tRNA-Lys-TTT-1-1	chr1	133033961	133034034	+	13	-27.5	87.8	0.267534246575	6	0.0426908150065	0.872093023256	-0.25755	1	61	active	0.937226782	active
Mus_musculus	tRNA-Lys-TTT-1-2	chr1	133034326	133034399	-	13	-27.5	87.8	0.282575342466	8	0.0271668822768	0.563607085346	-0.2365	1	61	active	0.893342158	active
Mus_musculus	tRNA-Lys-TTT-1-3	chr11	69125175	69125248	-	13	-27.5	87.8	1.58410958904	6	0.0310478654592	0.648148148148	-4.61835	4	88	active	0.988105269	active
Mus_musculus	tRNA-Lys-TTT-1-4	chr13	21168074	21168147	-	13	-27.5	87.8	0.284	6	0.0181112548512	0.243506493506	-0.3932	8	22	active	0.549424026	active
Mus_musculus	tRNA-Lys-TTT-1-5	chr19	12006038	12006111	+	13	-27.5	87.8	1.24215068493	6	0.0388098318241	0.525	-4.06805	7	33	active	0.988789945	active
Mus_musculus	tRNA-Lys-TTT-1-6	chr19	12009695	12009768	-	13	-27.5	87.8	0.918726027397	7	0.0219922380336	0.649867374005	-2.3974	7	30	active	0.978981908	active
Mus_musculus	tRNA-Lys-TTT-2-1	chr7	28793987	28794060	-	13	-26.0	86.8	-0.12902739726	12	0.00646830530401	0.105517033464	0.0121	0	113	inactive	-0.766370816	inactive
Mus_musculus	tRNA-Lys-TTT-2-2	chr13	21907939	21908012	+	13	-26.0	86.8	0.282575342466	12	0.019404915912	0.641666666667	-0.4892	4	19	active	0.833460525	active
Mus_musculus	tRNA-Lys-TTT-3-1	chr13	21971787	21971860	+	13	-25.7	82.7	0.136917808219	44	0.00776196636481	0.079185520362	-0.6352	1	32	inactive	-0.788757485	inactive
Mus_musculus	tRNA-Lys-TTT-4-2	chr16	3449410	3449483	+	13	-20.6	54.0	0.135575342466	8	0.00388098318241	0.0515463917526	-0.73555	0	4	inactive	-0.875469891	inactive
Mus_musculus	tRNA-Met-CAT-1-1	chr8	121579228	121579301	-	17	-25.0	82.3	0.25401369863	10	0.0478654592497	0.487601003065	-0.61555	0	44	active	0.940259288	active
Mus_musculus	tRNA-Met-CAT-1-2	chr15	57975982	57976055	-	17	-25.0	82.3	0.29998630137	6	0.0556274256145	0.625798212005	-0.2656	0	39	active	0.93970126	active
Mus_musculus	tRNA-Met-CAT-2-1	chr13	21167603	21167676	+	17	-25.8	77.4	0.283917808219	4	0.025873221216	0.679875679876	-0.51435	8	22	active	0.785179276	active
Mus_musculus	tRNA-Met-CAT-2-2	chr13	21169686	21169759	-	17	-25.8	77.4	0.283808219178	8	0.0465717981889	1.01206939904	-0.61435	8	22	active	0.824948478	active
Mus_musculus	tRNA-Met-CAT-3-1	chr13	21326716	21326789	-	17	-24.0	77.1	0.0930273972603	4	0.0284605433376	0.812567713976	-0.38515	1	29	active	0.840684587	active
Mus_musculus	tRNA-Met-CAT-4-1	chr13	23317465	23317538	+	17	-24.3	76.9	-0.0748082191781	1	0.0232858990944	0.214680024535	-0.4444	2	22	inactive	-0.585566666	active
Mus_musculus	tRNA-Met-CAT-5-1	chr15	88641531	88641604	+	17	-19.7	67.8	0.0	351	0.0103492884864	0.166310287479	-0.0283	0	16	inactive	-0.964587758	inactive
Mus_musculus	tRNA-Met-CAT-6-1	chr5	109723478	109723551	-	17	-11.7	53.1	0.0	7	0.012936610608	0.127830533236	-0.0004	0	14	inactive	-0.882154081	inactive
Mus_musculus	tRNA-Phe-GAA-1-1	chr5	125406054	125406127	-	7	-21.9	88.9	1.29639726027	8	0.0388098318241	0.680272108844	-2.0926	4	46	active	0.987266203	active
Mus_musculus	tRNA-Phe-GAA-1-2	chr10	80248963	80249036	-	7	-21.9	88.9	0.657452054795	4	0.0530401034929	1.16132723112	-1.37535	1	89	active	0.972076472	active
Mus_musculus	tRNA-Phe-GAA-1-3	chr13	21161404	21161477	+	7	-21.9	88.9	0.299465753425	14	0.0271668822768	0.790513833992	-0.39645	6	22	active	0.895219195	active
Mus_musculus	tRNA-Phe-GAA-1-4	chr14	118089524	118089597	-	7	-21.9	88.9	0.227630136986	6	0.0672703751617	0.806097828471	-0.26275	0	32	active	0.942692981	active
Mus_musculus	tRNA-Phe-GAA-1-5	chr19	12002235	12002308	+	7	-21.9	88.9	0.229547945205	4	0.0232858990944	0.553447185326	-3.64935	7	34	active	0.975434383	active
Mus_musculus	tRNA-Phe-GAA-2-1	chr19	12008544	12008617	+	7	-20.4	87.2	1.1437260274	3	0.0181112548512	0.466666666667	-3.12365	7	31	active	0.876356265	active
Mus_musculus	tRNA-Phe-GAA-3-1	chr13	21882884	21882957	-	7	-21.9	87.9	0.249890410959	8	0.019404915912	0.357507660878	-0.8062	1	25	active	0.680321802	active
Mus_musculus	tRNA-Pro-AGG-1-1	chr1	165641633	165641705	+	6	-29.5	70.2	1.460625	6	0.0479274611399	0.633484162896	-4.35695	1	20	active	0.987832533	active
Mus_musculus	tRNA-Pro-AGG-1-2	chr3	51359406	51359478	+	6	-29.5	70.2	0.283930555556	2	0.0401554404145	0.614439324117	-0.51745	1	23	active	0.946931992	active
Mus_musculus	tRNA-Pro-AGG-1-3	chr6	29388823	29388895	+	6	-29.5	70.2	1.37329166667	9	0.0168393782383	0.0888888888889	-1.47455	0	93	active	0.506269531	active
Mus_musculus	tRNA-Pro-AGG-1-4	chr7	98815675	98815747	-	6	-29.5	70.2	1.44036111111	5	0.0621761658031	0.76299267527	-4.83945	1	22	active	0.987832533	active
Mus_musculus	tRNA-Pro-AGG-1-5	chr13	23436993	23437065	-	6	-29.5	70.2	1.411125	3	0.0272020725389	0.912884715702	-3.8752	9	36	active	0.910036451	active
Mus_musculus	tRNA-Pro-AGG-1-6	chr14	51064813	51064885	-	6	-29.5	70.2	0.281847222222	3	0.059585492228	0.929994890138	-0.69815	2	24	active	0.972591322	active
Mus_musculus	tRNA-Pro-CGG-1-1	chr1	165642270	165642342	-	3	-29.5	70.2	0.301361111111	3	0.0841968911917	0.951086956522	-0.29	1	20	active	0.8911588	active
Mus_musculus	tRNA-Pro-CGG-1-2	chr11	69040384	69040456	+	3	-29.5	70.2	0.301083333333	8	0.0712435233161	0.925191646841	-0.45215	6	117	active	0.909973056	active
Mus_musculus	tRNA-Pro-CGG-1-3	chr17	23540914	23540986	+	3	-29.5	70.2	0.706861111111	24	0.0349740932642	0.397677060977	-0.7424	6	32	active	0.862051159	active
Mus_musculus	tRNA-Pro-TGG-1-1	chr7	98815414	98815486	+	7	-28.9	70.5	1.54147222222	3	0.0556994818653	0.646898103504	-4.39545	1	22	active	0.988043059	active
Mus_musculus	tRNA-Pro-TGG-2-1	chr3	51358353	51358425	+	7	-29.5	70.3	0.126361111111	6	0.029792746114	0.460299194476	-1.6859375	1	23	active	0.97890669	active
Mus_musculus	tRNA-Pro-TGG-2-2	chr11	48856279	48856351	+	7	-29.5	70.3	0.300361111111	5	0.0414507772021	0.373418686176	-0.45955	3	49	active	0.834458799	active
Mus_musculus	tRNA-Pro-TGG-2-3	chr14	51090646	51090718	+	7	-29.5	70.3	1.48166666667	5	0.0336787564767	0.641697223677	-2.607	3	23	active	0.988006565	active
Mus_musculus	tRNA-Pro-TGG-2-4	chr17	23546475	23546547	-	7	-29.5	70.3	0.810722222222	2	0.0518134715026	0.880060346995	-5.3335	4	31	active	0.987644182	active
Mus_musculus	tRNA-Pro-TGG-3-1	chr11	67291138	67291210	+	7	-19.3	55.7	0.0	3	0.0116580310881	0.214680024535	0.2037	0	131	inactive	-0.881486971	inactive
Mus_musculus	tRNA-Pro-TGG-4-1	chrX	14702615	14702687	-	7	-23.2	55.7	?	6	0.00388601036269	0.0	-0.6096	0	0	inactive	-0.842186178	inactive
Mus_musculus	tRNA-SeC-TCA-1-1	chr7	19301243	19301330	+	2	-34.7	146.4	1.41432183908	15	0.0254129606099	0.671600877193	-4.9622	0	69	active	0.929890248	active
Mus_musculus	tRNA-Ser-AGA-1-1	chr13	21937093	21937175	-	8	-32.8	90.3	0.205524390244	4	0.0319693094629	0.606262491672	-0.4968	6	29	active	0.924364912	active
Mus_musculus	tRNA-Ser-AGA-2-1	chr4	10874063	10874145	+	8	-32.8	89.6	1.45214634146	10	0.0690537084399	0.377765785213	-0.84065	0	11	active	0.894226954	active
Mus_musculus	tRNA-Ser-AGA-2-2	chr11	69037476	69037558	+	8	-32.8	89.6	0.414451219512	11	0.0460358056266	0.925925925926	-0.51855	6	117	active	0.954224589	active
Mus_musculus	tRNA-Ser-AGA-2-3	chr13	21919214	21919296	+	8	-32.8	89.6	0.42806097561	10	0.0409207161125	0.839646464646	-0.27995	6	17	active	0.942781347	active
Mus_musculus	tRNA-Ser-AGA-2-4	chr13	21927856	21927938	+	8	-32.8	89.6	0.784987804878	113	0.0191815856777	0.0681596884129	-3.70185	7	19	active	0.861113412	inactive
Mus_musculus	tRNA-Ser-AGA-2-5	chr13	21940913	21940995	-	8	-32.8	89.6	0.271804878049	5	0.0268542199488	0.400326797386	-0.7224	5	29	active	0.907005862	active
Mus_musculus	tRNA-Ser-AGA-2-6	chr13	23500956	23501038	-	8	-32.8	89.6	0.916670731707	8	0.0191815856777	0.530303030303	-2.57205	5	42	active	0.940269148	active
Mus_musculus	tRNA-Ser-AGA-3-1	chrX	166909732	166909814	-	8	-20.6	56.6	?	13	0.00383631713555	0.10488462691	?	0	33	inactive	-0.851998299	inactive
Mus_musculus	tRNA-Ser-CGA-1-1	chr11	69110918	69111000	+	3	-34.0	95.1	1.58069512195	7	0.0511508951407	0.677083333333	-0.97635	2	83	active	0.942928505	active
Mus_musculus	tRNA-Ser-CGA-2-1	chr10	128458463	128458545	-	3	-29.8	89.6	1.56520731707	4	0.0562659846547	0.870576907647	-0.73395	0	136	active	0.92129174	active
Mus_musculus	tRNA-Ser-CGA-3-1	chr13	22022418	22022500	-	3	-28.5	90.1	0.259963414634	63	0.0242966751918	0.340798442064	-0.43465	5	24	active	0.741649887	active
Mus_musculus	tRNA-Ser-GCT-1-1	chr13	21994189	21994271	-	7	-30.1	91.0	0.417	8	0.0268542199488	0.721947194719	-0.59735	1	27	active	0.91771997	active
Mus_musculus	tRNA-Ser-GCT-2-1	chr2	119046749	119046831	-	7	-30.4	89.7	1.5327195122	8	0.0383631713555	0.927397986222	-1.22155	0	44	active	0.985399875	active
Mus_musculus	tRNA-Ser-GCT-3-1	chr19	5038303	5038385	-	7	-30.7	89.1	1.60309756098	6	0.0537084398977	0.813295615276	-2.6542	0	96	active	0.98711698	active
Mus_musculus	tRNA-Ser-GCT-4-1	chr11	69063041	69063123	-	7	-30.7	88.4	1.59363414634	27	0.037084398977	0.616197183099	-3.51965	3	118	active	0.988625648	active
Mus_musculus	tRNA-Ser-GCT-4-2	chr13	22050685	22050767	-	7	-30.7	88.4	0.174024390244	9	0.0485933503836	0.819323260268	-0.4393	0	23	active	0.95383416	active
Mus_musculus	tRNA-Ser-GCT-4-3	chr13	23521869	23521951	+	7	-30.7	88.4	1.35197560976	32	0.0281329923274	0.479452054795	-2.61765	7	38	active	0.984752999	active
Mus_musculus	tRNA-Ser-GCT-5-1	chr13	21492844	21492926	-	7	-29.0	88.0	0.342670731707	13	0.0076726342711	0.0667429443173	-0.8061	0	40	inactive	-0.603318498	inactive
Mus_musculus	tRNA-Ser-GGA-1-1	chr11	100538157	100538230	+	1	-19.8	77.6	0.0	4	0.00646830530401	0.110636952742	-0.30475	0	65	inactive	-0.846970543	inactive
Mus_musculus	tRNA-Ser-TGA-1-1	chr10	63429475	63429557	-	3	-34.9	94.0	1.53032926829	16	0.0703324808184	1.025390625	-2.6661	0	11	active	0.915390585	active
Mus_musculus	tRNA-Ser-TGA-2-1	chr13	21924934	21925016	-	3	-32.8	90.4	0.417353658537	1	0.0281329923274	0.531914893617	-0.49335	7	17	active	0.865008208	active
Mus_musculus	tRNA-Ser-TGA-2-2	chr13	23518145	23518227	+	3	-32.8	90.4	0.25587804878	8	0.0332480818414	0.723306544202	-1.04775	6	39	active	0.931983893	active
Mus_musculus	tRNA-Sup-TTA-1-1	chr13	21795798	21795881	+	1	-30.9	71.4	0.094313253012	36	0.0140485312899	0.340687865023	-0.6641	0	27	inactive	-0.606980674	inactive
Mus_musculus	tRNA-Thr-AGT-1-1	chr7	35234769	35234843	-	9	-27.3	82.6	1.56090540541	10	0.0542635658915	0.781914893617	-1.5671	0	55	active	0.985762336	active
Mus_musculus	tRNA-Thr-AGT-1-2	chr11	69037852	69037926	+	9	-27.3	82.6	0.438054054054	34	0.0271317829457	0.847115772489	-0.70875	6	117	active	0.947955654	active
Mus_musculus	tRNA-Thr-AGT-1-3	chr11	69062743	69062817	-	9	-27.3	82.6	0.659513513514	13	0.0348837209302	0.729166666667	-3.7833	3	118	active	0.988053701	active
Mus_musculus	tRNA-Thr-AGT-2-1	chr13	23450621	23450695	+	9	-27.0	81.4	1.50898648649	0	0.0258397932817	0.582750582751	-3.81355	3	32	active	0.986367506	active
Mus_musculus	tRNA-Thr-AGT-3-1	chr11	69110464	69110538	+	9	-27.3	80.1	1.24635135135	81	0.0284237726098	0.443037974684	-4.0162	2	83	active	0.951057122	active
Mus_musculus	tRNA-Thr-AGT-4-1	chr13	21856020	21856094	+	9	-27.0	80.4	0.117243243243	7	0.0284237726098	0.860403863038	-0.30555	2	26	active	0.891038893	active
Mus_musculus	tRNA-Thr-AGT-5-1	chr13	22030099	22030173	-	9	-26.1	81.9	1.37654054054	7	0.0129198966408	0.0954719039825	-2.3078	4	23	active	0.56991289	inactive
Mus_musculus	tRNA-Thr-AGT-6-1	chr13	21249193	21249267	-	9	-25.5	79.7	0.394932432432	32	0.0116279069767	0.430731364276	-0.40185	3	31	active	0.584953069	inactive
Mus_musculus	tRNA-Thr-AGT-7-1	chr14	58818152	58818226	-	9	-25.3	75.6	?	351	0.0142118863049	0.143756845564	?	0	1	inactive	-0.838062288	inactive
Mus_musculus	tRNA-Thr-CGT-1-1	chr16	13437322	13437394	+	4	-27.0	79.6	1.51740277778	26	0.0751295336788	1.01351351351	-0.11595	0	50	active	0.968723138	active
Mus_musculus	tRNA-Thr-CGT-2-1	chr11	79704649	79704721	+	4	-27.3	78.3	1.23877777778	16	0.0816062176166	0.787712895377	-0.02845	0	32	active	0.966134381	active
Mus_musculus	tRNA-Thr-CGT-3-1	chr13	21322812	21322886	+	4	-26.0	78.2	0.805945945946	4	0.0206718346253	0.667726550079	-2.29605	1	29	active	0.962411919	active
Mus_musculus	tRNA-Thr-CGT-4-1	chr13	21264579	21264653	+	4	-26.3	76.5	0.978351351351	8	0.0219638242894	0.675675675676	-2.86425	2	26	active	0.978435269	active
Mus_musculus	tRNA-Thr-TGT-1-1	chr13	21275955	21276029	+	4	-26.0	83.6	0.437013513514	3	0.0361757105943	0.694858050427	-0.6007	2	22	active	0.937961751	active
Mus_musculus	tRNA-Thr-TGT-2-1	chr14	51088649	51088722	+	4	-30.4	78.0	1.41435616438	14	0.0323415265201	0.345849802372	-4.6856	3	23	active	0.966593627	active
Mus_musculus	tRNA-Thr-TGT-3-1	chr11	48853618	48853691	+	4	-29.7	78.8	1.37821917808	9	0.0401034928849	1.05555555556	-3.85615	3	49	active	0.982864205	active
Mus_musculus	tRNA-Thr-TGT-3-2	chr14	51065167	51065240	-	4	-29.7	78.8	0.300095890411	8	0.0698576972833	0.921168066174	-0.5858	2	24	active	0.962140269	active
Mus_musculus	tRNA-Trp-CCA-1-1	chr11	62746014	62746086	-	8	-25.1	75.7	0.299888888889	10	0.0349740932642	0.650406504065	-0.4557	0	28	active	0.943570537	active
Mus_musculus	tRNA-Trp-CCA-2-1	chr10	91181411	91181483	-	8	-25.1	74.3	1.58213888889	3	0.0673575129534	0.992125984252	0.6556	1	24	active	0.971077623	active
Mus_musculus	tRNA-Trp-CCA-3-1	chr11	69041825	69041897	+	8	-24.5	73.4	1.11244444444	13	0.0310880829016	0.664767331434	-3.83715	6	117	active	0.98748566	active
Mus_musculus	tRNA-Trp-CCA-3-2	chr11	69063494	69063566	-	8	-24.5	73.4	1.51718055556	4	0.0362694300518	0.377007442225	-1.8286	3	117	active	0.913317758	active
Mus_musculus	tRNA-Trp-CCA-4-1	chr13	23498105	23498177	+	8	-25.1	73.3	0.264777777778	3	0.0336787564767	0.578703703704	-0.50485	5	40	active	0.924835087	active
Mus_musculus	tRNA-Trp-CCA-4-2	chr13	23506518	23506590	+	8	-25.1	73.3	0.286180555556	4	0.0259067357513	0.466355762825	-0.4328	5	38	active	0.892829387	active
Mus_musculus	tRNA-Trp-CCA-5-1	chr11	61407915	61407987	-	8	-25.1	75.1	1.20509722222	7	0.0673575129534	0.841346153846	-2.3002	0	45	active	0.986999677	active
Mus_musculus	tRNA-Trp-CCA-6-1	chr10	23777082	23777154	-	8	-17.9	63.4	?	351	0.0181347150259	0.239684985448	0.0795	0	29	inactive	-0.671964338	inactive
Mus_musculus	tRNA-Tyr-GTA-1-1	chr13	23425645	23425734	-	10	-27.7	78.0	0.403726027397	6	0.0228136882129	0.13698630137	-2.4083	5	38	active	0.891220766	active
Mus_musculus	tRNA-Tyr-GTA-1-2	chr13	23426504	23426592	+	10	-30.3	78.0	0.0972602739726	6	0.0139593908629	0.191361399672	-0.41775	6	38	inactive	-0.691143205	active
Mus_musculus	tRNA-Tyr-GTA-1-3	chr13	23427094	23427180	-	10	-25.0	78.1	0.816763888889	6	0.0254452926209	0.348883572568	-2.92865	7	38	active	0.914226572	active
Mus_musculus	tRNA-Tyr-GTA-1-4	chr13	23432989	23433077	-	10	-28.3	78.0	1.50721917808	7	0.0393401015228	0.435865504359	-3.5685	9	36	active	0.89260187	active
Mus_musculus	tRNA-Tyr-GTA-1-5	chr13	23467075	23467165	+	10	-29.6	77.9	0.191904109589	6	0.0164556962025	0.262762762763	-0.36565	1	35	inactive	-0.62594541	inactive
Mus_musculus	tRNA-Tyr-GTA-2-1	chr5	30888082	30888171	+	10	-26.9	77.9	1.60302739726	13	0.0443599493029	0.912430382747	-3.91055	1	97	active	0.987891447	active
Mus_musculus	tRNA-Tyr-GTA-3-1	chr3	19628781	19628870	+	10	-30.3	75.5	1.18410958904	12	0.063371356147	1.0989010989	-3.65285	3	20	active	0.98305928	active
Mus_musculus	tRNA-Tyr-GTA-3-2	chr14	51089488	51089578	+	10	-29.7	75.4	0.97195890411	10	0.0455696202532	0.702408256881	-3.8058	3	23	active	0.987395025	active
Mus_musculus	tRNA-Tyr-GTA-4-1	chr3	19628354	19628447	+	10	-32.4	72.5	0.266863013699	10	0.0769230769231	0.819088319088	-0.4256	3	19	active	0.946659186	active
Mus_musculus	tRNA-Tyr-GTA-5-1	chr13	23428737	23428826	-	10	-22.1	66.4	0.636724137931	8	0.020278833967	0.331021437579	?	9	38	active	0.691247707	active
Mus_musculus	tRNA-Val-AAC-1-1	chr3	30601269	30601342	+	8	-24.7	79.4	1.53171232877	4	0.0310478654592	0.547730829421	-2.8296	0	31	active	0.986836178	active
Mus_musculus	tRNA-Val-AAC-1-2	chr11	48856636	48856709	+	8	-24.7	79.4	0.282726027397	11	0.0517464424321	0.925925925926	-0.58385	3	49	active	0.956770131	active
Mus_musculus	tRNA-Val-AAC-2-1	chr13	23285400	23285473	+	8	-26.9	79.1	0.110342465753	4	0.0297542043984	0.374847001224	-1.103	1	18	active	0.835566859	active
Mus_musculus	tRNA-Val-AAC-2-2	chr13	23413247	23413320	-	8	-26.9	79.1	0.0956301369863	7	0.025873221216	0.302506482282	-0.66465	2	36	active	0.715761904	active
Mus_musculus	tRNA-Val-AAC-3-1	chr13	23401072	23401145	-	8	-26.4	78.7	0.112369863014	0	0.0271668822768	0.283343452742	-0.8014	2	28	active	0.778397157	active
Mus_musculus	tRNA-Val-AAC-4-1	chr13	23298780	23298853	+	8	-25.4	78.4	0.0180821917808	9	0.0271668822768	0.420817588458	0.0191	3	21	active	0.701430579	active
Mus_musculus	tRNA-Val-AAC-5-1	chr13	22015790	22015863	-	8	-24.8	78.1	0.254863013699	7	0.0284605433376	0.544444444444	-0.6109	2	28	active	0.904122759	active
Mus_musculus	tRNA-Val-AAC-6-1	chr4	139430505	139430577	-	8	-15.2	68.9	0.0546944444444	351	0.0246113989637	0.252252252252	-0.0361	0	126	inactive	-0.733791454	inactive
Mus_musculus	tRNA-Val-CAC-1-1	chr13	23307628	23307701	+	10	-26.9	79.1	0.0	6	0.0232858990944	0.372869318182	0.0	5	22	active	0.608357284	active
Mus_musculus	tRNA-Val-CAC-2-1	chr1	171111442	171111515	+	10	-24.7	79.4	0.285876712329	9	0.0504527813713	0.7	-0.7762	4	39	active	0.980567867	active
Mus_musculus	tRNA-Val-CAC-2-2	chr3	96332739	96332812	+	10	-24.7	79.4	0.284109589041	7	0.0336351875809	0.496453900709	-0.6231	3	30	active	0.919642931	active
Mus_musculus	tRNA-Val-CAC-2-3	chr11	48818541	48818614	+	10	-24.7	79.4	0.264589041096	2	0.0284605433376	0.533943554539	-0.97675	1	42	active	0.957841049	active
Mus_musculus	tRNA-Val-CAC-2-4	chr13	22026547	22026620	+	10	-24.7	79.4	0.0362602739726	7	0.0401034928849	0.793265339161	-0.5886	4	22	active	0.78690382	active
Mus_musculus	tRNA-Val-CAC-2-5	chr13	23446141	23446214	-	10	-24.7	79.4	0.433082191781	12	0.0569210866753	0.684931506849	-0.7469	7	32	active	0.974019325	active
Mus_musculus	tRNA-Val-CAC-3-1	chr13	23300121	23300194	+	10	-26.4	78.7	-0.430438356164	15	0.0323415265201	0.597014925373	-1.3199	4	21	active	0.92004943	active
Mus_musculus	tRNA-Val-CAC-4-1	chr6	10100370	10100443	+	10	-23.2	78.7	0.0	232	0.0181112548512	0.0	-0.1514	0	1	inactive	-0.790408471	inactive
Mus_musculus	tRNA-Val-CAC-5-1	chr13	23412076	23412149	-	10	-12.0	58.2	-0.457943661972	132	0.0491591203105	0.979381443299	-1.1629	2	35	active	0.674558811	active
Mus_musculus	tRNA-Val-CAC-7-1	chr3	59474925	59474997	-	10	-21.3	55.4	0.0	11	0.00518134715026	0.0972222222222	0.0	0	5	inactive	-0.880295769	inactive
Mus_musculus	tRNA-Val-TAC-1-1	chr19	12011930	12012003	+	3	-23.6	80.5	0.285863013699	17	0.0491591203105	0.799695354151	-0.67795	7	29	active	0.910257385	active
Mus_musculus	tRNA-Val-TAC-1-2	chr19	12012265	12012338	+	3	-23.6	80.5	0.299438356164	7	0.0388098318241	1.01292687633	-0.48695	7	29	active	0.878775452	active
Mus_musculus	tRNA-Val-TAC-1-3	chrX	160766109	160766182	+	3	-23.6	80.5	1.1832739726	21	0.0478654592497	0.637339467127	-4.30345	0	22	active	0.928614791	active
Mus_musculus	tRNA-iMet-CAT-1-1	chr3	90475859	90475931	-	17	-26.1	60.4	1.57263888889	12	0.0414507772021	0.777232351566	-3.73735	0	85	active	0.987140836	active
Mus_musculus	tRNA-iMet-CAT-1-2	chr13	21710993	21711065	+	17	-26.1	60.4	0.300833333333	9	0.0349740932642	0.878136200717	-0.5575	1	17	active	0.930126449	active
Mus_musculus	tRNA-iMet-CAT-1-3	chr13	21931168	21931240	-	17	-26.1	60.4	0.415	6	0.0246113989637	0.632911392405	-1.0273	7	22	active	0.949371891	inactive
Mus_musculus	tRNA-iMet-CAT-1-4	chr13	21975031	21975103	+	17	-26.1	60.4	0.398152777778	7	0.0284974093264	0.878514056225	-0.9898	1	30	active	0.957040231	active
Mus_musculus	tRNA-iMet-CAT-1-5	chr13	23500079	23500151	+	17	-26.1	60.4	0.126333333333	4	0.0168393782383	0.491573033708	-0.22545	5	41	active	0.718330633	inactive
Mus_musculus	tRNA-iMet-CAT-1-6	chr13	23517691	23517763	+	17	-26.1	60.4	0.268111111111	7	0.0272020725389	0.723805147059	-0.80515	6	39	active	0.958765985	active
Mus_musculus	tRNA-iMet-CAT-1-7	chr13	23530347	23530419	-	17	-26.1	60.4	0.723527777778	7	0.0246113989637	0.715583825534	-1.5717	2	40	active	0.976054519	active
Mus_musculus	tRNA-iMet-CAT-2-1	chr15	69396622	69396694	-	17	-22.4	53.1	?	351	0.0259067357513	0.112504018001	-0.526	0	0	inactive	-0.67633025	inactive
Mus_musculus	tRNA-iMet-CAT-3-1	chr13	21907110	21907182	+	17	-20.1	52.6	0.269888888889	7	0.0181347150259	0.457516339869	-0.69675	4	20	active	0.547855674	active
