# Supplementary material for: Predicting transfer RNA gene activity from sequence and genome context
Source: HighWire-hosted journal article supplement (doi:10.1101/gr.256164.119), 2019-12-19
Supplement: Supplemental_Table_S5.xlsx [file Supplemental_Table_S5.xlsx]

## Sheet: S5
Supplemental Table S5: All mouse tRNA genes from our test set that were incorrectly predicted by our model. The first five rows show the mean and standard deviation from the training data. Subsequent rows have feature information for each misclassified tRNA gene from the mouse data, along with the z-scores for each feature, and whether the feature is closer to the mean of the active or inactive g…
tRNA	Total Number of tRNAs With Identical Anticodon	Minimum Free Energy of Canonical tRNA Structure	tRNAscan-SE General Bit Score	Average PhyloP Score in tRNA Gene Sequence	Distance To Nearest TTTT Transcription Termination Sequence	CpG Density Across tRNA Locus	Observed/Expected CpG Islands Score Upstream of tRNA Gene	Average PhyloP Score in 5’ Flanking Region	tRNA Genes Within 10 Kilobases	Exons Within 75 Kilobases	Probability Score	Experimental Data	Classifier Prediction
activeMeans	11.1155	-27.3898	76.233	0.85946	15.868	0.0431497	0.667477	-2.60623	1.967	35.2508
activeSDs	6.32481	3.70091	9.49833	0.556218	27.8522	0.0192291	0.220115	1.2735	1.89464	28.6523
inactiveMeans	17.8889	-23.5444	69.9302	0.354919	66.8889	0.0180321	0.268758	-1.21454	0.84127	21.6032
inactiveSDs	9.58191	4.31538	11.1146	0.443375	106.049	0.0175013	0.221103	0.933683	1.3825	19.4541
tRNA-Asp-GTC-1-9	16	-26.4	66.5	No PhyloP Data	11	0.0401554	0.12987	No PhyloP Data	0	0	0.63752	inactive	active
activeZScores	0.772275	0.267439	-1.02471	-	-0.174779	-0.155714	-2.4424	-	-1.03819	-1.2303
inactiveZScores	-0.197131	-0.661717	-0.308618	-	-0.527009	1.2641	-0.628159	-	-0.608512	-1.11047
lowerZScore	inactive	active	inactive	-	active	active	inactive	-	inactive	inactive
tRNA-Cys-GCA-3-2	54	-26.1	81.9	1.32444	15	0.0168394	0.630144	-3.36775	1	48	0.754506	inactive	active
activeZScores	6.78037	0.3485	0.596631	0.835974	-0.031164	-1.36826	-0.169608	-0.597969	-0.510385	0.444962
inactiveZScores	3.76867	-0.592198	1.07695	2.1867	-0.489291	-0.0681533	1.63447	-2.30615	0.114814	1.35688
lowerZScore	inactive	active	active	active	active	inactive	active	active	inactive	active
tRNA-Ala-TGC-1-1	11	-30.5	84.9	0.270917	6	0.0194301	0.42735	-0.2742	3	30	0.794678	inactive	active
activeZScores	-0.0182633	-0.840396	0.912476	-1.05812	-0.354298	-1.23353	-1.09092	1.8312	0.545223	-0.18326
inactiveZScores	-0.718947	-1.61181	1.34686	-0.189462	-0.574157	0.0798743	0.717277	1.00713	1.56147	0.431623
lowerZScore	active	active	active	inactive	active	inactive	inactive	inactive	active	active
tRNA-Thr-AGT-6-1	9	-25.5	79.7	0.394932	32	0.0116279	0.430731	-0.40185	3	31	0.584953	inactive	active
activeZScores	-0.334479	0.510622	0.365011	-0.835153	0.579201	-1.63928	-1.07556	1.73096	0.545223	-0.148359
inactiveZScores	-0.927674	-0.45316	0.87901	0.0902468	-0.328988	-0.36593	0.732568	0.870412	1.56147	0.483026
lowerZScore	active	inactive	active	inactive	inactive	inactive	inactive	inactive	active	active
tRNA-Leu-TAA-3-1	4	-29.4	79	0.0735181	28	0.0191571	0.367096	-0.77455	2	27	0.688002	inactive	active
activeZScores	-1.12502	-0.543172	0.291314	-1.41301	0.435585	-1.24772	-1.36466	1.43831	0.0174193	-0.287964
inactiveZScores	-1.44949	-1.35691	0.81603	-0.634681	-0.366706	0.0642775	0.444761	0.471241	0.83814	0.277413
lowerZScore	active	active	active	inactive	inactive	inactive	inactive	inactive	active	inactive
tRNA-Ser-AGA-2-4	8	-32.8	89.6	0.784988	113	0.0191816	0.0681597	-3.70185	7	19	0.861113	inactive	active
activeZScores	-0.492586	-1.46186	1.4073	-0.13389	3.48741	-1.24645	-2.72275	-0.860317	2.65644	-0.567174
inactiveZScores	-1.03204	-2.14479	1.76973	0.969989	0.434809	0.0656773	-0.907261	-2.66398	4.45477	-0.133811
lowerZScore	active	active	active	active	inactive	inactive	inactive	active	active	inactive
tRNA-iMet-CAT-1-3	17	-26.1	60.4	0.415	6	0.0246114	0.632911	-1.0273	7	22	0.949372	inactive	active
activeZScores	0.930383	0.3485	-1.66693	-0.799075	-0.354298	-0.964076	-0.157036	1.23984	2.65644	-0.46247
inactiveZScores	-0.0927674	-0.592198	-0.857446	0.135508	-0.574157	0.37593	1.64698	0.200539	4.45477	0.020398
lowerZScore	inactive	active	inactive	inactive	active	inactive	active	inactive	active	inactive
tRNA-Asp-GTC-1-12	16	-26.4	66.5	0.116208	12	0.0181347	0.511696	-1.0237	6	29	0.854351	inactive	active
activeZScores	0.772275	0.267439	-1.02471	-1.33626	-0.138875	-1.30089	-0.707729	1.24266	2.12864	-0.218161
inactiveZScores	-0.197131	-0.661717	-0.308618	-0.538396	-0.51758	0.00586051	1.09875	0.204394	3.73144	0.38022
lowerZScore	inactive	active	inactive	inactive	active	inactive	active	inactive	active	active
tRNA-Thr-AGT-5-1	9	-26.1	81.9	1.37654	7	0.0129199	0.0954719	-2.3078	4	23	0.569913	inactive	active
activeZScores	-0.334479	0.3485	0.596631	0.929636	-0.318395	-1.57209	-2.59867	0.234342	1.07303	-0.427569
inactiveZScores	-0.927674	-0.592198	1.07695	2.30419	-0.564728	-0.292107	-0.783734	-1.17091	2.28479	0.0718011
lowerZScore	active	active	active	active	active	inactive	inactive	active	active	inactive
tRNA-iMet-CAT-1-5	17	-26.1	60.4	0.126333	4	0.0168394	0.491573	-0.22545	5	41	0.718331	inactive	active
activeZScores	0.930383	0.3485	-1.66693	-1.31806	-0.426106	-1.36826	-0.799149	1.86948	1.60083	0.200653
inactiveZScores	-0.0927674	-0.592198	-0.857446	-0.51556	-0.593017	-0.0681533	1.00774	1.05934	3.00812	0.997056
lowerZScore	inactive	active	inactive	inactive	active	inactive	active	inactive	active	active
tRNA-Gln-TTG-4-1	6	-27.6	57.7	0.0677778	29	0.0323834	0.703582	0	0	2	0.712073	inactive	active
activeZScores	-0.808801	-0.0568052	-1.95119	-1.42333	0.471489	-0.559895	0.164026	2.04651	-1.03819	-1.16049
inactiveZScores	-1.24076	-0.939792	-1.10037	-0.647627	-0.357277	0.820012	1.96661	1.3008	-0.608512	-1.00766
lowerZScore	active	active	inactive	inactive	inactive	active	active	inactive	inactive	inactive
tRNA-Lys-CTT-1-1	19	-28.5	86.4	No PhyloP Data	6	0.0206986	0.261715	-0.206	0	30	0.682584	inactive	active
activeZScores	1.2466	-0.299988	1.0704	-	-0.354298	-1.16756	-1.84342	1.88475	-1.03819	-0.18326
inactiveZScores	0.115959	-1.14835	1.48182	-	-0.574157	0.152356	-0.031855	1.08017	-0.608512	0.431623
lowerZScore	inactive	active	active	-	active	inactive	inactive	inactive	inactive	active
tRNA-Ala-TGC-5-1	11	-27.5	73.8	No PhyloP Data	4	0.0194301	0.574308	No PhyloP Data	1	7	0.65076	inactive	active
activeZScores	-0.0182633	-0.0297848	-0.256151	-	-0.426106	-1.23353	-0.423274	-	-0.510385	-0.985988
inactiveZScores	-0.718947	-0.916619	0.348177	-	-0.593017	0.0798743	1.38194	-	0.114814	-0.750648
lowerZScore	active	active	active	-	active	inactive	active	-	inactive	inactive
tRNA-Ala-TGC-5-2	11	-27.5	73.8	No PhyloP Data	4	0.0194301	0.493421	No PhyloP Data	2	12	0.669206	inactive	active
activeZScores	-0.0182633	-0.0297848	-0.256151	-	-0.426106	-1.23353	-0.790753	-	0.0174193	-0.811482
inactiveZScores	-0.718947	-0.916619	0.348177	-	-0.593017	0.0798743	1.0161	-	0.83814	-0.493633
lowerZScore	active	active	active	-	active	inactive	active	-	active	inactive
tRNA-Met-CAT-4-1	17	-24.3	76.9	-0.0748082	1	0.0232859	0.21468	-0.4444	2	22	-0.585567	active	inactive
activeZScores	0.930383	0.834867	0.0702225	-1.67968	-0.533817	-1.03301	-2.0571	1.69755	0.0174193	-0.46247
inactiveZScores	-0.0927674	-0.175085	0.627089	-0.96922	-0.621305	0.300192	-0.244583	0.82484	0.83814	0.020398
lowerZScore	inactive	inactive	active	inactive	active	inactive	inactive	inactive	active	inactive
tRNA-Tyr-GTA-1-2	10	-30.3	78	0.0972603	6	0.0139594	0.191361	-0.41775	6	38	-0.691143	active	inactive
activeZScores	-0.176371	-0.786355	0.186032	-1.37032	-0.354298	-1.51803	-2.16304	1.71848	2.12864	0.0959496
inactiveZScores	-0.82331	-1.56546	0.726058	-0.581132	-0.574157	-0.232712	-0.350048	0.853383	3.73144	0.842847
lowerZScore	active	active	active	inactive	active	inactive	inactive	inactive	active	active
tRNA-Glu-TTC-1-3	8	-26.7	71.2	0.284458	8	0.0129534	0.340136	-0.2315	1	35	-0.639696	active	inactive
activeZScores	-0.492586	0.186378	-0.529883	-1.03377	-0.282491	-1.57035	-1.48714	1.86473	-0.510385	-0.0087541
inactiveZScores	-1.03204	-0.731235	0.11425	-0.15892	-0.555298	-0.290195	0.322826	1.05286	0.114814	0.688638
lowerZScore	active	active	inactive	inactive	active	inactive	inactive	inactive	inactive	active
tRNA-Gln-CTG-3-2	10	-24.2	71.1	0.17	15	0.015544	0.266972	-0.33965	1	37	-0.76219	active	inactive
activeZScores	-0.176371	0.861887	-0.540411	-1.23955	-0.031164	-1.43562	-1.81953	1.7798	-0.510385	0.0610484
inactiveZScores	-0.82331	-0.151912	0.105253	-0.417072	-0.489291	-0.142167	-0.00807913	0.93703	0.114814	0.791444
lowerZScore	active	inactive	inactive	inactive	active	inactive	inactive	inactive	inactive	active
tRNA-Lys-CTT-3-1	19	-28	87.8	0.174164	5	0.0116429	0.198375	-0.0998	2	30	-0.65233	active	inactive
activeZScores	1.2466	-0.164887	1.21779	-1.23206	-0.390202	-1.63849	-2.13117	1.96814	0.0174193	-0.18326
inactiveZScores	0.115959	-1.03248	1.60778	-0.40768	-0.583587	-0.36507	-0.318326	1.19392	0.83814	0.431623
lowerZScore	inactive	active	active	inactive	active	inactive	inactive	inactive	active	active
tRNA-Ala-AGC-8-1	13	-18.2	57.5	0	0	0.0220207	0.385948	-0.03785	0	28	-0.746514	active	inactive
activeZScores	0.297952	2.48311	-1.97224	-1.54518	-0.569721	-1.0988	-1.27901	2.01679	-1.03819	-0.253063
inactiveZScores	-0.510221	1.23847	-1.11836	-0.800495	-0.630735	0.227902	0.530025	1.26027	-0.608512	0.328816
lowerZScore	active	inactive	inactive	inactive	active	inactive	inactive	inactive	inactive	active
tRNA-Gln-TTG-2-1	6	-24.9	65.7	0.417361	10	0.011658	0.164474	-0.8482	3	21	-0.77754	active	inactive
activeZScores	-0.808801	0.672744	-1.10893	-0.79483	-0.210683	-1.63771	-2.28519	1.38047	0.545223	-0.497371
inactiveZScores	-1.24076	-0.314122	-0.380595	0.140833	-0.536439	-0.364209	-0.471655	0.392359	1.56147	-0.031005
lowerZScore	active	inactive	inactive	inactive	active	inactive	inactive	inactive	active	inactive
tRNA-Gln-CTG-1-1	10	-24.5	73.6	0.212431	9	0.015544	0.394144	-1.0305	6	17	-0.566054	active	inactive
activeZScores	-0.176371	0.780826	-0.277207	-1.16327	-0.246587	-1.43562	-1.24178	1.23732	2.12864	-0.636976
inactiveZScores	-0.82331	-0.22143	0.330182	-0.321373	-0.545869	-0.142167	0.567093	0.197111	3.73144	-0.236617
lowerZScore	active	inactive	active	inactive	active	inactive	inactive	inactive	active	inactive
tRNA-Ala-TGC-6-1	11	-27.4	69.9	-0.0315556	5	0.0129534	0.254176	-0.58495	0	15	-0.753499	active	inactive
activeZScores	-0.0182633	-0.00276446	-0.666749	-1.60192	-0.390202	-1.57035	-1.87767	1.58719	-1.03819	-0.706779
inactiveZScores	-0.718947	-0.893446	-0.00271344	-0.871667	-0.583587	-0.290195	-0.0659527	0.674307	-0.608512	-0.339423
lowerZScore	active	active	inactive	inactive	active	inactive	inactive	inactive	inactive	inactive
