# Supplementary material for: Predicting transfer RNA gene activity from sequence and genome context
Source: HighWire-hosted journal article supplement (doi:10.1101/gr.256164.119), 2019-12-19
Supplement: Supplemental_Table_S7_.xlsx [file Supplemental_Table_S7_.xlsx]

## Sheet: S7
Supplemental Table S7: Normalized whole-tRNA read counts for DM-tRNA-seq, run in 3 replicates on mouse brain and liver.
tRNA	Mouse_Brain_M4_plusAlkB	Mouse_Brain_M5_plusAlkB	Mouse_Brain_M6_plusAlkB	M_dm_Liver_M4_plusAlkB	M_dm_Liver_M5_plusAlkB	M_dm_Liver_M6_plusAlkB
tRNA-Ala-AGC-1_wholecounts	86.4692	115.548	77.7882	25.3546	34.412	38.8128
tRNA-Ala-AGC-10_wholecounts	0	3.45656	0	0	0.366085	1.90882
tRNA-Ala-AGC-2_wholecounts	714.401	1135.73	802.489	1977.66	6234.42	6608.67
tRNA-Ala-AGC-3_wholecounts	2633.19	5371.01	2949.6	766.977	1720.23	2374.9
tRNA-Ala-AGC-4_wholecounts	1334.78	1875.93	1606.57	5318.13	9845.12	11866.2
tRNA-Ala-AGC-5_wholecounts	223.722	286.895	263.527	177.482	281.153	277.734
tRNA-Ala-AGC-6_wholecounts	1375.96	2016.66	1612.12	9019.91	17954.3	21798.5
tRNA-Ala-AGC-7_wholecounts	225.095	375.778	300.834	500.754	1130.1	1577.64
tRNA-Ala-AGC-8_wholecounts	0	0	0	0	0	0
tRNA-Ala-CGC-1_wholecounts	3182.21	4493.53	3359.98	3524.29	5862.48	9057.37
tRNA-Ala-CGC-2_wholecounts	2353.88	3170.66	2174.1	1552.97	3008.85	4695.71
tRNA-Ala-CGC-3_wholecounts	0	1.97518	0	0	0	0
tRNA-Ala-CGC-4_wholecounts	0	0	0	0	0	0.318137
tRNA-Ala-CGC-5_wholecounts	0	0	0	0	0	0
tRNA-Ala-CGC-6_wholecounts	0	0	0	0	0	0
tRNA-Ala-CGC-7_wholecounts	0	0	0	0	0	0
tRNA-Ala-TGC-1_wholecounts	94.7044	164.434	119.064	25.3546	112.388	160.659
tRNA-Ala-TGC-2_wholecounts	6611.47	9081.38	6484.2	10179.9	17708.6	26840.6
tRNA-Ala-TGC-3_wholecounts	6611.47	9081.38	6484.2	10179.9	17708.6	26840.6
tRNA-Ala-TGC-4_wholecounts	6083.73	7222.74	5606.31	5603.37	9609.72	15277.6
tRNA-Ala-TGC-5_wholecounts	6.17637	8.39451	15.0814	0	1.46434	0.954412
tRNA-Ala-TGC-6_wholecounts	337.642	447.378	339.728	31.6933	56.7431	80.8069
tRNA-Ala-TGC-7_wholecounts	67.2539	77.032	65.0881	6.33866	8.41995	14.9525
tRNA-Ala-TGC-8_wholecounts	7.5489	8.88831	12.7001	12.6773	14.6434	18.1338
tRNA-Arg-ACG-1_wholecounts	1994.28	2637.36	2705.92	3676.42	7091.43	8937.11
tRNA-Arg-ACG-2_wholecounts	209.31	269.612	277.021	1001.51	1645.92	2179.56
tRNA-Arg-ACG-3_wholecounts	1518.7	2484.78	1989.16	5387.86	9531.38	13426.4
tRNA-Arg-CCG-1_wholecounts	1375.27	1651.25	1533.54	4475.09	9358.96	8984.83
tRNA-Arg-CCG-2_wholecounts	1169.39	1593.97	1108.09	1800.18	3585.07	3438.75
tRNA-Arg-CCG-3_wholecounts	4340.62	4164.17	4573.63	773.316	1254.94	1463.75
tRNA-Arg-CCT-1_wholecounts	341.073	356.026	346.078	862.057	1310.58	1661.63
tRNA-Arg-CCT-2_wholecounts	133.821	145.67	207.964	342.287	434.543	549.105
tRNA-Arg-CCT-3_wholecounts	181.174	223.689	225.427	101.419	200.248	244.011
tRNA-Arg-CCT-4_wholecounts	1273.02	1653.72	1799.45	697.252	1015.52	1206.69
tRNA-Arg-TCG-1_wholecounts	4730.42	5942.82	3772.73	3055.23	5022.32	8079.1
tRNA-Arg-TCG-2_wholecounts	1859.09	2093.69	1304.94	1394.5	2303.41	4393.48
tRNA-Arg-TCG-3_wholecounts	1997.71	2658.1	1861.36	709.93	1302.16	1664.18
tRNA-Arg-TCG-4_wholecounts	788.517	925.866	841.383	2649.56	4934.82	6440.05
tRNA-Arg-TCT-1_wholecounts	821.458	952.531	823.126	2345.3	4006.8	3949.04
tRNA-Arg-TCT-2_wholecounts	131.763	206.9	213.521	602.172	1327.06	1218.78
tRNA-Arg-TCT-3_wholecounts	568.913	718.472	583.412	881.073	1884.97	1656.54
tRNA-Arg-TCT-4_wholecounts	93.3319	173.322	112.714	0	0	0
tRNA-Arg-TCT-5_wholecounts	58.3324	109.622	76.9945	69.7252	132.523	104.667
tRNA-Asn-GTT-1_wholecounts	15.7841	27.1587	43.6567	177.482	200.614	246.556
tRNA-Asn-GTT-2_wholecounts	0	1.97518	1.58751	6.33866	3.29476	5.72647
tRNA-Asn-GTT-3_wholecounts	145.488	199.987	205.583	805.009	1191.24	1478.07
tRNA-Asn-GTT-4_wholecounts	0	0	0	0	0	0
tRNA-Asp-GTC-1_wholecounts	22518.4	26266.4	24667.6	10585.6	17464.8	22723
tRNA-Asp-GTC-2_wholecounts	4327.58	4979.92	4044.19	1863.57	3108.79	3887.32
tRNA-Asp-GTC-3_wholecounts	0	0	0	0	0	0
tRNA-Asp-GTC-4_wholecounts	3.43132	4.93795	0.793757	0	2.19651	1.59069
tRNA-Cys-GCA-1_wholecounts	48.0385	88.8831	69.0569	38.0319	173.89	158.751
tRNA-Cys-GCA-10_wholecounts	0	0.493795	0.793757	0	0	0
tRNA-Cys-GCA-11_wholecounts	0	0	0	0	0	0
tRNA-Cys-GCA-12_wholecounts	0.686264	0	0	0	0	0
tRNA-Cys-GCA-13_wholecounts	0	0	0	0	0	0
tRNA-Cys-GCA-14_wholecounts	0	0.493795	0.793757	0	0	0
tRNA-Cys-GCA-15_wholecounts	0	0	0	0	0	0
tRNA-Cys-GCA-16_wholecounts	1.37253	0.98759	1.58751	0	0	0
tRNA-Cys-GCA-17_wholecounts	59.7049	88.8831	76.9945	12.6773	23.0633	21.3152
tRNA-Cys-GCA-18_wholecounts	0	0	0	0	0.366085	0
tRNA-Cys-GCA-19_wholecounts	0	0	0	0	0	0
tRNA-Cys-GCA-2_wholecounts	605.971	887.35	696.125	259.885	524.966	557.695
tRNA-Cys-GCA-21_wholecounts	5.49011	3.45656	6.35006	0	0	0
tRNA-Cys-GCA-24_wholecounts	0	1.48138	0	0	0	0
tRNA-Cys-GCA-25_wholecounts	0	0	0	0	0	0
tRNA-Cys-GCA-3_wholecounts	2174.08	2849.2	2243.95	1863.57	3307.21	3398.02
tRNA-Cys-GCA-4_wholecounts	57.6462	74.0692	75.407	0	2.19651	1.90882
tRNA-Cys-GCA-5_wholecounts	30.8819	78.0196	57.1505	12.6773	32.2155	33.0863
tRNA-Cys-GCA-6_wholecounts	0.686264	0	0	0	0	0.318137
tRNA-Cys-GCA-7_wholecounts	14.4115	24.196	10.3188	6.33866	21.9651	16.8613
tRNA-Cys-GCA-8_wholecounts	3.43132	1.97518	6.35006	0	5.49127	9.22598
tRNA-Cys-GCA-9_wholecounts	2.05879	1.48138	0	0	0.366085	1.59069
tRNA-Gln-CTG-1_wholecounts	39.117	53.3299	52.388	196.498	539.975	620.368
tRNA-Gln-CTG-2_wholecounts	5902.55	7064.73	5110.21	11054.6	16380.1	20911.5
tRNA-Gln-CTG-3_wholecounts	136.566	198.506	134.939	392.997	772.073	874.56
tRNA-Gln-CTG-4_wholecounts	127.645	146.163	70.6444	44.3706	49.7875	60.4461
tRNA-Gln-CTG-5_wholecounts	0	0	0.793757	0	0	0.954412
tRNA-Gln-TTG-1_wholecounts	1077.43	1165.85	1051.73	1926.95	2916.6	4247.13
tRNA-Gln-TTG-2_wholecounts	32.9407	73.0817	20.6377	25.3546	30.7511	43.2667
tRNA-Gln-TTG-3_wholecounts	1220.86	1259.67	1250.96	4836.4	7812.25	10477.2
tRNA-Gln-TTG-4_wholecounts	0	0	0	0	0	0
tRNA-Gln-TTG-5_wholecounts	0	1.48138	0	0	1.46434	0.636275
tRNA-Glu-CTC-1_wholecounts	59781.8	75610.9	65910.4	23180.5	25492.3	35535.9
tRNA-Glu-CTC-2_wholecounts	265.584	409.356	250.034	114.096	152.291	212.198
tRNA-Glu-CTC-5_wholecounts	0	0	0	0	0	0
tRNA-Glu-TTC-1_wholecounts	7546.84	7260.27	7851.05	2719.28	7412.48	8654.29
tRNA-Glu-TTC-2_wholecounts	6960.09	6248.98	7070	1882.58	5347.03	7164.45
tRNA-Glu-TTC-3_wholecounts	104.998	118.017	88.9008	44.3706	34.7781	52.4927
tRNA-Gly-ACC-1_wholecounts	0	1.48138	0	0	0	0
tRNA-Gly-CCC-1_wholecounts	17352.2	28571.5	16760.2	13495	26883.1	30230
tRNA-Gly-CCC-2_wholecounts	157.841	236.034	107.157	12.6773	42.8319	42.6304
tRNA-Gly-CCC-3_wholecounts	284.113	453.798	311.153	0	34.412	33.0863
tRNA-Gly-CCC-4_wholecounts	0	2.46897	0	0	0	0.318137
tRNA-Gly-GCC-1_wholecounts	1741.05	1982.59	2281.26	526.109	567.065	851.336
tRNA-Gly-GCC-2_wholecounts	31256.6	36748.7	37328.8	9571.37	14855	18324.7
tRNA-Gly-GCC-3_wholecounts	63.8225	80.4886	90.4883	31.6933	62.6005	74.126
tRNA-Gly-GCC-4_wholecounts	87.1555	140.732	564.362	38.0319	107.263	87.8059
tRNA-Gly-TCC-1_wholecounts	13734.9	22268.7	14466.2	24562.3	39460.6	49696.2
tRNA-His-GTG-1_wholecounts	7.5489	12.8387	17.4627	0	2.56259	1.90882
tRNA-His-GTG-2_wholecounts	14183	20467.3	14907.6	25500.4	42306.6	55781.9
tRNA-His-GTG-3_wholecounts	67.9401	113.573	85.7258	95.0799	107.995	150.797
tRNA-Ile-AAT-1_wholecounts	396.66	588.604	444.504	1850.89	3223.74	4191.78
tRNA-Ile-AAT-2_wholecounts	5.49011	3.45656	5.5563	12.6773	14.6434	26.4054
tRNA-Ile-AAT-3_wholecounts	2.05879	9.3821	2.38127	25.3546	10.6165	18.452
tRNA-Ile-AAT-4_wholecounts	0	0	0	0	0	1.59069
tRNA-Ile-TAT-1_wholecounts	5.49011	17.7766	3.17503	25.3546	27.0903	59.1735
tRNA-Ile-TAT-2_wholecounts	14.4115	12.8387	14.2876	38.0319	40.2693	70.3084
tRNA-Leu-AAG-1_wholecounts	4673.46	4806.11	4814.14	3296.1	3796.3	4669.62
tRNA-Leu-AAG-2_wholecounts	1888.6	1939.63	1983.6	862.057	997.215	1218.15
tRNA-Leu-AAG-3_wholecounts	281.368	349.113	368.303	1020.52	1514.49	2024.63
tRNA-Leu-CAA-1_wholecounts	391.857	466.142	395.291	386.658	539.975	762.257
tRNA-Leu-CAA-2_wholecounts	4138.17	5031.77	3935.45	3923.63	5145.69	8348.24
tRNA-Leu-CAA-3_wholecounts	2822.6	3297.56	2803.55	3384.84	4528.47	6488.09
tRNA-Leu-CAA-4_wholecounts	1430.17	1760.38	1377.17	1502.26	1854.22	2514.24
tRNA-Leu-CAG-1_wholecounts	2556.33	3170.66	2688.46	3391.18	4116.26	7225.22
tRNA-Leu-CAG-2_wholecounts	8533	11301.5	8837.7	9431.92	11072.6	18710.3
tRNA-Leu-CAG-3_wholecounts	0	0	0	0	0.366085	1.27255
tRNA-Leu-CAG-4_wholecounts	6.86264	5.92554	30.9565	6.33866	6.58953	12.0892
tRNA-Leu-TAA-1_wholecounts	391.17	419.232	337.347	380.319	462.365	675.724
tRNA-Leu-TAA-2_wholecounts	1296.35	1340.16	1153.33	906.428	1061.65	1505.43
tRNA-Leu-TAA-3_wholecounts	2.74506	4.93795	0.793757	0	0	0
tRNA-Leu-TAA-4_wholecounts	0	0	0	0	0	0
tRNA-Leu-TAG-1_wholecounts	999.886	1137.21	1124.75	1121.94	1499.12	1898.33
tRNA-Leu-TAG-2_wholecounts	254.604	359.977	324.647	564.14	801.726	1178.38
tRNA-Leu-TAG-3_wholecounts	4188.95	4542.42	4321.22	1724.11	2031.77	2605.23
tRNA-Lys-CTT-1_wholecounts	0	0.98759	0	0	0.366085	0.954412
tRNA-Lys-CTT-12_wholecounts	0	0	0	0	0	0
tRNA-Lys-CTT-13_wholecounts	0	0	0	0	0	0
tRNA-Lys-CTT-14_wholecounts	0	0	0	0	0	0
tRNA-Lys-CTT-2_wholecounts	1778.8	2212.7	1962.17	1457.89	2266.06	3036.94
tRNA-Lys-CTT-3_wholecounts	6415.19	7865.17	6996.18	4234.22	8070.34	11110
tRNA-Lys-CTT-4_wholecounts	0	0	1.58751	0	0.366085	1.27255
tRNA-Lys-CTT-5_wholecounts	0	0	0	0	0	0
tRNA-Lys-CTT-6_wholecounts	0	0	0	0	0	0
tRNA-Lys-CTT-7_wholecounts	0	0	0	0	0	0
tRNA-Lys-CTT-8_wholecounts	0	0	0	0	0	0
tRNA-Lys-CTT-9_wholecounts	0	0	0	0	0	0
tRNA-Lys-TTT-1_wholecounts	91.2731	113.573	69.0569	88.7412	205.374	398.626
tRNA-Lys-TTT-2_wholecounts	10.294	2.96277	9.52509	0	11.3486	12.4074
tRNA-Lys-TTT-3_wholecounts	0	0	0	0	0	0
tRNA-Lys-TTT-4_wholecounts	0	0	0	0	0	0
tRNA-Lys-TTT-5_wholecounts	0	0	0	0	0	0
tRNA-Met-CAT-1_wholecounts	277.251	302.696	297.659	1869.9	2739.41	4682.98
tRNA-Met-CAT-2_wholecounts	140.684	199.493	156.37	621.188	982.571	1591.32
tRNA-Met-CAT-3_wholecounts	53.5286	67.6499	74.6132	310.594	378.166	554.832
tRNA-Met-CAT-4_wholecounts	2.05879	5.43174	12.7001	0	7.68778	19.4064
tRNA-Met-CAT-5_wholecounts	0.686264	0.98759	0	0	1.83042	10.4985
tRNA-Met-CAT-6_wholecounts	0	0	0	0	0	0
tRNA-Phe-GAA-1_wholecounts	25.3918	46.4167	38.1004	82.4025	106.531	148.57
tRNA-Phe-GAA-2_wholecounts	0.686264	4.44415	0.793757	0	1.46434	1.90882
tRNA-Phe-GAA-3_wholecounts	14.4115	3.95036	44.4504	6.33866	15.7416	13.6799
tRNA-Pro-AGG-1_wholecounts	13369.1	15009.9	12671.5	5863.26	8275.35	8955.88
tRNA-Pro-CGG-1_wholecounts	19505.7	22160.5	18274.7	7517.65	10325.8	11417.3
tRNA-Pro-TGG-1_wholecounts	8022.42	9518.89	6844.57	1907.94	3369.44	3992.94
tRNA-Pro-TGG-2_wholecounts	18810.5	21124.6	17639.7	8284.62	11758.6	12819.7
tRNA-Pro-TGG-3_wholecounts	0	0.493795	0	0	0	0
tRNA-Pro-TGG-4_wholecounts	0	0	0	0	0	0
tRNA-SeC-TCA-1_wholecounts	14155.6	13311.2	10832.4	3929.97	9252.79	10920.4
tRNA-Ser-AGA-1_wholecounts	226.467	267.143	236.54	126.773	269.438	332.135
tRNA-Ser-AGA-2_wholecounts	9056.62	11857.5	8804.36	3758.82	7070.56	9244.75
tRNA-Ser-AGA-3_wholecounts	0	0	0	0	0	0
tRNA-Ser-CGA-1_wholecounts	305.387	404.418	343.697	469.061	493.482	791.208
tRNA-Ser-CGA-2_wholecounts	712.342	871.054	758.038	437.367	479.205	597.78
tRNA-Ser-CGA-3_wholecounts	8.23517	13.8263	7.93757	25.3546	42.8319	43.5848
tRNA-Ser-GCT-1_wholecounts	104.998	112.091	96.0446	164.805	193.293	261.509
tRNA-Ser-GCT-2_wholecounts	947.73	1106.59	1068.4	988.83	1220.16	1620.91
tRNA-Ser-GCT-3_wholecounts	664.303	770.814	652.469	310.594	281.519	365.858
tRNA-Ser-GCT-4_wholecounts	1533.8	1730.75	1573.23	1438.88	1928.17	2545.74
tRNA-Ser-GCT-5_wholecounts	11.6665	24.196	14.2876	19.016	25.992	17.8157
tRNA-Ser-GGA-1_wholecounts	2.74506	0	4.76254	0	0	0
tRNA-Ser-TGA-1_wholecounts	1754.78	2054.19	1814.53	988.83	1402.47	1849.33
tRNA-Ser-TGA-2_wholecounts	1957.91	2302.07	1712.93	602.172	1401.37	1636.18
tRNA-Sup-TCA-1_wholecounts	0	0	0	0	0	0
tRNA-Thr-AGT-1_wholecounts	776.851	1247.33	810.426	583.156	1207.35	1591.64
tRNA-Thr-AGT-2_wholecounts	142.057	231.59	132.557	114.096	202.079	325.455
tRNA-Thr-AGT-3_wholecounts	37.0582	47.8981	26.9878	19.016	57.1092	69.9902
tRNA-Thr-AGT-4_wholecounts	101.567	160.483	105.57	25.3546	63.3327	90.0329
tRNA-Thr-AGT-5_wholecounts	100.881	130.362	102.395	12.6773	15.7416	18.7701
tRNA-Thr-AGT-6_wholecounts	7.5489	5.43174	7.14382	12.6773	2.19651	3.18137
tRNA-Thr-AGT-7_wholecounts	0	2.46897	2.38127	0	5.49127	7.6353
tRNA-Thr-CGT-1_wholecounts	2360.06	2927.71	2440.8	1584.66	2685.23	3637.26
tRNA-Thr-CGT-2_wholecounts	3176.72	3917.28	3234.56	2218.53	3660.48	5051.7
tRNA-Thr-CGT-3_wholecounts	28.8231	58.7616	34.1316	6.33866	5.12519	13.3618
tRNA-Thr-CGT-4_wholecounts	244.996	313.56	245.271	19.016	41.7337	54.7196
tRNA-Thr-TGT-1_wholecounts	47.3522	92.3397	40.4816	0	3.29476	8.58971
tRNA-Thr-TGT-2_wholecounts	124.214	159.99	131.764	57.0479	145.336	184.838
tRNA-Thr-TGT-3_wholecounts	162.645	214.307	169.864	190.16	265.045	337.544
tRNA-Trp-CCA-1_wholecounts	70.6852	79.0072	66.6756	0	20.8668	19.4064
tRNA-Trp-CCA-2_wholecounts	628.618	763.407	724.701	557.802	820.396	1035.86
tRNA-Trp-CCA-3_wholecounts	538.717	753.531	738.988	2560.82	4029.13	4652.44
tRNA-Trp-CCA-4_wholecounts	409.013	513.547	512.767	792.332	1106.67	1522.61
tRNA-Trp-CCA-5_wholecounts	395.974	539.224	453.235	494.415	496.411	813.795
tRNA-Trp-CCA-6_wholecounts	0	0	0	0	0.366085	0
tRNA-Tyr-GTA-1_wholecounts	34.9995	32.5905	45.2442	361.303	615.388	1022.18
tRNA-Tyr-GTA-2_wholecounts	20.5879	39.9974	30.9565	133.112	205.374	324.818
tRNA-Tyr-GTA-3_wholecounts	66.5676	60.243	38.1004	285.24	530.823	792.798
tRNA-Tyr-GTA-4_wholecounts	9.60769	12.8387	6.35006	139.45	165.836	248.783
tRNA-Tyr-GTA-5_wholecounts	0	0	0	0	0	1.59069
tRNA-Val-AAC-1_wholecounts	3999.55	4532.05	4014.03	5501.95	7948.07	10312.4
tRNA-Val-AAC-2_wholecounts	610.775	686.375	642.944	76.0639	142.407	185.792
tRNA-Val-AAC-3_wholecounts	166.762	172.334	184.152	82.4025	123.004	160.977
tRNA-Val-AAC-4_wholecounts	206.565	294.796	225.427	63.3866	133.255	140.617
tRNA-Val-AAC-5_wholecounts	376.759	431.083	438.154	2136.13	3268.04	4174.28
tRNA-Val-CAC-1_wholecounts	216.859	272.081	199.233	63.3866	88.5925	101.486
tRNA-Val-CAC-2_wholecounts	11822.3	13157.2	11181.7	13463.3	18251.9	24699.2
tRNA-Val-CAC-3_wholecounts	1239.39	1335.22	1260.49	209.176	310.074	382.401
tRNA-Val-CAC-4_wholecounts	124.214	159.002	123.032	304.256	445.159	618.141
tRNA-Val-CAC-5_wholecounts	0	0	0	0	0	0
tRNA-Val-CAC-7_wholecounts	0	0	0	0	0	0
tRNA-Val-TAC-1_wholecounts	1088.41	1668.04	1327.16	2573.49	4131.27	5735.06
tRNA-iMet-CAT-1_wholecounts	14469.9	18849.1	16599.1	27490.8	38725.9	61671.9
tRNA-iMet-CAT-2_wholecounts	26.078	54.8112	35.7191	76.0639	94.0838	145.071
tRNA-iMet-CAT-3_wholecounts	62.45	89.3769	69.8507	126.773	216.722	322.909
