# Supplementary material for: Predicting transfer RNA gene activity from sequence and genome context
Source: HighWire-hosted journal article supplement (doi:10.1101/gr.256164.119), 2019-12-19
Supplement: Supplemental_Table_S8.xlsx [file Supplemental_Table_S8.xlsx]

## Sheet: S8
Supplemental Table S8: For all species included in this study, tRNA gene names, genomic locations, feature data, predictions and prediction probabilities are shown. For human and mouse, only tRNA genes in the training and test sets, respectively are shown. For all species, tRNA genes in segmental duplications are excluded.
species	tRNA	chr	start	end	strand	Total Number of tRNA Genes With Identical Anticodon	Minimum Free Energy of Canonical tRNA Secondary Structure	tRNAscan-SE General Bit Score	Average PhyloP Score in tRNA Gene Sequence	Distance To Nearest TTTT Transcription Termination Sequence	CpG Density Across tRNA Locus	Observed/Expected CpG Islands Score Upstream of tRNA Gene	Average PhyloP Score in 5' Flanking Region	tRNA Genes Within 10 Kilobases	Exons Within 75 Kilobases	prediction	probability	inTestSet
Aotus_nancymaae	JYKP02026507.1.tRNA1-ArgCCT	JYKP02026507.1	1078	1151	+	4	-30.6	71.7	0.930958904	12	0.033635188	0.665266106	-2.73775	0	0	active	0.968361242	True
Aotus_nancymaae	JYKP02111668.1.tRNA1-GluCTC	JYKP02111668.1	1149	1221	-	6	-26.4	73.2	1.167819444	6	0.020501139	0	-3.908777778	0	0	active	0.842378743	True
Aotus_nancymaae	KZ195588.1.tRNA2-TyrGTA	KZ195588.1	5722236	5722329	-	11	-28.4	75.3	0.870068493	12	0.070617907	0.809968847	-2.9503	2	19	active	0.986894964	True
Aotus_nancymaae	KZ195588.1.tRNA3-TyrGTA	KZ195588.1	5721624	5721713	-	11	-29.7	75.5	1.213931507	12	0.062103929	0.82173913	-3.3706	2	19	active	0.987880119	True
Aotus_nancymaae	KZ195588.1.tRNA4-AlaAGC	KZ195588.1	5721448	5721521	-	14	-32	59.7	1.63660274	1	0.045278137	0.804597701	-1.1141	2	19	active	0.978785618	True
Aotus_nancymaae	KZ195642.1.tRNA1-AsnGTT	KZ195642.1	4198925	4198999	+	17	-26.4	80.9	1.425891892	8	0.067183463	0.358974359	-3.31425	0	4	active	0.878351208	True
Aotus_nancymaae	KZ195677.1.tRNA1-LysCTT	KZ195677.1	536	609	+	12	-28	87.8	-0.033945205	9	0.010349288	0.044546264	-0.5598	0	0	inactive	-0.637487044	True
Aotus_nancymaae	KZ195705.1.tRNA1-IleAAT	KZ195705.1	1015	1089	+	9	-23.6	78.8	0.342821918	45	0.032299742	0.693265422	-2.98315	0	0	active	0.953431202	True
Aotus_nancymaae	KZ196050.1.tRNA2-LysCTT	KZ196050.1	7279629	7279702	-	12	-30.1	88	1.297643836	11	0.028460543	0.990566038	-3.30045	0	33	active	0.986211807	True
Aotus_nancymaae	KZ196119.1.tRNA1-LysCTT	KZ196119.1	1781	1854	-	12	-30.1	88	0.444164384	7	0.051746442	0.981216709	-2.45295	0	0	active	0.962905672	True
Aotus_nancymaae	KZ196472.1.tRNA1-ProAGG	KZ196472.1	9610345	9610417	+	12	-29.5	70.2	1.406805556	3	0.014248705	0.107131925	-1.41495	0	81	inactive	-0.577516819	True
Aotus_nancymaae	KZ196704.1.tRNA1-GlyCCC	KZ196704.1	732918	732989	+	3	-31.4	75.1	1.430070423	6	0.089494163	0.953405018	-4.4368	0	146	active	0.923547579	True
Aotus_nancymaae	KZ196745.1.tRNA1-AsnGTT	KZ196745.1	1215240	1215314	+	17	-17.2	66.5	0.003486486	12	0.00129199	0	-0.3088	0	1	inactive	-0.883382748	True
Aotus_nancymaae	KZ196935.1.tRNA1-ArgTCT	KZ196935.1	82259	82345	+	5	-29.9	70.3	1.190356164	1	0.043256997	1.017864562	-2.56175	4	20	active	0.986879914	True
Aotus_nancymaae	KZ196935.1.tRNA3-LysTTT	KZ196935.1	90578	90651	+	11	-26.7	85.3	0.952260274	7	0.034928849	0.809435708	-3.8172	6	21	active	0.987232759	True
Aotus_nancymaae	KZ196935.1.tRNA4-PheGAA	KZ196935.1	99496	99569	-	10	-21.9	78.6	0.306191781	9	0.031047865	0.625	-3.0302	3	25	active	0.985875107	True
Aotus_nancymaae	KZ196935.1.tRNA5-LysTTT	KZ196935.1	94912	94985	-	11	-27.5	87.8	1.247054795	10	0.03622251	0.719741481	-3.797	3	23	active	0.988231161	True
Aotus_nancymaae	KZ196935.1.tRNA6-PheGAA	KZ196935.1	91616	91689	-	10	-19.1	85.6	1.217657534	5	0.041397154	0.868917577	-2.9946	6	22	active	0.922113634	True
Aotus_nancymaae	KZ196935.1.tRNA7-ValTAC	KZ196935.1	81956	82029	-	4	-23.6	80.5	1.141410959	15	0.051746442	0.936883629	-3.2242	4	20	active	0.986708469	True
Aotus_nancymaae	KZ196935.1.tRNA8-ValTAC	KZ196935.1	81604	81677	-	4	-23.6	80.5	1.105876712	16	0.04915912	0.844645551	-3.16805	4	20	active	0.986708469	True
Aotus_nancymaae	KZ197370.1.tRNA1-ArgTCT	KZ197370.1	641456	641541	+	5	-30.7	71.1	1.658958904	3	0.085350318	0.911854103	0.76955	0	24	active	0.972452769	True
Aotus_nancymaae	KZ197721.1.tRNA1-ValAAC	KZ197721.1	421155	421228	-	6	-24.7	79.4	1.534479452	10	0.043984476	0.78716009	-5.60515	0	36	active	0.988007446	True
Aotus_nancymaae	KZ198077.1.tRNA1-ThrCGT	KZ198077.1	3336377	3336449	-	5	-27.3	78.3	1.24825	29	0.103626943	0.863689777	0.1903	0	12	active	0.950594931	True
Aotus_nancymaae	KZ198225.1.tRNA2-AlaTGC	KZ198225.1	2636188	2636260	+	8	-26.5	78.7	0.782138889	3	0.047927461	0.707070707	-3.1584	2	33	active	0.988014346	True
Aotus_nancymaae	KZ198225.1.tRNA4-PheGAA	KZ198225.1	2628849	2628922	-	10	-21.9	88.9	1.327657534	7	0.034928849	0.444059977	-2.9335	3	34	active	0.980181803	True
Aotus_nancymaae	KZ198225.1.tRNA5-AspGTC	KZ198225.1	2628311	2628383	-	8	-26.4	66.5	1.530041667	11	0.022020725	0.525426909	-4.44525	3	34	active	0.982081571	True
Aotus_nancymaae	KZ198225.1.tRNA6-AlaTGC	KZ198225.1	2622353	2622425	-	8	-26.5	79.7	1.337430556	6	0.015544041	0.40257649	-2.87825	2	36	active	0.735842836	True
Aotus_nancymaae	KZ198639.1.tRNA1-HisGTG	KZ198639.1	7999	8071	+	8	-25.5	60.1	0.193833333	28	0.069948187	0.839328537	-0.654	0	0	active	0.921991345	True
Aotus_nancymaae	KZ198639.1.tRNA2-GlyCCC	KZ198639.1	18000	18071	+	3	-19.2	66.5	-0.442521127	11	0.009079118	0.179487179	-0.7119	0	0	inactive	-0.84131134	True
Aotus_nancymaae	KZ198733.1.tRNA1-GluTTC	KZ198733.1	42739	42811	-	10	-19.7	63.4	?	1	0.023316062	0.294392523	?	1	12	active	0.762565785	True
Aotus_nancymaae	KZ198733.1.tRNA3-GluTTC	KZ198733.1	37276	37348	-	10	-26.6	70.7	?	1	0.016839378	0.177484787	?	1	12	inactive	-0.507323286	True
Aotus_nancymaae	KZ199127.1.tRNA1-PheGAA	KZ199127.1	58717	58790	+	10	-21.9	88.9	0.623972603	12	0.034928849	0.942011255	-1.5214	3	17	active	0.983657151	True
Aotus_nancymaae	KZ199127.1.tRNA10-AlaTGC	KZ199127.1	180863	180935	+	8	-28.5	68.4	0.219277778	8	0.03238342	0.407925408	-2.415684211	3	10	active	0.96738096	True
Aotus_nancymaae	KZ199127.1.tRNA11-AlaAGC	KZ199127.1	182369	182441	+	14	-28.9	76.4	-0.147736111	6	0.016839378	0.270897833	-2.2301	3	9	active	0.507068591	True
Aotus_nancymaae	KZ199127.1.tRNA12-PheGAA	KZ199127.1	189877	189950	+	10	-21.9	88.9	0.191150685	4	0.029754204	0.578649032	-2.03475	3	6	active	0.975249473	True
Aotus_nancymaae	KZ199127.1.tRNA14-AlaTGC	KZ199127.1	199417	199489	+	8	-28.5	80.5	0.197708333	8	0.033678756	0.540494166	-2.0342	2	5	active	0.977394284	True
Aotus_nancymaae	KZ199127.1.tRNA16-AlaAGC	KZ199127.1	215083	215155	+	14	-29	84.4	0.416861111	20	0.027202073	0.42865891	-0.8123	2	5	active	0.917800546	True
Aotus_nancymaae	KZ199127.1.tRNA18-AlaCGC	KZ199127.1	246001	246073	+	4	-26.5	79.7	1.138944444	10	0.033678756	0.765306122	-2.80885	0	5	active	0.967347875	True
Aotus_nancymaae	KZ199127.1.tRNA19-AlaAGC	KZ199127.1	257228	257300	+	14	-23.6	76.1	0.889138889	3	0.018134715	0.266227181	-3.77465	0	5	active	0.757429909	True
Aotus_nancymaae	KZ199127.1.tRNA2-MetCAT	KZ199127.1	67204	67277	+	15	-25.8	77.4	1.052027397	7	0.034928849	0.8125	-3.1306	6	17	active	0.987538906	True
Aotus_nancymaae	KZ199127.1.tRNA20-AlaAGC	KZ199127.1	233445	233517	-	14	-29.9	73.4	-0.175361111	91	0.016839378	0.076385858	-1.66565	1	5	inactive	-0.609584659	True
Aotus_nancymaae	KZ199127.1.tRNA21-ThrAGT	KZ199127.1	225271	225345	-	8	-27	82.9	0.032837838	49	0.019379845	0.569846955	-2.3449	2	5	active	0.832236978	True
Aotus_nancymaae	KZ199127.1.tRNA23-AlaCGC	KZ199127.1	220170	220242	-	4	-25.7	76.1	-0.177180556	8	0.027202073	0.526227865	-5.3254375	2	5	active	0.899615945	True
Aotus_nancymaae	KZ199127.1.tRNA24-LysTTT	KZ199127.1	208568	208641	-	11	-26	86.8	0.037534247	13	0.042690815	1.018478103	-2.32265	2	5	active	0.927777337	True
Aotus_nancymaae	KZ199127.1.tRNA25-ArgCCG	KZ199127.1	133944	134017	-	4	-27.1	67	0.420383562	4	0.03622251	0.705645161	-1.67845	0	10	active	0.979893743	True
Aotus_nancymaae	KZ199127.1.tRNA26-LeuCAA	KZ199127.1	77513	77619	-	5	-39.1	73.6	0.696630952	6	0.050868486	1.031746032	-1.9986	4	17	active	0.982099674	True
Aotus_nancymaae	KZ199127.1.tRNA27-MetCAT	KZ199127.1	73651	73724	-	15	-25.8	77.4	1.113890411	9	0.025873221	0.670103093	-2.52775	5	17	active	0.986379256	True
Aotus_nancymaae	KZ199127.1.tRNA28-LysTTT	KZ199127.1	69746	69819	-	11	-21.3	83.1	0.239849315	54	0.016817594	0.628044091	-2.3487	5	17	active	0.812578554	True
Aotus_nancymaae	KZ199127.1.tRNA29-GluCTC	KZ199127.1	58197	58269	-	6	-26.4	73.2	0.876013889	5	0.031088083	0.775365529	-3.0967	3	17	active	0.986651383	True
Aotus_nancymaae	KZ199127.1.tRNA3-LeuAAG	KZ199127.1	74587	74669	+	6	-30.7	74.8	0.634926829	6	0.046035806	0.752266143	-2.4331	5	17	active	0.986597382	True
Aotus_nancymaae	KZ199127.1.tRNA30-LeuAAG	KZ199127.1	50821	50903	-	6	-28.4	72.1	0.640914634	5	0.047314578	0.827205882	-2.43155	2	17	active	0.986711482	True
Aotus_nancymaae	KZ199127.1.tRNA4-GlnCTG	KZ199127.1	77012	77084	+	9	-24.7	71.5	1.131958333	12	0.031088083	0.583333333	-3.5164	5	17	active	0.987239471	True
Aotus_nancymaae	KZ199127.1.tRNA5-LeuCAA	KZ199127.1	119552	119657	+	5	-40.6	76.9	1.211722892	5	0.053416149	0.853658537	-2.7675	0	9	active	0.978555503	True
Aotus_nancymaae	KZ199127.1.tRNA6-AlaAGC	KZ199127.1	145771	145843	+	14	-31.9	84.7	1.083222222	1	0.050518135	1.053398058	-3.00495	0	12	active	0.979996674	True
Aotus_nancymaae	KZ199127.1.tRNA7-AlaAGC	KZ199127.1	164158	164230	+	14	-31.9	84.7	0.928972222	5	0.063471503	1.042968375	-4.3968	0	12	active	0.983108049	True
Aotus_nancymaae	KZ199127.1.tRNA9-PheGAA	KZ199127.1	177336	177409	+	10	-14.5	54.5	0.255136986	13	0.016817594	0.349860056	-1.91105	2	10	inactive	-0.590478892	True
Aotus_nancymaae	KZ199231.1.tRNA2-CysGCA	KZ199231.1	1851435	1851507	+	19	-26.1	81.9	1.618152778	8	0.033678756	0.70306038	-2.3662	0	58	active	0.987142332	True
Aotus_nancymaae	KZ199231.1.tRNA3-CysGCA	KZ199231.1	2127152	2127224	+	19	-23.9	81.8	1.520236111	7	0.044041451	0.611213235	-1.7556	1	31	active	0.986669446	True
Aotus_nancymaae	KZ199231.1.tRNA4-CysGCA	KZ199231.1	2137636	2137708	+	19	-26.1	77.3	0.999569444	11	0.007772021	0	-1.4069	1	33	inactive	-0.774608841	True
Aotus_nancymaae	KZ199231.1.tRNA5-CysGCA	KZ199231.1	2161703	2161775	+	19	-26.1	72.8	0.998375	7	0.010362694	0.274984287	-2.91545	0	40	inactive	-0.658689385	True
Aotus_nancymaae	KZ199231.1.tRNA6-AsnGTT	KZ199231.1	2231643	2231717	+	17	-26.4	80.9	1.582756757	7	0.056847545	0.930674264	-1.77555	0	63	active	0.986322203	True
Aotus_nancymaae	KZ199231.1.tRNA7-GlnTTG	KZ199231.1	4408117	4408189	+	4	-27.1	72.6	1.595875	10	0.07642487	0.866462793	0.2923	0	28	active	0.973307015	True
Aotus_nancymaae	KZ199231.1.tRNA8-CysGCA	KZ199231.1	2129076	2129148	-	19	-26.1	81.9	1.317708333	3	0.033678756	0.367801597	-3.2486	2	32	active	0.896007178	True
Aotus_nancymaae	KZ199354.1.tRNA1-ThrTGT	KZ199354.1	12	85	+	7	-30.4	78	1.443958333	25	0.057471264	3	-5.625454545	0	0	active	0.96277352	True
Aotus_nancymaae	KZ199354.1.tRNA2-TyrGTA	KZ199354.1	1599	1688	+	11	-28.9	75.5	0.94590411	10	0.045627376	0.639372448	-4.06435	0	0	active	0.970898738	True
Aotus_nancymaae	KZ199354.1.tRNA3-ProTGG	KZ199354.1	2340	2412	+	6	-23.4	57.2	1.52384058	12	0.03626943	0.644736842	-3.61705	0	0	active	0.896339805	True
Aotus_nancymaae	KZ199481.1.tRNA2-IleTAT	KZ199481.1	3667068	3667161	-	5	-29.5	73.2	1.414986486	6	0.097099622	0.998785671	0.3835	0	26	active	0.973307015	True
Aotus_nancymaae	KZ199521.1.tRNA1-LeuTAA	KZ199521.1	2177658	2177741	-	2	-32.3	88.7	1.329783133	8	0.083014049	1.036358628	-1.82585	0	10	active	0.893975073	True
Aotus_nancymaae	KZ199586.1.tRNA1-ArgCCG	KZ199586.1	879979	880052	+	4	-29	64.9	1.65909589	11	0.059508409	0.939941406	0.30045	0	22	active	0.972619742	True
Aotus_nancymaae	KZ199586.1.tRNA2-ArgCCT	KZ199586.1	10546792	10546865	+	4	-32.1	72.3	1.321205479	14	0.050452781	0.612764603	-3.18515	2	53	active	0.986865463	True
Aotus_nancymaae	KZ199586.1.tRNA3-ArgTCG	KZ199586.1	10548302	10548375	+	4	-25.9	68.8	0.232684932	5	0.053040103	0.715955582	-1.45735	2	53	active	0.981229561	True
Aotus_nancymaae	KZ199586.1.tRNA5-ArgCCT	KZ199586.1	10547615	10547688	-	4	-32.1	71.1	0.829876712	27	0.069857697	0.943627451	-3.0022	2	54	active	0.985376832	True
Aotus_nancymaae	KZ199641.1.tRNA1-MetCAT	KZ199641.1	2872076	2872149	+	15	-25	77.4	0.249452055	8	0.122897801	1.027551942	-0.51115	0	31	active	0.878666868	True
Aotus_nancymaae	KZ199660.1.tRNA1-GlyCCC	KZ199660.1	1512337	1512408	-	3	-31.4	75.1	1.288577465	6	0.046692607	0.733752621	-3.5978	0	39	active	0.940462619	True
Aotus_nancymaae	KZ199674.1.tRNA1-UndetNNN	KZ199674.1	19541	19612	+	2	-22.6	66.7	-0.08056338	5	0.022049287	0.303030303	-2.62395	0	0	active	0.640308671	True
Aotus_nancymaae	KZ199678.1.tRNA1-GluTTC	KZ199678.1	199966	200038	-	10	-24.8	66	0.708111111	10	0.044041451	0.615681019	-2.0221	1	60	active	0.98607096	True
Aotus_nancymaae	KZ199678.1.tRNA2-GluTTC	KZ199678.1	196190	196262	-	10	-24.8	70.4	0.696	10	0.044041451	0.602854331	-2.0694	1	60	active	0.98607096	True
Aotus_nancymaae	KZ200118.1.tRNA1-TrpCCA	KZ200118.1	606791	606863	-	7	-18.4	65.9	0.477791667	78	0.024611399	0.426680599	-1.80995	0	63	active	0.796513157	True
Aotus_nancymaae	KZ200264.1.tRNA1-ProAGG	KZ200264.1	1723996	1724068	+	12	-29.5	70.2	1.405513889	3	0.066062176	0.770045632	-4.8492	1	5	active	0.969148226	True
Aotus_nancymaae	KZ200264.1.tRNA2-ProTGG	KZ200264.1	1724302	1724374	-	6	-28.9	70.5	1.588472222	3	0.06865285	0.892857143	-4.1193	1	5	active	0.969032189	True
Aotus_nancymaae	KZ200449.1.tRNA1-GlnCTG	KZ200449.1	928058	928130	-	9	-24.7	71.5	1.553722222	6	0.04015544	0.733552032	-2.5375	0	22	active	0.987626248	True
Aotus_nancymaae	KZ200597.1.tRNA1-LeuTAG	KZ200597.1	2356971	2357053	+	3	-30.8	73.9	1.467743902	19	0.040920716	0.843373494	-3.5326	0	38	active	0.940650394	True
Aotus_nancymaae	KZ200597.1.tRNA2-LeuAAG	KZ200597.1	2247689	2247771	-	6	-30.7	74.8	1.575402439	9	0.071611253	0.843780135	-4.6243	0	42	active	0.987503143	True
Aotus_nancymaae	KZ200683.1.tRNA1-LysTTT	KZ200683.1	2926553	2926626	+	11	-21.2	76.3	0.159630137	11	0.014230272	0.142973856	-0.7074	0	0	inactive	-0.83787547	True
Aotus_nancymaae	KZ200683.1.tRNA2-GlyGCC	KZ200683.1	5644738	5644809	+	8	-26.4	81	0.899014085	11	0.015564202	0.171065494	-0.62	2	34	inactive	-0.761915953	True
Aotus_nancymaae	KZ200683.1.tRNA3-GlyGCC	KZ200683.1	5645564	5645635	+	8	-24.5	76.6	0.477225352	11	0.010376135	0.157444894	-0.40105	1	34	inactive	-0.839506875	True
Aotus_nancymaae	KZ200683.1.tRNA4-GlyGCC	KZ200683.1	5635173	5635244	-	8	-26.4	81	1.318887324	12	0.012970169	0.045967954	-0.70295	2	40	inactive	-0.703513729	True
Aotus_nancymaae	KZ200683.1.tRNA5-GlyGCC	KZ200683.1	5634466	5634537	-	8	-24.5	75.5	1.330183099	10	0.022049287	0.26371308	0.06415	1	40	active	0.66352411	True
Aotus_nancymaae	KZ200683.1.tRNA6-MetCAT	KZ200683.1	4988968	4989041	-	15	-26.7	82.7	0.637109589	4	0.058214748	0.796529408	-1.7789	0	31	active	0.98579715	True
Aotus_nancymaae	KZ200784.1.tRNA1-GlnCTG	KZ200784.1	19896	19968	+	9	-24.7	70.9	0.932428571	11	0.016839378	0.380269448	-2.08975	0	0	active	0.569875914	True
Aotus_nancymaae	KZ200784.1.tRNA2-SerTGA	KZ200784.1	21851	21933	-	4	-32.8	90.4	0.423	1	0.044757033	0.838779956	-2.324157895	0	0	active	0.958879354	True
Aotus_nancymaae	KZ200795.1.tRNA1-GluCTC	KZ200795.1	1206326	1206398	+	6	-26.4	73.2	1.337569444	7	0.020725389	0.21905805	-3.866	3	47	active	0.865391682	True
Aotus_nancymaae	KZ200795.1.tRNA2-GlyTCC	KZ200795.1	1207823	1207895	+	5	-25.1	73.8	1.325777778	7	0.019430052	0.17447657	-3.2428	3	46	active	0.819772882	True
Aotus_nancymaae	KZ200795.1.tRNA3-HisGTG	KZ200795.1	1208765	1208837	+	8	-25.5	60.1	1.311597222	26	0.054404145	0.871253609	-1.14285	3	44	active	0.983697088	True
Aotus_nancymaae	KZ200795.1.tRNA4-LysCTT	KZ200795.1	1209774	1209847	+	12	-28	87.8	1.159027397	5	0.031047865	0.36523554	-4.00125	3	42	active	0.941497854	True
Aotus_nancymaae	KZ200795.1.tRNA5-AsnGTT	KZ200795.1	1239606	1239680	+	17	-26.7	83.4	0.103945946	11	0.055555556	0.852272727	-0.99655	1	40	active	0.980527494	True
Aotus_nancymaae	KZ200795.1.tRNA6-AsnGTT	KZ200795.1	1242754	1242828	+	17	-26.4	80.9	0	12	0.045219638	0.623885918	0	1	36	active	0.788177234	True
Aotus_nancymaae	KZ200795.1.tRNA7-GluTTC	KZ200795.1	1271771	1271843	+	10	-22.8	59.5	0.054013889	2	0.06865285	0.719099277	-2.31215	0	25	active	0.909114945	True
Aotus_nancymaae	KZ200795.1.tRNA8-AsnGTT	KZ200795.1	1306090	1306164	+	17	-26.4	80.9	0	12	0.054263566	0.721153846	0	0	22	active	0.785151708	True
Aotus_nancymaae	KZ200870.1.tRNA1-AlaTGC	KZ200870.1	14240	14312	+	8	-26.5	78.7	0.782138889	3	0.047927461	0.797101449	-3.2278	1	2	active	0.974094534	True
Aotus_nancymaae	KZ200870.1.tRNA2-AspGTC	KZ200870.1	13923	13995	-	8	-26.4	66.5	0.767875	10	0.049222798	0.647390966	-2.51265	1	2	active	0.976925057	True
Aotus_nancymaae	KZ200874.1.tRNA1-SerTGA	KZ200874.1	2287534	2287616	-	4	-34.9	94	1.566560976	18	0.054987212	0.956477733	-2.57125	0	7	active	0.975550938	True
Aotus_nancymaae	KZ200874.1.tRNA2-TyrGTA	KZ200874.1	1173832	1173925	-	11	-21.9	55	?	12	0.042875158	0.640484234	?	0	30	active	0.724253466	True
Aotus_nancymaae	KZ200996.1.tRNA1-SerGCT	KZ200996.1	3317711	3317793	+	8	-30.7	89.1	1.643231707	6	0.067774936	0.956411624	-2.6191	0	56	active	0.98711698	True
Aotus_nancymaae	KZ200999.1.tRNA1-GluTTC	KZ200999.1	905621	905693	+	10	-23.6	62.7	0	108	0.010362694	0.358056266	0.02805	0	96	inactive	-0.812648618	True
Aotus_nancymaae	KZ201035.1.tRNA1-HisGTG	KZ201035.1	3373228	3373300	+	8	-25.5	60.1	1.507902778	30	0.037564767	0.626711607	0.0655	2	65	active	0.950001866	True
Aotus_nancymaae	KZ201035.1.tRNA2-HisGTG	KZ201035.1	3372478	3372550	-	8	-25.5	60.1	1.626986111	33	0.050518135	0.721153846	-0.1609	2	63	active	0.970590213	True
Aotus_nancymaae	KZ201035.1.tRNA3-HisGTG	KZ201035.1	3370666	3370738	-	8	-25.5	60.1	1.522180556	34	0.053108808	0.722826087	0.4616	2	64	active	0.968730734	True
Aotus_nancymaae	KZ201075.1.tRNA1-ValAAC	KZ201075.1	11594	11667	+	6	-24.7	79.4	-0.00090411	11	0.038809832	0.26119403	-1.241842105	0	0	active	0.655329208	True
Aotus_nancymaae	KZ201190.1.tRNA1-GluCTC	KZ201190.1	7349050	7349122	+	6	-34.1	73.5	?	4	0.038860104	0.709030814	?	0	3	active	0.975461682	True
Aotus_nancymaae	KZ201203.1.tRNA1-AsnGTT	KZ201203.1	17757	17831	+	17	-26.2	79.7	?	11	0.051679587	0.754366407	?	0	3	active	0.972708158	True
Aotus_nancymaae	KZ201203.1.tRNA2-GlnCTG	KZ201203.1	1422	1494	-	9	-24.2	71.1	-0.0175	28	0.042746114	0.560897436	-0.88675	0	3	active	0.823746259	True
Aotus_nancymaae	KZ201374.1.tRNA1-SerAGA	KZ201374.1	425047	425129	-	9	-32.8	89.6	1.47895122	12	0.061381074	0.741283806	-0.67875	0	7	active	0.970255406	True
Aotus_nancymaae	KZ201537.1.tRNA2-MetCAT	KZ201537.1	5615263	5615336	+	15	-25	82.3	1.000164384	6	0.062095731	1.029136594	-2.23325	0	28	active	0.985851051	True
Aotus_nancymaae	KZ201570.1.tRNA1-AsnGTT	KZ201570.1	17517	17591	-	17	-24.3	68.7	0	11	0.010335917	0	-0.006	0	0	inactive	-0.887010911	True
Aotus_nancymaae	KZ201810.1.tRNA1-ArgTCT	KZ201810.1	9467071	9467162	-	5	-32.6	69.9	0.278123288	39	0.048040455	0.696517413	-2.44085	0	55	active	0.969390725	True
Aotus_nancymaae	KZ201875.1.tRNA2-HisGTG	KZ201875.1	190469	190541	+	8	-18.9	54.1	0.285916667	28	0.025906736	0.302768166	-0.43455	1	35	inactive	-0.619117797	True
Aotus_nancymaae	KZ201875.1.tRNA3-GlnCTG	KZ201875.1	180704	180776	-	9	-22.8	65.6	-0.0175	28	0.022020725	0.171065494	-0.6184	1	30	inactive	-0.650451606	True
Aotus_nancymaae	KZ201976.1.tRNA2-AlaAGC	KZ201976.1	176179	176251	-	14	-29	83.3	0.105125	6	0.007772021	0	0.00685	0	15	inactive	-0.624268406	True
Aotus_nancymaae	KZ202009.1.tRNA1-ArgTCG	KZ202009.1	1676504	1676577	-	4	-29.2	74.8	1.495876712	15	0.08538163	0.90230037	-2.0344	0	61	active	0.981231163	True
Aotus_nancymaae	KZ202076.1.tRNA3-TyrGTA	KZ202076.1	11518556	11518645	-	11	-29.4	77.9	1.618616438	9	0.055766793	0.837113402	-3.54025	1	78	active	0.987680921	True
Aotus_nancymaae	KZ202076.1.tRNA4-AlaAGC	KZ202076.1	11518140	11518213	-	14	-32	59.7	1.631835616	6	0.043984476	0.514705882	-2.51745	1	78	active	0.980917138	True
Aotus_nancymaae	KZ202154.1.tRNA1-GluTTC	KZ202154.1	2306055	2306127	+	10	-26.7	71.2	1.417347222	8	0.064766839	1.098556183	-4.0568	0	0	active	0.962984046	True
Aotus_nancymaae	KZ202201.1.tRNA1-LysTTT	KZ202201.1	3062312	3062385	+	11	-25.1	84.4	0.150479452	9	0.007761966	0.215849522	-0.0395	0	3	inactive	-0.72357057	True
Aotus_nancymaae	KZ202208.1.tRNA10-GlyTCC	KZ202208.1	1277147	1277219	+	5	-25.1	73.8	1.089486111	7	0.045336788	0.418360029	-2.4551	6	106	active	0.975486823	True
Aotus_nancymaae	KZ202208.1.tRNA11-IleAAT	KZ202208.1	1283302	1283376	-	9	-25.5	81.2	1.273783784	9	0.034883721	0.324434557	-4.16115	6	98	active	0.936695952	True
Aotus_nancymaae	KZ202208.1.tRNA12-SerAGA	KZ202208.1	1282942	1283024	-	9	-32.8	89.6	1.38554878	5	0.037084399	0.744680851	-4.88385	6	98	active	0.987623752	True
Aotus_nancymaae	KZ202208.1.tRNA13-ThrAGT	KZ202208.1	1282567	1282641	-	8	-27.3	82.6	1.332067568	22	0.018087855	0.453535728	-3.2921	6	100	active	0.918837699	True
Aotus_nancymaae	KZ202208.1.tRNA14-ProCGG	KZ202208.1	1278480	1278552	-	4	-29.5	70.2	1.429013889	8	0.062176166	0.758965805	-2.88745	6	106	active	0.984464112	True
Aotus_nancymaae	KZ202208.1.tRNA15-AspGTC	KZ202208.1	1277863	1277935	-	8	-26.4	66.5	1.422986111	12	0.03626943	0.484496124	-4.69645	6	106	active	0.988759297	True
Aotus_nancymaae	KZ202208.1.tRNA16-TrpCCA	KZ202208.1	1276458	1276530	-	7	-24.5	73.4	1.100263889	12	0.033678756	0.466200466	-3.75415	6	106	active	0.988400473	True
Aotus_nancymaae	KZ202208.1.tRNA19-SerCGA	KZ202208.1	1201940	1202022	-	3	-34	95.1	1.54995122	7	0.046035806	0.707785642	-0.78475	0	85	active	0.934030277	True
Aotus_nancymaae	KZ202208.1.tRNA2-LysTTT	KZ202208.1	1184606	1184679	+	11	-27.5	87.8	1.629561644	7	0.033635188	0.560504454	-5.0892	4	91	active	0.989020082	True
Aotus_nancymaae	KZ202208.1.tRNA20-LeuTAG	KZ202208.1	1185689	1185771	-	3	-33.3	75.2	1.606560976	8	0.037084399	0.674188222	-2.69545	4	92	active	0.953952587	True
Aotus_nancymaae	KZ202208.1.tRNA3-GlnCTG	KZ202208.1	1185172	1185244	+	9	-24.7	71.5	1.375263889	5	0.020725389	0.520833333	-4.4719	4	92	active	0.968370379	True
Aotus_nancymaae	KZ202208.1.tRNA4-ArgTCT	KZ202208.1	1186293	1186381	+	5	-27.8	70.8	1.523835616	1	0.043147208	0.699259607	-0.31465	4	92	active	0.973529257	True
Aotus_nancymaae	KZ202208.1.tRNA5-GlyGCC	KZ202208.1	1191105	1191176	+	8	-26.4	81	0.993211268	9	0.054474708	0.644257703	-3.33975	4	97	active	0.988177777	True
Aotus_nancymaae	KZ202208.1.tRNA6-TrpCCA	KZ202208.1	1246936	1247008	+	7	-25.1	73.3	1.547486111	10	0.059585492	0.535553555	-1.8325	3	110	active	0.987446846	True
Aotus_nancymaae	KZ202208.1.tRNA7-SerGCT	KZ202208.1	1247433	1247515	+	8	-30.7	88.4	1.590341463	27	0.056265985	0.741997032	-3.48235	3	111	active	0.988625648	True
Aotus_nancymaae	KZ202208.1.tRNA8-ThrAGT	KZ202208.1	1247733	1247807	+	8	-27.3	82.6	0.686067568	16	0.042635659	0.739957717	-4.1061	3	112	active	0.988053701	True
Aotus_nancymaae	KZ202208.1.tRNA9-IleAAT	KZ202208.1	1248170	1248244	+	9	-25.5	81.2	1.619716216	12	0.034883721	0.658119658	-5.5991	3	113	active	0.988989434	True
Aotus_nancymaae	KZ202233.1.tRNA2-TrpCCA	KZ202233.1	296806	296878	-	7	-25.1	75.1	1.235833333	10	0.088082902	0.989985475	-2.22105	0	18	active	0.984684772	True
Aotus_nancymaae	KZ202257.1.tRNA1-ValTAC	KZ202257.1	4089037	4089110	+	4	-23.6	82.9	1.219465753	17	0.072445019	0.868544601	-5.24335	0	19	active	0.985007556	True
Aotus_nancymaae	KZ202280.1.tRNA1-LeuAAG	KZ202280.1	7967300	7967382	+	6	-30.7	74.8	1.250231707	14	0.049872123	0.844854071	-3.7834	4	22	active	0.987880119	True
Aotus_nancymaae	KZ202280.1.tRNA10-ThrTGT	KZ202280.1	8000191	8000264	-	7	-29.1	78.8	0.269383562	13	0.014230272	0.573300573	-3.20105	3	23	active	0.752124054	True
Aotus_nancymaae	KZ202280.1.tRNA11-TyrGTA	KZ202280.1	7999455	7999546	-	11	-29.6	73.2	-0.104863014	11	0.02528445	0.582524272	-4.5015	3	21	active	0.881013012	True
Aotus_nancymaae	KZ202280.1.tRNA16-ProAGG	KZ202280.1	7975616	7975688	-	12	-29.5	70.2	1.18225	2	0.033678756	0.760869565	-4.1722	8	17	active	0.906724762	True
Aotus_nancymaae	KZ202280.1.tRNA2-LeuAAG	KZ202280.1	7979551	7979633	+	6	-30.7	74.8	1.250231707	14	0.049872123	0.814765547	-3.78365	6	18	active	0.987649982	True
Aotus_nancymaae	KZ202280.1.tRNA3-LeuTAG	KZ202280.1	7994082	7994164	+	3	-29.2	73.7	0.952207317	8	0.038363171	0.712962963	-3.77915	3	20	active	0.941875609	True
Aotus_nancymaae	KZ202280.1.tRNA4-ProTGG	KZ202280.1	8002352	8002424	+	6	-29.5	74.9	0.347638889	125	0.033678756	0.550629291	-3.2489	3	23	active	0.917951115	True
Aotus_nancymaae	KZ202280.1.tRNA6-ArgACG	KZ202280.1	9883907	9883980	+	6	-25.4	67.6	1.580986301	14	0.043984476	0.877742947	-3.12805	0	78	active	0.987490406	True
Aotus_nancymaae	KZ202280.1.tRNA7-TyrGTA	KZ202280.1	8043388	8043482	-	11	-29.3	75.3	0	12	0.034005038	0.561214865	0	1	25	active	0.750629736	True
Aotus_nancymaae	KZ202280.1.tRNA9-TyrGTA	KZ202280.1	8037786	8037880	-	11	-29.1	74.3	0.321955882	12	0.031486146	0.378750615	-0.6432	1	26	active	0.807970162	True
Aotus_nancymaae	KZ202319.1.tRNA1-CysGCA	KZ202319.1	3683327	3683399	-	19	-26.1	77.3	0.987444444	9	0.007772021	0.102564103	-3.04815	0	30	inactive	-0.709116492	True
Aotus_nancymaae	KZ202344.1.tRNA2-GluTTC	KZ202344.1	1552298	1552370	-	10	-26.9	73.2	0	135	0.012953368	0.284090909	0.0765	0	38	inactive	-0.794638022	True
Aotus_nancymaae	KZ202359.1.tRNA1-IleAAT	KZ202359.1	6260862	6260936	+	9	-25.5	81.2	1.004486486	8	0.068475452	0.839591156	-3.258	0	32	active	0.986715787	True
Aotus_nancymaae	KZ202524.1.tRNA3-AspGTC	KZ202524.1	25988216	25988288	-	8	-26.4	66.5	1.628722222	12	0.04015544	0.821382008	-2.7375	0	45	active	0.987296858	True
Aotus_nancymaae	KZ202524.1.tRNA4-AspGTC	KZ202524.1	23508751	23508823	-	8	-26.4	65.4	1.060777778	11	0.045336788	0.49247221	-3.8114	1	16	active	0.987826364	True
Aotus_nancymaae	KZ202524.1.tRNA5-TrpCCA	KZ202524.1	23508022	23508094	-	7	-25.1	74.3	1.615625	4	0.04015544	0.654853621	0.6868	1	16	active	0.95423376	True
Aotus_nancymaae	KZ202628.1.tRNA1-GluCTC	KZ202628.1	1170359	1170431	-	6	-26.4	73.2	1.167819444	52	0.028497409	0.873907615	-3.68365	0	11	active	0.961190248	True
Aotus_nancymaae	KZ202868.1.tRNA1-HisGTG	KZ202868.1	2600262	2600334	+	8	-25.5	60.1	0.950986111	13	0.024611399	0.465337132	-0.1428	0	1	active	0.850854826	True
Aotus_nancymaae	KZ202962.1.tRNA1-ArgACG	KZ202962.1	2746085	2746158	-	6	-23.1	64.2	1.507150685	9	0.071151358	1.054526749	-3.15065	0	32	active	0.981444134	True
Aotus_nancymaae	KZ203018.1.tRNA1-LysCTT	KZ203018.1	3537871	3537944	+	12	-25.6	74.1	-0.014452055	322	0.006468305	0	-0.078	0	19	inactive	-0.914888654	True
Aotus_nancymaae	KZ203102.1.tRNA1-GluTTC	KZ203102.1	4370448	4370520	+	10	-26.7	71.2	1.642902778	8	0.042746114	0.891265597	-4.03725	0	12	active	0.986517156	True
Aotus_nancymaae	KZ203181.1.tRNA1-iMetCAT	KZ203181.1	606613	606685	-	15	-26.1	60.4	1.608430556	6	0.050518135	0.883838384	-2.7875	0	73	active	0.986614157	True
Aotus_nancymaae	KZ203209.1.tRNA1-ValCAC	KZ203209.1	546899	546972	+	7	-24.7	79.4	1.389136986	5	0.065976714	0.860796852	-3.2354	1	28	active	0.987795754	True
Aotus_nancymaae	KZ203209.1.tRNA3-ValAAC	KZ203209.1	551032	551105	+	6	-24.7	79.4	0.657534247	11	0.041397154	0.682261209	-3.57095	1	29	active	0.987160366	True
Aotus_nancymaae	KZ203209.1.tRNA4-ThrTGT	KZ203209.1	582745	582818	+	7	-29.7	78.8	1.53209589	8	0.084087969	1.031187123	-3.7238	1	31	active	0.986036106	True
Aotus_nancymaae	KZ203209.1.tRNA5-ProTGG	KZ203209.1	585521	585593	+	6	-29.5	70.3	0.902833333	2	0.051813472	0.845410628	-3.23445	1	31	active	0.986806358	True
Aotus_nancymaae	KZ203209.1.tRNA7-AlaTGC	KZ203209.1	562272	562344	-	8	-26.5	79.7	1.332305556	6	0.042746114	0.647634153	-3.4179	1	30	active	0.988312793	True
Aotus_nancymaae	KZ203209.1.tRNA8-LysCTT	KZ203209.1	561723	561796	-	12	-28	87.8	1.052575342	10	0.031047865	0.693597561	-3.69035	1	30	active	0.986778566	True
Aotus_nancymaae	KZ203424.1.tRNA1-IleTAT	KZ203424.1	151194	151287	+	5	-28	73.8	1.480581081	3	0.044136192	0.758861237	-0.01295	0	96	active	0.973180418	True
Aotus_nancymaae	KZ203430.1.tRNA1-AsnGTT	KZ203430.1	17642	17716	-	17	-24.1	70.8	0	12	0.034883721	0.518112156	0	0	0	active	0.693134481	True
Aotus_nancymaae	KZ203443.1.tRNA1-AsnGTT	KZ203443.1	963078	963152	+	17	-26.4	80.9	0.956148649	11	0.087855297	0.833333333	-2.04925	1	61	active	0.983655919	True
Aotus_nancymaae	KZ203443.1.tRNA2-GlyTCC	KZ203443.1	4287594	4287666	+	5	-25.1	73.8	0.980472222	2	0.07253886	1.05	-4.23565	1	34	active	0.985148992	True
Aotus_nancymaae	KZ203443.1.tRNA6-ValCAC	KZ203443.1	4288132	4288205	-	7	-22.5	80.4	0.195890411	9	0.02457956	0.147960262	-2.717	1	33	active	0.839153037	True
Aotus_nancymaae	KZ203443.1.tRNA7-PheGAA	KZ203443.1	962875	962948	-	10	-21.9	88.9	0.476342466	4	0.063389392	1.211538462	-0.82005	1	61	active	0.973243011	True
Aotus_nancymaae	KZ203456.1.tRNA1-AlaAGC	KZ203456.1	3436071	3436143	+	14	-25.4	59.4	0	115	0.023316062	0.589225589	0.0354	0	0	active	0.572695625	True
Aotus_nancymaae	KZ203698.1.tRNA1-LysTTT	KZ203698.1	30782394	30782467	+	11	-27.5	87.8	0.426013699	7	0.027166882	0.615384615	-3.1037	1	36	active	0.986142063	True
Aotus_nancymaae	KZ203698.1.tRNA2-LysTTT	KZ203698.1	30782862	30782935	-	11	-27.5	87.8	1.362739726	9	0.023285899	0.654885655	-3.44965	1	36	active	0.979893233	True
Aotus_nancymaae	KZ203698.1.tRNA3-ThrTGT	KZ203698.1	12466877	12466950	-	7	-29.1	84.1	0.471452055	12	0.027166882	0.420673077	-2.5571	0	21	active	0.970376871	True
Aotus_nancymaae	KZ203797.1.tRNA1-LeuCAG	KZ203797.1	6294278	6294361	+	5	-32.8	77.3	1.108879518	7	0.047254151	0.702811245	-1.1897	1	19	active	0.982666439	True
Aotus_nancymaae	KZ203797.1.tRNA2-LeuCAG	KZ203797.1	6294757	6294840	-	5	-32.8	77.3	1.43873494	12	0.051085568	0.71885949	-4.40245	1	18	active	0.985559536	True
Aotus_nancymaae	KZ203894.1.tRNA1-CysGCA	KZ203894.1	3327443	3327515	+	19	-26.1	77.3	0.441583333	5	0.024611399	0.678733032	-1.67205	0	29	active	0.974773202	True
Aotus_nancymaae	KZ203894.1.tRNA10-CysGCA	KZ203894.1	3400217	3400288	-	19	-28.8	59.5	0.47143662	237	0.005188067	0.064102564	-1.4388	1	12	inactive	-0.754599372	True
Aotus_nancymaae	KZ203894.1.tRNA11-CysGCA	KZ203894.1	3392527	3392599	-	19	-24.6	74	0.116888889	7	0.007772021	0.219952867	-1.2963	1	12	inactive	-0.844144751	True
Aotus_nancymaae	KZ203894.1.tRNA12-CysGCA	KZ203894.1	3378990	3379062	-	19	-19	55.7	0.276888889	139	0.002590674	0.044388079	-1.495	0	9	inactive	-0.863330582	True
Aotus_nancymaae	KZ203894.1.tRNA13-CysGCA	KZ203894.1	3356455	3356527	-	19	-22.5	79.6	0.271263889	10	0.010362694	0.211967054	-1.57735	0	27	inactive	-0.695903119	True
Aotus_nancymaae	KZ203894.1.tRNA14-CysGCA	KZ203894.1	3309821	3309893	-	19	-24.6	77.2	0.462888889	12	0.002590674	0.050717287	-1.4555	0	55	inactive	-0.800424199	True
Aotus_nancymaae	KZ203894.1.tRNA2-CysGCA	KZ203894.1	3339968	3340040	+	19	-24.6	77.2	0.067861111	21	0.00388601	0.162037037	-1.69985	0	27	inactive	-0.823379628	True
Aotus_nancymaae	KZ203894.1.tRNA4-CysGCA	KZ203894.1	3521695	3521767	+	19	-26.1	77.3	0.346236111	10	0.050518135	0.911458333	-1.34555	0	9	active	0.974361123	True
Aotus_nancymaae	KZ203894.1.tRNA6-CysGCA	KZ203894.1	3551673	3551745	+	19	-24.6	77.2	0.43325	12	0.007772021	0.22172949	-2.1726	0	17	inactive	-0.775738682	True
Aotus_nancymaae	KZ203894.1.tRNA8-CysGCA	KZ203894.1	3566250	3566322	+	19	-24.6	74	0.679208333	4	0.007772021	0.144329897	-1.43345	0	17	inactive	-0.704829665	True
Aotus_nancymaae	KZ203894.1.tRNA9-CysGCA	KZ203894.1	3591927	3591999	-	19	-24.6	81.8	0.465013889	2	0.006476684	0.076103501	-1.35835	0	21	inactive	-0.72658258	True
Aotus_nancymaae	KZ203923.1.tRNA1-ArgCCT	KZ203923.1	5640220	5640293	-	4	-27.2	65.6	1.633465753	7	0.055627426	1.285046729	-1.14015	0	25	active	0.978207507	True
Aotus_nancymaae	KZ204342.1.tRNA1-AsnGTT	KZ204342.1	80515	80589	-	17	-22	77.5	0.126527027	15	0.036175711	0.800915332	-0.9675	0	17	active	0.975924731	True
Aotus_nancymaae	KZ204342.1.tRNA2-ValCAC	KZ204342.1	35256	35329	-	7	-21.7	76	0.234041096	6	0.045278137	0.637755102	-3.271421053	0	7	active	0.977445835	True
Aotus_nancymaae	KZ204342.1.tRNA4-AsnGTT	KZ204342.1	11443	11517	-	17	-26.4	80.9	0.120716216	12	0.058139535	0.695665469	-0.94715	0	4	active	0.968772936	True
Aotus_nancymaae	KZ204371.1.tRNA1-AlaCGC	KZ204371.1	2875627	2875699	+	4	-27.6	74.4	1.666416667	16	0.038860104	0.769230769	-2.476	1	12	active	0.985659606	True
Aotus_nancymaae	KZ204371.1.tRNA2-GlyGCC	KZ204371.1	2876032	2876103	-	8	-26.4	81	1.043309859	9	0.019455253	0.286650287	-4.0846	1	12	active	0.893633096	True
Aotus_nancymaae	KZ204462.1.tRNA1-SerCGA	KZ204462.1	4973522	4973604	+	3	-29.8	89.6	1.616378049	6	0.049872123	0.648869114	-0.87825	0	119	active	0.930735945	True
Aotus_nancymaae	KZ204521.1.tRNA1-LysCTT	KZ204521.1	431366	431439	+	12	-20.1	60.1	?	179	0.01164295	0.295958059	?	0	34	inactive	-0.740407738	True
Aotus_nancymaae	KZ204842.1.tRNA1-iMetCAT	KZ204842.1	507352	507424	+	15	-26.1	60.4	0.304763889	10	0.023316062	0.296179884	-1.63505	0	33	active	0.78022783	True
Aotus_nancymaae	KZ204984.1.tRNA1-CysGCA	KZ204984.1	8084822	8084894	+	19	-24.6	77.2	1.320722222	11	0.001295337	0.072916667	-1.0519	1	4	inactive	-0.844408206	True
Aotus_nancymaae	KZ204984.1.tRNA2-CysGCA	KZ204984.1	8087495	8087567	+	19	-23.8	79.3	1.315527778	9	0.002590674	0	-1.55125	1	4	inactive	-0.755177331	True
Aotus_nancymaae	KZ205017.1.tRNA1-ThrAGT	KZ205017.1	4645667	4645741	+	8	-27.3	82.6	1.575256757	26	0.095607235	0.975269941	-1.67055	0	48	active	0.983289389	True
Aotus_nancymaae	KZ205162.1.tRNA1-IleTAT	KZ205162.1	29165	29259	+	5	-31.3	73.1	0.828054054	3	0.070528967	1.015096304	-1.68105	0	14	active	0.980950841	True
Aotus_nancymaae	KZ205162.1.tRNA10-IleAAT	KZ205162.1	209638	209712	+	9	-25.5	81.2	0.276554054	4	0.015503876	0.122100122	-1.648	2	25	inactive	-0.513795168	True
Aotus_nancymaae	KZ205162.1.tRNA11-ValTAC	KZ205162.1	219403	219476	+	4	-20.5	70.4	0.201068493	8	0.031047865	0.472334683	-1.2929	5	25	active	0.896393997	True
Aotus_nancymaae	KZ205162.1.tRNA12-IleAAT	KZ205162.1	220772	220846	+	9	-25.5	80.2	0.291445946	7	0.021963824	0.45771578	-1.877777778	4	23	active	0.970191667	True
Aotus_nancymaae	KZ205162.1.tRNA13-GlnCTG	KZ205162.1	222259	222331	+	9	-24.9	70	0.495314286	4	0.027202073	0.487616099	-2.958444444	3	23	active	0.986300972	True
Aotus_nancymaae	KZ205162.1.tRNA14-SerGCT	KZ205162.1	225058	225140	+	8	-24.8	77.5	0.005777778	3	0.020460358	0.206043956	-3.191421053	3	22	active	0.737281085	True
Aotus_nancymaae	KZ205162.1.tRNA15-SerAGA	KZ205162.1	345949	346031	+	9	-32.8	89.6	0.762439024	5	0.035805627	0.494505495	-3.11265	1	14	active	0.984183058	True
Aotus_nancymaae	KZ205162.1.tRNA16-AspGTC	KZ205162.1	346749	346821	+	8	-26.4	66.5	0.253180556	11	0.04015544	0.923769601	-1.4695	2	14	active	0.981800058	True
Aotus_nancymaae	KZ205162.1.tRNA17-SerAGA	KZ205162.1	356166	356248	+	9	-32.8	89.6	0.641695122	13	0.037084399	0.743006993	-3.53075	2	12	active	0.985081016	True
Aotus_nancymaae	KZ205162.1.tRNA18-SerAGA	KZ205162.1	358299	358381	+	9	-32.8	89.6	0.576597561	9	0.025575448	0.277722674	-2.55475	1	12	active	0.942800309	True
Aotus_nancymaae	KZ205162.1.tRNA19-GlnCTG	KZ205162.1	370372	370444	+	9	-24.7	71.5	0.825527778	4	0.03626943	0.733368256	-2.4815	1	11	active	0.982231406	True
Aotus_nancymaae	KZ205162.1.tRNA2-ProCGG	KZ205162.1	45857	45929	+	4	-29.5	70.2	0.718222222	6	0.03238342	0.262664165	-2.4916	1	21	active	0.933933483	True
Aotus_nancymaae	KZ205162.1.tRNA20-SerAGA	KZ205162.1	376723	376805	+	9	-32.5	87.9	0.8145	206	0.019181586	0.460299194	-3.56605	3	11	active	0.812221188	True
Aotus_nancymaae	KZ205162.1.tRNA21-SerTGA	KZ205162.1	385171	385249	+	4	-17.8	56.7	0.344307692	1	0.044987147	0.818850267	-2.725052632	3	11	active	0.847317155	True
Aotus_nancymaae	KZ205162.1.tRNA23-LysTTT	KZ205162.1	407573	407646	+	11	-28	86.1	0.306767123	10	0.012936611	0.184859155	-1.5807	1	5	active	0.533231311	True
Aotus_nancymaae	KZ205162.1.tRNA24-ThrCGT	KZ205162.1	585853	585926	+	5	-28.9	76.5	0.676273973	54	0.031047865	0.629084967	-1.818	1	0	active	0.95511598	True
Aotus_nancymaae	KZ205162.1.tRNA25-IleTAT	KZ205162.1	596875	596969	+	5	-34	73.1	-0.087486486	2	0.055415617	0.877926421	-1.28175	0	0	active	0.881520606	True
Aotus_nancymaae	KZ205162.1.tRNA26-PheGAA	KZ205162.1	610885	610958	+	10	-21.9	87.9	0.399123288	4	0.016817594	0.214460784	-1.5178	2	3	active	0.549441399	True
Aotus_nancymaae	KZ205162.1.tRNA29-ThrAGT	KZ205162.1	636291	636365	+	8	-25.2	80.1	0.30927027	194	0.025839793	0.494949495	-0.6713	1	3	active	0.785998049	True
Aotus_nancymaae	KZ205162.1.tRNA3-SerGCT	KZ205162.1	51967	52049	+	8	-30.1	91	0.632292683	9	0.035805627	0.896057348	-1.3799	1	21	active	0.983694892	True
Aotus_nancymaae	KZ205162.1.tRNA30-iMetCAT	KZ205162.1	665061	665133	+	15	-26.1	60.4	0.022728571	7	0.018134715	0.369978858	-4.2747	1	9	active	0.691744746	True
Aotus_nancymaae	KZ205162.1.tRNA32-IleTAT	KZ205162.1	1344903	1344997	+	5	-31.2	73.1	0.628810811	1	0.046599496	0.842426187	-2.4527	1	16	active	0.985142811	True
Aotus_nancymaae	KZ205162.1.tRNA33-GlnTTG	KZ205162.1	1392040	1392112	+	4	-27.1	70	0.435138889	14	0.037564767	0.613362541	-1.33465	1	12	active	0.978568595	True
Aotus_nancymaae	KZ205162.1.tRNA34-AlaAGC	KZ205162.1	1408704	1408776	+	14	-29.9	80.3	0.794097222	4	0.028497409	0.544111932	-1.9137	1	10	active	0.982021661	True
Aotus_nancymaae	KZ205162.1.tRNA35-AlaTGC	KZ205162.1	1439479	1439551	+	8	-21.3	68.9	0.124541667	13	0.010362694	0.315315315	-2.5512	2	5	inactive	-0.550095665	True
Aotus_nancymaae	KZ205162.1.tRNA36-ThrCGT	KZ205162.1	1444127	1444201	-	5	-25.8	77.1	0.980202703	5	0.031007752	0.757575758	-2.96705	1	5	active	0.966638646	True
Aotus_nancymaae	KZ205162.1.tRNA37-AlaTGC	KZ205162.1	1431078	1431150	-	8	-27.5	76.2	0.456763889	311	0.028497409	0.756087981	-2.6516	1	4	active	0.86374492	True
Aotus_nancymaae	KZ205162.1.tRNA38-SerGCT	KZ205162.1	1400663	1400745	-	8	-30.7	88.4	0.913121951	10	0.033248082	0.810185185	-1.8505	2	11	active	0.981621543	True
Aotus_nancymaae	KZ205162.1.tRNA39-ArgTCG	KZ205162.1	1351491	1351564	-	4	-21.3	55.5	0.970027397	8	0.043984476	0.666666667	-2.8236	1	16	active	0.789488014	True
Aotus_nancymaae	KZ205162.1.tRNA4-HisGTG	KZ205162.1	84350	84422	+	8	-25.5	60.1	0.603569444	27	0.033678756	0.623885918	-1.0318	1	26	active	0.975642339	True
Aotus_nancymaae	KZ205162.1.tRNA40-ThrCGT	KZ205162.1	1296929	1297003	-	5	-23.7	78.4	0.840878378	4	0.021963824	0.819672131	-2.4867	0	25	active	0.973858423	True
Aotus_nancymaae	KZ205162.1.tRNA41-LeuAAG	KZ205162.1	1281889	1281971	-	6	-30.7	74.8	0.235743902	58	0.042199488	0.930851064	-1.66395	1	29	active	0.942411505	True
Aotus_nancymaae	KZ205162.1.tRNA42-ThrTGT	KZ205162.1	1277411	1277485	-	7	-24	82.9	0.820297297	5	0.015503876	0.736531987	-2.4887	1	29	active	0.80946787	True
Aotus_nancymaae	KZ205162.1.tRNA43-SerGCT	KZ205162.1	1046324	1046406	-	8	-30.7	88.4	0.892829268	15	0.035805627	0.750858124	-2.43055	0	46	active	0.986237452	True
Aotus_nancymaae	KZ205162.1.tRNA44-GlyGCC	KZ205162.1	814019	814090	-	8	-26.4	81	1.067957746	14	0.051880674	1.080246914	-3.6331	1	22	active	0.982678963	True
Aotus_nancymaae	KZ205162.1.tRNA45-iMetCAT	KZ205162.1	813609	813681	-	15	-26.1	60.4	1.24175	4	0.012953368	0.297619048	-4.1964	1	22	active	0.520824797	True
Aotus_nancymaae	KZ205162.1.tRNA46-GlnTTG	KZ205162.1	673318	673390	-	4	-22	66.9	1.029319444	7	0.019430052	0.46720061	-2.8875	1	10	active	0.945218276	True
Aotus_nancymaae	KZ205162.1.tRNA47-ValAAC	KZ205162.1	651001	651074	-	6	-24.7	79.4	0.474356164	11	0.037516171	0.624442462	-2.5004	0	3	active	0.976385057	True
Aotus_nancymaae	KZ205162.1.tRNA48-ValCAC	KZ205162.1	638727	638800	-	7	-24.2	79	-0.821728571	15	0.032341527	0.49088359	-1.162210526	1	3	active	0.890643973	True
Aotus_nancymaae	KZ205162.1.tRNA5-ThrAGT	KZ205162.1	88175	88249	+	8	-27.8	80.6	1.417216216	11	0.012919897	0.684485007	-2.3713	1	26	active	0.853511185	True
Aotus_nancymaae	KZ205162.1.tRNA50-ThrAGT	KZ205162.1	625812	625886	-	8	-27	81.4	0.549162162	19	0.011627907	0.17369727	-2.66895	2	3	active	0.611185009	True
Aotus_nancymaae	KZ205162.1.tRNA51-ValAAC	KZ205162.1	621929	622002	-	6	-24.7	79.4	0.320835616	17	0.034928849	0.41322314	-2.955263158	2	3	active	0.968726759	True
Aotus_nancymaae	KZ205162.1.tRNA53-ArgACG	KZ205162.1	615954	616027	-	6	-23.1	64.2	0.718643836	12	0.020698577	0.17921147	-3.08365	4	3	active	0.834324709	True
Aotus_nancymaae	KZ205162.1.tRNA54-ValAAC	KZ205162.1	607138	607211	-	6	-23.3	74.8	0.478589041	11	0.020698577	0.239316239	-1.8855	2	3	active	0.826459451	True
Aotus_nancymaae	KZ205162.1.tRNA56-LeuCAA	KZ205162.1	579660	579767	-	5	-38.8	75.9	0.20847619	5	0.029739777	0.576923077	-1.0188	3	0	active	0.957615447	True
Aotus_nancymaae	KZ205162.1.tRNA57-iMetCAT	KZ205162.1	574352	574424	-	15	-26.1	60.4	0.677055556	8	0.028497409	0.494001411	-1.56505	2	0	active	0.968997251	True
Aotus_nancymaae	KZ205162.1.tRNA58-LysTTT	KZ205162.1	573356	573429	-	11	-26	86.8	0.320205479	11	0.025873221	0.874417055	-1.8795	2	0	active	0.966974928	True
Aotus_nancymaae	KZ205162.1.tRNA59-LeuCAA	KZ205162.1	402070	402176	-	5	-40.6	75.6	0.094142857	8	0.034739454	0.678294574	-0.4754	2	5	active	0.873550023	True
Aotus_nancymaae	KZ205162.1.tRNA6-SerCGA	KZ205162.1	117858	117940	+	3	-34	94	0.676378049	13	0.017902813	0.131901262	-1.82325	3	27	active	0.739707069	True
Aotus_nancymaae	KZ205162.1.tRNA60-SerAGA	KZ205162.1	391993	392075	-	9	-32.8	89.6	0.642280488	7	0.042199488	0.662010767	-1.32035	3	9	active	0.978073505	True
Aotus_nancymaae	KZ205162.1.tRNA62-SerAGA	KZ205162.1	383357	383439	-	9	-32.8	90.3	0.827280488	92	0.030690537	0.576131687	-3.2726	3	11	active	0.950831306	True
Aotus_nancymaae	KZ205162.1.tRNA65-iMetCAT	KZ205162.1	247382	247454	-	15	-26.1	60.4	0.174444444	4	0.029792746	0.736603529	-0.9546	0	24	active	0.962434927	True
Aotus_nancymaae	KZ205162.1.tRNA66-IleAAT	KZ205162.1	210714	210788	-	9	-25.5	81.2	0.288310811	4	0.04005168	0.614466292	-1.20495	3	25	active	0.982844655	True
Aotus_nancymaae	KZ205162.1.tRNA68-LeuTAA	KZ205162.1	127919	128002	-	2	-33.8	88.2	0.296061728	14	0.028097063	0.456323338	-1.775055556	2	34	active	0.932192405	True
Aotus_nancymaae	KZ205162.1.tRNA69-ValCAC	KZ205162.1	113177	113251	-	7	-10.1	53.2	0.53827027	25	0.034883721	0.343137255	-2.1297	2	24	inactive	-0.500910991	True
Aotus_nancymaae	KZ205162.1.tRNA7-ArgACG	KZ205162.1	121778	121851	+	6	-23.1	64.2	0.687493151	8	0.033635188	0.901639344	-2.807157895	3	31	active	0.986028555	True
Aotus_nancymaae	KZ205162.1.tRNA70-IleAAT	KZ205162.1	101025	101099	-	9	-25.5	80.3	0.524635135	15	0.036175711	0.729166667	-1.90475	0	25	active	0.985052625	True
Aotus_nancymaae	KZ205162.1.tRNA73-AlaAGC	KZ205162.1	98	171	-	14	-26.3	60	-0.090438356	99	0.011516315	0.122100122	-1.38755	0	10	inactive	-0.826529028	True
Aotus_nancymaae	KZ205330.1.tRNA1-LeuCAA	KZ205330.1	1650035	1650141	+	5	-42.6	73.6	0.886380952	6	0.086848635	1.194176966	-1.59775	1	29	active	0.974509384	True
Aotus_nancymaae	KZ205330.1.tRNA2-GluCTC	KZ205330.1	1650433	1650505	+	6	-26.4	73.2	0.976805556	5	0.04015544	0.823045267	-4.0418	1	29	active	0.987174574	True
Aotus_nancymaae	KZ205585.1.tRNA1-AsnGTT	KZ205585.1	864328	864402	-	17	-23.9	61.4	?	50	0.0374677	0.310386875	?	0	18	active	0.790329341	True
Aotus_nancymaae	KZ205780.1.tRNA1-ProTGG	KZ205780.1	1472577	1472649	+	6	-29.5	70.3	0.111416667	0	0.046632124	0.555555556	-1.8908	6	44	active	0.985372022	True
Aotus_nancymaae	KZ205780.1.tRNA11-LysCTT	KZ205780.1	1481896	1481969	-	12	-28	87.8	0.315219178	4	0.019404916	0.215146299	-2.5118	4	41	active	0.78540629	True
Aotus_nancymaae	KZ205780.1.tRNA12-ProCGG	KZ205780.1	1477915	1477987	-	4	-29.5	70.2	0.200458333	12	0.042746114	0.505436629	-0.74725	5	44	active	0.972490437	True
Aotus_nancymaae	KZ205780.1.tRNA14-ProAGG	KZ205780.1	1469315	1469387	-	12	-29.5	70.2	0.513777778	35	0.053108808	0.664767331	-3.84715	5	44	active	0.985269363	True
Aotus_nancymaae	KZ205780.1.tRNA16-ProAGG	KZ205780.1	1467476	1467548	-	12	-29.5	70.2	0.513777778	35	0.046632124	0.654205607	-3.9483	4	41	active	0.9854995	True
Aotus_nancymaae	KZ205780.1.tRNA2-ProAGG	KZ205780.1	1473940	1474012	+	12	-29.5	70.2	0.552472222	3	0.045336788	0.551801802	-3.96255	6	44	active	0.987796946	True
Aotus_nancymaae	KZ205780.1.tRNA3-SupTCA	KZ205780.1	1475687	1475758	+	2	-29.1	72.7	0.202	4	0.027237354	0.39717564	-1.0342	6	44	active	0.861942272	True
Aotus_nancymaae	KZ205780.1.tRNA4-LysCTT	KZ205780.1	1493109	1493182	+	12	-28	87.8	0.522342466	4	0.054333765	0.842318059	-3.71065	4	45	active	0.987725	True
Aotus_nancymaae	KZ205780.1.tRNA6-ArgCCG	KZ205780.1	1500240	1500313	-	4	-27.1	67	1.346369863	14	0.07373868	0.837191358	-4.9533	4	43	active	0.98789557	True
Aotus_nancymaae	KZ205780.1.tRNA7-ArgCCG	KZ205780.1	1498936	1499009	-	4	-27.1	67	1.346369863	14	0.076326003	0.846774194	-4.9533	4	42	active	0.986307093	True
Aotus_nancymaae	KZ205780.1.tRNA8-UndetNNN	KZ205780.1	1495528	1495600	-	2	-31.2	56.1	0.919458333	11	0.03238342	0.643382353	-2.76275	4	43	active	0.794599184	True
Aotus_nancymaae	KZ205780.1.tRNA9-ProTGG	KZ205780.1	1491972	1492044	-	6	-29.5	70.3	0.841458333	3	0.063471503	0.620689655	-5.20615	4	46	active	0.988183946	True
Aotus_nancymaae	KZ205785.1.tRNA1-AsnGTT	KZ205785.1	62031	62105	+	17	-22.1	57.7	0.103945946	11	0.042635659	0.676328502	-0.99655	1	5	active	0.873631646	True
Aotus_nancymaae	KZ205785.1.tRNA2-AsnGTT	KZ205785.1	66944	67024	+	17	-19.8	59.4	0	12	0.042307692	0.684261975	0	1	6	active	0.577123328	True
Aotus_nancymaae	KZ205785.1.tRNA3-GlnCTG	KZ205785.1	43341	43413	-	9	-24.2	71.1	-0.056638889	28	0.031088083	0.518518519	-0.7394	0	3	active	0.733281813	True
Aotus_nancymaae	KZ205987.1.tRNA1-LeuCAG	KZ205987.1	184562	184645	+	5	-32.8	77.3	1.02913253	7	0.043422733	0.861538462	-3.71275	4	29	active	0.986574699	True
Aotus_nancymaae	KZ205987.1.tRNA10-GlyTCC	KZ205987.1	183529	183601	-	5	-25.1	73.8	0.972888889	7	0.041450777	0.743395725	-3.23725	4	29	active	0.987314783	True
Aotus_nancymaae	KZ205987.1.tRNA11-AspGTC	KZ205987.1	182539	182611	-	8	-26.4	66.5	0.655847222	9	0.016839378	0.282828283	-2.0907	4	29	active	0.551040582	True
Aotus_nancymaae	KZ205987.1.tRNA12-AsnGTT	KZ205987.1	177027	177101	-	17	-26.4	81.5	1.205283784	8	0.04005168	0.541795666	-4.24675	3	30	active	0.988933096	True
Aotus_nancymaae	KZ205987.1.tRNA2-GlyGCC	KZ205987.1	190944	191015	+	8	-26.4	81	1.150225352	10	0.053177691	0.83541714	-2.8039	3	30	active	0.988222508	True
Aotus_nancymaae	KZ205987.1.tRNA3-AspGTC	KZ205987.1	225041	225113	+	8	-26.4	66.5	0.471569444	10	0.115284974	1.138638639	-0.3048	2	26	active	0.925769245	True
Aotus_nancymaae	KZ205987.1.tRNA4-GlyTCC	KZ205987.1	225752	225824	+	5	-25.1	73.8	0.300027778	10	0.101036269	0.952518819	-0.3384	2	26	active	0.953444807	True
Aotus_nancymaae	KZ205987.1.tRNA6-ValCAC	KZ205987.1	360202	360275	+	7	-24.7	79.4	1.136109589	9	0.08538163	0.795891163	-2.57005	0	17	active	0.98572483	True
Aotus_nancymaae	KZ205987.1.tRNA7-ArgTCT	KZ205987.1	2368323	2368397	+	5	-27.7	78.5	1.611905405	19	0.021963824	0.303217822	1.4991	0	16	active	0.787449604	True
Aotus_nancymaae	KZ205987.1.tRNA9-LeuCAG	KZ205987.1	224411	224494	-	5	-35.7	78.2	0.337204819	8	0.102171137	1.183190534	-0.028	2	25	active	0.922313228	True
Aotus_nancymaae	KZ206261.1.tRNA1-AsnGTT	KZ206261.1	949085	949159	+	17	-26.4	80.9	1.27377027	11	0.087855297	0.968615674	-1.9539	0	15	active	0.979711873	True
Aotus_nancymaae	KZ206423.1.tRNA11-SerGCT	KZ206423.1	332839	332921	+	8	-30.7	88.4	1.389512195	24	0.029411765	0.780379041	-4.51295	4	35	active	0.987710835	True
Aotus_nancymaae	KZ206423.1.tRNA12-iMetCAT	KZ206423.1	342617	342689	-	15	-26.1	60.4	1.127486111	14	0.018134715	0.418160096	-4.6266	1	38	active	0.890017816	True
Aotus_nancymaae	KZ206423.1.tRNA13-ArgTCG	KZ206423.1	315406	315479	-	4	-25.9	70.3	0.744438356	15	0.041397154	0.983146067	-3.18535	4	41	active	0.986703787	True
Aotus_nancymaae	KZ206423.1.tRNA14-SerAGA	KZ206423.1	310092	310174	-	9	-32.8	89.6	0.948463415	53	0.040920716	0.894813733	-2.5125	5	43	active	0.955921086	True
Aotus_nancymaae	KZ206423.1.tRNA15-ArgACG	KZ206423.1	309591	309664	-	6	-25.4	67.6	0.909164384	5	0.027166882	0.812693498	-3.78525	5	43	active	0.986890172	True
Aotus_nancymaae	KZ206423.1.tRNA16-LeuCAG	KZ206423.1	138608	138691	-	5	-35.7	78.2	1.348373494	8	0.037037037	0.777873812	-5.29715	2	50	active	0.985755629	True
Aotus_nancymaae	KZ206423.1.tRNA17-ArgACG	KZ206423.1	128624	128697	-	6	-25.4	67.6	1.277547945	15	0.063389392	0.875	-2.67145	3	45	active	0.988278846	True
Aotus_nancymaae	KZ206423.1.tRNA18-ValCAC	KZ206423.1	128062	128135	-	7	-24.7	79.4	1.282424658	4	0.071151358	0.917602996	-3.81595	2	45	active	0.988846779	True
Aotus_nancymaae	KZ206423.1.tRNA19-AlaCGC	KZ206423.1	112149	112221	-	4	-26.5	79.7	1.426597222	5	0.025906736	0.511695906	-3.7854	5	34	active	0.984294971	True
Aotus_nancymaae	KZ206423.1.tRNA2-AlaAGC	KZ206423.1	102497	102570	+	14	-29.6	58.9	1.068780822	1	0.040103493	0.823045267	-2.29095	7	31	active	0.967672574	True
Aotus_nancymaae	KZ206423.1.tRNA20-IleAAT	KZ206423.1	111518	111592	-	9	-25.5	81.2	1.329878378	6	0.031007752	0.70915454	-3.45365	5	34	active	0.988028392	True
Aotus_nancymaae	KZ206423.1.tRNA21-ProAGG	KZ206423.1	110637	110709	-	12	-29.5	70.2	1.413652778	3	0.031088083	0.652985075	-3.8103	5	34	active	0.987850653	True
Aotus_nancymaae	KZ206423.1.tRNA22-LysCTT	KZ206423.1	109339	109412	-	12	-28	87.8	0.979465753	5	0.014230272	0.224358974	-4.4791	5	32	active	0.616355496	True
Aotus_nancymaae	KZ206423.1.tRNA23-TyrGTA	KZ206423.1	104635	104724	-	11	-30.5	78	1.514575342	8	0.032953105	0.693221831	-3.51535	6	31	active	0.98852522	True
Aotus_nancymaae	KZ206423.1.tRNA25-TyrGTA	KZ206423.1	95521	95610	-	11	-18.2	57.9	0.651287671	6	0.030418251	0.36505867	-2.30135	3	27	active	0.633723485	True
Aotus_nancymaae	KZ206423.1.tRNA26-TyrGTA	KZ206423.1	92762	92851	-	11	-29.3	74.9	0.810054795	6	0.022813688	0.291991101	-2.18505	2	27	active	0.940156456	True
Aotus_nancymaae	KZ206423.1.tRNA27-AlaAGC	KZ206423.1	6221	6294	-	14	-26.3	60	-0.090438356	203	0.009055627	0.05976776	-1.6852	0	5	inactive	-0.842988897	True
Aotus_nancymaae	KZ206423.1.tRNA3-ThrAGT	KZ206423.1	133119	133193	+	8	-25.3	78.6	1.547148649	7	0.033591731	0.772727273	-3.66565	3	46	active	0.989173342	True
Aotus_nancymaae	KZ206423.1.tRNA4-TrpCCA	KZ206423.1	303772	303844	+	7	-24.5	73.4	1.269680556	4	0.029792746	0.554298643	-2.87925	3	46	active	0.98751568	True
Aotus_nancymaae	KZ206423.1.tRNA5-iMetCAT	KZ206423.1	304906	304978	+	15	-26.1	60.4	0.378319444	6	0.015544041	0.307287094	-2.3153	3	46	inactive	-0.617060654	True
Aotus_nancymaae	KZ206423.1.tRNA6-TrpCCA	KZ206423.1	319123	319195	+	7	-24.5	69	0.809777778	12	0.031088083	0.864838152	-2.7946	6	37	active	0.985806552	True
Aotus_nancymaae	KZ206423.1.tRNA7-iMetCAT	KZ206423.1	325056	325128	+	15	-26.1	60.4	1.066305556	13	0.034974093	0.845070423	-2.7968	5	37	active	0.9871821	True
Aotus_nancymaae	KZ206423.1.tRNA8-SerTGA	KZ206423.1	325604	325686	+	4	-32.8	90.4	1.360585366	8	0.023017903	0.462962963	-3.4346	4	37	active	0.979678775	True
Aotus_nancymaae	KZ206423.1.tRNA9-GlnTTG	KZ206423.1	326468	326540	+	4	-22.2	69	0.730736111	7	0.015544041	0.498102467	-2.3631	4	38	active	0.704671618	True
Aotus_nancymaae	KZ206493.1.tRNA1-LysCTT	KZ206493.1	627477	627550	+	12	-18.3	65.9	0	7	0.034928849	0.324434557	0.0615	0	36	inactive	-0.659420873	True
Aotus_nancymaae	KZ206671.1.tRNA1-PheGAA	KZ206671.1	4372876	4372949	+	10	-21.9	88.9	1.067863014	5	0.076326003	0.777777778	-2.6072	0	22	active	0.985541092	True
Aotus_nancymaae	KZ206857.1.tRNA1-ThrCGT	KZ206857.1	417676	417748	-	5	-27	79.6	1.483972222	22	0.095854922	0.953895072	0.1328	0	17	active	0.968347631	True
Aotus_nancymaae	KZ206898.1.tRNA1-MetCAT	KZ206898.1	4543	4616	-	15	-26.7	82.7	0.43260274	2	0.040103493	0.602503912	-3.2104	0	0	active	0.967425783	True
Aotus_nancymaae	KZ206965.1.tRNA3-ProAGG	KZ206965.1	26614081	26614153	+	12	-29.5	70.2	1.497555556	2	0.044041451	0.788288288	-4.26415	1	13	active	0.986817101	True
Aotus_nancymaae	KZ206965.1.tRNA4-ProCGG	KZ206965.1	26614811	26614883	-	4	-29.5	70.2	1.188986111	4	0.081606218	1.064814815	-0.87135	1	13	active	0.966840478	True
Aotus_nancymaae	KZ207065.1.tRNA1-PheGAA	KZ207065.1	244166	244239	+	10	-10	67.4	-0.058767123	4	0.023285899	0.255567725	0.10795	0	47	inactive	-0.713097445	True
Aotus_nancymaae	KZ207330.1.tRNA1-LysCTT	KZ207330.1	12196505	12196582	-	12	-18.3	60.4	-1.087	189	0.011583012	0.13478819	-0.25625	0	37	inactive	-0.932098034	True
Aotus_nancymaae	KZ207363.1.tRNA1-SeCTCA	KZ207363.1	2820472	2820559	+	2	-37.5	147.4	1.448183908	29	0.044472681	0.854700855	-4.82785	0	51	active	0.926478943	True
Aotus_nancymaae	KZ207725.1.tRNA1-SerGCT	KZ207725.1	1056102	1056184	-	8	-30.7	88.4	1.569146341	10	0.043478261	0.828402367	-1.1602	0	32	active	0.985399875	True
Aotus_nancymaae	KZ208598.1.tRNA1-GluTTC	KZ208598.1	1224179	1224251	+	10	-24.8	70.4	1.543222222	13	0.085492228	0.951646091	-1.75925	0	25	active	0.984094681	True
Bos_taurus	tRNA-Ala-AGC-1-1	chr23	30049199	30049271	-	29	-29.9	80.3	0.749833333	4	0.034974093	0.68627451	-1.9322	5	12	active	0.920046358	True
Bos_taurus	tRNA-Ala-AGC-10-1	chr7	60871677	60871749	+	29	-20.6	66.7	0.006194444	351	0.006476684	0.102040816	-0.1933	0	25	inactive	-0.947681647	True
Bos_taurus	tRNA-Ala-AGC-11-1	chr23	31296523	31296596	+	29	-27.7	54.6	1.052136986	156	0.025873221	0.609543713	-2.76495	3	34	active	0.61569327	True
Bos_taurus	tRNA-Ala-AGC-12-1	chr18	23631559	23631632	+	29	-25.8	52.3	0.122616438	8	0.009055627	0.050857309	-0.3847	0	10	inactive	-0.896526201	True
Bos_taurus	tRNA-Ala-AGC-12-2	chr29	46581852	46581925	-	29	-25.8	52.3	0.768794521	8	0.041397154	0.709219858	-2.14545	0	11	active	0.725587883	True
Bos_taurus	tRNA-Ala-AGC-13-1	chr23	31191482	31191555	+	29	-28.6	55.8	0.301863014	1	0.029754204	0.382872324	-1.61755	6	9	active	0.627262388	True
Bos_taurus	tRNA-Ala-AGC-14-1	chr18	51973770	51973843	-	29	-21	62.5	-0.094260274	115	0.016817594	0.568181818	-0.1061	0	48	inactive	-0.590421315	True
Bos_taurus	tRNA-Ala-AGC-15-1	chr18	29339448	29339519	+	29	-24.4	57.2	0.033267606	279	0.010376135	0.094060736	-0.17945	0	1	inactive	-0.932244179	True
Bos_taurus	tRNA-Ala-AGC-16-1	chr3	86506666	86506737	-	29	-21.8	61.3	-0.148242424	275	0.002594034	0.057189542	-0.1121875	0	29	inactive	-0.940855688	True
Bos_taurus	tRNA-Ala-AGC-17-1	chr21	68579157	68579229	+	29	-21.8	53.3	-0.207625	151	0.018134715	0.282258065	-0.0585	0	100	inactive	-0.810471657	True
Bos_taurus	tRNA-Ala-AGC-2-1	chr23	29976891	29976963	+	29	-30.4	84.2	0.405277778	64	0.045336788	0.518867925	-0.9157	4	14	active	0.878130253	True
Bos_taurus	tRNA-Ala-AGC-3-1	chr1	95174245	95174317	+	29	-31.9	84.7	0.094361111	57	0.024611399	0.422705314	-0.29825	3	18	active	0.661718073	True
Bos_taurus	tRNA-Ala-AGC-3-2	chr23	29937385	29937457	+	29	-31.9	84.7	1.068222222	1	0.041450777	0.797720798	-3.1318	2	16	active	0.933046718	True
Bos_taurus	tRNA-Ala-AGC-3-3	chr23	29945278	29945350	+	29	-31.9	84.7	0.93625	1	0.023316062	0.468331847	-4.60565	2	14	active	0.852809025	True
Bos_taurus	tRNA-Ala-AGC-3-4	chr23	30004044	30004116	-	29	-31.9	84.7	0.124444444	79	0.022020725	0.220541903	-0.3701	4	1	active	0.501749823	True
Bos_taurus	tRNA-Ala-AGC-3-5	chr23	30011518	30011590	-	29	-31.9	84.7	0.192944444	44	0.016839378	0.406976744	0.0435	7	2	active	0.512557498	True
Bos_taurus	tRNA-Ala-AGC-3-6	chr23	30012419	30012491	+	29	-31.9	84.7	0.045152778	123	0.019430052	0.321469575	-0.77665	7	3	inactive	-0.53605932	True
Bos_taurus	tRNA-Ala-AGC-3-7	chr23	30017823	30017895	+	29	-31.9	84.7	0.235055556	119	0.027202073	0.449293967	-1.1175	6	5	active	0.768156461	True
Bos_taurus	tRNA-Ala-AGC-3-8	chr23	30791063	30791135	+	29	-31.9	84.7	0.124472222	8	0.033678756	0.480769231	-0.5705	4	30	active	0.819292653	True
Bos_taurus	tRNA-Ala-AGC-4-1	chr18	54151835	54151907	-	29	-27.5	83	0.123861111	12	0.015544041	0.364583333	-0.58225	0	37	inactive	-0.687530107	True
Bos_taurus	tRNA-Ala-AGC-4-2	chr19	56483666	56483738	-	29	-27.5	83	-0.139138889	8	0.006476684	0	-0.97765	0	105	inactive	-0.743619467	True
Bos_taurus	tRNA-Ala-AGC-5-1	chr23	30033616	30033688	+	29	-23.6	76.1	0.875902778	3	0.023316062	0.452898551	-4.02125	3	6	active	0.835611352	True
Bos_taurus	tRNA-Ala-AGC-6-1	chr26	26720451	26720523	-	29	-16.1	64.3	-0.038527778	351	0.012953368	0.472334683	-0.059	0	0	inactive	-0.753002722	True
Bos_taurus	tRNA-Ala-AGC-7-1	chr7	48654603	48654675	+	29	-27.4	80.2	-0.021180556	351	0.007772021	0.057320668	-0.12105	0	5	inactive	-0.793054831	True
Bos_taurus	tRNA-Ala-AGC-8-1	chr23	31175614	31175687	+	29	-26.2	55.2	0.458780822	1	0.010349288	0.129749768	-1.385157895	5	11	inactive	-0.789887349	True
Bos_taurus	tRNA-Ala-AGC-8-2	chr23	31187063	31187136	+	29	-26.2	55.2	0.458726027	1	0.006468305	0	-1.3469	6	12	inactive	-0.830259533	True
Bos_taurus	tRNA-Ala-AGC-8-3	chr23	31198780	31198853	-	29	-26.2	55.2	0.123767123	1	0.006468305	0	-0.05935	4	9	inactive	-0.82612913	True
Bos_taurus	tRNA-Ala-AGC-9-1	chr11	72573764	72573837	-	29	-32	59.7	1.609493151	5	0.054333765	0.786264442	-2.58385	1	82	active	0.94922622	True
Bos_taurus	tRNA-Ala-AGC-9-2	chr14	32154327	32154400	+	29	-32	59.7	1.616712329	1	0.053040103	0.977777778	-1.25535	2	19	active	0.92752043	True
Bos_taurus	tRNA-Ala-CGC-1-1	chr6	38552142	38552214	-	9	-26.5	79.7	0.096305556	69	0.014248705	0.184210526	-0.2386	0	24	inactive	-0.720792377	True
Bos_taurus	tRNA-Ala-CGC-1-2	chr23	30027675	30027747	+	9	-26.5	79.7	1.125208333	11	0.019430052	0.505597689	-2.86355	4	6	active	0.950753584	True
Bos_taurus	tRNA-Ala-CGC-1-3	chr23	31313434	31313506	-	9	-26.5	79.7	1.40525	5	0.029792746	0.580431177	-3.8717	4	47	active	0.988258529	True
Bos_taurus	tRNA-Ala-CGC-2-1	chr23	29949903	29949975	+	9	-29.9	80.3	-0.057180556	18	0.018134715	0.42997543	-1.11315	2	14	active	0.706585242	True
Bos_taurus	tRNA-Ala-CGC-3-1	chr2	39950590	39950662	-	9	-27.6	74.4	1.605972222	15	0.059585492	0.834160874	-2.36695	1	15	active	0.986010612	True
Bos_taurus	tRNA-Ala-CGC-4-1	chr23	30019749	30019821	+	9	-23.8	72.8	0.041388889	6	0.007772021	0	-0.8472	6	5	inactive	-0.796645895	True
Bos_taurus	tRNA-Ala-CGC-5-1	chr23	29983376	29983448	-	9	-25.7	75.1	0.267527778	9	0.027202073	0.500984076	-5.19925	4	13	active	0.984922323	True
Bos_taurus	tRNA-Ala-CGC-6-1	chr24	4954491	4954563	+	9	-24.5	77.9	-0.217724638	27	0.009067358	0.355691057	-1.703	0	0	inactive	-0.643936374	True
Bos_taurus	tRNA-Ala-CGC-7-1	chr4	103838543	103838616	-	9	-12.1	58.3	0.001205479	314	0.010349288	0.194444444	0.09305	0	21	inactive	-0.952083189	True
Bos_taurus	tRNA-Ala-TGC-1-1	chr23	30046778	30046850	+	18	-26.5	79.7	0.454194444	58	0.019430052	0.737704918	-2.02445	4	10	active	0.91257412	True
Bos_taurus	tRNA-Ala-TGC-10-1	chr23	39054566	39054638	-	18	-24.3	64.4	-0.021680556	10	0.009067358	0.221706081	-0.06235	0	7	inactive	-0.895233228	True
Bos_taurus	tRNA-Ala-TGC-11-1	chrX	29584847	29584919	-	18	-15.9	54.8	0.183069444	58	0.00388601	0.268199234	-0.377625	0	0	inactive	-0.840553534	True
Bos_taurus	tRNA-Ala-TGC-12-1	chr23	17653317	17653390	+	18	-25.8	71.4	-0.051561644	36	0.006468305	0.195603577	-0.1161	0	50	inactive	-0.920392346	True
Bos_taurus	tRNA-Ala-TGC-13-1	chr26	11257613	11257686	+	18	-18.4	54.1	-0.096452055	213	0.009055627	0	-0.2026	0	13	inactive	-0.958127394	True
Bos_taurus	tRNA-Ala-TGC-14-1	chr2	23006990	23007062	+	18	-17.7	54.6	0.051347222	84	0.002590674	0	-0.06345	0	3	inactive	-0.899631158	True
Bos_taurus	tRNA-Ala-TGC-15-1	chr6	47008905	47008980	+	18	-19.1	60.1	0.102706667	210	0.006451613	0	-0.32005	0	5	inactive	-0.885767913	True
Bos_taurus	tRNA-Ala-TGC-2-1	chr7	41735750	41735822	+	18	-26.5	79.7	1.356833333	19	0.045336788	0.780532599	-4.10225	2	38	active	0.988989434	True
Bos_taurus	tRNA-Ala-TGC-2-2	chr17	53134697	53134769	+	18	-26.5	79.7	1.338986111	33	0.016839378	0.320659643	-3.00245	4	35	active	0.598556466	True
Bos_taurus	tRNA-Ala-TGC-2-3	chr23	29987616	29987688	-	18	-26.5	79.7	0.344041667	2	0.010362694	0.238636364	-1.0192	3	11	inactive	-0.691722148	True
Bos_taurus	tRNA-Ala-TGC-3-1	chr3	107627902	107627974	-	18	-26.5	78.7	0.123972222	2	0.006476684	0	-0.3422	0	24	inactive	-0.799486624	True
Bos_taurus	tRNA-Ala-TGC-3-2	chr17	53127888	53127960	-	18	-26.5	78.7	0.755736111	2	0.046632124	0.946643718	-3.14695	4	35	active	0.987687783	True
Bos_taurus	tRNA-Ala-TGC-4-1	chr23	29966806	29966878	+	18	-28.5	79.5	0.204708333	13	0.022020725	0.425347222	-2.51315	4	14	active	0.965043792	True
Bos_taurus	tRNA-Ala-TGC-5-1	chr6	110935375	110935447	-	18	-24.9	77	0.077763889	54	0.007772021	0.140336808	-0.46375	0	0	inactive	-0.881626658	True
Bos_taurus	tRNA-Ala-TGC-6-1	chr5	68229674	68229746	-	18	-25.5	77.3	0.259152778	52	0.005181347	0.25728988	-0.3329	0	19	inactive	-0.79331644	True
Bos_taurus	tRNA-Ala-TGC-7-1	chr6	93461518	93461590	+	18	-26.4	77.4	0.056916667	2	0.020725389	0.416480738	-0.17785	0	7	active	0.60618385	True
Bos_taurus	tRNA-Ala-TGC-8-1	chr23	30042697	30042769	-	18	-24.3	81.8	0.057347222	29	0.024611399	0.694444444	-0.2784	5	9	active	0.714521839	True
Bos_taurus	tRNA-Ala-TGC-9-1	chr9	17473020	17473092	+	18	-27.5	77.4	-0.269277778	7	0.007772021	0.189873418	-0.676	0	0	inactive	-0.776322914	True
Bos_taurus	tRNA-Arg-ACG-1-1	chr10	21752357	21752430	-	9	-25.4	67.6	1.609013699	14	0.043984476	0.913937548	-3.3412	0	97	active	0.987680882	True
Bos_taurus	tRNA-Arg-ACG-1-2	chr23	31168993	31169066	+	9	-25.4	67.6	0.299506849	42	0.032341527	0.616438356	-1.38585	4	10	active	0.962951457	True
Bos_taurus	tRNA-Arg-ACG-1-3	chr23	31331615	31331688	-	9	-25.4	67.6	1.25969863	16	0.045278137	0.725609756	-2.7453	3	50	active	0.988605409	True
Bos_taurus	tRNA-Arg-ACG-1-4	chr23	31438377	31438450	-	9	-25.4	67.6	0.89330137	3	0.025873221	0.823529412	-3.92705	8	46	active	0.916139417	True
Bos_taurus	tRNA-Arg-ACG-2-1	chr22	54252475	54252548	+	9	-23.1	64.2	1.489260274	8	0.076326003	1.055170335	-3.30855	0	37	active	0.979855657	True
Bos_taurus	tRNA-Arg-ACG-2-2	chr23	30819035	30819108	+	9	-23.1	64.2	0.724027397	10	0.02457956	0.523429711	-3.278578947	6	20	active	0.971116463	True
Bos_taurus	tRNA-Arg-ACG-2-5	chr23	31086207	31086280	-	9	-23.1	64.2	0.682041096	11	0.025873221	0.705645161	-2.93955	3	19	active	0.98309518	True
Bos_taurus	tRNA-Arg-CCG-1-1	chr23	29932825	29932898	-	10	-27.1	67	0.413013699	2	0.029754204	0.412411626	-1.08885	2	18	active	0.915811071	True
Bos_taurus	tRNA-Arg-CCG-1-2	chr23	29971501	29971574	+	10	-27.1	67	0.517945205	32	0.027166882	0.354161396	-1.5409	4	14	active	0.92732375	True
Bos_taurus	tRNA-Arg-CCG-1-3	chr23	29971885	29971958	+	10	-27.1	67	0.517945205	32	0.027166882	1.080246914	-1.5409	4	14	active	0.972833793	True
Bos_taurus	tRNA-Arg-CCG-1-4	chr25	2584568	2584641	+	10	-27.1	67	1.333739726	13	0.067270375	0.810536981	-5.28385	3	47	active	0.988695658	True
Bos_taurus	tRNA-Arg-CCG-2-1	chr19	49585335	49585408	+	10	-29	64.9	1.63639726	12	0.04915912	0.90956341	0.27885	0	36	active	0.959892606	True
Bos_taurus	tRNA-Arg-CCG-3-1	chr16	44063104	44063177	-	10	-25.9	67.1	0.008780822	271	0.01164295	0.180041152	-0.08355	0	57	inactive	-0.895973885	True
Bos_taurus	tRNA-Arg-CCG-4-1	chr7	21000388	21000461	-	10	-19.7	62	-0.046150685	93	0.016817594	0.320094068	0.0212	0	96	inactive	-0.85572726	True
Bos_taurus	tRNA-Arg-CCG-5-1	chr10	8214714	8214787	-	10	-22.5	54.3	0.036287671	82	0.010349288	0.131752306	0.10575	0	14	inactive	-0.890831073	True
Bos_taurus	tRNA-Arg-CCG-6-1	chr8	100369864	100369937	+	10	-20.1	58.8	-0.061972603	351	0.016817594	0.157232704	-0.09525	0	39	inactive	-0.945272615	True
Bos_taurus	tRNA-Arg-CCG-7-1	chr10	15110647	15110720	-	10	-14.8	53.1	0.058164384	351	0.03622251	0.470565639	-0.4053	0	34	inactive	-0.646621881	True
Bos_taurus	tRNA-Arg-CCT-1-1	chr19	57033964	57034037	-	36	-32.1	72.3	1.266178082	7	0.071151358	0.990566038	-3.1754	3	71	active	0.9321763	True
Bos_taurus	tRNA-Arg-CCT-1-2	chr25	2633689	2633762	+	36	-32.1	72.3	0.784013699	41	0.040103493	0.834445928	-2.0895	8	45	active	0.841226075	True
Bos_taurus	tRNA-Arg-CCT-10-1	chr26	22733762	22733835	+	36	-17.4	60.4	-0.170521127	168	0.003880983	0.075839653	-0.345833333	0	47	inactive	-0.914552562	True
Bos_taurus	tRNA-Arg-CCT-11-1	chr12	11203569	11203641	-	36	-17.4	61.8	0.045666667	126	0.012953368	0.317460317	-0.5319	0	26	inactive	-0.918842044	True
Bos_taurus	tRNA-Arg-CCT-12-1	chr7	6463047	6463120	-	36	-25.4	68.6	?	53	0.002587322	0	-0.8956	0	53	inactive	-0.922970255	True
Bos_taurus	tRNA-Arg-CCT-13-1	chr28	8457047	8457120	-	36	-22.3	61.2	0.008589041	86	0.014230272	0.364800476	-0.3166	0	48	inactive	-0.874430594	True
Bos_taurus	tRNA-Arg-CCT-14-1	chr15	63633462	63633535	+	36	-15.8	60.2	0.079726027	99	0.003880983	0.053639847	0.1341	0	11	inactive	-0.933583282	True
Bos_taurus	tRNA-Arg-CCT-15-1	chr12	53100148	53100221	-	36	-14.4	66.2	-0.044191781	93	0.005174644	0.151909722	0.12275	0	34	inactive	-0.951082151	True
Bos_taurus	tRNA-Arg-CCT-16-1	chr15	20399873	20399946	+	36	-23.8	64.5	-0.122136986	70	0.003880983	0.080515298	-0.05445	0	4	inactive	-0.942045736	True
Bos_taurus	tRNA-Arg-CCT-17-1	chr23	14536133	14536206	-	36	-21.8	56.3	0.014178082	351	0.010349288	0.266768293	-0.43595	0	1	inactive	-0.910165955	True
Bos_taurus	tRNA-Arg-CCT-18-1	chr3	106643857	106643930	-	36	-14.3	62.4	0.008493151	49	0.005174644	0.152505447	0.16055	0	24	inactive	-0.941765861	True
Bos_taurus	tRNA-Arg-CCT-19-1	chr19	19570852	19570925	-	36	-16.9	63.9	0.032712329	351	0.031047865	0.406976744	0.07845	0	25	inactive	-0.708773851	True
Bos_taurus	tRNA-Arg-CCT-2-1	chr25	2586870	2586943	+	36	-30.6	71.7	0.914150685	32	0.038809832	0.800304878	-2.7431	3	47	active	0.915049545	True
Bos_taurus	tRNA-Arg-CCT-20-1	chr13	77451427	77451500	+	36	-19.6	57.5	0.005849315	75	0.014230272	0.297113752	-0.11315	0	9	inactive	-0.932086872	True
Bos_taurus	tRNA-Arg-CCT-21-1	chr9	65291101	65291174	-	36	-14.4	51.6	0.052150685	53	0.005174644	0.108560794	0.1071	0	2	inactive	-0.873538079	True
Bos_taurus	tRNA-Arg-CCT-22-1	chr17	17169898	17169971	+	36	-18	56	0.053369863	109	0.006468305	0.302768166	0.1233	0	6	inactive	-0.917510515	True
Bos_taurus	tRNA-Arg-CCT-23-1	chr1	118331058	118331131	+	36	-22	62.2	-0.016287671	106	0.009055627	0.239071038	0.05105	0	14	inactive	-0.946939852	True
Bos_taurus	tRNA-Arg-CCT-24-1	chr2	60255895	60255968	-	36	-13.3	59.5	0.057931507	266	0.002587322	0	-0.13315	0	5	inactive	-0.925311287	True
Bos_taurus	tRNA-Arg-CCT-25-1	chr12	16293538	16293611	-	36	-14	58.4	-0.146808219	65	0.014230272	0.409896062	0.0709	0	25	inactive	-0.864589486	True
Bos_taurus	tRNA-Arg-CCT-26-1	chr7	39893645	39893718	-	36	-16.7	60.5	0.098520548	136	0.002587322	0	-0.16635	0	34	inactive	-0.92740491	True
Bos_taurus	tRNA-Arg-CCT-27-1	chr17	56134269	56134342	+	36	-24.1	60.5	-0.062808219	154	0.009055627	0.348466746	-0.10115	0	50	inactive	-0.90376065	True
Bos_taurus	tRNA-Arg-CCT-28-1	chr14	32943613	32943686	-	36	-18.3	52.8	0.057945205	320	0.002587322	0	-0.06265	0	7	inactive	-0.929947129	True
Bos_taurus	tRNA-Arg-CCT-29-1	chr3	119209682	119209755	-	36	-21.6	54.8	-0.044739726	351	0.015523933	0.15597148	-0.3194	0	5	inactive	-0.957113222	True
Bos_taurus	tRNA-Arg-CCT-3-1	chr19	57032531	57032604	-	36	-30.2	67.5	1.022753425	60	0.067270375	0.993589744	-0.38895	3	73	active	0.872787767	True
Bos_taurus	tRNA-Arg-CCT-30-1	chr10	78471976	78472049	+	36	-19.4	59.2	0.049821918	351	0.003880983	0	-0.04485	0	0	inactive	-0.933127987	True
Bos_taurus	tRNA-Arg-CCT-32-1	chr5	93829240	93829313	+	36	-18.1	54.3	0.056219178	51	0.002587322	0.131975867	0.04255	0	3	inactive	-0.918683977	True
Bos_taurus	tRNA-Arg-CCT-33-1	chr21	15354373	15354446	+	36	-23.3	51.8	0.080205479	351	0.015523933	0.266819135	-0.0669	0	1	inactive	-0.827113133	True
Bos_taurus	tRNA-Arg-CCT-34-1	chr13	72667772	72667845	+	36	-16.5	52.7	0.02139726	95	0.007761966	0.181936322	0.04225	0	0	inactive	-0.92790207	True
Bos_taurus	tRNA-Arg-CCT-4-1	chr4	103714739	103714812	+	36	-27.2	65.6	1.635150685	6	0.056921087	1.329656863	-1.3542	0	30	active	0.924732065	True
Bos_taurus	tRNA-Arg-CCT-5-1	chr19	57033477	57033551	+	36	-32.6	64.2	0.793581081	35	0.096899225	1.207843137	-3.004	3	72	active	0.911084014	True
Bos_taurus	tRNA-Arg-CCT-6-1	chr25	2612168	2612241	-	36	-33.6	73.6	0.390972603	10	0.027166882	0.472207232	-0.7721	12	44	active	0.754588065	True
Bos_taurus	tRNA-Arg-CCT-7-1	chr5	73645956	73646029	-	36	-25	60.1	0.014150685	33	0.007761966	0.125	-0.0384	0	1	inactive	-0.932183904	True
Bos_taurus	tRNA-Arg-CCT-8-1	chr13	75985781	75985854	+	36	-25.2	67	-0.02090411	351	0.015523933	0.192138779	-0.38425	0	27	inactive	-0.963527973	True
Bos_taurus	tRNA-Arg-CCT-9-1	chr25	18985180	18985253	+	36	-11	66.8	0	162	0.005174644	0.113049096	0	0	17	inactive	-0.92972874	True
Bos_taurus	tRNA-Arg-TCG-1-1	chr21	21215852	21215925	+	9	-29.2	74.8	1.552972603	16	0.054333765	0.71697804	-3.21675	0	72	active	0.98763923	True
Bos_taurus	tRNA-Arg-TCG-2-1	chr25	26877427	26877500	+	9	-24	71.1	0.057589041	14	0.015523933	0.214285714	-0.23135	2	60	inactive	-0.857890132	True
Bos_taurus	tRNA-Arg-TCG-3-1	chr25	26872201	26872274	+	9	-23.2	70.4	0.123465753	14	0.016817594	0.162337662	-0.11035	2	67	inactive	-0.74758138	True
Bos_taurus	tRNA-Arg-TCG-4-1	chr1	95118150	95118223	+	9	-23.7	65.5	1.051931507	8	0.029754204	0.291747708	-2.6725	2	14	active	0.906521159	True
Bos_taurus	tRNA-Arg-TCG-4-2	chr23	31441479	31441552	-	9	-23.7	65.5	0.73369863	38	0.032341527	0.664893617	-3.07255	11	43	active	0.912393118	True
Bos_taurus	tRNA-Arg-TCG-5-1	chr19	57033078	57033151	+	9	-25.9	66.4	0.008452055	6	0.10996119	0.987743912	-1.6955	3	72	active	0.922284083	True
Bos_taurus	tRNA-Arg-TCG-6-1	chr20	7388078	7388151	-	9	-23.3	64.5	0.213054795	6	0.01164295	0.038080731	-0.7473	0	1	inactive	-0.828731718	True
Bos_taurus	tRNA-Arg-TCG-7-1	chr25	26871492	26871565	+	9	-21.7	60.6	0.065561644	16	0.018111255	0.187115744	-0.49065	2	69	inactive	-0.676072185	True
Bos_taurus	tRNA-Arg-TCG-8-1	chr23	31454510	31454583	-	9	-23.7	64.3	1.108917808	1	0.025873221	0.600686499	-5.4912	7	40	active	0.985793435	True
Bos_taurus	tRNA-Arg-TCT-1-1	chr23	30875297	30875385	-	11	-28.9	70.7	0.330876712	6	0.025380711	0.627240143	-2.7793	3	3	active	0.975987636	True
Bos_taurus	tRNA-Arg-TCT-10-1	chr12	20693025	20693098	+	11	-25.5	55.7	0.008342466	184	0.010349288	0.206855792	-0.22385	0	7	inactive	-0.900045523	True
Bos_taurus	tRNA-Arg-TCT-2-1	chr11	98957688	98957779	-	11	-27.9	70.1	0.263726027	2	0.069532238	0.981449525	-2.40395	0	86	active	0.985771174	True
Bos_taurus	tRNA-Arg-TCT-2-2	chr15	84095759	84095845	+	11	-28.4	70.3	1.177753425	6	0.066157761	0.913043478	-2.6272	5	30	active	0.988209066	True
Bos_taurus	tRNA-Arg-TCT-3-1	chr3	49796402	49796487	-	11	-30.7	71.1	1.577890411	4	0.078980892	0.971451229	0.73965	0	19	active	0.959366774	True
Bos_taurus	tRNA-Arg-TCT-4-1	chr19	28374365	28374452	+	11	-25.6	70.8	1.488931507	1	0.053367217	0.896636222	-0.3449	4	103	active	0.959848618	True
Bos_taurus	tRNA-Arg-TCT-5-1	chr3	10711896	10711970	+	11	-27.7	78.5	1.588297297	19	0.023255814	0.274725275	1.4798	0	19	active	0.786138032	True
Bos_taurus	tRNA-Arg-TCT-6-1	chr16	442113	442186	+	11	-30.6	70.9	-0.126246575	351	0.005174644	0.102011075	-0.87725	0	11	inactive	-0.779356509	True
Bos_taurus	tRNA-Arg-TCT-7-1	chr1	85737929	85738002	+	11	-20.5	62.8	0.00209589	99	0.005174644	0.190943808	-0.26575	0	2	inactive	-0.884125765	True
Bos_taurus	tRNA-Arg-TCT-8-1	chr5	112940693	112940766	-	11	-24.2	53.4	0.013972603	351	0.027166882	0.469618555	-0.20995	0	72	inactive	-0.641636472	True
Bos_taurus	tRNA-Arg-TCT-9-1	chr2	26828983	26829055	-	11	-15.7	57.6	0.012944444	265	0.011658031	0.364583333	0.10995	0	33	inactive	-0.903123104	True
Bos_taurus	tRNA-Asn-GTT-1-1	chr3	20918280	20918354	-	28	-26.4	80.9	0.439067568	9	0.049095607	0.772495756	-1.63365	2	29	active	0.933514232	True
Bos_taurus	tRNA-Asn-GTT-1-10	chr3	21326887	21326961	+	28	-26.4	80.9	0.124	33	0.072351421	1.046728972	-0.77095	5	0	active	0.881867248	True
Bos_taurus	tRNA-Asn-GTT-1-11	chr3	21402997	21403071	-	28	-26.4	80.9	0.023162162	5	0.045219638	0.799847648	-1.07625	3	4	active	0.85805838	True
Bos_taurus	tRNA-Asn-GTT-1-12	chr3	21445613	21445687	-	28	-26.4	80.9	-0.016486486	11	0.072351421	0.550416281	-0.16415	5	25	active	0.720090275	True
Bos_taurus	tRNA-Asn-GTT-1-13	chr7	45426983	45427057	+	28	-26.4	80.9	0.941418919	10	0.096899225	0.98536036	-2.11435	1	77	active	0.939243231	True
Bos_taurus	tRNA-Asn-GTT-1-14	chr12	30199503	30199577	+	28	-26.4	80.9	1.250459459	6	0.099483204	0.942028986	-2.01175	0	15	active	0.935839625	True
Bos_taurus	tRNA-Asn-GTT-1-15	chr19	39979527	39979601	-	28	-26.4	80.9	1.587486486	5	0.046511628	0.640830027	-1.922	0	59	active	0.972877775	True
Bos_taurus	tRNA-Asn-GTT-1-2	chr3	20951392	20951466	+	28	-26.4	80.9	0.455648649	15	0.065891473	0.852272727	-1.9429	3	20	active	0.933806566	True
Bos_taurus	tRNA-Asn-GTT-1-3	chr3	21003851	21003925	+	28	-26.4	80.9	0.123986486	12	0.073643411	0.782845473	-0.3264	3	10	active	0.847152196	True
Bos_taurus	tRNA-Asn-GTT-1-5	chr3	21094077	21094151	+	28	-26.4	80.9	0.102283784	33	0.071059432	1.055521188	-0.58105	2	3	active	0.83032381	True
Bos_taurus	tRNA-Asn-GTT-1-6	chr3	21176821	21176895	+	28	-26.4	80.9	-0.022581081	11	0.07751938	0.660938533	-0.4293	4	8	active	0.71850672	True
Bos_taurus	tRNA-Asn-GTT-1-7	chr3	21208569	21208643	+	28	-26.4	80.9	-0.092986486	12	0.080103359	0.762250454	-0.14435	4	5	active	0.719414308	True
Bos_taurus	tRNA-Asn-GTT-1-8	chr3	21227257	21227331	-	28	-26.4	80.9	0.12422973	12	0.069767442	0.538668719	-0.3278	5	5	active	0.826823139	True
Bos_taurus	tRNA-Asn-GTT-10-1	chr3	22836907	22836981	+	28	-23.4	73.6	0.010013514	36	0.034883721	0.642033543	-0.5754	1	16	active	0.672807203	True
Bos_taurus	tRNA-Asn-GTT-11-1	chr23	31274844	31274918	-	28	-24.4	60.8	-0.082418919	186	0.023255814	0.690140845	-0.0376	0	26	inactive	-0.532512519	True
Bos_taurus	tRNA-Asn-GTT-2-1	chr3	21350555	21350629	-	28	-26.4	79.9	0.124216216	13	0.062015504	0.865979381	-0.7902	1	0	active	0.884370637	True
Bos_taurus	tRNA-Asn-GTT-2-2	chr3	22854455	22854529	-	28	-26.4	79.9	-0.054472973	37	0.056847545	0.883838384	-0.7346	1	16	active	0.77487409	True
Bos_taurus	tRNA-Asn-GTT-3-1	chr3	21442888	21442962	-	28	-25.9	77.1	-1.018635135	11	0.0374677	0.44397463	-1.182105263	5	21	active	0.805133147	True
Bos_taurus	tRNA-Asn-GTT-4-1	chr13	23624296	23624370	-	28	-26.1	78.8	1.421959459	8	0.067183463	0.714285714	-3.32375	0	1	active	0.92111118	True
Bos_taurus	tRNA-Asn-GTT-5-1	chr3	20944126	20944200	-	28	-26.4	75.2	0.468391892	13	0.059431525	0.720411664	-1.59745	4	22	active	0.920179048	True
Bos_taurus	tRNA-Asn-GTT-6-1	chr3	21139056	21139130	-	28	-24.5	73.5	0.031486486	10	0.047803618	0.780780781	-0.71485	3	8	active	0.78915114	True
Bos_taurus	tRNA-Asn-GTT-7-1	chr3	21378531	21378605	-	28	-26.4	80.9	0.080689189	10	0.049095607	0.745188213	-0.492470588	3	0	active	0.83217463	True
Bos_taurus	tRNA-Asn-GTT-8-1	chr3	21147446	21147520	-	28	-21.9	72.2	-0.005864865	11	0.055555556	0.510204082	-0.26855	2	8	active	0.665795897	True
Bos_taurus	tRNA-Asn-GTT-9-1	chr3	8007512	8007586	-	28	-26.8	81.6	1.135202703	11	0.043927649	0.74484767	-4.35305	0	20	active	0.943377635	True
Bos_taurus	tRNA-Asp-ATC-1-1	chr3	110433756	110433829	+	2	-19.5	56.5	-0.229465753	131	0.009055627	0.273794003	0.0563	0	31	inactive	-0.900827473	True
Bos_taurus	tRNA-Asp-ATC-2-1	chr17	48732557	48732630	-	2	-24	53	-0.035986301	165	0.014230272	0.324074074	-0.0613	0	0	inactive	-0.881274975	True
Bos_taurus	tRNA-Asp-GTC-1-1	chr5	63016479	63016551	+	21	-26.4	65.4	1.082666667	11	0.038860104	0.342130987	-4.18125	0	21	active	0.879158635	True
Bos_taurus	tRNA-Asp-GTC-10-1	chr25	20392007	20392081	-	21	-20.9	61.2	-0.106567568	160	0.006459948	0.174825175	-0.29505	0	38	inactive	-0.949088596	True
Bos_taurus	tRNA-Asp-GTC-11-1	chr7	15748125	15748198	-	21	-17.5	58	0.030369863	179	0.003880983	0	0.10025	0	83	inactive	-0.937992434	True
Bos_taurus	tRNA-Asp-GTC-12-1	chr17	56417645	56417718	+	21	-19.7	56.6	0.101794521	351	0.007761966	0.135606354	-0.05785	0	19	inactive	-0.920864748	True
Bos_taurus	tRNA-Asp-GTC-13-1	chrX	141749485	141749557	+	21	-15.4	55.9	-0.010861111	351	0.002590674	0	0.0328	0	0	inactive	-0.926794231	True
Bos_taurus	tRNA-Asp-GTC-2-1	chr3	8019954	8020026	-	21	-26.4	66.5	0.640638889	9	0.031088083	0.649350649	-3.46025	2	15	active	0.986501089	True
Bos_taurus	tRNA-Asp-GTC-2-2	chr3	8111824	8111896	-	21	-26.4	66.5	?	11	0.101036269	0.806705081	?	7	5	active	0.963785188	True
Bos_taurus	tRNA-Asp-GTC-2-3	chr3	8114683	8114755	+	21	-26.4	66.5	-0.108236111	11	0.120466321	0.890066225	-0.3738	5	4	active	0.720905758	True
Bos_taurus	tRNA-Asp-GTC-2-4	chr5	60678960	60679032	+	21	-26.4	66.5	1.594763889	12	0.028497409	0.60483871	-2.8928	0	45	active	0.986708608	True
Bos_taurus	tRNA-Asp-GTC-2-5	chr17	53128219	53128291	+	21	-26.4	66.5	0.731194444	12	0.041450777	0.734329924	-2.6871	4	35	active	0.98763689	True
Bos_taurus	tRNA-Asp-GTC-2-6	chr17	53131190	53131262	+	21	-26.4	66.5	1.515527778	8	0.04015544	0.896286812	-4.76195	4	35	active	0.988662871	True
Bos_taurus	tRNA-Asp-GTC-2-7	chr19	28460394	28460466	-	21	-26.4	66.5	1.402319444	14	0.033678756	0.577045022	-4.8169	6	117	active	0.988759297	True
Bos_taurus	tRNA-Asp-GTC-2-8	chr23	30858998	30859070	+	21	-26.4	66.5	-0.287888889	14	0.028497409	0.482625483	-1.3192	5	7	active	0.882147765	True
Bos_taurus	tRNA-Asp-GTC-2-9	chr23	30940463	30940535	-	21	-26.4	66.5	0.244513889	12	0.047927461	0.750428816	-1.84275	4	14	active	0.981348985	True
Bos_taurus	tRNA-Asp-GTC-3-1	chr3	8095654	8095726	-	21	-26.4	66.5	?	11	0.115284974	1.071695295	?	4	10	active	0.951962015	True
Bos_taurus	tRNA-Asp-GTC-4-1	chr3	77509029	77509101	-	21	-19.8	55.5	0.074430556	11	0.016839378	0.209080048	0.0026	0	20	inactive	-0.866633395	True
Bos_taurus	tRNA-Asp-GTC-5-1	chr3	3317636	3317708	-	21	-18.7	50.4	?	351	0.022020725	0.459016393	-0.27075	0	19	inactive	-0.580660653	True
Bos_taurus	tRNA-Asp-GTC-6-1	chr9	62555410	62555482	-	21	-17.4	51.6	-0.017305556	255	0.011658031	0	-0.45875	0	0	inactive	-0.895902301	True
Bos_taurus	tRNA-Asp-GTC-7-1	chr10	17931837	17931909	+	21	-20.2	53.1	0	11	0.03626943	0.517314189	-0.53945	0	3	inactive	-0.524956959	True
Bos_taurus	tRNA-Asp-GTC-8-1	chr18	36741316	36741388	-	21	-17.7	52.8	0.029180556	11	0.010362694	0.14957265	0.2655	0	10	inactive	-0.898201295	True
Bos_taurus	tRNA-Asp-GTC-9-1	chr19	46561736	46561809	-	21	-18.4	55	0	85	0.007761966	0.707070707	-0.0149	0	10	inactive	-0.681851863	True
Bos_taurus	tRNA-Cys-ACA-1-1	chr1	87887468	87887540	+	1	-16.6	61.5	0	256	0.012953368	0.305944056	0.02365	0	16	inactive	-0.890498382	True
Bos_taurus	tRNA-Cys-GCA-1-1	chr19	40088101	40088173	+	39	-26.1	81.9	1.335375	7	0.009067358	0.086419753	-3.45375	2	31	inactive	-0.666294884	True
Bos_taurus	tRNA-Cys-GCA-1-2	chr19	40295072	40295144	-	39	-26.1	81.9	1.550694444	8	0.024611399	0.571661903	-2.21285	1	46	active	0.932178784	True
Bos_taurus	tRNA-Cys-GCA-1-3	chr19	40295806	40295878	-	39	-26.1	81.9	1.541083333	15	0.03238342	0.307017544	-4.1524	1	46	active	0.760099038	True
Bos_taurus	tRNA-Cys-GCA-10-1	chr4	113355172	113355244	-	39	-22	73.1	0.489888889	177	0.029792746	0.462147887	-1.42925	2	34	active	0.789019707	True
Bos_taurus	tRNA-Cys-GCA-11-1	chr4	113326403	113326475	+	39	-26.1	73.2	0.085388889	12	0.011658031	0.19509476	0.04245	2	35	inactive	-0.931949035	True
Bos_taurus	tRNA-Cys-GCA-12-1	chr3	22835027	22835099	-	39	-23.9	73.1	0.057083333	12	0.007772021	0	-0.19735	1	16	inactive	-0.923228755	True
Bos_taurus	tRNA-Cys-GCA-13-1	chr4	113198312	113198384	-	39	-19.9	74.4	0.127708333	12	0.007772021	0.236406619	-2.3896	3	17	inactive	-0.839728155	True
Bos_taurus	tRNA-Cys-GCA-14-1	chr28	5903031	5903103	+	39	-12.9	61.7	-0.038166667	351	0.010362694	0.189155107	-0.19595	0	15	inactive	-0.948325479	True
Bos_taurus	tRNA-Cys-GCA-15-1	chr26	39899326	39899416	-	39	-28.9	58.7	-0.030164384	351	0.032911392	0.434782609	-0.3559	0	14	inactive	-0.521622814	True
Bos_taurus	tRNA-Cys-GCA-16-1	chr12	58854640	58854712	-	39	-20.3	67	-0.060387755	268	0.00388601	0.065888554	-0.38995	0	6	inactive	-0.946484957	True
Bos_taurus	tRNA-Cys-GCA-17-1	chr27	11144061	11144133	-	39	-19.6	64.3	0.079402778	330	0.009067358	0.2843987	-0.5129	0	2	inactive	-0.887724816	True
Bos_taurus	tRNA-Cys-GCA-18-1	chr15	60104706	60104778	-	39	-19.5	63.5	-0.4959	351	0.010362694	0.193441415	-0.2205	0	0	inactive	-0.911679264	True
Bos_taurus	tRNA-Cys-GCA-19-1	chr6	19772348	19772420	-	39	-20	64.8	?	236	0.006476684	0.212121212	0.235333333	0	0	inactive	-0.931070927	True
Bos_taurus	tRNA-Cys-GCA-19-2	chr15	67680281	67680353	+	39	-20	64.8	-0.264736111	167	0.005181347	0.107526882	0.02525	0	14	inactive	-0.931669127	True
Bos_taurus	tRNA-Cys-GCA-2-1	chr4	113190346	113190418	+	39	-24.6	81.8	0.445638889	9	0.011658031	0.175649905	-1.48225	3	17	inactive	-0.762760519	True
Bos_taurus	tRNA-Cys-GCA-20-1	chr3	57517818	57517890	-	39	-22.6	62.9	0.007805556	126	0.010362694	0.126995646	0.12225	0	31	inactive	-0.944212	True
Bos_taurus	tRNA-Cys-GCA-21-1	chr7	90257233	90257305	+	39	-20	61.1	0	134	0.00388601	0	0.0493	0	6	inactive	-0.942863101	True
Bos_taurus	tRNA-Cys-GCA-22-1	chr5	43274867	43274939	-	39	-18.3	63.1	?	232	0.009067358	0.073560319	-0.538266667	0	25	inactive	-0.942160831	True
Bos_taurus	tRNA-Cys-GCA-23-1	chr8	102052246	102052318	-	39	-14.9	61.4	0.073555556	146	0.012953368	0.118323191	-0.00925	0	4	inactive	-0.912992416	True
Bos_taurus	tRNA-Cys-GCA-24-1	chr18	35714949	35715021	-	39	-20.9	62.7	-0.006708333	303	0.006476684	0	-0.1775	0	48	inactive	-0.947418951	True
Bos_taurus	tRNA-Cys-GCA-25-1	chr4	75538949	75539041	-	39	-19.7	57.4	0.002493151	351	0.01010101	0.150948821	-0.5629	0	23	inactive	-0.969562139	True
Bos_taurus	tRNA-Cys-GCA-3-1	chr19	40090179	40090251	-	39	-23.9	81.8	1.528555556	6	0.049222798	0.854202037	-1.7664	2	33	active	0.970876885	True
Bos_taurus	tRNA-Cys-GCA-4-1	chr4	113224087	113224159	-	39	-26.1	77.3	0.355041667	12	0.027202073	0.471014493	-2.20445	1	13	active	0.846325718	True
Bos_taurus	tRNA-Cys-GCA-4-2	chr4	113360059	113360131	-	39	-26.1	77.3	0.407527778	5	0.014248705	0.407925408	-1.6678	2	37	inactive	-0.591564416	True
Bos_taurus	tRNA-Cys-GCA-4-3	chr12	30312708	30312780	+	39	-26.1	77.3	-0.052180556	11	0.011658031	0.070993915	-0.65425	0	8	inactive	-0.941801191	True
Bos_taurus	tRNA-Cys-GCA-4-4	chr19	40067568	40067640	-	39	-26.1	77.3	0.968291667	13	0.007772021	0.113636364	-3.1038	0	34	inactive	-0.845675269	True
Bos_taurus	tRNA-Cys-GCA-4-5	chr19	40084728	40084800	-	39	-26.1	77.3	0.911277778	11	0.015544041	0.35443038	-1.3886	2	33	inactive	-0.771460934	True
Bos_taurus	tRNA-Cys-GCA-5-1	chr4	113191646	113191718	+	39	-24.6	77.2	0.305361111	12	0.007772021	0.177642431	-0.97905	3	16	inactive	-0.92628689	True
Bos_taurus	tRNA-Cys-GCA-5-2	chr4	113211856	113211928	-	39	-24.6	77.2	0.393569444	14	0.007772021	0.104321908	-2.1896	1	13	inactive	-0.888125611	True
Bos_taurus	tRNA-Cys-GCA-5-3	chr4	113324139	113324211	+	39	-24.6	77.2	0.467861111	13	0.012953368	0.295807978	-1.4559	2	35	inactive	-0.836781394	True
Bos_taurus	tRNA-Cys-GCA-5-4	chr4	113327790	113327862	+	39	-24.6	77.2	0.024759259	11	0.009067358	0.053313024	-1.297733333	3	35	inactive	-0.912363555	True
Bos_taurus	tRNA-Cys-GCA-5-5	chr4	113340795	113340867	+	39	-24.6	77.2	0.302041667	2	0.016839378	0.140449438	-1.7279	1	32	inactive	-0.728508677	True
Bos_taurus	tRNA-Cys-GCA-5-6	chr4	113363848	113363920	+	39	-24.6	77.2	0.478763889	13	0.006476684	0.139516343	-0.78335	2	42	inactive	-0.938388121	True
Bos_taurus	tRNA-Cys-GCA-5-7	chr4	113542909	113542981	-	39	-24.6	77.2	0.463333333	12	0.002590674	0	-0.87255	1	79	inactive	-0.921668052	True
Bos_taurus	tRNA-Cys-GCA-6-1	chr4	113217940	113218012	-	39	-23.9	77.1	0.095763889	351	0.005181347	0.081967213	-1.83515	2	10	inactive	-0.907748199	True
Bos_taurus	tRNA-Cys-GCA-7-1	chr4	113196638	113196710	-	39	-24.6	74	0.701569444	4	0.012953368	0.267584098	-1.4865	3	17	inactive	-0.73053249	True
Bos_taurus	tRNA-Cys-GCA-7-2	chr4	113336673	113336745	+	39	-24.6	74	0.732555556	13	0.005181347	0.126506024	-1.07625	2	32	inactive	-0.89259685	True
Bos_taurus	tRNA-Cys-GCA-8-1	chr4	113178959	113179031	+	39	-23.9	81.1	0.453763889	2	0.010362694	0.057765308	-1.14965	0	16	inactive	-0.786654784	True
Bos_taurus	tRNA-Cys-GCA-9-1	chr4	113546427	113546499	+	39	-25.8	74.8	0.457444444	5	0.015544041	0.45617465	-1.761	1	74	active	0.518492313	True
Bos_taurus	tRNA-Gln-CTG-1-1	chr10	12690609	12690681	-	24	-24.7	71.5	1.533805556	13	0.042746114	0.740740741	-2.6037	0	25	active	0.987567083	True
Bos_taurus	tRNA-Gln-CTG-1-2	chr19	28373265	28373337	+	24	-24.7	71.5	1.355236111	5	0.022020725	0.867768595	-4.7383	4	102	active	0.978580891	True
Bos_taurus	tRNA-Gln-CTG-1-3	chr23	29896883	29896955	+	24	-24.7	71.5	1.120013889	15	0.025906736	0.116086235	-3.5998	4	25	active	0.808487861	True
Bos_taurus	tRNA-Gln-CTG-1-4	chr23	30930716	30930788	-	24	-24.7	71.5	0.543152778	6	0.033678756	0.901253918	-1.40515	7	14	active	0.982371557	True
Bos_taurus	tRNA-Gln-CTG-10-1	chr3	21175561	21175633	-	24	-19.3	56.2	-0.444	25	0.045336788	0.351607348	-0.98155	4	8	inactive	-0.558084771	True
Bos_taurus	tRNA-Gln-CTG-11-1	chr23	47095690	47095762	+	24	-19.9	55.9	0	351	0.03238342	0.544708546	-0.0922	0	7	inactive	-0.622576589	True
Bos_taurus	tRNA-Gln-CTG-12-1	chr26	7313029	7313101	-	24	-13.3	51.9	0.030791667	219	0.006476684	0.138339921	-0.1295	0	1	inactive	-0.895097097	True
Bos_taurus	tRNA-Gln-CTG-13-1	chr12	19568840	19568915	-	24	-16.7	52	0	52	0.00516129	0	-0.0505	0	28	inactive	-0.911643268	True
Bos_taurus	tRNA-Gln-CTG-14-1	chr12	62251426	62251498	+	24	-16.9	55.6	0.077041667	232	0.00388601	0.071560008	-0.71075	0	0	inactive	-0.898847502	True
Bos_taurus	tRNA-Gln-CTG-15-1	chr7	3186226	3186299	+	24	-18.6	54.8	0.057917808	241	0.007761966	0.190631808	0.0423	0	9	inactive	-0.93944192	True
Bos_taurus	tRNA-Gln-CTG-16-1	chr5	39604130	39604203	-	24	-20.5	54.2	0.054684932	144	0.010349288	0.260416667	-0.1894	0	1	inactive	-0.872330908	True
Bos_taurus	tRNA-Gln-CTG-2-1	chr23	30884666	30884738	+	24	-24.2	70.5	0.9255	7	0.015544041	0.556586271	-2.33465	5	2	active	0.699678026	True
Bos_taurus	tRNA-Gln-CTG-3-1	chr3	22852278	22852350	+	24	-24.2	72.1	-0.510222222	25	0.073834197	0.781738587	-0.8044	1	19	active	0.868189757	True
Bos_taurus	tRNA-Gln-CTG-4-1	chr3	21027596	21027668	-	24	-24.2	71.1	-0.476013889	25	0.050518135	0.571817563	-0.6896	4	10	active	0.811560052	True
Bos_taurus	tRNA-Gln-CTG-4-2	chr3	21203592	21203664	-	24	-24.2	71.1	-0.430930556	25	0.054404145	0.392621214	-1.05955	4	5	active	0.714181378	True
Bos_taurus	tRNA-Gln-CTG-4-3	chr3	21228517	21228589	+	24	-24.2	71.1	-0.378569444	25	0.047927461	0.693435477	-0.97025	5	5	active	0.89515574	True
Bos_taurus	tRNA-Gln-CTG-4-4	chr3	21319779	21319851	+	24	-24.2	71.1	-0.433513889	25	0.051813472	0.657012604	-0.77635	7	0	active	0.847418632	True
Bos_taurus	tRNA-Gln-CTG-5-1	chr3	20999411	20999483	-	24	-24.4	73.1	-0.429	19	0.034974093	0.249287749	-0.7393	3	10	active	0.600976447	True
Bos_taurus	tRNA-Gln-CTG-6-1	chr23	30778161	30778233	+	24	-22	66.9	0.498138889	12	0.014248705	0.328207052	-3.2451	4	32	inactive	-0.627138478	True
Bos_taurus	tRNA-Gln-CTG-7-1	chr4	100661361	100661433	+	24	-19.7	57.7	0.101097222	6	0.00388601	0.115740741	-0.75305	0	4	inactive	-0.855489588	True
Bos_taurus	tRNA-Gln-CTG-8-1	chr1	111956829	111956901	-	24	-19.7	60.7	0.001527778	7	0.010362694	0.108258583	-0.3677	0	9	inactive	-0.883236006	True
Bos_taurus	tRNA-Gln-CTG-9-1	chr16	25638756	25638828	-	24	-18.8	54.4	0.005611111	351	0.012953368	0.298062593	-0.05955	0	0	inactive	-0.900993303	True
Bos_taurus	tRNA-Gln-TTG-1-1	chr19	38011243	38011315	-	15	-27.1	72.6	1.630513889	9	0.071243523	0.730745438	0.1454	0	29	active	0.961200176	True
Bos_taurus	tRNA-Gln-TTG-10-1	chr7	25616368	25616440	+	15	-21.3	65.3	-0.080194444	125	0.007772021	0.249554367	-0.18905	0	12	inactive	-0.928968336	True
Bos_taurus	tRNA-Gln-TTG-11-1	chr5	98309229	98309302	+	15	-24.9	58.8	0.047821918	106	0.010349288	0.400326797	0.08	0	0	inactive	-0.680325333	True
Bos_taurus	tRNA-Gln-TTG-12-1	chrX	9967171	9967243	+	15	-17.5	52	0.026180556	93	0	0	0.02155	0	0	inactive	-0.891610956	True
Bos_taurus	tRNA-Gln-TTG-13-1	chr7	17111722	17111796	+	15	-16.4	54.3	0.102	151	0.015503876	0	-0.10085	0	63	inactive	-0.917043604	True
Bos_taurus	tRNA-Gln-TTG-2-1	chr19	50740338	50740410	+	15	-22.7	70.8	-0.112513889	1	0.019430052	0.274509804	-0.64375	1	53	inactive	-0.629629738	True
Bos_taurus	tRNA-Gln-TTG-3-1	chr23	30058291	30058363	-	15	-27.1	70	0.426333333	12	0.049222798	0.704508857	-1.43915	3	12	active	0.982528875	True
Bos_taurus	tRNA-Gln-TTG-4-1	chr23	30774251	30774323	+	15	-22	66.9	0.985263889	22	0.024611399	0.063199711	-2.86425	2	32	active	0.792682255	True
Bos_taurus	tRNA-Gln-TTG-4-2	chr23	31448985	31449057	+	15	-22	66.9	0.719111111	3	0.028497409	0.677419355	-2.48625	9	40	active	0.916877578	True
Bos_taurus	tRNA-Gln-TTG-4-3	chr23	31449548	31449620	+	15	-22	66.9	-0.02875	7	0.019430052	0.435865504	-0.853	9	39	active	0.609314938	True
Bos_taurus	tRNA-Gln-TTG-5-1	chr3	22684168	22684240	-	15	-22	54.6	-0.620771429	18	0.037564767	0.786516854	-1.129611111	0	21	active	0.664741194	True
Bos_taurus	tRNA-Gln-TTG-6-1	chr10	72631614	72631686	-	15	-16.4	53.8	0.086708333	138	0.010362694	0.243055556	0.02275	0	18	inactive	-0.882387728	True
Bos_taurus	tRNA-Gln-TTG-7-1	chr17	73470870	73470943	-	15	-22.2	55.9	0.12428125	351	0.010349288	0.098563785	-0.01555	0	83	inactive	-0.914365586	True
Bos_taurus	tRNA-Gln-TTG-8-1	chr25	34046694	34046774	-	15	-24.1	58.4	0.014486111	52	0.01025641	0.231481481	-0.2086	0	50	inactive	-0.918133043	True
Bos_taurus	tRNA-Gln-TTG-9-1	chr19	18149076	18149148	-	15	-16.4	55.1	-0.035722222	53	0.015544041	0.314295977	0.1693	0	34	inactive	-0.931061086	True
Bos_taurus	tRNA-Glu-CTC-1-1	chr3	8110641	8110713	-	8	-26.4	73.2	?	78	0.080310881	0.87258271	?	7	6	active	0.954059357	True
Bos_taurus	tRNA-Glu-CTC-1-2	chr3	21457742	21457814	-	8	-26.4	73.2	1.228736111	7	0.025906736	0.681596884	-3.93305	2	26	active	0.988202191	True
Bos_taurus	tRNA-Glu-CTC-1-3	chr7	44000402	44000474	+	8	-26.4	73.2	0.962652778	5	0.050518135	0.882782424	-2.6955	1	35	active	0.986846887	True
Bos_taurus	tRNA-Glu-CTC-1-4	chr23	29874145	29874217	-	8	-26.4	73.2	0.858319444	11	0.033678756	0.593507752	-3.1592	2	26	active	0.987930963	True
Bos_taurus	tRNA-Glu-CTC-2-1	chr3	8094448	8094520	-	8	-24.3	72.2	?	61	0.077720207	0.940400586	?	4	10	active	0.95474704	True
Bos_taurus	tRNA-Glu-CTC-3-1	chr2	824303	824376	+	8	-23.9	65.2	0.118616438	351	0.014230272	0.137254902	0.041	0	47	inactive	-0.896083386	True
Bos_taurus	tRNA-Glu-CTC-4-1	chr16	4769146	4769219	+	8	-22.2	72.9	0.025739726	56	0.007761966	0.155279503	-0.05935	0	45	inactive	-0.879708532	True
Bos_taurus	tRNA-Glu-CTC-5-1	chr20	33957035	33957108	-	8	-18.3	68	0.039027397	351	0.005174644	0.222222222	0.1653	0	0	inactive	-0.8855368	True
Bos_taurus	tRNA-Glu-TTC-1-1	chr3	20943568	20943640	-	39	-26.4	73.2	-0.241361111	15	0.047927461	0.934025204	-0.248333333	4	22	active	0.742983805	True
Bos_taurus	tRNA-Glu-TTC-1-2	chr9	25853593	25853665	+	39	-26.4	73.2	1.204361111	7	0.03626943	0.897742818	-3.3417	0	9	active	0.907657999	True
Bos_taurus	tRNA-Glu-TTC-10-1	chr23	18751406	18751479	-	39	-23.5	67.2	0.014383562	133	0.009055627	0	0.123	0	6	inactive	-0.943749181	True
Bos_taurus	tRNA-Glu-TTC-11-1	chr5	75316724	75316796	-	39	-16.2	67.9	-0.046361111	300	0.014248705	0.176767677	0.00925	0	33	inactive	-0.961406957	True
Bos_taurus	tRNA-Glu-TTC-12-1	chr13	78227591	78227664	+	39	-18.4	68.3	0.100123288	351	0.009055627	0.076855512	-0.2286	0	6	inactive	-0.911134028	True
Bos_taurus	tRNA-Glu-TTC-13-1	chr2	126673490	126673562	+	39	-21.7	62.5	-0.001611111	112	0.009067358	0.114541289	0.2651	0	18	inactive	-0.937002988	True
Bos_taurus	tRNA-Glu-TTC-14-1	chr19	23149242	23149315	+	39	-25.5	73.4	0.01930137	351	0.014230272	0.252525253	-0.0384	0	60	inactive	-0.905376041	True
Bos_taurus	tRNA-Glu-TTC-15-1	chr19	43502513	43502586	-	39	-21.1	60.5	0.106082192	351	0.010349288	0.17721519	-0.4314	0	86	inactive	-0.939434538	True
Bos_taurus	tRNA-Glu-TTC-16-1	chr23	17105642	17105715	-	39	-16.8	61.6	0.018506849	272	0.002587322	0	-0.23575	0	89	inactive	-0.932985391	True
Bos_taurus	tRNA-Glu-TTC-17-1	chr18	54747203	54747276	+	39	-21	54.5	0.079753425	43	0.01164295	0.345849802	-0.0378	0	48	inactive	-0.868533059	True
Bos_taurus	tRNA-Glu-TTC-18-1	chr7	44870980	44871053	+	39	-22.7	65.2	-0.081876712	145	0.009055627	0.23828976	-0.2136	0	82	inactive	-0.944687246	True
Bos_taurus	tRNA-Glu-TTC-19-1	chr7	77625995	77626068	-	39	-20.1	67.8	?	351	0.009055627	0.373191165	?	0	0	inactive	-0.858495455	True
Bos_taurus	tRNA-Glu-TTC-2-1	chr3	21066262	21066334	-	39	-26.4	68.7	-0.071930556	66	0.044041451	0.627773058	-0.343210526	4	3	active	0.714387903	True
Bos_taurus	tRNA-Glu-TTC-2-8	chr3	21443948	21444020	-	39	-26.4	68.7	-0.078583333	5	0.04015544	0.589108911	-0.3492	5	21	active	0.710235101	True
Bos_taurus	tRNA-Glu-TTC-20-1	chr14	63873141	63873213	-	39	-23.5	66.8	0.052416667	351	0.006476684	0.164267835	-0.43775	0	6	inactive	-0.957936706	True
Bos_taurus	tRNA-Glu-TTC-21-1	chr22	50696604	50696676	+	39	-21.3	65.1	0.045958333	69	0.011658031	0.092458064	-0.3816	0	92	inactive	-0.93969222	True
Bos_taurus	tRNA-Glu-TTC-22-1	chr9	63039213	63039286	+	39	-14.7	65.7	0.030164384	184	0.001293661	0	-0.2718	0	0	inactive	-0.916701794	True
Bos_taurus	tRNA-Glu-TTC-23-1	chr9	42431043	42431115	-	39	-17	59.3	0.007833333	108	0.005181347	0.164319249	-0.028	0	14	inactive	-0.954049	True
Bos_taurus	tRNA-Glu-TTC-24-1	chr1	84823001	84823073	-	39	-17.9	52.9	0.048694444	40	0.015544041	0.310559006	-0.163	0	26	inactive	-0.907569805	True
Bos_taurus	tRNA-Glu-TTC-25-1	chr17	7780756	7780829	+	39	-25.1	60.8	-0.093684932	351	0.006468305	0.109375	0.0185	0	2	inactive	-0.941500413	True
Bos_taurus	tRNA-Glu-TTC-26-1	chr25	35018006	35018078	+	39	-20.9	62.8	-0.142957746	351	0.006476684	0.19640853	0.07315	0	58	inactive	-0.938118573	True
Bos_taurus	tRNA-Glu-TTC-27-1	chr4	95943523	95943595	-	39	-24.4	61.1	0.053736111	203	0.001295337	0.137578616	-0.39595	0	17	inactive	-0.951710081	True
Bos_taurus	tRNA-Glu-TTC-28-1	chr5	68118343	68118416	+	39	-12.5	56.7	0.016109589	175	0.01164295	0.421122995	-0.0944	0	27	inactive	-0.829798704	True
Bos_taurus	tRNA-Glu-TTC-29-1	chr18	56381017	56381089	-	39	-13.7	54.3	0.045236111	274	0.006476684	0.164835165	-0.00125	0	115	inactive	-0.932333384	True
Bos_taurus	tRNA-Glu-TTC-3-1	chr2	1242934	1243006	-	39	-24.8	70.4	0.730986111	12	0.050518135	0.973411948	-2.55015	0	51	active	0.920234578	True
Bos_taurus	tRNA-Glu-TTC-30-1	chr29	29469572	29469645	+	39	-24.6	68.1	-0.042493151	150	0.003880983	0.084725248	-0.1635	0	26	inactive	-0.951976038	True
Bos_taurus	tRNA-Glu-TTC-4-1	chr12	15143699	15143771	-	39	-26.7	71.2	1.622319444	10	0.058290155	1.001695993	-3.9236	0	15	active	0.950995516	True
Bos_taurus	tRNA-Glu-TTC-4-2	chr21	3276865	3276937	-	39	-26.7	71.2	1.355222222	10	0.055699482	0.969827586	-3.83335	0	0	active	0.901420475	True
Bos_taurus	tRNA-Glu-TTC-5-1	chr3	20935913	20935985	+	39	-18.2	59.4	-0.046763889	8	0.055699482	0.819885476	-1.762684211	3	22	active	0.763068383	True
Bos_taurus	tRNA-Glu-TTC-6-1	chr2	128889749	128889821	-	39	-26.9	73.2	0.102	9	0.029792746	0.454840806	0.04425	0	26	active	0.767733596	True
Bos_taurus	tRNA-Glu-TTC-7-1	chr3	20907957	20908029	-	39	-21.2	59.4	-0.009929577	10	0.054404145	0.930356194	-1.70165	0	30	active	0.773401883	True
Bos_taurus	tRNA-Glu-TTC-8-1	chr23	47691246	47691319	+	39	-26.8	78.5	0.148	40	0.007761966	0.202702703	0.04275	0	34	inactive	-0.907811829	True
Bos_taurus	tRNA-Glu-TTC-9-1	chr7	103685320	103685392	-	39	-19	54.3	0	10	0.022020725	0.186434659	0.09785	0	11	inactive	-0.824190621	True
Bos_taurus	tRNA-Gly-CCC-1-1	chr3	21065481	21065552	+	39	-26.4	79.3	0.050535211	15	0.032425422	0.358312858	-0.38625	4	3	inactive	-0.518896651	True
Bos_taurus	tRNA-Gly-CCC-1-4	chr3	21418303	21418374	-	39	-26.4	79.3	-0.434	6	0.027237354	0.508351489	-0.7155	4	12	active	0.724738131	True
Bos_taurus	tRNA-Gly-CCC-10-1	chr18	23968541	23968614	-	39	-24.5	72.1	-0.123	188	0.016817594	0.231328486	-0.5543	0	27	inactive	-0.891447455	True
Bos_taurus	tRNA-Gly-CCC-11-1	chr26	40096445	40096517	-	39	-19.5	69.1	0.006944444	103	0.005181347	0.17641129	-0.0379	0	23	inactive	-0.955829146	True
Bos_taurus	tRNA-Gly-CCC-12-1	chrX	54998341	54998413	-	39	-22.7	64.5	0.124194444	199	0.005181347	0	0.0176	0	31	inactive	-0.94160809	True
Bos_taurus	tRNA-Gly-CCC-13-1	chr17	47840787	47840860	-	39	-21	63.2	0.02509589	98	0.010349288	0.214460784	-0.377	0	0	inactive	-0.935016589	True
Bos_taurus	tRNA-Gly-CCC-14-1	chr22	18090790	18090862	-	39	-22.6	65.2	?	251	0.002590674	0.05574136	?	0	1	inactive	-0.939320218	True
Bos_taurus	tRNA-Gly-CCC-15-1	chr16	72303516	72303589	+	39	-20.7	72.6	0.008575342	351	0.007761966	0	-0.24085	0	10	inactive	-0.947308858	True
Bos_taurus	tRNA-Gly-CCC-16-1	chr11	101177958	101178031	+	39	-22.9	61.1	0.021821918	191	0.021992238	0.12908778	-0.06735	0	19	inactive	-0.742560358	True
Bos_taurus	tRNA-Gly-CCC-17-1	chr21	23685482	23685555	-	39	-17.5	63.1	-0.063931507	51	0.003880983	0	-0.2959	0	18	inactive	-0.94473592	True
Bos_taurus	tRNA-Gly-CCC-18-1	chr20	58158520	58158593	+	39	-30.1	63.4	0.036178082	122	0.006468305	0.235849057	-0.4789	0	0	inactive	-0.836721134	True
Bos_taurus	tRNA-Gly-CCC-19-1	chr15	49404783	49404856	-	39	-23	65.1	0.074369863	351	0.002587322	0	0.12285	0	14	inactive	-0.954468534	True
Bos_taurus	tRNA-Gly-CCC-2-1	chr3	21254299	21254370	-	39	-26.4	78.9	?	15	0.035019455	0.367892977	?	4	5	active	0.672429637	True
Bos_taurus	tRNA-Gly-CCC-20-1	chr6	93326151	93326224	+	39	-20.2	70.5	-0.016	48	0.012936611	0.449409348	-0.0084	0	13	inactive	-0.704907519	True
Bos_taurus	tRNA-Gly-CCC-21-1	chr23	3352798	3352871	-	39	-20.7	72.7	-0.403616438	83	0.007761966	0.264616935	0.03945	0	3	inactive	-0.881100547	True
Bos_taurus	tRNA-Gly-CCC-22-1	chr1	132740189	132740262	-	39	-19.7	66	0.074273973	125	0.003880983	0.115074799	0.04145	0	0	inactive	-0.922210297	True
Bos_taurus	tRNA-Gly-CCC-23-1	chr25	38775678	38775751	-	39	-17.4	64.7	0.003328767	351	0.01164295	0.141129032	-0.3766	0	16	inactive	-0.956935987	True
Bos_taurus	tRNA-Gly-CCC-24-1	chr18	42704931	42705004	+	39	-20.7	76.2	-0.031356164	66	0.006468305	0.166719594	-0.66085	0	2	inactive	-0.934730418	True
Bos_taurus	tRNA-Gly-CCC-25-1	chr5	29377008	29377081	+	39	-22	66.7	0.094849315	27	0.006468305	0.086206897	-0.64205	0	41	inactive	-0.928389241	True
Bos_taurus	tRNA-Gly-CCC-26-1	chr25	21946737	21946810	+	39	-32.7	68.9	0.02809589	119	0.019404916	0.348953141	-0.1789	0	5	inactive	-0.631211395	True
Bos_taurus	tRNA-Gly-CCC-27-1	chr14	35823113	35823186	-	39	-27	64.7	0.124287671	351	0.002587322	0	-0.082	1	1	inactive	-0.886814927	True
Bos_taurus	tRNA-Gly-CCC-28-1	chr25	37908477	37908550	-	39	-19.1	64.8	0.058246575	144	0.014230272	0.36896479	0.02365	0	65	inactive	-0.899731889	True
Bos_taurus	tRNA-Gly-CCC-29-1	chr25	5188366	5188439	+	39	-22.5	66.7	0.056383562	258	0.01164295	0.369510135	0.02165	0	0	inactive	-0.894523009	True
Bos_taurus	tRNA-Gly-CCC-3-1	chr3	20923354	20923425	+	39	-24.5	75	0.078901408	14	0.018158236	0.137741047	0.02245	2	28	inactive	-0.741631927	True
Bos_taurus	tRNA-Gly-CCC-30-1	chr21	22112332	22112405	-	39	-22.8	68.1	0.058109589	351	0.010349288	0.11888587	-0.26135	0	118	inactive	-0.936636002	True
Bos_taurus	tRNA-Gly-CCC-31-1	chr15	25148868	25148941	+	39	-20.6	71.5	0.097041096	351	0.007761966	0.269645609	-0.39925	0	8	inactive	-0.904785757	True
Bos_taurus	tRNA-Gly-CCC-32-1	chrX	130349684	130349757	-	39	-21.9	65.1	0.09730137	351	0.014230272	0.150645624	0.0748	0	24	inactive	-0.951218515	True
Bos_taurus	tRNA-Gly-CCC-33-1	chr12	34125398	34125471	+	39	-23.6	65.8	0.080178082	84	0.009055627	0.284900285	0.0437	0	32	inactive	-0.894450636	True
Bos_taurus	tRNA-Gly-CCC-34-1	chr8	5204766	5204839	+	39	-17.7	64.7	0.100136986	75	0.010349288	0.307341061	-0.2181	0	3	inactive	-0.864064461	True
Bos_taurus	tRNA-Gly-CCC-4-1	chr3	21178850	21178921	-	39	-24	71.4	0.124084507	0	0.032425422	0.268758227	-0.41035	4	8	active	0.562353539	True
Bos_taurus	tRNA-Gly-CCC-5-1	chr28	40330919	40330990	+	39	-22	70.4	-0.011802817	14	0.007782101	0.178086839	-0.24525	0	0	inactive	-0.953667646	True
Bos_taurus	tRNA-Gly-CCC-6-1	chr3	21225220	21225291	+	39	-21.2	64.1	0.101535211	15	0.029831388	0.361570248	-0.647684211	5	5	active	0.515292265	True
Bos_taurus	tRNA-Gly-CCC-7-1	chr11	68527549	68527620	-	39	-31.4	75.1	1.265591549	5	0.049286641	1.077943615	-3.68895	0	39	active	0.933027045	True
Bos_taurus	tRNA-Gly-CCC-8-1	chr3	21031345	21031416	-	39	-18.4	62.6	0.072774648	15	0.023346304	0.30715226	-0.330578947	4	10	inactive	-0.692629871	True
Bos_taurus	tRNA-Gly-CCC-8-2	chr3	21314668	21314739	+	39	-18.4	62.6	0.073169014	15	0.022049287	0.226098191	-0.349947368	5	0	inactive	-0.69734722	True
Bos_taurus	tRNA-Gly-CCC-9-1	chr6	115452796	115452867	-	39	-24.2	69	0.009225352	20	0.023346304	0.3003003	-0.4293	0	32	inactive	-0.678995421	True
Bos_taurus	tRNA-Gly-GCC-1-1	chr2	39950234	39950305	+	14	-26.4	81	1.084943662	8	0.029831388	0.117924528	-4.32575	1	15	active	0.854675104	True
Bos_taurus	tRNA-Gly-GCC-1-2	chr3	8030457	8030528	+	14	-26.4	81	1.127816901	8	0.022049287	0.574712644	-3.1408	2	15	active	0.98156386	True
Bos_taurus	tRNA-Gly-GCC-1-3	chr18	1453951	1454022	-	14	-26.4	81	1.308830986	10	0.02075227	0.153256705	0.04325	2	29	active	0.523262793	True
Bos_taurus	tRNA-Gly-GCC-1-4	chr18	1454591	1454662	-	14	-26.4	81	1.297887324	7	0.02464332	0.231722312	-0.78325	2	29	active	0.663405396	True
Bos_taurus	tRNA-Gly-GCC-1-5	chr18	1461692	1461763	+	14	-26.4	81	0.846605634	12	0.033722438	0.338345865	-0.6462	2	39	active	0.708541347	True
Bos_taurus	tRNA-Gly-GCC-1-6	chr18	1857484	1857555	+	14	-26.4	81	0.977408451	12	0.062256809	0.775862069	-5.1366	0	69	active	0.987195789	True
Bos_taurus	tRNA-Gly-GCC-1-7	chr19	28379154	28379225	+	14	-26.4	81	0.974084507	7	0.058365759	0.575458636	-3.55975	5	112	active	0.988131548	True
Bos_taurus	tRNA-Gly-GCC-1-8	chr23	30708853	30708924	+	14	-26.4	81	1.098056338	11	0.031128405	0.597826087	-2.80545	1	29	active	0.98311075	True
Bos_taurus	tRNA-Gly-GCC-1-9	chr23	31446851	31446922	+	14	-26.4	81	0.681408451	11	0.023346304	0.758396533	-4.04535	11	41	active	0.906651021	True
Bos_taurus	tRNA-Gly-GCC-2-1	chr3	8104305	8104376	+	14	-28.8	80.9	0.290352113	14	0.101167315	0.979477612	-0.16155	9	10	active	0.799574894	True
Bos_taurus	tRNA-Gly-GCC-3-1	chr3	8112562	8112633	-	14	-26.8	72.9	0.30684507	13	0.09079118	0.90074282	-0.13105	7	4	active	0.924208154	True
Bos_taurus	tRNA-Gly-GCC-4-1	chr6	60918619	60918690	-	14	-17.1	67.6	0.070830986	10	0.005188067	0.064338235	0.12275	0	11	inactive	-0.879826758	True
Bos_taurus	tRNA-Gly-GCC-5-1	chr1	86120007	86120078	-	14	-18.9	65	-0.046140845	315	0.005188067	0	0.0424	0	2	inactive	-0.926859043	True
Bos_taurus	tRNA-Gly-GCC-6-1	chr21	61352180	61352303	-	14	-36.5	64.6	0.102287671	85	0.010935601	0.394207562	-0.0589	0	2	inactive	-0.598735561	True
Bos_taurus	tRNA-Gly-TCC-1-1	chr3	8020915	8020987	-	15	-25.1	73.8	0.956472222	7	0.04015544	0.701320132	-2.1097	3	15	active	0.986610928	True
Bos_taurus	tRNA-Gly-TCC-1-2	chr3	8094818	8094890	-	15	-25.1	73.8	?	11	0.112694301	1.104026846	?	4	10	active	0.967685961	True
Bos_taurus	tRNA-Gly-TCC-1-3	chr3	8111014	8111086	-	15	-25.1	73.8	?	11	0.133419689	1.108823064	?	7	6	active	0.910327608	True
Bos_taurus	tRNA-Gly-TCC-1-4	chr3	21393407	21393479	+	15	-25.1	73.8	1.307361111	9	0.027202073	0.694444444	-2.9969	3	0	active	0.98025292	True
Bos_taurus	tRNA-Gly-TCC-1-5	chr19	28459900	28459972	+	15	-25.1	73.8	1.111138889	6	0.029792746	0.710144928	-2.97315	6	117	active	0.987644368	True
Bos_taurus	tRNA-Gly-TCC-10-1	chr4	47062935	47063008	+	15	-19.2	58.3	0.080191781	47	0.015523933	0.361445783	-0.09595	0	10	inactive	-0.823980996	True
Bos_taurus	tRNA-Gly-TCC-11-1	chr11	6585740	6585813	-	15	-20.8	59.2	0.014328767	51	0.01164295	0.243664717	-0.37735	0	29	inactive	-0.894662641	True
Bos_taurus	tRNA-Gly-TCC-2-1	chr7	20640246	20640318	-	15	-25.1	73.8	0.929625	8	0.051813472	0.792202103	-4.15645	0	36	active	0.987066757	True
Bos_taurus	tRNA-Gly-TCC-3-1	chr6	75196786	75196858	+	15	-23.7	73	-0.049055556	206	0.014248705	0.208333333	-0.0594	0	2	inactive	-0.937520846	True
Bos_taurus	tRNA-Gly-TCC-4-1	chr6	103229182	103229255	+	15	-22.7	73.5	-0.013438356	152	0.006468305	0.135396518	0.14115	0	2	inactive	-0.927641567	True
Bos_taurus	tRNA-Gly-TCC-5-1	chr15	40865382	40865455	+	15	-18.6	72.8	?	124	0.009055627	0.231980116	-0.837636364	0	7	inactive	-0.904124239	True
Bos_taurus	tRNA-Gly-TCC-6-1	chr25	39306150	39306223	+	15	-25.7	67.1	-0.348356164	56	0.03622251	0.361090641	-0.163	0	23	active	0.501851005	True
Bos_taurus	tRNA-Gly-TCC-7-1	chrX	107522038	107522111	+	15	-20.4	65.1	0.123808219	62	0.002587322	0.080515298	-0.12905	0	19	inactive	-0.890154298	True
Bos_taurus	tRNA-Gly-TCC-8-1	chr12	30594435	30594508	+	15	-18.3	60.1	-0.072684932	351	0.012936611	0.333469443	-0.1743	0	17	inactive	-0.929608744	True
Bos_taurus	tRNA-Gly-TCC-9-1	chr22	48346979	48347052	+	15	-20.9	62.7	0.052246575	351	0.003880983	0.050636574	-0.0476	0	51	inactive	-0.942046155	True
Bos_taurus	tRNA-His-GTG-1-1	chr3	20919032	20919104	+	15	-25.5	60.1	0.416805556	15	0.045336788	0.741433022	-0.8384	2	29	active	0.979173626	True
Bos_taurus	tRNA-His-GTG-1-10	chr3	21382863	21382935	-	15	-25.5	60.1	0.123888889	25	0.03238342	0.629968502	-0.5387	1	0	active	0.884738144	True
Bos_taurus	tRNA-His-GTG-1-11	chr3	21394289	21394361	+	15	-25.5	60.1	1.29075	28	0.067357513	0.908018868	-1.186	3	0	active	0.968454906	True
Bos_taurus	tRNA-His-GTG-1-12	chr8	29781414	29781486	+	15	-25.5	60.1	0.932305556	14	0.019430052	0.299145299	-0.16295	0	4	active	0.538379489	True
Bos_taurus	tRNA-His-GTG-1-13	chr10	65462234	65462306	-	15	-25.5	60.1	1.486777778	30	0.06865285	0.903954802	0.44995	2	70	active	0.951499689	True
Bos_taurus	tRNA-His-GTG-1-14	chr10	65462969	65463041	+	15	-25.5	60.1	1.591208333	33	0.054404145	0.784313725	-0.93465	2	71	active	0.981554485	True
Bos_taurus	tRNA-His-GTG-1-15	chr10	65464501	65464573	+	15	-25.5	60.1	1.427083333	34	0.041450777	0.552174893	0.0164	2	74	active	0.935642839	True
Bos_taurus	tRNA-His-GTG-1-2	chr3	20944853	20944925	+	15	-25.5	60.1	0.416805556	11	0.047927461	0.802752294	-0.6693	4	22	active	0.963534099	True
Bos_taurus	tRNA-His-GTG-1-4	chr3	21142792	21142864	-	15	-25.5	60.1	0.123888889	25	0.042746114	0.964746845	-0.42855	2	8	active	0.913056442	True
Bos_taurus	tRNA-His-GTG-1-7	chr3	21300689	21300761	+	15	-25.5	60.1	0.123944444	195	0.041450777	1.056763285	-0.53645	1	0	active	0.797378226	True
Bos_taurus	tRNA-His-GTG-1-9	chr3	21351438	21351510	+	15	-25.5	60.1	0.123944444	31	0.050518135	0.857843137	0.04515	1	0	active	0.893772798	True
Bos_taurus	tRNA-Ile-AAT-1-1	chr19	28465497	28465571	-	17	-25.5	81.2	1.254108108	10	0.051679587	0.591216216	-4.24685	6	120	active	0.988759297	True
Bos_taurus	tRNA-Ile-AAT-1-13	chr23	31098083	31098157	+	17	-25.5	81.2	0.499486486	13	0.036175711	0.889704844	-2.4805	3	19	active	0.986705314	True
Bos_taurus	tRNA-Ile-AAT-1-14	chr23	31312887	31312961	-	17	-25.5	81.2	1.307756757	8	0.029715762	0.757575758	-3.57475	4	48	active	0.988074621	True
Bos_taurus	tRNA-Ile-AAT-1-15	chr23	31483884	31483958	+	17	-25.5	81.2	0.124148649	31	0.034883721	0.502873563	-0.53975	0	31	active	0.908639194	True
Bos_taurus	tRNA-Ile-AAT-1-2	chr21	68760605	68760679	+	17	-25.5	81.2	0.988662162	13	0.067183463	0.894886364	-3.3785	0	35	active	0.986869226	True
Bos_taurus	tRNA-Ile-AAT-1-3	chr23	30804999	30805073	-	17	-25.5	81.2	0.240581081	1	0.016795866	0.098870056	-0.58085	2	25	inactive	-0.751120285	True
Bos_taurus	tRNA-Ile-AAT-1-4	chr23	30806742	30806816	-	17	-25.5	81.2	0.502013514	13	0.036175711	0.751879699	-2.15285	3	23	active	0.985613295	True
Bos_taurus	tRNA-Ile-AAT-1-5	chr23	30820618	30820692	-	17	-25.5	81.2	0.288351351	12	0.029715762	0.480109739	-3.3322	6	20	active	0.981707618	True
Bos_taurus	tRNA-Ile-AAT-1-9	chr23	30912746	30912820	+	17	-25.5	81.2	0.260135135	40	0.054263566	0.841239722	-1.18585	15	10	active	0.85003817	True
Bos_taurus	tRNA-Ile-AAT-2-1	chr19	28442791	28442865	+	17	-25.5	80.6	1.596445946	13	0.041343669	0.887681159	-5.63825	3	113	active	0.988662871	True
Bos_taurus	tRNA-Ile-AAT-3-1	chr23	38090929	38091003	-	17	-16.5	70.4	0.007175676	2	0.012919897	0.096021948	-0.0272	0	0	inactive	-0.839065294	True
Bos_taurus	tRNA-Ile-TAT-1-1	chr18	49378189	49378282	-	7	-29.7	73.8	1.430797297	1	0.049180328	0.649033769	0.13865	0	128	active	0.974888269	True
Bos_taurus	tRNA-Ile-TAT-1-2	chr23	31153311	31153405	-	7	-32.8	73.7	0.774824324	3	0.042821159	0.521972559	-1.5316	1	9	active	0.979536374	True
Bos_taurus	tRNA-Ile-TAT-2-1	chr1	95121882	95121976	-	7	-33.5	73.1	0.715594595	2	0.032745592	0.533943555	-2.4075	2	14	active	0.984856419	True
Bos_taurus	tRNA-Ile-TAT-2-2	chr11	25217492	25217585	+	7	-30.2	73.2	1.420256757	6	0.088272383	0.884744142	0.2229	0	18	active	0.973379011	True
Bos_taurus	tRNA-Ile-TAT-2-3	chr23	30835097	30835191	-	7	-33.3	73.1	1.005662162	2	0.05163728	0.760869565	-0.7457	1	18	active	0.973711802	True
Bos_taurus	tRNA-Ile-TAT-3-1	chr23	14605588	14605661	-	7	-23	71.8	0.073808219	297	0.010349288	0	-0.03745	0	0	inactive	-0.88081999	True
Bos_taurus	tRNA-Ile-TAT-4-1	chr10	68506325	68506398	-	7	-19.9	59.6	0.121958904	158	0.005174644	0	0.0417	0	0	inactive	-0.843639905	True
Bos_taurus	tRNA-iMet-CAT-1-1	chr3	16772364	16772436	-	32	-26.1	60.4	1.585513889	6	0.033678756	0.762250454	-4.01595	0	77	active	0.943633826	True
Bos_taurus	tRNA-iMet-CAT-1-2	chr7	8534281	8534353	-	32	-26.1	60.4	0.124055556	4	0.012953368	0.102459016	-0.13985	0	64	inactive	-0.855956937	True
Bos_taurus	tRNA-iMet-CAT-1-3	chr12	21729664	21729736	-	32	-26.1	60.4	0.489333333	11	0.019430052	0.36036036	-2.2849	0	44	active	0.560137966	True
Bos_taurus	tRNA-iMet-CAT-1-4	chr23	30709280	30709352	+	32	-26.1	60.4	1.170708333	4	0.037564767	0.719054956	-4.20865	1	29	active	0.927612409	True
Bos_taurus	tRNA-iMet-CAT-1-5	chr23	30784681	30784753	-	32	-26.1	60.4	-0.082430556	4	0.028497409	0.643274854	-3.4914	5	32	active	0.831913436	True
Bos_taurus	tRNA-iMet-CAT-1-6	chr23	30892181	30892253	-	32	-26.1	60.4	0.180347222	12	0.014248705	0.232815965	-0.37615	5	7	inactive	-0.92332739	True
Bos_taurus	tRNA-iMet-CAT-1-7	chr23	31038894	31038966	+	32	-26.1	60.4	-0.1055	10	0.027202073	0.444484761	-3.1216	1	25	active	0.736366671	True
Bos_taurus	tRNA-iMet-CAT-1-8	chr23	31447285	31447357	+	32	-26.1	60.4	1.048013889	11	0.018134715	0.438596491	-2.70775	11	41	active	0.656773921	True
Bos_taurus	tRNA-iMet-CAT-1-9	chr23	31455880	31455952	-	32	-26.1	60.4	1.112902778	7	0.03238342	1.166666667	-4.75515	7	40	active	0.904967759	True
Bos_taurus	tRNA-iMet-CAT-2-1	chr18	55102818	55102890	-	32	-23.3	58.1	0.101763889	9	0.025906736	0.15625	-0.00415	0	51	inactive	-0.640391408	True
Bos_taurus	tRNA-iMet-CAT-3-1	chr19	50740035	50740107	+	32	-26.1	60.2	0.285111111	10	0.015544041	0.123784262	-2.0022	1	53	inactive	-0.838007394	True
Bos_taurus	tRNA-iMet-CAT-3-2	chr23	30855588	30855660	+	32	-26.1	60.2	0.696569444	40	0.029792746	0.803744921	-2.22025	5	7	active	0.863873037	True
Bos_taurus	tRNA-iMet-CAT-3-5	chr23	30920737	30920809	+	32	-26.1	60.2	0.320013889	7	0.044041451	0.87182971	-0.76155	12	11	active	0.797395312	True
Bos_taurus	tRNA-iMet-CAT-3-6	chr23	31436342	31436414	+	32	-26.1	60.2	0.505916667	8	0.019430052	0.16998543	-2.22115	5	49	active	0.525693795	True
Bos_taurus	tRNA-Leu-AAG-1-1	chr1	95182752	95182834	+	9	-30.7	74.8	0.259219512	79	0.028132992	0.718390805	-1.7451	4	17	active	0.959938889	True
Bos_taurus	tRNA-Leu-AAG-1-2	chr10	26471454	26471536	+	9	-30.7	74.8	0.31504878	7	0.029411765	0.493553586	-1.4383	5	18	active	0.980605901	True
Bos_taurus	tRNA-Leu-AAG-1-3	chr10	26516546	26516628	-	9	-30.7	74.8	1.231890244	5	0.049872123	0.628507295	-3.81015	3	17	active	0.98839059	True
Bos_taurus	tRNA-Leu-AAG-1-4	chr23	29870869	29870951	-	9	-30.7	74.8	0.633878049	6	0.046035806	0.757731959	-2.1343	2	26	active	0.986825001	True
Bos_taurus	tRNA-Leu-AAG-1-5	chr23	29892277	29892359	+	9	-30.7	74.8	0.620841463	6	0.034526854	0.584795322	-2.42845	5	25	active	0.987146057	True
Bos_taurus	tRNA-Leu-AAG-1-6	chr23	29998245	29998327	+	9	-30.7	74.8	0.124292683	4	0.02685422	0.336538462	-0.55915	4	6	active	0.766340891	True
Bos_taurus	tRNA-Leu-AAG-1-7	chr25	20180858	20180940	+	9	-30.7	74.8	1.547890244	8	0.066496164	0.768555116	-4.61385	0	47	active	0.987829706	True
Bos_taurus	tRNA-Leu-AAG-2-1	chr7	41710187	41710269	+	9	-30.7	74.1	-0.146512195	13	0.033248082	0.579819277	-3.3274	1	40	active	0.944795963	True
Bos_taurus	tRNA-Leu-AAG-3-1	chr23	31571137	31571219	-	9	-26.8	63.4	-0.057146341	3	0.015345269	0	-0.22375	0	36	inactive	-0.808826057	True
Bos_taurus	tRNA-Leu-CAA-1-1	chr23	29926523	29926629	+	8	-41.6	78.1	1.182880952	6	0.042183623	0.81981982	-2.73465	1	22	active	0.984532634	True
Bos_taurus	tRNA-Leu-CAA-2-1	chr7	44000016	44000122	+	8	-38.5	75.6	0.873321429	6	0.060794045	0.667429443	-2.25675	1	35	active	0.983978013	True
Bos_taurus	tRNA-Leu-CAA-2-2	chr23	30848490	30848597	+	8	-40.3	75.6	0.658916667	8	0.033457249	0.495049505	-2.55715	4	7	active	0.97675445	True
Bos_taurus	tRNA-Leu-CAA-2-3	chr23	30852305	30852413	-	8	-39.7	75.5	0.381154762	8	0.013613861	0.311609687	-1.1265	5	7	inactive	-0.564038475	True
Bos_taurus	tRNA-Leu-CAA-3-1	chr23	29897374	29897485	-	8	-42.7	74.7	0.66727381	3	0.044389642	0.696570729	-2.2605	4	25	active	0.984569023	True
Bos_taurus	tRNA-Leu-CAA-4-1	chr23	30867359	30867466	+	8	-40.2	78.3	0.114916667	8	0.038413879	0.635901163	-1.41335	4	5	active	0.973880375	True
Bos_taurus	tRNA-Leu-CAA-5-1	chr9	42539836	42539918	+	8	-24.1	64.6	0.039878049	351	0.007672634	0.161030596	-0.4145	0	9	inactive	-0.92361968	True
Bos_taurus	tRNA-Leu-CAA-6-1	chr2	35207438	35207520	-	8	-25.7	60.2	0.038621951	351	0.008951407	0.097847358	-0.315	0	12	inactive	-0.870211275	True
Bos_taurus	tRNA-Leu-CAG-1-1	chr3	8102946	8103029	+	5	-35.7	78.2	0.325879518	8	0.125159642	0.945857795	-0.0721	8	10	active	0.719000477	True
Bos_taurus	tRNA-Leu-CAG-1-2	chr3	8114071	8114154	-	5	-35.7	78.2	0.336277108	8	0.121328225	0.945261635	-0.13105	6	4	active	0.846141987	True
Bos_taurus	tRNA-Leu-CAG-1-3	chr23	31339943	31340026	-	5	-35.7	78.2	1.327746988	9	0.039591315	1.008381351	-4.446	3	54	active	0.985429065	True
Bos_taurus	tRNA-Leu-CAG-2-1	chr3	8021636	8021719	+	5	-32.8	77.3	1.011349398	8	0.037037037	0.639756283	-4.2433	3	15	active	0.985862353	True
Bos_taurus	tRNA-Leu-CAG-2-2	chr18	25388949	25389032	+	5	-32.8	77.3	1.099168675	10	0.040868455	0.677486599	-2.17875	0	22	active	0.982666317	True
Bos_taurus	tRNA-Leu-TAA-1-1	chr9	82695969	82696052	+	6	-32.3	88.1	1.29526506	6	0.095785441	1.058620193	-0.9402	0	7	active	0.964946561	True
Bos_taurus	tRNA-Leu-TAA-2-1	chr23	31053523	31053606	-	6	-31.4	86.5	0.085373494	7	0.029374202	0.661145016	-0.26055	3	24	active	0.898842293	True
Bos_taurus	tRNA-Leu-TAA-3-1	chr23	31079926	31080009	+	6	-28.8	80.6	0.303891566	7	0.019157088	0.537909836	-1.3884	2	19	active	0.927466634	True
Bos_taurus	tRNA-Leu-TAA-4-1	chr15	84096212	84096295	+	6	-27.9	80.8	0.090493976	13	0.03192848	0.547575025	-3.39165	5	31	active	0.978763445	True
Bos_taurus	tRNA-Leu-TAA-5-1	chr23	30791697	30791780	+	6	-33.5	89.4	0.622421687	7	0.01660281	0.270531401	-2.13725	4	29	active	0.667742037	True
Bos_taurus	tRNA-Leu-TAA-6-1	chr18	38977397	38977478	-	6	-19.6	60.9	-0.000246914	7	0.007682458	0.168350168	0.0321	0	0	inactive	-0.854213802	True
Bos_taurus	tRNA-Leu-TAG-1-1	chr10	26469787	26469869	+	4	-32.4	76.2	0.043829268	3	0.033248082	0.558213716	-2.198	4	18	active	0.93339872	True
Bos_taurus	tRNA-Leu-TAG-2-1	chr19	28373767	28373849	-	4	-33.3	75.2	1.581914634	8	0.033248082	0.542355372	-2.7504	4	102	active	0.986671915	True
Bos_taurus	tRNA-Leu-TAG-3-1	chr25	20082378	20082460	-	4	-30.8	73.9	1.484756098	17	0.04859335	1.062091503	-3.6541	0	55	active	0.980548883	True
Bos_taurus	tRNA-Leu-TAG-4-1	chr10	26504464	26504546	-	4	-29.2	74.1	0.900890244	8	0.02685422	0.716679077	-3.4668	3	19	active	0.985680124	True
Bos_taurus	tRNA-Lys-CTT-1-1	chr3	21395380	21395453	+	28	-28	87.8	1.089712329	8	0.053040103	0.940438871	-3.8004	3	0	active	0.916182595	True
Bos_taurus	tRNA-Lys-CTT-1-10	chr25	2613400	2613473	+	28	-28	87.8	0.276410959	10	0.040103493	0.637871332	-0.98255	13	43	active	0.812412562	True
Bos_taurus	tRNA-Lys-CTT-1-13	chr25	2623855	2623928	+	28	-28	87.8	-0.139383562	3	0.032341527	0.522165388	-1.0137	15	47	active	0.756621329	True
Bos_taurus	tRNA-Lys-CTT-1-14	chr25	2630203	2630276	+	28	-28	87.8	-0.852708333	2	0.032341527	0.315031503	-1.129	12	48	active	0.627841142	True
Bos_taurus	tRNA-Lys-CTT-1-15	chr25	2635163	2635236	+	28	-28	87.8	0.122150685	6	0.025873221	0.502032034	-1.51525	6	45	active	0.871111017	True
Bos_taurus	tRNA-Lys-CTT-1-2	chr7	41736290	41736363	+	28	-28	87.8	1.089424658	9	0.031047865	0.660150892	-2.65575	2	38	active	0.911889154	True
Bos_taurus	tRNA-Lys-CTT-1-3	chr7	41748396	41748469	-	28	-28	87.8	0.233191781	8	0.03622251	0.47879617	-3.69925	2	37	active	0.890016561	True
Bos_taurus	tRNA-Lys-CTT-1-4	chr23	31310407	31310480	-	28	-28	87.8	0.959657534	9	0.03622251	0.492957746	-4.5671	4	45	active	0.918325248	True
Bos_taurus	tRNA-Lys-CTT-1-5	chr25	2593043	2593116	-	28	-28	87.8	0.492178082	4	0.046571798	0.779352227	-4.13155	6	43	active	0.940788823	True
Bos_taurus	tRNA-Lys-CTT-1-6	chr25	2597596	2597669	-	28	-28	87.8	0.344849315	3	0.020698577	0.113636364	-1.192	6	39	active	0.564943611	True
Bos_taurus	tRNA-Lys-CTT-1-7	chr25	2603761	2603834	+	28	-28	87.8	0.245849315	5	0.058214748	0.586316346	-2.5813	9	40	active	0.86228778	True
Bos_taurus	tRNA-Lys-CTT-1-8	chr25	2605206	2605279	-	28	-28	87.8	0.261273973	4	0.053040103	0.736002804	-1.76335	8	40	active	0.874401429	True
Bos_taurus	tRNA-Lys-CTT-1-9	chr25	2608819	2608892	+	28	-28	87.8	0.257958904	4	0.034928849	0.257400257	-2.182	9	41	active	0.723941203	True
Bos_taurus	tRNA-Lys-CTT-10-1	chr1	97965856	97965929	+	28	-25.4	65.2	0	130	0.006468305	0.185185185	-0.1171	0	26	inactive	-0.963718642	True
Bos_taurus	tRNA-Lys-CTT-11-1	chr4	32242282	32242355	+	28	-17.2	53.4	-0.015328767	110	0.003880983	0.305010893	0.02335	0	14	inactive	-0.933401298	True
Bos_taurus	tRNA-Lys-CTT-12-1	chr16	12668675	12668748	+	28	-19.1	58.9	0.057767123	95	0.002587322	0.14632107	-0.35085	0	23	inactive	-0.957944228	True
Bos_taurus	tRNA-Lys-CTT-13-1	chr19	17588946	17589020	+	28	-26	56.5	-0.019945946	61	0.006459948	0.123326286	0.08755	0	20	inactive	-0.931712426	True
Bos_taurus	tRNA-Lys-CTT-2-1	chr10	70793281	70793354	-	28	-30.1	88	1.277027397	9	0.028460543	0.578703704	-3.90065	0	39	active	0.907080663	True
Bos_taurus	tRNA-Lys-CTT-2-2	chr21	30797555	30797628	-	28	-30.1	88	0.348986301	77	0.028460543	0.929330065	-2.3836	0	21	active	0.873964901	True
Bos_taurus	tRNA-Lys-CTT-3-1	chr25	2625594	2625667	+	28	-25.5	79.8	-0.139383562	3	0.042690815	0.674311927	-0.9899	16	47	active	0.790440629	True
Bos_taurus	tRNA-Lys-CTT-4-1	chr4	75841391	75841464	-	28	-27.1	85.8	-0.013520548	187	0.006468305	0.054347826	0.03585	0	0	inactive	-0.788788235	True
Bos_taurus	tRNA-Lys-CTT-5-1	chr15	63431604	63431691	-	28	-26.2	65.1	0.018965517	4	0.007623888	0.249287749	0.04315	0	16	inactive	-0.84043307	True
Bos_taurus	tRNA-Lys-CTT-6-1	chr10	94199939	94200012	-	28	-28.6	69.1	-0.013780822	351	0.006468305	0.07772596	0.12295	0	0	inactive	-0.855359328	True
Bos_taurus	tRNA-Lys-CTT-7-1	chr27	29960005	29960078	-	28	-13.1	58.4	-0.032835616	3	0.009055627	0.335019828	0.04365	0	0	inactive	-0.8522165	True
Bos_taurus	tRNA-Lys-CTT-8-1	chr6	30502846	30502919	-	28	-16.5	64.1	0.073876712	328	0.010349288	0.22917758	-0.0585	0	0	inactive	-0.932816485	True
Bos_taurus	tRNA-Lys-CTT-9-1	chr7	41046570	41046643	-	28	-22.3	62.6	-0.035191781	114	0.005174644	0.165328295	0.13745	0	16	inactive	-0.962643782	True
Bos_taurus	tRNA-Lys-TTT-1-1	chr15	84100841	84100914	+	38	-27.5	87.8	0.937972603	7	0.023285899	0.339147287	-3.9003	6	35	active	0.736654554	True
Bos_taurus	tRNA-Lys-TTT-1-2	chr15	84102583	84102656	-	38	-27.5	87.8	1.230328767	3	0.099611902	0.820859488	-3.91995	6	37	active	0.944750531	True
Bos_taurus	tRNA-Lys-TTT-1-3	chr16	2058397	2058470	+	38	-27.5	87.8	0.440547945	8	0.033635188	0.657071339	-3.18625	1	50	active	0.913173698	True
Bos_taurus	tRNA-Lys-TTT-1-4	chr16	2058731	2058804	-	38	-27.5	87.8	1.344712329	7	0.055627426	1.190644933	-3.59955	1	50	active	0.951625961	True
Bos_taurus	tRNA-Lys-TTT-1-5	chr19	28372610	28372683	+	38	-27.5	87.8	1.608452055	5	0.042690815	0.82972583	-5.14535	4	102	active	0.974712003	True
Bos_taurus	tRNA-Lys-TTT-1-6	chr23	29889143	29889216	-	38	-27.5	87.8	0.226767123	11	0.021992238	0.094594595	-2.0187	5	26	active	0.656194384	True
Bos_taurus	tRNA-Lys-TTT-1-7	chr23	30021492	30021565	+	38	-27.5	87.8	-0.773136986	9	0.021992238	0.535714286	-3.22685	6	5	active	0.770752643	True
Bos_taurus	tRNA-Lys-TTT-1-8	chr23	30819859	30819932	+	38	-27.5	87.8	0.079712329	6	0.037516171	0.54908113	-0.4702	6	20	active	0.80538141	True
Bos_taurus	tRNA-Lys-TTT-10-1	chr12	35096694	35096767	-	38	-28	84.9	-0.187876712	56	0.006468305	0.132575758	-0.3476	0	0	inactive	-0.711101452	True
Bos_taurus	tRNA-Lys-TTT-10-2	chrX	107099646	107099719	-	38	-28	84.9	0	217	0.007761966	0.234113712	0.1407	0	3	inactive	-0.744146498	True
Bos_taurus	tRNA-Lys-TTT-11-1	chr10	93996239	93996312	-	38	-29.6	69	0.123890411	40	0.01164295	0.173611111	-0.521	0	12	inactive	-0.853949549	True
Bos_taurus	tRNA-Lys-TTT-12-1	chr16	10310596	10310669	-	38	-20	73.9	0.10130137	200	0.001293661	0	0.01365	0	0	inactive	-0.893251117	True
Bos_taurus	tRNA-Lys-TTT-13-1	chr5	19220443	19220516	+	38	-16.8	68.7	0.101506849	221	0.003880983	0.074515648	0.12245	0	7	inactive	-0.916276397	True
Bos_taurus	tRNA-Lys-TTT-14-1	chr1	126326765	126326838	-	38	-19.6	65.2	0.057863014	52	0.014230272	0.310903842	-0.148	0	4	inactive	-0.901757486	True
Bos_taurus	tRNA-Lys-TTT-15-1	chr5	87665268	87665341	-	38	-25.1	72.3	0.05909589	351	0.012936611	0.345849802	-0.333	0	0	inactive	-0.885284193	True
Bos_taurus	tRNA-Lys-TTT-16-1	chr13	77205866	77205939	-	38	-20.4	74.1	0.05769863	123	0.01164295	0.538461538	-0.14515	0	0	inactive	-0.615480163	True
Bos_taurus	tRNA-Lys-TTT-17-1	chr1	61495443	61495516	-	38	-23.8	62.3	0.101287671	351	0.01164295	0.271493213	-0.22935	0	0	inactive	-0.883340984	True
Bos_taurus	tRNA-Lys-TTT-18-1	chr24	12712721	12712794	-	38	-24.2	67.9	0.029726027	6	0.015523933	0.481904013	-0.11165	0	23	inactive	-0.5618257	True
Bos_taurus	tRNA-Lys-TTT-19-1	chr19	17401125	17401197	-	38	-19.7	66.3	0.014638889	92	0.007772021	0.228087325	-0.0006	0	1	inactive	-0.936164898	True
Bos_taurus	tRNA-Lys-TTT-2-1	chr23	29970288	29970361	-	38	-26	86.8	-0.177013699	14	0.007761966	0.077691454	-1.555	4	14	inactive	-0.702365301	True
Bos_taurus	tRNA-Lys-TTT-2-2	chr23	30857472	30857545	+	38	-26	86.8	0.221561644	16	0.016817594	0.384615385	-1.3637	6	7	inactive	-0.569383749	True
Bos_taurus	tRNA-Lys-TTT-2-3	chr23	30860751	30860824	-	38	-26	86.8	0.138630137	10	0.009055627	0.296296296	-1.8008	5	7	inactive	-0.645640138	True
Bos_taurus	tRNA-Lys-TTT-20-1	chr6	74265896	74265969	-	38	-15.7	64.6	-0.169082192	139	0.002587322	0.081395349	-0.06415	0	3	inactive	-0.899258583	True
Bos_taurus	tRNA-Lys-TTT-21-1	chr17	59377772	59377844	-	38	-19.1	55.6	0.079347222	266	0.010362694	0.249598859	-0.05845	0	41	inactive	-0.945066992	True
Bos_taurus	tRNA-Lys-TTT-22-1	chr21	58373890	58373963	-	38	-20.2	61.3	0.057835616	218	0.012936611	0	-0.01155	0	22	inactive	-0.948039492	True
Bos_taurus	tRNA-Lys-TTT-23-1	chr4	106326647	106326720	-	38	-20.6	53.5	-0.05360274	59	0.007761966	0	-0.2224	0	55	inactive	-0.945768838	True
Bos_taurus	tRNA-Lys-TTT-24-1	chr4	92385174	92385246	-	38	-12.3	55.3	-0.038513889	285	0.007772021	0.355041591	-0.2683	0	10	inactive	-0.928247599	True
Bos_taurus	tRNA-Lys-TTT-25-1	chr19	23775663	23775736	-	38	-20.2	57.9	-0.012972603	135	0.009055627	0.374531835	0.13415	0	7	inactive	-0.916435151	True
Bos_taurus	tRNA-Lys-TTT-26-1	chr24	1997467	1997540	+	38	-22.2	53.9	-0.04269863	351	0.042690815	0.238527942	-0.4496	0	0	inactive	-0.729667345	True
Bos_taurus	tRNA-Lys-TTT-27-1	chr18	56413031	56413104	+	38	-19.8	53.5	0.054493151	190	0.016817594	0.356506239	-0.1724	0	110	inactive	-0.852586133	True
Bos_taurus	tRNA-Lys-TTT-28-1	chr20	10156121	10156194	+	38	-16.6	56.2	-0.145465753	351	0.009055627	0.16252612	-0.64965	0	43	inactive	-0.942274542	True
Bos_taurus	tRNA-Lys-TTT-3-1	chr23	31034683	31034756	+	38	-28	85.2	0.375287671	38	0.007761966	0.179487179	-3.3119	1	27	inactive	-0.62248824	True
Bos_taurus	tRNA-Lys-TTT-4-1	chr23	30065854	30065927	-	38	-26	80.3	-0.150835616	13	0.005174644	0.108124807	0.01835	1	12	inactive	-0.830383822	True
Bos_taurus	tRNA-Lys-TTT-5-1	chr23	31314323	31314396	+	38	-23.1	77.7	0.540890411	6	0.019404916	0.727650728	-1.75605	4	47	active	0.800281634	True
Bos_taurus	tRNA-Lys-TTT-6-1	chr3	32810215	32810288	+	38	-28	87.4	0.113917808	13	0.002587322	0	-0.28075	0	2	inactive	-0.717724451	True
Bos_taurus	tRNA-Lys-TTT-7-1	chr17	14766724	14766797	+	38	-26.8	87.4	-0.133369863	19	0.012936611	0.518518519	-0.16705	0	2	active	0.514479745	True
Bos_taurus	tRNA-Lys-TTT-8-1	chr7	19902114	19902187	+	38	-24.1	81.3	?	351	0.010349288	0.486111111	?	0	77	inactive	-0.534257888	True
Bos_taurus	tRNA-Lys-TTT-9-1	chr1	113753401	113753474	+	38	-28	83.9	-0.048287671	154	0	0	-0.09135	0	0	inactive	-0.762186539	True
Bos_taurus	tRNA-Met-CAT-1-1	chr23	31188817	31188890	+	32	-24	76.5	-0.022534247	6	0.023285899	0.603864734	-3.95825	6	10	active	0.744512206	True
Bos_taurus	tRNA-Met-CAT-10-1	chr9	46787931	46788004	-	32	-20.6	57.6	-0.01369863	8	0.002587322	0	-0.45875	0	2	inactive	-0.929750853	True
Bos_taurus	tRNA-Met-CAT-11-1	chr25	28699728	28699801	+	32	-15.4	54.7	-0.025739726	8	0.006468305	0.095238095	0.0427	0	19	inactive	-0.917352969	True
Bos_taurus	tRNA-Met-CAT-12-1	chr5	113151740	113151813	+	32	-13.5	65.2	-0.152068493	69	0.009055627	0.243258271	0.0955	0	46	inactive	-0.913736972	True
Bos_taurus	tRNA-Met-CAT-13-1	chr13	65353733	65353806	+	32	-18.4	55.6	0.014178082	351	0.010349288	0.214559387	0.07875	0	51	inactive	-0.946329111	True
Bos_taurus	tRNA-Met-CAT-2-1	chr14	18213939	18214012	+	32	-25	82.3	0.98830137	6	0.069857697	0.851384223	-2.30275	0	41	active	0.940699277	True
Bos_taurus	tRNA-Met-CAT-3-1	chr23	29886133	29886206	+	32	-25.8	77.4	1.039273973	6	0.021992238	0.737547893	-3.20575	3	26	active	0.850085851	True
Bos_taurus	tRNA-Met-CAT-3-2	chr23	29891395	29891468	-	32	-25.8	77.4	1.10109589	8	0.028460543	0.579644685	-2.57815	5	25	active	0.888200383	True
Bos_taurus	tRNA-Met-CAT-3-3	chr23	30771293	30771366	-	32	-25.8	77.4	0.123958904	4	0.019404916	0.285947712	-0.5252	2	33	inactive	-0.589942415	True
Bos_taurus	tRNA-Met-CAT-4-1	chr23	31184101	31184174	+	32	-26.7	77.9	-0.03309589	8	0.01164295	0.225806452	-4.0707	8	11	inactive	-0.760915549	True
Bos_taurus	tRNA-Met-CAT-5-1	chr1	95177691	95177764	-	32	-24.3	77.5	-0.434232877	6	0.019404916	0.378460208	-2.39225	4	18	active	0.520358099	True
Bos_taurus	tRNA-Met-CAT-6-1	chr18	39783680	39783753	-	32	-24	81.2	0.647506849	5	0.068564036	0.902061856	-1.5825	0	33	active	0.939474969	True
Bos_taurus	tRNA-Met-CAT-6-2	chr23	31192780	31192853	-	32	-24	81.2	0.415575342	3	0.028460543	0.248756219	-3.28755	6	9	active	0.723670621	True
Bos_taurus	tRNA-Met-CAT-7-1	chr14	20088184	20088257	-	32	-25.9	75.1	0.256452055	6	0.012936611	0.462875496	-1.15155	0	0	inactive	-0.531668076	True
Bos_taurus	tRNA-Met-CAT-8-1	chr23	31173160	31173233	+	32	-26.7	79.8	-0.089684932	9	0.012936611	0.287828947	-4.008	4	10	inactive	-0.5836207	True
Bos_taurus	tRNA-Met-CAT-9-1	chr23	31177169	31177242	+	32	-19.8	69.5	-0.080767123	4	0.012936611	0	-4.17745	6	11	inactive	-0.728031362	True
Bos_taurus	tRNA-Phe-AAA-1-1	chr20	48744375	48744448	+	1	-11.2	61.5	-0.041027397	351	0	0	-0.14275	0	0	inactive	-0.87978302	True
Bos_taurus	tRNA-Phe-GAA-1-1	chr7	45426778	45426851	-	22	-21.9	88.9	0.465684932	4	0.072445019	1.07725454	-0.8286	1	77	active	0.969071769	True
Bos_taurus	tRNA-Phe-GAA-1-2	chr12	69597552	69597625	-	22	-21.9	88.9	1.068643836	9	0.067270375	0.890346767	-2.6285	0	30	active	0.986743842	True
Bos_taurus	tRNA-Phe-GAA-1-3	chr17	53130611	53130684	+	22	-21.9	88.9	1.247041096	10	0.04915912	0.537280702	-2.58765	4	35	active	0.988108731	True
Bos_taurus	tRNA-Phe-GAA-1-4	chr23	29874967	29875040	+	22	-21.9	88.9	0.551780822	13	0.021992238	0.629173087	-1.55835	2	26	active	0.967187584	True
Bos_taurus	tRNA-Phe-GAA-1-5	chr23	29959425	29959498	+	22	-21.9	88.9	0.242109589	6	0.025873221	0.562571757	-2.02745	2	14	active	0.981078868	True
Bos_taurus	tRNA-Phe-GAA-1-6	chr23	29988372	29988445	+	22	-21.9	88.9	-0.07869863	9	0.020698577	0.270200721	-2.067166667	4	11	active	0.67451678	True
Bos_taurus	tRNA-Phe-GAA-10-1	chrX	132031449	132031524	+	22	-20.2	62	?	7	0.033548387	0.561797753	?	6	23	active	0.911161217	True
Bos_taurus	tRNA-Phe-GAA-2-1	chr15	84101756	84101829	-	22	-21.9	87.9	1.203493151	4	0.06080207	0.987654321	-3.04465	6	35	active	0.987735939	True
Bos_taurus	tRNA-Phe-GAA-2-2	chr15	84107177	84107250	-	22	-21.9	87.9	0.256958904	4	0.034928849	0.463855422	-3.82155	3	42	active	0.987144811	True
Bos_taurus	tRNA-Phe-GAA-2-3	chr23	30006509	30006582	-	22	-21.9	87.9	-0.180626866	8	0.01164295	0.072765073	-2.1565625	4	2	inactive	-0.561891028	True
Bos_taurus	tRNA-Phe-GAA-2-4	chr23	30016597	30016670	+	22	-21.9	87.9	-0.073452055	8	0.014230272	0.160734788	-1.91675	5	5	inactive	-0.598195876	True
Bos_taurus	tRNA-Phe-GAA-2-5	chr23	30822324	30822397	-	22	-21.9	87.9	0.325970149	4	0.016817594	0.37037037	-1.88395	5	20	active	0.635994821	True
Bos_taurus	tRNA-Phe-GAA-2-6	chr29	37782344	37782417	+	22	-21.9	87.9	0.123589041	4	0.01164295	0.204290092	0.1112	0	48	inactive	-0.76374907	True
Bos_taurus	tRNA-Phe-GAA-3-1	chrX	132029727	132029800	+	22	-24.4	87.6	-0.09609589	9	0.029754204	0.406976744	-0.0581	6	23	active	0.669812106	True
Bos_taurus	tRNA-Phe-GAA-4-1	chr15	83314391	83314464	+	22	-17.9	69.5	0.013493151	4	0.027166882	0.275851198	-0.11755	0	24	inactive	-0.654994423	True
Bos_taurus	tRNA-Phe-GAA-5-1	chr1	95195159	95195232	+	22	-17.7	72.6	-0.115931507	9	0.006468305	0.143207856	-0.20415	1	18	inactive	-0.886900339	True
Bos_taurus	tRNA-Phe-GAA-6-1	chr23	49828350	49828423	-	22	-19.4	72.1	-0.090479452	9	0.031047865	0.40902553	-0.62715	0	3	inactive	-0.559307241	True
Bos_taurus	tRNA-Phe-GAA-7-1	chr18	23943601	23943674	+	22	-17.4	72.3	-0.057986301	325	0.010349288	0.062233286	0.0434	0	30	inactive	-0.945594452	True
Bos_taurus	tRNA-Phe-GAA-8-1	chr13	17128536	17128609	+	22	-20.3	62.9	0.006452055	12	0.029754204	0.611620795	-0.67405	0	24	active	0.638180941	True
Bos_taurus	tRNA-Phe-GAA-9-1	chrX	132036503	132036581	+	22	-21.8	58.2	-0.083820513	233	0.019280206	0.414341282	-0.25815	5	24	inactive	-0.63352476	True
Bos_taurus	tRNA-Pro-AGG-1-1	chr4	93567898	93567970	+	12	-29.5	70.2	1.385194444	2	0.012953368	0.126103405	-1.452	0	91	inactive	-0.583434868	True
Bos_taurus	tRNA-Pro-AGG-1-10	chr25	2623052	2623124	+	12	-29.5	70.2	0.529541667	3	0.080310881	0.95580309	-4.432	15	45	active	0.908636692	True
Bos_taurus	tRNA-Pro-AGG-1-11	chr25	2627826	2627898	+	12	-29.5	70.2	0.524652778	2	0.062176166	0.823917137	-4.054578947	15	48	active	0.914034693	True
Bos_taurus	tRNA-Pro-AGG-1-12	chr25	2630820	2630892	+	12	-29.5	70.2	0.535180556	11	0.033678756	0.396825397	-4.49855	11	48	active	0.907281893	True
Bos_taurus	tRNA-Pro-AGG-1-2	chr10	26514781	26514853	+	12	-29.5	70.2	1.283236111	48	0.053108808	0.777000777	-4.5676	3	17	active	0.969978834	True
Bos_taurus	tRNA-Pro-AGG-1-3	chr10	26517521	26517593	+	12	-29.5	70.2	0.932916667	3	0.029792746	0.887423935	-3.72695	3	17	active	0.986337557	True
Bos_taurus	tRNA-Pro-AGG-1-4	chr15	56432204	56432276	+	12	-29.5	70.2	1.382833333	351	0.059585492	0.866666667	-4.95545	0	14	active	0.872336744	True
Bos_taurus	tRNA-Pro-AGG-1-5	chr23	31311727	31311799	-	12	-29.5	70.2	1.392569444	3	0.019430052	0.607243548	-1.9689	4	47	active	0.955089926	True
Bos_taurus	tRNA-Pro-AGG-1-6	chr25	2596988	2597060	+	12	-29.5	70.2	0.133541667	3	0.03238342	0.353964401	-0.98285	6	39	active	0.869578699	True
Bos_taurus	tRNA-Pro-AGG-1-7	chr25	2600905	2600977	-	12	-29.5	70.2	0.217041667	3	0.064766839	0.566801619	-1.56845	8	40	active	0.911074884	True
Bos_taurus	tRNA-Pro-AGG-1-8	chr25	2617868	2617940	+	12	-29.5	70.2	0.535180556	3	0.07642487	0.883095038	-4.071368421	16	42	active	0.912636692	True
Bos_taurus	tRNA-Pro-AGG-1-9	chr25	2620735	2620807	+	12	-29.5	70.2	0.529541667	3	0.071243523	0.953840913	-4.1958	15	45	active	0.910034693	True
Bos_taurus	tRNA-Pro-CGG-1-1	chr3	1051358	1051430	-	4	-29.5	70.2	1.170069444	3	0.07642487	0.824196041	-0.9093	0	9	active	0.971973968	True
Bos_taurus	tRNA-Pro-CGG-1-2	chr19	28461074	28461146	-	4	-29.5	70.2	1.407611111	10	0.053108808	0.645280236	-2.96635	6	117	active	0.984464112	True
Bos_taurus	tRNA-Pro-CGG-1-3	chr23	31138814	31138886	-	4	-29.5	70.2	0.680458333	6	0.029792746	0.10951189	-2.54725	2	21	active	0.927204074	True
Bos_taurus	tRNA-Pro-CGG-1-4	chr25	2610090	2610162	+	4	-29.5	70.2	0.374305556	27	0.049222798	0.455729167	-1.5357	10	43	active	0.911534868	True
Bos_taurus	tRNA-Pro-TGG-1-1	chr10	26499192	26499264	-	8	-29.5	74.9	0.344305556	10	0.033678756	0.378436824	-3.5144	2	20	active	0.963068651	True
Bos_taurus	tRNA-Pro-TGG-2-1	chr10	26446038	26446110	-	8	-29.5	70.3	1.43225	6	0.045336788	0.514075887	-3.6336	2	16	active	0.98839059	True
Bos_taurus	tRNA-Pro-TGG-2-2	chr25	2594063	2594135	+	8	-29.5	70.3	0.839166667	4	0.075129534	0.645624103	-5.02145	7	41	active	0.987953809	True
Bos_taurus	tRNA-Pro-TGG-2-3	chr25	2617012	2617084	+	8	-29.5	70.3	0.134722222	5	0.075129534	0.436191426	-1.459526316	15	40	active	0.898924986	True
Bos_taurus	tRNA-Pro-TGG-2-4	chr25	2619613	2619685	+	8	-29.5	70.3	0.132319444	4	0.049222798	0.565558633	-1.4052	15	44	active	0.907047827	True
Bos_taurus	tRNA-Pro-TGG-2-5	chr25	2622196	2622268	+	8	-29.5	70.3	0.134722222	4	0.073834197	0.60206422	-1.2424	16	45	active	0.887382966	True
Bos_taurus	tRNA-Pro-TGG-2-6	chr25	2625089	2625161	+	8	-29.5	70.3	0.529541667	3	0.059585492	0.630144033	-2.8431	15	47	active	0.917977231	True
Bos_taurus	tRNA-Pro-TGG-2-7	chr25	2626484	2626556	+	8	-29.5	70.3	0.134722222	5	0.059585492	0.712074303	-1.3481	16	48	active	0.887152239	True
Bos_taurus	tRNA-SeC-TCA-1-1	chr18	53510970	53511057	-	9	-37.1	146.9	1.417287356	12	0.038119441	0.978494624	-4.7154	0	70	active	0.98284845	True
Bos_taurus	tRNA-Ser-ACT-1-1	chr12	18185807	18185880	-	1	-16.1	52.2	0.031383562	132	0.015523933	0.348883573	0.0622	0	25	inactive	-0.863354308	True
Bos_taurus	tRNA-Ser-AGA-1-1	chr19	49814791	49814873	-	12	-32.8	90.3	0.124	351	0.028132992	0.256081946	-0.3855	0	23	active	0.581282789	True
Bos_taurus	tRNA-Ser-AGA-1-2	chr23	30889990	30890072	+	12	-32.8	90.3	0.799695122	213	0.02685422	0.449458815	-3.149	5	7	active	0.869361647	True
Bos_taurus	tRNA-Ser-AGA-2-1	chr14	71396253	71396335	+	12	-32.8	89.6	1.419304878	11	0.065217391	0.830827663	-0.74335	0	10	active	0.97358636	True
Bos_taurus	tRNA-Ser-AGA-2-2	chr19	28464916	28464998	-	12	-32.8	89.6	1.367682927	6	0.049872123	0.77978424	-4.99735	6	119	active	0.987623752	True
Bos_taurus	tRNA-Ser-AGA-2-3	chr23	30879010	30879092	+	12	-32.8	89.6	0.695646341	7	0.037084399	0.355742704	-1.64595	3	2	active	0.926633531	True
Bos_taurus	tRNA-Ser-AGA-2-4	chr23	30895484	30895566	-	12	-32.8	89.6	0.822804878	40	0.010230179	0	-3.7277	4	8	active	0.601797515	True
Bos_taurus	tRNA-Ser-AGA-2-5	chr23	30899984	30900066	-	12	-32.8	89.6	0.79895122	175	0.035805627	0.791529605	-3.746684211	8	10	active	0.818468476	True
Bos_taurus	tRNA-Ser-AGA-2-6	chr23	30941236	30941318	-	12	-32.8	89.6	0.527	10	0.037084399	0.455465587	-2.3262	3	14	active	0.9830205	True
Bos_taurus	tRNA-Ser-AGA-2-7	chr23	30953174	30953256	-	12	-32.8	89.6	0.691134146	65	0.031969309	0.384615385	-2.97935	1	14	active	0.922210227	True
Bos_taurus	tRNA-Ser-AGA-2-8	chr23	31438771	31438853	-	12	-32.8	89.6	0.938609756	6	0.023017903	0.232095491	-2.47945	8	46	active	0.842289865	True
Bos_taurus	tRNA-Ser-AGA-3-1	chr23	30944725	30944807	-	12	-32.8	89	0.647597561	13	0.028132992	0.388403385	-1.6332	4	14	active	0.934844316	True
Bos_taurus	tRNA-Ser-AGA-4-1	chr18	35509928	35510010	+	12	-31.9	83.6	0.060646341	73	0.015345269	0.211736237	-0.3999	0	133	inactive	-0.667140988	True
Bos_taurus	tRNA-Ser-CGA-1-1	chr19	28389026	28389108	-	5	-34	95.1	1.527634146	7	0.038363171	0.6740682	-0.8274	2	103	active	0.986022546	True
Bos_taurus	tRNA-Ser-CGA-2-1	chr23	31087476	31087558	-	5	-34	94	0.624280488	39	0.034526854	0.483902824	-1.7533	3	19	active	0.971133655	True
Bos_taurus	tRNA-Ser-CGA-3-1	chr5	57464638	57464720	-	5	-29.8	89.6	1.578341463	5	0.042199488	0.489253888	-0.71655	0	160	active	0.981849256	True
Bos_taurus	tRNA-Ser-CGA-4-1	chr23	30817790	30817872	+	5	-34	94.1	0.664	6	0.025575448	0.383351588	-1.53045	6	20	active	0.946410686	True
Bos_taurus	tRNA-Ser-CGA-5-1	chr23	28678315	28678397	+	5	-17.8	64.3	0.026695122	173	0.008951407	0.08291874	-0.07265	0	62	inactive	-0.911656435	True
Bos_taurus	tRNA-Ser-GCT-1-1	chr23	30052390	30052472	+	17	-32.8	91.9	0.871085366	130	0.014066496	0.237341772	-1.6519	4	12	active	0.514886799	True
Bos_taurus	tRNA-Ser-GCT-2-1	chr29	45045824	45045906	+	17	-30.7	89.1	1.621317073	6	0.05370844	0.74537037	-2.67365	0	65	active	0.987443543	True
Bos_taurus	tRNA-Ser-GCT-3-1	chr10	36292322	36292404	-	17	-30.7	88.4	1.546719512	8	0.047314578	0.828598485	-1.19325	0	38	active	0.985228633	True
Bos_taurus	tRNA-Ser-GCT-3-2	chr19	28442023	28442105	+	17	-30.7	88.4	1.567987805	27	0.079283887	0.957264957	-3.9787	3	113	active	0.986710608	True
Bos_taurus	tRNA-Ser-GCT-3-3	chr23	30229758	30229840	-	17	-30.7	88.4	0.864439024	31	0.037084399	0.68627451	-1.863842105	0	40	active	0.981225031	True
Bos_taurus	tRNA-Ser-GCT-3-6	chr23	30922542	30922624	+	17	-30.7	88.4	0.104365854	111	0.024296675	0.540123457	-0.2996	10	12	active	0.734898764	True
Bos_taurus	tRNA-Ser-GCT-3-7	chr23	30925028	30925110	-	17	-30.7	88.4	0.079719512	27	0.025575448	0.540123457	-0.29765	8	12	active	0.716180199	True
Bos_taurus	tRNA-Ser-GCT-3-9	chr23	31451240	31451322	+	17	-30.7	88.4	1.368487805	34	0.029411765	0.125448029	-4.3789	9	39	active	0.852148942	True
Bos_taurus	tRNA-Ser-GCT-4-1	chr23	31147418	31147500	-	17	-30.1	91.7	0.629402439	9	0.035805627	0.614035088	-2.53855	2	12	active	0.985652659	True
Bos_taurus	tRNA-Ser-GCT-5-1	chr23	31131603	31131685	-	17	-30.1	91	0.638926829	8	0.037084399	0.765306122	-2.60855	1	20	active	0.986110034	True
Bos_taurus	tRNA-Ser-GCT-6-1	chr13	78762056	78762138	-	17	-28.1	84.9	0.101158537	55	0.04859335	0.67394095	-0.4675	0	26	active	0.899049923	True
Bos_taurus	tRNA-Ser-GCT-7-1	chr10	68137246	68137328	+	17	-30.7	84.1	0.104280488	28	0.02173913	0.196078431	-0.1675	0	18	active	0.584138147	True
Bos_taurus	tRNA-Ser-GCT-8-1	chr11	49898895	49898986	+	17	-21	54.2	0.019626374	351	0.007585335	0	-0.27745	0	3	inactive	-0.924138052	True
Bos_taurus	tRNA-Ser-GCT-9-1	chr20	55346943	55347026	-	17	-20.9	52.1	-0.082674699	124	0.022988506	0.446200918	-0.11725	0	6	inactive	-0.726287783	True
Bos_taurus	tRNA-Ser-GGA-1-1	chrX	14775795	14775877	+	15	-34.7	84.6	1.462963415	11	0.040920716	0.41322314	-0.777210526	0	3	active	0.918592583	True
Bos_taurus	tRNA-Ser-GGA-1-2	chrX	14857987	14858069	-	15	-34.7	84.6	1.457231707	11	0.040920716	0.419520548	-0.6393	0	3	active	0.872980381	True
Bos_taurus	tRNA-Ser-GGA-10-1	chr14	23060817	23060890	+	15	-15.3	59.6	0.013808219	141	0.014230272	0.194931774	-0.151	0	9	inactive	-0.928276764	True
Bos_taurus	tRNA-Ser-GGA-11-1	chr10	65659012	65659085	-	15	-13.9	58.1	?	182	0.019404916	0.373931624	-0.009083333	0	10	inactive	-0.692672149	True
Bos_taurus	tRNA-Ser-GGA-12-1	chr6	17196003	17196075	+	15	-18.3	62	0	167	0.00388601	0.137958218	-0.02645	0	3	inactive	-0.92251597	True
Bos_taurus	tRNA-Ser-GGA-2-1	chr1	105213671	105213744	+	15	-12.4	62.9	-0.02239726	132	0.007761966	0.073839662	0.0436	0	2	inactive	-0.91260292	True
Bos_taurus	tRNA-Ser-GGA-3-1	chr9	34936050	34936123	+	15	-13.9	63.2	0	239	0.012936611	0.284938942	-0.0216	0	21	inactive	-0.925012943	True
Bos_taurus	tRNA-Ser-GGA-3-2	chr11	70777895	70777968	+	15	-13.9	63.2	0	132	0.006468305	0.054721701	-0.1368	0	34	inactive	-0.940999005	True
Bos_taurus	tRNA-Ser-GGA-3-3	chr14	63577270	63577343	+	15	-13.9	63.2	0	351	0.009055627	0.091455448	0.028	0	18	inactive	-0.939982663	True
Bos_taurus	tRNA-Ser-GGA-4-1	chrX	94399998	94400070	-	15	-21.2	67.6	-0.089507692	214	0.007772021	0.140056022	-0.930684211	0	3	inactive	-0.919003321	True
Bos_taurus	tRNA-Ser-GGA-5-1	chr11	26300431	26300504	-	15	-13.9	62.2	?	351	0.010349288	0	?	0	25	inactive	-0.90855603	True
Bos_taurus	tRNA-Ser-GGA-6-1	chr2	105433776	105433848	+	15	-16.6	67.9	?	160	0.011658031	0.131975867	?	0	7	inactive	-0.894334203	True
Bos_taurus	tRNA-Ser-GGA-7-1	chr4	97863965	97864037	-	15	-20	65.8	?	198	0.009067358	0.220959596	-0.014153846	0	7	inactive	-0.934451333	True
Bos_taurus	tRNA-Ser-GGA-8-1	chr12	85926603	85926676	+	15	-13.9	59.3	?	351	0.009055627	0.404040404	?	0	0	inactive	-0.702806504	True
Bos_taurus	tRNA-Ser-GGA-9-1	chr21	58044558	58044630	-	15	-19.5	64.6	-0.025569444	275	0.010362694	0.335249042	-0.07595	0	26	inactive	-0.933731611	True
Bos_taurus	tRNA-Ser-TGA-1-1	chr23	30936699	30936781	+	4	-32.8	90.4	0.119414634	1	0.030690537	0.67865327	-2.6322	4	14	active	0.979036735	True
Bos_taurus	tRNA-Ser-TGA-2-1	chr23	31447801	31447883	+	4	-32.2	86.8	1.342646341	7	0.02173913	0.36505867	-3.507	11	41	active	0.891845745	True
Bos_taurus	tRNA-Ser-TGA-3-1	chr28	24365063	24365145	+	4	-34.9	94	1.525890244	19	0.044757033	0.79588015	-2.596	0	9	active	0.979415136	True
Bos_taurus	tRNA-Ser-TGA-4-1	chr23	30886855	30886937	-	4	-30.6	85	0.429731707	1	0.037084399	0.561167228	-3.2633	5	7	active	0.979156072	True
Bos_taurus	tRNA-Sup-CTA-1-1	chr6	18684079	18684151	-	5	-18.3	63	-0.077388889	227	0.012953368	0.254360465	0.1058	0	8	inactive	-0.905396917	True
Bos_taurus	tRNA-Sup-CTA-2-1	chr2	129011458	129011531	-	5	-21.1	60.9	0.057958904	351	0.014230272	0.218886804	-0.4117	0	18	inactive	-0.910402168	True
Bos_taurus	tRNA-Sup-CTA-3-1	chr8	61202158	61202229	-	5	-27.1	57	0.050478873	160	0.005188067	0.413711584	-0.13875	0	21	inactive	-0.684378641	True
Bos_taurus	tRNA-Sup-CTA-4-1	chr12	55658771	55658844	-	5	-19.4	54.8	-0.088958904	224	0.002587322	0.144032922	-0.04215	0	6	inactive	-0.943591522	True
Bos_taurus	tRNA-Sup-CTA-5-1	chr22	6078425	6078498	-	5	-28.9	53.5	0.05339726	202	0.005174644	0.069444444	0.1151	0	5	inactive	-0.773224008	True
Bos_taurus	tRNA-Sup-TCA-1-1	chr6	68630190	68630263	+	9	-29.4	66.6	-0.012684932	351	0.005174644	0.11697861	-0.1702	0	7	inactive	-0.810951852	True
Bos_taurus	tRNA-Sup-TCA-2-1	chr2	136013142	136013215	+	9	-24.5	65.5	-0.013424658	281	0.014230272	0.489282386	0.1187	0	16	inactive	-0.640625729	True
Bos_taurus	tRNA-Sup-TCA-3-1	chr10	54450520	54450592	-	9	-19.5	64.6	?	327	0.011658031	0.179487179	-1.423333333	0	14	inactive	-0.824019958	True
Bos_taurus	tRNA-Sup-TCA-4-1	chr18	35784358	35784431	+	9	-19.1	61.1	0.045315068	50	0.007761966	0.115074799	0.0922	0	74	inactive	-0.884106844	True
Bos_taurus	tRNA-Sup-TCA-5-1	chr13	23758011	23758084	+	9	-15.3	60.7	-0.06309589	351	0.015523933	0.204022151	-0.17635	0	28	inactive	-0.938079247	True
Bos_taurus	tRNA-Sup-TCA-6-1	chr21	56042923	56042993	-	9	-24.3	58.4	0.101071429	351	0.005194805	0.068159688	0.04285	0	59	inactive	-0.893706042	True
Bos_taurus	tRNA-Sup-TCA-7-1	chr11	104768364	104768435	+	9	-23.3	55	0.052901408	351	0.023346304	0.318603112	-0.54095	0	5	inactive	-0.74596791	True
Bos_taurus	tRNA-Sup-TCA-8-1	chr23	16666185	16666258	+	9	-24.7	53	0.027876712	35	0.023285899	0.166666667	-0.3547	0	113	inactive	-0.735271225	True
Bos_taurus	tRNA-Sup-TTA-1-1	chr14	50696151	50696222	+	2	-22.7	59.4	0.072408451	2	0.006485084	0.209371884	0.12385	0	0	inactive	-0.810909048	True
Bos_taurus	tRNA-Sup-TTA-2-1	chr9	83558710	83558783	+	2	-20.5	54.8	-0.101273973	155	0.001293661	0	-0.10775	0	0	inactive	-0.909193035	True
Bos_taurus	tRNA-Thr-AGT-1-1	chr23	29989146	29989220	-	12	-27	83.9	-0.157945946	36	0.023255814	0.907407407	-2.1284	4	11	active	0.866964857	True
Bos_taurus	tRNA-Thr-AGT-2-1	chr18	43765457	43765531	+	12	-27.3	82.6	1.552148649	21	0.063307494	0.795655469	-1.4794	0	24	active	0.98494779	True
Bos_taurus	tRNA-Thr-AGT-2-2	chr19	28442326	28442400	+	12	-27.3	82.6	0.669337838	16	0.055555556	0.91995221	-4.19605	3	113	active	0.987727138	True
Bos_taurus	tRNA-Thr-AGT-2-3	chr19	28464558	28464632	-	12	-27.3	82.6	1.315459459	22	0.0374677	0.826446281	-3.35	6	119	active	0.988465521	True
Bos_taurus	tRNA-Thr-AGT-3-1	chr23	30788237	30788311	-	12	-27.9	85.1	0.102081081	72	0.027131783	0.698341439	-0.47695	4	32	active	0.854054686	True
Bos_taurus	tRNA-Thr-AGT-4-1	chr23	30811605	30811679	+	12	-27	81.4	0.555337838	24	0.014211886	0.355113636	-2.934	7	22	active	0.647580901	True
Bos_taurus	tRNA-Thr-AGT-4-2	chr23	31335303	31335377	+	12	-27	81.4	1.525608108	7	0.031007752	0.556123028	-3.7631	3	51	active	0.988291316	True
Bos_taurus	tRNA-Thr-AGT-5-1	chr19	28389540	28389614	-	12	-27.3	80.1	1.275648649	161	0.032299742	0.293342912	-4.16405	1	101	active	0.849090937	True
Bos_taurus	tRNA-Thr-AGT-6-1	chr23	31100707	31100781	-	12	-27.8	80.6	1.389567568	11	0.018087855	0.600137174	-1.56615	3	19	active	0.901382041	True
Bos_taurus	tRNA-Thr-AGT-8-1	chr3	98543992	98544066	-	12	-24.7	77.2	0.031689189	198	0.010335917	0.249287749	-0.21595	0	21	inactive	-0.874512431	True
Bos_taurus	tRNA-Thr-CGT-1-1	chr1	95174818	95174892	+	5	-24	80	0.816851351	4	0.011627907	0.271791885	-3.26385	3	18	active	0.606498174	True
Bos_taurus	tRNA-Thr-CGT-2-1	chr23	30039696	30039770	+	5	-25.8	77.1	0.989716216	5	0.028423773	0.81043532	-3.14215	4	6	active	0.97551538	True
Bos_taurus	tRNA-Thr-CGT-3-1	chr25	13311911	13311983	+	5	-27	79.6	1.521875	33	0.102331606	1.060606061	-0.1092	0	27	active	0.944883507	True
Bos_taurus	tRNA-Thr-CGT-4-1	chr19	18834350	18834422	-	5	-27.3	78.3	1.100722222	77	0.113989637	0.951086957	0.609642857	0	25	active	0.918613687	True
Bos_taurus	tRNA-Thr-CGT-5-1	chr23	30842030	30842103	-	5	-28.4	77.2	0.653191781	11	0.02457956	0.576184379	-1.7258	2	12	active	0.961891904	True
Bos_taurus	tRNA-Thr-TGT-1-1	chr1	95186768	95186842	+	7	-26	83.6	0.257297297	5	0.027131783	0.775561887	-0.4811	3	17	active	0.903911109	True
Bos_taurus	tRNA-Thr-TGT-2-1	chr1	95112546	95112620	+	7	-24	82.9	0.171297297	1	0.019379845	0.381263617	-1.00155	2	14	active	0.709503531	True
Bos_taurus	tRNA-Thr-TGT-3-1	chr16	26708031	26708104	+	7	-29.1	84.1	0.454575342	17	0.042690815	0.638020833	-3.1541	0	23	active	0.986489629	True
Bos_taurus	tRNA-Thr-TGT-4-1	chr7	41715047	41715120	-	7	-29.7	78.8	1.460082192	8	0.063389392	0.755879059	-3.83925	1	40	active	0.988007484	True
Bos_taurus	tRNA-Thr-TGT-4-2	chr10	26500811	26500884	+	7	-29.7	78.8	0.320753425	43	0.029754204	0.641666667	-3.35635	2	19	active	0.966964708	True
Bos_taurus	tRNA-Thr-TGT-4-3	chr10	26514371	26514444	+	7	-29.7	78.8	1.281383562	9	0.038809832	0.409288339	-3.44185	4	17	active	0.980640189	True
Bos_taurus	tRNA-Thr-TGT-5-1	chr10	26448907	26448980	-	7	-30.4	78	1.389821918	20	0.02457956	0.349800114	-4.6811	2	16	active	0.959903357	True
Bos_taurus	tRNA-Trp-CCA-1-1	chr19	28441517	28441589	+	39	-25.1	73.3	1.523791667	8	0.082901554	0.655136268	-1.88365	3	113	active	0.952531823	True
Bos_taurus	tRNA-Trp-CCA-1-2	chr23	31435199	31435271	+	39	-25.1	73.3	1.251597222	4	0.029792746	0.588482556	-2.664	5	49	active	0.926297772	True
Bos_taurus	tRNA-Trp-CCA-1-3	chr23	31443962	31444034	+	39	-25.1	73.3	0.793291667	2	0.024611399	0.652680653	-2.632	11	41	active	0.845470923	True
Bos_taurus	tRNA-Trp-CCA-1-4	chr25	37482801	37482873	-	39	-25.1	73.3	0.440597015	6	0.029792746	0.387436004	-1.8224	0	67	active	0.713913362	True
Bos_taurus	tRNA-Trp-CCA-10-1	chr15	13476592	13476664	+	39	-18.9	62.3	0	172	0.005181347	0.097222222	-0.0503	0	0	inactive	-0.921021048	True
Bos_taurus	tRNA-Trp-CCA-11-1	chrX	70077682	70077754	-	39	-19.5	63.5	-0.009625	190	0.011658031	0.215570338	-0.3801	0	0	inactive	-0.938418903	True
Bos_taurus	tRNA-Trp-CCA-12-1	chr13	35645854	35645927	+	39	-23.3	58.5	-0.829058824	267	0.007761966	0.127087872	-1.38795	0	20	inactive	-0.889949977	True
Bos_taurus	tRNA-Trp-CCA-13-1	chr19	40463455	40463527	+	39	-21.5	63.7	0	211	0.007772021	0	0	0	30	inactive	-0.957654225	True
Bos_taurus	tRNA-Trp-CCA-14-1	chr17	36081082	36081154	-	39	-21.3	68.3	-0.001152778	351	0.010362694	0.13897161	0.01455	0	28	inactive	-0.967945999	True
Bos_taurus	tRNA-Trp-CCA-15-1	chr3	59153659	59153731	+	39	-19.7	67.8	0	300	0.009067358	0.120523416	-0.2238	0	35	inactive	-0.950699823	True
Bos_taurus	tRNA-Trp-CCA-16-1	chr17	47197854	47197927	+	39	-15	57.9	0.123726027	104	0.01164295	0.248638409	-0.52075	0	14	inactive	-0.906460738	True
Bos_taurus	tRNA-Trp-CCA-17-1	chr3	90311132	90311205	+	39	-16.8	67.3	0.101876712	326	0.010349288	0	-0.09125	0	4	inactive	-0.909967588	True
Bos_taurus	tRNA-Trp-CCA-18-1	chr5	89119347	89119419	-	39	-22.7	64	0.029527778	351	0.011658031	0.075757576	-0.1365	0	51	inactive	-0.944002669	True
Bos_taurus	tRNA-Trp-CCA-19-1	chr10	82753097	82753170	+	39	-16.7	57.7	0.008232877	168	0.012936611	0.348883573	-0.18365	0	12	inactive	-0.909709102	True
Bos_taurus	tRNA-Trp-CCA-2-1	chr19	34632349	34632421	-	39	-25.1	75.1	1.214402778	7	0.089378238	1.012882748	-2.2774	0	51	active	0.934043246	True
Bos_taurus	tRNA-Trp-CCA-20-1	chr29	28855894	28855966	+	39	-23.6	52.3	0.079791667	87	0.005181347	0.087456272	0.2373	0	47	inactive	-0.890923881	True
Bos_taurus	tRNA-Trp-CCA-21-1	chrX	63783020	63783093	-	39	-19.7	61.1	-0.044041096	86	0.002587322	0	0.10315	2	5	inactive	-0.938677967	True
Bos_taurus	tRNA-Trp-CCA-21-2	chrX	63792707	63792780	-	39	-19.7	61.1	-0.025835616	86	0.003880983	0.203252033	0	3	5	inactive	-0.918814035	True
Bos_taurus	tRNA-Trp-CCA-22-1	chr14	12003869	12003942	-	39	-20.3	50	0.058178082	117	0.009055627	0.116666667	-0.0348	0	0	inactive	-0.887233805	True
Bos_taurus	tRNA-Trp-CCA-23-1	chr17	69051469	69051542	-	39	-26.2	55.4	-0.00230137	47	0.016817594	0.069348128	-0.2284	0	0	inactive	-0.899793721	True
Bos_taurus	tRNA-Trp-CCA-24-1	chr13	55686602	55686675	-	39	-17	60.4	0.052657534	100	0.003880983	0.182101977	0.04735	0	26	inactive	-0.951046349	True
Bos_taurus	tRNA-Trp-CCA-25-1	chrX	63791470	63791543	-	39	-18.7	57.3	?	89	0.002587322	0.214987715	?	3	5	inactive	-0.901446067	True
Bos_taurus	tRNA-Trp-CCA-26-1	chrX	63797424	63797497	-	39	-18.7	58.4	?	86	0.007761966	0.098204265	0.3148	2	5	inactive	-0.90681855	True
Bos_taurus	tRNA-Trp-CCA-27-1	chrX	59802167	59802240	-	39	-15.3	62.9	0.080136986	132	0.01164295	0.128205128	-0.4285	0	13	inactive	-0.92303319	True
Bos_taurus	tRNA-Trp-CCA-28-1	chr13	36308942	36309015	+	39	-24.5	54.9	0.057808219	351	0.01164295	0.422705314	0.0175	0	9	inactive	-0.756411697	True
Bos_taurus	tRNA-Trp-CCA-29-1	chr3	92984962	92985035	-	39	-21.1	51.6	0.009219178	55	0.006468305	0.109717868	-0.37195	0	41	inactive	-0.9014416	True
Bos_taurus	tRNA-Trp-CCA-3-1	chr19	33715427	33715499	+	39	-26	77.9	0.369069444	10	0.046632124	0.662739323	-0.8109	0	29	active	0.905444194	True
Bos_taurus	tRNA-Trp-CCA-30-1	chr17	66720093	66720166	+	39	-20.4	53.9	-0.156109589	351	0.01164295	0.175967823	-0.04605	0	13	inactive	-0.948691514	True
Bos_taurus	tRNA-Trp-CCA-31-1	chr12	55467539	55467612	-	39	-13.9	63.2	-0.05069863	140	0.010349288	0.131381381	-0.07505	0	0	inactive	-0.918117965	True
Bos_taurus	tRNA-Trp-CCA-32-1	chr28	23558065	23558138	-	39	-14.6	62.8	?	137	0.003880983	0.071399429	?	0	3	inactive	-0.907505862	True
Bos_taurus	tRNA-Trp-CCA-33-1	chr24	28890581	28890654	-	39	-14.6	62.2	0.052479452	78	0.010349288	0.108932462	-0.0661	0	0	inactive	-0.910572897	True
Bos_taurus	tRNA-Trp-CCA-34-1	chr22	46224491	46224563	+	39	-23.2	54.4	0.057083333	351	0.007772021	0.144687888	-0.06055	0	6	inactive	-0.941879128	True
Bos_taurus	tRNA-Trp-CCA-35-1	chr6	24455742	24455815	-	39	-12.2	60.4	?	351	0.01164295	0.26119403	-0.06475	0	0	inactive	-0.882356555	True
Bos_taurus	tRNA-Trp-CCA-4-1	chr19	28459217	28459289	-	39	-24.5	73.4	1.079513889	8	0.042746114	0.931633511	-3.86135	6	117	active	0.929171758	True
Bos_taurus	tRNA-Trp-CCA-5-1	chr1	106602472	106602544	-	39	-18.7	56.1	0.004402778	6	0.007772021	0.080738178	-0.0913	0	0	inactive	-0.907364859	True
Bos_taurus	tRNA-Trp-CCA-6-1	chr23	15877035	15877108	+	39	-27	57.5	0.047739726	113	0.018111255	0.611735331	-0.24355	0	40	inactive	-0.505001098	True
Bos_taurus	tRNA-Trp-CCA-7-1	chr5	114592460	114592533	+	39	-19.3	55.6	0.052726027	74	0.005174644	0.096418733	-0.0817	0	47	inactive	-0.927105991	True
Bos_taurus	tRNA-Trp-CCA-8-1	chr11	99008678	99008751	-	39	-20.2	59.4	0.080164384	351	0.02457956	0.424242424	0.1159	0	74	inactive	-0.607939361	True
Bos_taurus	tRNA-Trp-CCA-9-1	chr27	6921152	6921224	-	39	-20	64.4	?	351	0.012953368	0.206185567	-0.8414	0	4	inactive	-0.93635334	True
Bos_taurus	tRNA-Tyr-GTA-1-1	chr1	98350086	98350176	-	16	-30.2	77.9	0.079767123	7	0.011392405	0.188577586	-0.03755	0	46	inactive	-0.754158205	True
Bos_taurus	tRNA-Tyr-GTA-1-2	chr23	31292651	31292741	-	16	-25.7	77.9	0.316410959	7	0.029113924	0.556144068	-0.75305	3	33	active	0.957179227	True
Bos_taurus	tRNA-Tyr-GTA-1-3	chr23	31293059	31293149	-	16	-28.1	77.9	0.664739726	6	0.020253165	0.567567568	-2.2199	3	33	active	0.962297317	True
Bos_taurus	tRNA-Tyr-GTA-1-4	chr23	31300292	31300384	-	16	-31.3	77.9	1.494164384	7	0.032828283	0.649350649	-3.5556	3	37	active	0.988995603	True
Bos_taurus	tRNA-Tyr-GTA-2-1	chr11	72574187	72574276	-	16	-30	77.9	1.597616438	12	0.046894804	0.60708091	-3.6412	1	81	active	0.988007484	True
Bos_taurus	tRNA-Tyr-GTA-3-1	chr14	32153521	32153615	+	16	-29.2	74.9	0.819260274	11	0.059193955	0.804597701	-3.06265	2	19	active	0.986721123	True
Bos_taurus	tRNA-Tyr-GTA-4-1	chr10	26447246	26447336	-	16	-28.2	75.4	0.890287671	11	0.034177215	0.520123839	-3.9049	2	16	active	0.987605551	True
Bos_taurus	tRNA-Tyr-GTA-4-2	chr10	26478144	26478235	+	16	-28.6	75.4	0.17960274	15	0.022756005	0.266768293	-0.27025	5	18	active	0.744030476	True
Bos_taurus	tRNA-Tyr-GTA-4-3	chr10	26479991	26480081	+	16	-28.6	75.4	0.111780822	14	0.049367089	0.654069767	-0.80145	4	16	active	0.979252937	True
Bos_taurus	tRNA-Tyr-GTA-4-4	chr14	32154105	32154194	+	16	-31	75.5	1.194808219	11	0.063371356	0.90309633	-3.78365	2	19	active	0.987880119	True
Bos_taurus	tRNA-Tyr-GTA-4-5	chr21	45384155	45384245	-	16	-27.1	75.4	0.123958904	12	0.089873418	0.860837829	0.045	0	19	active	0.936048275	True
Bos_taurus	tRNA-Tyr-GTA-4-6	chr21	45403531	45403621	+	16	-27.7	75.4	0.123890411	12	0.056962025	0.947555693	0.04485	1	18	active	0.934014967	True
Bos_taurus	tRNA-Tyr-GTA-4-7	chr21	45409903	45409993	+	16	-27.1	75.4	0.123890411	12	0.064556962	0.607638889	0.04485	1	18	active	0.93434153	True
Bos_taurus	tRNA-Tyr-GTA-5-1	chr10	26474707	26474797	+	16	-31.9	72.6	0.111972603	14	0.025316456	0.359015272	-0.93985	5	18	active	0.843459461	True
Bos_taurus	tRNA-Tyr-GTA-6-1	chr20	33009751	33009840	+	16	-28.9	72.9	0.101630137	6	0.010139417	0.21875	-0.19925	0	1	inactive	-0.762709876	True
Bos_taurus	tRNA-Tyr-GTA-7-1	chr10	26475376	26475466	+	16	-27.1	74	0.07969863	13	0.007594937	0.139906729	-0.11755	5	18	inactive	-0.779626737	True
Bos_taurus	tRNA-Und-NNN-1-1	chr17	49411599	49411672	+	11	-16.5	56.6	0	217	0.012936611	0.224646983	0.0435	0	13	inactive	-0.955736494	True
Bos_taurus	tRNA-Und-NNN-10-1	chr16	58848652	58848725	-	11	-22.5	51.1	0.002917808	46	0.001293661	0.154661953	-0.01475	0	13	inactive	-0.894372496	True
Bos_taurus	tRNA-Und-NNN-11-1	chr18	53110968	53111042	-	11	-16.9	50.1	0.010378378	160	0.023255814	0.250286041	0.12235	0	70	inactive	-0.829252078	True
Bos_taurus	tRNA-Und-NNN-2-1	chr16	70047861	70047935	-	11	-23.7	55.7	0.078567568	296	0.002583979	0	-0.09995	0	7	inactive	-0.908602327	True
Bos_taurus	tRNA-Und-NNN-3-1	chr2	120297752	120297823	+	11	-19.1	55.5	0.078830986	83	0.015564202	0.08079409	0.0844	0	21	inactive	-0.898425197	True
Bos_taurus	tRNA-Und-NNN-4-1	chr16	79316425	79316498	-	11	-20.7	55.4	0.058178082	73	0.01164295	0.283324339	-0.4538	0	3	inactive	-0.840010966	True
Bos_taurus	tRNA-Und-NNN-5-1	chr19	26261917	26261990	-	11	-17.1	54.4	0.030726027	351	0.012936611	0.17875383	0.12355	0	13	inactive	-0.942461476	True
Bos_taurus	tRNA-Und-NNN-6-1	chr21	21032070	21032143	-	11	-17.1	54.4	0.064547945	99	0.010349288	0.336107554	-0.4962	0	14	inactive	-0.838719519	True
Bos_taurus	tRNA-Und-NNN-7-1	chrX	57207073	57207149	+	11	-17.2	52.4	0.078776316	158	0.005154639	0.087983912	-0.126	0	33	inactive	-0.924927045	True
Bos_taurus	tRNA-Und-NNN-8-1	chr4	12050935	12051008	-	11	-16.5	52.1	0.023452055	186	0.009055627	0.416171225	0.1229	0	4	inactive	-0.816151996	True
Bos_taurus	tRNA-Und-NNN-9-1	chr3	17348102	17348173	+	11	-25.2	51.3	0	172	0.009079118	0.171232877	-0.0448	0	8	inactive	-0.891387282	True
Bos_taurus	tRNA-Val-AAC-1-1	chr1	98394711	98394784	-	17	-24.7	79.4	1.51309589	11	0.031047865	0.481283422	-6.0936	0	41	active	0.987092633	True
Bos_taurus	tRNA-Val-AAC-1-2	chr3	21163118	21163191	+	17	-24.7	79.4	0	19	0.041397154	0.60137457	0	0	8	active	0.720958379	True
Bos_taurus	tRNA-Val-AAC-1-3	chr3	21243504	21243577	-	17	-24.7	79.4	0	7	0.042690815	0.601503759	0	3	5	active	0.756702927	True
Bos_taurus	tRNA-Val-AAC-1-4	chr3	21295878	21295951	+	17	-24.7	79.4	0.022123288	19	0.025873221	0.128676471	-0.59755	1	0	inactive	-0.591492431	True
Bos_taurus	tRNA-Val-AAC-1-5	chr3	21372011	21372084	+	17	-24.7	79.4	-0.03360274	7	0.040103493	0.496345587	-1.64825	2	0	active	0.923036637	True
Bos_taurus	tRNA-Val-AAC-1-6	chr7	41744163	41744236	-	17	-24.7	79.4	0.640191781	15	0.032341527	0.516917293	-3.85795	4	37	active	0.988020914	True
Bos_taurus	tRNA-Val-AAC-1-7	chr23	30816068	30816141	+	17	-24.7	79.4	0.416424658	18	0.043984476	0.400366049	-3.04675	7	22	active	0.97251975	True
Bos_taurus	tRNA-Val-AAC-10-1	chr23	31175099	31175172	+	17	-11.6	58.8	-0.469534247	94	0.005174644	0.18115942	-2.26235	5	11	inactive	-0.806990227	True
Bos_taurus	tRNA-Val-AAC-2-1	chr3	21014869	21014942	+	17	-22.5	77.1	0	20	0.029754204	0.48951049	0	0	10	active	0.657151933	True
Bos_taurus	tRNA-Val-AAC-3-1	chr23	30785669	30785742	-	17	-23	76.5	0.071520548	5	0.029754204	0.641319285	-0.2547	5	32	active	0.757555396	True
Bos_taurus	tRNA-Val-AAC-4-1	chr4	108016747	108016820	-	17	-23.4	79.6	0.101616438	19	0.010349288	0	-0.19415	0	9	inactive	-0.795925457	True
Bos_taurus	tRNA-Val-AAC-5-1	chr23	31190962	31191035	+	17	-24.8	78.6	-0.466082192	10	0.023285899	0.166666667	-2.02945	6	10	active	0.703011704	True
Bos_taurus	tRNA-Val-AAC-6-1	chr3	21057218	21057291	-	17	-20.9	73.3	0	20	0.027166882	0.413711584	0	5	6	active	0.510644113	True
Bos_taurus	tRNA-Val-AAC-7-1	chr3	21130035	21130108	+	17	-16.4	70.2	-0.012465753	19	0.014230272	0.153609831	-0.01285	1	7	inactive	-0.928097324	True
Bos_taurus	tRNA-Val-AAC-8-1	chr3	21261653	21261726	-	17	-23.1	66.6	0	19	0.033635188	0.515463918	0	4	5	active	0.702604568	True
Bos_taurus	tRNA-Val-CAC-1-1	chr3	21029528	21029601	+	27	-24.9	79.3	0.065876712	13	0.06080207	0.546875	-0.49935	4	10	active	0.797427806	True
Bos_taurus	tRNA-Val-CAC-1-2	chr3	21226581	21226654	-	27	-24.9	79.3	0.057835616	3	0.058214748	0.564516129	-0.15625	5	5	active	0.794707434	True
Bos_taurus	tRNA-Val-CAC-1-3	chr3	21316062	21316135	-	27	-24.9	79.3	0.094273973	13	0.042690815	0.495189587	-0.3161	6	0	active	0.875338882	True
Bos_taurus	tRNA-Val-CAC-10-1	chr7	19217464	19217537	-	27	-25.6	57.6	-0.080835616	351	0.014230272	0.215871711	-0.18695	0	86	inactive	-0.940181695	True
Bos_taurus	tRNA-Val-CAC-11-1	chr25	37009864	37009937	-	27	-18.8	61.7	0.02790411	91	0.012936611	0.203488372	-0.41805	0	43	inactive	-0.930354427	True
Bos_taurus	tRNA-Val-CAC-12-1	chr1	16299906	16299978	+	27	-13.3	57.7	0.012208333	29	0.007772021	0.262172285	-0.2379	0	0	inactive	-0.877358869	True
Bos_taurus	tRNA-Val-CAC-13-1	chrX	147170476	147170549	+	27	-22	63.4	0.006808219	252	0.002587322	0.141414141	-0.1507	0	0	inactive	-0.930035343	True
Bos_taurus	tRNA-Val-CAC-14-1	chr16	69952019	69952092	+	27	-15.8	55.9	-0.113150685	127	0.003880983	0	0.03845	0	7	inactive	-0.926663553	True
Bos_taurus	tRNA-Val-CAC-15-1	chr18	46197550	46197622	-	27	-22.9	60.3	0.096291667	99	0.018134715	0.274971942	0.0198	0	62	inactive	-0.58643417	True
Bos_taurus	tRNA-Val-CAC-2-1	chr3	8152756	8152829	+	27	-24.7	79.4	1.068493151	13	0.051746442	0.603667393	-1.4613	0	15	active	0.977382708	True
Bos_taurus	tRNA-Val-CAC-2-2	chr3	21004526	21004599	+	27	-24.7	79.4	0.093305556	13	0.058214748	0.505093379	-0.6008	2	10	active	0.880147953	True
Bos_taurus	tRNA-Val-CAC-2-3	chr3	21444909	21444982	-	27	-24.7	79.4	0.17469863	9	0.063389392	0.685736677	-3.6406	5	24	active	0.985861454	True
Bos_taurus	tRNA-Val-CAC-2-4	chr7	41749128	41749201	-	27	-24.7	79.4	1.38490411	2	0.053040103	0.794461469	-3.05115	2	38	active	0.988241645	True
Bos_taurus	tRNA-Val-CAC-2-5	chr23	31092996	31093069	-	27	-24.7	79.4	0.056493151	0	0.03622251	0.335634829	-0.5786	4	19	active	0.572143238	True
Bos_taurus	tRNA-Val-CAC-2-6	chr23	31330737	31330810	-	27	-24.7	79.4	1.329273973	4	0.068564036	0.606469003	-3.90265	3	50	active	0.988754702	True
Bos_taurus	tRNA-Val-CAC-3-1	chr3	21209248	21209321	+	27	-24.2	79	0.109287671	13	0.063389392	0.55239899	-3.311	4	5	active	0.970281496	True
Bos_taurus	tRNA-Val-CAC-3-4	chr23	30912159	30912232	+	27	-24.2	79	0.184780822	22	0.063389392	0.748462978	-0.7421	14	10	active	0.84807811	True
Bos_taurus	tRNA-Val-CAC-4-1	chr3	21369307	21369380	+	27	-22.7	78.2	-0.042446154	9	0.032341527	0.412848199	-0.7036	2	0	active	0.700803254	True
Bos_taurus	tRNA-Val-CAC-5-1	chr3	21066853	21066926	-	27	-20.6	74.2	0.093819444	2	0.06080207	0.616631431	-0.49715	4	3	active	0.792956997	True
Bos_taurus	tRNA-Val-CAC-6-1	chr3	21177497	21177570	+	27	-22.4	71.4	0.079917808	3	0.064683053	0.630114566	-0.31865	4	8	active	0.858782659	True
Bos_taurus	tRNA-Val-CAC-7-1	chr3	21048256	21048329	+	27	-15.1	67.2	0.101835616	19	0.016817594	0.136363636	-0.4831	2	6	inactive	-0.81543325	True
Bos_taurus	tRNA-Val-CAC-8-1	chr3	21072741	21072814	-	27	-9.8	62.4	0.204465753	101	0.046571798	0.562381853	-3.52	3	3	active	0.809939851	True
Bos_taurus	tRNA-Val-CAC-9-1	chr2	130212810	130212883	-	27	-27	65.8	0.075493151	223	0.009055627	0.072239422	0.0389	0	5	inactive	-0.862977368	True
Bos_taurus	tRNA-Val-GAC-1-1	chrX	132039150	132039225	+	1	-19.6	60.8	-0.23148	9	0.023225806	0.327452553	-0.6358	5	24	inactive	-0.607062082	True
Bos_taurus	tRNA-Val-TAC-1-1	chr3	20994280	20994353	+	13	-24.7	79.4	0.137328767	122	0.064683053	0.758522964	-3.23765	2	10	active	0.927794311	True
Bos_taurus	tRNA-Val-TAC-1-2	chr3	21025809	21025882	+	13	-24.7	79.4	0.129657534	90	0.043984476	0.547983054	-3.1938	4	10	active	0.961132036	True
Bos_taurus	tRNA-Val-TAC-10-1	chr17	61049982	61050054	-	13	-24.8	67.7	-0.039041667	117	0.007772021	0.364583333	0.03785	0	17	inactive	-0.861469009	True
Bos_taurus	tRNA-Val-TAC-11-1	chr20	62526176	62526249	+	13	-11.4	53.6	-0.023684932	171	0.007761966	0.172839506	0.1244	0	1	inactive	-0.937381847	True
Bos_taurus	tRNA-Val-TAC-12-1	chr5	26880482	26880555	+	13	-15.5	51.5	0.042191781	43	0.002587322	0.106691053	-0.0614	0	79	inactive	-0.87781657	True
Bos_taurus	tRNA-Val-TAC-2-1	chr3	21251187	21251260	-	13	-17.8	72.1	-0.041657534	90	0.043984476	0.583333333	-0.6996	5	5	active	0.679444497	True
Bos_taurus	tRNA-Val-TAC-3-1	chrX	132024378	132024451	+	13	-22.9	80.4	1.199794521	12	0.093143596	1.124415888	-5.37845	3	23	active	0.981289718	True
Bos_taurus	tRNA-Val-TAC-4-1	chr15	84095407	84095480	-	13	-23.6	80.5	1.13669863	19	0.115135834	0.904593118	-3.0313	5	30	active	0.979063324	True
Bos_taurus	tRNA-Val-TAC-5-1	chr23	31009219	31009292	+	13	-27.1	76	-0.066442857	15	0.053040103	0.859284145	0.12365	0	27	active	0.759942511	True
Bos_taurus	tRNA-Val-TAC-6-1	chr23	31105499	31105572	+	13	-26.1	82.3	0.464246575	16	0.014230272	0.171947924	-1.70095	2	19	inactive	-0.612775211	True
Bos_taurus	tRNA-Val-TAC-7-1	chr3	21230095	21230168	-	13	-17.2	55.1	0.20909589	90	0.03622251	0.484809308	-3.4028	5	5	active	0.648507158	True
Bos_taurus	tRNA-Val-TAC-8-1	chr9	40730548	40730620	-	13	-9	52.4	-0.140097222	299	0.010362694	0.076252723	0.1229	0	2	inactive	-0.912768837	True
Bos_taurus	tRNA-Val-TAC-9-1	chr11	63649673	63649746	-	13	-25.3	70.7	0.053972603	286	0.025873221	0.526315789	-0.21125	0	10	active	0.548282144	True
Canis_lupus_familiaris	tRNA-Ala-AGC-1-1	chr6	25378673	25378745	-	13	-27	83.6	0.180986111	29	0.006476684	0	-0.43885	0	7	inactive	-0.71817662	True
Canis_lupus_familiaris	tRNA-Ala-AGC-1-2	chr35	25761989	25762061	-	13	-27	83.6	0.808944444	1	0.056994819	1.022063595	-3.784	0	5	active	0.96856367	True
Canis_lupus_familiaris	tRNA-Ala-AGC-10-1	chr1	78766732	78766804	+	13	-20.6	57	-0.366375	0	0.002590674	0	-0.33915	0	1	inactive	-0.842427561	True
Canis_lupus_familiaris	tRNA-Ala-AGC-2-1	chr35	25802828	25802900	-	13	-29	84.4	0.098180556	22	0.018134715	0.171568627	-0.641882353	1	2	active	0.51618216	True
Canis_lupus_familiaris	tRNA-Ala-AGC-3-1	chr35	25733009	25733081	+	13	-29.9	80.3	?	4	0.028497409	0.422654269	?	2	10	active	0.965572493	True
Canis_lupus_familiaris	tRNA-Ala-AGC-4-1	chr35	25860182	25860254	-	13	-31.9	84.7	0.97575	1	0.079015544	0.801649107	-3.1432	1	18	active	0.98382389	True
Canis_lupus_familiaris	tRNA-Ala-AGC-4-2	chr35	25870742	25870814	-	13	-31.9	84.7	1.076069444	1	0.090673575	0.781202871	-2.9289	1	20	active	0.98457103	True
Canis_lupus_familiaris	tRNA-Ala-AGC-5-1	chr35	24443249	24443322	-	13	-28.1	59.6	0.268547945	2	0.054333765	0.910442215	-1.663	2	25	active	0.979306083	True
Canis_lupus_familiaris	tRNA-Ala-AGC-6-1	chr17	21046702	21046775	+	13	-32	59.7	1.64130137	6	0.067270375	0.853658537	-2.3599	1	98	active	0.98044282	True
Canis_lupus_familiaris	tRNA-Ala-AGC-6-2	chr29	15777179	15777252	+	13	-32	59.7	1.686684932	10	0.053040103	0.962545836	-1.1533	3	22	active	0.974721873	True
Canis_lupus_familiaris	tRNA-Ala-AGC-7-1	chr35	24341107	24341180	-	13	-29.6	58.9	1.122575342	1	0.046571798	0.777777778	-2.5061	2	31	active	0.968942247	True
Canis_lupus_familiaris	tRNA-Ala-AGC-8-1	chr18	49432967	49433040	+	13	-27.7	54.6	0.846986301	8	0.07373868	0.901639344	-1.70025	0	25	active	0.754625145	True
Canis_lupus_familiaris	tRNA-Ala-AGC-9-1	chr35	24427619	24427692	-	13	-27.2	53.7	0.281671233	2	0.014230272	0.228937729	-1.6754	2	27	inactive	-0.661831373	True
Canis_lupus_familiaris	tRNA-Ala-CGC-1-1	chr35	24320137	24320209	+	4	-26.5	79.7	1.471361111	5	0.018134715	0.199771689	-3.97885	3	34	active	0.805539389	True
Canis_lupus_familiaris	tRNA-Ala-CGC-2-1	chr35	25778047	25778119	-	4	-26.5	78.7	1.112861111	6	0.045336788	0.751633987	-2.0006	0	3	active	0.97127177	True
Canis_lupus_familiaris	tRNA-Ala-CGC-3-1	chr36	2608838	2608910	+	4	-27.6	74.4	1.71525	15	0.085492228	2.349537037	-2.41905	1	24	active	0.979728634	True
Canis_lupus_familiaris	tRNA-Ala-CGC-4-1	chr35	25793383	25793455	-	4	-26.4	77.3	0.372861111	7	0.016839378	0.306096952	-5.138368421	1	3	active	0.631056772	True
Canis_lupus_familiaris	tRNA-Ala-TGC-1-1	chr11	404507	404579	+	11	-26.5	79.7	1.414805556	17	0.050518135	0.632911392	-3.93215	3	33	active	0.988989434	True
Canis_lupus_familiaris	tRNA-Ala-TGC-1-2	chr26	5001251	5001323	+	11	-26.5	79.7	1.407388889	5	0.011658031	0.183823529	-2.8767	4	49	active	0.522716897	True
Canis_lupus_familiaris	tRNA-Ala-TGC-2-1	chr26	4996184	4996256	-	11	-26.5	78.7	0.785361111	1	0.03626943	0.73493083	-2.7838	4	47	active	0.987820798	True
Canis_lupus_familiaris	tRNA-Ala-TGC-2-2	chr35	25740769	25740841	+	11	-26.5	78.7	0.147347222	44	0.006476684	0.189393939	-2.02655	2	7	inactive	-0.662640464	True
Canis_lupus_familiaris	tRNA-Ala-TGC-3-1	chr25	15408767	15408839	+	11	-26.4	78.5	0	285	0.015544041	0.172583826	0.0058	0	11	inactive	-0.900854808	True
Canis_lupus_familiaris	tRNA-Ala-TGC-4-1	chr35	25821688	25821760	+	11	-31.7	77.1	0.331666667	16	0.007772021	0.241268382	-0.88265	3	4	inactive	-0.636516775	True
Canis_lupus_familiaris	tRNA-Ala-TGC-4-2	chr35	25847029	25847101	-	11	-31.7	77.1	0.350986111	16	0.019430052	0.163246269	-0.94875	1	11	active	0.63633669	True
Canis_lupus_familiaris	tRNA-Ala-TGC-5-1	chr1	5696581	5696653	+	11	-25.3	78.7	-0.027375	4	0.006476684	0.225225225	-1.6415	0	5	inactive	-0.713761946	True
Canis_lupus_familiaris	tRNA-Ala-TGC-6-1	chr35	25736493	25736564	-	11	-18.3	56.8	0.490704225	93	0.033722438	0.866336634	-2.4866	2	8	active	0.814759186	True
Canis_lupus_familiaris	tRNA-Ala-TGC-7-1	chr35	25852160	25852232	-	11	-15.5	51.6	0.286541667	12	0.005181347	0.063131313	-0.4609	2	16	inactive	-0.829305354	True
Canis_lupus_familiaris	tRNA-Ala-TGC-8-1	chr6	50435197	50435270	-	11	-19.9	57.8	0.007123288	93	0.003880983	0.164165103	-0.1768	0	0	inactive	-0.89966919	True
Canis_lupus_familiaris	tRNA-Arg-ACG-1-1	chr8	3257811	3257884	+	6	-25.4	67.6	1.628547945	56	0.054333765	0.964092474	-3.0531	0	94	active	0.955104298	True
Canis_lupus_familiaris	tRNA-Arg-ACG-1-2	chr35	24301842	24301915	+	6	-25.4	67.6	1.333246575	15	0.103492885	1.060238878	-1.612	3	32	active	0.979305136	True
Canis_lupus_familiaris	tRNA-Arg-ACG-2-1	chr29	15775915	15775988	-	6	-23.7	64.6	0.782178082	2	0.098318241	0.910865322	-2.11875	3	22	active	0.983548886	True
Canis_lupus_familiaris	tRNA-Arg-ACG-3-1	chr35	24450475	24450548	-	6	-25.4	68.8	0.317041096	13	0.015523933	0.213512277	-1.6035	2	25	inactive	-0.650007483	True
Canis_lupus_familiaris	tRNA-Arg-ACG-4-1	chr20	42791712	42791785	+	6	-23.1	64.2	1.555205479	8	0.130659767	1.192214112	-3.1792	0	34	active	0.939875117	True
Canis_lupus_familiaris	tRNA-Arg-ACG-5-1	chr35	24935197	24935270	-	6	-22.9	63	0.700068493	9	0.015523933	0.107725454	-2.78365	4	26	inactive	-0.589199083	True
Canis_lupus_familiaris	tRNA-Arg-CCG-1-1	chr6	38064172	38064245	-	3	-27.1	67	1.389205479	12	0.106080207	0.862676056	-4.8937	1	52	active	0.925783554	True
Canis_lupus_familiaris	tRNA-Arg-CCG-1-2	chr35	25879028	25879101	+	3	-27.1	67	0.454561644	3	0.091849935	0.842035217	-1.10395	1	20	active	0.906058761	True
Canis_lupus_familiaris	tRNA-Arg-CCG-2-1	chr9	12559906	12559979	+	3	-29	64.9	1.706479452	12	0.09702458	1.063132817	0.3402	0	37	active	0.891628718	True
Canis_lupus_familiaris	tRNA-Arg-CCT-1-1	chr9	5445716	5445789	+	12	-32.1	71.1	0.857150685	27	0.087968952	1.123595506	?	2	71	active	0.978378528	True
Canis_lupus_familiaris	tRNA-Arg-CCT-10-1	chr18	50619450	50619523	-	12	-17.6	50.3	-0.241630137	351	0.006468305	0.256081946	-0.3159	0	61	inactive	-0.905034373	True
Canis_lupus_familiaris	tRNA-Arg-CCT-11-1	chr30	30708763	30708836	-	12	-17.6	60.5	0.042027397	128	0.002587322	0.052410901	0.1276	0	47	inactive	-0.931502529	True
Canis_lupus_familiaris	tRNA-Arg-CCT-2-1	chr6	38018289	38018362	-	12	-32.1	72.3	0.82509589	35	0.03622251	0.711864407	-2.02165	4	53	active	0.981149828	True
Canis_lupus_familiaris	tRNA-Arg-CCT-2-2	chr9	5446063	5446136	-	12	-32.1	72.3	1.324356164	8	0.09702458	1.033386328	-3.05645	2	71	active	0.985556962	True
Canis_lupus_familiaris	tRNA-Arg-CCT-3-1	chr6	38062681	38062754	-	12	-30.6	71.7	0.958684932	12	0.041397154	0.764563107	-2.73175	2	53	active	0.987616013	True
Canis_lupus_familiaris	tRNA-Arg-CCT-4-1	chr9	5444635	5444708	-	12	-30.2	67.5	1.072273973	23	0.041397154	0.770825236	-0.3246	2	71	active	0.949260345	True
Canis_lupus_familiaris	tRNA-Arg-CCT-5-1	chr16	9418799	9418872	-	12	-27.2	65.6	1.680178082	6	0.068564036	1.141773938	-1.08465	0	39	active	0.980279086	True
Canis_lupus_familiaris	tRNA-Arg-CCT-6-1	chr6	38031034	38031107	+	12	-33.6	73.6	0.449123288	11	0.072445019	0.80905279	-0.748	6	47	active	0.9707506	True
Canis_lupus_familiaris	tRNA-Arg-CCT-7-1	chrX	87319839	87319912	+	12	-15.8	55	-0.198356164	74	0.007761966	0.142857143	-0.40615	0	5	inactive	-0.893343357	True
Canis_lupus_familiaris	tRNA-Arg-CCT-8-1	chrX	12728615	12728688	+	12	-12	56.1	0.070863014	58	0.007761966	0.100430416	-0.24685	0	8	inactive	-0.901053777	True
Canis_lupus_familiaris	tRNA-Arg-CCT-9-1	chr26	23777262	23777335	+	12	-10.7	54.1	-0.019835616	107	0.002587322	0.061403509	-0.3467	0	18	inactive	-0.938464847	True
Canis_lupus_familiaris	tRNA-Arg-TCG-1-1	chr3	52374415	52374488	+	4	-29.2	74.8	1.621342466	19	0.089262613	0.860596954	-3.0822	0	73	active	0.983590768	True
Canis_lupus_familiaris	tRNA-Arg-TCG-2-1	chr35	24217951	24218024	+	4	-23.7	65.5	0.754013699	61	0.028460543	0.14632107	-2.8106	5	37	active	0.851674136	True
Canis_lupus_familiaris	tRNA-Arg-TCG-3-1	chr35	24198780	24198853	+	4	-23.7	64.3	1.140849315	30	0.050452781	0.671416827	-5.25195	2	42	active	0.985310473	True
Canis_lupus_familiaris	tRNA-Arg-TCG-4-1	chr35	25680038	25680111	-	4	-13.9	51	1.105178082	9	0.025873221	0.200228833	-3.0827	0	16	active	0.506436802	True
Canis_lupus_familiaris	tRNA-Arg-TCT-1-1	chr9	55178081	55178172	+	7	-31.4	70.1	0.283465753	2	0.067003793	0.951591512	-2.24315	0	92	active	0.984644542	True
Canis_lupus_familiaris	tRNA-Arg-TCT-1-2	chr18	37205583	37205669	-	7	-30.4	70.3	1.268465753	1	0.103053435	0.927754678	-2.36155	5	27	active	0.98611945	True
Canis_lupus_familiaris	tRNA-Arg-TCT-2-1	chr6	55275212	55275297	-	7	-30.4	71.1	1.649	3	0.133757962	0.950321802	0.82115	0	32	active	0.897282529	True
Canis_lupus_familiaris	tRNA-Arg-TCT-3-1	chr5	32943673	32943760	+	7	-25.6	70.8	1.568136986	1	0.066073698	0.906862745	-0.2697	4	99	active	0.973309131	True
Canis_lupus_familiaris	tRNA-Arg-TCT-4-1	chr38	22823225	22823299	+	7	-27.7	78.5	1.657081081	19	0.065891473	0.679367362	1.54095	0	39	active	0.970231406	True
Canis_lupus_familiaris	tRNA-Arg-TCT-5-1	chr12	58515658	58515731	+	7	-22.6	78.9	-0.007041096	214	0.002587322	0	-0.2336	0	11	inactive	-0.912654468	True
Canis_lupus_familiaris	tRNA-Arg-TCT-6-1	chr4	18744985	18745058	-	7	-24.6	77	?	166	0.001293661	0.07918552	0.317384615	0	1	inactive	-0.842802881	True
Canis_lupus_familiaris	tRNA-Asn-GTT-1-1	chr2	10907753	10907827	+	14	-26.4	80.9	1.47127027	8	0.07622739	0.791407575	-3.23695	0	2	active	0.969290668	True
Canis_lupus_familiaris	tRNA-Asn-GTT-1-2	chr9	23485324	23485398	+	14	-26.4	80.9	1.630391892	6	0.045219638	0.903614458	-1.7134	0	68	active	0.985974585	True
Canis_lupus_familiaris	tRNA-Asn-GTT-1-3	chr17	58835774	58835848	-	14	-26.4	80.9	-0.626714286	10	0.065891473	0.780405405	?	0	24	active	0.932789724	True
Canis_lupus_familiaris	tRNA-Asn-GTT-1-4	chr17	58882867	58882941	+	14	-26.4	80.9	-0.163478873	20	0.04005168	0.68627451	-0.804888889	0	10	active	0.891829742	True
Canis_lupus_familiaris	tRNA-Asn-GTT-1-5	chr20	57449038	57449112	-	14	-26.4	80.9	?	3	0.151162791	0.895140665	?	1	72	active	0.940308854	True
Canis_lupus_familiaris	tRNA-Asn-GTT-1-6	chr35	24361952	24362026	-	14	-26.4	80.9	0.438675676	31	0.050387597	0.693943764	-1.4801	1	29	active	0.980442214	True
Canis_lupus_familiaris	tRNA-Asn-GTT-2-1	chr38	21113461	21113535	+	14	-26.4	81.5	0.247540541	13	0.023255814	0.299145299	-3.19895	8	20	active	0.830262602	True
Canis_lupus_familiaris	tRNA-Asn-GTT-3-1	chr17	58995318	58995392	+	14	-26.4	73.3	0.485310811	8	0.060723514	0.861490266	-1.42615	3	19	active	0.984393544	True
Canis_lupus_familiaris	tRNA-Asn-GTT-4-1	chr17	59066070	59066144	-	14	-27.3	82	0.182405405	14	0.034883721	0.474147663	-0.6718	1	31	active	0.955150344	True
Canis_lupus_familiaris	tRNA-Asn-GTT-5-1	chr17	58897497	58897571	-	14	-28.6	80.7	0.474216216	8	0.081395349	0.791407575	-1.3658	3	12	active	0.975121021	True
Canis_lupus_familiaris	tRNA-Asn-GTT-5-2	chr17	58920113	58920187	+	14	-28.6	80.7	0.485310811	8	0.082687339	0.765349033	-1.32025	3	10	active	0.974761875	True
Canis_lupus_familiaris	tRNA-Asn-GTT-5-3	chr17	58978320	58978394	-	14	-28.6	80.7	0.474216216	8	0.033591731	0.26481715	-1.22265	1	18	active	0.854327165	True
Canis_lupus_familiaris	tRNA-Asn-GTT-6-1	chr8	16403454	16403528	-	14	-21.9	57.3	0.405851351	148	0.025839793	0.565558633	-1.6173125	0	3	active	0.754345649	True
Canis_lupus_familiaris	tRNA-Asn-GTT-7-1	chr17	58988709	58988783	-	14	-20	52.5	0.462689189	180	0.062015504	1.038847665	-1.5485	2	19	active	0.676366762	True
Canis_lupus_familiaris	tRNA-Asp-ATC-1-1	chr16	33673103	33673176	-	1	-10.1	58	0.004342466	281	0.006468305	0.165406427	-0.0174	0	35	inactive	-0.95475303	True
Canis_lupus_familiaris	tRNA-Asp-GTC-1-1	chr15	37922892	37922964	+	11	-26.4	65.4	1.144013889	9	0.079015544	0.778162055	-3.8934	1	29	active	0.986540408	True
Canis_lupus_familiaris	tRNA-Asp-GTC-2-1	chr5	33028676	33028748	-	11	-26.4	66.5	1.465777778	12	0.095854922	0.754618029	-4.67935	6	126	active	0.987361296	True
Canis_lupus_familiaris	tRNA-Asp-GTC-2-2	chr15	35831101	35831173	+	11	-26.4	66.5	1.665583333	16	0.051813472	0.868055556	-2.75245	0	53	active	0.987296858	True
Canis_lupus_familiaris	tRNA-Asp-GTC-2-3	chr26	4996493	4996565	+	11	-26.4	66.5	0.759680556	13	0.04015544	0.588235294	-2.6196	4	47	active	0.98763689	True
Canis_lupus_familiaris	tRNA-Asp-GTC-2-4	chr26	4998772	4998844	+	11	-26.4	66.5	1.583583333	12	0.067357513	0.955703883	-4.60715	4	49	active	0.988662871	True
Canis_lupus_familiaris	tRNA-Asp-GTC-2-5	chr35	24816827	24816899	+	11	-26.4	66.5	0.304875	12	0.075129534	0.789689594	-1.5817	3	14	active	0.982726896	True
Canis_lupus_familiaris	tRNA-Asp-GTC-2-6	chr35	24874681	24874753	-	11	-26.4	66.5	0.016972222	14	0.058290155	0.524737631	-1.35335	3	6	active	0.933000189	True
Canis_lupus_familiaris	tRNA-Asp-GTC-2-7	chr38	21070639	21070711	-	11	-26.4	66.5	0.686694444	13	0.073834197	1.010553564	-3.3294	3	15	active	0.983089338	True
Canis_lupus_familiaris	tRNA-Asp-GTC-2-8	chr38	21090962	21091034	-	11	-26.4	66.5	0	15	0.133419689	0.905656472	0	8	21	active	0.635282837	True
Canis_lupus_familiaris	tRNA-Cys-GCA-1-1	chr9	23208298	23208370	+	19	-26.1	81.9	1.559611111	13	0.042746114	0.374331551	-4.6577	1	70	active	0.904891433	True
Canis_lupus_familiaris	tRNA-Cys-GCA-1-2	chr9	23208984	23209056	+	19	-26.1	81.9	1.664569444	9	0.047927461	0.784167289	-2.02135	1	68	active	0.986700607	True
Canis_lupus_familiaris	tRNA-Cys-GCA-1-3	chr9	23387283	23387355	-	19	-26.1	81.9	1.359972222	15	0.006476684	0	-3.1841	2	46	inactive	-0.588388004	True
Canis_lupus_familiaris	tRNA-Cys-GCA-10-1	chr16	14465849	14465921	-	19	-18.4	64.6	0.402013889	11	0.010362694	0.202546296	-0.88045	4	34	inactive	-0.878231649	True
Canis_lupus_familiaris	tRNA-Cys-GCA-2-1	chr23	29226784	29226856	-	19	-24.6	81.8	1.280736111	8	0.006476684	0.292031706	-1.4135	1	1	inactive	-0.569584835	True
Canis_lupus_familiaris	tRNA-Cys-GCA-3-1	chr9	23385570	23385642	+	19	-23.9	81.8	1.566819444	6	0.050518135	0.755568639	-1.69615	2	46	active	0.987182376	True
Canis_lupus_familiaris	tRNA-Cys-GCA-4-1	chr9	23391139	23391211	+	19	-26.1	77.3	1.032847222	11	0.007772021	0.050316274	-1.3677	2	47	inactive	-0.790653842	True
Canis_lupus_familiaris	tRNA-Cys-GCA-4-2	chr9	23410137	23410209	+	19	-26.1	77.3	1.032902778	10	0.007772021	0.156810036	-3.04685	0	48	inactive	-0.736088367	True
Canis_lupus_familiaris	tRNA-Cys-GCA-4-3	chr16	14329020	14329092	+	19	-26.1	77.3	0.485458333	16	0.023316062	0.446078431	-1.16745	2	34	active	0.924055125	True
Canis_lupus_familiaris	tRNA-Cys-GCA-4-4	chr16	14462511	14462583	+	19	-26.1	77.3	0.343263889	13	0.006476684	0.045207957	-1.65715	3	34	inactive	-0.76913941	True
Canis_lupus_familiaris	tRNA-Cys-GCA-4-5	chr16	14470706	14470778	-	19	-26.1	77.3	0.052222222	103	0.009067358	0.108560794	-1.48655	4	39	inactive	-0.761287455	True
Canis_lupus_familiaris	tRNA-Cys-GCA-5-1	chr16	14330247	14330319	+	19	-24.6	77.2	0.340541667	8	0.005181347	0.160845588	-1.23325	2	35	inactive	-0.861498834	True
Canis_lupus_familiaris	tRNA-Cys-GCA-5-2	chr16	14450055	14450127	+	19	-24.6	77.2	0.422347222	9	0.001295337	0.0625	-1.4347	2	34	inactive	-0.786315962	True
Canis_lupus_familiaris	tRNA-Cys-GCA-5-3	chr16	14481686	14481758	+	19	-24.6	77.2	0.504138889	12	0.00388601	0.057956615	-0.74785	2	57	inactive	-0.871174896	True
Canis_lupus_familiaris	tRNA-Cys-GCA-5-4	chr23	29229338	29229410	-	19	-24.6	77.2	1.336680556	11	0.007772021	0.196998124	-1.0501	1	2	inactive	-0.852843584	True
Canis_lupus_familiaris	tRNA-Cys-GCA-6-1	chr16	14459118	14459190	+	19	-24.6	74	0.767138889	29	0.011658031	0.226244344	-1.0225	4	35	inactive	-0.818999613	True
Canis_lupus_familiaris	tRNA-Cys-GCA-7-1	chr16	14451085	14451157	+	19	-24.6	71.5	0.326722222	351	0.005181347	0.112233446	-2.05305	2	34	inactive	-0.790166266	True
Canis_lupus_familiaris	tRNA-Cys-GCA-8-1	chr16	14474310	14474382	-	19	-26.1	72.8	0.516416667	88	0.042746114	0.57057921	-1.36685	4	43	active	0.948820455	True
Canis_lupus_familiaris	tRNA-Cys-GCA-9-1	chr16	14478181	14478253	-	19	-25.8	64.6	0.433819444	5	0.034974093	0.495867769	-1.7792	3	51	active	0.986300407	True
Canis_lupus_familiaris	tRNA-Gln-CTG-1-1	chr5	32942547	32942619	+	9	-24.7	71.5	1.419416667	4	0.034974093	0.705076551	-5.0493	4	95	active	0.989173342	True
Canis_lupus_familiaris	tRNA-Gln-CTG-1-2	chr30	30200403	30200475	-	9	-24.7	71.5	1.598555556	12	0.063471503	0.793016127	-2.4688	0	25	active	0.987438051	True
Canis_lupus_familiaris	tRNA-Gln-CTG-1-3	chr35	24828108	24828180	+	9	-24.7	71.5	0.577763889	11	0.045336788	0.712239976	-1.4056	2	11	active	0.980291206	True
Canis_lupus_familiaris	tRNA-Gln-CTG-1-4	chr35	25940599	25940671	-	9	-24.7	71.5	1.165555556	4	0.054404145	0.617116506	-3.35105	3	26	active	0.989117004	True
Canis_lupus_familiaris	tRNA-Gln-CTG-2-1	chr17	58855416	58855488	+	9	-24.2	71.1	-0.851638889	25	0.031088083	0.167410714	-0.94845	0	8	active	0.518623726	True
Canis_lupus_familiaris	tRNA-Gln-CTG-4-1	chr17	57585156	57585228	+	9	-24.7	70.9	0.297416667	28	0.107512953	0.875801038	-0.58215	1	45	active	0.943349744	True
Canis_lupus_familiaris	tRNA-Gln-CTG-4-2	chr17	57593322	57593394	-	9	-24.7	70.9	0.278194444	28	0.110103627	0.891017093	-0.45745	1	41	active	0.938875049	True
Canis_lupus_familiaris	tRNA-Gln-CTG-5-1	chr35	24658363	24658435	+	9	-11.6	52.6	0.461375	19	0.024611399	0.508166969	-2.4318	1	27	active	0.559409408	True
Canis_lupus_familiaris	tRNA-Gln-CTG-6-1	chr24	3528881	3528949	+	9	-23.6	51.3	0	230	0.005208333	0.162037037	0.1546	0	8	inactive	-0.912537765	True
Canis_lupus_familiaris	tRNA-Gln-TTG-1-1	chr9	25357308	25357380	+	5	-27.1	72.6	1.640986111	9	0.102331606	0.946201676	0.32985	0	41	active	0.973363353	True
Canis_lupus_familiaris	tRNA-Gln-TTG-2-1	chr35	24210144	24210216	-	5	-22	66.9	0.719680556	7	0.03626943	0.546875	-2.2493	5	35	active	0.982118222	True
Canis_lupus_familiaris	tRNA-Gln-TTG-2-2	chr35	24986544	24986616	-	5	-22	66.9	1.054833333	7	0.010362694	0.179425837	-2.79945	1	39	inactive	-0.663593979	True
Canis_lupus_familiaris	tRNA-Gln-TTG-3-1	chr35	24209613	24209685	-	5	-22	62.4	0.595638889	7	0.024611399	0.682926829	-1.67065	5	34	active	0.970041925	True
Canis_lupus_familiaris	tRNA-Gln-TTG-4-1	chrX	13471329	13471424	-	5	-15.1	56.1	0.074712329	27	0.018867925	0.411522634	-0.07955	0	6	inactive	-0.645128874	True
Canis_lupus_familiaris	tRNA-Glu-CTC-1-1	chr1	64654674	64654746	-	12	-26.4	73.2	1.212777778	7	0.077720207	0.969529086	-3.6352	0	17	active	0.986095232	True
Canis_lupus_familiaris	tRNA-Glu-CTC-1-2	chr16	13772758	13772830	+	12	-26.4	73.2	1.001875	6	0.063471503	0.768542615	-3.82065	1	46	active	0.987594512	True
Canis_lupus_familiaris	tRNA-Glu-CTC-1-3	chr17	58821760	58821832	+	12	-26.4	73.2	1.376833333	5	0.031088083	0.622222222	-3.77155	3	31	active	0.988202191	True
Canis_lupus_familiaris	tRNA-Glu-CTC-2-1	chr6	23302435	23302508	-	12	-12.1	72.9	0	351	0.001293661	0	0.06625	0	50	inactive	-0.931269997	True
Canis_lupus_familiaris	tRNA-Glu-CTC-3-1	chr31	15884689	15884762	+	12	-11.3	61.2	-0.022876712	18	0.005174644	0.149190111	0.09155	0	0	inactive	-0.905576571	True
Canis_lupus_familiaris	tRNA-Glu-CTC-4-1	chr34	4011738	4011811	-	12	-19.3	58.2	-0.120136986	134	0.03622251	0.640060241	-0.1331	0	36	inactive	-0.558390094	True
Canis_lupus_familiaris	tRNA-Glu-CTC-5-1	chr14	22842065	22842138	+	12	-13.5	56.8	-0.066958904	23	0.003880983	0	-0.16745	0	12	inactive	-0.932885973	True
Canis_lupus_familiaris	tRNA-Glu-CTC-6-1	chrX	109567253	109567326	-	12	-15.5	53.2	-0.15409589	129	0.005174644	0.064468595	-0.04505	0	42	inactive	-0.92612985	True
Canis_lupus_familiaris	tRNA-Glu-TTC-1-1	chr38	21119707	21119779	+	10	-26.4	73.2	0.244888889	8	0.037564767	0.278773397	-2.23595	5	19	active	0.911342353	True
Canis_lupus_familiaris	tRNA-Glu-TTC-1-2	chr38	21120344	21120416	-	10	-26.4	73.2	0.134861111	5	0.044041451	0.486631016	-2.46655	4	19	active	0.986063961	True
Canis_lupus_familiaris	tRNA-Glu-TTC-2-1	chr17	58900716	58900788	+	10	-26.4	68.7	0.262166667	5	0.112694301	0.777356446	-0.73425	5	10	active	0.95848323	True
Canis_lupus_familiaris	tRNA-Glu-TTC-2-2	chr17	58916975	58917047	-	10	-26.4	68.7	0.249486111	5	0.107512953	0.737639553	-0.73255	5	10	active	0.955925043	True
Canis_lupus_familiaris	tRNA-Glu-TTC-2-3	chr17	59074065	59074137	+	10	-26.4	68.7	-0.250680556	22	0.051813472	1.127281403	-1.9301	2	36	active	0.9288698	True
Canis_lupus_familiaris	tRNA-Glu-TTC-3-1	chr22	9565991	9566063	+	10	-24.8	70.4	1.586319444	8	0.120466321	1.041036499	-1.29645	0	17	active	0.92832811	True
Canis_lupus_familiaris	tRNA-Glu-TTC-3-2	chr25	19032409	19032481	+	10	-24.8	70.4	0.759847222	10	0.058290155	0.841472577	-2.52355	0	23	active	0.986147257	True
Canis_lupus_familiaris	tRNA-Glu-TTC-4-1	chr3	34576363	34576435	+	10	-24.8	68.9	1.457652778	8	0.066062176	0.926164967	-4.0151	0	6	active	0.976375444	True
Canis_lupus_familiaris	tRNA-Glu-TTC-5-1	chr22	6107147	6107219	+	10	-26.7	71.2	1.690763889	9	0.10492228	1.173541963	-3.97205	0	30	active	0.981248016	True
Canis_lupus_familiaris	tRNA-Glu-TTC-6-1	chr9	41915491	41915564	+	10	-10.3	69.5	0.085876712	351	0.01164295	0.133231823	-0.3018	0	13	inactive	-0.89061624	True
Canis_lupus_familiaris	tRNA-Gly-CCC-1-1	chr17	59080576	59080647	-	6	-26.4	79.3	0.274774648	6	0.028534371	0.20109164	-0.7494375	1	36	active	0.639468851	True
Canis_lupus_familiaris	tRNA-Gly-CCC-3-1	chr6	39931623	39931694	+	6	-31.4	75.1	1.474676056	4	0.114137484	1.023391813	-4.53915	0	168	active	0.978228106	True
Canis_lupus_familiaris	tRNA-Gly-CCC-3-2	chr10	68799173	68799244	-	6	-31.4	75.1	1.32643662	6	0.054474708	0.537909836	-3.57845	0	52	active	0.987315369	True
Canis_lupus_familiaris	tRNA-Gly-CCC-4-1	chr4	61810003	61810076	-	6	-12.9	52.8	-0.088410959	25	0.002587322	0	-0.2559	0	9	inactive	-0.912244223	True
Canis_lupus_familiaris	tRNA-Gly-GCC-1-1	chr5	32948627	32948698	+	11	-26.4	81	1.033549296	12	0.047989624	0.479306147	-3.22185	6	99	active	0.988286574	True
Canis_lupus_familiaris	tRNA-Gly-GCC-1-2	chr5	76281228	76281299	-	11	-26.4	81	1.023901408	9	0.076523995	0.990226337	-4.09345	0	82	active	0.985621479	True
Canis_lupus_familiaris	tRNA-Gly-GCC-1-3	chr5	76718671	76718742	-	11	-26.4	81	0.909704225	12	0.019455253	0.283564815	-0.4321	2	47	active	0.61441663	True
Canis_lupus_familiaris	tRNA-Gly-GCC-1-4	chr5	76726482	76726553	+	11	-26.4	81	1.399816901	9	0.058365759	0.505694374	-0.7817	2	49	active	0.987262359	True
Canis_lupus_familiaris	tRNA-Gly-GCC-1-5	chr5	76727750	76727821	+	11	-26.4	81	1.332619718	11	0.035019455	0.591216216	0.19405	2	49	active	0.929439084	True
Canis_lupus_familiaris	tRNA-Gly-GCC-1-6	chr35	25067172	25067243	-	11	-26.4	81	1.195492958	13	0.058365759	0.712663482	-3.7088	1	27	active	0.988128885	True
Canis_lupus_familiaris	tRNA-Gly-GCC-1-7	chr36	2609179	2609250	-	11	-26.4	81	1.084830986	2	0.118028534	0.938765182	-0.22675	1	24	active	0.934165192	True
Canis_lupus_familiaris	tRNA-Gly-GCC-3-1	chr38	21079533	21079604	+	11	-17.3	62.1	1.189478873	20	0.031128405	28	-2.55015	3	15	active	0.893024048	True
Canis_lupus_familiaris	tRNA-Gly-TCC-1-1	chr5	33028177	33028249	+	10	-25.1	73.8	1.129916667	4	0.07253886	0.719585233	-3.0387	6	124	active	0.98855918	True
Canis_lupus_familiaris	tRNA-Gly-TCC-1-2	chr17	58823830	58823902	+	10	-25.1	73.8	1.362458333	14	0.041450777	0.675438596	-2.51575	3	30	active	0.988549071	True
Canis_lupus_familiaris	tRNA-Gly-TCC-1-3	chr38	21071016	21071088	-	10	-25.1	73.8	1.007166667	3	0.095854922	1.159132307	-2.8052	3	15	active	0.976859853	True
Canis_lupus_familiaris	tRNA-Gly-TCC-2-1	chr19	15617913	15617985	+	10	-25.1	73.8	0	25	0.009067358	0.240798074	-0.70915	0	3	inactive	-0.808883158	True
Canis_lupus_familiaris	tRNA-Gly-TCC-2-2	chr20	55036898	55036970	-	10	-25.1	73.8	0.984819444	14	0.101036269	0.888212156	-3.9925	1	46	active	0.985458526	True
Canis_lupus_familiaris	tRNA-Gly-TCC-3-1	chr27	31865306	31865378	-	10	-24	72.9	0	233	0.005181347	0.265957447	-0.09725	0	34	inactive	-0.895257589	True
Canis_lupus_familiaris	tRNA-His-GTG-1-1	chr17	58824672	58824744	+	8	-25.5	60.1	1.350902778	27	0.077720207	0.900735294	-1.08665	3	30	active	0.983945998	True
Canis_lupus_familiaris	tRNA-His-GTG-1-4	chr17	58994570	58994642	-	8	-25.5	60.1	0.184194444	9	0.049222798	0.943627451	-0.9091	3	19	active	0.976004972	True
Canis_lupus_familiaris	tRNA-His-GTG-1-5	chr30	11615415	11615487	-	8	-25.5	60.1	1.566722222	34	0.067357513	0.760685825	0.50465	2	70	active	0.968730734	True
Canis_lupus_familiaris	tRNA-His-GTG-1-6	chr30	11616978	11617050	-	8	-25.5	60.1	1.672708333	34	0.082901554	0.919976636	-0.1098	2	66	active	0.968106481	True
Canis_lupus_familiaris	tRNA-His-GTG-1-7	chr30	11617685	11617757	+	8	-25.5	60.1	1.553194444	30	0.081606218	0.911458333	0.111	2	65	active	0.964307608	True
Canis_lupus_familiaris	tRNA-His-GTG-1-8	chr35	24565384	24565456	+	8	-25.5	60.1	0.620930556	4	0.042746114	0.918635171	-0.99525	2	26	active	0.979859076	True
Canis_lupus_familiaris	tRNA-Ile-AAT-1-1	chr35	24432875	24432949	+	8	-26.2	84.2	0.236635135	7	0.032299742	0.751817581	-1.11465	2	27	active	0.977348942	True
Canis_lupus_familiaris	tRNA-Ile-AAT-2-1	chr5	33001724	33001798	+	8	-25.5	81.2	1.667027027	12	0.042635659	0.934466019	-5.556	3	125	active	0.988662871	True
Canis_lupus_familiaris	tRNA-Ile-AAT-2-2	chr5	33032730	33032804	-	8	-25.5	81.2	1.371391892	14	0.059431525	0.554265203	-4.1864	6	134	active	0.988759297	True
Canis_lupus_familiaris	tRNA-Ile-AAT-2-3	chr8	70280715	70280789	+	8	-25.5	81.2	1.036891892	14	0.071059432	0.889615105	-3.182	0	33	active	0.987208159	True
Canis_lupus_familiaris	tRNA-Ile-AAT-2-4	chr35	24320738	24320812	+	8	-25.5	81.2	1.437486486	8	0.058139535	0.751173709	-3.4931	3	34	active	0.988989434	True
Canis_lupus_familiaris	tRNA-Ile-AAT-2-5	chr35	24581284	24581358	-	8	-25.5	81.2	0.284445946	8	0.111111111	0.919524336	-0.7529	2	25	active	0.973026255	True
Canis_lupus_familiaris	tRNA-Ile-AAT-3-1	chr35	24933750	24933824	+	8	-25.5	81.2	0.363216216	12	0.0374677	0.532094595	-2.22855	4	25	active	0.986161969	True
Canis_lupus_familiaris	tRNA-Ile-AAT-4-1	chr35	24627986	24628060	+	8	-28.1	77.1	0.051027027	12	0.016795866	0.289975145	-0.59545	0	31	inactive	-0.629316692	True
Canis_lupus_familiaris	tRNA-Ile-TAT-1-1	chr1	113812477	113812570	+	5	-29.6	73.8	1.526121622	4	0.066834805	0.807453416	0.0346	0	134	active	0.972853855	True
Canis_lupus_familiaris	tRNA-Ile-TAT-2-1	chr10	45399190	45399283	+	5	-30.2	73.2	1.480243243	6	0.141235813	1.057140028	0.2822	0	36	active	0.882188898	True
Canis_lupus_familiaris	tRNA-Ile-TAT-2-2	chr35	24457610	24457704	+	5	-33.3	73.1	0.852162162	3	0.069269521	0.695180085	-1.6481	1	24	active	0.982827365	True
Canis_lupus_familiaris	tRNA-Ile-TAT-2-3	chr35	24922108	24922202	+	5	-33.3	73.1	1.046027027	2	0.102015113	1.012536162	-0.82145	0	16	active	0.977356139	True
Canis_lupus_familiaris	tRNA-Ile-TAT-3-1	chr35	25667694	25667786	+	5	-31.7	71.4	-0.039324324	1	0.085858586	0.938405797	-1.00685	0	16	active	0.86734151	True
Canis_lupus_familiaris	tRNA-iMet-CAT-1-1	chr7	43402882	43402954	-	17	-26.1	60.4	1.655902778	14	0.054404145	0.89249286	-3.6092	0	103	active	0.986814273	True
Canis_lupus_familiaris	tRNA-iMet-CAT-1-2	chr35	24195408	24195480	+	17	-26.1	60.4	1.150972222	4	0.045336788	0.911854103	-4.43215	2	43	active	0.98798017	True
Canis_lupus_familiaris	tRNA-iMet-CAT-1-3	chr35	24211744	24211816	-	17	-26.1	60.4	1.114861111	11	0.031088083	0.56492109	-2.88065	5	35	active	0.98659385	True
Canis_lupus_familiaris	tRNA-iMet-CAT-1-4	chr35	24882999	24883071	-	17	-26.1	60.4	0.803277778	7	0.059585492	0.83880703	-2.1425	3	6	active	0.979625804	True
Canis_lupus_familiaris	tRNA-iMet-CAT-2-1	chr35	24845594	24845666	+	17	-26.1	60.2	0.095319444	351	0.046632124	0.321691176	-0.6887	2	9	active	0.580282942	True
Canis_lupus_familiaris	tRNA-iMet-CAT-2-2	chr35	24977368	24977440	+	17	-26.1	60.2	-0.080263889	4	0.047927461	0.708130386	-3.7073	1	36	active	0.906689851	True
Canis_lupus_familiaris	tRNA-iMet-CAT-2-3	chr35	25066744	25066816	-	17	-26.1	60.2	1.278402778	12	0.03238342	0.755813953	-3.83355	1	27	active	0.987262276	True
Canis_lupus_familiaris	tRNA-iMet-CAT-3-1	chr35	24684368	24684441	-	17	-26	53.2	-0.208638889	30	0.027166882	0.817247821	-1.9458	1	36	active	0.61420137	True
Canis_lupus_familiaris	tRNA-Leu-AAG-1-1	chr6	23358707	23358789	-	4	-30.7	74.8	1.66852439	6	0.099744246	1.064814815	-4.5483	0	55	active	0.979144314	True
Canis_lupus_familiaris	tRNA-Leu-AAG-1-2	chr15	17964802	17964884	-	4	-30.7	74.8	0.382926829	8	0.033248082	0.450762829	-1.47175	1	30	active	0.982752731	True
Canis_lupus_familiaris	tRNA-Leu-AAG-1-3	chr35	25944033	25944115	-	4	-30.7	74.8	0.71495122	5	0.078005115	0.814970468	-2.32315	4	27	active	0.983723836	True
Canis_lupus_familiaris	tRNA-Leu-AAG-1-4	chr35	25964303	25964385	+	4	-30.7	74.8	0.325219512	4	0.145780051	1.174496644	-0.32635	0	26	active	0.874762054	True
Canis_lupus_familiaris	tRNA-Leu-CAA-1-1	chr35	25940177	25940282	+	4	-40.4	77.3	0.74397619	5	0.080745342	0.856421186	-2.2275	3	26	active	0.981187228	True
Canis_lupus_familiaris	tRNA-Leu-CAA-2-1	chr35	25897423	25897527	-	4	-40	75.7	1.250797619	5	0.115671642	0.943791946	-2.42495	0	20	active	0.974727987	True
Canis_lupus_familiaris	tRNA-Leu-CAA-3-1	chr35	24891355	24891461	-	4	-43.7	73.6	0.707238095	7	0.068238213	0.804062632	-1.1726	3	7	active	0.970369206	True
Canis_lupus_familiaris	tRNA-Leu-CAA-4-1	chr16	13772417	13772523	+	4	-35.3	73.4	0.909988095	6	0.114143921	0.982004644	-2.0335	1	46	active	0.975256052	True
Canis_lupus_familiaris	tRNA-Leu-CAG-1-1	chr2	59085884	59085967	+	6	-35.7	78.2	1.487457831	7	0.111111111	1.141955499	-4.90055	1	27	active	0.978809864	True
Canis_lupus_familiaris	tRNA-Leu-CAG-1-2	chr35	24294838	24294921	+	6	-35.7	78.2	1.408542169	5	0.051085568	0.789760349	-4.224	3	31	active	0.986683287	True
Canis_lupus_familiaris	tRNA-Leu-CAG-2-1	chr2	59086257	59086340	-	6	-32.8	77.3	1.151783133	9	0.072796935	1.085434174	-2.23275	1	27	active	0.980621525	True
Canis_lupus_familiaris	tRNA-Leu-CAG-2-2	chr38	21071612	21071695	+	6	-32.8	77.3	1.06413253	8	0.058748404	1.137524376	-3.98205	3	15	active	0.982103613	True
Canis_lupus_familiaris	tRNA-Leu-TAA-1-1	chr1	35666270	35666352	+	3	-31	87.3	1.350987805	9	0.140664962	1.216216216	-1.8585	0	27	active	0.850185823	True
Canis_lupus_familiaris	tRNA-Leu-TAA-2-1	chr35	24966794	24966877	-	3	-35.9	90.7	0.669192771	7	0.045977011	0.710702341	-2.3561	0	32	active	0.920885207	True
Canis_lupus_familiaris	tRNA-Leu-TAA-3-1	chr18	37205153	37205236	-	3	-27.9	79.5	0.122361446	5	0.052362708	0.874190564	-3.409	5	27	active	0.934019998	True
Canis_lupus_familiaris	tRNA-Leu-TAG-1-1	chr5	32943095	32943177	-	4	-33.3	75.2	1.654719512	8	0.067774936	0.896	-2.62995	4	95	active	0.986345351	True
Canis_lupus_familiaris	tRNA-Leu-TAG-2-1	chr15	17969760	17969842	-	4	-33.7	74.9	0.078939024	3	0.083120205	0.850202429	-0.83175	1	30	active	0.914052718	True
Canis_lupus_familiaris	tRNA-Leu-TAG-3-1	chr15	17923253	17923335	+	4	-29.7	70.9	0.983695122	8	0.066496164	0.880681818	-2.08195	5	28	active	0.981841167	True
Canis_lupus_familiaris	tRNA-Leu-TAG-4-1	chr6	23444000	23444082	+	4	-30.3	65	1.51104878	18	0.056265985	1.100628931	-3.18865	0	62	active	0.979960285	True
Canis_lupus_familiaris	tRNA-Lys-CTT-1-1	chr6	38021376	38021449	-	38	-28	87.8	-0.7903	5	0.056921087	0.310283688	-0.879	6	51	active	0.660889084	True
Canis_lupus_familiaris	tRNA-Lys-CTT-1-2	chr11	405029	405102	+	38	-28	87.8	1.171917808	9	0.031047865	0.768535262	-2.67835	4	33	active	0.915889154	True
Canis_lupus_familiaris	tRNA-Lys-CTT-1-3	chr11	414332	414405	-	38	-28	87.8	0.273876712	8	0.046571798	0.77	-3.65855	4	33	active	0.934605052	True
Canis_lupus_familiaris	tRNA-Lys-CTT-1-4	chr17	58825638	58825711	+	38	-28	87.8	1.193958904	8	0.055627426	0.823705605	-3.97125	3	30	active	0.943471757	True
Canis_lupus_familiaris	tRNA-Lys-CTT-10-1	chr24	16376157	16376230	+	38	-12.4	55.7	-0.104410959	158	0.003880983	0.051713948	0.0143	0	16	inactive	-0.941345643	True
Canis_lupus_familiaris	tRNA-Lys-CTT-11-1	chr14	40036308	40036381	-	38	-19	64.9	-0.009369863	91	0.007761966	0.23923445	-0.00925	0	13	inactive	-0.948626409	True
Canis_lupus_familiaris	tRNA-Lys-CTT-12-1	chr9	36331779	36331852	+	38	-15.3	64.3	-0.010424658	278	0.01164295	0.307017544	-0.36235	0	63	inactive	-0.930766449	True
Canis_lupus_familiaris	tRNA-Lys-CTT-13-1	chr37	11212486	11212559	+	38	-10.8	60.1	-0.005561644	326	0.006468305	0.273152966	0.00995	0	39	inactive	-0.937671838	True
Canis_lupus_familiaris	tRNA-Lys-CTT-14-1	chr1	118052480	118052553	-	38	-12.4	57	0.012917808	22	0.019404916	0.283975659	-0.12775	0	23	inactive	-0.838831252	True
Canis_lupus_familiaris	tRNA-Lys-CTT-15-1	chr20	46436461	46436534	-	38	-8.6	54.8	-0.024068493	351	0.002587322	0	-0.709444444	0	28	inactive	-0.949936733	True
Canis_lupus_familiaris	tRNA-Lys-CTT-16-1	chr17	25178226	25178299	+	38	-15.4	60.6	0	159	0.003880983	0	0	0	3	inactive	-0.919559699	True
Canis_lupus_familiaris	tRNA-Lys-CTT-17-1	chr33	28187306	28187379	-	38	-22.4	65.3	0.019547945	24	0.018111255	0.14084507	-0.2952	0	16	inactive	-0.818081084	True
Canis_lupus_familiaris	tRNA-Lys-CTT-18-1	chr15	21998121	21998194	-	38	-9.9	55.3	0.065315068	10	0.002587322	0.073313783	-0.25115	0	8	inactive	-0.914293117	True
Canis_lupus_familiaris	tRNA-Lys-CTT-19-1	chr6	55654415	55654488	+	38	-13.7	60.7	0.052589041	351	0.002587322	0.133485889	-0.1713	0	9	inactive	-0.935557092	True
Canis_lupus_familiaris	tRNA-Lys-CTT-2-1	chr6	38045328	38045401	-	38	-25.1	86.3	0.305191781	5	0.046571798	0.750871547	-2.5723	5	50	active	0.940078058	True
Canis_lupus_familiaris	tRNA-Lys-CTT-20-1	chr12	3472827	3472900	+	38	-19.2	57.9	0.035547945	24	0.018111255	0.295822265	-0.00795	0	16	inactive	-0.841555466	True
Canis_lupus_familiaris	tRNA-Lys-CTT-21-1	chr11	45039285	45039358	+	38	-18.5	62.6	0.063890411	22	0.005174644	0.071721311	0.07595	0	16	inactive	-0.936307556	True
Canis_lupus_familiaris	tRNA-Lys-CTT-22-1	chr23	11461347	11461420	-	38	-17.5	71.8	0.069342466	38	0.007761966	0.184339888	0.04155	0	16	inactive	-0.941774771	True
Canis_lupus_familiaris	tRNA-Lys-CTT-23-1	chr32	16988550	16988623	+	38	-15.8	59.8	-0.010808219	49	0.005174644	0.129485757	-0.24845	0	11	inactive	-0.94398708	True
Canis_lupus_familiaris	tRNA-Lys-CTT-24-1	chr9	36091813	36091886	+	38	-16.6	55.4	-0.073589041	351	0.005174644	0.069430669	-0.27885	0	23	inactive	-0.963661903	True
Canis_lupus_familiaris	tRNA-Lys-CTT-25-1	chr27	14596455	14596528	+	38	-13	51.6	-0.057136986	203	0.006468305	0.317028986	0.01135	0	4	inactive	-0.872107514	True
Canis_lupus_familiaris	tRNA-Lys-CTT-26-1	chr12	3621566	3621639	+	38	-12.9	54.7	0.020479452	62	0.01164295	0.072150072	-0.2579	0	9	inactive	-0.934591041	True
Canis_lupus_familiaris	tRNA-Lys-CTT-27-1	chr10	47235601	47235674	+	38	-14.6	57.7	0.013643836	199	0.007761966	0.252403846	-0.42555	0	10	inactive	-0.933359944	True
Canis_lupus_familiaris	tRNA-Lys-CTT-28-1	chr7	7358108	7358181	+	38	-11.8	55.6	-0.026054795	63	0.002587322	0.091264668	-0.4315	0	0	inactive	-0.933030236	True
Canis_lupus_familiaris	tRNA-Lys-CTT-29-1	chr10	16921464	16921537	+	38	-22.7	55.6	-0.087917808	351	0.02457956	0.333333333	-0.0705	0	114	inactive	-0.81309284	True
Canis_lupus_familiaris	tRNA-Lys-CTT-3-1	chr6	38052839	38052912	+	38	-28.6	88.1	0.55139726	4	0.077619664	0.884421006	-3.6187	4	51	active	0.93910392	True
Canis_lupus_familiaris	tRNA-Lys-CTT-30-1	chr37	5370037	5370110	+	38	-19.2	62.6	0.003849315	42	0.006468305	0.079257246	-0.23915	0	5	inactive	-0.932717307	True
Canis_lupus_familiaris	tRNA-Lys-CTT-31-1	chr6	2088794	2088867	+	38	-7.6	50.9	0	181	0	0	-0.1004	0	5	inactive	-0.899169711	True
Canis_lupus_familiaris	tRNA-Lys-CTT-32-1	chr6	20428570	20428643	+	38	-15.9	58.6	-0.206150685	25	0.016817594	0.38961039	-0.42975	0	7	inactive	-0.847692892	True
Canis_lupus_familiaris	tRNA-Lys-CTT-33-1	chr18	53994485	53994558	+	38	-9.5	58.8	-0.129438356	261	0.010349288	0.247568523	0.14105	0	163	inactive	-0.925664757	True
Canis_lupus_familiaris	tRNA-Lys-CTT-34-1	chr33	3297237	3297310	+	38	-14.7	53.2	0.115219178	35	0.009055627	0.373931624	-0.01985	0	1	inactive	-0.846161609	True
Canis_lupus_familiaris	tRNA-Lys-CTT-4-1	chr3	58153640	58153713	-	38	-30.1	88	0.467246575	7	0.063389392	0.82708605	-2.42745	0	55	active	0.936449191	True
Canis_lupus_familiaris	tRNA-Lys-CTT-4-2	chr8	33612481	33612554	-	38	-30.1	88	1.341589041	8	0.029754204	0.418660287	-3.7523	0	51	active	0.847907203	True
Canis_lupus_familiaris	tRNA-Lys-CTT-5-1	chr6	38030088	38030161	-	38	-25.8	84.2	0.253452055	9	0.054333765	0.688729875	-1.6025	6	47	active	0.931795791	True
Canis_lupus_familiaris	tRNA-Lys-CTT-6-1	chr6	38040291	38040364	-	38	-30.5	89.3	0.343958904	6	0.025873221	0.418478261	-1.7916	4	48	active	0.83345192	True
Canis_lupus_familiaris	tRNA-Lys-CTT-7-1	chr9	42263378	42263451	+	38	-15	70	0.117534247	121	0.010349288	0.391236307	-0.196	0	23	inactive	-0.877024829	True
Canis_lupus_familiaris	tRNA-Lys-CTT-8-1	chr20	41691805	41691878	+	38	-14	73.9	0.089616438	9	0.016817594	0.537825059	-0.04525	0	28	inactive	-0.551627226	True
Canis_lupus_familiaris	tRNA-Lys-CTT-9-1	chr26	16756707	16756780	+	38	-17	63.4	-0.047630137	230	0.006468305	0	-0.22715	0	21	inactive	-0.952257308	True
Canis_lupus_familiaris	tRNA-Lys-TTT-1-1	chr5	32941795	32941868	+	10	-27.5	87.8	1.675424658	5	0.064683053	0.884697647	-5.00965	4	95	active	0.988693519	True
Canis_lupus_familiaris	tRNA-Lys-TTT-1-2	chr18	37198785	37198858	+	10	-27.5	87.8	1.311082192	9	0.075032342	1.024590164	-3.97105	6	32	active	0.988279474	True
Canis_lupus_familiaris	tRNA-Lys-TTT-1-3	chr18	37201983	37202056	-	10	-27.5	87.8	0.985767123	7	0.051746442	0.546875	-3.44005	6	30	active	0.987921951	True
Canis_lupus_familiaris	tRNA-Lys-TTT-1-4	chr35	24318049	24318122	-	10	-27.5	87.8	0.628013699	8	0.009055627	0.116666667	-0.43855	3	34	inactive	-0.634915703	True
Canis_lupus_familiaris	tRNA-Lys-TTT-1-5	chr38	1049399	1049472	+	10	-27.5	87.8	0.427394366	8	0.021992238	0.563607085	-3.08655	1	47	active	0.976325456	True
Canis_lupus_familiaris	tRNA-Lys-TTT-1-6	chr38	1049750	1049823	-	10	-27.5	87.8	1.402616438	23	0.021992238	0.521091811	-3.4621	1	47	active	0.979199858	True
Canis_lupus_familiaris	tRNA-Lys-TTT-2-1	chr35	24870595	24870668	+	10	-25.2	84.3	0.292424658	7	0.032341527	0.889967638	-1.34065	1	7	active	0.974969606	True
Canis_lupus_familiaris	tRNA-Lys-TTT-2-2	chr35	24881755	24881828	-	10	-25.2	84.3	0.238506849	11	0.03622251	0.714362445	-1.3697	3	6	active	0.97095477	True
Canis_lupus_familiaris	tRNA-Lys-TTT-3-1	chr35	24690365	24690438	-	10	-28	82.9	0.367643836	69	0.002587322	0	-3.30395	1	35	active	0.553808335	True
Canis_lupus_familiaris	tRNA-Lys-TTT-4-1	chr7	58255337	58255410	+	10	-11.9	57	-0.079972603	75	0.01164295	0.322402358	-0.1404	0	12	inactive	-0.880801791	True
Canis_lupus_familiaris	tRNA-Met-CAT-1-1	chr35	25944671	25944744	+	17	-25.8	76.7	1.176424658	5	0.063389392	0.828402367	-2.06715	4	27	active	0.987563889	True
Canis_lupus_familiaris	tRNA-Met-CAT-2-1	chr13	21547524	21547597	-	17	-25	78	1.019123288	6	0.133247089	1.021985572	-1.93325	0	37	active	0.940511023	True
Canis_lupus_familiaris	tRNA-Met-CAT-3-1	chr35	25951357	25951430	-	17	-25.8	77.4	1.079178082	6	0.04915912	0.964187328	-2.90865	2	27	active	0.988406416	True
Canis_lupus_familiaris	tRNA-Met-CAT-4-1	chr35	24415814	24415887	+	17	-24	81.2	0.455369863	2	0.054333765	0.314253648	-3.0353	0	26	active	0.851834014	True
Canis_lupus_familiaris	tRNA-Met-CAT-5-1	chr16	35836523	35836596	+	17	-26.7	83.3	0.263479452	6	0.007761966	0	-0.7564	0	22	inactive	-0.710532761	True
Canis_lupus_familiaris	tRNA-Met-CAT-6-1	chr13	20079884	20079957	+	17	-23.6	65.7	0.27869863	7	0.014230272	0.594135802	-1.05515	0	0	active	0.607112176	True
Canis_lupus_familiaris	tRNA-Met-CAT-7-1	chr15	35113295	35113368	+	17	-16	56.7	-0.194205479	32	0.003880983	0	-0.3288	0	28	inactive	-0.913303035	True
Canis_lupus_familiaris	tRNA-Met-CAT-8-1	chr14	47375492	47375565	+	17	-17.2	55.7	0	279	0.012936611	0.297787862	-0.20455	0	5	inactive	-0.919939706	True
Canis_lupus_familiaris	tRNA-Met-CAT-9-1	chr7	40189739	40189812	-	17	-17.2	60	-0.164808219	240	0.005174644	0.084663764	-0.28515	0	24	inactive	-0.92791262	True
Canis_lupus_familiaris	tRNA-Phe-GAA-1-1	chr18	37195014	37195087	+	10	-21.9	88.9	0.293534247	4	0.064683053	0.635418386	-3.89945	3	35	active	0.987228144	True
Canis_lupus_familiaris	tRNA-Phe-GAA-1-2	chr18	37200969	37201042	+	10	-21.9	88.9	1.214328767	3	0.078913325	0.457383476	-2.9505	6	31	active	0.986608163	True
Canis_lupus_familiaris	tRNA-Phe-GAA-1-3	chr22	45354610	45354683	-	10	-21.9	88.9	1.118972603	10	0.131953428	0.949957591	-2.1162	0	25	active	0.94040922	True
Canis_lupus_familiaris	tRNA-Phe-GAA-1-4	chr26	4998183	4998256	+	10	-21.9	88.9	1.302506849	10	0.068564036	0.732026144	-2.67525	4	48	active	0.988108731	True
Canis_lupus_familiaris	tRNA-Phe-GAA-2-1	chr25	37618145	37618218	-	10	-20.4	86.1	0.36230137	3	0.010349288	0.184989429	-4.022684211	0	6	active	0.512552588	True
Canis_lupus_familiaris	tRNA-Phe-GAA-3-1	chr37	29978029	29978102	+	10	-20.5	84.9	0.320465753	3	0.012936611	0.287828947	-3.6714	0	11	active	0.571701556	True
Canis_lupus_familiaris	tRNA-Phe-GAA-4-1	chr35	25816216	25816289	+	10	-22	89.3	0.127	10	0.087968952	0.70128569	-0.74295	3	4	active	0.947103269	True
Canis_lupus_familiaris	tRNA-Phe-GAA-4-2	chr35	25816828	25816901	-	10	-22	89.3	0.142109589	10	0.078913325	0.656167979	-0.79635	3	4	active	0.967291107	True
Canis_lupus_familiaris	tRNA-Phe-GAA-5-1	chr20	57449230	57449303	+	10	-21.2	86.7	0.51169863	4	0.12160414	1.060606061	-1.00965	1	71	active	0.869608515	True
Canis_lupus_familiaris	tRNA-Phe-GAA-6-1	chr33	12221386	12221459	+	10	-11.7	68.1	?	7	0.005174644	0.066742944	?	0	4	inactive	-0.711503969	True
Canis_lupus_familiaris	tRNA-Pro-AGG-1-1	chr6	38020810	38020882	-	8	-29.5	70.2	0.538444444	3	0.06865285	0.747863248	-3.97765	5	52	active	0.987796946	True
Canis_lupus_familiaris	tRNA-Pro-AGG-1-2	chr6	38026089	38026161	-	8	-29.5	70.2	0.538444444	3	0.089378238	0.862794613	-3.95215	6	48	active	0.986072382	True
Canis_lupus_familiaris	tRNA-Pro-AGG-1-3	chr6	38045621	38045693	+	8	-29.5	70.2	0.284055556	4	0.069948187	0.735294118	-1.6847	5	50	active	0.985084592	True
Canis_lupus_familiaris	tRNA-Pro-AGG-1-4	chr7	30747721	30747793	+	8	-29.5	70.2	1.539611111	2	0.059585492	0.422297297	-4.10685	1	15	active	0.965673178	True
Canis_lupus_familiaris	tRNA-Pro-AGG-1-5	chr14	7858618	7858690	-	8	-29.5	70.2	1.477486111	3	0.015544041	0.154798762	-1.3551	0	100	inactive	-0.611509962	True
Canis_lupus_familiaris	tRNA-Pro-AGG-1-6	chr15	17916193	17916265	-	8	-29.5	70.2	0.994930556	2	0.097150259	1.024449036	-3.5289	3	29	active	0.986212567	True
Canis_lupus_familiaris	tRNA-Pro-AGG-1-7	chr21	22421064	22421136	-	8	-29.5	70.2	1.515875	3	0.095854922	0.944375259	-4.59635	1	14	active	0.98090206	True
Canis_lupus_familiaris	tRNA-Pro-AGG-1-8	chr35	24321797	24321869	+	8	-29.5	70.2	1.449777778	2	0.04015544	0.642201835	-4.0925	3	35	active	0.988995603	True
Canis_lupus_familiaris	tRNA-Pro-CGG-1-1	chr5	33029190	33029262	-	4	-29.5	70.2	1.483847222	7	0.126943005	0.998058488	-2.84385	6	128	active	0.944242916	True
Canis_lupus_familiaris	tRNA-Pro-CGG-1-2	chr6	38036835	38036907	-	4	-29.5	70.2	0.408708333	26	0.069948187	0.661375661	-1.2817	6	46	active	0.979481617	True
Canis_lupus_familiaris	tRNA-Pro-CGG-1-3	chr7	30748431	30748503	-	4	-29.5	70.2	1.213847222	4	0.111398964	1.015325671	-0.84925	1	14	active	0.971661316	True
Canis_lupus_familiaris	tRNA-Pro-CGG-2-1	chr35	24513745	24513817	+	4	-27.6	65.9	0.742333333	6	0.042746114	0.496031746	-2.49135	0	25	active	0.984681837	True
Canis_lupus_familiaris	tRNA-Pro-TGG-1-1	chr15	17927802	17927874	+	5	-29.5	74.9	0.372027778	15	0.126943005	1.072738219	-3.4588	4	28	active	0.941570331	True
Canis_lupus_familiaris	tRNA-Pro-TGG-2-1	chr6	38027543	38027615	-	5	-29.5	70.3	0.221680556	8	0.082901554	0.941040906	-1.0577	7	48	active	0.975757146	True
Canis_lupus_familiaris	tRNA-Pro-TGG-2-2	chr6	38051893	38051965	-	5	-29.5	70.3	0.875222222	2	0.06865285	0.630857967	-4.76315	3	50	active	0.987383858	True
Canis_lupus_familiaris	tRNA-Pro-TGG-3-1	chr21	22420763	22420835	+	5	-28.9	70.5	1.622375	3	0.088082902	0.925984252	-4.1931	1	14	active	0.980312499	True
Canis_lupus_familiaris	tRNA-Pro-TGG-4-1	chr11	388875	388947	-	5	-22.7	55.1	0.925013889	2	0.079015544	0.795454545	-4.0219	2	33	active	0.778667224	True
Canis_lupus_familiaris	tRNA-SeC-TCA-1-1	chr1	110084042	110084129	+	1	-37.1	146.9	1.493333333	11	0.034307497	0.762910798	-4.75525	0	63	active	0.928526143	True
Canis_lupus_familiaris	tRNA-Ser-AGA-1-1	chr5	33032211	33032293	-	10	-32.8	89.6	1.425195122	5	0.07544757	0.671504838	-4.84655	6	134	active	0.987355659	True
Canis_lupus_familiaris	tRNA-Ser-AGA-1-2	chr29	39875020	39875102	-	10	-32.8	89.6	?	30	0.157289003	1.005551227	?	0	7	active	0.91992623	True
Canis_lupus_familiaris	tRNA-Ser-AGA-1-3	chr35	24800433	24800515	+	10	-32.8	89.6	0.760768293	4	0.093350384	0.845518118	-1.6614	1	24	active	0.981369504	True
Canis_lupus_familiaris	tRNA-Ser-AGA-1-4	chr35	24816245	24816327	+	10	-32.8	89.6	0.590378049	8	0.069053708	0.875	-2.0696	3	15	active	0.984624141	True
Canis_lupus_familiaris	tRNA-Ser-AGA-1-5	chr35	24834974	24835056	+	10	-32.8	89.6	0.940621951	179	0.062659847	0.727272727	-2.68495	2	11	active	0.908922797	True
Canis_lupus_familiaris	tRNA-Ser-AGA-1-6	chr35	24847277	24847359	-	10	-32.8	89.6	0.938365854	173	0.061381074	0.710127029	-2.67805	3	8	active	0.914763822	True
Canis_lupus_familiaris	tRNA-Ser-AGA-2-1	chr35	24857355	24857437	-	10	-33.4	89.2	0.697317073	7	0.025575448	0.49082101	-1.62945	1	4	active	0.960077606	True
Canis_lupus_familiaris	tRNA-Ser-AGA-3-1	chr35	24809231	24809313	+	10	-30.8	76.8	0.141914634	5	0.063938619	0.626566416	-0.00845	3	21	active	0.931488375	True
Canis_lupus_familiaris	tRNA-Ser-AGA-4-1	chr2	33301116	33301198	+	10	-27.4	65.5	0	5	0.024296675	0.307017544	-0.2018	0	5	active	0.53313902	True
Canis_lupus_familiaris	tRNA-Ser-AGA-5-1	chr35	24840760	24840842	+	10	-16.4	55.9	0.924207317	4	0.006393862	0.079690346	-2.70855	3	10	inactive	-0.676482043	True
Canis_lupus_familiaris	tRNA-Ser-CGA-1-1	chr5	32956354	32956436	-	4	-34	95.1	1.596609756	7	0.094629156	0.988344148	-0.72995	2	99	active	0.977765342	True
Canis_lupus_familiaris	tRNA-Ser-CGA-2-1	chr35	24936443	24936525	-	4	-34	94	0.684426829	6	0.017902813	0	-1.7784	4	26	active	0.741293491	True
Canis_lupus_familiaris	tRNA-Ser-CGA-3-1	chr10	504154	504236	+	4	-29.8	89.6	1.6625	5	0.106138107	0.796963947	-0.8238	0	140	active	0.983627118	True
Canis_lupus_familiaris	tRNA-Ser-CGA-4-1	chr35	24595775	24595856	+	4	-32	83.8	0.708987654	11	0.011523688	0.227125243	-1.7236	1	24	active	0.559428068	True
Canis_lupus_familiaris	tRNA-Ser-GCT-1-1	chr18	50964122	50964204	-	8	-30.7	89.1	1.684317073	6	0.069053708	0.875	-2.49595	0	84	active	0.98711698	True
Canis_lupus_familiaris	tRNA-Ser-GCT-2-1	chr35	24660289	24660371	+	8	-30.4	89.7	0.095025	33	0.02685422	0.352315214	-2.554	1	30	active	0.933766249	True
Canis_lupus_familiaris	tRNA-Ser-GCT-3-1	chr5	33000979	33001061	+	8	-30.7	88.4	1.637512195	29	0.116368286	1.048344719	-3.81985	3	125	active	0.972640152	True
Canis_lupus_familiaris	tRNA-Ser-GCT-3-2	chr30	7753287	7753369	-	8	-30.7	88.4	1.616414634	8	0.047314578	1.019367992	-1.10505	0	41	active	0.98546362	True
Canis_lupus_familiaris	tRNA-Ser-GCT-3-3	chr35	24203181	24203263	-	8	-30.7	88.4	1.421402439	31	0.052429668	0.172413793	-4.15535	6	38	active	0.919594713	True
Canis_lupus_familiaris	tRNA-Ser-GCT-4-1	chr24	1364707	1364789	+	8	-29.3	86.7	0.072814815	27	0.020460358	0.571895425	-0.33965	0	9	active	0.736769211	True
Canis_lupus_familiaris	tRNA-Ser-GCT-5-1	chr35	24474030	24474112	-	8	-30.4	89	0.654658537	10	0.060102302	0.81300813	-2.302	0	22	active	0.985302382	True
Canis_lupus_familiaris	tRNA-Ser-GCT-6-1	chr35	24525282	24525364	+	8	-32.5	83.8	0.671682927	9	0.07544757	0.824760044	-2.254947368	0	22	active	0.983984037	True
Canis_lupus_familiaris	tRNA-Ser-TGA-1-1	chr35	24211266	24211348	-	3	-32.8	89.7	1.375987805	8	0.031969309	0.549968573	-3.3696	5	35	active	0.946987094	True
Canis_lupus_familiaris	tRNA-Ser-TGA-2-1	chr35	24820161	24820243	-	3	-32.2	86.8	0.151731707	1	0.028132992	0.420875421	-2.6112	3	14	active	0.928511191	True
Canis_lupus_familiaris	tRNA-Ser-TGA-3-1	chr4	19071751	19071833	+	3	-34.9	94	1.593707317	17	0.046035806	0.940649496	-2.4741	0	10	active	0.919723918	True
Canis_lupus_familiaris	tRNA-Sup-CTA-1-1	chr1	89656166	89656239	-	2	-24.5	64.4	-0.025767123	51	0.012936611	0.247175141	-0.3359	0	16	inactive	-0.846488974	True
Canis_lupus_familiaris	tRNA-Sup-CTA-2-1	chr2	35872769	35872842	-	2	-13.9	53.1	?	351	0	0	?	0	88	inactive	-0.791412322	True
Canis_lupus_familiaris	tRNA-Thr-AGT-1-1	chr35	25818226	25818300	+	8	-27	83.9	-0.134056338	9	0.067183463	0.944952752	-1.79655	3	4	active	0.948414914	True
Canis_lupus_familiaris	tRNA-Thr-AGT-2-1	chr1	118960705	118960779	-	8	-27.3	82.6	1.638148649	21	0.131782946	1.004734085	-1.4364	0	43	active	0.935813617	True
Canis_lupus_familiaris	tRNA-Thr-AGT-2-2	chr5	33001316	33001390	+	8	-27.3	82.6	0.720864865	14	0.073643411	0.927397986	-4.0452	3	125	active	0.987727138	True
Canis_lupus_familiaris	tRNA-Thr-AGT-2-3	chr5	33031886	33031960	-	8	-27.3	82.6	1.368635135	30	0.064599483	0.991586538	-3.24625	6	133	active	0.982658642	True
Canis_lupus_familiaris	tRNA-Thr-AGT-3-1	chr35	24297887	24297961	-	8	-27	81.4	1.612986486	7	0.032299742	0.682471264	-3.51025	3	31	active	0.989149791	True
Canis_lupus_familiaris	tRNA-Thr-AGT-4-1	chr5	32956879	32956953	-	8	-27.3	80.1	1.336635135	140	0.100775194	0.759368836	-3.98145	2	99	active	0.935889034	True
Canis_lupus_familiaris	tRNA-Thr-AGT-5-1	chr35	24941455	24941529	-	8	-25.3	78.6	0.573445946	19	0.005167959	0.086805556	-2.80675	4	28	inactive	-0.598557358	True
Canis_lupus_familiaris	tRNA-Thr-AGT-6-1	chr35	24574804	24574878	+	8	-24.8	79.1	1.461918919	11	0.009043928	0.616921269	-2.3965	3	26	active	0.745527927	True
Canis_lupus_familiaris	tRNA-Thr-CGT-1-1	chr35	25601671	25601745	-	4	-24	82.8	0.903310811	4	0.032299742	0.745614035	-1.8989	0	24	active	0.983024667	True
Canis_lupus_familiaris	tRNA-Thr-CGT-2-1	chr6	28896498	28896570	-	4	-27	79.6	0	30	0.134715026	1.108724832	0	0	21	active	0.716175383	True
Canis_lupus_familiaris	tRNA-Thr-CGT-3-1	chr35	24897948	24898021	+	4	-27.5	76.8	0.713589041	13	0.031047865	0.680272109	-0.6707	1	11	active	0.94125285	True
Canis_lupus_familiaris	tRNA-Thr-CGT-4-1	chrX	114614115	114614188	+	4	-19.5	53.4	-0.091178082	14	0.007761966	0.133282559	-0.0501	0	32	inactive	-0.930282621	True
Canis_lupus_familiaris	tRNA-Thr-TGT-1-1	chr35	25582517	25582591	-	4	-26	78.3	0.851918919	4	0.012919897	0.29211295	-2.11845	0	19	inactive	-0.51033629	True
Canis_lupus_familiaris	tRNA-Thr-TGT-2-1	chr38	16787090	16787163	+	4	-29.1	84.1	0.493547945	15	0.045278137	0.430731364	-3.04395	0	32	active	0.963797613	True
Canis_lupus_familiaris	tRNA-Thr-TGT-3-1	chr11	391217	391290	-	4	-29.7	78.8	1.528561644	7	0.091849935	0.86450247	-3.674	2	33	active	0.986280474	True
Canis_lupus_familiaris	tRNA-Thr-TGT-3-2	chr15	17919481	17919554	-	4	-29.7	78.8	1.35969863	7	0.099611902	0.772413793	-1.7284	5	28	active	0.981687499	True
Canis_lupus_familiaris	tRNA-Trp-CCA-1-1	chr35	24224831	24224903	-	6	-25.1	75.7	1.298222222	4	0.019430052	0.33993784	-2.7995	1	35	active	0.862762979	True
Canis_lupus_familiaris	tRNA-Trp-CCA-2-1	chr5	33000497	33000569	+	6	-25.1	73.3	1.595208333	4	0.14119171	0.802025047	-1.7731	3	124	active	0.941812097	True
Canis_lupus_familiaris	tRNA-Trp-CCA-3-1	chr6	10109497	10109569	-	6	-25.1	74.3	0.502911765	10	0.055699482	0.507099391	-1.5299	0	74	active	0.984502215	True
Canis_lupus_familiaris	tRNA-Trp-CCA-4-1	chr5	33027577	33027649	-	6	-24.5	73.4	1.141222222	13	0.063471503	0.810185185	-3.66255	6	123	active	0.988073909	True
Canis_lupus_familiaris	tRNA-Trp-CCA-5-1	chr15	37923588	37923660	+	6	-25.1	74.3	1.702111111	5	0.080310881	0.982504243	0.596	1	30	active	0.966791602	True
Canis_lupus_familiaris	tRNA-Trp-CCA-6-1	chr5	40705325	40705399	-	6	-16.1	57.6	1.147445946	6	0.131782946	0.999802994	-2.16755	0	21	active	0.746333368	True
Canis_lupus_familiaris	tRNA-Tyr-GTA-1-1	chr35	24339256	24339346	+	9	-32	77.9	1.613671233	7	0.064556962	0.791855204	-3.54265	2	33	active	0.987910903	True
Canis_lupus_familiaris	tRNA-Tyr-GTA-1-2	chr35	24344524	24344612	+	9	-27.7	78	0.667027397	6	0.058375635	0.486111111	-2.3988	2	32	active	0.987643058	True
Canis_lupus_familiaris	tRNA-Tyr-GTA-2-1	chr17	21046271	21046361	+	9	-30.3	77.9	1.684082192	12	0.058227848	0.776053215	-3.65215	1	98	active	0.988007484	True
Canis_lupus_familiaris	tRNA-Tyr-GTA-3-1	chr35	24354979	24355070	+	9	-29.7	77.5	0.685561644	7	0.02022756	0.323076923	-2.066105263	1	32	active	0.897178112	True
Canis_lupus_familiaris	tRNA-Tyr-GTA-4-1	chr15	17926181	17926272	-	9	-34.8	75.4	-0.110780822	11	0.064475348	0.781763237	-4.3482	5	27	active	0.945946286	True
Canis_lupus_familiaris	tRNA-Tyr-GTA-4-2	chr29	15776331	15776424	+	9	-31	75.3	0.866506849	8	0.090794451	0.866682642	-2.8873	3	22	active	0.98509596	True
Canis_lupus_familiaris	tRNA-Tyr-GTA-4-3	chr29	15776937	15777027	+	9	-30.6	75.4	1.257013699	13	0.087341772	1.131221719	-3.3045	3	22	active	0.981280327	True
Canis_lupus_familiaris	tRNA-Tyr-GTA-5-1	chr8	13428589	13428679	-	9	-30.7	69.3	0.091410959	12	0.124050633	0.923530629	-0.22285	0	24	active	0.845704121	True
Canis_lupus_familiaris	tRNA-Tyr-GTA-6-1	chr16	14338938	14339010	-	9	-28	66.3	0.166972222	13	0.012953368	0.252525253	-2.30625	2	36	active	0.514903532	True
Canis_lupus_familiaris	tRNA-Und-NNN-1-1	chr5	77225906	77225981	+	2	-26.8	65	0.644866667	5	0.130322581	0.815280689	-1.16835	0	49	active	0.852934159	True
Canis_lupus_familiaris	tRNA-Und-NNN-2-1	chr15	17926713	17926785	-	2	-28.9	63.3	0.300277778	15	0.041450777	0.845410628	-3.71355	4	28	active	0.936904419	True
Canis_lupus_familiaris	tRNA-Val-AAC-1-1	chr11	388487	388560	-	6	-24.7	79.4	0.193835616	17	0.062095731	0.919976636	-4.30865	2	33	active	0.986542527	True
Canis_lupus_familiaris	tRNA-Val-AAC-1-2	chr11	411121	411194	-	6	-24.7	79.4	0.677493151	17	0.041397154	0.657894737	-3.675	4	33	active	0.988020914	True
Canis_lupus_familiaris	tRNA-Val-AAC-1-3	chr34	34376537	34376610	+	6	-24.7	79.4	1.615041096	4	0.03622251	0.529719318	-6.00265	0	45	active	0.988191354	True
Canis_lupus_familiaris	tRNA-Val-AAC-2-1	chr35	24609562	24609635	+	6	-23.7	79	-0.027657534	11	0.02457956	0.166165533	-1.756	0	34	active	0.646096175	True
Canis_lupus_familiaris	tRNA-Val-AAC-3-1	chr35	24437202	24437275	-	6	-26.9	76.7	-0.358835616	8	0.046571798	0.513196481	-1.948111111	3	25	active	0.939280511	True
Canis_lupus_familiaris	tRNA-Val-AAC-4-1	chr35	24938068	24938141	-	6	-20.8	65.1	0.374493151	54	0.006468305	0.147960262	-0.84675	4	27	inactive	-0.814044602	True
Canis_lupus_familiaris	tRNA-Val-CAC-1-1	chr11	414794	414867	-	8	-24.7	79.4	1.382986301	2	0.086675291	0.851640712	-2.6176	3	33	active	0.986874277	True
Canis_lupus_familiaris	tRNA-Val-CAC-1-5	chr17	58999267	58999340	-	8	-24.7	79.4	0.267205479	279	0.062095731	0.670415225	-3.3185	2	23	active	0.873996403	True
Canis_lupus_familiaris	tRNA-Val-CAC-1-6	chr35	24302408	24302481	+	8	-24.7	79.4	1.302273973	11	0.120310479	1.180392157	-3.33295	3	32	active	0.938273016	True
Canis_lupus_familiaris	tRNA-Val-CAC-2-1	chr20	55036663	55036736	+	8	-22.5	80.4	0.210027397	8	0.077619664	0.702341137	-2.70855	1	46	active	0.983733554	True
Canis_lupus_familiaris	tRNA-Val-CAC-3-1	chr35	24589380	24589453	-	8	-24.2	71.6	0.555479452	10	0.03622251	0.231073944	-1.53935	2	24	active	0.850049535	True
Canis_lupus_familiaris	tRNA-Val-TAC-1-1	chr35	24571138	24571211	-	5	-23.6	83.5	0.514424658	16	0.056921087	1.176948052	-1.4795	2	26	active	0.978757536	True
Canis_lupus_familiaris	tRNA-Val-TAC-2-1	chrX	14751817	14751890	-	5	-23.6	82.9	1.302657534	12	0.065976714	1.026995305	-4.68975	0	27	active	0.985132299	True
Canis_lupus_familiaris	tRNA-Val-TAC-3-1	chr18	37205942	37206015	+	5	-26	79.2	1.157835616	18	0.129366106	0.901674538	-2.88135	5	27	active	0.944180409	True
Canis_lupus_familiaris	tRNA-Val-TAC-4-1	chr35	24639079	24639152	-	5	-26.3	76	0.258876712	47	0.009055627	0.078125	-0.9557	0	28	inactive	-0.781880281	True
Canis_lupus_familiaris	tRNA-Val-TAC-5-1	chr19	7880715	7880789	-	5	-19.3	56	?	199	0.019379845	0.331021438	-2.751	0	2	active	0.543771098	True
Capra_hircus	NC_030808.1.tRNA10116-ValAAC	NC_030808.1	97128890	97128963	-	11	-24.7	79.4	1.458945205	1	0.028460543	0.518092105	-6.2462	0	35	active	0.987276541	True
Capra_hircus	NC_030808.1.tRNA10120-TyrGTA	NC_030808.1	97084200	97084290	-	16	-28.1	77.7	0.077767123	7	0.015189873	0.398957824	-0.04025	0	41	inactive	-0.551770693	True
Capra_hircus	NC_030808.1.tRNA10624-SerGCT	NC_030808.1	85190807	85190878	-	9	-16.9	56.3	-0.04871831	315	0.006485084	0	0.02815	0	0	inactive	-0.929421529	True
Capra_hircus	NC_030808.1.tRNA11284-GlnCTG	NC_030808.1	70977546	70977618	-	14	-13	56	0.074555556	86	0.00388601	0.11820331	0.02545	0	19	inactive	-0.899859861	True
Capra_hircus	NC_030808.1.tRNA11733-LysTTT	NC_030808.1	60688030	60688103	-	21	-23.8	62.2	0.099506849	11	0.006468305	0.147306397	-0.2593	0	0	inactive	-0.879291182	True
Capra_hircus	NC_030808.1.tRNA12526-GluTTC	NC_030808.1	42960854	42960927	-	38	-24.2	67.2	0.023493151	351	0.010349288	0.295508274	-0.46755	0	17	inactive	-0.918911846	True
Capra_hircus	NC_030808.1.tRNA1463-SerGGA	NC_030808.1	30237431	30237503	+	27	-18	61.8	0	137	0.007772021	0.75	0	0	0	inactive	-0.635534102	True
Capra_hircus	NC_030808.1.tRNA1511-SerGGA	NC_030808.1	32091688	32091761	+	27	-14.2	63.3	-0.090986301	265	0.010349288	0.051072523	-0.3565	0	0	inactive	-0.910021094	True
Capra_hircus	NC_030808.1.tRNA3514-LysTTT	NC_030808.1	80071035	80071110	+	21	-19	59.6	?	27	0.002580645	0	0.330875	0	26	inactive	-0.902050823	True
Capra_hircus	NC_030808.1.tRNA3703-SerGGA	NC_030808.1	83998315	83998387	+	27	-19.5	64.6	0.054819444	351	0.007772021	0.176544767	-0.22275	0	0	inactive	-0.923772427	True
Capra_hircus	NC_030808.1.tRNA3724-ArgCCT	NC_030808.1	84820101	84820174	+	19	-21.3	72	-0.001931507	96	0.003880983	0.199771689	-0.31495	0	0	inactive	-0.907165853	True
Capra_hircus	NC_030808.1.tRNA4100-CysGCA	NC_030808.1	93642757	93642829	+	38	-23.6	59.8	-0.590736111	338	0.006476684	0.106286061	-0.06235	0	2	inactive	-0.910689478	True
Capra_hircus	NC_030808.1.tRNA4637-CysGCA	NC_030808.1	106102780	106102853	+	38	-14.1	65.9	?	351	0.01164295	0.158061117	?	0	2	inactive	-0.922071917	True
Capra_hircus	NC_030808.1.tRNA4994-ArgTCT	NC_030808.1	112463773	112463846	+	12	-21.6	61.8	-0.050986301	277	0	0	-0.10055	0	0	inactive	-0.93639991	True
Capra_hircus	NC_030808.1.tRNA563-ArgCCT	NC_030808.1	8738739	8738812	+	19	-20.6	75	0.033356164	132	0.021992238	0.45751634	0.12085	0	4	inactive	-0.5218312	True
Capra_hircus	NC_030808.1.tRNA5684-GlyTCC	NC_030808.1	125936242	125936315	+	20	-17.1	64.8	-0.42418	38	0.005174644	0.259259259	-0.505571429	0	17	inactive	-0.856656245	True
Capra_hircus	NC_030808.1.tRNA6051-TrpCCA	NC_030808.1	132535439	132535512	+	40	-12.2	54.9	0	195	0.010349288	0.259547646	-0.01315	0	27	inactive	-0.932176929	True
Capra_hircus	NC_030808.1.tRNA6233-CysACA	NC_030808.1	137019439	137019511	+	2	-12.3	50.6	1.179944444	34	0.002590674	0	0.21195	1	0	inactive	-0.804458531	True
Capra_hircus	NC_030808.1.tRNA6234-CysGCA	NC_030808.1	137022068	137022140	+	38	-24.6	78	1.056294118	9	0.006476684	0.154049296	-1.410411765	1	0	inactive	-0.887859481	True
Capra_hircus	NC_030808.1.tRNA6805-SerGGA	NC_030808.1	148725113	148725186	+	27	-13.2	60.1	0.07827027	351	0.015523933	0	0.121933333	0	0	inactive	-0.896984365	True
Capra_hircus	NC_030808.1.tRNA923-LysTTT	NC_030808.1	18036603	18036676	+	21	-21.3	61.7	0.047506849	48	0.003880983	0.078125	-0.2392	0	13	inactive	-0.904985076	True
Capra_hircus	NC_030809.1.tRNA1116-GlyCCC	NC_030809.1	16104404	16104476	+	37	-19.8	64.7	0.026777778	89	0.005181347	0.171232877	-0.353	0	11	inactive	-0.961517017	True
Capra_hircus	NC_030809.1.tRNA11779-UndetNNN	NC_030809.1	16462236	16462308	-	4	-21.4	52.5	0.004069444	240	0.012953368	0.072629176	-0.0613	0	27	inactive	-0.94831518	True
Capra_hircus	NC_030809.1.tRNA11874-GlyCCC	NC_030809.1	15045885	15045958	-	37	-25.6	59	0.022575342	125	0.009055627	0.118083671	-0.0798	0	20	inactive	-0.92626213	True
Capra_hircus	NC_030809.1.tRNA2594-SerGGA	NC_030809.1	43126835	43126908	+	27	-17.7	63	0.050643836	351	0.010349288	0.226098191	-0.32515	0	1	inactive	-0.917631364	True
Capra_hircus	NC_030809.1.tRNA2963-CysGCA	NC_030809.1	50468136	50468208	+	38	-19.5	69.9	-0.055791667	264	0.007772021	0.179441169	-0.43075	0	28	inactive	-0.966581316	True
Capra_hircus	NC_030809.1.tRNA4035-ArgCCT	NC_030809.1	76268277	76268350	+	19	-18.2	68.7	0.05560274	281	0.001293661	0.112504018	-0.20025	0	5	inactive	-0.906888578	True
Capra_hircus	NC_030809.1.tRNA432-ValCAC	NC_030809.1	6339343	6339416	+	15	-24.1	56.3	0.072369863	134	0.009055627	0.133307941	-0.0396	0	7	inactive	-0.91074011	True
Capra_hircus	NC_030809.1.tRNA4381-SerGGA	NC_030809.1	86241720	86241793	+	27	-15.4	59.2	0	132	0.007761966	0	-0.2132	0	2	inactive	-0.91662086	True
Capra_hircus	NC_030809.1.tRNA4774-AlaCGC	NC_030809.1	96314967	96315039	+	3	-27.6	74.4	1.588166667	14	0.056994819	0.792947203	-2.62555	1	13	active	0.925811246	True
Capra_hircus	NC_030809.1.tRNA5455-GlyCCC	NC_030809.1	111980992	111981064	+	37	-21.1	60.1	0.071222222	351	0.009067358	0.436590437	-0.755	0	1	inactive	-0.687805774	True
Capra_hircus	NC_030809.1.tRNA550-GluTTC	NC_030809.1	7639586	7639658	+	38	-26.7	71.2	0.099833333	9	0.03238342	0.419720187	0.04215	0	24	active	0.692901111	True
Capra_hircus	NC_030809.1.tRNA6388-GluTTC	NC_030809.1	135236113	135236185	+	38	-24.8	70.4	0.709541667	11	0.062176166	1.091988728	-2.7675	0	50	active	0.921482158	True
Capra_hircus	NC_030809.1.tRNA6449-GluCTC	NC_030809.1	135659539	135659612	-	11	-23.3	64.9	0.111054795	351	0.003880983	0.078090138	0.0755	0	45	inactive	-0.895089618	True
Capra_hircus	NC_030809.1.tRNA6532-SerGGA	NC_030809.1	132949552	132949624	-	27	-18.3	64.5	?	351	0.00388601	0	0.122	0	0	inactive	-0.896522948	True
Capra_hircus	NC_030809.1.tRNA6606-SerGGA	NC_030809.1	131307076	131307148	-	27	-20	65.8	?	351	0.011658031	0.28340081	-0.198111111	0	35	inactive	-0.897885318	True
Capra_hircus	NC_030809.1.tRNA8109-GlyGCC	NC_030809.1	96315326	96315397	-	11	-26.4	81	0.975676056	8	0.028534371	0.124777184	-4.2033	1	13	active	0.895370016	True
Capra_hircus	NC_030809.1.tRNA8271-CysGCA	NC_030809.1	92240967	92241039	-	38	-13.8	62.1	?	137	0.012953368	0.339213026	-0.9255	0	4	inactive	-0.864346513	True
Capra_hircus	NC_030809.1.tRNA8895-CysGCA	NC_030809.1	75496687	75496759	-	38	-19.5	64.6	-0.016361111	185	0.005181347	0.06884343	-0.3163	0	0	inactive	-0.938348222	True
Capra_hircus	NC_030810.1.tRNA10109-TrpCCA	NC_030810.1	21822566	21822640	-	40	-26.6	52	0.122405405	231	0.007751938	0.180041152	-0.137	0	35	inactive	-0.904223886	True
Capra_hircus	NC_030810.1.tRNA1423-ProAGG	NC_030810.1	29105626	29105698	+	6	-23.8	57.2	-0.039986111	351	0.012953368	0.087719298	0.0824	0	34	inactive	-0.949461638	True
Capra_hircus	NC_030810.1.tRNA1706-AlaAGC	NC_030810.1	34886133	34886204	+	12	-21.8	62.5	-0.067941176	273	0	0	-0.631230769	0	13	inactive	-0.953028418	True
Capra_hircus	NC_030810.1.tRNA3154-GluTTC	NC_030810.1	69359466	69359538	+	38	-20.3	60.1	0.098	58	0.006476684	0	-0.0005	0	33	inactive	-0.928477926	True
Capra_hircus	NC_030810.1.tRNA3240-ArgTCT	NC_030810.1	70909496	70909581	+	12	-30.7	71.1	1.583356164	4	0.085350318	0.915525465	0.67875	0	19	active	0.959195532	True
Capra_hircus	NC_030810.1.tRNA3862-SupTCA	NC_030810.1	85701177	85701250	+	5	-20.9	66.6	0.072219178	243	0.002587322	0	-0.19765	0	12	inactive	-0.901975085	True
Capra_hircus	NC_030810.1.tRNA4548-GlnTTG	NC_030810.1	97950380	97950452	+	5	-19.7	61.7	-0.637388889	18	0.034974093	0.870827286	-1.122333333	0	12	active	0.716554018	True
Capra_hircus	NC_030810.1.tRNA4607-GluCTC	NC_030810.1	99179273	99179345	+	11	-26.4	73.2	1.269125	7	0.028497409	0.762527233	-3.99235	3	33	active	0.988258529	True
Capra_hircus	NC_030810.1.tRNA4608-GlyTCC	NC_030810.1	99181685	99181757	+	20	-25.1	73.8	1.263013889	10	0.023316062	0.46113307	-3.0822	4	32	active	0.982862247	True
Capra_hircus	NC_030810.1.tRNA4609-HisGTG	NC_030810.1	99182771	99182843	+	13	-25.5	60.1	1.245069444	30	0.06865285	0.898036591	-1.25855	4	32	active	0.976576111	True
Capra_hircus	NC_030810.1.tRNA4610-LysCTT	NC_030810.1	99183864	99183937	+	14	-28	87.8	1.093821918	8	0.050452781	0.868599791	-3.90495	4	32	active	0.988509611	True
Capra_hircus	NC_030810.1.tRNA4611-GlnCTG	NC_030810.1	99214678	99214750	+	14	-24.2	71.1	-0.420444444	25	0.03626943	0.266565118	-1.02635	1	18	active	0.635819928	True
Capra_hircus	NC_030810.1.tRNA4617-AsnGTT	NC_030810.1	99274117	99274191	+	22	-26.4	80.9	0.436986486	12	0.051679587	0.72878709	-1.68965	4	13	active	0.983594586	True
Capra_hircus	NC_030810.1.tRNA4618-GluTTC	NC_030810.1	99274531	99274603	+	38	-26.4	73.2	-0.237416667	7	0.037564767	0.623022152	-0.48285	3	13	active	0.706165325	True
Capra_hircus	NC_030810.1.tRNA4620-AsnGTT	NC_030810.1	99298082	99298156	+	22	-26.4	79.9	0.448054054	8	0.050387597	0.786516854	-1.5079	2	20	active	0.98503162	True
Capra_hircus	NC_030810.1.tRNA4751-AsnGTT	NC_030810.1	101396464	101396538	+	22	-26.4	80.9	0.013148649	12	0.080103359	0.61256448	-0.309388889	5	8	active	0.791361596	True
Capra_hircus	NC_030810.1.tRNA4752-ValCAC	NC_030810.1	101397142	101397215	+	15	-24.7	79.4	0.109068493	13	0.071151358	0.613006397	-3.31635	5	8	active	0.980724288	True
Capra_hircus	NC_030810.1.tRNA4753-GluTTC	NC_030810.1	101397712	101397784	+	38	-26.4	68.7	-0.081944444	66	0.049222798	0.68627451	-0.846166667	5	8	active	0.800179333	True
Capra_hircus	NC_030810.1.tRNA4754-HisGTG	NC_030810.1	101405872	101405944	+	13	-25.5	60.1	0.122111111	32	0.055699482	1.118925831	-0.5103	5	7	active	0.899850245	True
Capra_hircus	NC_030810.1.tRNA4755-GlyCCC	NC_030810.1	101431361	101431432	+	37	-26.4	79.3	-0.025239437	15	0.042801556	0.500581032	-0.3308	6	1	active	0.697399625	True
Capra_hircus	NC_030810.1.tRNA4756-GlnCTG	NC_030810.1	101435878	101435950	+	14	-24.2	71.1	-0.420444444	25	0.042746114	0.341653884	-1.08315	6	1	active	0.700249847	True
Capra_hircus	NC_030810.1.tRNA4761-AsnGTT	NC_030810.1	101468001	101468075	+	22	-26.4	80.9	0.013148649	11	0.07751938	0.628205128	-0.26595	4	0	active	0.789985465	True
Capra_hircus	NC_030810.1.tRNA4762-ValCAC	NC_030810.1	101468672	101468745	+	15	-24.7	79.4	0.109068493	9	0.056921087	0.621141975	-3.31635	4	0	active	0.974700938	True
Capra_hircus	NC_030810.1.tRNA4763-GluTTC	NC_030810.1	101469690	101469762	+	38	-26.4	68.7	-0.081944444	5	0.042746114	0.659199048	-0.74955	4	0	active	0.80211143	True
Capra_hircus	NC_030810.1.tRNA4764-AsnGTT	NC_030810.1	101470763	101470837	+	22	-26.4	80.9	-1.091972973	11	0.042635659	0.512016719	-1.24	4	0	active	0.932484741	True
Capra_hircus	NC_030810.1.tRNA4765-HisGTG	NC_030810.1	101499572	101499644	+	13	-25.5	60.1	0.122111111	28	0.033678756	0.837053571	-0.34905	1	0	active	0.876607015	True
Capra_hircus	NC_030810.1.tRNA4766-AsnGTT	NC_030810.1	101504003	101504077	+	22	-26.4	80.9	0.022054054	10	0.049095607	0.768256648	-0.70865	2	0	active	0.852796805	True
Capra_hircus	NC_030810.1.tRNA4768-HisGTG	NC_030810.1	101560103	101560175	+	13	-25.5	60.1	0.122111111	30	0.056994819	0.903128696	-0.0382	1	1	active	0.890854088	True
Capra_hircus	NC_030810.1.tRNA4771-GlyCCC	NC_030810.1	101588132	101588203	+	37	-26.3	71.1	0.023661972	5	0.028534371	0.326188257	-0.60935	5	1	inactive	-0.548696764	True
Capra_hircus	NC_030810.1.tRNA4773-AsnGTT	NC_030810.1	101600004	101600078	+	22	-26.4	80.9	0.078513514	33	0.074935401	0.991159	-0.1761	3	1	active	0.821493265	True
Capra_hircus	NC_030810.1.tRNA4776-ValAAC	NC_030810.1	101626004	101626077	+	11	-19.9	79	-0.019287671	19	0.02457956	0.357142857	-0.02075	0	8	inactive	-0.729090689	True
Capra_hircus	NC_030810.1.tRNA4778-ValAAC	NC_030810.1	101660999	101661072	+	11	-20.2	67.3	0	17	0.033635188	0.546875	0	1	11	active	0.586982397	True
Capra_hircus	NC_030810.1.tRNA4781-AsnGTT	NC_030810.1	101681989	101682063	+	22	-22.3	71.1	0.122148649	12	0.064599483	0.449604743	-0.3293	3	11	active	0.889247936	True
Capra_hircus	NC_030810.1.tRNA4782-ValCAC	NC_030810.1	101682668	101682741	+	15	-24.7	79.4	0.122150685	13	0.065976714	0.555379245	-0.5261	3	11	active	0.904207661	True
Capra_hircus	NC_030810.1.tRNA4783-GluTTC	NC_030810.1	101683238	101683310	+	38	-22.9	63.4	-0.047263889	66	0.044041451	0.629609642	-0.45375	3	11	active	0.668572961	True
Capra_hircus	NC_030810.1.tRNA4785-GlyCCC	NC_030810.1	101720630	101720701	+	37	-26.4	79.3	-0.025239437	15	0.04150454	0.500581032	-0.3308	5	12	active	0.673785375	True
Capra_hircus	NC_030810.1.tRNA4786-GlnCTG	NC_030810.1	101725147	101725219	+	14	-24.2	71.1	-0.396625	25	0.037564767	0.290577003	-1.08315	4	13	active	0.678231823	True
Capra_hircus	NC_030810.1.tRNA4864-iMetCAT	NC_030810.1	103442931	103443003	+	11	-26.1	60.4	1.561222222	6	0.03238342	0.643678161	-4.4474	0	79	active	0.987324744	True
Capra_hircus	NC_030810.1.tRNA5241-LeuCAG	NC_030810.1	112021153	112021235	+	6	-32.4	61.5	?	8	0.12915601	0.999571612	?	7	18	active	0.918629912	True
Capra_hircus	NC_030810.1.tRNA5242-GlyTCC	NC_030810.1	112022539	112022611	+	20	-25.1	73.8	0	11	0.119170984	1.027173913	0	8	16	active	0.623602117	True
Capra_hircus	NC_030810.1.tRNA5243-GluCTC	NC_030810.1	112022886	112022958	+	11	-22.4	60.3	-0.0664	60	0.079015544	0.774393392	0.042	8	17	active	0.636675487	True
Capra_hircus	NC_030810.1.tRNA5253-GlyTCC	NC_030810.1	112111737	112111809	+	20	-25.1	73.8	0.901402778	10	0.046632124	0.73979308	-1.94245	3	15	active	0.986299664	True
Capra_hircus	NC_030810.1.tRNA5254-AspGTC	NC_030810.1	112112696	112112768	+	13	-26.4	66.5	0.602875	13	0.03238342	0.898752751	-3.80215	2	15	active	0.987089338	True
Capra_hircus	NC_030810.1.tRNA5255-AsnGTT	NC_030810.1	112125049	112125123	+	22	-26.4	80.9	1.169594595	11	0.042635659	0.651162791	-4.51905	0	13	active	0.986810932	True
Capra_hircus	NC_030810.1.tRNA5513-ProCGG	NC_030810.1	119081309	119081381	+	2	-29.5	70.2	1.141958333	4	0.082901554	0.818867925	-1.0661	1	10	active	0.900538545	True
Capra_hircus	NC_030810.1.tRNA5597-ProAGG	NC_030810.1	119082035	119082107	-	6	-29.5	70.2	1.416763889	2	0.044041451	0.482536765	-3.7663	1	10	active	0.984255734	True
Capra_hircus	NC_030810.1.tRNA5840-GlyGCC	NC_030810.1	113181172	113181243	-	11	-20.9	57.2	?	14	0.019455253	0.388026608	?	0	18	active	0.501325663	True
Capra_hircus	NC_030810.1.tRNA5895-LeuCAG	NC_030810.1	112110994	112111077	-	6	-32.8	77.3	0.971493976	11	0.037037037	0.799695354	-4.24	3	15	active	0.986310325	True
Capra_hircus	NC_030810.1.tRNA5896-GlyGCC	NC_030810.1	112102364	112102435	-	11	-26.4	81	1.090098592	6	0.028534371	0.782414307	-3.2438	2	18	active	0.98746304	True
Capra_hircus	NC_030810.1.tRNA5905-ValCAC	NC_030810.1	111982390	111982463	-	15	-24.7	79.4	1.070438356	10	0.058214748	0.605745933	-2.56195	0	24	active	0.98744234	True
Capra_hircus	NC_030810.1.tRNA6040-ArgTCT	NC_030810.1	109327976	109328050	-	12	-27.7	78.5	1.51627027	19	0.027131783	0.392464678	1.45095	0	12	active	0.798991025	True
Capra_hircus	NC_030810.1.tRNA6400-AsnGTT	NC_030810.1	101722710	101722784	-	22	-26.4	76.3	0.122459459	12	0.072351421	0.45751634	-0.32805	5	13	active	0.900091282	True
Capra_hircus	NC_030810.1.tRNA6401-ValCAC	NC_030810.1	101722033	101722106	-	15	-24.7	79.4	0.12209589	13	0.067270375	0.521376434	-0.52155	5	12	active	0.905336035	True
Capra_hircus	NC_030810.1.tRNA6402-GluTTC	NC_030810.1	101721464	101721536	-	38	-26.4	68.7	-0.045388889	66	0.051813472	0.6875	-0.3631	5	12	active	0.705009688	True
Capra_hircus	NC_030810.1.tRNA6405-AsnATT	NC_030810.1	101709767	101709841	-	2	-18.9	71.3	0.122459459	12	0.068475452	0.531430307	-0.32805	2	11	active	0.755545277	True
Capra_hircus	NC_030810.1.tRNA6409-GlnCTG	NC_030810.1	101679565	101679637	-	14	-24.2	67.5	-0.422430556	25	0.041450777	0.30478955	-1.153684211	3	11	active	0.693564108	True
Capra_hircus	NC_030810.1.tRNA6413-AsnGTT	NC_030810.1	101661724	101661798	-	22	-18.3	50.8	-0.329648649	0	0.032299742	0.602150538	-0.74705	1	11	active	0.511310155	True
Capra_hircus	NC_030810.1.tRNA6415-AsnGTT	NC_030810.1	101645985	101646059	-	22	-26.4	81.5	-0.051986486	11	0.050387597	0.352743561	-1.0309	2	8	active	0.709413917	True
Capra_hircus	NC_030810.1.tRNA6417-HisGTG	NC_030810.1	101641375	101641447	-	13	-25.5	60.1	0.122152778	25	0.044041451	0.983284169	0.04175	2	8	active	0.911196963	True
Capra_hircus	NC_030810.1.tRNA6418-AsnGTT	NC_030810.1	101637290	101637364	-	22	-25.7	74	0.1225	10	0.050387597	0.869565217	-0.209833333	2	8	active	0.916234726	True
Capra_hircus	NC_030810.1.tRNA6421-HisGTG	NC_030810.1	101599238	101599310	-	13	-25.5	60.1	0.122222222	30	0.063471503	0.949400104	-0.0377	3	1	active	0.893598991	True
Capra_hircus	NC_030810.1.tRNA6423-GlyCCC	NC_030810.1	101588669	101588740	-	37	-26.4	79.3	0.002521127	6	0.02464332	0.326188257	-0.71945	5	1	inactive	-0.524158261	True
Capra_hircus	NC_030810.1.tRNA6425-AsnGTT	NC_030810.1	101559287	101559354	-	22	-19.5	55.8	0.074164179	0	0.056062581	0.836320191	-0.585	1	0	active	0.581548594	True
Capra_hircus	NC_030810.1.tRNA6426-ValCAC	NC_030810.1	101515645	101515721	-	15	-16.6	63.6	0.050078947	5	0.032216495	0.439919558	-1.1942	1	0	active	0.675624199	True
Capra_hircus	NC_030810.1.tRNA6427-ValAAC	NC_030810.1	101513102	101513175	-	11	-24.7	79.4	0.027232877	7	0.040103493	0.415542364	-1.9927	2	0	active	0.916268929	True
Capra_hircus	NC_030810.1.tRNA6431-ValCAC	NC_030810.1	101439219	101439291	-	15	-21.3	59.2	0.204069444	44	0.067357513	0.701121795	-3.60665	6	1	active	0.904304941	True
Capra_hircus	NC_030810.1.tRNA6432-AsnGTT	NC_030810.1	101433443	101433517	-	22	-26.4	80.9	0.122459459	12	0.072351421	0.520214031	-0.32805	6	1	active	0.894450497	True
Capra_hircus	NC_030810.1.tRNA6434-GluTTC	NC_030810.1	101432195	101432267	-	38	-26.4	68.7	-0.045388889	66	0.045336788	0.667211329	-0.3631	6	1	active	0.710387903	True
Capra_hircus	NC_030810.1.tRNA6436-ValAAC	NC_030810.1	101418764	101418837	-	11	-24.7	79.4	0	19	0.028460543	0.424757282	0	2	7	active	0.625081741	True
Capra_hircus	NC_030810.1.tRNA6437-ValAAC	NC_030810.1	101412446	101412519	-	11	-18.9	71.7	0.077684932	19	0.018111255	0.127442651	-0.4902	2	7	inactive	-0.694985976	True
Capra_hircus	NC_030810.1.tRNA6438-GlyCCC	NC_030810.1	101398547	101398618	-	37	-26.4	79.3	-0.022457143	15	0.042801556	0.518518519	0.04085	5	8	active	0.688461129	True
Capra_hircus	NC_030810.1.tRNA6440-GlnCTG	NC_030810.1	101388694	101388766	-	14	-24.2	71.1	-0.422430556	25	0.054404145	0.403329065	-1.05385	4	8	active	0.824647684	True
Capra_hircus	NC_030810.1.tRNA6603-HisGTG	NC_030810.1	99297343	99297415	-	13	-25.5	60.1	0.363277778	15	0.031088083	0.665905632	-0.3734	2	20	active	0.906181037	True
Capra_hircus	NC_030810.1.tRNA6604-GlyCCC	NC_030810.1	99293362	99293433	-	37	-26.4	79.3	0.099591549	14	0.023346304	0.249598859	-0.0602	2	20	inactive	-0.527437689	True
Capra_hircus	NC_030810.1.tRNA6605-GluTTC	NC_030810.1	99282820	99282892	-	38	-26.4	68.7	-0.043666667	9	0.054404145	0.806318907	-1.75735	3	20	active	0.883945083	True
Capra_hircus	NC_030810.1.tRNA6607-HisGTG	NC_030810.1	99273398	99273470	-	13	-25.5	60.1	0.363277778	7	0.049222798	0.98470948	-0.66105	4	13	active	0.956966788	True
Capra_hircus	NC_030810.1.tRNA6608-AsnGTT	NC_030810.1	99264132	99264206	-	22	-24.2	76.5	0.451108108	15	0.047803618	0.748455568	-1.96235	2	13	active	0.984369746	True
Capra_hircus	NC_030810.1.tRNA6610-ValCAC	NC_030810.1	99218006	99218079	-	15	-19.1	62.7	0.189520548	330	0.067270375	0.755214577	-3.30705	1	18	active	0.788488253	True
Capra_hircus	NC_030810.1.tRNA6611-AsnGTT	NC_030810.1	99191456	99191530	-	22	-26.4	80.9	-0.030608108	5	0.03875969	0.703942076	-1.91195	3	31	active	0.932179581	True
Capra_hircus	NC_030810.1.tRNA6925-GlyCCC	NC_030810.1	93341604	93341677	-	37	-23	70.1	-0.02309589	184	0.010349288	0.211250604	0.0054	0	22	inactive	-0.966425524	True
Capra_hircus	NC_030810.1.tRNA7210-LysTTT	NC_030810.1	87866606	87866679	-	21	-28	87.4	0.122068493	13	0.002587322	0	-0.41585	0	2	inactive	-0.638553372	True
Capra_hircus	NC_030810.1.tRNA9415-GlnCTG	NC_030810.1	36818729	36818801	-	14	-19.5	55.7	-0.038041667	351	0.015544041	0.14	0	0	10	inactive	-0.974371965	True
Capra_hircus	NC_030810.1.tRNA9556-GlyCCC	NC_030810.1	33614211	33614284	-	37	-16.1	66.4	0.122287671	82	0.012936611	0.244379277	0.052	0	0	inactive	-0.890684588	True
Capra_hircus	NC_030810.1.tRNA9963-SerGGA	NC_030810.1	24996784	24996857	-	27	-13.9	62.9	?	102	0.010349288	0.069128975	-0.14	0	8	inactive	-0.902329344	True
Capra_hircus	NC_030811.1.tRNA10041-ArgCCT	NC_030811.1	17537630	17537703	-	19	-27.2	65.6	1.558479452	6	0.054333765	1.27349909	-1.2545	0	32	active	0.980226025	True
Capra_hircus	NC_030811.1.tRNA10288-ArgTCT	NC_030811.1	13318111	13318184	-	12	-16.9	56.1	0.072219178	44	0.003880983	0.163170163	-0.00115	0	9	inactive	-0.921735025	True
Capra_hircus	NC_030811.1.tRNA10559-CysGCA	NC_030811.1	8302390	8302462	-	38	-23.9	81.1	0.417291667	2	0.012953368	0.268734644	-1.0207	0	23	inactive	-0.736184624	True
Capra_hircus	NC_030811.1.tRNA10561-CysGCA	NC_030811.1	8290786	8290858	-	38	-24.6	81.8	0.424361111	9	0.015544041	0.202546296	-1.58985	3	20	inactive	-0.76101261	True
Capra_hircus	NC_030811.1.tRNA10562-CysGCA	NC_030811.1	8289484	8289556	-	38	-24.6	77.2	0.250180556	12	0.007772021	0.136363636	-1.42915	3	20	inactive	-0.885672064	True
Capra_hircus	NC_030811.1.tRNA10575-CysGCA	NC_030811.1	8155716	8155788	-	38	-24.6	77.2	0.423333333	13	0.006476684	0.12943787	-1.53395	2	30	inactive	-0.893025582	True
Capra_hircus	NC_030811.1.tRNA10576-CysGCA	NC_030811.1	8153463	8153535	-	38	-26.1	77.3	0.080708333	12	0.018134715	0.327190171	0.04	2	30	inactive	-0.647639746	True
Capra_hircus	NC_030811.1.tRNA10577-CysGCA	NC_030811.1	8150881	8150953	-	38	-24.6	77.2	0.037375	11	0.005181347	0.047195254	-1.28135	3	30	inactive	-0.911643421	True
Capra_hircus	NC_030811.1.tRNA10579-CysGCA	NC_030811.1	8142229	8142301	-	38	-24.6	74	0.678625	13	0.002590674	0.090415913	-1.0479	3	29	inactive	-0.884834588	True
Capra_hircus	NC_030811.1.tRNA10580-CysGCA	NC_030811.1	8138095	8138167	-	38	-21.6	74.7	0.232013889	2	0.006476684	0.099206349	-1.69005	2	28	inactive	-0.824459191	True
Capra_hircus	NC_030811.1.tRNA10582-CysGCA	NC_030811.1	8115966	8116038	-	38	-24.6	77.2	0.443319444	12	0.006476684	0.150667241	-0.8245	2	46	inactive	-0.936959549	True
Capra_hircus	NC_030811.1.tRNA10596-CysGCA	NC_030811.1	7937945	7938017	-	38	-26.1	77.3	0.384541667	5	0.010362694	0.249465431	-1.7138	1	78	inactive	-0.821014593	True
Capra_hircus	NC_030811.1.tRNA2251-SerGGA	NC_030811.1	41604295	41604368	+	27	-13.9	62.9	-0.063164179	181	0.009055627	0.087851406	-0.26875	0	0	inactive	-0.912046631	True
Capra_hircus	NC_030811.1.tRNA2622-CysGCA	NC_030811.1	50092998	50093071	+	38	-13.4	60.9	-0.076671233	138	0.009055627	0.111607143	-0.0648	0	1	inactive	-0.918898453	True
Capra_hircus	NC_030811.1.tRNA389-CysGCA	NC_030811.1	7941416	7941488	+	38	-24.6	77.2	0.459236111	12	0.006476684	0.145631068	-0.8196	1	83	inactive	-0.934410827	True
Capra_hircus	NC_030811.1.tRNA399-CysGCA	NC_030811.1	8120403	8120475	+	38	-26.1	77.3	0.423972222	5	0.009067358	0.124069479	-1.8501	2	38	inactive	-0.852549695	True
Capra_hircus	NC_030811.1.tRNA400-CysGCA	NC_030811.1	8125311	8125383	+	38	-23.9	77.1	0.463055556	41	0.016839378	0.373134328	-1.54755	3	33	inactive	-0.681349438	True
Capra_hircus	NC_030811.1.tRNA402-CysGCA	NC_030811.1	8135161	8135232	+	38	-23.4	60.4	0.339507042	11	0.019455253	0.267814443	-0.867	3	27	inactive	-0.54203252	True
Capra_hircus	NC_030811.1.tRNA410-CysGCA	NC_030811.1	8256695	8256767	+	38	-22.8	68.1	0.310097222	12	0.018134715	0.39161835	-2.2023	1	19	active	0.532533507	True
Capra_hircus	NC_030811.1.tRNA412-CysGCA	NC_030811.1	8262711	8262783	+	38	-26.1	77.3	0.099958333	351	0.010362694	0.220588235	-0.20235	2	18	inactive	-0.92259467	True
Capra_hircus	NC_030811.1.tRNA414-CysGCA	NC_030811.1	8269015	8269087	+	38	-24.6	72.7	0.385958333	17	0.00388601	0	-2.2993	1	21	inactive	-0.884896173	True
Capra_hircus	NC_030811.1.tRNA415-CysGCA	NC_030811.1	8281633	8281705	+	38	-23.9	81.1	0.07375	12	0.007772021	0.132275132	-2.3851	3	22	inactive	-0.694828826	True
Capra_hircus	NC_030811.1.tRNA416-CysGCA	NC_030811.1	8284493	8284565	+	38	-19.5	58.9	0.634680556	4	0.014248705	0.178062678	-1.5232	3	20	inactive	-0.840607257	True
Capra_hircus	NC_030811.1.tRNA660-SerGGA	NC_030811.1	12288261	12288334	+	27	-18.4	57.4	?	170	0.016817594	0.141129032	?	0	0	inactive	-0.83271371	True
Capra_hircus	NC_030811.1.tRNA6870-SupTCA	NC_030811.1	88112836	88112909	-	5	-22.9	60	-0.058013699	57	0.012936611	0.236742424	0.0847	0	25	inactive	-0.891386549	True
Capra_hircus	NC_030811.1.tRNA709-ValAAC	NC_030811.1	13415312	13415385	+	11	-23.2	79.3	0.099849315	19	0.01164295	0	-0.1587	0	8	inactive	-0.834473542	True
Capra_hircus	NC_030811.1.tRNA7453-GlyTCC	NC_030811.1	73509084	73509157	-	20	-22.1	59.2	0.078383562	351	0.015523933	0.05787037	-0.0633	0	9	inactive	-0.920362001	True
Capra_hircus	NC_030811.1.tRNA7782-TrpCCA	NC_030811.1	64908452	64908524	-	40	-21.1	64.4	-0.064972222	138	0.012953368	0	-0.342625	0	7	inactive	-0.951674012	True
Capra_hircus	NC_030811.1.tRNA9469-ProAGG	NC_030811.1	27381469	27381541	-	6	-29.5	70.2	1.361958333	2	0.018134715	0.126502214	-1.52835	0	89	active	0.761752288	True
Capra_hircus	NC_030811.1.tRNA9538-TrpCCA	NC_030811.1	26293070	26293143	-	40	-18.3	50.2	?	54	0.005174644	0	-0.1394	0	21	inactive	-0.901901887	True
Capra_hircus	NC_030811.1.tRNA9865-GlnCTG	NC_030811.1	20560025	20560097	-	14	-19.7	61.3	0.099236111	6	0.012953368	0.343137255	-0.53715	0	1	inactive	-0.76050018	True
Capra_hircus	NC_030812.1.tRNA10438-LysTTT	NC_030812.1	45886927	45886999	-	21	-17.8	53.4	0.0995	199	0.006476684	0.12345679	-0.0453	0	17	inactive	-0.899625494	True
Capra_hircus	NC_030812.1.tRNA10763-GlnCTG	NC_030812.1	38902106	38902179	-	14	-18.3	51	0.052054795	173	0.010349288	0.40174472	-0.20505	0	0	inactive	-0.781141211	True
Capra_hircus	NC_030812.1.tRNA10922-SerGGA	NC_030812.1	34495170	34495242	-	27	-18.3	63.1	0	287	0.010362694	0.166165533	-0.1553	0	20	inactive	-0.963755627	True
Capra_hircus	NC_030812.1.tRNA11171-UndetNNN	NC_030812.1	29400726	29400799	-	4	-23	51.2	0.070369863	24	0.006468305	0.211778943	0.03	0	58	inactive	-0.866561851	True
Capra_hircus	NC_030812.1.tRNA11672-TrpCCA	NC_030812.1	20069663	20069736	-	40	-13.7	53.1	?	311	0.007761966	0	-0.303666667	0	0	inactive	-0.893252585	True
Capra_hircus	NC_030812.1.tRNA1205-GluTTC	NC_030812.1	27913404	27913477	+	38	-26.9	73.6	0.033575342	293	0.002587322	0.103427896	0.1026	0	6	inactive	-0.894272367	True
Capra_hircus	NC_030812.1.tRNA1228-ArgCCT	NC_030812.1	28240015	28240088	+	19	-24.3	63.8	0.050589041	70	0.012936611	0.242005186	0.12155	0	34	inactive	-0.870324414	True
Capra_hircus	NC_030812.1.tRNA2473-SupCTA	NC_030812.1	53716501	53716574	+	3	-18.5	55	-0.045369863	351	0.007761966	0.549278092	0.15005	0	0	inactive	-0.768480564	True
Capra_hircus	NC_030812.1.tRNA2743-AspGTC	NC_030812.1	59020828	59020900	+	13	-26.4	66.5	1.541722222	9	0.022020725	0.318761384	-3.00635	0	44	active	0.844994101	True
Capra_hircus	NC_030812.1.tRNA2860-AspGTC	NC_030812.1	61392699	61392771	+	13	-26.4	65.4	1.036833333	12	0.03238342	0.416666667	-4.3035	1	19	active	0.96349055	True
Capra_hircus	NC_030812.1.tRNA2861-TrpCCA	NC_030812.1	61393390	61393462	+	40	-25.1	74.3	1.576777778	5	0.044041451	0.772285966	0.47705	1	19	active	0.915142615	True
Capra_hircus	NC_030812.1.tRNA3219-ArgTCT	NC_030812.1	68033456	68033529	+	12	-19.9	53.7	0.03069863	75	0.010349288	0.227198961	-0.25005	0	0	inactive	-0.911228846	True
Capra_hircus	NC_030812.1.tRNA4549-ArgCCT	NC_030812.1	92002972	92003044	+	19	-22.6	63.7	0.054819444	51	0	0	0.04065	0	2	inactive	-0.888304107	True
Capra_hircus	NC_030812.1.tRNA5548-GlnCTG	NC_030812.1	105749379	105749452	+	14	-29	56.5	0.099849315	278	0.014230272	0.352964905	-0.05225	0	40	inactive	-0.703376361	True
Capra_hircus	NC_030812.1.tRNA6209-AspGTC	NC_030812.1	115425725	115425798	+	13	-19.7	56.4	-0.007328767	61	0.023285899	0.313620072	-0.04545	0	29	inactive	-0.812824875	True
Capra_hircus	NC_030812.1.tRNA6469-GlyCCC	NC_030812.1	114907099	114907172	-	37	-17.9	63	0.004315068	351	0.023285899	0.352427836	-0.3424	0	19	inactive	-0.816025256	True
Capra_hircus	NC_030812.1.tRNA6946-MetCAT	NC_030812.1	106677339	106677412	-	11	-21.3	56.6	0.039945205	229	0.016817594	0.258971513	-0.0584	0	41	inactive	-0.88981239	True
Capra_hircus	NC_030812.1.tRNA7029-GlyCCC	NC_030812.1	105682159	105682232	-	37	-19.5	63.1	0.045561644	126	0.007761966	0.17921147	-0.10295	0	14	inactive	-0.955463745	True
Capra_hircus	NC_030812.1.tRNA719-ArgTCT	NC_030812.1	17946881	17946954	+	12	-19.6	56.4	-0.008424658	198	0.007761966	0.382653061	-0.6988	0	0	inactive	-0.909916948	True
Capra_hircus	NC_030812.1.tRNA72-TrpCCA	NC_030812.1	1842274	1842347	+	40	-18.3	50.2	0	84	0.010349288	0.230414747	-0.1483	0	1	inactive	-0.907257986	True
Capra_hircus	NC_030812.1.tRNA759-LysTTT	NC_030812.1	18931312	18931385	+	21	-16.2	63.9	0.099630137	220	0.005174644	0.261437908	0.1206	0	3	inactive	-0.834767848	True
Capra_hircus	NC_030812.1.tRNA7608-SupTCA	NC_030812.1	97286894	97286967	-	5	-15.5	59	?	156	0.003880983	0.086848635	-0.5045	0	18	inactive	-0.879985553	True
Capra_hircus	NC_030812.1.tRNA8058-SerGGA	NC_030812.1	90997292	90997365	-	27	-13.9	62.2	?	190	0.001293661	0	-0.1945	0	0	inactive	-0.888365227	True
Capra_hircus	NC_030812.1.tRNA8374-LysTTT	NC_030812.1	85799763	85799836	-	21	-26.3	76.8	0.05409589	351	0.002587322	0	-0.3818	0	0	inactive	-0.907165557	True
Capra_hircus	NC_030812.1.tRNA88-IleGAT	NC_030812.1	2236250	2236324	+	1	-16.5	52.2	-0.022837838	80	0.00129199	0	-0.03995	0	3	inactive	-0.906832885	True
Capra_hircus	NC_030812.1.tRNA8921-TrpCCA	NC_030812.1	75126617	75126689	-	40	-19.5	63.5	?	165	0.002590674	0	-0.2966	0	3	inactive	-0.918175979	True
Capra_hircus	NC_030812.1.tRNA8982-GluTTC	NC_030812.1	73640899	73640971	-	38	-16.2	64	-0.054027778	292	0.012953368	0.192307692	-0.00855	0	31	inactive	-0.963840291	True
Capra_hircus	NC_030812.1.tRNA9066-ArgCCT	NC_030812.1	71961994	71962067	-	19	-21.1	55.7	0.011739726	34	0.016817594	0.197183099	-0.04115	0	0	inactive	-0.885996373	True
Capra_hircus	NC_030812.1.tRNA9353-AlaTGC	NC_030812.1	66583604	66583676	-	13	-25.5	74.8	0.250652778	52	0.002590674	0	-0.3499	0	22	inactive	-0.862443514	True
Capra_hircus	NC_030812.1.tRNA9862-SerCGA	NC_030812.1	56514834	56514916	-	2	-29.8	89.6	1.5265	5	0.04859335	0.609867938	-0.7818	0	168	active	0.926835589	True
Capra_hircus	NC_030813.1.tRNA1768-AlaTGC	NC_030813.1	45853758	45853833	+	13	-19.1	57.6	0.100733333	351	0.009032258	0.042735043	-0.3555	0	7	inactive	-0.911576147	True
Capra_hircus	NC_030813.1.tRNA222-GluTTC	NC_030813.1	6858722	6858795	+	38	-24.5	72.9	0.083410959	309	0.006468305	0.128960943	0.242684211	0	4	inactive	-0.923779061	True
Capra_hircus	NC_030813.1.tRNA2606-TrpCCA	NC_030813.1	65690780	65690852	+	40	-21.5	66.2	-0.016736111	138	0.009067358	0	-0.90285	0	1	inactive	-0.927135947	True
Capra_hircus	NC_030813.1.tRNA2649-AlaAGC	NC_030813.1	66489814	66489885	+	12	-17.1	60.3	0	2	0.011673152	0.213414634	?	0	1	inactive	-0.851560907	True
Capra_hircus	NC_030813.1.tRNA3535-CysGCA	NC_030813.1	86556675	86556748	+	38	-13.9	62.2	-0.022	351	0.01164295	0.081699346	-0.0475	0	27	inactive	-0.946878204	True
Capra_hircus	NC_030813.1.tRNA3915-AlaTGC	NC_030813.1	92205336	92205408	+	13	-24.8	74.4	0.054652778	2	0.010362694	0.158084914	-0.1935	0	5	inactive	-0.826144354	True
Capra_hircus	NC_030813.1.tRNA4931-TyrGTA	NC_030813.1	107556690	107556780	+	16	-20.9	51.1	-0.046013699	12	0.013924051	0.092592593	-0.52515	0	0	inactive	-0.895917643	True
Capra_hircus	NC_030813.1.tRNA6151-AlaTGC	NC_030813.1	106345337	106345409	-	13	-25	78.2	0.040513889	54	0.002590674	0	-0.500272727	0	0	inactive	-0.875008847	True
Capra_hircus	NC_030813.1.tRNA6321-ThrTGT	NC_030813.1	103640607	103640680	-	9	-22.5	52.3	0.044287671	56	0.007761966	0	-0.1911	0	2	inactive	-0.873183454	True
Capra_hircus	NC_030813.1.tRNA6817-TrpCCA	NC_030813.1	97078681	97078754	-	40	-19.9	58.4	-0.017643836	77	0.009055627	0.139553429	0.0512	0	2	inactive	-0.944003884	True
Capra_hircus	NC_030813.1.tRNA8681-GlyGCC	NC_030813.1	59860800	59860871	-	11	-17.1	62.7	0.06884507	10	0.010376135	0.386029412	0.1211	0	8	inactive	-0.784180469	True
Capra_hircus	NC_030813.1.tRNA8764-IleAAT	NC_030813.1	58471434	58471508	-	5	-14.4	69.3	0.001581081	276	0.014211886	0.222222222	-0.47105	0	8	inactive	-0.909233605	True
Capra_hircus	NC_030813.1.tRNA9636-AlaCGC	NC_030813.1	37650710	37650782	-	3	-26.5	79.7	0.094236111	69	0.015544041	0.221518987	-0.253	0	25	inactive	-0.713875236	True
Capra_hircus	NC_030814.1.tRNA10690-TrpCCA	NC_030814.1	2586767	2586840	-	40	-12.2	60.4	?	149	0.016817594	0.242130751	-0.3846	0	6	inactive	-0.837882678	True
Capra_hircus	NC_030814.1.tRNA1723-SerGGA	NC_030814.1	37412769	37412841	+	27	-20	65.8	0	267	0.010362694	0	0.05425	0	1	inactive	-0.920914764	True
Capra_hircus	NC_030814.1.tRNA2930-PheGAA	NC_030814.1	66676667	66676740	+	12	-21.9	88.9	0.449315068	4	0.075032342	1.078539823	-0.80555	1	76	active	0.969071769	True
Capra_hircus	NC_030814.1.tRNA3074-ValCAC	NC_030814.1	70228247	70228320	+	15	-24.7	79.4	1.339657534	8	0.047865459	0.678294574	-3.29175	2	34	active	0.988798958	True
Capra_hircus	NC_030814.1.tRNA3075-LysCTT	NC_030814.1	70228738	70228811	+	14	-28	87.8	0.180808219	8	0.03622251	0.429623568	-3.60305	2	34	active	0.970932868	True
Capra_hircus	NC_030814.1.tRNA3076-ValAAC	NC_030814.1	70234107	70234180	+	11	-24.7	79.4	0.614082192	16	0.032341527	0.464622328	-3.76095	4	34	active	0.988020914	True
Capra_hircus	NC_030814.1.tRNA3077-ThrTGT	NC_030814.1	70263374	70263447	+	9	-29.7	78.8	1.458013699	7	0.068564036	0.854961832	-3.9384	1	27	active	0.987808491	True
Capra_hircus	NC_030814.1.tRNA3109-LysCTT	NC_030814.1	70946339	70946412	+	14	-24.5	58.3	-0.043630137	114	0.006468305	0	0.1202	0	16	inactive	-0.920743038	True
Capra_hircus	NC_030814.1.tRNA3956-GlyCCC	NC_030814.1	89266961	89267033	+	37	-22.7	70.8	0.069902778	98	0.015544041	0.317124736	-0.2589	0	54	inactive	-0.89724476	True
Capra_hircus	NC_030814.1.tRNA4127-GlyTCC	NC_030814.1	91118754	91118826	+	20	-25.1	73.8	0.919652778	8	0.064766839	0.847578348	-4.30855	0	33	active	0.986869226	True
Capra_hircus	NC_030814.1.tRNA4546-GlyCCC	NC_030814.1	95452215	95452288	+	37	-17.8	63.4	0.086164384	351	0.010349288	0.057377049	-0.25195	0	93	inactive	-0.923096763	True
Capra_hircus	NC_030814.1.tRNA4997-iMetCAT	NC_030814.1	101205898	101205970	+	11	-26.1	60.4	?	4	0.011658031	0	-0.8455	0	58	inactive	-0.779859961	True
Capra_hircus	NC_030814.1.tRNA5114-LysCTT	NC_030814.1	102959068	102959141	+	14	-15.4	55	-0.154986301	197	0.012936611	0.296538368	-0.33585	0	123	inactive	-0.905924299	True
Capra_hircus	NC_030814.1.tRNA5648-GluTTC	NC_030814.1	103209699	103209771	-	38	-18.6	56	-0.153652778	163	0.009067358	0.113378685	-0.1357	0	72	inactive	-0.925468713	True
Capra_hircus	NC_030814.1.tRNA5989-ArgCCT	NC_030814.1	98007823	98007896	-	19	-23.3	62.6	0.07209589	351	0.009055627	0.161887142	-0.039	0	92	inactive	-0.941342537	True
Capra_hircus	NC_030814.1.tRNA6565-LysTTT	NC_030814.1	91847516	91847589	-	21	-16.7	67.4	0.033342466	351	0.010349288	0.441083806	0.12125	0	94	inactive	-0.750926149	True
Capra_hircus	NC_030814.1.tRNA6716-SupCTA	NC_030814.1	90272335	90272408	-	3	-21.2	60.5	-0.212041096	351	0.021992238	0.574494949	-0.27235	0	84	inactive	-0.634391373	True
Capra_hircus	NC_030814.1.tRNA6917-GlnTTG	NC_030814.1	86166733	86166805	-	5	-21.3	60.9	-0.091708333	132	0.007772021	0.182070401	-0.1223	0	14	inactive	-0.922161768	True
Capra_hircus	NC_030814.1.tRNA7160-ArgCCT	NC_030814.1	80087312	80087385	-	19	-18.6	61.4	0.071315068	94	0.007761966	0.15	0.01235	0	3	inactive	-0.891540652	True
Capra_hircus	NC_030814.1.tRNA7625-LeuAAG	NC_030814.1	70267891	70267973	-	4	-30.7	74.8	-0.188487805	13	0.039641944	0.747292969	-3.4868	1	28	active	0.923620256	True
Capra_hircus	NC_030814.1.tRNA7626-AlaTGC	NC_030814.1	70242256	70242328	-	13	-26.5	79.7	1.266472222	17	0.042746114	0.602755454	-4.08955	2	35	active	0.988989434	True
Capra_hircus	NC_030814.1.tRNA7627-LysCTT	NC_030814.1	70241719	70241792	-	14	-28	87.8	0.989219178	9	0.037516171	0.704334365	-2.7893	2	35	active	0.987640493	True
Capra_hircus	NC_030814.1.tRNA7730-LeuCAA	NC_030814.1	67819290	67819396	-	2	-37.5	75.6	0.8715	6	0.060794045	0.587686567	-2.02095	1	33	active	0.90663351	True
Capra_hircus	NC_030814.1.tRNA7731-GluCTC	NC_030814.1	67818936	67819008	-	11	-26.4	73.2	0.903777778	6	0.049222798	0.994318182	-2.51885	1	33	active	0.986846887	True
Capra_hircus	NC_030814.1.tRNA7779-AsnGTT	NC_030814.1	66676461	66676535	-	22	-26.4	80.9	0.886959459	11	0.095607235	0.940860215	-2.08565	1	76	active	0.983655919	True
Capra_hircus	NC_030814.1.tRNA8421-AlaAGC	NC_030814.1	51587760	51587832	-	12	-19	74.4	0.004152778	351	0.010362694	0.262762763	-0.0535	0	21	inactive	-0.918786719	True
Capra_hircus	NC_030814.1.tRNA8619-CysGCA	NC_030814.1	47763503	47763576	-	38	-13.9	62.2	0.004219178	351	0.015523933	0.24386845	-0.17835	0	30	inactive	-0.937546051	True
Capra_hircus	NC_030815.1.tRNA1352-HisGTG	NC_030815.1	29611296	29611368	+	13	-25.5	60.1	0.88975	14	0.023316062	0.290516705	-0.21185	0	2	active	0.608111448	True
Capra_hircus	NC_030815.1.tRNA1528-TrpCCA	NC_030815.1	35341444	35341517	+	40	-13.9	62.9	0	254	0.01164295	0.101744186	-1.0737	0	1	inactive	-0.912407752	True
Capra_hircus	NC_030815.1.tRNA2316-GluCTC	NC_030815.1	57280676	57280749	+	11	-23.7	61.8	-0.095027397	56	0.001293661	0.066934404	-0.2934	0	12	inactive	-0.905185734	True
Capra_hircus	NC_030815.1.tRNA3112-TrpCCA	NC_030815.1	72918856	72918928	+	40	-21	64.9	0	191	0.024611399	0.533943555	-0.16655	0	9	inactive	-0.591233428	True
Capra_hircus	NC_030815.1.tRNA6570-AlaAGC	NC_030815.1	80360650	80360723	-	12	-16.7	54.7	-0.070534247	47	0.002587322	0.225008036	-0.8114	0	0	inactive	-0.927641079	True
Capra_hircus	NC_030815.1.tRNA7165-AsnGTT	NC_030815.1	70726844	70726917	-	22	-22.7	61.1	0.077808219	158	0.006468305	0.164705882	-0.0037	0	2	inactive	-0.919046061	True
Capra_hircus	NC_030815.1.tRNA7414-CysGCA	NC_030815.1	67241124	67241196	-	38	-20.2	64.1	-0.288763889	351	0.016839378	0.13368984	-0.5704	0	2	inactive	-0.869301501	True
Capra_hircus	NC_030815.1.tRNA7425-GluCTC	NC_030815.1	67130934	67131007	-	11	-18.6	61	-0.005356164	119	0.010349288	0.1421416	-0.4203	0	0	inactive	-0.906322615	True
Capra_hircus	NC_030815.1.tRNA7759-AsnATT	NC_030815.1	60355423	60355496	-	2	-15.2	56	-0.113835616	219	0.002587322	0.095706864	-0.0825	0	14	inactive	-0.922385647	True
Capra_hircus	NC_030815.1.tRNA7961-SerGGA	NC_030815.1	55067288	55067361	-	27	-13.9	58.1	?	236	0.010349288	0.134615385	-0.146333333	0	0	inactive	-0.902583409	True
Capra_hircus	NC_030816.1.tRNA1144-SerGGA	NC_030816.1	23016609	23016681	+	27	-19.4	60.6	0	235	0.007772021	0	-0.0745	0	0	inactive	-0.9202653	True
Capra_hircus	NC_030816.1.tRNA1420-LeuCAA	NC_030816.1	29349548	29349630	+	2	-27.4	64.2	0.037926829	351	0.001278772	0.073902027	-0.08855	0	8	inactive	-0.806830511	True
Capra_hircus	NC_030816.1.tRNA2086-TrpCCA	NC_030816.1	46649956	46650029	+	40	-12.5	55	0	247	0.010349288	0.237569998	0.06855	0	2	inactive	-0.924636027	True
Capra_hircus	NC_030816.1.tRNA209-AlaTGC	NC_030816.1	4474717	4474789	+	13	-25.4	73.9	-0.294083333	26	0.006476684	0.065031587	-0.7143	0	2	inactive	-0.845966549	True
Capra_hircus	NC_030816.1.tRNA2897-MetCAT	NC_030816.1	62641951	62642024	+	11	-18.4	57.3	-0.002178082	213	0.005174644	0.096711799	-0.0404	0	0	inactive	-0.928037458	True
Capra_hircus	NC_030816.1.tRNA3243-LeuTAA	NC_030816.1	68644713	68644796	+	2	-32.3	88.1	1.249710843	6	0.106002554	1.158068883	-1.00535	0	8	active	0.888818743	True
Capra_hircus	NC_030816.1.tRNA481-AlaTGC	NC_030816.1	9950224	9950297	+	13	-20.1	58.7	0.006246575	155	0.009055627	0.241545894	-0.1409	0	0	inactive	-0.912621687	True
Capra_hircus	NC_030816.1.tRNA5067-GluTTC	NC_030816.1	82474334	82474407	-	38	-22.7	61.4	-0.020479452	351	0.02457956	0.233957219	-0.9815	0	26	inactive	-0.700111606	True
Capra_hircus	NC_030816.1.tRNA5106-TrpCCA	NC_030816.1	81794093	81794166	-	40	-19.6	59	0.028287671	143	0.014230272	0.374331551	-0.4181	0	23	inactive	-0.917882236	True
Capra_hircus	NC_030816.1.tRNA564-SerAGA	NC_030816.1	11267789	11267873	+	6	-22.6	65.2	0	269	0.021683673	0.240137221	-0.06025	0	12	inactive	-0.730375027	True
Capra_hircus	NC_030816.1.tRNA5930-TrpCCA	NC_030816.1	68630391	68630464	-	40	-19.5	66.3	0.028273973	43	0.005174644	0.080183276	0.1206	0	7	inactive	-0.943623222	True
Capra_hircus	NC_030816.1.tRNA644-GluCTC	NC_030816.1	12777123	12777195	+	11	-26.4	73.2	1.158333333	7	0.04015544	1.061621967	-3.4474	0	8	active	0.978093218	True
Capra_hircus	NC_030816.1.tRNA693-TrpCCA	NC_030816.1	13488205	13488278	+	40	-13.9	62.1	0	148	0.018111255	0.619469027	-0.0003	0	2	inactive	-0.631645624	True
Capra_hircus	NC_030816.1.tRNA7223-PheGAA	NC_030816.1	40870619	40870692	-	12	-20.2	75.3	?	351	0.005174644	0.09754738	0.121666667	0	2	inactive	-0.874917361	True
Capra_hircus	NC_030816.1.tRNA7233-HisGTG	NC_030816.1	40606871	40606943	-	13	-19.3	52.8	?	320	0.018134715	0.112830432	?	0	6	inactive	-0.728237717	True
Capra_hircus	NC_030816.1.tRNA7545-MetCAT	NC_030816.1	33433744	33433817	-	11	-23.3	73.5	-0.016479452	8	0.003880983	0.125718391	-0.49535	0	3	inactive	-0.855592651	True
Capra_hircus	NC_030816.1.tRNA7701-SerGGA	NC_030816.1	29954426	29954498	-	27	-19.8	65.5	?	351	0.007772021	0.213414634	0.087571429	0	3	inactive	-0.916265452	True
Capra_hircus	NC_030816.1.tRNA8628-AlaAGC	NC_030816.1	9271586	9271659	-	12	-17.8	57.5	-0.292424658	351	0.018111255	0.315552216	-0.22225	0	15	inactive	-0.844866639	True
Capra_hircus	NC_030817.1.tRNA1744-LysCTT	NC_030817.1	32681242	32681315	+	14	-30.1	88	1.243808219	9	0.029754204	0.830039526	-3.8642	0	44	active	0.986402284	True
Capra_hircus	NC_030817.1.tRNA2027-HisGTG	NC_030817.1	37952505	37952577	+	13	-25.5	60.1	1.435527778	30	0.062176166	0.917280917	-0.0151	2	69	active	0.951499689	True
Capra_hircus	NC_030817.1.tRNA3380-SerGCT	NC_030817.1	66892433	66892515	+	9	-30.7	88.4	1.551987805	8	0.046035806	0.883838384	-1.30915	0	34	active	0.98529818	True
Capra_hircus	NC_030817.1.tRNA3630-SerGGA	NC_030817.1	72617991	72618064	+	27	-13.8	59.3	-0.298273973	211	0.012936611	0	-0.0647	0	38	inactive	-0.910741131	True
Capra_hircus	NC_030817.1.tRNA3818-LeuAAG	NC_030817.1	76486731	76486813	+	4	-30.7	74.8	1.184207317	8	0.037084399	0.553972776	-2.1844	2	7	active	0.981133295	True
Capra_hircus	NC_030817.1.tRNA3819-LeuAAG	NC_030817.1	76495746	76495828	+	4	-30.7	74.8	1.184207317	5	0.051150895	0.654664484	-3.60065	4	8	active	0.982788062	True
Capra_hircus	NC_030817.1.tRNA3821-LeuTAG	NC_030817.1	76506091	76506173	+	3	-31.8	74.5	0.895963415	8	0.024296675	0.525	-3.59345	4	10	active	0.928841043	True
Capra_hircus	NC_030817.1.tRNA3822-ProTGG	NC_030817.1	76511500	76511572	+	3	-29.5	74.9	0.305236111	6	0.037564767	0.496665248	-3.65675	2	10	active	0.937845856	True
Capra_hircus	NC_030817.1.tRNA3823-ThrTGT	NC_030817.1	76559517	76559590	+	9	-30.4	78	1.375753425	20	0.037516171	0.294612795	-4.832	2	11	active	0.960712013	True
Capra_hircus	NC_030817.1.tRNA3824-TyrGTA	NC_030817.1	76560696	76560786	+	16	-32	72.6	0.898273973	11	0.034177215	0.532537453	-3.08785	2	12	active	0.985233449	True
Capra_hircus	NC_030817.1.tRNA3825-ProTGG	NC_030817.1	76561901	76561973	+	3	-29.5	70.3	1.440638889	6	0.04015544	0.436953808	-4.2576	2	13	active	0.936112654	True
Capra_hircus	NC_030817.1.tRNA3965-ArgACG	NC_030817.1	79510694	79510767	+	2	-25.4	67.6	1.504520548	14	0.041397154	0.846153846	-3.2972	0	93	active	0.936737301	True
Capra_hircus	NC_030817.1.tRNA404-LysTTT	NC_030817.1	7737380	7737453	+	21	-18.8	64.1	0.049821918	351	0.006468305	0.316455696	0.00495	0	1	inactive	-0.880523178	True
Capra_hircus	NC_030817.1.tRNA4357-TyrGTA	NC_030817.1	87078592	87078683	+	16	-27.9	69.6	0.011287671	351	0.007585335	0.16025641	-0.4818	0	13	inactive	-0.832632216	True
Capra_hircus	NC_030817.1.tRNA4441-GlnCTG	NC_030817.1	88527236	88527308	+	14	-24.7	71.5	1.469277778	13	0.042746114	0.668850669	-2.61585	0	25	active	0.987567083	True
Capra_hircus	NC_030817.1.tRNA4481-GlyTCC	NC_030817.1	89131171	89131244	+	20	-16	60.5	0.02839726	78	0.014230272	0.257731959	-0.13295	0	37	inactive	-0.881302912	True
Capra_hircus	NC_030817.1.tRNA4699-ArgTCG	NC_030817.1	92938302	92938375	+	4	-22.5	54.4	0.033849315	82	0.006468305	0.063199711	-0.02675	0	14	inactive	-0.890700914	True
Capra_hircus	NC_030817.1.tRNA505-LysCTT	NC_030817.1	10018775	10018848	+	14	-22.7	65.7	-0.016013699	351	0.01164295	0.07772596	0.12125	0	0	inactive	-0.938946805	True
Capra_hircus	NC_030817.1.tRNA5061-LysTTT	NC_030817.1	100831430	100831503	+	21	-10.7	60.3	-0.045739726	127	0.002587322	0.123239437	-0.28165	0	1	inactive	-0.907532858	True
Capra_hircus	NC_030817.1.tRNA521-LysTTT	NC_030817.1	10233911	10233984	+	21	-29.6	69	0.117178082	40	0.019404916	0.557029178	-0.5575	0	11	active	0.819046848	True
Capra_hircus	NC_030817.1.tRNA6320-LeuTAG	NC_030817.1	76538818	76538900	-	3	-32.4	76.2	0.005304878	3	0.033248082	0.540865385	-2.07445	4	13	active	0.886705516	True
Capra_hircus	NC_030817.1.tRNA6321-LeuAAG	NC_030817.1	76537192	76537274	-	4	-30.7	73.8	0.33702439	7	0.034526854	0.441919192	-1.47225	5	13	active	0.973282959	True
Capra_hircus	NC_030817.1.tRNA6322-TyrGTA	NC_030817.1	76533919	76534009	-	16	-29.3	72.6	0.056630137	14	0.024050633	0.402761795	-0.7409	5	11	active	0.748622997	True
Capra_hircus	NC_030817.1.tRNA6323-TyrGTA	NC_030817.1	76533252	76533342	-	16	-27.9	72.4	0.055561644	14	0.013924051	0.183582481	-0.1207	5	11	inactive	-0.773956758	True
Capra_hircus	NC_030817.1.tRNA6324-TyrGTA	NC_030817.1	76530480	76530571	-	16	-25	67.3	0.193232877	14	0.018963338	0.120689655	-0.2101	5	12	inactive	-0.535849798	True
Capra_hircus	NC_030817.1.tRNA6325-TyrGTA	NC_030817.1	76528665	76528755	-	16	-29.5	75.4	0.058219178	14	0.046835443	0.617732558	-0.87825	4	12	active	0.929230187	True
Capra_hircus	NC_030817.1.tRNA6327-ThrTGT	NC_030817.1	76509872	76509945	-	9	-29.7	78.8	0.217342466	41	0.033635188	0.648748842	-3.18905	2	9	active	0.968055257	True
Capra_hircus	NC_030817.1.tRNA6328-ThrTGT	NC_030817.1	76499774	76499847	-	9	-29.7	78.8	1.255712329	9	0.040103493	0.492264416	-3.7856	4	8	active	0.983904242	True
Capra_hircus	NC_030817.1.tRNA6329-ProAGG	NC_030817.1	76499374	76499446	-	6	-29.5	70.2	1.118180556	48	0.049222798	0.74484767	-4.3639	4	8	active	0.964843061	True
Capra_hircus	NC_030817.1.tRNA6330-ProAGG	NC_030817.1	76494774	76494846	-	6	-29.5	70.2	0.898305556	6	0.029792746	0.866479617	-3.5753	4	8	active	0.981535117	True
Capra_hircus	NC_030817.1.tRNA6348-ThrTGT	NC_030817.1	76091070	76091143	-	9	-30.4	78	1.340452055	20	0.033635188	0.248968559	-4.82135	0	14	active	0.932862191	True
Capra_hircus	NC_030817.1.tRNA7211-SerGGA	NC_030817.1	56348324	56348396	-	27	-20	65.8	-0.098212121	351	0.006476684	0.115740741	0.13125	0	24	inactive	-0.946159835	True
Capra_hircus	NC_030817.1.tRNA7232-GlyCCC	NC_030817.1	56041891	56041964	-	37	-20.4	60.3	0.100041096	116	0.002587322	0.071721311	-0.04895	0	7	inactive	-0.917018203	True
Capra_hircus	NC_030817.1.tRNA8065-HisGTG	NC_030817.1	37951775	37951847	-	13	-25.5	60.1	1.554083333	33	0.058290155	0.879589161	-0.2541	2	70	active	0.956631895	True
Capra_hircus	NC_030817.1.tRNA8066-HisGTG	NC_030817.1	37950211	37950283	-	13	-25.5	60.1	1.451069444	34	0.042746114	0.562442608	0.38425	2	72	active	0.947098979	True
Capra_hircus	NC_030817.1.tRNA8148-CysGCA	NC_030817.1	36180954	36181027	-	38	-15.2	60.2	0.033726027	328	0.007761966	0.103427896	-0.2285	0	20	inactive	-0.933432183	True
Capra_hircus	NC_030817.1.tRNA8211-SerGCT	NC_030817.1	35316055	35316137	-	9	-30.7	85.2	0.102512195	28	0.019181586	0.150645624	-0.1067	0	19	active	0.558816823	True
Capra_hircus	NC_030817.1.tRNA8357-GlyTCC	NC_030817.1	31837516	31837588	-	20	-18.6	55	?	10	0.011658031	0.339393939	0.120666667	0	0	inactive	-0.797032655	True
Capra_hircus	NC_030817.1.tRNA8527-CysGCA	NC_030817.1	28331688	28331760	-	38	-19.5	63.5	?	187	0.007772021	0.108695652	-0.43975	0	0	inactive	-0.913195288	True
Capra_hircus	NC_030817.1.tRNA8826-GlyCCC	NC_030817.1	22426673	22426746	-	37	-17.8	52	-0.015369863	68	0.012936611	0.209180014	-0.4139	0	22	inactive	-0.945470885	True
Capra_hircus	NC_030817.1.tRNA8834-GlyTCC	NC_030817.1	22311381	22311454	-	20	-21.5	65.4	-0.010068493	351	0.009055627	0.194013304	-0.2713	0	5	inactive	-0.940224663	True
Capra_hircus	NC_030817.1.tRNA9005-ValTAC	NC_030817.1	19176529	19176601	-	5	-21.3	59.2	-0.086611111	53	0.002590674	0.065876153	-0.2082	0	11	inactive	-0.905236069	True
Capra_hircus	NC_030817.1.tRNA9047-GluTTC	NC_030817.1	18574609	18574681	-	38	-15.5	58.6	-0.169611111	92	0.00388601	0.133511348	0.05335	0	45	inactive	-0.909652158	True
Capra_hircus	NC_030818.1.tRNA10218-AlaTGC	NC_030818.1	15938131	15938203	-	13	-20.2	55.8	-0.051611111	74	0.019430052	0.513497653	-0.44485	0	28	inactive	-0.666537232	True
Capra_hircus	NC_030818.1.tRNA1367-IleTAT	NC_030818.1	25025545	25025638	+	2	-30.2	73.2	1.373635135	6	0.085750315	0.863333333	0.18225	0	25	active	0.901451449	True
Capra_hircus	NC_030818.1.tRNA2523-GlyCCC	NC_030818.1	48176978	48177051	+	37	-19.5	66	0.094369863	351	0.007761966	0.111111111	0.1376	0	8	inactive	-0.926876885	True
Capra_hircus	NC_030818.1.tRNA3035-GlyCCC	NC_030818.1	59692039	59692112	+	37	-19.5	66.6	0.077808219	187	0.003880983	0.25107604	0.12165	0	42	inactive	-0.932950642	True
Capra_hircus	NC_030818.1.tRNA3383-SerGGA	NC_030818.1	66391356	66391429	+	27	-13.9	62.2	?	215	0.01164295	0.25	?	0	10	inactive	-0.866612008	True
Capra_hircus	NC_030818.1.tRNA5420-SerGGA	NC_030818.1	101851501	101851574	+	27	-13.2	60.1	0	192	0.009055627	0.151679307	0.10905	0	43	inactive	-0.954071268	True
Capra_hircus	NC_030818.1.tRNA5998-ArgTCT	NC_030818.1	98478384	98478475	-	12	-31.3	70.1	0.228849315	2	0.073324905	0.926315789	-2.4922	0	87	active	0.985182683	True
Capra_hircus	NC_030818.1.tRNA7486-TyrGTA	NC_030818.1	72307434	72307523	-	16	-30	77.9	1.545972603	12	0.045627376	0.593220339	-3.76415	1	76	active	0.988007484	True
Capra_hircus	NC_030818.1.tRNA7487-AlaAGC	NC_030818.1	72307012	72307085	-	12	-32	59.7	1.556726027	5	0.058214748	0.805921053	-2.6924	1	76	active	0.980590575	True
Capra_hircus	NC_030818.1.tRNA7660-GlyCCC	NC_030818.1	68279300	68279371	-	37	-31.4	75.1	1.21756338	5	0.050583658	1.142723881	-3.79105	0	38	active	0.933027045	True
Capra_hircus	NC_030818.1.tRNA7906-ValTAC	NC_030818.1	63420718	63420791	-	5	-25.3	61.9	0.046342466	72	0.010349288	0.19640853	-0.24515	0	9	inactive	-0.838175187	True
Capra_hircus	NC_030818.1.tRNA8513-GluCTC	NC_030818.1	49458294	49458367	-	11	-18.7	54.9	0.050287671	39	0.021992238	0.634057971	-0.27665	0	15	inactive	-0.619689592	True
Capra_hircus	NC_030818.1.tRNA9598-GluTTC	NC_030818.1	29109296	29109369	-	38	-27.2	70	0.042643836	35	0.009055627	0.280448718	-0.1312	0	27	inactive	-0.850423431	True
Capra_hircus	NC_030818.1.tRNA9698-AlaAGC	NC_030818.1	26807383	26807455	-	12	-22.7	53.6	0.05475	8	0.007772021	0.173295923	0.12265	0	8	inactive	-0.890004	True
Capra_hircus	NC_030819.1.tRNA1045-PheGAA	NC_030819.1	17011209	17011282	+	12	-21.9	88.9	1.010136986	9	0.069857697	0.712250712	-2.74245	0	29	active	0.986481832	True
Capra_hircus	NC_030819.1.tRNA1991-ArgCCT	NC_030819.1	38554913	38554986	+	19	-19.4	52.4	0.000589041	78	0.007761966	0.046635576	0.1389	0	6	inactive	-0.9260044	True
Capra_hircus	NC_030819.1.tRNA2430-LysTTT	NC_030819.1	51904302	51904375	+	21	-28	87.4	-0.188835616	35	0.006468305	0.185577943	-0.4155	0	0	inactive	-0.64865439	True
Capra_hircus	NC_030819.1.tRNA3237-iMetCAT	NC_030819.1	64962335	64962407	+	11	-26.1	60.4	0.493402778	11	0.012953368	0.192043896	-2.577894737	0	29	inactive	-0.650050102	True
Capra_hircus	NC_030819.1.tRNA3386-GlyTCC	NC_030819.1	66954704	66954777	+	20	-25	56.4	0.092657534	72	0.007761966	0.176544767	0.0258	0	2	inactive	-0.869164036	True
Capra_hircus	NC_030819.1.tRNA3419-ValTAC	NC_030819.1	67354796	67354869	+	5	-18.8	57.2	-0.003547945	51	0.019404916	0.440568243	-0.42865	0	23	inactive	-0.702210444	True
Capra_hircus	NC_030819.1.tRNA3642-ArgCCT	NC_030819.1	70321189	70321261	+	19	-15.5	55.6	-0.158458333	108	0.006476684	0.262526253	-0.2095	0	28	inactive	-0.884119333	True
Capra_hircus	NC_030819.1.tRNA3743-GluTTC	NC_030819.1	71451636	71451708	+	38	-26.7	71.2	1.566111111	10	0.067357513	1.05298913	-4.4466	0	16	active	0.948713685	True
Capra_hircus	NC_030819.1.tRNA4024-GluTTC	NC_030819.1	75261867	75261939	+	38	-24.8	70.4	1.471694444	11	0.106217617	0.964054538	-1.88605	0	18	active	0.951643392	True
Capra_hircus	NC_030819.1.tRNA5484-GlyTCC	NC_030819.1	65985294	65985367	-	20	-23.4	55.8	-0.020876712	351	0.012936611	0.067385445	-0.3091	0	5	inactive	-0.949644369	True
Capra_hircus	NC_030819.1.tRNA5855-GluTTC	NC_030819.1	60771100	60771172	-	38	-22.5	65.4	-0.133625	72	0.007772021	0.694444444	-0.0761	0	7	inactive	-0.598738214	True
Capra_hircus	NC_030819.1.tRNA6065-AsnGTT	NC_030819.1	56542916	56542990	-	22	-26.4	80.9	1.199797297	6	0.093023256	0.863970588	-2.04385	0	14	active	0.979853247	True
Capra_hircus	NC_030819.1.tRNA6313-GlyTCC	NC_030819.1	52877525	52877598	-	20	-24.3	70.1	0.078328767	84	0.005174644	0.213675214	0.02495	0	31	inactive	-0.897007841	True
Capra_hircus	NC_030819.1.tRNA8192-GlyCCC	NC_030819.1	9906755	9906828	-	37	-23.5	68.8	-0.017671233	70	0.01164295	0.378787879	0.12145	0	20	inactive	-0.897641273	True
Capra_hircus	NC_030820.1.tRNA151-ValTAC	NC_030820.1	4438493	4438566	+	5	-18.6	59.9	-0.153684932	29	0.005174644	0.211864407	-0.29635	0	1	inactive	-0.857146325	True
Capra_hircus	NC_030820.1.tRNA1763-TrpCCA	NC_030820.1	34704570	34704643	+	40	-23.3	60.3	-1.054283019	275	0.018111255	0.191885965	-1.61835	0	15	inactive	-0.721640808	True
Capra_hircus	NC_030820.1.tRNA2212-TrpCCA	NC_030820.1	43186015	43186087	+	40	-19.5	69.2	0.002208333	131	0.005181347	0.189959294	0.12055	0	35	inactive	-0.962808738	True
Capra_hircus	NC_030820.1.tRNA2415-TrpCCA	NC_030820.1	48514574	48514647	+	40	-13.9	57.6	0	328	0.005174644	0.137578616	0	0	0	inactive	-0.932497443	True
Capra_hircus	NC_030820.1.tRNA2482-SupTCA	NC_030820.1	50907606	50907677	+	5	-19.3	53.9	0.058140845	195	0.006485084	0.202234206	0.0428	0	65	inactive	-0.93710805	True
Capra_hircus	NC_030820.1.tRNA3161-MetCAT	NC_030820.1	64266435	64266508	+	11	-20.5	61.1	0.011684932	351	0.009055627	0.21141649	0.07415	0	51	inactive	-0.936999092	True
Capra_hircus	NC_030820.1.tRNA3258-GluTTC	NC_030820.1	65486870	65486942	+	38	-20.8	65.6	-0.147944444	351	0.018134715	0.436953808	-0.41965	0	43	inactive	-0.686921966	True
Capra_hircus	NC_030820.1.tRNA3678-TrpCCA	NC_030820.1	71759552	71759625	+	40	-25.3	51.4	-0.11569863	74	0.010349288	0.140712946	0.121	0	57	inactive	-0.870752723	True
Capra_hircus	NC_030820.1.tRNA4721-SerGCT	NC_030820.1	77562682	77562764	-	9	-30.7	88.4	0.09904878	55	0.054987212	0.766242938	-0.5072	0	21	active	0.890787769	True
Capra_hircus	NC_030820.1.tRNA6250-SerGGA	NC_030820.1	53370979	53371051	-	27	-23.2	64.4	?	323	0.015544041	0.091348036	-0.7506	0	93	inactive	-0.91376787	True
Capra_hircus	NC_030820.1.tRNA6687-TrpCCA	NC_030820.1	42365121	42365193	-	40	-21.2	67.6	?	189	0.007772021	0.102880658	-0.286666667	0	37	inactive	-0.942255862	True
Capra_hircus	NC_030820.1.tRNA7930-SerGGA	NC_030820.1	23130150	23130223	-	27	-13.9	63.2	?	37	0.015523933	0.050244042	-0.6085	0	6	inactive	-0.884183557	True
Capra_hircus	NC_030820.1.tRNA7955-AsnGTT	NC_030820.1	22754842	22754916	-	22	-26.4	80.9	1.371540541	8	0.072351421	0.882352941	-3.4411	0	1	active	0.974780554	True
Capra_hircus	NC_030820.1.tRNA8461-GlyTCC	NC_030820.1	13447898	13447970	-	20	-18.1	53.1	?	11	0.010362694	0.198920148	0.205583333	0	0	inactive	-0.881960231	True
Capra_hircus	NC_030820.1.tRNA8916-PheGAA	NC_030820.1	3199498	3199571	-	12	-14.8	60.9	?	187	0.009055627	0.145833333	-0.205	0	7	inactive	-0.917019197	True
Capra_hircus	NC_030821.1.tRNA1576-TrpCCA	NC_030821.1	32675899	32675972	+	40	-13.9	63.2	0	227	0.005174644	0	0.0777	0	0	inactive	-0.920195878	True
Capra_hircus	NC_030821.1.tRNA2494-GlyCCC	NC_030821.1	48411783	48411856	+	37	-27	64.7	0.122328767	85	0.007761966	0.115226337	-0.11575	0	1	inactive	-0.891906171	True
Capra_hircus	NC_030821.1.tRNA2666-ArgCCT	NC_030821.1	51191278	51191351	+	19	-20	58.6	0.055547945	104	0.005174644	0	-0.1046	0	6	inactive	-0.915351339	True
Capra_hircus	NC_030821.1.tRNA3377-MetCAT	NC_030821.1	63578385	63578458	+	11	-24.4	73.5	0.235958904	6	0.001293661	0.072553897	-1.25305	0	0	inactive	-0.784303688	True
Capra_hircus	NC_030821.1.tRNA3486-UndetNNN	NC_030821.1	65482056	65482129	+	4	-16.2	55.9	-0.00530137	126	0.005174644	0.334768054	0.1834	0	38	inactive	-0.906671973	True
Capra_hircus	NC_030821.1.tRNA534-SerAGA	NC_030821.1	10749659	10749741	+	6	-27.2	62.2	?	279	0.017902813	0.176767677	-0.656555556	0	2	inactive	-0.64647102	True
Capra_hircus	NC_030821.1.tRNA5997-MetCAT	NC_030821.1	65402563	65402636	-	11	-25	82.3	0.941986301	6	0.063389392	0.697047798	-2.11505	0	34	active	0.986233953	True
Capra_hircus	NC_030821.1.tRNA6511-GluTTC	NC_030821.1	56054795	56054867	-	38	-21.9	62.3	-0.128416667	351	0.005181347	0.091575092	0.14735	0	9	inactive	-0.938946224	True
Capra_hircus	NC_030821.1.tRNA6808-TyrGTA	NC_030821.1	51645914	51646008	-	16	-31.4	74.9	0.817657534	11	0.06675063	0.836320191	-3.0597	2	20	active	0.986162662	True
Capra_hircus	NC_030821.1.tRNA6809-TyrGTA	NC_030821.1	51645342	51645431	-	16	-31.7	75.5	1.146876712	11	0.063371356	0.962541489	-3.73895	2	20	active	0.987022012	True
Capra_hircus	NC_030821.1.tRNA6810-AlaAGC	NC_030821.1	51645136	51645209	-	12	-32	59.7	1.561972603	1	0.04915912	0.892401836	-1.24355	2	20	active	0.978721873	True
Capra_hircus	NC_030821.1.tRNA8428-AlaTGC	NC_030821.1	21140059	21140132	-	13	-20.3	60.7	-0.044068493	128	0.010349288	0.204081633	-0.11435	0	19	inactive	-0.955078354	True
Capra_hircus	NC_030821.1.tRNA850-SerGGA	NC_030821.1	17260540	17260613	+	27	-12.2	60.2	-0.016232877	190	0.009055627	0.218023256	0.12115	0	6	inactive	-0.930337843	True
Capra_hircus	NC_030821.1.tRNA8902-SerAGA	NC_030821.1	13155028	13155110	-	6	-32.8	89.6	1.264146341	11	0.058823529	0.497159091	-0.880529412	0	6	active	0.976490654	True
Capra_hircus	NC_030822.1.tRNA1041-GluTTC	NC_030822.1	18825701	18825773	+	38	-13.4	59.9	-0.012680556	190	0.006476684	0.105389943	0.0248	0	2	inactive	-0.921787647	True
Capra_hircus	NC_030822.1.tRNA1124-LysCTT	NC_030822.1	20278540	20278627	+	14	-19.6	56.7	0.033862069	4	0.008894536	0.263951735	0.04065	0	14	inactive	-0.840825453	True
Capra_hircus	NC_030822.1.tRNA1474-ProTGG	NC_030822.1	27272531	27272603	+	3	-28.9	70.5	1.500152778	3	0.080310881	1.010225961	-4.4629	1	8	active	0.912806163	True
Capra_hircus	NC_030822.1.tRNA1544-GlyCCC	NC_030822.1	29170144	29170217	+	37	-25	63.4	0.069027397	209	0.003880983	0.108225108	0.0093	0	21	inactive	-0.939206044	True
Capra_hircus	NC_030822.1.tRNA1757-IleAAT	NC_030822.1	33149320	33149394	+	5	-22	55	-0.072675676	7	0.002583979	0	0.03985	0	17	inactive	-0.890377075	True
Capra_hircus	NC_030822.1.tRNA2722-GlyCCC	NC_030822.1	52605906	52605979	+	37	-25.1	55.8	0.011849315	108	0.005174644	0.107924761	-0.073	0	97	inactive	-0.915915914	True
Capra_hircus	NC_030822.1.tRNA291-TrpCCA	NC_030822.1	5292286	5292359	+	40	-13.2	59	0.011561644	351	0.019404916	0.111146396	0.03695	0	0	inactive	-0.836712202	True
Capra_hircus	NC_030822.1.tRNA3326-SerGGA	NC_030822.1	66338961	66339034	+	27	-17.7	54.1	0	199	0.01164295	0.109529025	-0.2485	0	11	inactive	-0.94545168	True
Capra_hircus	NC_030822.1.tRNA38-PheGAA	NC_030822.1	731196	731269	+	12	-21.9	87.9	0.200082192	4	0.015523933	0.122078828	-4.24305	3	37	active	0.542401331	True
Capra_hircus	NC_030822.1.tRNA3869-GlyTCC	NC_030822.1	81215420	81215491	+	20	-14.3	54.6	0.022746479	260	0.005188067	0.160845588	-0.00715	0	11	inactive	-0.938737158	True
Capra_hircus	NC_030822.1.tRNA39-LysTTT	NC_030822.1	735866	735939	+	21	-27.5	87.8	1.219452055	10	0.130659767	0.947995666	-4.17325	6	33	active	0.946900934	True
Capra_hircus	NC_030822.1.tRNA40-PheGAA	NC_030822.1	736665	736738	+	12	-21.9	87.9	1.120890411	4	0.068564036	1.044354839	-3.14885	6	31	active	0.986591318	True
Capra_hircus	NC_030822.1.tRNA41-ValTAC	NC_030822.1	743236	743309	+	5	-23.6	80.5	1.069123288	19	0.12160414	0.923361034	-3.0874	5	27	active	0.944015133	True
Capra_hircus	NC_030822.1.tRNA432-GluTTC	NC_030822.1	7979150	7979224	+	38	-19	58.8	-0.084418919	138	0.016795866	0	-0.18395	0	17	inactive	-0.949985522	True
Capra_hircus	NC_030822.1.tRNA5715-TrpCCA	NC_030822.1	40417996	40418069	-	40	-23.9	55.3	0.033876712	119	0.006468305	0.066692073	0.03925	0	52	inactive	-0.932300816	True
Capra_hircus	NC_030822.1.tRNA6134-GlyCCC	NC_030822.1	31618520	31618593	-	37	-23.4	72	-0.010246575	351	0.009055627	0.233905101	-0.0269	0	62	inactive	-0.950030543	True
Capra_hircus	NC_030822.1.tRNA6239-GluTTC	NC_030822.1	29444269	29444341	-	38	-17.2	62.6	0.099694444	136	0.006476684	0.227125243	0.04445	0	46	inactive	-0.929367197	True
Capra_hircus	NC_030822.1.tRNA6358-ProAGG	NC_030822.1	27272809	27272881	-	6	-29.5	70.2	1.400861111	3	0.07642487	0.916573139	-4.9031	1	8	active	0.977115053	True
Capra_hircus	NC_030822.1.tRNA6710-ArgCCT	NC_030822.1	20080230	20080303	-	19	-17.4	62.9	0.078027397	99	0.006468305	0.050872093	0.13805	0	7	inactive	-0.902514941	True
Capra_hircus	NC_030822.1.tRNA6863-ValAAC	NC_030822.1	17099374	17099447	-	11	-16.4	54.5	-0.024452055	200	0.016817594	0.351506456	-0.06755	0	11	inactive	-0.873530611	True
Capra_hircus	NC_030822.1.tRNA7697-PheGAA	NC_030822.1	1425914	1425987	-	12	-16.9	73.4	-0.010958904	4	0.028460543	0.298295455	-0.12135	0	25	inactive	-0.685071242	True
Capra_hircus	NC_030822.1.tRNA7730-ArgTCT	NC_030822.1	742874	742960	-	12	-28.4	70.3	1.182205479	1	0.078880407	0.933819223	-2.6729	5	27	active	0.986811065	True
Capra_hircus	NC_030822.1.tRNA7731-LeuTAA	NC_030822.1	742404	742487	-	2	-27.9	80.8	0.055036145	13	0.049808429	0.823301508	-3.4158	5	28	active	0.889098991	True
Capra_hircus	NC_030822.1.tRNA7732-LysTTT	NC_030822.1	737578	737651	-	21	-27.5	83.4	0.89569863	7	0.016817594	0.150645624	-3.6516	6	31	active	0.550969137	True
Capra_hircus	NC_030823.1.tRNA1049-ThrTGT	NC_030823.1	24513443	24513516	+	9	-29.1	84.1	0.422767123	19	0.04915912	0.704225352	-3.2509	0	22	active	0.986489629	True
Capra_hircus	NC_030823.1.tRNA1226-ArgTCT	NC_030823.1	27497399	27497472	+	12	-19.8	60.4	-0.048547945	344	0.007761966	0.153508772	-1.1547	0	56	inactive	-0.945924352	True
Capra_hircus	NC_030823.1.tRNA1592-TyrGTA	NC_030823.1	33749345	33749418	+	16	-14.7	59	-0.032835616	261	0.005174644	0.128676471	-0.60575	0	33	inactive	-0.95384763	True
Capra_hircus	NC_030823.1.tRNA2665-SupCTA	NC_030823.1	52291026	52291098	+	3	-19.5	63.5	0.032416667	308	0.012953368	0.246247655	-0.33325	0	11	inactive	-0.883728535	True
Capra_hircus	NC_030823.1.tRNA3649-TrpCCA	NC_030823.1	69367604	69367677	+	40	-20.4	54.4	0.055712329	233	0.007761966	0.167250717	0.05945	0	28	inactive	-0.956003579	True
Capra_hircus	NC_030823.1.tRNA51-LysTTT	NC_030823.1	1630786	1630859	+	21	-27.5	87.8	0.203702703	8	0.031047865	0.608695652	-3.27845	1	46	active	0.984806331	True
Capra_hircus	NC_030823.1.tRNA6776-CysGCA	NC_030823.1	31141554	31141626	-	38	-19.8	70.9	?	247	0.012953368	0.400457666	-0.2635	0	19	inactive	-0.792279311	True
Capra_hircus	NC_030823.1.tRNA7056-AspGTC	NC_030823.1	26576817	26576889	-	13	-26.7	60	?	11	0.014248705	0.269541779	-0.066545455	0	8	inactive	-0.764663992	True
Capra_hircus	NC_030823.1.tRNA7067-LysCTT	NC_030823.1	26331345	26331414	-	14	-16.6	54.5	-0.015463768	351	0.00390117	0.080348944	0.12145	0	5	inactive	-0.954267247	True
Capra_hircus	NC_030823.1.tRNA7096-GlyCCC	NC_030823.1	25762699	25762772	-	37	-16.3	57.1	0.044109589	151	0.009055627	0.263792584	-0.04125	0	7	inactive	-0.924030579	True
Capra_hircus	NC_030823.1.tRNA7894-LysTTT	NC_030823.1	8335293	8335366	-	21	-17.8	70.4	0.099465753	202	0.003880983	0.112323492	0.01155	0	0	inactive	-0.867459524	True
Capra_hircus	NC_030823.1.tRNA8145-LysTTT	NC_030823.1	1631129	1631202	-	21	-27.5	87.8	1.298671233	6	0.063389392	1.189953937	-3.7119	1	45	active	0.98306847	True
Capra_hircus	NC_030824.1.tRNA1428-AlaTGC	NC_030824.1	20327127	20327199	+	13	-26.5	78.7	0.746861111	1	0.042746114	0.858951175	-3.3099	4	35	active	0.987687783	True
Capra_hircus	NC_030824.1.tRNA1429-ArgTCT	NC_030824.1	20345708	20345781	+	12	-20.9	54.8	-0.031643836	242	0.027166882	0.300094315	0.0624	0	35	inactive	-0.865165296	True
Capra_hircus	NC_030824.1.tRNA1461-TrpCCA	NC_030824.1	20882645	20882718	+	40	-13.4	57	0.093753425	340	0.010349288	0.198863636	-0.970421053	0	6	inactive	-0.906353989	True
Capra_hircus	NC_030824.1.tRNA2701-TrpCCA	NC_030824.1	47006246	47006319	+	40	-16	60.7	0	165	0.006468305	0.102279369	-0.56775	0	1	inactive	-0.91913487	True
Capra_hircus	NC_030824.1.tRNA4139-GlnTTG	NC_030824.1	63077063	63077136	-	5	-25.8	64.7	-0.110958904	351	0.002587322	0	-0.0342	0	4	inactive	-0.875727884	True
Capra_hircus	NC_030824.1.tRNA42-ArgCCT	NC_030824.1	1084246	1084320	+	19	-21.2	57.3	0.057567568	81	0.009043928	0.095942982	-0.31375	0	69	inactive	-0.919042524	True
Capra_hircus	NC_030824.1.tRNA4539-LysTTT	NC_030824.1	56436112	56436187	-	21	-21.7	66.1	-0.196533333	28	0.003870968	0.42042042	-0.11725	0	3	inactive	-0.647691162	True
Capra_hircus	NC_030824.1.tRNA4629-ArgCCT	NC_030824.1	54699646	54699718	-	19	-19	50.2	0.032847222	107	0.010362694	0.10989011	0.1208	0	1	inactive	-0.873169159	True
Capra_hircus	NC_030824.1.tRNA4684-GlyTCC	NC_030824.1	53894970	53895043	-	20	-21.1	65.1	-0.010328767	143	0.006468305	0.25887574	-0.2214	0	26	inactive	-0.930131656	True
Capra_hircus	NC_030824.1.tRNA4816-GluTTC	NC_030824.1	52120764	52120836	-	38	-17.9	62.7	-0.144291667	351	0.006476684	0.206185567	-0.2249	0	5	inactive	-0.922598902	True
Capra_hircus	NC_030824.1.tRNA513-GlyCCC	NC_030824.1	8750064	8750137	+	37	-19.3	69.1	-0.010479452	106	0.002587322	0.070592981	0.11465	0	17	inactive	-0.951324375	True
Capra_hircus	NC_030824.1.tRNA5906-TrpCCA	NC_030824.1	24983072	24983145	-	40	-15	57.9	0.122136986	105	0.009055627	0.129040187	-0.5286	0	14	inactive	-0.919292232	True
Capra_hircus	NC_030824.1.tRNA6309-AspGTC	NC_030824.1	20326793	20326865	-	13	-26.4	66.5	0.733027778	12	0.03626943	0.631944444	-2.7356	4	35	active	0.98763689	True
Capra_hircus	NC_030824.1.tRNA6310-PheGAA	NC_030824.1	20324486	20324559	-	12	-21.9	88.9	1.272260274	6	0.047865459	0.738396624	-2.54845	4	35	active	0.988292639	True
Capra_hircus	NC_030824.1.tRNA6311-AspGTC	NC_030824.1	20323912	20323984	-	13	-26.4	66.5	1.455138889	8	0.038860104	0.681818182	-4.6889	4	35	active	0.988989434	True
Capra_hircus	NC_030824.1.tRNA6312-AlaTGC	NC_030824.1	20320576	20320648	-	13	-26.5	79.7	1.2635	12	0.015544041	0.404063727	-2.96335	4	35	active	0.701314928	True
Capra_hircus	NC_030824.1.tRNA6391-PheGAA	NC_030824.1	19601559	19601632	-	12	-9.5	61.6	0.011027397	351	0.009055627	0.19640853	-0.2793	0	0	inactive	-0.910397036	True
Capra_hircus	NC_030824.1.tRNA6669-TrpCCA	NC_030824.1	16893227	16893300	-	40	-12.3	54.7	0.1	83	0.005174644	0.112830432	0.12005	0	58	inactive	-0.89831869	True
Capra_hircus	NC_030824.1.tRNA6724-TrpCCA	NC_030824.1	15890310	15890383	-	40	-26.3	57.9	-0.006575758	119	0.005174644	0.286885246	0.2105	0	45	inactive	-0.911088096	True
Capra_hircus	NC_030824.1.tRNA7062-GlyCCC	NC_030824.1	10585297	10585370	-	37	-23.9	59.3	0.07069863	102	0.006468305	0.097615395	0.1416	0	16	inactive	-0.936796835	True
Capra_hircus	NC_030824.1.tRNA7211-GlyCCC	NC_030824.1	8706807	8706880	-	37	-22	63.6	0.073082192	160	0.007761966	0.201612903	0.09015	0	19	inactive	-0.946440311	True
Capra_hircus	NC_030824.1.tRNA96-GlyCCC	NC_030824.1	2044648	2044720	+	37	-19.4	61.2	0.096569444	78	0.015544041	0.364583333	0.00575	0	15	inactive	-0.861715846	True
Capra_hircus	NC_030825.1.tRNA105-GlyGCC	NC_030825.1	2674435	2674506	+	11	-26.4	81	0.804690141	12	0.044098573	0.49122807	-0.703	2	28	active	0.972235866	True
Capra_hircus	NC_030825.1.tRNA1170-AlaAGC	NC_030825.1	24928580	24928653	+	12	-26.2	55.2	0.112726027	8	0.016817594	0.217824247	-0.3927	0	8	inactive	-0.806751715	True
Capra_hircus	NC_030825.1.tRNA1202-PheGAA	NC_030825.1	25241297	25241370	+	12	-17.9	69.1	-0.532575342	319	0.009055627	0.127830533	0.0413	0	29	inactive	-0.929030582	True
Capra_hircus	NC_030825.1.tRNA121-GlyGCC	NC_030825.1	3065660	3065731	+	11	-26.4	81	0.931577465	17	0.057068742	0.746606335	-5.28235	0	72	active	0.987195789	True
Capra_hircus	NC_030825.1.tRNA1262-LeuCAG	NC_030825.1	26665146	26665229	+	6	-32.8	77.3	1.058036145	10	0.043422733	0.652376514	-2.4049	1	26	active	0.986067594	True
Capra_hircus	NC_030825.1.tRNA1336-GlyCCC	NC_030825.1	27606831	27606904	+	37	-20	64.3	-0.020863014	150	0.010349288	0.100922722	-0.1927	0	65	inactive	-0.943654058	True
Capra_hircus	NC_030825.1.tRNA1490-GlyCCC	NC_030825.1	30670130	30670203	+	37	-21.4	69	0.068712329	57	0.007761966	0.207900208	0.0389	0	5	inactive	-0.944194386	True
Capra_hircus	NC_030825.1.tRNA1768-SerAGA	NC_030825.1	36651744	36651826	+	6	-19.7	61.4	0.0545	67	0.008951407	0	-0.42065	0	127	inactive	-0.878679493	True
Capra_hircus	NC_030825.1.tRNA2058-GlyCCC	NC_030825.1	43721957	43722030	+	37	-25.5	67.4	-0.037493151	231	0.005174644	0.167250717	-0.7106	0	1	inactive	-0.955498037	True
Capra_hircus	NC_030825.1.tRNA2123-ThrAGT	NC_030825.1	44659039	44659113	+	5	-27.3	82.6	1.500148649	21	0.062015504	0.793938844	-1.56175	0	39	active	0.98284302	True
Capra_hircus	NC_030825.1.tRNA2412-GluTTC	NC_030825.1	48305704	48305776	+	38	-18.6	55.9	-0.0165	35	0	0	-1.28085	0	30	inactive	-0.941340389	True
Capra_hircus	NC_030825.1.tRNA2706-TrpCCA	NC_030825.1	51969483	51969556	+	40	-19.9	55.8	0.049561644	351	0.009055627	0.107099143	-0.1087	0	33	inactive	-0.942712958	True
Capra_hircus	NC_030825.1.tRNA2910-GlyCCC	NC_030825.1	54081992	54082065	+	37	-22.7	59	-0.209013699	351	0.016817594	0.223499361	0.0386	0	99	inactive	-0.876613872	True
Capra_hircus	NC_030825.1.tRNA3067-GluTTC	NC_030825.1	55880279	55880352	+	38	-17.4	61.6	0.006287671	351	0.032341527	0.561797753	-0.26635	0	51	inactive	-0.582330023	True
Capra_hircus	NC_030825.1.tRNA3936-ValCAC	NC_030825.1	62421919	62421992	-	15	-12.6	54.7	-0.021575342	61	0.012936611	0.442701746	0.02005	0	52	inactive	-0.772812839	True
Capra_hircus	NC_030825.1.tRNA4359-iMetCAT	NC_030825.1	55692991	55693063	-	11	-23.7	56.8	0.099777778	9	0.029792746	0.480769231	0.1005	0	44	active	0.767402668	True
Capra_hircus	NC_030825.1.tRNA4384-GluTTC	NC_030825.1	55396387	55396459	-	38	-21.3	62.3	0.016666667	351	0.042746114	0.522700119	-0.2751	0	48	active	0.53263389	True
Capra_hircus	NC_030825.1.tRNA4434-AlaAGC	NC_030825.1	54762918	54762990	-	12	-27.5	83	0.122097222	8	0.007772021	0.070578746	-0.60145	0	36	inactive	-0.67163159	True
Capra_hircus	NC_030825.1.tRNA4491-SeCTCA	NC_030825.1	54137018	54137105	-	5	-37.1	146.9	1.365724138	12	0.029224905	0.729166667	-4.85665	0	66	active	0.98022434	True
Capra_hircus	NC_030825.1.tRNA4853-IleTAT	NC_030825.1	49984167	49984260	-	2	-30.9	73.8	1.379905405	1	0.047919294	0.697463768	0.08745	0	120	active	0.921658186	True
Capra_hircus	NC_030825.1.tRNA5096-ThrTGT	NC_030825.1	47230784	47230857	-	9	-21.8	68.3	0.013739726	122	0	0	-0.3205	0	106	inactive	-0.90987618	True
Capra_hircus	NC_030825.1.tRNA5134-ValCAC	NC_030825.1	46842026	46842098	-	15	-21.9	51.4	0.094722222	100	0.023316062	0.271618625	0.0115	0	57	inactive	-0.621868248	True
Capra_hircus	NC_030825.1.tRNA5437-MetCAT	NC_030825.1	40843508	40843581	-	11	-24	81.2	0.620369863	5	0.069857697	0.95	-1.6226	0	22	active	0.984176675	True
Capra_hircus	NC_030825.1.tRNA6146-LeuCAG	NC_030825.1	26665433	26665516	-	6	-32.8	77.3	1.371722892	10	0.058748404	0.994932641	-4.7487	1	25	active	0.986335582	True
Capra_hircus	NC_030825.1.tRNA7294-GlyGCC	NC_030825.1	2667407	2667478	-	11	-26.4	81	1.250098592	7	0.019455253	0.134680135	-0.8522	2	20	active	0.617113507	True
Capra_hircus	NC_030825.1.tRNA7295-GlyGCC	NC_030825.1	2666749	2666820	-	11	-26.4	81	1.26015493	115	0.025940337	0.114329268	-0.00245	2	20	active	0.574338862	True
Capra_hircus	NC_030825.1.tRNA846-GlyTCC	NC_030825.1	18819177	18819250	+	20	-21.9	60.5	0.02960274	351	0.018111255	0.444983819	-0.25785	0	22	inactive	-0.571409569	True
Capra_hircus	NC_030826.1.tRNA1035-GlyTCC	NC_030826.1	20038339	20038412	+	20	-19.3	66.2	0.033479452	94	0.003880983	0.104493208	-0.06035	0	92	inactive	-0.907015887	True
Capra_hircus	NC_030826.1.tRNA1044-ValCAC	NC_030826.1	20251149	20251222	+	15	-13.2	63.9	0.120287671	97	0.010349288	0.254065041	-0.2932	0	57	inactive	-0.854982572	True
Capra_hircus	NC_030826.1.tRNA1196-GluTTC	NC_030826.1	22376364	22376437	+	38	-20.4	72.1	0.011849315	351	0.01164295	0.092592593	-0.04815	0	62	inactive	-0.930982393	True
Capra_hircus	NC_030826.1.tRNA1485-SerTGA	NC_030826.1	26184531	26184604	+	1	-22.2	63.2	0.005835616	136	0.009055627	0.231061231	-0.2796	0	95	inactive	-0.91472275	True
Capra_hircus	NC_030826.1.tRNA1565-LysTTT	NC_030826.1	27497555	27497628	+	21	-27.5	87.8	1.556369863	5	0.04915912	0.902061856	-5.2651	4	100	active	0.988693519	True
Capra_hircus	NC_030826.1.tRNA1566-GlnCTG	NC_030826.1	27498209	27498281	+	14	-24.7	71.5	1.303722222	5	0.022020725	0.691699605	-4.8621	4	101	active	0.978709923	True
Capra_hircus	NC_030826.1.tRNA1567-ArgTCT	NC_030826.1	27499287	27499374	+	12	-25.6	70.8	1.453260274	1	0.050825921	0.751922207	-0.3946	4	104	active	0.960003939	True
Capra_hircus	NC_030826.1.tRNA1568-GlyGCC	NC_030826.1	27504044	27504115	+	11	-26.4	81	0.929605634	5	0.057068742	0.530176194	-3.61215	6	109	active	0.988131548	True
Capra_hircus	NC_030826.1.tRNA1569-TrpCCA	NC_030826.1	27565683	27565755	+	40	-25.1	73.3	1.470569444	8	0.082901554	0.642201835	-1.9668	3	112	active	0.952531823	True
Capra_hircus	NC_030826.1.tRNA1570-SerGCT	NC_030826.1	27566193	27566275	+	9	-30.7	88.4	1.514621951	27	0.072890026	0.912441568	-4.107	3	113	active	0.988299085	True
Capra_hircus	NC_030826.1.tRNA1571-ThrAGT	NC_030826.1	27566495	27566569	+	5	-27.3	82.6	0.629121622	16	0.050387597	0.874125874	-4.3333	3	114	active	0.98692705	True
Capra_hircus	NC_030826.1.tRNA1572-IleAAT	NC_030826.1	27566958	27567032	+	5	-25.5	81.2	1.543986486	14	0.0374677	0.840724316	-5.7774	3	116	active	0.987862783	True
Capra_hircus	NC_030826.1.tRNA1574-GlyTCC	NC_030826.1	27582911	27582983	+	20	-25.1	73.8	1.067013889	6	0.041450777	0.900735294	-3.0644	6	108	active	0.988426166	True
Capra_hircus	NC_030826.1.tRNA1875-ArgCCG	NC_030826.1	31687275	31687348	+	2	-20.3	64.9	-0.060465753	221	0.009055627	0	-0.3261	0	0	inactive	-0.890789162	True
Capra_hircus	NC_030826.1.tRNA1959-TrpCCA	NC_030826.1	32791623	32791695	+	40	-25.1	75.1	0.3535	10	0.045336788	0.73792958	-0.8389	0	27	active	0.906301337	True
Capra_hircus	NC_030826.1.tRNA216-ThrTGT	NC_030826.1	7671253	7671327	+	9	-19.9	62.9	-0.003851351	6	0.006459948	0.280448718	-0.06055	0	11	inactive	-0.845684779	True
Capra_hircus	NC_030826.1.tRNA2204-ThrAGT	NC_030826.1	38440223	38440297	+	5	-24.9	68	0	22	0.015503876	0	0.09045	0	59	inactive	-0.861960381	True
Capra_hircus	NC_030826.1.tRNA2238-CysGCA	NC_030826.1	39104740	39104812	+	38	-26.1	81.9	1.287430556	7	0.012953368	0.322209436	-3.5665	2	40	inactive	-0.596928047	True
Capra_hircus	NC_030826.1.tRNA2914-ArgCCG	NC_030826.1	48544517	48544590	+	2	-29	64.9	1.583452055	12	0.056921087	0.939754992	0.2325	0	37	active	0.917123036	True
Capra_hircus	NC_030826.1.tRNA2978-GlnTTG	NC_030826.1	49658669	49658741	+	5	-22.7	70.8	-0.138638889	1	0.011658031	0.166191833	-0.6807	0	56	inactive	-0.824172428	True
Capra_hircus	NC_030826.1.tRNA3352-ArgTCG	NC_030826.1	55626209	55626282	+	4	-25.9	66.4	-0.02769863	6	0.099611902	0.954861111	-1.7656	3	73	active	0.894848344	True
Capra_hircus	NC_030826.1.tRNA3353-ArgCCT	NC_030826.1	55626604	55626677	+	19	-32.1	71.1	0.764931507	34	0.086675291	1.129032258	-3.10915	3	73	active	0.977617478	True
Capra_hircus	NC_030826.1.tRNA370-ArgCCT	NC_030826.1	10808918	10808991	+	19	-18.8	64.2	0.033835616	54	0.010349288	0.230718523	0.0207	0	51	inactive	-0.925396201	True
Capra_hircus	NC_030826.1.tRNA4207-ArgCCT	NC_030826.1	55627106	55627179	-	19	-32.1	72.3	1.219753425	7	0.064683053	0.815090824	-3.2819	3	73	active	0.987522896	True
Capra_hircus	NC_030826.1.tRNA4208-ArgCCT	NC_030826.1	55625669	55625742	-	19	-30.2	67.5	0.985410959	61	0.071151358	1.100221893	-0.3903	3	73	active	0.906653666	True
Capra_hircus	NC_030826.1.tRNA4253-AlaAGC	NC_030826.1	55074464	55074536	-	12	-27.5	83	-0.149847222	8	0.012953368	0.079690346	-1.0183	0	106	inactive	-0.656815457	True
Capra_hircus	NC_030826.1.tRNA4630-SerAGA	NC_030826.1	48775029	48775111	-	6	-32.8	90.3	0.122231707	346	0.024296675	0.205882353	-0.4141	0	24	active	0.531027566	True
Capra_hircus	NC_030826.1.tRNA5095-GluTTC	NC_030826.1	42505203	42505276	-	38	-21.1	60.5	0.099054795	248	0.009055627	0.124466572	-0.4591	0	100	inactive	-0.924016934	True
Capra_hircus	NC_030826.1.tRNA5120-SerGCT	NC_030826.1	42215675	42215757	-	9	-21.9	70.6	-0.21145122	351	0.019181586	0.122720898	-0.5305	0	57	inactive	-0.742596246	True
Capra_hircus	NC_030826.1.tRNA5297-CysGCA	NC_030826.1	39306737	39306809	-	38	-26.1	81.9	1.489597222	15	0.029792746	0.16218721	-4.2709	1	68	active	0.719110234	True
Capra_hircus	NC_030826.1.tRNA5298-CysGCA	NC_030826.1	39305985	39306057	-	38	-26.1	81.9	1.497180556	8	0.028497409	0.595238095	-2.3022	1	66	active	0.94196764	True
Capra_hircus	NC_030826.1.tRNA5315-CysGCA	NC_030826.1	39106499	39106571	-	38	-23.9	81.8	1.476791667	6	0.047927461	0.866709733	-1.85235	2	40	active	0.970876885	True
Capra_hircus	NC_030826.1.tRNA5316-CysGCA	NC_030826.1	39101783	39101855	-	38	-26.1	77.3	0.873444444	11	0.012953368	0.287686997	-1.4535	2	40	inactive	-0.82036082	True
Capra_hircus	NC_030826.1.tRNA5320-CysGCA	NC_030826.1	39086033	39086105	-	38	-23.9	77.1	0.922888889	13	0.009067358	0.113969391	-3.21735	0	42	inactive	-0.851933948	True
Capra_hircus	NC_030826.1.tRNA5325-AsnGTT	NC_030826.1	39000838	39000912	-	22	-26.4	80.9	1.534297297	5	0.047803618	0.780901383	-2.01375	0	69	active	0.986706737	True
Capra_hircus	NC_030826.1.tRNA5418-GlnTTG	NC_030826.1	37018773	37018845	-	5	-27.1	72.6	1.578944444	9	0.073834197	0.730961438	0.09845	0	26	active	0.970457413	True
Capra_hircus	NC_030826.1.tRNA5546-TrpCCA	NC_030826.1	33694385	33694457	-	40	-25.1	75.1	1.171444444	7	0.082901554	1.034686638	-2.365	0	47	active	0.93427513	True
Capra_hircus	NC_030826.1.tRNA5709-CysACA	NC_030826.1	31401423	31401496	-	2	-15.5	66.8	-0.593	285	0.014230272	0.261662679	-0.54135	0	1	inactive	-0.840199246	True
Capra_hircus	NC_030826.1.tRNA5984-IleAAT	NC_030826.1	27588619	27588693	-	5	-25.5	81.2	1.208648649	10	0.047803618	0.46113307	-4.35805	6	109	active	0.985025876	True
Capra_hircus	NC_030826.1.tRNA5985-SerAGA	NC_030826.1	27588033	27588115	-	6	-32.8	89.6	1.32152439	6	0.046035806	0.694961529	-5.12805	6	109	active	0.987623752	True
Capra_hircus	NC_030826.1.tRNA5986-ThrAGT	NC_030826.1	27587675	27587749	-	5	-27.3	82.6	1.273162162	22	0.042635659	0.775316456	-3.45475	6	109	active	0.985058663	True
Capra_hircus	NC_030826.1.tRNA5987-ProCGG	NC_030826.1	27584192	27584264	-	2	-29.5	70.2	1.358361111	10	0.063471503	0.826596421	-3.0662	6	108	active	0.932711413	True
Capra_hircus	NC_030826.1.tRNA5988-AspGTC	NC_030826.1	27583381	27583453	-	13	-26.4	66.5	1.353555556	14	0.033678756	0.46741453	-4.94115	6	108	active	0.988759297	True
Capra_hircus	NC_030826.1.tRNA5989-TrpCCA	NC_030826.1	27582227	27582299	-	40	-24.5	73.4	1.032208333	8	0.049222798	1.156642432	-4.00095	6	108	active	0.922889927	True
Capra_hircus	NC_030826.1.tRNA5993-ThrAGT	NC_030826.1	27513174	27513248	-	5	-27.3	80.1	1.228810811	147	0.033591731	0.415348101	-4.29695	2	101	active	0.909482072	True
Capra_hircus	NC_030826.1.tRNA5994-SerCGA	NC_030826.1	27512674	27512756	-	2	-34	95.1	1.474743902	7	0.040920716	0.728407908	-0.89635	2	103	active	0.940028149	True
Capra_hircus	NC_030826.1.tRNA5995-LeuTAG	NC_030826.1	27498705	27498787	-	3	-33.3	75.2	1.528341463	8	0.034526854	0.520123839	-2.8515	4	101	active	0.953952587	True
Capra_hircus	NC_030826.1.tRNA6210-LysCTT	NC_030826.1	24441108	24441181	-	14	-21.8	78	?	351	0.020698577	0.156739812	?	0	72	inactive	-0.585494646	True
Capra_hircus	NC_030826.1.tRNA6673-ThrCGT	NC_030826.1	18141217	18141289	-	1	-27.3	78.3	1.180416667	77	0.116580311	0.87024087	0.558	0	17	active	0.856352592	True
Capra_hircus	NC_030826.1.tRNA6765-UndetNNN	NC_030826.1	17126703	17126776	-	4	-18.9	56.9	0.02269863	34	0.012936611	0.293476438	-0.2313	0	15	inactive	-0.859199041	True
Capra_hircus	NC_030826.1.tRNA6793-LysTTT	NC_030826.1	16735523	16735595	-	21	-19.7	66.3	0.006430556	351	0.016839378	0.372340426	-0.0106	0	1	inactive	-0.820622171	True
Capra_hircus	NC_030826.1.tRNA7118-TrpCCA	NC_030826.1	12029311	12029384	-	40	-28.9	52.3	0.018657534	270	0.014230272	0.307692308	-0.06265	0	10	inactive	-0.780190736	True
Capra_hircus	NC_030826.1.tRNA7220-GluTTC	NC_030826.1	10469987	10470059	-	38	-20.1	53.7	0.051555556	144	0.006476684	0.234375	0.1096	0	44	inactive	-0.942120286	True
Capra_hircus	NC_030826.1.tRNA870-ArgTCT	NC_030826.1	17677819	17677892	+	12	-22	52.7	-0.40669863	351	0.019404916	0.381818182	-0.0484	0	51	inactive	-0.811668075	True
Capra_hircus	NC_030827.1.tRNA1193-AlaGGC	NC_030827.1	24720539	24720611	+	1	-28.5	78.5	-0.012430556	8	0.007772021	0.177454791	-0.13915	0	2	inactive	-0.734700855	True
Capra_hircus	NC_030827.1.tRNA1580-TyrGTA	NC_030827.1	32991803	32991892	+	16	-30	70.5	0.091	6	0.00887199	0.111607143	-0.2145	0	1	inactive	-0.744627991	True
Capra_hircus	NC_030827.1.tRNA2385-PheGAA	NC_030827.1	48630233	48630306	+	12	-19.4	71	-0.043589041	219	0.005174644	0	-0.1482	0	0	inactive	-0.924859043	True
Capra_hircus	NC_030827.1.tRNA3610-SerGGA	NC_030827.1	71360990	71361062	-	27	-20	65.8	?	167	0.018134715	0.527585167	0.23125	0	45	active	0.601633594	True
Capra_hircus	NC_030827.1.tRNA4562-SerGCT	NC_030827.1	55249675	55249760	-	9	-17.5	62.5	-0.098129412	121	0.01656051	0.27124774	-0.1203	0	0	inactive	-0.867527987	True
Capra_hircus	NC_030827.1.tRNA6813-ArgTCG	NC_030827.1	7501522	7501595	-	4	-23.7	64.9	0.203808219	6	0.015523933	0.193991797	-0.76705	0	0	inactive	-0.825647966	True
Capra_hircus	NC_030828.1.tRNA1023-LysCTT	NC_030828.1	20459592	20459665	+	14	-18.9	58.1	0.069315068	64	0.005174644	0.108024691	-0.0002	0	51	inactive	-0.916871709	True
Capra_hircus	NC_030828.1.tRNA1624-SerGCT	NC_030828.1	28349913	28349986	+	9	-15.3	60.3	0.006082192	351	0.007761966	0.210843373	-0.0974	0	21	inactive	-0.923209785	True
Capra_hircus	NC_030828.1.tRNA2342-TyrGTA	NC_030828.1	44402214	44402304	+	16	-27.1	75.4	0.122068493	12	0.058227848	0.904003444	0.04255	1	28	active	0.934317488	True
Capra_hircus	NC_030828.1.tRNA2343-TyrGTA	NC_030828.1	44408348	44408438	+	16	-27.1	75.4	0.122068493	12	0.067088608	0.653271849	0.04255	1	28	active	0.934644051	True
Capra_hircus	NC_030828.1.tRNA3319-SerGGA	NC_030828.1	62639823	62639895	+	27	-19.5	64.6	0	175	0.005181347	0.067724458	-0.2972	0	0	inactive	-0.922618555	True
Capra_hircus	NC_030828.1.tRNA3482-AlaAGC	NC_030828.1	66183585	66183657	+	12	-21.1	51.2	-0.222569444	151	0.016839378	0.248101266	-0.07515	0	97	inactive	-0.855849665	True
Capra_hircus	NC_030828.1.tRNA3490-IleAAT	NC_030828.1	66369713	66369787	+	5	-25.5	81.2	0.951959459	11	0.068475452	0.821133634	-3.47855	0	43	active	0.984735804	True
Capra_hircus	NC_030828.1.tRNA3527-GluTTC	NC_030828.1	67151832	67151905	+	38	-21.6	62.3	-0.06930137	351	0.012936611	0.074690568	-0.20605	0	29	inactive	-0.962450014	True
Capra_hircus	NC_030828.1.tRNA3600-TrpCCA	NC_030828.1	68532561	68532633	+	40	-25.2	50.4	0.068208333	57	0.019430052	0.380986938	-0.2934	0	51	inactive	-0.72932225	True
Capra_hircus	NC_030828.1.tRNA4119-AspGTC	NC_030828.1	59135031	59135153	-	13	-39.9	64.6	0.100369863	81	0.00729927	0.188713156	-0.0718	0	3	inactive	-0.763127024	True
Capra_hircus	NC_030828.1.tRNA42-PheGAA	NC_030828.1	1910807	1910880	+	12	-12.2	54.9	0	126	0.007761966	0.088922764	-0.74975	0	17	inactive	-0.933494212	True
Capra_hircus	NC_030828.1.tRNA4866-TyrGTA	NC_030828.1	44389252	44389342	-	16	-27.1	75.4	0.122205479	12	0.092405063	0.942527107	0.0426	0	27	active	0.936350796	True
Capra_hircus	NC_030828.1.tRNA5006-TrpCCA	NC_030828.1	40588432	40588504	-	40	-21.1	60.1	?	351	0.022020725	0.377155172	?	0	2	inactive	-0.537246324	True
Capra_hircus	NC_030828.1.tRNA5489-LysCTT	NC_030828.1	29878253	29878326	-	14	-30.1	88	0.307109589	79	0.029754204	0.849661869	-2.51945	0	14	active	0.966487015	True
Capra_hircus	NC_030828.1.tRNA6121-GlyCCC	NC_030828.1	20974302	20974375	-	37	-20.6	70.5	0.055917808	351	0.005174644	0.061188811	-0.2916	0	122	inactive	-0.936986666	True
Capra_hircus	NC_030828.1.tRNA6541-SerGCT	NC_030828.1	15051833	15051915	-	9	-20.6	61.9	?	31	0.015345269	0.222137598	-0.695142857	0	1	inactive	-0.835374859	True
Capra_hircus	NC_030828.1.tRNA6587-LysCTT	NC_030828.1	14127036	14127110	-	14	-24.4	77	-0.653	351	0.019379845	0.225442834	-0.40065	0	7	inactive	-0.748197491	True
Capra_hircus	NC_030828.1.tRNA7073-GluTTC	NC_030828.1	2440609	2440681	-	38	-26.7	71.2	1.308	10	0.066062176	1.000680735	-3.9494	0	0	active	0.893420475	True
Capra_hircus	NC_030828.1.tRNA711-GluTTC	NC_030828.1	15480440	15480512	+	38	-24.4	58.6	-0.109319444	70	0.011658031	0.135396518	-0.16765	0	1	inactive	-0.936790183	True
Capra_hircus	NC_030828.1.tRNA991-ArgTCG	NC_030828.1	20101427	20101500	+	4	-29.2	74.8	1.501383562	16	0.059508409	0.747520976	-3.32795	0	63	active	0.981696285	True
Capra_hircus	NC_030829.1.tRNA2325-ArgACG	NC_030829.1	53632920	53632993	+	2	-23.1	64.2	1.438260274	8	0.076326003	1.045444847	-3.4256	0	32	active	0.909832035	True
Capra_hircus	NC_030829.1.tRNA255-LysCTT	NC_030829.1	6366903	6366976	+	14	-15.3	56	0.033424658	78	0.007761966	0.317028986	0.04165	0	4	inactive	-0.877021557	True
Capra_hircus	NC_030829.1.tRNA283-AspGTC	NC_030829.1	6633028	6633100	+	13	-26.2	59.4	0	147	0.015544041	0.062012757	0.0725	0	3	inactive	-0.916954162	True
Capra_hircus	NC_030829.1.tRNA342-TrpCCA	NC_030829.1	7216608	7216680	+	40	-21.5	65.3	0	217	0.009067358	0.093333333	-0.07705	0	18	inactive	-0.946524731	True
Capra_hircus	NC_030829.1.tRNA3420-LysTTT	NC_030829.1	43051340	43051412	-	21	-22.3	56.5	-0.123305556	104	0.010362694	0.325581395	-0.3041	0	49	inactive	-0.884759835	True
Capra_hircus	NC_030829.1.tRNA4461-AlaCGC	NC_030829.1	17928822	17928895	-	3	-24.1	50.9	0.00669863	76	0.006468305	0	-0.2212	0	0	inactive	-0.865372264	True
Capra_hircus	NC_030829.1.tRNA5004-GluCTC	NC_030829.1	8161293	8161366	-	11	-17.4	66.6	0.078	110	0.007761966	0.109392093	-0.018	0	0	inactive	-0.860322475	True
Cavia_porcellus	tRNA-Ala-AGC-1-1	scaffold_108	1183453	1183525	+	19	-30.4	85.3	0.271611111	58	0.027202073	0.692541857	-0.6323	4	16	active	0.888787443	True
Cavia_porcellus	tRNA-Ala-AGC-1-2	scaffold_108	1190504	1190576	+	19	-30.4	85.3	0.281763889	50	0.088082902	0.808500809	-0.453	5	17	active	0.92259721	True
Cavia_porcellus	tRNA-Ala-AGC-10-1	scaffold_65	1710641	1710714	+	19	-22.9	66.1	0	69	0.01164295	0.165719697	0	0	41	inactive	-0.932727315	True
Cavia_porcellus	tRNA-Ala-AGC-11-1	scaffold_20	9293072	9293144	-	19	-26.2	66	-0.186638889	242	0.012953368	0.240549828	-0.12385	0	14	inactive	-0.875823103	True
Cavia_porcellus	tRNA-Ala-AGC-12-1	scaffold_101	2628204	2628276	+	19	-18.6	52.9	-0.070597222	351	0.00388601	0.102941176	-0.15935	0	7	inactive	-0.948867247	True
Cavia_porcellus	tRNA-Ala-AGC-13-1	scaffold_4	4510756	4510830	-	19	-8.5	65.6	?	69	0.003875969	0	?	0	0	inactive	-0.794745228	True
Cavia_porcellus	tRNA-Ala-AGC-14-1	scaffold_108	1240839	1240911	-	19	-20	56.6	0.000125	122	0.031088083	0.720164609	-0.66155	3	20	active	0.546638338	True
Cavia_porcellus	tRNA-Ala-AGC-15-1	scaffold_184	401746	401818	-	19	-12.5	61.4	-0.148013889	351	0.007772021	0.265151515	-0.4595	0	102	inactive	-0.899559174	True
Cavia_porcellus	tRNA-Ala-AGC-2-1	scaffold_108	1201354	1201426	-	19	-31.9	85.8	-0.029569444	68	0.064766839	0.823729914	-0.1323	5	21	active	0.76570232	True
Cavia_porcellus	tRNA-Ala-AGC-2-2	scaffold_108	1241049	1241121	-	19	-31.9	85.8	0.194944444	65	0.055699482	0.834615385	-0.595	3	20	active	0.914158864	True
Cavia_porcellus	tRNA-Ala-AGC-3-1	scaffold_22	2968397	2968469	+	19	-31.9	84.7	0.281847222	178	0.023316062	0.438282648	-0.7096	1	71	active	0.750769395	True
Cavia_porcellus	tRNA-Ala-AGC-3-2	scaffold_108	1181506	1181578	+	19	-31.9	84.7	0.246611111	1	0.110103627	0.825350037	-0.3382	3	15	active	0.920915228	True
Cavia_porcellus	tRNA-Ala-AGC-4-1	scaffold_108	1205721	1205793	+	19	-30.4	80.8	-0.20425	17	0.055699482	0.840573568	0	3	21	active	0.798442739	True
Cavia_porcellus	tRNA-Ala-AGC-5-1	scaffold_108	1200858	1200930	-	19	-21.8	70.4	-0.060958333	68	0.033678756	0.697865353	0	5	21	active	0.676479172	True
Cavia_porcellus	tRNA-Ala-AGC-6-1	scaffold_42	8540810	8540883	-	19	-27.7	55.7	0.765890411	8	0.037516171	0.738742964	-2.1615	0	26	active	0.810414767	True
Cavia_porcellus	tRNA-Ala-AGC-7-1	scaffold_0	46309309	46309382	-	19	-32	59.7	1.611013699	1	0.055627426	1.098837209	-1.1827	2	19	active	0.973901034	True
Cavia_porcellus	tRNA-Ala-AGC-7-2	scaffold_18	8902297	8902370	+	19	-32	59.7	1.565890411	6	0.089262613	0.962199313	-2.51595	1	87	active	0.979002098	True
Cavia_porcellus	tRNA-Ala-AGC-8-1	scaffold_38	21206825	21206898	-	19	-29.6	58.9	1.066410959	1	0.037516171	0.527047376	-2.78445	7	23	active	0.960409589	True
Cavia_porcellus	tRNA-Ala-AGC-9-1	scaffold_38	21338831	21338904	-	19	-28.6	54.4	0.171835616	4	0.03622251	0.776053215	-0.80915	3	13	active	0.751129051	True
Cavia_porcellus	tRNA-Ala-CGC-1-1	scaffold_27	27055708	27055780	+	5	-30.4	84.2	0.199944444	16	0.007772021	0.04877369	-0.308	0	0	inactive	-0.604537778	True
Cavia_porcellus	tRNA-Ala-CGC-2-1	scaffold_38	21198493	21198565	+	5	-26.5	79.7	1.404805556	8	0.024611399	0.576131687	-3.8769	5	22	active	0.98158224	True
Cavia_porcellus	tRNA-Ala-CGC-3-1	scaffold_3	31957609	31957681	-	5	-27.6	74.4	1.601791667	18	0.044041451	0.725428166	-2.3779	1	11	active	0.98225466	True
[truncated: 9,491 more rows]
