# Supplementary material for: Predicting transfer RNA gene activity from sequence and genome context
Source: HighWire-hosted journal article supplement (doi:10.1101/gr.256164.119), 2019-12-19
Supplement: Supplemental_Table_S9.xlsx [file Supplemental_Table_S9.xlsx]

## Sheet: S9
Supplemental Table S9: For all species included in this study, tRNA gene names, genomic locations, feature data, predictions and prediction probabilities are shown. This includes tRNA genes in segmental duplications for all species, as well as human and mouse tRNA genes for which epigenomic data was not available.
species	tRNA	chr	start	end	strand	Total Number of tRNA Genes With Identical Anticodon	Minimum Free Energy of Canonical tRNA Secondary Structure	tRNAscan-SE General Bit Score	Average PhyloP Score in tRNA Gene Sequence	Distance To Nearest TTTT Transcription Termination Sequence	CpG Density Across tRNA Locus	Observed/Expected CpG Islands Score Upstream of tRNA Gene	Average PhyloP Score in 5' Flanking Region	tRNA Genes Within 10 Kilobases	Exons Within 75 Kilobases	prediction	probability	inTestSet
Aotus_nancymaae	JYKP02026507.1.tRNA1-ArgCCT	JYKP02026507.1	1078	1151	+	4	-30.6	71.7	0.930958904	12	0.033635188	0.665266106	-2.73775	0	0	active	0.960701257	True
Aotus_nancymaae	JYKP02111668.1.tRNA1-GluCTC	JYKP02111668.1	1149	1221	-	6	-26.4	73.2	1.167819444	6	0.020501139	0	-3.908777778	0	0	active	0.835960404	True
Aotus_nancymaae	KZ195588.1.tRNA2-TyrGTA	KZ195588.1	5722236	5722329	-	11	-28.4	75.3	0.870068493	12	0.070617907	0.809968847	-2.9503	2	19	active	0.987281301	True
Aotus_nancymaae	KZ195588.1.tRNA3-TyrGTA	KZ195588.1	5721624	5721713	-	11	-29.7	75.5	1.213931507	12	0.062103929	0.82173913	-3.3706	2	19	active	0.98829656	True
Aotus_nancymaae	KZ195588.1.tRNA4-AlaAGC	KZ195588.1	5721448	5721521	-	14	-32	59.7	1.63660274	1	0.045278137	0.804597701	-1.1141	2	19	active	0.982616022	True
Aotus_nancymaae	KZ195642.1.tRNA1-AsnGTT	KZ195642.1	4198925	4198999	+	17	-26.4	80.9	1.425891892	8	0.067183463	0.358974359	-3.31425	0	4	active	0.893703898	True
Aotus_nancymaae	KZ195677.1.tRNA1-LysCTT	KZ195677.1	536	609	+	12	-28	87.8	-0.033945205	9	0.010349288	0.044546264	-0.5598	0	0	inactive	-0.70081301	True
Aotus_nancymaae	KZ195705.1.tRNA1-IleAAT	KZ195705.1	1015	1089	+	9	-23.6	78.8	0.342821918	45	0.032299742	0.693265422	-2.98315	0	0	active	0.94921888	True
Aotus_nancymaae	KZ196050.1.tRNA2-LysCTT	KZ196050.1	7279629	7279702	-	12	-30.1	88	1.297643836	11	0.028460543	0.990566038	-3.30045	0	33	active	0.986800533	True
Aotus_nancymaae	KZ196119.1.tRNA1-LysCTT	KZ196119.1	1781	1854	-	12	-30.1	88	0.444164384	7	0.051746442	0.981216709	-2.45295	0	0	active	0.954992804	True
Aotus_nancymaae	KZ196472.1.tRNA1-ProAGG	KZ196472.1	9610345	9610417	+	12	-29.5	70.2	1.406805556	3	0.014248705	0.107131925	-1.41495	0	81	inactive	-0.589661811	True
Aotus_nancymaae	KZ196704.1.tRNA1-GlyCCC	KZ196704.1	732918	732989	+	3	-31.4	75.1	1.430070423	6	0.089494163	0.953405018	-4.4368	0	146	active	0.943012146	True
Aotus_nancymaae	KZ196745.1.tRNA1-AsnGTT	KZ196745.1	1215240	1215314	+	17	-17.2	66.5	0.003486486	12	0.00129199	0	-0.3088	0	1	inactive	-0.915699492	True
Aotus_nancymaae	KZ196935.1.tRNA1-ArgTCT	KZ196935.1	82259	82345	+	5	-29.9	70.3	1.190356164	1	0.043256997	1.017864562	-2.56175	4	20	active	0.987657196	True
Aotus_nancymaae	KZ196935.1.tRNA3-LysTTT	KZ196935.1	90578	90651	+	11	-26.7	85.3	0.952260274	7	0.034928849	0.809435708	-3.8172	6	21	active	0.986876091	True
Aotus_nancymaae	KZ196935.1.tRNA4-PheGAA	KZ196935.1	99496	99569	-	10	-21.9	78.6	0.306191781	9	0.031047865	0.625	-3.0302	3	25	active	0.984205823	True
Aotus_nancymaae	KZ196935.1.tRNA5-LysTTT	KZ196935.1	94912	94985	-	11	-27.5	87.8	1.247054795	10	0.03622251	0.719741481	-3.797	3	23	active	0.988165998	True
Aotus_nancymaae	KZ196935.1.tRNA6-PheGAA	KZ196935.1	91616	91689	-	10	-19.1	85.6	1.217657534	5	0.041397154	0.868917577	-2.9946	6	22	active	0.943640419	True
Aotus_nancymaae	KZ196935.1.tRNA7-ValTAC	KZ196935.1	81956	82029	-	4	-23.6	80.5	1.141410959	15	0.051746442	0.936883629	-3.2242	4	20	active	0.987597437	True
Aotus_nancymaae	KZ196935.1.tRNA8-ValTAC	KZ196935.1	81604	81677	-	4	-23.6	80.5	1.105876712	16	0.04915912	0.844645551	-3.16805	4	20	active	0.987597437	True
Aotus_nancymaae	KZ197370.1.tRNA1-ArgTCT	KZ197370.1	641456	641541	+	5	-30.7	71.1	1.658958904	3	0.085350318	0.911854103	0.76955	0	24	active	0.965769215	True
Aotus_nancymaae	KZ197721.1.tRNA1-ValAAC	KZ197721.1	421155	421228	-	6	-24.7	79.4	1.534479452	10	0.043984476	0.78716009	-5.60515	0	36	active	0.988879979	True
Aotus_nancymaae	KZ198077.1.tRNA1-ThrCGT	KZ198077.1	3336377	3336449	-	5	-27.3	78.3	1.24825	29	0.103626943	0.863689777	0.1903	0	12	active	0.933481691	True
Aotus_nancymaae	KZ198225.1.tRNA2-AlaTGC	KZ198225.1	2636188	2636260	+	8	-26.5	78.7	0.782138889	3	0.047927461	0.707070707	-3.1584	2	33	active	0.987710313	True
Aotus_nancymaae	KZ198225.1.tRNA4-PheGAA	KZ198225.1	2628849	2628922	-	10	-21.9	88.9	1.327657534	7	0.034928849	0.444059977	-2.9335	3	34	active	0.983728739	True
Aotus_nancymaae	KZ198225.1.tRNA5-AspGTC	KZ198225.1	2628311	2628383	-	8	-26.4	66.5	1.530041667	11	0.022020725	0.525426909	-4.44525	3	34	active	0.98363998	True
Aotus_nancymaae	KZ198225.1.tRNA6-AlaTGC	KZ198225.1	2622353	2622425	-	8	-26.5	79.7	1.337430556	6	0.015544041	0.40257649	-2.87825	2	36	active	0.740853325	True
Aotus_nancymaae	KZ198639.1.tRNA1-HisGTG	KZ198639.1	7999	8071	+	8	-25.5	60.1	0.193833333	28	0.069948187	0.839328537	-0.654	0	0	active	0.902841219	True
Aotus_nancymaae	KZ198639.1.tRNA2-GlyCCC	KZ198639.1	18000	18071	+	3	-19.2	66.5	-0.442521127	11	0.009079118	0.179487179	-0.7119	0	0	inactive	-0.874363864	True
Aotus_nancymaae	KZ198733.1.tRNA1-GluTTC	KZ198733.1	42739	42811	-	10	-19.7	63.4	?	1	0.023316062	0.294392523	?	1	12	active	0.808535345	True
Aotus_nancymaae	KZ198733.1.tRNA3-GluTTC	KZ198733.1	37276	37348	-	10	-26.6	70.7	?	1	0.016839378	0.177484787	?	1	12	active	0.556759265	True
Aotus_nancymaae	KZ199127.1.tRNA1-PheGAA	KZ199127.1	58717	58790	+	10	-21.9	88.9	0.623972603	12	0.034928849	0.942011255	-1.5214	3	17	active	0.982690119	True
Aotus_nancymaae	KZ199127.1.tRNA10-AlaTGC	KZ199127.1	180863	180935	+	8	-28.5	68.4	0.219277778	8	0.03238342	0.407925408	-2.415684211	3	10	active	0.971793219	True
Aotus_nancymaae	KZ199127.1.tRNA11-AlaAGC	KZ199127.1	182369	182441	+	14	-28.9	76.4	-0.147736111	6	0.016839378	0.270897833	-2.2301	3	9	inactive	-0.514603224	True
Aotus_nancymaae	KZ199127.1.tRNA12-PheGAA	KZ199127.1	189877	189950	+	10	-21.9	88.9	0.191150685	4	0.029754204	0.578649032	-2.03475	3	6	active	0.975537758	True
Aotus_nancymaae	KZ199127.1.tRNA14-AlaTGC	KZ199127.1	199417	199489	+	8	-28.5	80.5	0.197708333	8	0.033678756	0.540494166	-2.0342	2	5	active	0.97703271	True
Aotus_nancymaae	KZ199127.1.tRNA16-AlaAGC	KZ199127.1	215083	215155	+	14	-29	84.4	0.416861111	20	0.027202073	0.42865891	-0.8123	2	5	active	0.924872093	True
Aotus_nancymaae	KZ199127.1.tRNA18-AlaCGC	KZ199127.1	246001	246073	+	4	-26.5	79.7	1.138944444	10	0.033678756	0.765306122	-2.80885	0	5	active	0.974260143	True
Aotus_nancymaae	KZ199127.1.tRNA19-AlaAGC	KZ199127.1	257228	257300	+	14	-23.6	76.1	0.889138889	3	0.018134715	0.266227181	-3.77465	0	5	active	0.768541737	True
Aotus_nancymaae	KZ199127.1.tRNA2-MetCAT	KZ199127.1	67204	67277	+	15	-25.8	77.4	1.052027397	7	0.034928849	0.8125	-3.1306	6	17	active	0.988031119	True
Aotus_nancymaae	KZ199127.1.tRNA20-AlaAGC	KZ199127.1	233445	233517	-	14	-29.9	73.4	-0.175361111	91	0.016839378	0.076385858	-1.66565	1	5	inactive	-0.580817305	True
Aotus_nancymaae	KZ199127.1.tRNA21-ThrAGT	KZ199127.1	225271	225345	-	8	-27	82.9	0.032837838	49	0.019379845	0.569846955	-2.3449	2	5	active	0.851456466	True
Aotus_nancymaae	KZ199127.1.tRNA23-AlaCGC	KZ199127.1	220170	220242	-	4	-25.7	76.1	-0.177180556	8	0.027202073	0.526227865	-5.3254375	2	5	active	0.907162869	True
Aotus_nancymaae	KZ199127.1.tRNA24-LysTTT	KZ199127.1	208568	208641	-	11	-26	86.8	0.037534247	13	0.042690815	1.018478103	-2.32265	2	5	active	0.928489923	True
Aotus_nancymaae	KZ199127.1.tRNA25-ArgCCG	KZ199127.1	133944	134017	-	4	-27.1	67	0.420383562	4	0.03622251	0.705645161	-1.67845	0	10	active	0.980635134	True
Aotus_nancymaae	KZ199127.1.tRNA26-LeuCAA	KZ199127.1	77513	77619	-	5	-39.1	73.6	0.696630952	6	0.050868486	1.031746032	-1.9986	4	17	active	0.982806106	True
Aotus_nancymaae	KZ199127.1.tRNA27-MetCAT	KZ199127.1	73651	73724	-	15	-25.8	77.4	1.113890411	9	0.025873221	0.670103093	-2.52775	5	17	active	0.987304071	True
Aotus_nancymaae	KZ199127.1.tRNA28-LysTTT	KZ199127.1	69746	69819	-	11	-21.3	83.1	0.239849315	54	0.016817594	0.628044091	-2.3487	5	17	active	0.826887889	True
Aotus_nancymaae	KZ199127.1.tRNA29-GluCTC	KZ199127.1	58197	58269	-	6	-26.4	73.2	0.876013889	5	0.031088083	0.775365529	-3.0967	3	17	active	0.986261979	True
Aotus_nancymaae	KZ199127.1.tRNA3-LeuAAG	KZ199127.1	74587	74669	+	6	-30.7	74.8	0.634926829	6	0.046035806	0.752266143	-2.4331	5	17	active	0.986186268	True
Aotus_nancymaae	KZ199127.1.tRNA30-LeuAAG	KZ199127.1	50821	50903	-	6	-28.4	72.1	0.640914634	5	0.047314578	0.827205882	-2.43155	2	17	active	0.986228155	True
Aotus_nancymaae	KZ199127.1.tRNA4-GlnCTG	KZ199127.1	77012	77084	+	9	-24.7	71.5	1.131958333	12	0.031088083	0.583333333	-3.5164	5	17	active	0.987237324	True
Aotus_nancymaae	KZ199127.1.tRNA5-LeuCAA	KZ199127.1	119552	119657	+	5	-40.6	76.9	1.211722892	5	0.053416149	0.853658537	-2.7675	0	9	active	0.982613087	True
Aotus_nancymaae	KZ199127.1.tRNA6-AlaAGC	KZ199127.1	145771	145843	+	14	-31.9	84.7	1.083222222	1	0.050518135	1.053398058	-3.00495	0	12	active	0.982941742	True
Aotus_nancymaae	KZ199127.1.tRNA7-AlaAGC	KZ199127.1	164158	164230	+	14	-31.9	84.7	0.928972222	5	0.063471503	1.042968375	-4.3968	0	12	active	0.985733986	True
Aotus_nancymaae	KZ199127.1.tRNA9-PheGAA	KZ199127.1	177336	177409	+	10	-14.5	54.5	0.255136986	13	0.016817594	0.349860056	-1.91105	2	10	inactive	-0.636046488	True
Aotus_nancymaae	KZ199231.1.tRNA2-CysGCA	KZ199231.1	1851435	1851507	+	19	-26.1	81.9	1.618152778	8	0.033678756	0.70306038	-2.3662	0	58	active	0.982497865	True
Aotus_nancymaae	KZ199231.1.tRNA3-CysGCA	KZ199231.1	2127152	2127224	+	19	-23.9	81.8	1.520236111	7	0.044041451	0.611213235	-1.7556	1	31	active	0.982416779	True
Aotus_nancymaae	KZ199231.1.tRNA4-CysGCA	KZ199231.1	2137636	2137708	+	19	-26.1	77.3	0.999569444	11	0.007772021	0	-1.4069	1	33	inactive	-0.759097948	True
Aotus_nancymaae	KZ199231.1.tRNA5-CysGCA	KZ199231.1	2161703	2161775	+	19	-26.1	72.8	0.998375	7	0.010362694	0.274984287	-2.91545	0	40	inactive	-0.658557507	True
Aotus_nancymaae	KZ199231.1.tRNA6-AsnGTT	KZ199231.1	2231643	2231717	+	17	-26.4	80.9	1.582756757	7	0.056847545	0.930674264	-1.77555	0	63	active	0.985501821	True
Aotus_nancymaae	KZ199231.1.tRNA7-GlnTTG	KZ199231.1	4408117	4408189	+	4	-27.1	72.6	1.595875	10	0.07642487	0.866462793	0.2923	0	28	active	0.967462075	True
Aotus_nancymaae	KZ199231.1.tRNA8-CysGCA	KZ199231.1	2129076	2129148	-	19	-26.1	81.9	1.317708333	3	0.033678756	0.367801597	-3.2486	2	32	active	0.905909819	True
Aotus_nancymaae	KZ199354.1.tRNA1-ThrTGT	KZ199354.1	12	85	+	7	-30.4	78	1.443958333	25	0.057471264	3	-5.625454545	0	0	active	0.959093706	True
Aotus_nancymaae	KZ199354.1.tRNA2-TyrGTA	KZ199354.1	1599	1688	+	11	-28.9	75.5	0.94590411	10	0.045627376	0.639372448	-4.06435	0	0	active	0.960086169	True
Aotus_nancymaae	KZ199354.1.tRNA3-ProTGG	KZ199354.1	2340	2412	+	6	-23.4	57.2	1.52384058	12	0.03626943	0.644736842	-3.61705	0	0	active	0.886308507	True
Aotus_nancymaae	KZ199481.1.tRNA2-IleTAT	KZ199481.1	3667068	3667161	-	5	-29.5	73.2	1.414986486	6	0.097099622	0.998785671	0.3835	0	26	active	0.96588572	True
Aotus_nancymaae	KZ199521.1.tRNA1-LeuTAA	KZ199521.1	2177658	2177741	-	2	-32.3	88.7	1.329783133	8	0.083014049	1.036358628	-1.82585	0	10	active	0.906364092	True
Aotus_nancymaae	KZ199586.1.tRNA1-ArgCCG	KZ199586.1	879979	880052	+	4	-29	64.9	1.65909589	11	0.059508409	0.939941406	0.30045	0	22	active	0.966729974	True
Aotus_nancymaae	KZ199586.1.tRNA2-ArgCCT	KZ199586.1	10546792	10546865	+	4	-32.1	72.3	1.321205479	14	0.050452781	0.612764603	-3.18515	2	53	active	0.987541408	True
Aotus_nancymaae	KZ199586.1.tRNA3-ArgTCG	KZ199586.1	10548302	10548375	+	4	-25.9	68.8	0.232684932	5	0.053040103	0.715955582	-1.45735	2	53	active	0.980951362	True
Aotus_nancymaae	KZ199586.1.tRNA5-ArgCCT	KZ199586.1	10547615	10547688	-	4	-32.1	71.1	0.829876712	27	0.069857697	0.943627451	-3.0022	2	54	active	0.986128791	True
Aotus_nancymaae	KZ199641.1.tRNA1-MetCAT	KZ199641.1	2872076	2872149	+	15	-25	77.4	0.249452055	8	0.122897801	1.027551942	-0.51115	0	31	active	0.893661391	True
Aotus_nancymaae	KZ199660.1.tRNA1-GlyCCC	KZ199660.1	1512337	1512408	-	3	-31.4	75.1	1.288577465	6	0.046692607	0.733752621	-3.5978	0	39	active	0.961250339	True
Aotus_nancymaae	KZ199674.1.tRNA1-UndetNNN	KZ199674.1	19541	19612	+	2	-22.6	66.7	-0.08056338	5	0.022049287	0.303030303	-2.62395	0	0	active	0.677815309	True
Aotus_nancymaae	KZ199678.1.tRNA1-GluTTC	KZ199678.1	199966	200038	-	10	-24.8	66	0.708111111	10	0.044041451	0.615681019	-2.0221	1	60	active	0.984858695	True
Aotus_nancymaae	KZ199678.1.tRNA2-GluTTC	KZ199678.1	196190	196262	-	10	-24.8	70.4	0.696	10	0.044041451	0.602854331	-2.0694	1	60	active	0.985576068	True
Aotus_nancymaae	KZ200118.1.tRNA1-TrpCCA	KZ200118.1	606791	606863	-	7	-18.4	65.9	0.477791667	78	0.024611399	0.426680599	-1.80995	0	63	active	0.787779888	True
Aotus_nancymaae	KZ200264.1.tRNA1-ProAGG	KZ200264.1	1723996	1724068	+	12	-29.5	70.2	1.405513889	3	0.066062176	0.770045632	-4.8492	1	5	active	0.97401235	True
Aotus_nancymaae	KZ200264.1.tRNA2-ProTGG	KZ200264.1	1724302	1724374	-	6	-28.9	70.5	1.588472222	3	0.06865285	0.892857143	-4.1193	1	5	active	0.975153337	True
Aotus_nancymaae	KZ200449.1.tRNA1-GlnCTG	KZ200449.1	928058	928130	-	9	-24.7	71.5	1.553722222	6	0.04015544	0.733552032	-2.5375	0	22	active	0.988277468	True
Aotus_nancymaae	KZ200597.1.tRNA1-LeuTAG	KZ200597.1	2356971	2357053	+	3	-30.8	73.9	1.467743902	19	0.040920716	0.843373494	-3.5326	0	38	active	0.950530339	True
Aotus_nancymaae	KZ200597.1.tRNA2-LeuAAG	KZ200597.1	2247689	2247771	-	6	-30.7	74.8	1.575402439	9	0.071611253	0.843780135	-4.6243	0	42	active	0.988466555	True
Aotus_nancymaae	KZ200683.1.tRNA1-LysTTT	KZ200683.1	2926553	2926626	+	11	-21.2	76.3	0.159630137	11	0.014230272	0.142973856	-0.7074	0	0	inactive	-0.864754722	True
Aotus_nancymaae	KZ200683.1.tRNA2-GlyGCC	KZ200683.1	5644738	5644809	+	8	-26.4	81	0.899014085	11	0.015564202	0.171065494	-0.62	2	34	inactive	-0.72982705	True
Aotus_nancymaae	KZ200683.1.tRNA3-GlyGCC	KZ200683.1	5645564	5645635	+	8	-24.5	76.6	0.477225352	11	0.010376135	0.157444894	-0.40105	1	34	inactive	-0.836436057	True
Aotus_nancymaae	KZ200683.1.tRNA4-GlyGCC	KZ200683.1	5635173	5635244	-	8	-26.4	81	1.318887324	12	0.012970169	0.045967954	-0.70295	2	40	inactive	-0.700599516	True
Aotus_nancymaae	KZ200683.1.tRNA5-GlyGCC	KZ200683.1	5634466	5634537	-	8	-24.5	75.5	1.330183099	10	0.022049287	0.26371308	0.06415	1	40	active	0.675280122	True
Aotus_nancymaae	KZ200683.1.tRNA6-MetCAT	KZ200683.1	4988968	4989041	-	15	-26.7	82.7	0.637109589	4	0.058214748	0.796529408	-1.7789	0	31	active	0.983680158	True
Aotus_nancymaae	KZ200784.1.tRNA1-GlnCTG	KZ200784.1	19896	19968	+	9	-24.7	70.9	0.932428571	11	0.016839378	0.380269448	-2.08975	0	0	active	0.544765674	True
Aotus_nancymaae	KZ200784.1.tRNA2-SerTGA	KZ200784.1	21851	21933	-	4	-32.8	90.4	0.423	1	0.044757033	0.838779956	-2.324157895	0	0	active	0.958131252	True
Aotus_nancymaae	KZ200795.1.tRNA1-GluCTC	KZ200795.1	1206326	1206398	+	6	-26.4	73.2	1.337569444	7	0.020725389	0.21905805	-3.866	3	47	active	0.86836994	True
Aotus_nancymaae	KZ200795.1.tRNA2-GlyTCC	KZ200795.1	1207823	1207895	+	5	-25.1	73.8	1.325777778	7	0.019430052	0.17447657	-3.2428	3	46	active	0.811311817	True
Aotus_nancymaae	KZ200795.1.tRNA3-HisGTG	KZ200795.1	1208765	1208837	+	8	-25.5	60.1	1.311597222	26	0.054404145	0.871253609	-1.14285	3	44	active	0.982860921	True
Aotus_nancymaae	KZ200795.1.tRNA4-LysCTT	KZ200795.1	1209774	1209847	+	12	-28	87.8	1.159027397	5	0.031047865	0.36523554	-4.00125	3	42	active	0.944706281	True
Aotus_nancymaae	KZ200795.1.tRNA5-AsnGTT	KZ200795.1	1239606	1239680	+	17	-26.7	83.4	0.103945946	11	0.055555556	0.852272727	-0.99655	1	40	active	0.978804729	True
Aotus_nancymaae	KZ200795.1.tRNA6-AsnGTT	KZ200795.1	1242754	1242828	+	17	-26.4	80.9	0	12	0.045219638	0.623885918	0	1	36	active	0.815104797	True
Aotus_nancymaae	KZ200795.1.tRNA7-GluTTC	KZ200795.1	1271771	1271843	+	10	-22.8	59.5	0.054013889	2	0.06865285	0.719099277	-2.31215	0	25	active	0.90016254	True
Aotus_nancymaae	KZ200795.1.tRNA8-AsnGTT	KZ200795.1	1306090	1306164	+	17	-26.4	80.9	0	12	0.054263566	0.721153846	0	0	22	active	0.80675848	True
Aotus_nancymaae	KZ200870.1.tRNA1-AlaTGC	KZ200870.1	14240	14312	+	8	-26.5	78.7	0.782138889	3	0.047927461	0.797101449	-3.2278	1	2	active	0.973263078	True
Aotus_nancymaae	KZ200870.1.tRNA2-AspGTC	KZ200870.1	13923	13995	-	8	-26.4	66.5	0.767875	10	0.049222798	0.647390966	-2.51265	1	2	active	0.979868367	True
Aotus_nancymaae	KZ200874.1.tRNA1-SerTGA	KZ200874.1	2287534	2287616	-	4	-34.9	94	1.566560976	18	0.054987212	0.956477733	-2.57125	0	7	active	0.985181081	True
Aotus_nancymaae	KZ200874.1.tRNA2-TyrGTA	KZ200874.1	1173832	1173925	-	11	-21.9	55	?	12	0.042875158	0.640484234	?	0	30	active	0.752369851	True
Aotus_nancymaae	KZ200996.1.tRNA1-SerGCT	KZ200996.1	3317711	3317793	+	8	-30.7	89.1	1.643231707	6	0.067774936	0.956411624	-2.6191	0	56	active	0.9881924	True
Aotus_nancymaae	KZ200999.1.tRNA1-GluTTC	KZ200999.1	905621	905693	+	10	-23.6	62.7	0	108	0.010362694	0.358056266	0.02805	0	96	inactive	-0.783223716	True
Aotus_nancymaae	KZ201035.1.tRNA1-HisGTG	KZ201035.1	3373228	3373300	+	8	-25.5	60.1	1.507902778	30	0.037564767	0.626711607	0.0655	2	65	active	0.942743091	True
Aotus_nancymaae	KZ201035.1.tRNA2-HisGTG	KZ201035.1	3372478	3372550	-	8	-25.5	60.1	1.626986111	33	0.050518135	0.721153846	-0.1609	2	63	active	0.963371046	True
Aotus_nancymaae	KZ201035.1.tRNA3-HisGTG	KZ201035.1	3370666	3370738	-	8	-25.5	60.1	1.522180556	34	0.053108808	0.722826087	0.4616	2	64	active	0.961053456	True
Aotus_nancymaae	KZ201075.1.tRNA1-ValAAC	KZ201075.1	11594	11667	+	6	-24.7	79.4	-0.00090411	11	0.038809832	0.26119403	-1.241842105	0	0	active	0.672529295	True
Aotus_nancymaae	KZ201190.1.tRNA1-GluCTC	KZ201190.1	7349050	7349122	+	6	-34.1	73.5	?	4	0.038860104	0.709030814	?	0	3	active	0.970236023	True
Aotus_nancymaae	KZ201203.1.tRNA1-AsnGTT	KZ201203.1	17757	17831	+	17	-26.2	79.7	?	11	0.051679587	0.754366407	?	0	3	active	0.975358246	True
Aotus_nancymaae	KZ201203.1.tRNA2-GlnCTG	KZ201203.1	1422	1494	-	9	-24.2	71.1	-0.0175	28	0.042746114	0.560897436	-0.88675	0	3	active	0.854288382	True
Aotus_nancymaae	KZ201374.1.tRNA1-SerAGA	KZ201374.1	425047	425129	-	9	-32.8	89.6	1.47895122	12	0.061381074	0.741283806	-0.67875	0	7	active	0.953859884	True
Aotus_nancymaae	KZ201537.1.tRNA2-MetCAT	KZ201537.1	5615263	5615336	+	15	-25	82.3	1.000164384	6	0.062095731	1.029136594	-2.23325	0	28	active	0.984238663	True
Aotus_nancymaae	KZ201570.1.tRNA1-AsnGTT	KZ201570.1	17517	17591	-	17	-24.3	68.7	0	11	0.010335917	0	-0.006	0	0	inactive	-0.910256406	True
Aotus_nancymaae	KZ201810.1.tRNA1-ArgTCT	KZ201810.1	9467071	9467162	-	5	-32.6	69.9	0.278123288	39	0.048040455	0.696517413	-2.44085	0	55	active	0.974470495	True
Aotus_nancymaae	KZ201875.1.tRNA2-HisGTG	KZ201875.1	190469	190541	+	8	-18.9	54.1	0.285916667	28	0.025906736	0.302768166	-0.43455	1	35	inactive	-0.612796909	True
Aotus_nancymaae	KZ201875.1.tRNA3-GlnCTG	KZ201875.1	180704	180776	-	9	-22.8	65.6	-0.0175	28	0.022020725	0.171065494	-0.6184	1	30	inactive	-0.631348283	True
Aotus_nancymaae	KZ201976.1.tRNA2-AlaAGC	KZ201976.1	176179	176251	-	14	-29	83.3	0.105125	6	0.007772021	0	0.00685	0	15	inactive	-0.69090426	True
Aotus_nancymaae	KZ202009.1.tRNA1-ArgTCG	KZ202009.1	1676504	1676577	-	4	-29.2	74.8	1.495876712	15	0.08538163	0.90230037	-2.0344	0	61	active	0.98331948	True
Aotus_nancymaae	KZ202076.1.tRNA3-TyrGTA	KZ202076.1	11518556	11518645	-	11	-29.4	77.9	1.618616438	9	0.055766793	0.837113402	-3.54025	1	78	active	0.988402717	True
Aotus_nancymaae	KZ202076.1.tRNA4-AlaAGC	KZ202076.1	11518140	11518213	-	14	-32	59.7	1.631835616	6	0.043984476	0.514705882	-2.51745	1	78	active	0.987365273	True
Aotus_nancymaae	KZ202154.1.tRNA1-GluTTC	KZ202154.1	2306055	2306127	+	10	-26.7	71.2	1.417347222	8	0.064766839	1.098556183	-4.0568	0	0	active	0.958727326	True
Aotus_nancymaae	KZ202201.1.tRNA1-LysTTT	KZ202201.1	3062312	3062385	+	11	-25.1	84.4	0.150479452	9	0.007761966	0.215849522	-0.0395	0	3	inactive	-0.78586204	True
Aotus_nancymaae	KZ202208.1.tRNA10-GlyTCC	KZ202208.1	1277147	1277219	+	5	-25.1	73.8	1.089486111	7	0.045336788	0.418360029	-2.4551	6	106	active	0.978960217	True
Aotus_nancymaae	KZ202208.1.tRNA11-IleAAT	KZ202208.1	1283302	1283376	-	9	-25.5	81.2	1.273783784	9	0.034883721	0.324434557	-4.16115	6	98	active	0.931028421	True
Aotus_nancymaae	KZ202208.1.tRNA12-SerAGA	KZ202208.1	1282942	1283024	-	9	-32.8	89.6	1.38554878	5	0.037084399	0.744680851	-4.88385	6	98	active	0.987639337	True
Aotus_nancymaae	KZ202208.1.tRNA13-ThrAGT	KZ202208.1	1282567	1282641	-	8	-27.3	82.6	1.332067568	22	0.018087855	0.453535728	-3.2921	6	100	active	0.911331347	True
Aotus_nancymaae	KZ202208.1.tRNA14-ProCGG	KZ202208.1	1278480	1278552	-	4	-29.5	70.2	1.429013889	8	0.062176166	0.758965805	-2.88745	6	106	active	0.985525676	True
Aotus_nancymaae	KZ202208.1.tRNA15-AspGTC	KZ202208.1	1277863	1277935	-	8	-26.4	66.5	1.422986111	12	0.03626943	0.484496124	-4.69645	6	106	active	0.987920038	True
Aotus_nancymaae	KZ202208.1.tRNA16-TrpCCA	KZ202208.1	1276458	1276530	-	7	-24.5	73.4	1.100263889	12	0.033678756	0.466200466	-3.75415	6	106	active	0.987845028	True
Aotus_nancymaae	KZ202208.1.tRNA19-SerCGA	KZ202208.1	1201940	1202022	-	3	-34	95.1	1.54995122	7	0.046035806	0.707785642	-0.78475	0	85	active	0.932507385	True
Aotus_nancymaae	KZ202208.1.tRNA2-LysTTT	KZ202208.1	1184606	1184679	+	11	-27.5	87.8	1.629561644	7	0.033635188	0.560504454	-5.0892	4	91	active	0.988193096	True
Aotus_nancymaae	KZ202208.1.tRNA20-LeuTAG	KZ202208.1	1185689	1185771	-	3	-33.3	75.2	1.606560976	8	0.037084399	0.674188222	-2.69545	4	92	active	0.956628237	True
Aotus_nancymaae	KZ202208.1.tRNA3-GlnCTG	KZ202208.1	1185172	1185244	+	9	-24.7	71.5	1.375263889	5	0.020725389	0.520833333	-4.4719	4	92	active	0.969324738	True
Aotus_nancymaae	KZ202208.1.tRNA4-ArgTCT	KZ202208.1	1186293	1186381	+	5	-27.8	70.8	1.523835616	1	0.043147208	0.699259607	-0.31465	4	92	active	0.966595412	True
Aotus_nancymaae	KZ202208.1.tRNA5-GlyGCC	KZ202208.1	1191105	1191176	+	8	-26.4	81	0.993211268	9	0.054474708	0.644257703	-3.33975	4	97	active	0.987482122	True
Aotus_nancymaae	KZ202208.1.tRNA6-TrpCCA	KZ202208.1	1246936	1247008	+	7	-25.1	73.3	1.547486111	10	0.059585492	0.535553555	-1.8325	3	110	active	0.986359083	True
Aotus_nancymaae	KZ202208.1.tRNA7-SerGCT	KZ202208.1	1247433	1247515	+	8	-30.7	88.4	1.590341463	27	0.056265985	0.741997032	-3.48235	3	111	active	0.988553249	True
Aotus_nancymaae	KZ202208.1.tRNA8-ThrAGT	KZ202208.1	1247733	1247807	+	8	-27.3	82.6	0.686067568	16	0.042635659	0.739957717	-4.1061	3	112	active	0.987377249	True
Aotus_nancymaae	KZ202208.1.tRNA9-IleAAT	KZ202208.1	1248170	1248244	+	9	-25.5	81.2	1.619716216	12	0.034883721	0.658119658	-5.5991	3	113	active	0.988853993	True
Aotus_nancymaae	KZ202233.1.tRNA2-TrpCCA	KZ202233.1	296806	296878	-	7	-25.1	75.1	1.235833333	10	0.088082902	0.989985475	-2.22105	0	18	active	0.983008887	True
Aotus_nancymaae	KZ202257.1.tRNA1-ValTAC	KZ202257.1	4089037	4089110	+	4	-23.6	82.9	1.219465753	17	0.072445019	0.868544601	-5.24335	0	19	active	0.98733698	True
Aotus_nancymaae	KZ202280.1.tRNA1-LeuAAG	KZ202280.1	7967300	7967382	+	6	-30.7	74.8	1.250231707	14	0.049872123	0.844854071	-3.7834	4	22	active	0.98829656	True
Aotus_nancymaae	KZ202280.1.tRNA10-ThrTGT	KZ202280.1	8000191	8000264	-	7	-29.1	78.8	0.269383562	13	0.014230272	0.573300573	-3.20105	3	23	active	0.749545516	True
Aotus_nancymaae	KZ202280.1.tRNA11-TyrGTA	KZ202280.1	7999455	7999546	-	11	-29.6	73.2	-0.104863014	11	0.02528445	0.582524272	-4.5015	3	21	active	0.912384258	True
Aotus_nancymaae	KZ202280.1.tRNA12-ThrTGT	KZ202280.1	7982135	7982208	-	7	-29.7	78.8	1.292575342	5	0.03622251	0.372907154	-3.5979	4	18	active	0.956462529	False
Aotus_nancymaae	KZ202280.1.tRNA13-ProAGG	KZ202280.1	7981751	7981823	-	12	-29.5	70.2	1.18225	2	0.033678756	0.778162055	-4.1722	4	18	active	0.98804973	False
Aotus_nancymaae	KZ202280.1.tRNA14-ProAGG	KZ202280.1	7978803	7978875	-	12	-29.5	70.2	0.958097222	3	0.03626943	0.833333333	-3.3382	6	18	active	0.986835688	False
Aotus_nancymaae	KZ202280.1.tRNA16-ProAGG	KZ202280.1	7975616	7975688	-	12	-29.5	70.2	1.18225	2	0.033678756	0.760869565	-4.1722	8	17	active	0.933265006	True
Aotus_nancymaae	KZ202280.1.tRNA17-ThrTGT	KZ202280.1	7969884	7969957	-	7	-29.7	78.8	1.320493151	5	0.03622251	0.372907154	-3.5979	6	21	active	0.956525275	False
Aotus_nancymaae	KZ202280.1.tRNA18-ProAGG	KZ202280.1	7969500	7969572	-	12	-29.5	70.2	1.18225	2	0.033678756	0.778162055	-4.1722	6	21	active	0.987782451	False
Aotus_nancymaae	KZ202280.1.tRNA19-ProAGG	KZ202280.1	7966552	7966624	-	12	-29.5	70.2	0.958097222	3	0.03626943	0.833333333	-3.3382	4	23	active	0.987102968	False
Aotus_nancymaae	KZ202280.1.tRNA2-LeuAAG	KZ202280.1	7979551	7979633	+	6	-30.7	74.8	1.250231707	14	0.049872123	0.814765547	-3.78365	6	18	active	0.988029281	True
Aotus_nancymaae	KZ202280.1.tRNA3-LeuTAG	KZ202280.1	7994082	7994164	+	3	-29.2	73.7	0.952207317	8	0.038363171	0.712962963	-3.77915	3	20	active	0.957956957	True
Aotus_nancymaae	KZ202280.1.tRNA4-ProTGG	KZ202280.1	8002352	8002424	+	6	-29.5	74.9	0.347638889	125	0.033678756	0.550629291	-3.2489	3	23	active	0.923451793	True
Aotus_nancymaae	KZ202280.1.tRNA6-ArgACG	KZ202280.1	9883907	9883980	+	6	-25.4	67.6	1.580986301	14	0.043984476	0.877742947	-3.12805	0	78	active	0.988194231	True
Aotus_nancymaae	KZ202280.1.tRNA7-TyrGTA	KZ202280.1	8043388	8043482	-	11	-29.3	75.3	0	12	0.034005038	0.561214865	0	1	25	active	0.793817838	True
Aotus_nancymaae	KZ202280.1.tRNA9-TyrGTA	KZ202280.1	8037786	8037880	-	11	-29.1	74.3	0.321955882	12	0.031486146	0.378750615	-0.6432	1	26	active	0.814943921	True
Aotus_nancymaae	KZ202319.1.tRNA1-CysGCA	KZ202319.1	3683327	3683399	-	19	-26.1	77.3	0.987444444	9	0.007772021	0.102564103	-3.04815	0	30	inactive	-0.721975266	True
Aotus_nancymaae	KZ202344.1.tRNA2-GluTTC	KZ202344.1	1552298	1552370	-	10	-26.9	73.2	0	135	0.012953368	0.284090909	0.0765	0	38	inactive	-0.783446923	True
Aotus_nancymaae	KZ202359.1.tRNA1-IleAAT	KZ202359.1	6260862	6260936	+	9	-25.5	81.2	1.004486486	8	0.068475452	0.839591156	-3.258	0	32	active	0.987590243	True
Aotus_nancymaae	KZ202524.1.tRNA3-AspGTC	KZ202524.1	25988216	25988288	-	8	-26.4	66.5	1.628722222	12	0.04015544	0.821382008	-2.7375	0	45	active	0.988134584	True
Aotus_nancymaae	KZ202524.1.tRNA4-AspGTC	KZ202524.1	23508751	23508823	-	8	-26.4	65.4	1.060777778	11	0.045336788	0.49247221	-3.8114	1	16	active	0.987253284	True
Aotus_nancymaae	KZ202524.1.tRNA5-TrpCCA	KZ202524.1	23508022	23508094	-	7	-25.1	74.3	1.615625	4	0.04015544	0.654853621	0.6868	1	16	active	0.947376994	True
Aotus_nancymaae	KZ202628.1.tRNA1-GluCTC	KZ202628.1	1170359	1170431	-	6	-26.4	73.2	1.167819444	52	0.028497409	0.873907615	-3.68365	0	11	active	0.965452779	True
Aotus_nancymaae	KZ202868.1.tRNA1-HisGTG	KZ202868.1	2600262	2600334	+	8	-25.5	60.1	0.950986111	13	0.024611399	0.465337132	-0.1428	0	1	active	0.835142303	True
Aotus_nancymaae	KZ202962.1.tRNA1-ArgACG	KZ202962.1	2746085	2746158	-	6	-23.1	64.2	1.507150685	9	0.071151358	1.054526749	-3.15065	0	32	active	0.983635893	True
Aotus_nancymaae	KZ203018.1.tRNA1-LysCTT	KZ203018.1	3537871	3537944	+	12	-25.6	74.1	-0.014452055	322	0.006468305	0	-0.078	0	19	inactive	-0.930931979	True
Aotus_nancymaae	KZ203102.1.tRNA1-GluTTC	KZ203102.1	4370448	4370520	+	10	-26.7	71.2	1.642902778	8	0.042746114	0.891265597	-4.03725	0	12	active	0.98718628	True
Aotus_nancymaae	KZ203181.1.tRNA1-iMetCAT	KZ203181.1	606613	606685	-	15	-26.1	60.4	1.608430556	6	0.050518135	0.883838384	-2.7875	0	73	active	0.987694491	True
Aotus_nancymaae	KZ203209.1.tRNA1-ValCAC	KZ203209.1	546899	546972	+	7	-24.7	79.4	1.389136986	5	0.065976714	0.860796852	-3.2354	1	28	active	0.988535876	True
Aotus_nancymaae	KZ203209.1.tRNA3-ValAAC	KZ203209.1	551032	551105	+	6	-24.7	79.4	0.657534247	11	0.041397154	0.682261209	-3.57095	1	29	active	0.987567676	True
Aotus_nancymaae	KZ203209.1.tRNA4-ThrTGT	KZ203209.1	582745	582818	+	7	-29.7	78.8	1.53209589	8	0.084087969	1.031187123	-3.7238	1	31	active	0.986572974	True
Aotus_nancymaae	KZ203209.1.tRNA5-ProTGG	KZ203209.1	585521	585593	+	6	-29.5	70.3	0.902833333	2	0.051813472	0.845410628	-3.23445	1	31	active	0.98727355	True
Aotus_nancymaae	KZ203209.1.tRNA7-AlaTGC	KZ203209.1	562272	562344	-	8	-26.5	79.7	1.332305556	6	0.042746114	0.647634153	-3.4179	1	30	active	0.988337237	True
Aotus_nancymaae	KZ203209.1.tRNA8-LysCTT	KZ203209.1	561723	561796	-	12	-28	87.8	1.052575342	10	0.031047865	0.693597561	-3.69035	1	30	active	0.987038066	True
Aotus_nancymaae	KZ203424.1.tRNA1-IleTAT	KZ203424.1	151194	151287	+	5	-28	73.8	1.480581081	3	0.044136192	0.758861237	-0.01295	0	96	active	0.965026845	True
Aotus_nancymaae	KZ203430.1.tRNA1-AsnGTT	KZ203430.1	17642	17716	-	17	-24.1	70.8	0	12	0.034883721	0.518112156	0	0	0	active	0.721116948	True
Aotus_nancymaae	KZ203443.1.tRNA1-AsnGTT	KZ203443.1	963078	963152	+	17	-26.4	80.9	0.956148649	11	0.087855297	0.833333333	-2.04925	1	61	active	0.983219976	True
Aotus_nancymaae	KZ203443.1.tRNA2-GlyTCC	KZ203443.1	4287594	4287666	+	5	-25.1	73.8	0.980472222	2	0.07253886	1.05	-4.23565	1	34	active	0.98325743	True
Aotus_nancymaae	KZ203443.1.tRNA6-ValCAC	KZ203443.1	4288132	4288205	-	7	-22.5	80.4	0.195890411	9	0.02457956	0.147960262	-2.717	1	33	active	0.843183371	True
Aotus_nancymaae	KZ203443.1.tRNA7-PheGAA	KZ203443.1	962875	962948	-	10	-21.9	88.9	0.476342466	4	0.063389392	1.211538462	-0.82005	1	61	active	0.964510899	True
Aotus_nancymaae	KZ203456.1.tRNA1-AlaAGC	KZ203456.1	3436071	3436143	+	14	-25.4	59.4	0	115	0.023316062	0.589225589	0.0354	0	0	active	0.597064299	True
Aotus_nancymaae	KZ203698.1.tRNA1-LysTTT	KZ203698.1	30782394	30782467	+	11	-27.5	87.8	0.426013699	7	0.027166882	0.615384615	-3.1037	1	36	active	0.986034097	True
Aotus_nancymaae	KZ203698.1.tRNA2-LysTTT	KZ203698.1	30782862	30782935	-	11	-27.5	87.8	1.362739726	9	0.023285899	0.654885655	-3.44965	1	36	active	0.982545331	True
Aotus_nancymaae	KZ203698.1.tRNA3-ThrTGT	KZ203698.1	12466877	12466950	-	7	-29.1	84.1	0.471452055	12	0.027166882	0.420673077	-2.5571	0	21	active	0.968939829	True
Aotus_nancymaae	KZ203797.1.tRNA1-LeuCAG	KZ203797.1	6294278	6294361	+	5	-32.8	77.3	1.108879518	7	0.047254151	0.702811245	-1.1897	1	19	active	0.981851784	True
Aotus_nancymaae	KZ203797.1.tRNA2-LeuCAG	KZ203797.1	6294757	6294840	-	5	-32.8	77.3	1.43873494	12	0.051085568	0.71885949	-4.40245	1	18	active	0.987092793	True
Aotus_nancymaae	KZ203894.1.tRNA1-CysGCA	KZ203894.1	3327443	3327515	+	19	-26.1	77.3	0.441583333	5	0.024611399	0.678733032	-1.67205	0	29	active	0.973773163	True
Aotus_nancymaae	KZ203894.1.tRNA10-CysGCA	KZ203894.1	3400217	3400288	-	19	-28.8	59.5	0.47143662	237	0.005188067	0.064102564	-1.4388	1	12	inactive	-0.759302147	True
Aotus_nancymaae	KZ203894.1.tRNA11-CysGCA	KZ203894.1	3392527	3392599	-	19	-24.6	74	0.116888889	7	0.007772021	0.219952867	-1.2963	1	12	inactive	-0.865575859	True
Aotus_nancymaae	KZ203894.1.tRNA12-CysGCA	KZ203894.1	3378990	3379062	-	19	-19	55.7	0.276888889	139	0.002590674	0.044388079	-1.495	0	9	inactive	-0.884788988	True
Aotus_nancymaae	KZ203894.1.tRNA13-CysGCA	KZ203894.1	3356455	3356527	-	19	-22.5	79.6	0.271263889	10	0.010362694	0.211967054	-1.57735	0	27	inactive	-0.757221348	True
Aotus_nancymaae	KZ203894.1.tRNA14-CysGCA	KZ203894.1	3309821	3309893	-	19	-24.6	77.2	0.462888889	12	0.002590674	0.050717287	-1.4555	0	55	inactive	-0.801624172	True
Aotus_nancymaae	KZ203894.1.tRNA2-CysGCA	KZ203894.1	3339968	3340040	+	19	-24.6	77.2	0.067861111	21	0.00388601	0.162037037	-1.69985	0	27	inactive	-0.832706611	True
Aotus_nancymaae	KZ203894.1.tRNA4-CysGCA	KZ203894.1	3521695	3521767	+	19	-26.1	77.3	0.346236111	10	0.050518135	0.911458333	-1.34555	0	9	active	0.971315319	True
Aotus_nancymaae	KZ203894.1.tRNA6-CysGCA	KZ203894.1	3551673	3551745	+	19	-24.6	77.2	0.43325	12	0.007772021	0.22172949	-2.1726	0	17	inactive	-0.752489081	True
Aotus_nancymaae	KZ203894.1.tRNA8-CysGCA	KZ203894.1	3566250	3566322	+	19	-24.6	74	0.679208333	4	0.007772021	0.144329897	-1.43345	0	17	inactive	-0.688268008	True
Aotus_nancymaae	KZ203894.1.tRNA9-CysGCA	KZ203894.1	3591927	3591999	-	19	-24.6	81.8	0.465013889	2	0.006476684	0.076103501	-1.35835	0	21	inactive	-0.726759357	True
Aotus_nancymaae	KZ203923.1.tRNA1-ArgCCT	KZ203923.1	5640220	5640293	-	4	-27.2	65.6	1.633465753	7	0.055627426	1.285046729	-1.14015	0	25	active	0.967184945	True
Aotus_nancymaae	KZ204342.1.tRNA1-AsnGTT	KZ204342.1	80515	80589	-	17	-22	77.5	0.126527027	15	0.036175711	0.800915332	-0.9675	0	17	active	0.969837486	True
Aotus_nancymaae	KZ204342.1.tRNA2-ValCAC	KZ204342.1	35256	35329	-	7	-21.7	76	0.234041096	6	0.045278137	0.637755102	-3.271421053	0	7	active	0.979666192	True
Aotus_nancymaae	KZ204342.1.tRNA4-AsnGTT	KZ204342.1	11443	11517	-	17	-26.4	80.9	0.120716216	12	0.058139535	0.695665469	-0.94715	0	4	active	0.964551062	True
Aotus_nancymaae	KZ204371.1.tRNA1-AlaCGC	KZ204371.1	2875627	2875699	+	4	-27.6	74.4	1.666416667	16	0.038860104	0.769230769	-2.476	1	12	active	0.987014602	True
Aotus_nancymaae	KZ204371.1.tRNA2-GlyGCC	KZ204371.1	2876032	2876103	-	8	-26.4	81	1.043309859	9	0.019455253	0.286650287	-4.0846	1	12	active	0.877377488	True
Aotus_nancymaae	KZ204462.1.tRNA1-SerCGA	KZ204462.1	4973522	4973604	+	3	-29.8	89.6	1.616378049	6	0.049872123	0.648869114	-0.87825	0	119	active	0.936158896	True
Aotus_nancymaae	KZ204521.1.tRNA1-LysCTT	KZ204521.1	431366	431439	+	12	-20.1	60.1	?	179	0.01164295	0.295958059	?	0	34	inactive	-0.731634242	True
Aotus_nancymaae	KZ204842.1.tRNA1-iMetCAT	KZ204842.1	507352	507424	+	15	-26.1	60.4	0.304763889	10	0.023316062	0.296179884	-1.63505	0	33	active	0.763577925	True
Aotus_nancymaae	KZ204984.1.tRNA1-CysGCA	KZ204984.1	8084822	8084894	+	19	-24.6	77.2	1.320722222	11	0.001295337	0.072916667	-1.0519	1	4	inactive	-0.847879496	True
Aotus_nancymaae	KZ204984.1.tRNA2-CysGCA	KZ204984.1	8087495	8087567	+	19	-23.8	79.3	1.315527778	9	0.002590674	0	-1.55125	1	4	inactive	-0.777667615	True
Aotus_nancymaae	KZ205017.1.tRNA1-ThrAGT	KZ205017.1	4645667	4645741	+	8	-27.3	82.6	1.575256757	26	0.095607235	0.975269941	-1.67055	0	48	active	0.982733864	True
Aotus_nancymaae	KZ205162.1.tRNA1-IleTAT	KZ205162.1	29165	29259	+	5	-31.3	73.1	0.828054054	3	0.070528967	1.015096304	-1.68105	0	14	active	0.982463147	True
Aotus_nancymaae	KZ205162.1.tRNA10-IleAAT	KZ205162.1	209638	209712	+	9	-25.5	81.2	0.276554054	4	0.015503876	0.122100122	-1.648	2	25	inactive	-0.537465983	True
Aotus_nancymaae	KZ205162.1.tRNA11-ValTAC	KZ205162.1	219403	219476	+	4	-20.5	70.4	0.201068493	8	0.031047865	0.472334683	-1.2929	5	25	active	0.908862845	True
Aotus_nancymaae	KZ205162.1.tRNA12-IleAAT	KZ205162.1	220772	220846	+	9	-25.5	80.2	0.291445946	7	0.021963824	0.45771578	-1.877777778	4	23	active	0.969943436	True
Aotus_nancymaae	KZ205162.1.tRNA13-GlnCTG	KZ205162.1	222259	222331	+	9	-24.9	70	0.495314286	4	0.027202073	0.487616099	-2.958444444	3	23	active	0.984377234	True
Aotus_nancymaae	KZ205162.1.tRNA14-SerGCT	KZ205162.1	225058	225140	+	8	-24.8	77.5	0.005777778	3	0.020460358	0.206043956	-3.191421053	3	22	active	0.750812208	True
Aotus_nancymaae	KZ205162.1.tRNA15-SerAGA	KZ205162.1	345949	346031	+	9	-32.8	89.6	0.762439024	5	0.035805627	0.494505495	-3.11265	1	14	active	0.985731665	True
Aotus_nancymaae	KZ205162.1.tRNA16-AspGTC	KZ205162.1	346749	346821	+	8	-26.4	66.5	0.253180556	11	0.04015544	0.923769601	-1.4695	2	14	active	0.977201545	True
Aotus_nancymaae	KZ205162.1.tRNA17-SerAGA	KZ205162.1	356166	356248	+	9	-32.8	89.6	0.641695122	13	0.037084399	0.743006993	-3.53075	2	12	active	0.986001812	True
Aotus_nancymaae	KZ205162.1.tRNA18-SerAGA	KZ205162.1	358299	358381	+	9	-32.8	89.6	0.576597561	9	0.025575448	0.277722674	-2.55475	1	12	active	0.937668049	True
Aotus_nancymaae	KZ205162.1.tRNA19-GlnCTG	KZ205162.1	370372	370444	+	9	-24.7	71.5	0.825527778	4	0.03626943	0.733368256	-2.4815	1	11	active	0.985533613	True
Aotus_nancymaae	KZ205162.1.tRNA2-ProCGG	KZ205162.1	45857	45929	+	4	-29.5	70.2	0.718222222	6	0.03238342	0.262664165	-2.4916	1	21	active	0.940396652	True
Aotus_nancymaae	KZ205162.1.tRNA20-SerAGA	KZ205162.1	376723	376805	+	9	-32.5	87.9	0.8145	206	0.019181586	0.460299194	-3.56605	3	11	active	0.785833506	True
Aotus_nancymaae	KZ205162.1.tRNA21-SerTGA	KZ205162.1	385171	385249	+	4	-17.8	56.7	0.344307692	1	0.044987147	0.818850267	-2.725052632	3	11	active	0.855722426	True
Aotus_nancymaae	KZ205162.1.tRNA23-LysTTT	KZ205162.1	407573	407646	+	11	-28	86.1	0.306767123	10	0.012936611	0.184859155	-1.5807	1	5	inactive	-0.504166045	True
Aotus_nancymaae	KZ205162.1.tRNA24-ThrCGT	KZ205162.1	585853	585926	+	5	-28.9	76.5	0.676273973	54	0.031047865	0.629084967	-1.818	1	0	active	0.943107465	True
Aotus_nancymaae	KZ205162.1.tRNA25-IleTAT	KZ205162.1	596875	596969	+	5	-34	73.1	-0.087486486	2	0.055415617	0.877926421	-1.28175	0	0	active	0.881952209	True
Aotus_nancymaae	KZ205162.1.tRNA26-PheGAA	KZ205162.1	610885	610958	+	10	-21.9	87.9	0.399123288	4	0.016817594	0.214460784	-1.5178	2	3	active	0.523752935	True
Aotus_nancymaae	KZ205162.1.tRNA29-ThrAGT	KZ205162.1	636291	636365	+	8	-25.2	80.1	0.30927027	194	0.025839793	0.494949495	-0.6713	1	3	active	0.745339726	True
Aotus_nancymaae	KZ205162.1.tRNA3-SerGCT	KZ205162.1	51967	52049	+	8	-30.1	91	0.632292683	9	0.035805627	0.896057348	-1.3799	1	21	active	0.982009706	True
Aotus_nancymaae	KZ205162.1.tRNA30-iMetCAT	KZ205162.1	665061	665133	+	15	-26.1	60.4	0.022728571	7	0.018134715	0.369978858	-4.2747	1	9	active	0.724070501	True
Aotus_nancymaae	KZ205162.1.tRNA32-IleTAT	KZ205162.1	1344903	1344997	+	5	-31.2	73.1	0.628810811	1	0.046599496	0.842426187	-2.4527	1	16	active	0.985695629	True
Aotus_nancymaae	KZ205162.1.tRNA33-GlnTTG	KZ205162.1	1392040	1392112	+	4	-27.1	70	0.435138889	14	0.037564767	0.613362541	-1.33465	1	12	active	0.973761841	True
Aotus_nancymaae	KZ205162.1.tRNA34-AlaAGC	KZ205162.1	1408704	1408776	+	14	-29.9	80.3	0.794097222	4	0.028497409	0.544111932	-1.9137	1	10	active	0.981439915	True
Aotus_nancymaae	KZ205162.1.tRNA35-AlaTGC	KZ205162.1	1439479	1439551	+	8	-21.3	68.9	0.124541667	13	0.010362694	0.315315315	-2.5512	2	5	inactive	-0.593563138	True
Aotus_nancymaae	KZ205162.1.tRNA36-ThrCGT	KZ205162.1	1444127	1444201	-	5	-25.8	77.1	0.980202703	5	0.031007752	0.757575758	-2.96705	1	5	active	0.97490519	True
Aotus_nancymaae	KZ205162.1.tRNA37-AlaTGC	KZ205162.1	1431078	1431150	-	8	-27.5	76.2	0.456763889	311	0.028497409	0.756087981	-2.6516	1	4	active	0.830174054	True
Aotus_nancymaae	KZ205162.1.tRNA38-SerGCT	KZ205162.1	1400663	1400745	-	8	-30.7	88.4	0.913121951	10	0.033248082	0.810185185	-1.8505	2	11	active	0.983495475	True
Aotus_nancymaae	KZ205162.1.tRNA39-ArgTCG	KZ205162.1	1351491	1351564	-	4	-21.3	55.5	0.970027397	8	0.043984476	0.666666667	-2.8236	1	16	active	0.824575384	True
Aotus_nancymaae	KZ205162.1.tRNA4-HisGTG	KZ205162.1	84350	84422	+	8	-25.5	60.1	0.603569444	27	0.033678756	0.623885918	-1.0318	1	26	active	0.974446014	True
Aotus_nancymaae	KZ205162.1.tRNA40-ThrCGT	KZ205162.1	1296929	1297003	-	5	-23.7	78.4	0.840878378	4	0.021963824	0.819672131	-2.4867	0	25	active	0.976812453	True
Aotus_nancymaae	KZ205162.1.tRNA41-LeuAAG	KZ205162.1	1281889	1281971	-	6	-30.7	74.8	0.235743902	58	0.042199488	0.930851064	-1.66395	1	29	active	0.940702171	True
Aotus_nancymaae	KZ205162.1.tRNA42-ThrTGT	KZ205162.1	1277411	1277485	-	7	-24	82.9	0.820297297	5	0.015503876	0.736531987	-2.4887	1	29	active	0.807546155	True
Aotus_nancymaae	KZ205162.1.tRNA43-SerGCT	KZ205162.1	1046324	1046406	-	8	-30.7	88.4	0.892829268	15	0.035805627	0.750858124	-2.43055	0	46	active	0.986468019	True
Aotus_nancymaae	KZ205162.1.tRNA44-GlyGCC	KZ205162.1	814019	814090	-	8	-26.4	81	1.067957746	14	0.051880674	1.080246914	-3.6331	1	22	active	0.988275439	True
Aotus_nancymaae	KZ205162.1.tRNA45-iMetCAT	KZ205162.1	813609	813681	-	15	-26.1	60.4	1.24175	4	0.012953368	0.297619048	-4.1964	1	22	active	0.517879039	True
Aotus_nancymaae	KZ205162.1.tRNA46-GlnTTG	KZ205162.1	673318	673390	-	4	-22	66.9	1.029319444	7	0.019430052	0.46720061	-2.8875	1	10	active	0.956872887	True
Aotus_nancymaae	KZ205162.1.tRNA47-ValAAC	KZ205162.1	651001	651074	-	6	-24.7	79.4	0.474356164	11	0.037516171	0.624442462	-2.5004	0	3	active	0.980703216	True
Aotus_nancymaae	KZ205162.1.tRNA48-ValCAC	KZ205162.1	638727	638800	-	7	-24.2	79	-0.821728571	15	0.032341527	0.49088359	-1.162210526	1	3	active	0.880235297	True
Aotus_nancymaae	KZ205162.1.tRNA5-ThrAGT	KZ205162.1	88175	88249	+	8	-27.8	80.6	1.417216216	11	0.012919897	0.684485007	-2.3713	1	26	active	0.849033923	True
Aotus_nancymaae	KZ205162.1.tRNA50-ThrAGT	KZ205162.1	625812	625886	-	8	-27	81.4	0.549162162	19	0.011627907	0.17369727	-2.66895	2	3	active	0.581035852	True
Aotus_nancymaae	KZ205162.1.tRNA51-ValAAC	KZ205162.1	621929	622002	-	6	-24.7	79.4	0.320835616	17	0.034928849	0.41322314	-2.955263158	2	3	active	0.967492656	True
Aotus_nancymaae	KZ205162.1.tRNA53-ArgACG	KZ205162.1	615954	616027	-	6	-23.1	64.2	0.718643836	12	0.020698577	0.17921147	-3.08365	4	3	active	0.828434865	True
Aotus_nancymaae	KZ205162.1.tRNA54-ValAAC	KZ205162.1	607138	607211	-	6	-23.3	74.8	0.478589041	11	0.020698577	0.239316239	-1.8855	2	3	active	0.801692839	True
Aotus_nancymaae	KZ205162.1.tRNA56-LeuCAA	KZ205162.1	579660	579767	-	5	-38.8	75.9	0.20847619	5	0.029739777	0.576923077	-1.0188	3	0	active	0.946467065	True
Aotus_nancymaae	KZ205162.1.tRNA57-iMetCAT	KZ205162.1	574352	574424	-	15	-26.1	60.4	0.677055556	8	0.028497409	0.494001411	-1.56505	2	0	active	0.963763426	True
Aotus_nancymaae	KZ205162.1.tRNA58-LysTTT	KZ205162.1	573356	573429	-	11	-26	86.8	0.320205479	11	0.025873221	0.874417055	-1.8795	2	0	active	0.965285654	True
Aotus_nancymaae	KZ205162.1.tRNA59-LeuCAA	KZ205162.1	402070	402176	-	5	-40.6	75.6	0.094142857	8	0.034739454	0.678294574	-0.4754	2	5	active	0.842662075	True
Aotus_nancymaae	KZ205162.1.tRNA6-SerCGA	KZ205162.1	117858	117940	+	3	-34	94	0.676378049	13	0.017902813	0.131901262	-1.82325	3	27	active	0.726058073	True
Aotus_nancymaae	KZ205162.1.tRNA60-SerAGA	KZ205162.1	391993	392075	-	9	-32.8	89.6	0.642280488	7	0.042199488	0.662010767	-1.32035	3	9	active	0.976013607	True
Aotus_nancymaae	KZ205162.1.tRNA62-SerAGA	KZ205162.1	383357	383439	-	9	-32.8	90.3	0.827280488	92	0.030690537	0.576131687	-3.2726	3	11	active	0.956550722	True
Aotus_nancymaae	KZ205162.1.tRNA65-iMetCAT	KZ205162.1	247382	247454	-	15	-26.1	60.4	0.174444444	4	0.029792746	0.736603529	-0.9546	0	24	active	0.951376044	True
Aotus_nancymaae	KZ205162.1.tRNA66-IleAAT	KZ205162.1	210714	210788	-	9	-25.5	81.2	0.288310811	4	0.04005168	0.614466292	-1.20495	3	25	active	0.979228676	True
Aotus_nancymaae	KZ205162.1.tRNA68-LeuTAA	KZ205162.1	127919	128002	-	2	-33.8	88.2	0.296061728	14	0.028097063	0.456323338	-1.775055556	2	34	active	0.930290305	True
Aotus_nancymaae	KZ205162.1.tRNA69-ValCAC	KZ205162.1	113177	113251	-	7	-10.1	53.2	0.53827027	25	0.034883721	0.343137255	-2.1297	2	24	active	0.516559335	True
Aotus_nancymaae	KZ205162.1.tRNA7-ArgACG	KZ205162.1	121778	121851	+	6	-23.1	64.2	0.687493151	8	0.033635188	0.901639344	-2.807157895	3	31	active	0.98707953	True
Aotus_nancymaae	KZ205162.1.tRNA70-IleAAT	KZ205162.1	101025	101099	-	9	-25.5	80.3	0.524635135	15	0.036175711	0.729166667	-1.90475	0	25	active	0.984131263	True
Aotus_nancymaae	KZ205162.1.tRNA73-AlaAGC	KZ205162.1	98	171	-	14	-26.3	60	-0.090438356	99	0.011516315	0.122100122	-1.38755	0	10	inactive	-0.83733261	True
Aotus_nancymaae	KZ205330.1.tRNA1-LeuCAA	KZ205330.1	1650035	1650141	+	5	-42.6	73.6	0.886380952	6	0.086848635	1.194176966	-1.59775	1	29	active	0.964087251	True
Aotus_nancymaae	KZ205330.1.tRNA2-GluCTC	KZ205330.1	1650433	1650505	+	6	-26.4	73.2	0.976805556	5	0.04015544	0.823045267	-4.0418	1	29	active	0.987168252	True
Aotus_nancymaae	KZ205585.1.tRNA1-AsnGTT	KZ205585.1	864328	864402	-	17	-23.9	61.4	?	50	0.0374677	0.310386875	?	0	18	active	0.821122107	True
Aotus_nancymaae	KZ205780.1.tRNA1-ProTGG	KZ205780.1	1472577	1472649	+	6	-29.5	70.3	0.111416667	0	0.046632124	0.555555556	-1.8908	6	44	active	0.980647099	True
Aotus_nancymaae	KZ205780.1.tRNA11-LysCTT	KZ205780.1	1481896	1481969	-	12	-28	87.8	0.315219178	4	0.019404916	0.215146299	-2.5118	4	41	active	0.801228588	True
Aotus_nancymaae	KZ205780.1.tRNA12-ProCGG	KZ205780.1	1477915	1477987	-	4	-29.5	70.2	0.200458333	12	0.042746114	0.505436629	-0.74725	5	44	active	0.959266058	True
Aotus_nancymaae	KZ205780.1.tRNA14-ProAGG	KZ205780.1	1469315	1469387	-	12	-29.5	70.2	0.513777778	35	0.053108808	0.664767331	-3.84715	5	44	active	0.983494539	True
Aotus_nancymaae	KZ205780.1.tRNA16-ProAGG	KZ205780.1	1467476	1467548	-	12	-29.5	70.2	0.513777778	35	0.046632124	0.654205607	-3.9483	4	41	active	0.983761818	True
Aotus_nancymaae	KZ205780.1.tRNA2-ProAGG	KZ205780.1	1473940	1474012	+	12	-29.5	70.2	0.552472222	3	0.045336788	0.551801802	-3.96255	6	44	active	0.987304033	True
Aotus_nancymaae	KZ205780.1.tRNA3-SupTCA	KZ205780.1	1475687	1475758	+	2	-29.1	72.7	0.202	4	0.027237354	0.39717564	-1.0342	6	44	active	0.866404372	True
Aotus_nancymaae	KZ205780.1.tRNA4-LysCTT	KZ205780.1	1493109	1493182	+	12	-28	87.8	0.522342466	4	0.054333765	0.842318059	-3.71065	4	45	active	0.987502896	True
Aotus_nancymaae	KZ205780.1.tRNA6-ArgCCG	KZ205780.1	1500240	1500313	-	4	-27.1	67	1.346369863	14	0.07373868	0.837191358	-4.9533	4	43	active	0.987775804	True
Aotus_nancymaae	KZ205780.1.tRNA7-ArgCCG	KZ205780.1	1498936	1499009	-	4	-27.1	67	1.346369863	14	0.076326003	0.846774194	-4.9533	4	42	active	0.985819136	True
Aotus_nancymaae	KZ205780.1.tRNA8-UndetNNN	KZ205780.1	1495528	1495600	-	2	-31.2	56.1	0.919458333	11	0.03238342	0.643382353	-2.76275	4	43	active	0.835605134	True
Aotus_nancymaae	KZ205780.1.tRNA9-ProTGG	KZ205780.1	1491972	1492044	-	6	-29.5	70.3	0.841458333	3	0.063471503	0.620689655	-5.20615	4	46	active	0.987571312	True
Aotus_nancymaae	KZ205785.1.tRNA1-AsnGTT	KZ205785.1	62031	62105	+	17	-22.1	57.7	0.103945946	11	0.042635659	0.676328502	-0.99655	1	5	active	0.871911258	True
Aotus_nancymaae	KZ205785.1.tRNA2-AsnGTT	KZ205785.1	66944	67024	+	17	-19.8	59.4	0	12	0.042307692	0.684261975	0	1	6	active	0.615878173	True
Aotus_nancymaae	KZ205785.1.tRNA3-GlnCTG	KZ205785.1	43341	43413	-	9	-24.2	71.1	-0.056638889	28	0.031088083	0.518518519	-0.7394	0	3	active	0.736044784	True
Aotus_nancymaae	KZ205987.1.tRNA1-LeuCAG	KZ205987.1	184562	184645	+	5	-32.8	77.3	1.02913253	7	0.043422733	0.861538462	-3.71275	4	29	active	0.987046186	True
Aotus_nancymaae	KZ205987.1.tRNA10-GlyTCC	KZ205987.1	183529	183601	-	5	-25.1	73.8	0.972888889	7	0.041450777	0.743395725	-3.23725	4	29	active	0.987138222	True
Aotus_nancymaae	KZ205987.1.tRNA11-AspGTC	KZ205987.1	182539	182611	-	8	-26.4	66.5	0.655847222	9	0.016839378	0.282828283	-2.0907	4	29	active	0.514958966	True
Aotus_nancymaae	KZ205987.1.tRNA12-AsnGTT	KZ205987.1	177027	177101	-	17	-26.4	81.5	1.205283784	8	0.04005168	0.541795666	-4.24675	3	30	active	0.988480399	True
Aotus_nancymaae	KZ205987.1.tRNA2-GlyGCC	KZ205987.1	190944	191015	+	8	-26.4	81	1.150225352	10	0.053177691	0.83541714	-2.8039	3	30	active	0.988380007	True
Aotus_nancymaae	KZ205987.1.tRNA3-AspGTC	KZ205987.1	225041	225113	+	8	-26.4	66.5	0.471569444	10	0.115284974	1.138638639	-0.3048	2	26	active	0.901089476	True
Aotus_nancymaae	KZ205987.1.tRNA4-GlyTCC	KZ205987.1	225752	225824	+	5	-25.1	73.8	0.300027778	10	0.101036269	0.952518819	-0.3384	2	26	active	0.943704014	True
Aotus_nancymaae	KZ205987.1.tRNA6-ValCAC	KZ205987.1	360202	360275	+	7	-24.7	79.4	1.136109589	9	0.08538163	0.795891163	-2.57005	0	17	active	0.986398741	True
Aotus_nancymaae	KZ205987.1.tRNA7-ArgTCT	KZ205987.1	2368323	2368397	+	5	-27.7	78.5	1.611905405	19	0.021963824	0.303217822	1.4991	0	16	active	0.814523846	True
Aotus_nancymaae	KZ205987.1.tRNA9-LeuCAG	KZ205987.1	224411	224494	-	5	-35.7	78.2	0.337204819	8	0.102171137	1.183190534	-0.028	2	25	active	0.884093919	True
Aotus_nancymaae	KZ206261.1.tRNA1-AsnGTT	KZ206261.1	949085	949159	+	17	-26.4	80.9	1.27377027	11	0.087855297	0.968615674	-1.9539	0	15	active	0.982560316	True
Aotus_nancymaae	KZ206423.1.tRNA11-SerGCT	KZ206423.1	332839	332921	+	8	-30.7	88.4	1.389512195	24	0.029411765	0.780379041	-4.51295	4	35	active	0.987748117	True
Aotus_nancymaae	KZ206423.1.tRNA12-iMetCAT	KZ206423.1	342617	342689	-	15	-26.1	60.4	1.127486111	14	0.018134715	0.418160096	-4.6266	1	38	active	0.886412506	True
Aotus_nancymaae	KZ206423.1.tRNA13-ArgTCG	KZ206423.1	315406	315479	-	4	-25.9	70.3	0.744438356	15	0.041397154	0.983146067	-3.18535	4	41	active	0.987164277	True
Aotus_nancymaae	KZ206423.1.tRNA14-SerAGA	KZ206423.1	310092	310174	-	9	-32.8	89.6	0.948463415	53	0.040920716	0.894813733	-2.5125	5	43	active	0.9586963	True
Aotus_nancymaae	KZ206423.1.tRNA15-ArgACG	KZ206423.1	309591	309664	-	6	-25.4	67.6	0.909164384	5	0.027166882	0.812693498	-3.78525	5	43	active	0.986204126	True
Aotus_nancymaae	KZ206423.1.tRNA16-LeuCAG	KZ206423.1	138608	138691	-	5	-35.7	78.2	1.348373494	8	0.037037037	0.777873812	-5.29715	2	50	active	0.983666408	True
Aotus_nancymaae	KZ206423.1.tRNA17-ArgACG	KZ206423.1	128624	128697	-	6	-25.4	67.6	1.277547945	15	0.063389392	0.875	-2.67145	3	45	active	0.98863582	True
Aotus_nancymaae	KZ206423.1.tRNA18-ValCAC	KZ206423.1	128062	128135	-	7	-24.7	79.4	1.282424658	4	0.071151358	0.917602996	-3.81595	2	45	active	0.988992985	True
Aotus_nancymaae	KZ206423.1.tRNA19-AlaCGC	KZ206423.1	112149	112221	-	4	-26.5	79.7	1.426597222	5	0.025906736	0.511695906	-3.7854	5	34	active	0.984685502	True
Aotus_nancymaae	KZ206423.1.tRNA2-AlaAGC	KZ206423.1	102497	102570	+	14	-29.6	58.9	1.068780822	1	0.040103493	0.823045267	-2.29095	7	31	active	0.96634012	True
Aotus_nancymaae	KZ206423.1.tRNA20-IleAAT	KZ206423.1	111518	111592	-	9	-25.5	81.2	1.329878378	6	0.031007752	0.70915454	-3.45365	5	34	active	0.987781582	True
Aotus_nancymaae	KZ206423.1.tRNA21-ProAGG	KZ206423.1	110637	110709	-	12	-29.5	70.2	1.413652778	3	0.031088083	0.652985075	-3.8103	5	34	active	0.987448861	True
Aotus_nancymaae	KZ206423.1.tRNA22-LysCTT	KZ206423.1	109339	109412	-	12	-28	87.8	0.979465753	5	0.014230272	0.224358974	-4.4791	5	32	active	0.641360509	True
Aotus_nancymaae	KZ206423.1.tRNA23-TyrGTA	KZ206423.1	104635	104724	-	11	-30.5	78	1.514575342	8	0.032953105	0.693221831	-3.51535	6	31	active	0.988283696	True
Aotus_nancymaae	KZ206423.1.tRNA25-TyrGTA	KZ206423.1	95521	95610	-	11	-18.2	57.9	0.651287671	6	0.030418251	0.36505867	-2.30135	3	27	active	0.681348273	True
Aotus_nancymaae	KZ206423.1.tRNA26-TyrGTA	KZ206423.1	92762	92851	-	11	-29.3	74.9	0.810054795	6	0.022813688	0.291991101	-2.18505	2	27	active	0.934768078	True
Aotus_nancymaae	KZ206423.1.tRNA27-AlaAGC	KZ206423.1	6221	6294	-	14	-26.3	60	-0.090438356	203	0.009055627	0.05976776	-1.6852	0	5	inactive	-0.858265554	True
Aotus_nancymaae	KZ206423.1.tRNA3-ThrAGT	KZ206423.1	133119	133193	+	8	-25.3	78.6	1.547148649	7	0.033591731	0.772727273	-3.66565	3	46	active	0.988812903	True
Aotus_nancymaae	KZ206423.1.tRNA4-TrpCCA	KZ206423.1	303772	303844	+	7	-24.5	73.4	1.269680556	4	0.029792746	0.554298643	-2.87925	3	46	active	0.987609323	True
Aotus_nancymaae	KZ206423.1.tRNA5-iMetCAT	KZ206423.1	304906	304978	+	15	-26.1	60.4	0.378319444	6	0.015544041	0.307287094	-2.3153	3	46	inactive	-0.620767399	True
Aotus_nancymaae	KZ206423.1.tRNA6-TrpCCA	KZ206423.1	319123	319195	+	7	-24.5	69	0.809777778	12	0.031088083	0.864838152	-2.7946	6	37	active	0.986635628	True
Aotus_nancymaae	KZ206423.1.tRNA7-iMetCAT	KZ206423.1	325056	325128	+	15	-26.1	60.4	1.066305556	13	0.034974093	0.845070423	-2.7968	5	37	active	0.98791586	True
Aotus_nancymaae	KZ206423.1.tRNA8-SerTGA	KZ206423.1	325604	325686	+	4	-32.8	90.4	1.360585366	8	0.023017903	0.462962963	-3.4346	4	37	active	0.98025466	True
Aotus_nancymaae	KZ206423.1.tRNA9-GlnTTG	KZ206423.1	326468	326540	+	4	-22.2	69	0.730736111	7	0.015544041	0.498102467	-2.3631	4	38	active	0.712252138	True
Aotus_nancymaae	KZ206493.1.tRNA1-LysCTT	KZ206493.1	627477	627550	+	12	-18.3	65.9	0	7	0.034928849	0.324434557	0.0615	0	36	inactive	-0.572328678	True
Aotus_nancymaae	KZ206671.1.tRNA1-PheGAA	KZ206671.1	4372876	4372949	+	10	-21.9	88.9	1.067863014	5	0.076326003	0.777777778	-2.6072	0	22	active	0.985902045	True
Aotus_nancymaae	KZ206857.1.tRNA1-ThrCGT	KZ206857.1	417676	417748	-	5	-27	79.6	1.483972222	22	0.095854922	0.953895072	0.1328	0	17	active	0.964709473	True
Aotus_nancymaae	KZ206898.1.tRNA1-MetCAT	KZ206898.1	4543	4616	-	15	-26.7	82.7	0.43260274	2	0.040103493	0.602503912	-3.2104	0	0	active	0.957951002	True
Aotus_nancymaae	KZ206965.1.tRNA3-ProAGG	KZ206965.1	26614081	26614153	+	12	-29.5	70.2	1.497555556	2	0.044041451	0.788288288	-4.26415	1	13	active	0.987541897	True
Aotus_nancymaae	KZ206965.1.tRNA4-ProCGG	KZ206965.1	26614811	26614883	-	4	-29.5	70.2	1.188986111	4	0.081606218	1.064814815	-0.87135	1	13	active	0.950683549	True
Aotus_nancymaae	KZ207065.1.tRNA1-PheGAA	KZ207065.1	244166	244239	+	10	-10	67.4	-0.058767123	4	0.023285899	0.255567725	0.10795	0	47	inactive	-0.701552764	True
Aotus_nancymaae	KZ207330.1.tRNA1-LysCTT	KZ207330.1	12196505	12196582	-	12	-18.3	60.4	-1.087	189	0.011583012	0.13478819	-0.25625	0	37	inactive	-0.937587574	True
Aotus_nancymaae	KZ207363.1.tRNA1-SeCTCA	KZ207363.1	2820472	2820559	+	2	-37.5	147.4	1.448183908	29	0.044472681	0.854700855	-4.82785	0	51	active	0.94103415	True
Aotus_nancymaae	KZ207725.1.tRNA1-SerGCT	KZ207725.1	1056102	1056184	-	8	-30.7	88.4	1.569146341	10	0.043478261	0.828402367	-1.1602	0	32	active	0.983203031	True
Aotus_nancymaae	KZ208598.1.tRNA1-GluTTC	KZ208598.1	1224179	1224251	+	10	-24.8	70.4	1.543222222	13	0.085492228	0.951646091	-1.75925	0	25	active	0.982720218	True
Bos_taurus	tRNA-Ala-AGC-1-1	chr23	30049199	30049271	-	29	-29.9	80.3	0.749833333	4	0.034974093	0.68627451	-1.9322	5	12	active	0.900080563	True
Bos_taurus	tRNA-Ala-AGC-10-1	chr7	60871677	60871749	+	29	-20.6	66.7	0.006194444	351	0.006476684	0.102040816	-0.1933	0	25	inactive	-0.968853626	True
Bos_taurus	tRNA-Ala-AGC-11-1	chr23	31296523	31296596	+	29	-27.7	54.6	1.052136986	156	0.025873221	0.609543713	-2.76495	3	34	active	0.634088391	True
Bos_taurus	tRNA-Ala-AGC-12-1	chr18	23631559	23631632	+	29	-25.8	52.3	0.122616438	8	0.009055627	0.050857309	-0.3847	0	10	inactive	-0.936574455	True
Bos_taurus	tRNA-Ala-AGC-12-2	chr29	46581852	46581925	-	29	-25.8	52.3	0.768794521	8	0.041397154	0.709219858	-2.14545	0	11	active	0.722529161	True
Bos_taurus	tRNA-Ala-AGC-13-1	chr23	31191482	31191555	+	29	-28.6	55.8	0.301863014	1	0.029754204	0.382872324	-1.61755	6	9	active	0.626189869	True
Bos_taurus	tRNA-Ala-AGC-14-1	chr18	51973770	51973843	-	29	-21	62.5	-0.094260274	115	0.016817594	0.568181818	-0.1061	0	48	inactive	-0.512556171	True
Bos_taurus	tRNA-Ala-AGC-15-1	chr18	29339448	29339519	+	29	-24.4	57.2	0.033267606	279	0.010376135	0.094060736	-0.17945	0	1	inactive	-0.959985368	True
Bos_taurus	tRNA-Ala-AGC-16-1	chr3	86506666	86506737	-	29	-21.8	61.3	-0.148242424	275	0.002594034	0.057189542	-0.1121875	0	29	inactive	-0.938749384	True
Bos_taurus	tRNA-Ala-AGC-17-1	chr21	68579157	68579229	+	29	-21.8	53.3	-0.207625	151	0.018134715	0.282258065	-0.0585	0	100	inactive	-0.84676734	True
Bos_taurus	tRNA-Ala-AGC-2-1	chr23	29976891	29976963	+	29	-30.4	84.2	0.405277778	64	0.045336788	0.518867925	-0.9157	4	14	active	0.878455222	True
Bos_taurus	tRNA-Ala-AGC-3-1	chr1	95174245	95174317	+	29	-31.9	84.7	0.094361111	57	0.024611399	0.422705314	-0.29825	3	18	active	0.692292365	True
Bos_taurus	tRNA-Ala-AGC-3-2	chr23	29937385	29937457	+	29	-31.9	84.7	1.068222222	1	0.041450777	0.797720798	-3.1318	2	16	active	0.923612913	True
Bos_taurus	tRNA-Ala-AGC-3-3	chr23	29945278	29945350	+	29	-31.9	84.7	0.93625	1	0.023316062	0.468331847	-4.60565	2	14	active	0.893110299	True
Bos_taurus	tRNA-Ala-AGC-3-4	chr23	30004044	30004116	-	29	-31.9	84.7	0.124444444	79	0.022020725	0.220541903	-0.3701	4	1	active	0.579114027	True
Bos_taurus	tRNA-Ala-AGC-3-5	chr23	30011518	30011590	-	29	-31.9	84.7	0.192944444	44	0.016839378	0.406976744	0.0435	7	2	active	0.559878376	True
Bos_taurus	tRNA-Ala-AGC-3-6	chr23	30012419	30012491	+	29	-31.9	84.7	0.045152778	123	0.019430052	0.321469575	-0.77665	7	3	active	0.534159954	True
Bos_taurus	tRNA-Ala-AGC-3-7	chr23	30017823	30017895	+	29	-31.9	84.7	0.235055556	119	0.027202073	0.449293967	-1.1175	6	5	active	0.800450504	True
Bos_taurus	tRNA-Ala-AGC-3-8	chr23	30791063	30791135	+	29	-31.9	84.7	0.124472222	8	0.033678756	0.480769231	-0.5705	4	30	active	0.821158659	True
Bos_taurus	tRNA-Ala-AGC-4-1	chr18	54151835	54151907	-	29	-27.5	83	0.123861111	12	0.015544041	0.364583333	-0.58225	0	37	inactive	-0.676468591	True
Bos_taurus	tRNA-Ala-AGC-4-2	chr19	56483666	56483738	-	29	-27.5	83	-0.139138889	8	0.006476684	0	-0.97765	0	105	inactive	-0.753843293	True
Bos_taurus	tRNA-Ala-AGC-5-1	chr23	30033616	30033688	+	29	-23.6	76.1	0.875902778	3	0.023316062	0.452898551	-4.02125	3	6	active	0.874329504	True
Bos_taurus	tRNA-Ala-AGC-6-1	chr26	26720451	26720523	-	29	-16.1	64.3	-0.038527778	351	0.012953368	0.472334683	-0.059	0	0	inactive	-0.781071814	True
Bos_taurus	tRNA-Ala-AGC-7-1	chr7	48654603	48654675	+	29	-27.4	80.2	-0.021180556	351	0.007772021	0.057320668	-0.12105	0	5	inactive	-0.813472882	True
Bos_taurus	tRNA-Ala-AGC-8-1	chr23	31175614	31175687	+	29	-26.2	55.2	0.458780822	1	0.010349288	0.129749768	-1.385157895	5	11	inactive	-0.82079736	True
Bos_taurus	tRNA-Ala-AGC-8-2	chr23	31187063	31187136	+	29	-26.2	55.2	0.458726027	1	0.006468305	0	-1.3469	6	12	inactive	-0.860145222	True
Bos_taurus	tRNA-Ala-AGC-8-3	chr23	31198780	31198853	-	29	-26.2	55.2	0.123767123	1	0.006468305	0	-0.05935	4	9	inactive	-0.870419256	True
Bos_taurus	tRNA-Ala-AGC-9-1	chr11	72573764	72573837	-	29	-32	59.7	1.609493151	5	0.054333765	0.786264442	-2.58385	1	82	active	0.942861286	True
Bos_taurus	tRNA-Ala-AGC-9-2	chr14	32154327	32154400	+	29	-32	59.7	1.616712329	1	0.053040103	0.977777778	-1.25535	2	19	active	0.928574913	True
Bos_taurus	tRNA-Ala-CGC-1-1	chr6	38552142	38552214	-	9	-26.5	79.7	0.096305556	69	0.014248705	0.184210526	-0.2386	0	24	inactive	-0.775862725	True
Bos_taurus	tRNA-Ala-CGC-1-2	chr23	30027675	30027747	+	9	-26.5	79.7	1.125208333	11	0.019430052	0.505597689	-2.86355	4	6	active	0.95900385	True
Bos_taurus	tRNA-Ala-CGC-1-3	chr23	31313434	31313506	-	9	-26.5	79.7	1.40525	5	0.029792746	0.580431177	-3.8717	4	47	active	0.987761023	True
Bos_taurus	tRNA-Ala-CGC-2-1	chr23	29949903	29949975	+	9	-29.9	80.3	-0.057180556	18	0.018134715	0.42997543	-1.11315	2	14	active	0.709489491	True
Bos_taurus	tRNA-Ala-CGC-3-1	chr2	39950590	39950662	-	9	-27.6	74.4	1.605972222	15	0.059585492	0.834160874	-2.36695	1	15	active	0.985830136	True
Bos_taurus	tRNA-Ala-CGC-4-1	chr23	30019749	30019821	+	9	-23.8	72.8	0.041388889	6	0.007772021	0	-0.8472	6	5	inactive	-0.773287624	True
Bos_taurus	tRNA-Ala-CGC-5-1	chr23	29983376	29983448	-	9	-25.7	75.1	0.267527778	9	0.027202073	0.500984076	-5.19925	4	13	active	0.98075092	True
Bos_taurus	tRNA-Ala-CGC-6-1	chr24	4954491	4954563	+	9	-24.5	77.9	-0.217724638	27	0.009067358	0.355691057	-1.703	0	0	inactive	-0.651158084	True
Bos_taurus	tRNA-Ala-CGC-7-1	chr4	103838543	103838616	-	9	-12.1	58.3	0.001205479	314	0.010349288	0.194444444	0.09305	0	21	inactive	-0.954125586	True
Bos_taurus	tRNA-Ala-TGC-1-1	chr23	30046778	30046850	+	18	-26.5	79.7	0.454194444	58	0.019430052	0.737704918	-2.02445	4	10	active	0.919696468	True
Bos_taurus	tRNA-Ala-TGC-10-1	chr23	39054566	39054638	-	18	-24.3	64.4	-0.021680556	10	0.009067358	0.221706081	-0.06235	0	7	inactive	-0.914340166	True
Bos_taurus	tRNA-Ala-TGC-11-1	chrX	29584847	29584919	-	18	-15.9	54.8	0.183069444	58	0.00388601	0.268199234	-0.377625	0	0	inactive	-0.857611897	True
Bos_taurus	tRNA-Ala-TGC-12-1	chr23	17653317	17653390	+	18	-25.8	71.4	-0.051561644	36	0.006468305	0.195603577	-0.1161	0	50	inactive	-0.925125842	True
Bos_taurus	tRNA-Ala-TGC-13-1	chr26	11257613	11257686	+	18	-18.4	54.1	-0.096452055	213	0.009055627	0	-0.2026	0	13	inactive	-0.954160748	True
Bos_taurus	tRNA-Ala-TGC-14-1	chr2	23006990	23007062	+	18	-17.7	54.6	0.051347222	84	0.002590674	0	-0.06345	0	3	inactive	-0.9176347	True
Bos_taurus	tRNA-Ala-TGC-15-1	chr6	47008905	47008980	+	18	-19.1	60.1	0.102706667	210	0.006451613	0	-0.32005	0	5	inactive	-0.924781687	True
Bos_taurus	tRNA-Ala-TGC-2-1	chr7	41735750	41735822	+	18	-26.5	79.7	1.356833333	19	0.045336788	0.780532599	-4.10225	2	38	active	0.988841405	True
Bos_taurus	tRNA-Ala-TGC-2-2	chr17	53134697	53134769	+	18	-26.5	79.7	1.338986111	33	0.016839378	0.320659643	-3.00245	4	35	active	0.581777154	True
Bos_taurus	tRNA-Ala-TGC-2-3	chr23	29987616	29987688	-	18	-26.5	79.7	0.344041667	2	0.010362694	0.238636364	-1.0192	3	11	inactive	-0.729834905	True
Bos_taurus	tRNA-Ala-TGC-3-1	chr3	107627902	107627974	-	18	-26.5	78.7	0.123972222	2	0.006476684	0	-0.3422	0	24	inactive	-0.825707547	True
Bos_taurus	tRNA-Ala-TGC-3-2	chr17	53127888	53127960	-	18	-26.5	78.7	0.755736111	2	0.046632124	0.946643718	-3.14695	4	35	active	0.987609921	True
Bos_taurus	tRNA-Ala-TGC-4-1	chr23	29966806	29966878	+	18	-28.5	79.5	0.204708333	13	0.022020725	0.425347222	-2.51315	4	14	active	0.960698661	True
Bos_taurus	tRNA-Ala-TGC-5-1	chr6	110935375	110935447	-	18	-24.9	77	0.077763889	54	0.007772021	0.140336808	-0.46375	0	0	inactive	-0.89815266	True
Bos_taurus	tRNA-Ala-TGC-6-1	chr5	68229674	68229746	-	18	-25.5	77.3	0.259152778	52	0.005181347	0.25728988	-0.3329	0	19	inactive	-0.81344887	True
Bos_taurus	tRNA-Ala-TGC-7-1	chr6	93461518	93461590	+	18	-26.4	77.4	0.056916667	2	0.020725389	0.416480738	-0.17785	0	7	active	0.635378729	True
Bos_taurus	tRNA-Ala-TGC-8-1	chr23	30042697	30042769	-	18	-24.3	81.8	0.057347222	29	0.024611399	0.694444444	-0.2784	5	9	active	0.724156294	True
Bos_taurus	tRNA-Ala-TGC-9-1	chr9	17473020	17473092	+	18	-27.5	77.4	-0.269277778	7	0.007772021	0.189873418	-0.676	0	0	inactive	-0.80502257	True
Bos_taurus	tRNA-Arg-ACG-1-1	chr10	21752357	21752430	-	9	-25.4	67.6	1.609013699	14	0.043984476	0.913937548	-3.3412	0	97	active	0.988194231	True
Bos_taurus	tRNA-Arg-ACG-1-2	chr23	31168993	31169066	+	9	-25.4	67.6	0.299506849	42	0.032341527	0.616438356	-1.38585	4	10	active	0.951543449	True
Bos_taurus	tRNA-Arg-ACG-1-3	chr23	31331615	31331688	-	9	-25.4	67.6	1.25969863	16	0.045278137	0.725609756	-2.7453	3	50	active	0.988736212	True
Bos_taurus	tRNA-Arg-ACG-1-4	chr23	31438377	31438450	-	9	-25.4	67.6	0.89330137	3	0.025873221	0.823529412	-3.92705	8	46	active	0.935992803	True
Bos_taurus	tRNA-Arg-ACG-2-1	chr22	54252475	54252548	+	9	-23.1	64.2	1.489260274	8	0.076326003	1.055170335	-3.30855	0	37	active	0.981977624	True
Bos_taurus	tRNA-Arg-ACG-2-2	chr23	30819035	30819108	+	9	-23.1	64.2	0.724027397	10	0.02457956	0.523429711	-3.278578947	6	20	active	0.972682059	True
Bos_taurus	tRNA-Arg-ACG-2-3	chr23	30906149	30906222	+	9	-23.1	64.2	0.299273973	5	0.038809832	0.665821179	-0.02075	10	10	active	0.815900513	False
Bos_taurus	tRNA-Arg-ACG-2-4	chr23	30907149	30907222	+	9	-23.1	64.2	0.299273973	5	0.038809832	0.665821179	-0.02075	10	10	active	0.815900513	False
Bos_taurus	tRNA-Arg-ACG-2-5	chr23	31086207	31086280	-	9	-23.1	64.2	0.682041096	11	0.025873221	0.705645161	-2.93955	3	19	active	0.986055076	True
Bos_taurus	tRNA-Arg-CCG-1-1	chr23	29932825	29932898	-	10	-27.1	67	0.413013699	2	0.029754204	0.412411626	-1.08885	2	18	active	0.936321057	True
Bos_taurus	tRNA-Arg-CCG-1-2	chr23	29971501	29971574	+	10	-27.1	67	0.517945205	32	0.027166882	0.354161396	-1.5409	4	14	active	0.911795564	True
Bos_taurus	tRNA-Arg-CCG-1-3	chr23	29971885	29971958	+	10	-27.1	67	0.517945205	32	0.027166882	1.080246914	-1.5409	4	14	active	0.974635841	True
Bos_taurus	tRNA-Arg-CCG-1-4	chr25	2584568	2584641	+	10	-27.1	67	1.333739726	13	0.067270375	0.810536981	-5.28385	3	47	active	0.988343501	True
Bos_taurus	tRNA-Arg-CCG-2-1	chr19	49585335	49585408	+	10	-29	64.9	1.63639726	12	0.04915912	0.90956341	0.27885	0	36	active	0.957865028	True
Bos_taurus	tRNA-Arg-CCG-3-1	chr16	44063104	44063177	-	10	-25.9	67.1	0.008780822	271	0.01164295	0.180041152	-0.08355	0	57	inactive	-0.921572913	True
Bos_taurus	tRNA-Arg-CCG-4-1	chr7	21000388	21000461	-	10	-19.7	62	-0.046150685	93	0.016817594	0.320094068	0.0212	0	96	inactive	-0.831649577	True
Bos_taurus	tRNA-Arg-CCG-5-1	chr10	8214714	8214787	-	10	-22.5	54.3	0.036287671	82	0.010349288	0.131752306	0.10575	0	14	inactive	-0.912306721	True
Bos_taurus	tRNA-Arg-CCG-6-1	chr8	100369864	100369937	+	10	-20.1	58.8	-0.061972603	351	0.016817594	0.157232704	-0.09525	0	39	inactive	-0.939953918	True
Bos_taurus	tRNA-Arg-CCG-7-1	chr10	15110647	15110720	-	10	-14.8	53.1	0.058164384	351	0.03622251	0.470565639	-0.4053	0	34	inactive	-0.686354453	True
Bos_taurus	tRNA-Arg-CCT-1-1	chr19	57033964	57034037	-	36	-32.1	72.3	1.266178082	7	0.071151358	0.990566038	-3.1754	3	71	active	0.927606303	True
Bos_taurus	tRNA-Arg-CCT-1-2	chr25	2633689	2633762	+	36	-32.1	72.3	0.784013699	41	0.040103493	0.834445928	-2.0895	8	45	active	0.846404003	True
Bos_taurus	tRNA-Arg-CCT-10-1	chr26	22733762	22733835	+	36	-17.4	60.4	-0.170521127	168	0.003880983	0.075839653	-0.345833333	0	47	inactive	-0.93939572	True
Bos_taurus	tRNA-Arg-CCT-11-1	chr12	11203569	11203641	-	36	-17.4	61.8	0.045666667	126	0.012953368	0.317460317	-0.5319	0	26	inactive	-0.945849593	True
Bos_taurus	tRNA-Arg-CCT-12-1	chr7	6463047	6463120	-	36	-25.4	68.6	?	53	0.002587322	0	-0.8956	0	53	inactive	-0.926118502	True
Bos_taurus	tRNA-Arg-CCT-13-1	chr28	8457047	8457120	-	36	-22.3	61.2	0.008589041	86	0.014230272	0.364800476	-0.3166	0	48	inactive	-0.865967128	True
Bos_taurus	tRNA-Arg-CCT-14-1	chr15	63633462	63633535	+	36	-15.8	60.2	0.079726027	99	0.003880983	0.053639847	0.1341	0	11	inactive	-0.951340467	True
Bos_taurus	tRNA-Arg-CCT-15-1	chr12	53100148	53100221	-	36	-14.4	66.2	-0.044191781	93	0.005174644	0.151909722	0.12275	0	34	inactive	-0.954851094	True
Bos_taurus	tRNA-Arg-CCT-16-1	chr15	20399873	20399946	+	36	-23.8	64.5	-0.122136986	70	0.003880983	0.080515298	-0.05445	0	4	inactive	-0.912734667	True
Bos_taurus	tRNA-Arg-CCT-17-1	chr23	14536133	14536206	-	36	-21.8	56.3	0.014178082	351	0.010349288	0.266768293	-0.43595	0	1	inactive	-0.943442171	True
Bos_taurus	tRNA-Arg-CCT-18-1	chr3	106643857	106643930	-	36	-14.3	62.4	0.008493151	49	0.005174644	0.152505447	0.16055	0	24	inactive	-0.963469143	True
Bos_taurus	tRNA-Arg-CCT-19-1	chr19	19570852	19570925	-	36	-16.9	63.9	0.032712329	351	0.031047865	0.406976744	0.07845	0	25	inactive	-0.714695408	True
Bos_taurus	tRNA-Arg-CCT-2-1	chr25	2586870	2586943	+	36	-30.6	71.7	0.914150685	32	0.038809832	0.800304878	-2.7431	3	47	active	0.91444429	True
Bos_taurus	tRNA-Arg-CCT-20-1	chr13	77451427	77451500	+	36	-19.6	57.5	0.005849315	75	0.014230272	0.297113752	-0.11315	0	9	inactive	-0.951646141	True
Bos_taurus	tRNA-Arg-CCT-21-1	chr9	65291101	65291174	-	36	-14.4	51.6	0.052150685	53	0.005174644	0.108560794	0.1071	0	2	inactive	-0.922842167	True
Bos_taurus	tRNA-Arg-CCT-22-1	chr17	17169898	17169971	+	36	-18	56	0.053369863	109	0.006468305	0.302768166	0.1233	0	6	inactive	-0.948832655	True
Bos_taurus	tRNA-Arg-CCT-23-1	chr1	118331058	118331131	+	36	-22	62.2	-0.016287671	106	0.009055627	0.239071038	0.05105	0	14	inactive	-0.952034615	True
Bos_taurus	tRNA-Arg-CCT-24-1	chr2	60255895	60255968	-	36	-13.3	59.5	0.057931507	266	0.002587322	0	-0.13315	0	5	inactive	-0.956178241	True
Bos_taurus	tRNA-Arg-CCT-25-1	chr12	16293538	16293611	-	36	-14	58.4	-0.146808219	65	0.014230272	0.409896062	0.0709	0	25	inactive	-0.83861548	True
Bos_taurus	tRNA-Arg-CCT-26-1	chr7	39893645	39893718	-	36	-16.7	60.5	0.098520548	136	0.002587322	0	-0.16635	0	34	inactive	-0.93971711	True
Bos_taurus	tRNA-Arg-CCT-27-1	chr17	56134269	56134342	+	36	-24.1	60.5	-0.062808219	154	0.009055627	0.348466746	-0.10115	0	50	inactive	-0.891995484	True
Bos_taurus	tRNA-Arg-CCT-28-1	chr14	32943613	32943686	-	36	-18.3	52.8	0.057945205	320	0.002587322	0	-0.06265	0	7	inactive	-0.958159194	True
Bos_taurus	tRNA-Arg-CCT-29-1	chr3	119209682	119209755	-	36	-21.6	54.8	-0.044739726	351	0.015523933	0.15597148	-0.3194	0	5	inactive	-0.964150872	True
Bos_taurus	tRNA-Arg-CCT-3-1	chr19	57032531	57032604	-	36	-30.2	67.5	1.022753425	60	0.067270375	0.993589744	-0.38895	3	73	active	0.862894764	True
Bos_taurus	tRNA-Arg-CCT-30-1	chr10	78471976	78472049	+	36	-19.4	59.2	0.049821918	351	0.003880983	0	-0.04485	0	0	inactive	-0.965998479	True
Bos_taurus	tRNA-Arg-CCT-31-1	chr14	35773071	35773145	+	36	-13.6	54.1	-0.293459459	73	0.010335917	0.175967823	-0.4609	0	1	inactive	-0.918130025	False
Bos_taurus	tRNA-Arg-CCT-31-2	chr14	35814733	35814807	+	36	-13.6	54.1	-0.293459459	73	0.010335917	0.175967823	-0.4609	1	0	inactive	-0.917135642	False
Bos_taurus	tRNA-Arg-CCT-32-1	chr5	93829240	93829313	+	36	-18.1	54.3	0.056219178	51	0.002587322	0.131975867	0.04255	0	3	inactive	-0.943267419	True
Bos_taurus	tRNA-Arg-CCT-33-1	chr21	15354373	15354446	+	36	-23.3	51.8	0.080205479	351	0.015523933	0.266819135	-0.0669	0	1	inactive	-0.893554048	True
Bos_taurus	tRNA-Arg-CCT-34-1	chr13	72667772	72667845	+	36	-16.5	52.7	0.02139726	95	0.007761966	0.181936322	0.04225	0	0	inactive	-0.949785301	True
Bos_taurus	tRNA-Arg-CCT-4-1	chr4	103714739	103714812	+	36	-27.2	65.6	1.635150685	6	0.056921087	1.329656863	-1.3542	0	30	active	0.916114519	True
Bos_taurus	tRNA-Arg-CCT-5-1	chr19	57033477	57033551	+	36	-32.6	64.2	0.793581081	35	0.096899225	1.207843137	-3.004	3	72	active	0.903688566	True
Bos_taurus	tRNA-Arg-CCT-6-1	chr25	2612168	2612241	-	36	-33.6	73.6	0.390972603	10	0.027166882	0.472207232	-0.7721	12	44	active	0.79166391	True
Bos_taurus	tRNA-Arg-CCT-7-1	chr5	73645956	73646029	-	36	-25	60.1	0.014150685	33	0.007761966	0.125	-0.0384	0	1	inactive	-0.947961489	True
Bos_taurus	tRNA-Arg-CCT-8-1	chr13	75985781	75985854	+	36	-25.2	67	-0.02090411	351	0.015523933	0.192138779	-0.38425	0	27	inactive	-0.968377776	True
Bos_taurus	tRNA-Arg-CCT-9-1	chr25	18985180	18985253	+	36	-11	66.8	0	162	0.005174644	0.113049096	0	0	17	inactive	-0.966708374	True
Bos_taurus	tRNA-Arg-TCG-1-1	chr21	21215852	21215925	+	9	-29.2	74.8	1.552972603	16	0.054333765	0.71697804	-3.21675	0	72	active	0.988385815	True
Bos_taurus	tRNA-Arg-TCG-2-1	chr25	26877427	26877500	+	9	-24	71.1	0.057589041	14	0.015523933	0.214285714	-0.23135	2	60	inactive	-0.865081959	True
Bos_taurus	tRNA-Arg-TCG-3-1	chr25	26872201	26872274	+	9	-23.2	70.4	0.123465753	14	0.016817594	0.162337662	-0.11035	2	67	inactive	-0.756128322	True
Bos_taurus	tRNA-Arg-TCG-4-1	chr1	95118150	95118223	+	9	-23.7	65.5	1.051931507	8	0.029754204	0.291747708	-2.6725	2	14	active	0.8998762	True
Bos_taurus	tRNA-Arg-TCG-4-2	chr23	31441479	31441552	-	9	-23.7	65.5	0.73369863	38	0.032341527	0.664893617	-3.07255	11	43	active	0.933863072	True
Bos_taurus	tRNA-Arg-TCG-5-1	chr19	57033078	57033151	+	9	-25.9	66.4	0.008452055	6	0.10996119	0.987743912	-1.6955	3	72	active	0.929864783	True
Bos_taurus	tRNA-Arg-TCG-6-1	chr20	7388078	7388151	-	9	-23.3	64.5	0.213054795	6	0.01164295	0.038080731	-0.7473	0	1	inactive	-0.840235754	True
Bos_taurus	tRNA-Arg-TCG-7-1	chr25	26871492	26871565	+	9	-21.7	60.6	0.065561644	16	0.018111255	0.187115744	-0.49065	2	69	inactive	-0.69311467	True
Bos_taurus	tRNA-Arg-TCG-8-1	chr23	31454510	31454583	-	9	-23.7	64.3	1.108917808	1	0.025873221	0.600686499	-5.4912	7	40	active	0.986509918	True
Bos_taurus	tRNA-Arg-TCT-1-1	chr23	30875297	30875385	-	11	-28.9	70.7	0.330876712	6	0.025380711	0.627240143	-2.7793	3	3	active	0.972842094	True
Bos_taurus	tRNA-Arg-TCT-10-1	chr12	20693025	20693098	+	11	-25.5	55.7	0.008342466	184	0.010349288	0.206855792	-0.22385	0	7	inactive	-0.928659518	True
Bos_taurus	tRNA-Arg-TCT-2-1	chr11	98957688	98957779	-	11	-27.9	70.1	0.263726027	2	0.069532238	0.981449525	-2.40395	0	86	active	0.981585973	True
Bos_taurus	tRNA-Arg-TCT-2-2	chr15	84095759	84095845	+	11	-28.4	70.3	1.177753425	6	0.066157761	0.913043478	-2.6272	5	30	active	0.988020786	True
Bos_taurus	tRNA-Arg-TCT-3-1	chr3	49796402	49796487	-	11	-30.7	71.1	1.577890411	4	0.078980892	0.971451229	0.73965	0	19	active	0.956528023	True
Bos_taurus	tRNA-Arg-TCT-4-1	chr19	28374365	28374452	+	11	-25.6	70.8	1.488931507	1	0.053367217	0.896636222	-0.3449	4	103	active	0.955930553	True
Bos_taurus	tRNA-Arg-TCT-5-1	chr3	10711896	10711970	+	11	-27.7	78.5	1.588297297	19	0.023255814	0.274725275	1.4798	0	19	active	0.80138194	True
Bos_taurus	tRNA-Arg-TCT-6-1	chr16	442113	442186	+	11	-30.6	70.9	-0.126246575	351	0.005174644	0.102011075	-0.87725	0	11	inactive	-0.788310351	True
Bos_taurus	tRNA-Arg-TCT-7-1	chr1	85737929	85738002	+	11	-20.5	62.8	0.00209589	99	0.005174644	0.190943808	-0.26575	0	2	inactive	-0.912735623	True
Bos_taurus	tRNA-Arg-TCT-8-1	chr5	112940693	112940766	-	11	-24.2	53.4	0.013972603	351	0.027166882	0.469618555	-0.20995	0	72	inactive	-0.633088701	True
Bos_taurus	tRNA-Arg-TCT-9-1	chr2	26828983	26829055	-	11	-15.7	57.6	0.012944444	265	0.011658031	0.364583333	0.10995	0	33	inactive	-0.903454523	True
Bos_taurus	tRNA-Asn-GTT-1-1	chr3	20918280	20918354	-	28	-26.4	80.9	0.439067568	9	0.049095607	0.772495756	-1.63365	2	29	active	0.916381658	True
Bos_taurus	tRNA-Asn-GTT-1-10	chr3	21326887	21326961	+	28	-26.4	80.9	0.124	33	0.072351421	1.046728972	-0.77095	5	0	active	0.852421377	True
Bos_taurus	tRNA-Asn-GTT-1-11	chr3	21402997	21403071	-	28	-26.4	80.9	0.023162162	5	0.045219638	0.799847648	-1.07625	3	4	active	0.880227045	True
Bos_taurus	tRNA-Asn-GTT-1-12	chr3	21445613	21445687	-	28	-26.4	80.9	-0.016486486	11	0.072351421	0.550416281	-0.16415	5	25	active	0.776015626	True
Bos_taurus	tRNA-Asn-GTT-1-13	chr7	45426983	45427057	+	28	-26.4	80.9	0.941418919	10	0.096899225	0.98536036	-2.11435	1	77	active	0.929169346	True
Bos_taurus	tRNA-Asn-GTT-1-14	chr12	30199503	30199577	+	28	-26.4	80.9	1.250459459	6	0.099483204	0.942028986	-2.01175	0	15	active	0.912613582	True
Bos_taurus	tRNA-Asn-GTT-1-15	chr19	39979527	39979601	-	28	-26.4	80.9	1.587486486	5	0.046511628	0.640830027	-1.922	0	59	active	0.951131226	True
Bos_taurus	tRNA-Asn-GTT-1-2	chr3	20951392	20951466	+	28	-26.4	80.9	0.455648649	15	0.065891473	0.852272727	-1.9429	3	20	active	0.91320368	True
Bos_taurus	tRNA-Asn-GTT-1-3	chr3	21003851	21003925	+	28	-26.4	80.9	0.123986486	12	0.073643411	0.782845473	-0.3264	3	10	active	0.824978446	True
Bos_taurus	tRNA-Asn-GTT-1-4	chr3	21028853	21028927	+	28	-26.4	80.9	0.123986486	12	0.071059432	0.605977766	-0.3264	4	10	active	0.822978446	False
Bos_taurus	tRNA-Asn-GTT-1-5	chr3	21094077	21094151	+	28	-26.4	80.9	0.102283784	33	0.071059432	1.055521188	-0.58105	2	3	active	0.791888377	True
Bos_taurus	tRNA-Asn-GTT-1-6	chr3	21176821	21176895	+	28	-26.4	80.9	-0.022581081	11	0.07751938	0.660938533	-0.4293	4	8	active	0.750327646	True
Bos_taurus	tRNA-Asn-GTT-1-7	chr3	21208569	21208643	+	28	-26.4	80.9	-0.092986486	12	0.080103359	0.762250454	-0.14435	4	5	active	0.749632689	True
Bos_taurus	tRNA-Asn-GTT-1-8	chr3	21227257	21227331	-	28	-26.4	80.9	0.12422973	12	0.069767442	0.538668719	-0.3278	5	5	active	0.809999191	True
Bos_taurus	tRNA-Asn-GTT-1-9	chr3	21318514	21318588	-	28	-26.4	80.9	0.124191781	12	0.072351421	0.682831661	-0.3278	7	0	active	0.806106403	False
Bos_taurus	tRNA-Asn-GTT-10-1	chr3	22836907	22836981	+	28	-23.4	73.6	0.010013514	36	0.034883721	0.642033543	-0.5754	1	16	active	0.685496672	True
Bos_taurus	tRNA-Asn-GTT-11-1	chr23	31274844	31274918	-	28	-24.4	60.8	-0.082418919	186	0.023255814	0.690140845	-0.0376	0	26	active	0.502020137	True
Bos_taurus	tRNA-Asn-GTT-12-1	chr3	21242778	21242852	+	28	-20.3	67.5	-0.349283784	10	0.042635659	0.734312417	-0.5108	2	5	active	0.714946892	False
Bos_taurus	tRNA-Asn-GTT-12-2	chr3	21260759	21260833	+	28	-20.3	67.5	-0.296932432	10	0.043927649	0.734312417	-0.671	5	5	active	0.776070704	False
Bos_taurus	tRNA-Asn-GTT-2-1	chr3	21350555	21350629	-	28	-26.4	79.9	0.124216216	13	0.062015504	0.865979381	-0.7902	1	0	active	0.858000131	True
Bos_taurus	tRNA-Asn-GTT-2-2	chr3	22854455	22854529	-	28	-26.4	79.9	-0.054472973	37	0.056847545	0.883838384	-0.7346	1	16	active	0.753624283	True
Bos_taurus	tRNA-Asn-GTT-3-1	chr3	21442888	21442962	-	28	-25.9	77.1	-1.018635135	11	0.0374677	0.44397463	-1.182105263	5	21	active	0.843011455	True
Bos_taurus	tRNA-Asn-GTT-4-1	chr13	23624296	23624370	-	28	-26.1	78.8	1.421959459	8	0.067183463	0.714285714	-3.32375	0	1	active	0.925978718	True
Bos_taurus	tRNA-Asn-GTT-5-1	chr3	20944126	20944200	-	28	-26.4	75.2	0.468391892	13	0.059431525	0.720411664	-1.59745	4	22	active	0.903857394	True
Bos_taurus	tRNA-Asn-GTT-6-1	chr3	21139056	21139130	-	28	-24.5	73.5	0.031486486	10	0.047803618	0.780780781	-0.71485	3	8	active	0.811324634	True
Bos_taurus	tRNA-Asn-GTT-7-1	chr3	21378531	21378605	-	28	-26.4	80.9	0.080689189	10	0.049095607	0.745188213	-0.492470588	3	0	active	0.79753336	True
Bos_taurus	tRNA-Asn-GTT-8-1	chr3	21147446	21147520	-	28	-21.9	72.2	-0.005864865	11	0.055555556	0.510204082	-0.26855	2	8	active	0.705596428	True
Bos_taurus	tRNA-Asn-GTT-9-1	chr3	8007512	8007586	-	28	-26.8	81.6	1.135202703	11	0.043927649	0.74484767	-4.35305	0	20	active	0.915324883	True
Bos_taurus	tRNA-Asp-ATC-1-1	chr3	110433756	110433829	+	2	-19.5	56.5	-0.229465753	131	0.009055627	0.273794003	0.0563	0	31	inactive	-0.900012146	True
Bos_taurus	tRNA-Asp-ATC-2-1	chr17	48732557	48732630	-	2	-24	53	-0.035986301	165	0.014230272	0.324074074	-0.0613	0	0	inactive	-0.89945947	True
Bos_taurus	tRNA-Asp-GTC-1-1	chr5	63016479	63016551	+	21	-26.4	65.4	1.082666667	11	0.038860104	0.342130987	-4.18125	0	21	active	0.891946494	True
Bos_taurus	tRNA-Asp-GTC-10-1	chr25	20392007	20392081	-	21	-20.9	61.2	-0.106567568	160	0.006459948	0.174825175	-0.29505	0	38	inactive	-0.943406491	True
Bos_taurus	tRNA-Asp-GTC-11-1	chr7	15748125	15748198	-	21	-17.5	58	0.030369863	179	0.003880983	0	0.10025	0	83	inactive	-0.951868879	True
Bos_taurus	tRNA-Asp-GTC-12-1	chr17	56417645	56417718	+	21	-19.7	56.6	0.101794521	351	0.007761966	0.135606354	-0.05785	0	19	inactive	-0.942586463	True
Bos_taurus	tRNA-Asp-GTC-13-1	chrX	141749485	141749557	+	21	-15.4	55.9	-0.010861111	351	0.002590674	0	0.0328	0	0	inactive	-0.958885034	True
Bos_taurus	tRNA-Asp-GTC-2-1	chr3	8019954	8020026	-	21	-26.4	66.5	0.640638889	9	0.031088083	0.649350649	-3.46025	2	15	active	0.985963066	True
Bos_taurus	tRNA-Asp-GTC-2-2	chr3	8111824	8111896	-	21	-26.4	66.5	?	11	0.101036269	0.806705081	?	7	5	active	0.948091429	True
Bos_taurus	tRNA-Asp-GTC-2-3	chr3	8114683	8114755	+	21	-26.4	66.5	-0.108236111	11	0.120466321	0.890066225	-0.3738	5	4	active	0.74995494	True
Bos_taurus	tRNA-Asp-GTC-2-4	chr5	60678960	60679032	+	21	-26.4	66.5	1.594763889	12	0.028497409	0.60483871	-2.8928	0	45	active	0.986614919	True
Bos_taurus	tRNA-Asp-GTC-2-5	chr17	53128219	53128291	+	21	-26.4	66.5	0.731194444	12	0.041450777	0.734329924	-2.6871	4	35	active	0.9874114	True
Bos_taurus	tRNA-Asp-GTC-2-6	chr17	53131190	53131262	+	21	-26.4	66.5	1.515527778	8	0.04015544	0.896286812	-4.76195	4	35	active	0.9884421	True
Bos_taurus	tRNA-Asp-GTC-2-7	chr19	28460394	28460466	-	21	-26.4	66.5	1.402319444	14	0.033678756	0.577045022	-4.8169	6	117	active	0.9878248	True
Bos_taurus	tRNA-Asp-GTC-2-8	chr23	30858998	30859070	+	21	-26.4	66.5	-0.287888889	14	0.028497409	0.482625483	-1.3192	5	7	active	0.868079211	True
Bos_taurus	tRNA-Asp-GTC-2-9	chr23	30940463	30940535	-	21	-26.4	66.5	0.244513889	12	0.047927461	0.750428816	-1.84275	4	14	active	0.979449798	True
Bos_taurus	tRNA-Asp-GTC-3-1	chr3	8095654	8095726	-	21	-26.4	66.5	?	11	0.115284974	1.071695295	?	4	10	active	0.929053844	True
Bos_taurus	tRNA-Asp-GTC-4-1	chr3	77509029	77509101	-	21	-19.8	55.5	0.074430556	11	0.016839378	0.209080048	0.0026	0	20	inactive	-0.883288383	True
Bos_taurus	tRNA-Asp-GTC-5-1	chr3	3317636	3317708	-	21	-18.7	50.4	?	351	0.022020725	0.459016393	-0.27075	0	19	inactive	-0.584052676	True
Bos_taurus	tRNA-Asp-GTC-6-1	chr9	62555410	62555482	-	21	-17.4	51.6	-0.017305556	255	0.011658031	0	-0.45875	0	0	inactive	-0.933259782	True
Bos_taurus	tRNA-Asp-GTC-7-1	chr10	17931837	17931909	+	21	-20.2	53.1	0	11	0.03626943	0.517314189	-0.53945	0	3	active	0.534721048	True
Bos_taurus	tRNA-Asp-GTC-8-1	chr18	36741316	36741388	-	21	-17.7	52.8	0.029180556	11	0.010362694	0.14957265	0.2655	0	10	inactive	-0.924528796	True
Bos_taurus	tRNA-Asp-GTC-9-1	chr19	46561736	46561809	-	21	-18.4	55	0	85	0.007761966	0.707070707	-0.0149	0	10	inactive	-0.626128976	True
Bos_taurus	tRNA-Cys-ACA-1-1	chr1	87887468	87887540	+	1	-16.6	61.5	0	256	0.012953368	0.305944056	0.02365	0	16	inactive	-0.916683058	True
Bos_taurus	tRNA-Cys-GCA-1-1	chr19	40088101	40088173	+	39	-26.1	81.9	1.335375	7	0.009067358	0.086419753	-3.45375	2	31	inactive	-0.655982784	True
Bos_taurus	tRNA-Cys-GCA-1-2	chr19	40295072	40295144	-	39	-26.1	81.9	1.550694444	8	0.024611399	0.571661903	-2.21285	1	46	active	0.93983094	True
Bos_taurus	tRNA-Cys-GCA-1-3	chr19	40295806	40295878	-	39	-26.1	81.9	1.541083333	15	0.03238342	0.307017544	-4.1524	1	46	active	0.78348037	True
Bos_taurus	tRNA-Cys-GCA-10-1	chr4	113355172	113355244	-	39	-22	73.1	0.489888889	177	0.029792746	0.462147887	-1.42925	2	34	active	0.769185979	True
Bos_taurus	tRNA-Cys-GCA-11-1	chr4	113326403	113326475	+	39	-26.1	73.2	0.085388889	12	0.011658031	0.19509476	0.04245	2	35	inactive	-0.946789231	True
Bos_taurus	tRNA-Cys-GCA-12-1	chr3	22835027	22835099	-	39	-23.9	73.1	0.057083333	12	0.007772021	0	-0.19735	1	16	inactive	-0.951026462	True
Bos_taurus	tRNA-Cys-GCA-13-1	chr4	113198312	113198384	-	39	-19.9	74.4	0.127708333	12	0.007772021	0.236406619	-2.3896	3	17	inactive	-0.808601238	True
Bos_taurus	tRNA-Cys-GCA-14-1	chr28	5903031	5903103	+	39	-12.9	61.7	-0.038166667	351	0.010362694	0.189155107	-0.19595	0	15	inactive	-0.976925674	True
Bos_taurus	tRNA-Cys-GCA-15-1	chr26	39899326	39899416	-	39	-28.9	58.7	-0.030164384	351	0.032911392	0.434782609	-0.3559	0	14	inactive	-0.531366931	True
Bos_taurus	tRNA-Cys-GCA-16-1	chr12	58854640	58854712	-	39	-20.3	67	-0.060387755	268	0.00388601	0.065888554	-0.38995	0	6	inactive	-0.959101898	True
Bos_taurus	tRNA-Cys-GCA-17-1	chr27	11144061	11144133	-	39	-19.6	64.3	0.079402778	330	0.009067358	0.2843987	-0.5129	0	2	inactive	-0.933982539	True
Bos_taurus	tRNA-Cys-GCA-18-1	chr15	60104706	60104778	-	39	-19.5	63.5	-0.4959	351	0.010362694	0.193441415	-0.2205	0	0	inactive	-0.93130983	True
Bos_taurus	tRNA-Cys-GCA-19-1	chr6	19772348	19772420	-	39	-20	64.8	?	236	0.006476684	0.212121212	0.235333333	0	0	inactive	-0.957881421	True
Bos_taurus	tRNA-Cys-GCA-19-2	chr15	67680281	67680353	+	39	-20	64.8	-0.264736111	167	0.005181347	0.107526882	0.02525	0	14	inactive	-0.933508323	True
Bos_taurus	tRNA-Cys-GCA-2-1	chr4	113190346	113190418	+	39	-24.6	81.8	0.445638889	9	0.011658031	0.175649905	-1.48225	3	17	inactive	-0.74795052	True
Bos_taurus	tRNA-Cys-GCA-20-1	chr3	57517818	57517890	-	39	-22.6	62.9	0.007805556	126	0.010362694	0.126995646	0.12225	0	31	inactive	-0.95472337	True
Bos_taurus	tRNA-Cys-GCA-21-1	chr7	90257233	90257305	+	39	-20	61.1	0	134	0.00388601	0	0.0493	0	6	inactive	-0.94951053	True
Bos_taurus	tRNA-Cys-GCA-22-1	chr5	43274867	43274939	-	39	-18.3	63.1	?	232	0.009067358	0.073560319	-0.538266667	0	25	inactive	-0.941378585	True
Bos_taurus	tRNA-Cys-GCA-23-1	chr8	102052246	102052318	-	39	-14.9	61.4	0.073555556	146	0.012953368	0.118323191	-0.00925	0	4	inactive	-0.955555868	True
Bos_taurus	tRNA-Cys-GCA-24-1	chr18	35714949	35715021	-	39	-20.9	62.7	-0.006708333	303	0.006476684	0	-0.1775	0	48	inactive	-0.960534723	True
Bos_taurus	tRNA-Cys-GCA-25-1	chr4	75538949	75539041	-	39	-19.7	57.4	0.002493151	351	0.01010101	0.150948821	-0.5629	0	23	inactive	-0.984277387	True
Bos_taurus	tRNA-Cys-GCA-3-1	chr19	40090179	40090251	-	39	-23.9	81.8	1.528555556	6	0.049222798	0.854202037	-1.7664	2	33	active	0.959552045	True
Bos_taurus	tRNA-Cys-GCA-4-1	chr4	113224087	113224159	-	39	-26.1	77.3	0.355041667	12	0.027202073	0.471014493	-2.20445	1	13	active	0.863548545	True
Bos_taurus	tRNA-Cys-GCA-4-2	chr4	113360059	113360131	-	39	-26.1	77.3	0.407527778	5	0.014248705	0.407925408	-1.6678	2	37	inactive	-0.565810643	True
Bos_taurus	tRNA-Cys-GCA-4-3	chr12	30312708	30312780	+	39	-26.1	77.3	-0.052180556	11	0.011658031	0.070993915	-0.65425	0	8	inactive	-0.924467886	True
Bos_taurus	tRNA-Cys-GCA-4-4	chr19	40067568	40067640	-	39	-26.1	77.3	0.968291667	13	0.007772021	0.113636364	-3.1038	0	34	inactive	-0.818709738	True
Bos_taurus	tRNA-Cys-GCA-4-5	chr19	40084728	40084800	-	39	-26.1	77.3	0.911277778	11	0.015544041	0.35443038	-1.3886	2	33	inactive	-0.717719576	True
Bos_taurus	tRNA-Cys-GCA-5-1	chr4	113191646	113191718	+	39	-24.6	77.2	0.305361111	12	0.007772021	0.177642431	-0.97905	3	16	inactive	-0.916918403	True
Bos_taurus	tRNA-Cys-GCA-5-2	chr4	113211856	113211928	-	39	-24.6	77.2	0.393569444	14	0.007772021	0.104321908	-2.1896	1	13	inactive	-0.862049257	True
Bos_taurus	tRNA-Cys-GCA-5-3	chr4	113324139	113324211	+	39	-24.6	77.2	0.467861111	13	0.012953368	0.295807978	-1.4559	2	35	inactive	-0.841933513	True
Bos_taurus	tRNA-Cys-GCA-5-4	chr4	113327790	113327862	+	39	-24.6	77.2	0.024759259	11	0.009067358	0.053313024	-1.297733333	3	35	inactive	-0.862835815	True
Bos_taurus	tRNA-Cys-GCA-5-5	chr4	113340795	113340867	+	39	-24.6	77.2	0.302041667	2	0.016839378	0.140449438	-1.7279	1	32	inactive	-0.723939252	True
Bos_taurus	tRNA-Cys-GCA-5-6	chr4	113363848	113363920	+	39	-24.6	77.2	0.478763889	13	0.006476684	0.139516343	-0.78335	2	42	inactive	-0.937807458	True
Bos_taurus	tRNA-Cys-GCA-5-7	chr4	113542909	113542981	-	39	-24.6	77.2	0.463333333	12	0.002590674	0	-0.87255	1	79	inactive	-0.922057329	True
Bos_taurus	tRNA-Cys-GCA-6-1	chr4	113217940	113218012	-	39	-23.9	77.1	0.095763889	351	0.005181347	0.081967213	-1.83515	2	10	inactive	-0.901085952	True
Bos_taurus	tRNA-Cys-GCA-7-1	chr4	113196638	113196710	-	39	-24.6	74	0.701569444	4	0.012953368	0.267584098	-1.4865	3	17	inactive	-0.682189207	True
Bos_taurus	tRNA-Cys-GCA-7-2	chr4	113336673	113336745	+	39	-24.6	74	0.732555556	13	0.005181347	0.126506024	-1.07625	2	32	inactive	-0.902626161	True
Bos_taurus	tRNA-Cys-GCA-8-1	chr4	113178959	113179031	+	39	-23.9	81.1	0.453763889	2	0.010362694	0.057765308	-1.14965	0	16	inactive	-0.792622549	True
Bos_taurus	tRNA-Cys-GCA-9-1	chr4	113546427	113546499	+	39	-25.8	74.8	0.457444444	5	0.015544041	0.45617465	-1.761	1	74	active	0.545409438	True
Bos_taurus	tRNA-Gln-CTG-1-1	chr10	12690609	12690681	-	24	-24.7	71.5	1.533805556	13	0.042746114	0.740740741	-2.6037	0	25	active	0.988393973	True
Bos_taurus	tRNA-Gln-CTG-1-2	chr19	28373265	28373337	+	24	-24.7	71.5	1.355236111	5	0.022020725	0.867768595	-4.7383	4	102	active	0.980911325	True
Bos_taurus	tRNA-Gln-CTG-1-3	chr23	29896883	29896955	+	24	-24.7	71.5	1.120013889	15	0.025906736	0.116086235	-3.5998	4	25	active	0.803306486	True
Bos_taurus	tRNA-Gln-CTG-1-4	chr23	30930716	30930788	-	24	-24.7	71.5	0.543152778	6	0.033678756	0.901253918	-1.40515	7	14	active	0.979119865	True
Bos_taurus	tRNA-Gln-CTG-10-1	chr3	21175561	21175633	-	24	-19.3	56.2	-0.444	25	0.045336788	0.351607348	-0.98155	4	8	inactive	-0.503516199	True
Bos_taurus	tRNA-Gln-CTG-11-1	chr23	47095690	47095762	+	24	-19.9	55.9	0	351	0.03238342	0.544708546	-0.0922	0	7	inactive	-0.625358758	True
Bos_taurus	tRNA-Gln-CTG-12-1	chr26	7313029	7313101	-	24	-13.3	51.9	0.030791667	219	0.006476684	0.138339921	-0.1295	0	1	inactive	-0.944661087	True
Bos_taurus	tRNA-Gln-CTG-13-1	chr12	19568840	19568915	-	24	-16.7	52	0	52	0.00516129	0	-0.0505	0	28	inactive	-0.937763486	True
Bos_taurus	tRNA-Gln-CTG-14-1	chr12	62251426	62251498	+	24	-16.9	55.6	0.077041667	232	0.00388601	0.071560008	-0.71075	0	0	inactive	-0.95276981	True
Bos_taurus	tRNA-Gln-CTG-15-1	chr7	3186226	3186299	+	24	-18.6	54.8	0.057917808	241	0.007761966	0.190631808	0.0423	0	9	inactive	-0.960995444	True
Bos_taurus	tRNA-Gln-CTG-16-1	chr5	39604130	39604203	-	24	-20.5	54.2	0.054684932	144	0.010349288	0.260416667	-0.1894	0	1	inactive	-0.914773475	True
Bos_taurus	tRNA-Gln-CTG-2-1	chr23	30884666	30884738	+	24	-24.2	70.5	0.9255	7	0.015544041	0.556586271	-2.33465	5	2	active	0.701014433	True
Bos_taurus	tRNA-Gln-CTG-3-1	chr3	22852278	22852350	+	24	-24.2	72.1	-0.510222222	25	0.073834197	0.781738587	-0.8044	1	19	active	0.906239436	True
Bos_taurus	tRNA-Gln-CTG-4-1	chr3	21027596	21027668	-	24	-24.2	71.1	-0.476013889	25	0.050518135	0.571817563	-0.6896	4	10	active	0.843369794	True
Bos_taurus	tRNA-Gln-CTG-4-2	chr3	21203592	21203664	-	24	-24.2	71.1	-0.430930556	25	0.054404145	0.392621214	-1.05955	4	5	active	0.749428227	True
Bos_taurus	tRNA-Gln-CTG-4-3	chr3	21228517	21228589	+	24	-24.2	71.1	-0.378569444	25	0.047927461	0.693435477	-0.97025	5	5	active	0.929618807	True
Bos_taurus	tRNA-Gln-CTG-4-4	chr3	21319779	21319851	+	24	-24.2	71.1	-0.433513889	25	0.051813472	0.657012604	-0.77635	7	0	active	0.883260956	True
Bos_taurus	tRNA-Gln-CTG-4-5	chr3	21449840	21449912	+	24	-24.2	71.1	-0.378569444	26	0.031088083	0.360400118	-1.06005	6	26	active	0.668885833	False
Bos_taurus	tRNA-Gln-CTG-4-6	chr3	21450799	21450871	+	24	-24.2	71.1	-0.378569444	26	0.055699482	0.360400118	-1.0641	6	26	active	0.720625922	False
Bos_taurus	tRNA-Gln-CTG-5-1	chr3	20999411	20999483	-	24	-24.4	73.1	-0.429	19	0.034974093	0.249287749	-0.7393	3	10	active	0.579475505	True
Bos_taurus	tRNA-Gln-CTG-6-1	chr23	30778161	30778233	+	24	-22	66.9	0.498138889	12	0.014248705	0.328207052	-3.2451	4	32	inactive	-0.595934779	True
Bos_taurus	tRNA-Gln-CTG-7-1	chr4	100661361	100661433	+	24	-19.7	57.7	0.101097222	6	0.00388601	0.115740741	-0.75305	0	4	inactive	-0.897197207	True
Bos_taurus	tRNA-Gln-CTG-8-1	chr1	111956829	111956901	-	24	-19.7	60.7	0.001527778	7	0.010362694	0.108258583	-0.3677	0	9	inactive	-0.927188438	True
Bos_taurus	tRNA-Gln-CTG-9-1	chr16	25638756	25638828	-	24	-18.8	54.4	0.005611111	351	0.012953368	0.298062593	-0.05955	0	0	inactive	-0.934007793	True
Bos_taurus	tRNA-Gln-TTG-1-1	chr19	38011243	38011315	-	15	-27.1	72.6	1.630513889	9	0.071243523	0.730745438	0.1454	0	29	active	0.954577964	True
Bos_taurus	tRNA-Gln-TTG-10-1	chr7	25616368	25616440	+	15	-21.3	65.3	-0.080194444	125	0.007772021	0.249554367	-0.18905	0	12	inactive	-0.918054515	True
Bos_taurus	tRNA-Gln-TTG-11-1	chr5	98309229	98309302	+	15	-24.9	58.8	0.047821918	106	0.010349288	0.400326797	0.08	0	0	inactive	-0.706420809	True
Bos_taurus	tRNA-Gln-TTG-12-1	chrX	9967171	9967243	+	15	-17.5	52	0.026180556	93	0	0	0.02155	0	0	inactive	-0.924201545	True
Bos_taurus	tRNA-Gln-TTG-13-1	chr7	17111722	17111796	+	15	-16.4	54.3	0.102	151	0.015503876	0	-0.10085	0	63	inactive	-0.954536682	True
Bos_taurus	tRNA-Gln-TTG-2-1	chr19	50740338	50740410	+	15	-22.7	70.8	-0.112513889	1	0.019430052	0.274509804	-0.64375	1	53	inactive	-0.626981733	True
Bos_taurus	tRNA-Gln-TTG-3-1	chr23	30058291	30058363	-	15	-27.1	70	0.426333333	12	0.049222798	0.704508857	-1.43915	3	12	active	0.979032314	True
Bos_taurus	tRNA-Gln-TTG-4-1	chr23	30774251	30774323	+	15	-22	66.9	0.985263889	22	0.024611399	0.063199711	-2.86425	2	32	active	0.771411026	True
Bos_taurus	tRNA-Gln-TTG-4-2	chr23	31448985	31449057	+	15	-22	66.9	0.719111111	3	0.028497409	0.677419355	-2.48625	9	40	active	0.932477639	True
Bos_taurus	tRNA-Gln-TTG-4-3	chr23	31449548	31449620	+	15	-22	66.9	-0.02875	7	0.019430052	0.435865504	-0.853	9	39	active	0.655703942	True
Bos_taurus	tRNA-Gln-TTG-5-1	chr3	22684168	22684240	-	15	-22	54.6	-0.620771429	18	0.037564767	0.786516854	-1.129611111	0	21	active	0.697243637	True
Bos_taurus	tRNA-Gln-TTG-6-1	chr10	72631614	72631686	-	15	-16.4	53.8	0.086708333	138	0.010362694	0.243055556	0.02275	0	18	inactive	-0.921129023	True
Bos_taurus	tRNA-Gln-TTG-7-1	chr17	73470870	73470943	-	15	-22.2	55.9	0.12428125	351	0.010349288	0.098563785	-0.01555	0	83	inactive	-0.92693845	True
Bos_taurus	tRNA-Gln-TTG-8-1	chr25	34046694	34046774	-	15	-24.1	58.4	0.014486111	52	0.01025641	0.231481481	-0.2086	0	50	inactive	-0.934361265	True
Bos_taurus	tRNA-Gln-TTG-9-1	chr19	18149076	18149148	-	15	-16.4	55.1	-0.035722222	53	0.015544041	0.314295977	0.1693	0	34	inactive	-0.932001767	True
Bos_taurus	tRNA-Glu-CTC-1-1	chr3	8110641	8110713	-	8	-26.4	73.2	?	78	0.080310881	0.87258271	?	7	6	active	0.926708199	True
Bos_taurus	tRNA-Glu-CTC-1-2	chr3	21457742	21457814	-	8	-26.4	73.2	1.228736111	7	0.025906736	0.681596884	-3.93305	2	26	active	0.987447076	True
Bos_taurus	tRNA-Glu-CTC-1-3	chr7	44000402	44000474	+	8	-26.4	73.2	0.962652778	5	0.050518135	0.882782424	-2.6955	1	35	active	0.987466758	True
Bos_taurus	tRNA-Glu-CTC-1-4	chr23	29874145	29874217	-	8	-26.4	73.2	0.858319444	11	0.033678756	0.593507752	-3.1592	2	26	active	0.987189584	True
Bos_taurus	tRNA-Glu-CTC-2-1	chr3	8094448	8094520	-	8	-24.3	72.2	?	61	0.077720207	0.940400586	?	4	10	active	0.936084179	True
Bos_taurus	tRNA-Glu-CTC-3-1	chr2	824303	824376	+	8	-23.9	65.2	0.118616438	351	0.014230272	0.137254902	0.041	0	47	inactive	-0.898753781	True
Bos_taurus	tRNA-Glu-CTC-4-1	chr16	4769146	4769219	+	8	-22.2	72.9	0.025739726	56	0.007761966	0.155279503	-0.05935	0	45	inactive	-0.90401151	True
Bos_taurus	tRNA-Glu-CTC-5-1	chr20	33957035	33957108	-	8	-18.3	68	0.039027397	351	0.005174644	0.222222222	0.1653	0	0	inactive	-0.928832639	True
Bos_taurus	tRNA-Glu-TTC-1-1	chr3	20943568	20943640	-	39	-26.4	73.2	-0.241361111	15	0.047927461	0.934025204	-0.248333333	4	22	active	0.775202825	True
Bos_taurus	tRNA-Glu-TTC-1-2	chr9	25853593	25853665	+	39	-26.4	73.2	1.204361111	7	0.03626943	0.897742818	-3.3417	0	9	active	0.895056657	True
Bos_taurus	tRNA-Glu-TTC-10-1	chr23	18751406	18751479	-	39	-23.5	67.2	0.014383562	133	0.009055627	0	0.123	0	6	inactive	-0.945695239	True
Bos_taurus	tRNA-Glu-TTC-11-1	chr5	75316724	75316796	-	39	-16.2	67.9	-0.046361111	300	0.014248705	0.176767677	0.00925	0	33	inactive	-0.970100247	True
Bos_taurus	tRNA-Glu-TTC-12-1	chr13	78227591	78227664	+	39	-18.4	68.3	0.100123288	351	0.009055627	0.076855512	-0.2286	0	6	inactive	-0.941960296	True
Bos_taurus	tRNA-Glu-TTC-13-1	chr2	126673490	126673562	+	39	-21.7	62.5	-0.001611111	112	0.009067358	0.114541289	0.2651	0	18	inactive	-0.950473286	True
Bos_taurus	tRNA-Glu-TTC-14-1	chr19	23149242	23149315	+	39	-25.5	73.4	0.01930137	351	0.014230272	0.252525253	-0.0384	0	60	inactive	-0.938190929	True
Bos_taurus	tRNA-Glu-TTC-15-1	chr19	43502513	43502586	-	39	-21.1	60.5	0.106082192	351	0.010349288	0.17721519	-0.4314	0	86	inactive	-0.948070248	True
Bos_taurus	tRNA-Glu-TTC-16-1	chr23	17105642	17105715	-	39	-16.8	61.6	0.018506849	272	0.002587322	0	-0.23575	0	89	inactive	-0.953709889	True
Bos_taurus	tRNA-Glu-TTC-17-1	chr18	54747203	54747276	+	39	-21	54.5	0.079753425	43	0.01164295	0.345849802	-0.0378	0	48	inactive	-0.871129825	True
Bos_taurus	tRNA-Glu-TTC-18-1	chr7	44870980	44871053	+	39	-22.7	65.2	-0.081876712	145	0.009055627	0.23828976	-0.2136	0	82	inactive	-0.938516171	True
Bos_taurus	tRNA-Glu-TTC-19-1	chr7	77625995	77626068	-	39	-20.1	67.8	?	351	0.009055627	0.373191165	?	0	0	inactive	-0.892940039	True
Bos_taurus	tRNA-Glu-TTC-2-1	chr3	21066262	21066334	-	39	-26.4	68.7	-0.071930556	66	0.044041451	0.627773058	-0.343210526	4	3	active	0.719786084	True
Bos_taurus	tRNA-Glu-TTC-2-2	chr3	21178088	21178160	+	39	-26.4	68.7	0.124416667	66	0.045336788	0.680272109	-0.03785	4	8	active	0.795345123	False
Bos_taurus	tRNA-Glu-TTC-2-3	chr3	21209839	21209911	+	39	-26.4	68.7	-0.109605634	66	0.042746114	0.621495327	-0.046315789	4	5	active	0.721647556	False
Bos_taurus	tRNA-Glu-TTC-2-4	chr3	21225990	21226062	-	39	-26.4	68.7	0.124486111	66	0.04015544	0.595535982	-0.0374	5	5	active	0.78612485	False
Bos_taurus	tRNA-Glu-TTC-2-5	chr3	21253524	21253596	+	39	-26.4	68.7	?	66	0.044041451	0.621495327	?	5	5	active	0.851159001	False
Bos_taurus	tRNA-Glu-TTC-2-6	chr3	21414467	21414539	+	39	-26.4	68.7	0.050430556	3	0.075129534	0.598290598	-0.8326	4	5	active	0.860010295	False
Bos_taurus	tRNA-Glu-TTC-2-7	chr3	21422401	21422473	-	39	-26.4	68.7	0.173569444	3	0.075129534	0.598290598	-0.8696	4	12	active	0.878645493	False
Bos_taurus	tRNA-Glu-TTC-2-8	chr3	21443948	21444020	-	39	-26.4	68.7	-0.078583333	5	0.04015544	0.589108911	-0.3492	5	21	active	0.764270225	True
Bos_taurus	tRNA-Glu-TTC-20-1	chr14	63873141	63873213	-	39	-23.5	66.8	0.052416667	351	0.006476684	0.164267835	-0.43775	0	6	inactive	-0.966444937	True
Bos_taurus	tRNA-Glu-TTC-21-1	chr22	50696604	50696676	+	39	-21.3	65.1	0.045958333	69	0.011658031	0.092458064	-0.3816	0	92	inactive	-0.932530301	True
Bos_taurus	tRNA-Glu-TTC-22-1	chr9	63039213	63039286	+	39	-14.7	65.7	0.030164384	184	0.001293661	0	-0.2718	0	0	inactive	-0.956273058	True
Bos_taurus	tRNA-Glu-TTC-23-1	chr9	42431043	42431115	-	39	-17	59.3	0.007833333	108	0.005181347	0.164319249	-0.028	0	14	inactive	-0.974763186	True
Bos_taurus	tRNA-Glu-TTC-24-1	chr1	84823001	84823073	-	39	-17.9	52.9	0.048694444	40	0.015544041	0.310559006	-0.163	0	26	inactive	-0.947026948	True
Bos_taurus	tRNA-Glu-TTC-25-1	chr17	7780756	7780829	+	39	-25.1	60.8	-0.093684932	351	0.006468305	0.109375	0.0185	0	2	inactive	-0.952060311	True
Bos_taurus	tRNA-Glu-TTC-26-1	chr25	35018006	35018078	+	39	-20.9	62.8	-0.142957746	351	0.006476684	0.19640853	0.07315	0	58	inactive	-0.941952567	True
Bos_taurus	tRNA-Glu-TTC-27-1	chr4	95943523	95943595	-	39	-24.4	61.1	0.053736111	203	0.001295337	0.137578616	-0.39595	0	17	inactive	-0.968206642	True
Bos_taurus	tRNA-Glu-TTC-28-1	chr5	68118343	68118416	+	39	-12.5	56.7	0.016109589	175	0.01164295	0.421122995	-0.0944	0	27	inactive	-0.826263391	True
Bos_taurus	tRNA-Glu-TTC-29-1	chr18	56381017	56381089	-	39	-13.7	54.3	0.045236111	274	0.006476684	0.164835165	-0.00125	0	115	inactive	-0.963570768	True
Bos_taurus	tRNA-Glu-TTC-3-1	chr2	1242934	1243006	-	39	-24.8	70.4	0.730986111	12	0.050518135	0.973411948	-2.55015	0	51	active	0.924211319	True
Bos_taurus	tRNA-Glu-TTC-30-1	chr29	29469572	29469645	+	39	-24.6	68.1	-0.042493151	150	0.003880983	0.084725248	-0.1635	0	26	inactive	-0.964289818	True
Bos_taurus	tRNA-Glu-TTC-4-1	chr12	15143699	15143771	-	39	-26.7	71.2	1.622319444	10	0.058290155	1.001695993	-3.9236	0	15	active	0.927771011	True
Bos_taurus	tRNA-Glu-TTC-4-2	chr21	3276865	3276937	-	39	-26.7	71.2	1.355222222	10	0.055699482	0.969827586	-3.83335	0	0	active	0.884942771	True
Bos_taurus	tRNA-Glu-TTC-5-1	chr3	20935913	20935985	+	39	-18.2	59.4	-0.046763889	8	0.055699482	0.819885476	-1.762684211	3	22	active	0.786209794	True
Bos_taurus	tRNA-Glu-TTC-6-1	chr2	128889749	128889821	-	39	-26.9	73.2	0.102	9	0.029792746	0.454840806	0.04425	0	26	active	0.759194107	True
Bos_taurus	tRNA-Glu-TTC-7-1	chr3	20907957	20908029	-	39	-21.2	59.4	-0.009929577	10	0.054404145	0.930356194	-1.70165	0	30	active	0.791540423	True
Bos_taurus	tRNA-Glu-TTC-8-1	chr23	47691246	47691319	+	39	-26.8	78.5	0.148	40	0.007761966	0.202702703	0.04275	0	34	inactive	-0.90219183	True
Bos_taurus	tRNA-Glu-TTC-9-1	chr7	103685320	103685392	-	39	-19	54.3	0	10	0.022020725	0.186434659	0.09785	0	11	inactive	-0.822446456	True
Bos_taurus	tRNA-Gly-CCC-1-1	chr3	21065481	21065552	+	39	-26.4	79.3	0.050535211	15	0.032425422	0.358312858	-0.38625	4	3	active	0.526548982	True
Bos_taurus	tRNA-Gly-CCC-1-2	chr3	21084724	21084795	+	39	-26.4	79.3	0.026	15	0.04150454	0.827423168	-0.69235	2	3	active	0.761427268	False
Bos_taurus	tRNA-Gly-CCC-1-3	chr3	21416792	21416863	-	39	-26.4	79.3	0.023323944	15	0.04150454	0.827423168	-0.61185	4	12	active	0.74601308	False
Bos_taurus	tRNA-Gly-CCC-1-4	chr3	21418303	21418374	-	39	-26.4	79.3	-0.434	6	0.027237354	0.508351489	-0.7155	4	12	active	0.724911932	True
Bos_taurus	tRNA-Gly-CCC-1-5	chr3	21420076	21420147	+	39	-26.4	79.3	0.026	15	0.04150454	0.827423168	-0.69235	4	12	active	0.786112101	False
Bos_taurus	tRNA-Gly-CCC-10-1	chr18	23968541	23968614	-	39	-24.5	72.1	-0.123	188	0.016817594	0.231328486	-0.5543	0	27	inactive	-0.881298504	True
Bos_taurus	tRNA-Gly-CCC-11-1	chr26	40096445	40096517	-	39	-19.5	69.1	0.006944444	103	0.005181347	0.17641129	-0.0379	0	23	inactive	-0.959503331	True
Bos_taurus	tRNA-Gly-CCC-12-1	chrX	54998341	54998413	-	39	-22.7	64.5	0.124194444	199	0.005181347	0	0.0176	0	31	inactive	-0.941525934	True
Bos_taurus	tRNA-Gly-CCC-13-1	chr17	47840787	47840860	-	39	-21	63.2	0.02509589	98	0.010349288	0.214460784	-0.377	0	0	inactive	-0.948426784	True
Bos_taurus	tRNA-Gly-CCC-14-1	chr22	18090790	18090862	-	39	-22.6	65.2	?	251	0.002590674	0.05574136	?	0	1	inactive	-0.955480295	True
Bos_taurus	tRNA-Gly-CCC-15-1	chr16	72303516	72303589	+	39	-20.7	72.6	0.008575342	351	0.007761966	0	-0.24085	0	10	inactive	-0.966118254	True
Bos_taurus	tRNA-Gly-CCC-16-1	chr11	101177958	101178031	+	39	-22.9	61.1	0.021821918	191	0.021992238	0.12908778	-0.06735	0	19	inactive	-0.76542585	True
Bos_taurus	tRNA-Gly-CCC-17-1	chr21	23685482	23685555	-	39	-17.5	63.1	-0.063931507	51	0.003880983	0	-0.2959	0	18	inactive	-0.949485602	True
Bos_taurus	tRNA-Gly-CCC-18-1	chr20	58158520	58158593	+	39	-30.1	63.4	0.036178082	122	0.006468305	0.235849057	-0.4789	0	0	inactive	-0.873738602	True
Bos_taurus	tRNA-Gly-CCC-19-1	chr15	49404783	49404856	-	39	-23	65.1	0.074369863	351	0.002587322	0	0.12285	0	14	inactive	-0.964571112	True
Bos_taurus	tRNA-Gly-CCC-2-1	chr3	21254299	21254370	-	39	-26.4	78.9	?	15	0.035019455	0.367892977	?	4	5	active	0.689331498	True
Bos_taurus	tRNA-Gly-CCC-20-1	chr6	93326151	93326224	+	39	-20.2	70.5	-0.016	48	0.012936611	0.449409348	-0.0084	0	13	inactive	-0.653422896	True
Bos_taurus	tRNA-Gly-CCC-21-1	chr23	3352798	3352871	-	39	-20.7	72.7	-0.403616438	83	0.007761966	0.264616935	0.03945	0	3	inactive	-0.878551	True
Bos_taurus	tRNA-Gly-CCC-22-1	chr1	132740189	132740262	-	39	-19.7	66	0.074273973	125	0.003880983	0.115074799	0.04145	0	0	inactive	-0.950550351	True
Bos_taurus	tRNA-Gly-CCC-23-1	chr25	38775678	38775751	-	39	-17.4	64.7	0.003328767	351	0.01164295	0.141129032	-0.3766	0	16	inactive	-0.973228705	True
Bos_taurus	tRNA-Gly-CCC-24-1	chr18	42704931	42705004	+	39	-20.7	76.2	-0.031356164	66	0.006468305	0.166719594	-0.66085	0	2	inactive	-0.946125505	True
Bos_taurus	tRNA-Gly-CCC-25-1	chr5	29377008	29377081	+	39	-22	66.7	0.094849315	27	0.006468305	0.086206897	-0.64205	0	41	inactive	-0.934129866	True
Bos_taurus	tRNA-Gly-CCC-26-1	chr25	21946737	21946810	+	39	-32.7	68.9	0.02809589	119	0.019404916	0.348953141	-0.1789	0	5	inactive	-0.611905921	True
Bos_taurus	tRNA-Gly-CCC-27-1	chr14	35823113	35823186	-	39	-27	64.7	0.124287671	351	0.002587322	0	-0.082	1	1	inactive	-0.905952665	True
Bos_taurus	tRNA-Gly-CCC-28-1	chr25	37908477	37908550	-	39	-19.1	64.8	0.058246575	144	0.014230272	0.36896479	0.02365	0	65	inactive	-0.902803227	True
Bos_taurus	tRNA-Gly-CCC-29-1	chr25	5188366	5188439	+	39	-22.5	66.7	0.056383562	258	0.01164295	0.369510135	0.02165	0	0	inactive	-0.89871006	True
Bos_taurus	tRNA-Gly-CCC-3-1	chr3	20923354	20923425	+	39	-24.5	75	0.078901408	14	0.018158236	0.137741047	0.02245	2	28	inactive	-0.750587915	True
Bos_taurus	tRNA-Gly-CCC-30-1	chr21	22112332	22112405	-	39	-22.8	68.1	0.058109589	351	0.010349288	0.11888587	-0.26135	0	118	inactive	-0.956204515	True
Bos_taurus	tRNA-Gly-CCC-31-1	chr15	25148868	25148941	+	39	-20.6	71.5	0.097041096	351	0.007761966	0.269645609	-0.39925	0	8	inactive	-0.925484045	True
Bos_taurus	tRNA-Gly-CCC-32-1	chrX	130349684	130349757	-	39	-21.9	65.1	0.09730137	351	0.014230272	0.150645624	0.0748	0	24	inactive	-0.956495331	True
Bos_taurus	tRNA-Gly-CCC-33-1	chr12	34125398	34125471	+	39	-23.6	65.8	0.080178082	84	0.009055627	0.284900285	0.0437	0	32	inactive	-0.901284772	True
Bos_taurus	tRNA-Gly-CCC-34-1	chr8	5204766	5204839	+	39	-17.7	64.7	0.100136986	75	0.010349288	0.307341061	-0.2181	0	3	inactive	-0.900014461	True
Bos_taurus	tRNA-Gly-CCC-4-1	chr3	21178850	21178921	-	39	-24	71.4	0.124084507	0	0.032425422	0.268758227	-0.41035	4	8	active	0.553082272	True
Bos_taurus	tRNA-Gly-CCC-5-1	chr28	40330919	40330990	+	39	-22	70.4	-0.011802817	14	0.007782101	0.178086839	-0.24525	0	0	inactive	-0.953108505	True
Bos_taurus	tRNA-Gly-CCC-6-1	chr3	21225220	21225291	+	39	-21.2	64.1	0.101535211	15	0.029831388	0.361570248	-0.647684211	5	5	active	0.547248197	True
Bos_taurus	tRNA-Gly-CCC-7-1	chr11	68527549	68527620	-	39	-31.4	75.1	1.265591549	5	0.049286641	1.077943615	-3.68895	0	39	active	0.925173948	True
Bos_taurus	tRNA-Gly-CCC-8-1	chr3	21031345	21031416	-	39	-18.4	62.6	0.072774648	15	0.023346304	0.30715226	-0.330578947	4	10	inactive	-0.628630406	True
Bos_taurus	tRNA-Gly-CCC-8-2	chr3	21314668	21314739	+	39	-18.4	62.6	0.073169014	15	0.022049287	0.226098191	-0.349947368	5	0	inactive	-0.635626362	True
Bos_taurus	tRNA-Gly-CCC-9-1	chr6	115452796	115452867	-	39	-24.2	69	0.009225352	20	0.023346304	0.3003003	-0.4293	0	32	inactive	-0.6671188	True
Bos_taurus	tRNA-Gly-GCC-1-1	chr2	39950234	39950305	+	14	-26.4	81	1.084943662	8	0.029831388	0.117924528	-4.32575	1	15	active	0.847802568	True
Bos_taurus	tRNA-Gly-GCC-1-2	chr3	8030457	8030528	+	14	-26.4	81	1.127816901	8	0.022049287	0.574712644	-3.1408	2	15	active	0.984588366	True
Bos_taurus	tRNA-Gly-GCC-1-3	chr18	1453951	1454022	-	14	-26.4	81	1.308830986	10	0.02075227	0.153256705	0.04325	2	29	active	0.546889996	True
Bos_taurus	tRNA-Gly-GCC-1-4	chr18	1454591	1454662	-	14	-26.4	81	1.297887324	7	0.02464332	0.231722312	-0.78325	2	29	active	0.675004967	True
Bos_taurus	tRNA-Gly-GCC-1-5	chr18	1461692	1461763	+	14	-26.4	81	0.846605634	12	0.033722438	0.338345865	-0.6462	2	39	active	0.727363443	True
Bos_taurus	tRNA-Gly-GCC-1-6	chr18	1857484	1857555	+	14	-26.4	81	0.977408451	12	0.062256809	0.775862069	-5.1366	0	69	active	0.987221665	True
Bos_taurus	tRNA-Gly-GCC-1-7	chr19	28379154	28379225	+	14	-26.4	81	0.974084507	7	0.058365759	0.575458636	-3.55975	5	112	active	0.987214843	True
Bos_taurus	tRNA-Gly-GCC-1-8	chr23	30708853	30708924	+	14	-26.4	81	1.098056338	11	0.031128405	0.597826087	-2.80545	1	29	active	0.983550827	True
Bos_taurus	tRNA-Gly-GCC-1-9	chr23	31446851	31446922	+	14	-26.4	81	0.681408451	11	0.023346304	0.758396533	-4.04535	11	41	active	0.923945834	True
Bos_taurus	tRNA-Gly-GCC-2-1	chr3	8104305	8104376	+	14	-28.8	80.9	0.290352113	14	0.101167315	0.979477612	-0.16155	9	10	active	0.816856055	True
Bos_taurus	tRNA-Gly-GCC-3-1	chr3	8112562	8112633	-	14	-26.8	72.9	0.30684507	13	0.09079118	0.90074282	-0.13105	7	4	active	0.880117071	True
Bos_taurus	tRNA-Gly-GCC-4-1	chr6	60918619	60918690	-	14	-17.1	67.6	0.070830986	10	0.005188067	0.064338235	0.12275	0	11	inactive	-0.905991755	True
Bos_taurus	tRNA-Gly-GCC-5-1	chr1	86120007	86120078	-	14	-18.9	65	-0.046140845	315	0.005188067	0	0.0424	0	2	inactive	-0.959121898	True
Bos_taurus	tRNA-Gly-GCC-6-1	chr21	61352180	61352303	-	14	-36.5	64.6	0.102287671	85	0.010935601	0.394207562	-0.0589	0	2	inactive	-0.633648421	True
Bos_taurus	tRNA-Gly-TCC-1-1	chr3	8020915	8020987	-	15	-25.1	73.8	0.956472222	7	0.04015544	0.701320132	-2.1097	3	15	active	0.984483007	True
Bos_taurus	tRNA-Gly-TCC-1-2	chr3	8094818	8094890	-	15	-25.1	73.8	?	11	0.112694301	1.104026846	?	4	10	active	0.941064098	True
Bos_taurus	tRNA-Gly-TCC-1-3	chr3	8111014	8111086	-	15	-25.1	73.8	?	11	0.133419689	1.108823064	?	7	6	active	0.882498304	True
Bos_taurus	tRNA-Gly-TCC-1-4	chr3	21393407	21393479	+	15	-25.1	73.8	1.307361111	9	0.027202073	0.694444444	-2.9969	3	0	active	0.974622675	True
Bos_taurus	tRNA-Gly-TCC-1-5	chr19	28459900	28459972	+	15	-25.1	73.8	1.111138889	6	0.029792746	0.710144928	-2.97315	6	117	active	0.987553391	True
Bos_taurus	tRNA-Gly-TCC-10-1	chr4	47062935	47063008	+	15	-19.2	58.3	0.080191781	47	0.015523933	0.361445783	-0.09595	0	10	inactive	-0.816558304	True
Bos_taurus	tRNA-Gly-TCC-11-1	chr11	6585740	6585813	-	15	-20.8	59.2	0.014328767	51	0.01164295	0.243664717	-0.37735	0	29	inactive	-0.930882385	True
Bos_taurus	tRNA-Gly-TCC-2-1	chr7	20640246	20640318	-	15	-25.1	73.8	0.929625	8	0.051813472	0.792202103	-4.15645	0	36	active	0.987643576	True
Bos_taurus	tRNA-Gly-TCC-3-1	chr6	75196786	75196858	+	15	-23.7	73	-0.049055556	206	0.014248705	0.208333333	-0.0594	0	2	inactive	-0.962050853	True
Bos_taurus	tRNA-Gly-TCC-4-1	chr6	103229182	103229255	+	15	-22.7	73.5	-0.013438356	152	0.006468305	0.135396518	0.14115	0	2	inactive	-0.942912117	True
Bos_taurus	tRNA-Gly-TCC-5-1	chr15	40865382	40865455	+	15	-18.6	72.8	?	124	0.009055627	0.231980116	-0.837636364	0	7	inactive	-0.892305852	True
Bos_taurus	tRNA-Gly-TCC-6-1	chr25	39306150	39306223	+	15	-25.7	67.1	-0.348356164	56	0.03622251	0.361090641	-0.163	0	23	active	0.568854224	True
Bos_taurus	tRNA-Gly-TCC-7-1	chrX	107522038	107522111	+	15	-20.4	65.1	0.123808219	62	0.002587322	0.080515298	-0.12905	0	19	inactive	-0.90836008	True
Bos_taurus	tRNA-Gly-TCC-8-1	chr12	30594435	30594508	+	15	-18.3	60.1	-0.072684932	351	0.012936611	0.333469443	-0.1743	0	17	inactive	-0.940662217	True
Bos_taurus	tRNA-Gly-TCC-9-1	chr22	48346979	48347052	+	15	-20.9	62.7	0.052246575	351	0.003880983	0.050636574	-0.0476	0	51	inactive	-0.972598974	True
Bos_taurus	tRNA-His-GTG-1-1	chr3	20919032	20919104	+	15	-25.5	60.1	0.416805556	15	0.045336788	0.741433022	-0.8384	2	29	active	0.978066064	True
Bos_taurus	tRNA-His-GTG-1-10	chr3	21382863	21382935	-	15	-25.5	60.1	0.123888889	25	0.03238342	0.629968502	-0.5387	1	0	active	0.876126968	True
Bos_taurus	tRNA-His-GTG-1-11	chr3	21394289	21394361	+	15	-25.5	60.1	1.29075	28	0.067357513	0.908018868	-1.186	3	0	active	0.965669315	True
Bos_taurus	tRNA-His-GTG-1-12	chr8	29781414	29781486	+	15	-25.5	60.1	0.932305556	14	0.019430052	0.299145299	-0.16295	0	4	inactive	-0.501024236	True
Bos_taurus	tRNA-His-GTG-1-13	chr10	65462234	65462306	-	15	-25.5	60.1	1.486777778	30	0.06865285	0.903954802	0.44995	2	70	active	0.950006397	True
Bos_taurus	tRNA-His-GTG-1-14	chr10	65462969	65463041	+	15	-25.5	60.1	1.591208333	33	0.054404145	0.784313725	-0.93465	2	71	active	0.978686446	True
Bos_taurus	tRNA-His-GTG-1-15	chr10	65464501	65464573	+	15	-25.5	60.1	1.427083333	34	0.041450777	0.552174893	0.0164	2	74	active	0.935173394	True
Bos_taurus	tRNA-His-GTG-1-2	chr3	20944853	20944925	+	15	-25.5	60.1	0.416805556	11	0.047927461	0.802752294	-0.6693	4	22	active	0.964603355	True
Bos_taurus	tRNA-His-GTG-1-3	chr3	21093316	21093388	-	15	-25.5	60.1	0.123958333	32	0.064766839	1.016019783	-0.035	2	3	active	0.887492476	False
Bos_taurus	tRNA-His-GTG-1-4	chr3	21142792	21142864	-	15	-25.5	60.1	0.123888889	25	0.042746114	0.964746845	-0.42855	2	8	active	0.892930878	True
Bos_taurus	tRNA-His-GTG-1-5	chr3	21270142	21270214	+	15	-25.5	60.1	0.123944444	32	0.051813472	1.008117308	0.02095	2	3	active	0.886445474	False
Bos_taurus	tRNA-His-GTG-1-6	chr3	21283793	21283865	+	15	-25.5	60.1	0.084194444	32	0.051813472	1.008117308	-0.5364	0	0	active	0.865516751	False
Bos_taurus	tRNA-His-GTG-1-7	chr3	21300689	21300761	+	15	-25.5	60.1	0.123944444	195	0.041450777	1.056763285	-0.53645	1	0	active	0.747328651	True
Bos_taurus	tRNA-His-GTG-1-8	chr3	21326126	21326198	-	15	-25.5	60.1	0.123958333	32	0.064766839	1.022727273	0.04535	6	0	active	0.868839537	False
Bos_taurus	tRNA-His-GTG-1-9	chr3	21351438	21351510	+	15	-25.5	60.1	0.123944444	31	0.050518135	0.857843137	0.04515	1	0	active	0.87906595	True
Bos_taurus	tRNA-Ile-AAT-1-1	chr19	28465497	28465571	-	17	-25.5	81.2	1.254108108	10	0.051679587	0.591216216	-4.24685	6	120	active	0.988586714	True
Bos_taurus	tRNA-Ile-AAT-1-10	chr23	30913555	30913629	+	17	-25.5	81.2	0.260135135	40	0.050387597	1.270417423	-1.1861	15	10	active	0.861695114	False
Bos_taurus	tRNA-Ile-AAT-1-11	chr23	31057999	31058073	+	17	-25.5	81.2	0.298283784	19	0.036175711	0.515886014	-0.7554	4	23	active	0.951348165	False
Bos_taurus	tRNA-Ile-AAT-1-12	chr23	31064986	31065060	-	17	-25.5	81.2	0.263148649	19	0.036175711	0.515886014	-0.7544	3	23	active	0.947980286	False
Bos_taurus	tRNA-Ile-AAT-1-13	chr23	31098083	31098157	+	17	-25.5	81.2	0.499486486	13	0.036175711	0.889704844	-2.4805	3	19	active	0.987050521	True
Bos_taurus	tRNA-Ile-AAT-1-14	chr23	31312887	31312961	-	17	-25.5	81.2	1.307756757	8	0.029715762	0.757575758	-3.57475	4	48	active	0.988001802	True
Bos_taurus	tRNA-Ile-AAT-1-15	chr23	31483884	31483958	+	17	-25.5	81.2	0.124148649	31	0.034883721	0.502873563	-0.53975	0	31	active	0.906128258	True
Bos_taurus	tRNA-Ile-AAT-1-2	chr21	68760605	68760679	+	17	-25.5	81.2	0.988662162	13	0.067183463	0.894886364	-3.3785	0	35	active	0.987590243	True
Bos_taurus	tRNA-Ile-AAT-1-3	chr23	30804999	30805073	-	17	-25.5	81.2	0.240581081	1	0.016795866	0.098870056	-0.58085	2	25	inactive	-0.769494021	True
Bos_taurus	tRNA-Ile-AAT-1-4	chr23	30806742	30806816	-	17	-25.5	81.2	0.502013514	13	0.036175711	0.751879699	-2.15285	3	23	active	0.98409784	True
Bos_taurus	tRNA-Ile-AAT-1-5	chr23	30820618	30820692	-	17	-25.5	81.2	0.288351351	12	0.029715762	0.480109739	-3.3322	6	20	active	0.982558905	True
Bos_taurus	tRNA-Ile-AAT-1-6	chr23	30907870	30907944	-	17	-25.5	81.2	0.242202703	7	0.045219638	0.695088044	-1.1033	10	10	active	0.885930408	False
Bos_taurus	tRNA-Ile-AAT-1-7	chr23	30908638	30908712	-	17	-25.5	81.2	0.242202703	7	0.041343669	0.695088044	-1.1033	10	10	active	0.885930408	False
Bos_taurus	tRNA-Ile-AAT-1-8	chr23	30911185	30911259	+	17	-25.5	81.2	0.260135135	40	0.052971576	0.841239722	-1.18585	13	10	active	0.876942818	False
Bos_taurus	tRNA-Ile-AAT-1-9	chr23	30912746	30912820	+	17	-25.5	81.2	0.260135135	40	0.054263566	0.841239722	-1.18585	15	10	active	0.876942818	True
Bos_taurus	tRNA-Ile-AAT-2-1	chr19	28442791	28442865	+	17	-25.5	80.6	1.596445946	13	0.041343669	0.887681159	-5.63825	3	113	active	0.988753601	True
Bos_taurus	tRNA-Ile-AAT-3-1	chr23	38090929	38091003	-	17	-16.5	70.4	0.007175676	2	0.012919897	0.096021948	-0.0272	0	0	inactive	-0.850166075	True
Bos_taurus	tRNA-Ile-TAT-1-1	chr18	49378189	49378282	-	7	-29.7	73.8	1.430797297	1	0.049180328	0.649033769	0.13865	0	128	active	0.963541209	True
Bos_taurus	tRNA-Ile-TAT-1-2	chr23	31153311	31153405	-	7	-32.8	73.7	0.774824324	3	0.042821159	0.521972559	-1.5316	1	9	active	0.979057982	True
Bos_taurus	tRNA-Ile-TAT-2-1	chr1	95121882	95121976	-	7	-33.5	73.1	0.715594595	2	0.032745592	0.533943555	-2.4075	2	14	active	0.9849978	True
Bos_taurus	tRNA-Ile-TAT-2-2	chr11	25217492	25217585	+	7	-30.2	73.2	1.420256757	6	0.088272383	0.884744142	0.2229	0	18	active	0.966283579	True
Bos_taurus	tRNA-Ile-TAT-2-3	chr23	30835097	30835191	-	7	-33.3	73.1	1.005662162	2	0.05163728	0.760869565	-0.7457	1	18	active	0.97154464	True
Bos_taurus	tRNA-Ile-TAT-3-1	chr23	14605588	14605661	-	7	-23	71.8	0.073808219	297	0.010349288	0	-0.03745	0	0	inactive	-0.91202586	True
Bos_taurus	tRNA-Ile-TAT-4-1	chr10	68506325	68506398	-	7	-19.9	59.6	0.121958904	158	0.005174644	0	0.0417	0	0	inactive	-0.881874908	True
Bos_taurus	tRNA-iMet-CAT-1-1	chr3	16772364	16772436	-	32	-26.1	60.4	1.585513889	6	0.033678756	0.762250454	-4.01595	0	77	active	0.942206182	True
Bos_taurus	tRNA-iMet-CAT-1-2	chr7	8534281	8534353	-	32	-26.1	60.4	0.124055556	4	0.012953368	0.102459016	-0.13985	0	64	inactive	-0.862773508	True
Bos_taurus	tRNA-iMet-CAT-1-3	chr12	21729664	21729736	-	32	-26.1	60.4	0.489333333	11	0.019430052	0.36036036	-2.2849	0	44	active	0.614556332	True
Bos_taurus	tRNA-iMet-CAT-1-4	chr23	30709280	30709352	+	32	-26.1	60.4	1.170708333	4	0.037564767	0.719054956	-4.20865	1	29	active	0.913410953	True
Bos_taurus	tRNA-iMet-CAT-1-5	chr23	30784681	30784753	-	32	-26.1	60.4	-0.082430556	4	0.028497409	0.643274854	-3.4914	5	32	active	0.838422198	True
Bos_taurus	tRNA-iMet-CAT-1-6	chr23	30892181	30892253	-	32	-26.1	60.4	0.180347222	12	0.014248705	0.232815965	-0.37615	5	7	inactive	-0.916986775	True
Bos_taurus	tRNA-iMet-CAT-1-7	chr23	31038894	31038966	+	32	-26.1	60.4	-0.1055	10	0.027202073	0.444484761	-3.1216	1	25	active	0.772211569	True
Bos_taurus	tRNA-iMet-CAT-1-8	chr23	31447285	31447357	+	32	-26.1	60.4	1.048013889	11	0.018134715	0.438596491	-2.70775	11	41	active	0.716092941	True
Bos_taurus	tRNA-iMet-CAT-1-9	chr23	31455880	31455952	-	32	-26.1	60.4	1.112902778	7	0.03238342	1.166666667	-4.75515	7	40	active	0.915481537	True
Bos_taurus	tRNA-iMet-CAT-2-1	chr18	55102818	55102890	-	32	-23.3	58.1	0.101763889	9	0.025906736	0.15625	-0.00415	0	51	inactive	-0.639781866	True
Bos_taurus	tRNA-iMet-CAT-3-1	chr19	50740035	50740107	+	32	-26.1	60.2	0.285111111	10	0.015544041	0.123784262	-2.0022	1	53	inactive	-0.843536695	True
Bos_taurus	tRNA-iMet-CAT-3-2	chr23	30855588	30855660	+	32	-26.1	60.2	0.696569444	40	0.029792746	0.803744921	-2.22025	5	7	active	0.878996134	True
Bos_taurus	tRNA-iMet-CAT-3-3	chr23	30918895	30918967	+	32	-26.1	60.2	0.305222222	7	0.037564767	0.713491475	-0.6477	13	11	active	0.747264486	False
Bos_taurus	tRNA-iMet-CAT-3-4	chr23	30919757	30919829	+	32	-26.1	60.2	0.320013889	7	0.044041451	0.713491475	-0.8126	13	11	active	0.812327097	False
Bos_taurus	tRNA-iMet-CAT-3-5	chr23	30920737	30920809	+	32	-26.1	60.2	0.320013889	7	0.044041451	0.87182971	-0.76155	12	11	active	0.799557498	True
Bos_taurus	tRNA-iMet-CAT-3-6	chr23	31436342	31436414	+	32	-26.1	60.2	0.505916667	8	0.019430052	0.16998543	-2.22115	5	49	active	0.549587835	True
Bos_taurus	tRNA-Leu-AAG-1-1	chr1	95182752	95182834	+	9	-30.7	74.8	0.259219512	79	0.028132992	0.718390805	-1.7451	4	17	active	0.945364344	True
Bos_taurus	tRNA-Leu-AAG-1-2	chr10	26471454	26471536	+	9	-30.7	74.8	0.31504878	7	0.029411765	0.493553586	-1.4383	5	18	active	0.97718029	True
Bos_taurus	tRNA-Leu-AAG-1-3	chr10	26516546	26516628	-	9	-30.7	74.8	1.231890244	5	0.049872123	0.628507295	-3.81015	3	17	active	0.988396952	True
Bos_taurus	tRNA-Leu-AAG-1-4	chr23	29870869	29870951	-	9	-30.7	74.8	0.633878049	6	0.046035806	0.757731959	-2.1343	2	26	active	0.984391791	True
Bos_taurus	tRNA-Leu-AAG-1-5	chr23	29892277	29892359	+	9	-30.7	74.8	0.620841463	6	0.034526854	0.584795322	-2.42845	5	25	active	0.986302773	True
Bos_taurus	tRNA-Leu-AAG-1-6	chr23	29998245	29998327	+	9	-30.7	74.8	0.124292683	4	0.02685422	0.336538462	-0.55915	4	6	active	0.777447996	True
Bos_taurus	tRNA-Leu-AAG-1-7	chr25	20180858	20180940	+	9	-30.7	74.8	1.547890244	8	0.066496164	0.768555116	-4.61385	0	47	active	0.988566947	True
Bos_taurus	tRNA-Leu-AAG-2-1	chr7	41710187	41710269	+	9	-30.7	74.1	-0.146512195	13	0.033248082	0.579819277	-3.3274	1	40	active	0.933175874	True
Bos_taurus	tRNA-Leu-AAG-3-1	chr23	31571137	31571219	-	9	-26.8	63.4	-0.057146341	3	0.015345269	0	-0.22375	0	36	inactive	-0.781076308	True
Bos_taurus	tRNA-Leu-CAA-1-1	chr23	29926523	29926629	+	8	-41.6	78.1	1.182880952	6	0.042183623	0.81981982	-2.73465	1	22	active	0.987506765	True
Bos_taurus	tRNA-Leu-CAA-2-1	chr7	44000016	44000122	+	8	-38.5	75.6	0.873321429	6	0.060794045	0.667429443	-2.25675	1	35	active	0.983900503	True
Bos_taurus	tRNA-Leu-CAA-2-2	chr23	30848490	30848597	+	8	-40.3	75.6	0.658916667	8	0.033457249	0.495049505	-2.55715	4	7	active	0.982070501	True
Bos_taurus	tRNA-Leu-CAA-2-3	chr23	30852305	30852413	-	8	-39.7	75.5	0.381154762	8	0.013613861	0.311609687	-1.1265	5	7	inactive	-0.589262637	True
Bos_taurus	tRNA-Leu-CAA-3-1	chr23	29897374	29897485	-	8	-42.7	74.7	0.66727381	3	0.044389642	0.696570729	-2.2605	4	25	active	0.983745159	True
Bos_taurus	tRNA-Leu-CAA-4-1	chr23	30867359	30867466	+	8	-40.2	78.3	0.114916667	8	0.038413879	0.635901163	-1.41335	4	5	active	0.961712986	True
Bos_taurus	tRNA-Leu-CAA-5-1	chr9	42539836	42539918	+	8	-24.1	64.6	0.039878049	351	0.007672634	0.161030596	-0.4145	0	9	inactive	-0.939059093	True
Bos_taurus	tRNA-Leu-CAA-6-1	chr2	35207438	35207520	-	8	-25.7	60.2	0.038621951	351	0.008951407	0.097847358	-0.315	0	12	inactive	-0.914306842	True
Bos_taurus	tRNA-Leu-CAG-1-1	chr3	8102946	8103029	+	5	-35.7	78.2	0.325879518	8	0.125159642	0.945857795	-0.0721	8	10	active	0.71345851	True
Bos_taurus	tRNA-Leu-CAG-1-2	chr3	8114071	8114154	-	5	-35.7	78.2	0.336277108	8	0.121328225	0.945261635	-0.13105	6	4	active	0.788923216	True
Bos_taurus	tRNA-Leu-CAG-1-3	chr23	31339943	31340026	-	5	-35.7	78.2	1.327746988	9	0.039591315	1.008381351	-4.446	3	54	active	0.983384884	True
Bos_taurus	tRNA-Leu-CAG-2-1	chr3	8021636	8021719	+	5	-32.8	77.3	1.011349398	8	0.037037037	0.639756283	-4.2433	3	15	active	0.986167364	True
Bos_taurus	tRNA-Leu-CAG-2-2	chr18	25388949	25389032	+	5	-32.8	77.3	1.099168675	10	0.040868455	0.677486599	-2.17875	0	22	active	0.983697231	True
Bos_taurus	tRNA-Leu-TAA-1-1	chr9	82695969	82696052	+	6	-32.3	88.1	1.29526506	6	0.095785441	1.058620193	-0.9402	0	7	active	0.944909062	True
Bos_taurus	tRNA-Leu-TAA-2-1	chr23	31053523	31053606	-	6	-31.4	86.5	0.085373494	7	0.029374202	0.661145016	-0.26055	3	24	active	0.886051452	True
Bos_taurus	tRNA-Leu-TAA-3-1	chr23	31079926	31080009	+	6	-28.8	80.6	0.303891566	7	0.019157088	0.537909836	-1.3884	2	19	active	0.928259242	True
Bos_taurus	tRNA-Leu-TAA-4-1	chr15	84096212	84096295	+	6	-27.9	80.8	0.090493976	13	0.03192848	0.547575025	-3.39165	5	31	active	0.979715184	True
Bos_taurus	tRNA-Leu-TAA-5-1	chr23	30791697	30791780	+	6	-33.5	89.4	0.622421687	7	0.01660281	0.270531401	-2.13725	4	29	active	0.659235627	True
Bos_taurus	tRNA-Leu-TAA-6-1	chr18	38977397	38977478	-	6	-19.6	60.9	-0.000246914	7	0.007682458	0.168350168	0.0321	0	0	inactive	-0.901734168	True
Bos_taurus	tRNA-Leu-TAG-1-1	chr10	26469787	26469869	+	4	-32.4	76.2	0.043829268	3	0.033248082	0.558213716	-2.198	4	18	active	0.926879577	True
Bos_taurus	tRNA-Leu-TAG-2-1	chr19	28373767	28373849	-	4	-33.3	75.2	1.581914634	8	0.033248082	0.542355372	-2.7504	4	102	active	0.987263054	True
Bos_taurus	tRNA-Leu-TAG-3-1	chr25	20082378	20082460	-	4	-30.8	73.9	1.484756098	17	0.04859335	1.062091503	-3.6541	0	55	active	0.979926159	True
Bos_taurus	tRNA-Leu-TAG-4-1	chr10	26504464	26504546	-	4	-29.2	74.1	0.900890244	8	0.02685422	0.716679077	-3.4668	3	19	active	0.985780673	True
Bos_taurus	tRNA-Lys-CTT-1-1	chr3	21395380	21395453	+	28	-28	87.8	1.089712329	8	0.053040103	0.940438871	-3.8004	3	0	active	0.903224657	True
Bos_taurus	tRNA-Lys-CTT-1-10	chr25	2613400	2613473	+	28	-28	87.8	0.276410959	10	0.040103493	0.637871332	-0.98255	13	43	active	0.845337493	True
Bos_taurus	tRNA-Lys-CTT-1-11	chr25	2618369	2618442	+	28	-28	87.8	-0.162876712	3	0.038809832	0.575435203	-1.07875	16	43	active	0.834305462	False
Bos_taurus	tRNA-Lys-CTT-1-12	chr25	2621234	2621307	+	28	-28	87.8	-0.139383562	3	0.042690815	0.597439545	-1.0137	16	45	active	0.838305462	False
Bos_taurus	tRNA-Lys-CTT-1-13	chr25	2623855	2623928	+	28	-28	87.8	-0.139383562	3	0.032341527	0.522165388	-1.0137	15	47	active	0.802089589	True
Bos_taurus	tRNA-Lys-CTT-1-14	chr25	2630203	2630276	+	28	-28	87.8	-0.852708333	2	0.032341527	0.315031503	-1.129	12	48	active	0.631362709	True
Bos_taurus	tRNA-Lys-CTT-1-15	chr25	2635163	2635236	+	28	-28	87.8	0.122150685	6	0.025873221	0.502032034	-1.51525	6	45	active	0.905041085	True
Bos_taurus	tRNA-Lys-CTT-1-2	chr7	41736290	41736363	+	28	-28	87.8	1.089424658	9	0.031047865	0.660150892	-2.65575	2	38	active	0.913979847	True
Bos_taurus	tRNA-Lys-CTT-1-3	chr7	41748396	41748469	-	28	-28	87.8	0.233191781	8	0.03622251	0.47879617	-3.69925	2	37	active	0.904296643	True
Bos_taurus	tRNA-Lys-CTT-1-4	chr23	31310407	31310480	-	28	-28	87.8	0.959657534	9	0.03622251	0.492957746	-4.5671	4	45	active	0.932954788	True
Bos_taurus	tRNA-Lys-CTT-1-5	chr25	2593043	2593116	-	28	-28	87.8	0.492178082	4	0.046571798	0.779352227	-4.13155	6	43	active	0.939691686	True
Bos_taurus	tRNA-Lys-CTT-1-6	chr25	2597596	2597669	-	28	-28	87.8	0.344849315	3	0.020698577	0.113636364	-1.192	6	39	active	0.595337996	True
Bos_taurus	tRNA-Lys-CTT-1-7	chr25	2603761	2603834	+	28	-28	87.8	0.245849315	5	0.058214748	0.586316346	-2.5813	9	40	active	0.866320565	True
Bos_taurus	tRNA-Lys-CTT-1-8	chr25	2605206	2605279	-	28	-28	87.8	0.261273973	4	0.053040103	0.736002804	-1.76335	8	40	active	0.85764866	True
Bos_taurus	tRNA-Lys-CTT-1-9	chr25	2608819	2608892	+	28	-28	87.8	0.257958904	4	0.034928849	0.257400257	-2.182	9	41	active	0.736361797	True
Bos_taurus	tRNA-Lys-CTT-10-1	chr1	97965856	97965929	+	28	-25.4	65.2	0	130	0.006468305	0.185185185	-0.1171	0	26	inactive	-0.960896527	True
Bos_taurus	tRNA-Lys-CTT-11-1	chr4	32242282	32242355	+	28	-17.2	53.4	-0.015328767	110	0.003880983	0.305010893	0.02335	0	14	inactive	-0.954447127	True
Bos_taurus	tRNA-Lys-CTT-12-1	chr16	12668675	12668748	+	28	-19.1	58.9	0.057767123	95	0.002587322	0.14632107	-0.35085	0	23	inactive	-0.972630549	True
Bos_taurus	tRNA-Lys-CTT-13-1	chr19	17588946	17589020	+	28	-26	56.5	-0.019945946	61	0.006459948	0.123326286	0.08755	0	20	inactive	-0.955010144	True
Bos_taurus	tRNA-Lys-CTT-2-1	chr10	70793281	70793354	-	28	-30.1	88	1.277027397	9	0.028460543	0.578703704	-3.90065	0	39	active	0.91316893	True
Bos_taurus	tRNA-Lys-CTT-2-2	chr21	30797555	30797628	-	28	-30.1	88	0.348986301	77	0.028460543	0.929330065	-2.3836	0	21	active	0.873432436	True
Bos_taurus	tRNA-Lys-CTT-3-1	chr25	2625594	2625667	+	28	-25.5	79.8	-0.139383562	3	0.042690815	0.674311927	-0.9899	16	47	active	0.842459309	True
Bos_taurus	tRNA-Lys-CTT-4-1	chr4	75841391	75841464	-	28	-27.1	85.8	-0.013520548	187	0.006468305	0.054347826	0.03585	0	0	inactive	-0.792882536	True
Bos_taurus	tRNA-Lys-CTT-5-1	chr15	63431604	63431691	-	28	-26.2	65.1	0.018965517	4	0.007623888	0.249287749	0.04315	0	16	inactive	-0.882047649	True
Bos_taurus	tRNA-Lys-CTT-6-1	chr10	94199939	94200012	-	28	-28.6	69.1	-0.013780822	351	0.006468305	0.07772596	0.12295	0	0	inactive	-0.894799763	True
Bos_taurus	tRNA-Lys-CTT-7-1	chr27	29960005	29960078	-	28	-13.1	58.4	-0.032835616	3	0.009055627	0.335019828	0.04365	0	0	inactive	-0.859368072	True
Bos_taurus	tRNA-Lys-CTT-8-1	chr6	30502846	30502919	-	28	-16.5	64.1	0.073876712	328	0.010349288	0.22917758	-0.0585	0	0	inactive	-0.967285908	True
Bos_taurus	tRNA-Lys-CTT-9-1	chr7	41046570	41046643	-	28	-22.3	62.6	-0.035191781	114	0.005174644	0.165328295	0.13745	0	16	inactive	-0.960760461	True
Bos_taurus	tRNA-Lys-TTT-1-1	chr15	84100841	84100914	+	38	-27.5	87.8	0.937972603	7	0.023285899	0.339147287	-3.9003	6	35	active	0.804694111	True
Bos_taurus	tRNA-Lys-TTT-1-2	chr15	84102583	84102656	-	38	-27.5	87.8	1.230328767	3	0.099611902	0.820859488	-3.91995	6	37	active	0.931035748	True
Bos_taurus	tRNA-Lys-TTT-1-3	chr16	2058397	2058470	+	38	-27.5	87.8	0.440547945	8	0.033635188	0.657071339	-3.18625	1	50	active	0.924068627	True
Bos_taurus	tRNA-Lys-TTT-1-4	chr16	2058731	2058804	-	38	-27.5	87.8	1.344712329	7	0.055627426	1.190644933	-3.59955	1	50	active	0.946069812	True
Bos_taurus	tRNA-Lys-TTT-1-5	chr19	28372610	28372683	+	38	-27.5	87.8	1.608452055	5	0.042690815	0.82972583	-5.14535	4	102	active	0.963844691	True
Bos_taurus	tRNA-Lys-TTT-1-6	chr23	29889143	29889216	-	38	-27.5	87.8	0.226767123	11	0.021992238	0.094594595	-2.0187	5	26	active	0.704007014	True
Bos_taurus	tRNA-Lys-TTT-1-7	chr23	30021492	30021565	+	38	-27.5	87.8	-0.773136986	9	0.021992238	0.535714286	-3.22685	6	5	active	0.822418862	True
Bos_taurus	tRNA-Lys-TTT-1-8	chr23	30819859	30819932	+	38	-27.5	87.8	0.079712329	6	0.037516171	0.54908113	-0.4702	6	20	active	0.804081121	True
Bos_taurus	tRNA-Lys-TTT-10-1	chr12	35096694	35096767	-	38	-28	84.9	-0.187876712	56	0.006468305	0.132575758	-0.3476	0	0	inactive	-0.723917357	True
Bos_taurus	tRNA-Lys-TTT-10-2	chrX	107099646	107099719	-	38	-28	84.9	0	217	0.007761966	0.234113712	0.1407	0	3	inactive	-0.798135457	True
Bos_taurus	tRNA-Lys-TTT-11-1	chr10	93996239	93996312	-	38	-29.6	69	0.123890411	40	0.01164295	0.173611111	-0.521	0	12	inactive	-0.860665962	True
Bos_taurus	tRNA-Lys-TTT-12-1	chr16	10310596	10310669	-	38	-20	73.9	0.10130137	200	0.001293661	0	0.01365	0	0	inactive	-0.928189374	True
Bos_taurus	tRNA-Lys-TTT-13-1	chr5	19220443	19220516	+	38	-16.8	68.7	0.101506849	221	0.003880983	0.074515648	0.12245	0	7	inactive	-0.951535598	True
Bos_taurus	tRNA-Lys-TTT-14-1	chr1	126326765	126326838	-	38	-19.6	65.2	0.057863014	52	0.014230272	0.310903842	-0.148	0	4	inactive	-0.924962133	True
Bos_taurus	tRNA-Lys-TTT-15-1	chr5	87665268	87665341	-	38	-25.1	72.3	0.05909589	351	0.012936611	0.345849802	-0.333	0	0	inactive	-0.904877802	True
Bos_taurus	tRNA-Lys-TTT-16-1	chr13	77205866	77205939	-	38	-20.4	74.1	0.05769863	123	0.01164295	0.538461538	-0.14515	0	0	inactive	-0.619526546	True
Bos_taurus	tRNA-Lys-TTT-17-1	chr1	61495443	61495516	-	38	-23.8	62.3	0.101287671	351	0.01164295	0.271493213	-0.22935	0	0	inactive	-0.920848247	True
Bos_taurus	tRNA-Lys-TTT-18-1	chr24	12712721	12712794	-	38	-24.2	67.9	0.029726027	6	0.015523933	0.481904013	-0.11165	0	23	inactive	-0.550464652	True
Bos_taurus	tRNA-Lys-TTT-19-1	chr19	17401125	17401197	-	38	-19.7	66.3	0.014638889	92	0.007772021	0.228087325	-0.0006	0	1	inactive	-0.947713639	True
Bos_taurus	tRNA-Lys-TTT-2-1	chr23	29970288	29970361	-	38	-26	86.8	-0.177013699	14	0.007761966	0.077691454	-1.555	4	14	inactive	-0.66439791	True
Bos_taurus	tRNA-Lys-TTT-2-2	chr23	30857472	30857545	+	38	-26	86.8	0.221561644	16	0.016817594	0.384615385	-1.3637	6	7	inactive	-0.524028895	True
Bos_taurus	tRNA-Lys-TTT-2-3	chr23	30860751	30860824	-	38	-26	86.8	0.138630137	10	0.009055627	0.296296296	-1.8008	5	7	inactive	-0.659301126	True
Bos_taurus	tRNA-Lys-TTT-20-1	chr6	74265896	74265969	-	38	-15.7	64.6	-0.169082192	139	0.002587322	0.081395349	-0.06415	0	3	inactive	-0.911682479	True
Bos_taurus	tRNA-Lys-TTT-21-1	chr17	59377772	59377844	-	38	-19.1	55.6	0.079347222	266	0.010362694	0.249598859	-0.05845	0	41	inactive	-0.960699041	True
Bos_taurus	tRNA-Lys-TTT-22-1	chr21	58373890	58373963	-	38	-20.2	61.3	0.057835616	218	0.012936611	0	-0.01155	0	22	inactive	-0.962231385	True
Bos_taurus	tRNA-Lys-TTT-23-1	chr4	106326647	106326720	-	38	-20.6	53.5	-0.05360274	59	0.007761966	0	-0.2224	0	55	inactive	-0.954065148	True
Bos_taurus	tRNA-Lys-TTT-24-1	chr4	92385174	92385246	-	38	-12.3	55.3	-0.038513889	285	0.007772021	0.355041591	-0.2683	0	10	inactive	-0.94202395	True
Bos_taurus	tRNA-Lys-TTT-25-1	chr19	23775663	23775736	-	38	-20.2	57.9	-0.012972603	135	0.009055627	0.374531835	0.13415	0	7	inactive	-0.894911946	True
Bos_taurus	tRNA-Lys-TTT-26-1	chr24	1997467	1997540	+	38	-22.2	53.9	-0.04269863	351	0.042690815	0.238527942	-0.4496	0	0	inactive	-0.702377997	True
Bos_taurus	tRNA-Lys-TTT-27-1	chr18	56413031	56413104	+	38	-19.8	53.5	0.054493151	190	0.016817594	0.356506239	-0.1724	0	110	inactive	-0.903113502	True
Bos_taurus	tRNA-Lys-TTT-28-1	chr20	10156121	10156194	+	38	-16.6	56.2	-0.145465753	351	0.009055627	0.16252612	-0.64965	0	43	inactive	-0.95130702	True
Bos_taurus	tRNA-Lys-TTT-3-1	chr23	31034683	31034756	+	38	-28	85.2	0.375287671	38	0.007761966	0.179487179	-3.3119	1	27	inactive	-0.617331451	True
Bos_taurus	tRNA-Lys-TTT-4-1	chr23	30065854	30065927	-	38	-26	80.3	-0.150835616	13	0.005174644	0.108124807	0.01835	1	12	inactive	-0.834235512	True
Bos_taurus	tRNA-Lys-TTT-5-1	chr23	31314323	31314396	+	38	-23.1	77.7	0.540890411	6	0.019404916	0.727650728	-1.75605	4	47	active	0.832915515	True
Bos_taurus	tRNA-Lys-TTT-6-1	chr3	32810215	32810288	+	38	-28	87.4	0.113917808	13	0.002587322	0	-0.28075	0	2	inactive	-0.747278897	True
Bos_taurus	tRNA-Lys-TTT-7-1	chr17	14766724	14766797	+	38	-26.8	87.4	-0.133369863	19	0.012936611	0.518518519	-0.16705	0	2	active	0.563980994	True
Bos_taurus	tRNA-Lys-TTT-8-1	chr7	19902114	19902187	+	38	-24.1	81.3	?	351	0.010349288	0.486111111	?	0	77	inactive	-0.597078949	True
Bos_taurus	tRNA-Lys-TTT-9-1	chr1	113753401	113753474	+	38	-28	83.9	-0.048287671	154	0	0	-0.09135	0	0	inactive	-0.78787035	True
Bos_taurus	tRNA-Met-CAT-1-1	chr23	31188817	31188890	+	32	-24	76.5	-0.022534247	6	0.023285899	0.603864734	-3.95825	6	10	active	0.80689462	True
Bos_taurus	tRNA-Met-CAT-10-1	chr9	46787931	46788004	-	32	-20.6	57.6	-0.01369863	8	0.002587322	0	-0.45875	0	2	inactive	-0.947756016	True
Bos_taurus	tRNA-Met-CAT-11-1	chr25	28699728	28699801	+	32	-15.4	54.7	-0.025739726	8	0.006468305	0.095238095	0.0427	0	19	inactive	-0.948434347	True
Bos_taurus	tRNA-Met-CAT-12-1	chr5	113151740	113151813	+	32	-13.5	65.2	-0.152068493	69	0.009055627	0.243258271	0.0955	0	46	inactive	-0.899685704	True
Bos_taurus	tRNA-Met-CAT-13-1	chr13	65353733	65353806	+	32	-18.4	55.6	0.014178082	351	0.010349288	0.214559387	0.07875	0	51	inactive	-0.970705959	True
Bos_taurus	tRNA-Met-CAT-2-1	chr14	18213939	18214012	+	32	-25	82.3	0.98830137	6	0.069857697	0.851384223	-2.30275	0	41	active	0.92852157	True
Bos_taurus	tRNA-Met-CAT-3-1	chr23	29886133	29886206	+	32	-25.8	77.4	1.039273973	6	0.021992238	0.737547893	-3.20575	3	26	active	0.872791393	True
Bos_taurus	tRNA-Met-CAT-3-2	chr23	29891395	29891468	-	32	-25.8	77.4	1.10109589	8	0.028460543	0.579644685	-2.57815	5	25	active	0.903699506	True
Bos_taurus	tRNA-Met-CAT-3-3	chr23	30771293	30771366	-	32	-25.8	77.4	0.123958904	4	0.019404916	0.285947712	-0.5252	2	33	inactive	-0.592376907	True
Bos_taurus	tRNA-Met-CAT-4-1	chr23	31184101	31184174	+	32	-26.7	77.9	-0.03309589	8	0.01164295	0.225806452	-4.0707	8	11	inactive	-0.685378443	True
Bos_taurus	tRNA-Met-CAT-5-1	chr1	95177691	95177764	-	32	-24.3	77.5	-0.434232877	6	0.019404916	0.378460208	-2.39225	4	18	active	0.599816333	True
Bos_taurus	tRNA-Met-CAT-6-1	chr18	39783680	39783753	-	32	-24	81.2	0.647506849	5	0.068564036	0.902061856	-1.5825	0	33	active	0.918627666	True
Bos_taurus	tRNA-Met-CAT-6-2	chr23	31192780	31192853	-	32	-24	81.2	0.415575342	3	0.028460543	0.248756219	-3.28755	6	9	active	0.746565477	True
Bos_taurus	tRNA-Met-CAT-7-1	chr14	20088184	20088257	-	32	-25.9	75.1	0.256452055	6	0.012936611	0.462875496	-1.15155	0	0	inactive	-0.541448587	True
Bos_taurus	tRNA-Met-CAT-8-1	chr23	31173160	31173233	+	32	-26.7	79.8	-0.089684932	9	0.012936611	0.287828947	-4.008	4	10	inactive	-0.597119616	True
Bos_taurus	tRNA-Met-CAT-9-1	chr23	31177169	31177242	+	32	-19.8	69.5	-0.080767123	4	0.012936611	0	-4.17745	6	11	inactive	-0.639556165	True
Bos_taurus	tRNA-Phe-AAA-1-1	chr20	48744375	48744448	+	1	-11.2	61.5	-0.041027397	351	0	0	-0.14275	0	0	inactive	-0.932645343	True
Bos_taurus	tRNA-Phe-GAA-1-1	chr7	45426778	45426851	-	22	-21.9	88.9	0.465684932	4	0.072445019	1.07725454	-0.8286	1	77	active	0.962510899	True
Bos_taurus	tRNA-Phe-GAA-1-2	chr12	69597552	69597625	-	22	-21.9	88.9	1.068643836	9	0.067270375	0.890346767	-2.6285	0	30	active	0.988374826	True
Bos_taurus	tRNA-Phe-GAA-1-3	chr17	53130611	53130684	+	22	-21.9	88.9	1.247041096	10	0.04915912	0.537280702	-2.58765	4	35	active	0.989096681	True
Bos_taurus	tRNA-Phe-GAA-1-4	chr23	29874967	29875040	+	22	-21.9	88.9	0.551780822	13	0.021992238	0.629173087	-1.55835	2	26	active	0.962111745	True
Bos_taurus	tRNA-Phe-GAA-1-5	chr23	29959425	29959498	+	22	-21.9	88.9	0.242109589	6	0.025873221	0.562571757	-2.02745	2	14	active	0.974205369	True
Bos_taurus	tRNA-Phe-GAA-1-6	chr23	29988372	29988445	+	22	-21.9	88.9	-0.07869863	9	0.020698577	0.270200721	-2.067166667	4	11	active	0.677464505	True
Bos_taurus	tRNA-Phe-GAA-10-1	chrX	132031449	132031524	+	22	-20.2	62	?	7	0.033548387	0.561797753	?	6	23	active	0.945571806	True
Bos_taurus	tRNA-Phe-GAA-2-1	chr15	84101756	84101829	-	22	-21.9	87.9	1.203493151	4	0.06080207	0.987654321	-3.04465	6	35	active	0.98872901	True
Bos_taurus	tRNA-Phe-GAA-2-2	chr15	84107177	84107250	-	22	-21.9	87.9	0.256958904	4	0.034928849	0.463855422	-3.82155	3	42	active	0.986042689	True
Bos_taurus	tRNA-Phe-GAA-2-3	chr23	30006509	30006582	-	22	-21.9	87.9	-0.180626866	8	0.01164295	0.072765073	-2.1565625	4	2	inactive	-0.570966483	True
Bos_taurus	tRNA-Phe-GAA-2-4	chr23	30016597	30016670	+	22	-21.9	87.9	-0.073452055	8	0.014230272	0.160734788	-1.91675	5	5	inactive	-0.589139412	True
Bos_taurus	tRNA-Phe-GAA-2-5	chr23	30822324	30822397	-	22	-21.9	87.9	0.325970149	4	0.016817594	0.37037037	-1.88395	5	20	active	0.651103072	True
Bos_taurus	tRNA-Phe-GAA-2-6	chr29	37782344	37782417	+	22	-21.9	87.9	0.123589041	4	0.01164295	0.204290092	0.1112	0	48	inactive	-0.779891065	True
Bos_taurus	tRNA-Phe-GAA-3-1	chrX	132029727	132029800	+	22	-24.4	87.6	-0.09609589	9	0.029754204	0.406976744	-0.0581	6	23	active	0.704941866	True
Bos_taurus	tRNA-Phe-GAA-3-2	chrX	132030970	132031043	+	22	-24.4	87.6	0.073273973	9	0.032341527	0.480769231	-0.23625	6	22	active	0.795015533	False
Bos_taurus	tRNA-Phe-GAA-3-3	chrX	132037210	132037283	+	22	-24.4	87.6	?	9	0.023285899	0.335708413	?	5	24	active	0.762794346	False
Bos_taurus	tRNA-Phe-GAA-4-1	chr15	83314391	83314464	+	22	-17.9	69.5	0.013493151	4	0.027166882	0.275851198	-0.11755	0	24	inactive	-0.63111745	True
Bos_taurus	tRNA-Phe-GAA-5-1	chr1	95195159	95195232	+	22	-17.7	72.6	-0.115931507	9	0.006468305	0.143207856	-0.20415	1	18	inactive	-0.884515732	True
Bos_taurus	tRNA-Phe-GAA-6-1	chr23	49828350	49828423	-	22	-19.4	72.1	-0.090479452	9	0.031047865	0.40902553	-0.62715	0	3	inactive	-0.521428184	True
Bos_taurus	tRNA-Phe-GAA-7-1	chr18	23943601	23943674	+	22	-17.4	72.3	-0.057986301	325	0.010349288	0.062233286	0.0434	0	30	inactive	-0.964611267	True
Bos_taurus	tRNA-Phe-GAA-8-1	chr13	17128536	17128609	+	22	-20.3	62.9	0.006452055	12	0.029754204	0.611620795	-0.67405	0	24	active	0.695155391	True
Bos_taurus	tRNA-Phe-GAA-9-1	chrX	132036503	132036581	+	22	-21.8	58.2	-0.083820513	233	0.019280206	0.414341282	-0.25815	5	24	inactive	-0.611302388	True
Bos_taurus	tRNA-Pro-AGG-1-1	chr4	93567898	93567970	+	12	-29.5	70.2	1.385194444	2	0.012953368	0.126103405	-1.452	0	91	inactive	-0.586584888	True
Bos_taurus	tRNA-Pro-AGG-1-10	chr25	2623052	2623124	+	12	-29.5	70.2	0.529541667	3	0.080310881	0.95580309	-4.432	15	45	active	0.934729527	True
Bos_taurus	tRNA-Pro-AGG-1-11	chr25	2627826	2627898	+	12	-29.5	70.2	0.524652778	2	0.062176166	0.823917137	-4.054578947	15	48	active	0.936686196	True
Bos_taurus	tRNA-Pro-AGG-1-12	chr25	2630820	2630892	+	12	-29.5	70.2	0.535180556	11	0.033678756	0.396825397	-4.49855	11	48	active	0.917833891	True
Bos_taurus	tRNA-Pro-AGG-1-2	chr10	26514781	26514853	+	12	-29.5	70.2	1.283236111	48	0.053108808	0.777000777	-4.5676	3	17	active	0.969479366	True
Bos_taurus	tRNA-Pro-AGG-1-3	chr10	26517521	26517593	+	12	-29.5	70.2	0.932916667	3	0.029792746	0.887423935	-3.72695	3	17	active	0.986069645	True
Bos_taurus	tRNA-Pro-AGG-1-4	chr15	56432204	56432276	+	12	-29.5	70.2	1.382833333	351	0.059585492	0.866666667	-4.95545	0	14	active	0.843576579	True
Bos_taurus	tRNA-Pro-AGG-1-5	chr23	31311727	31311799	-	12	-29.5	70.2	1.392569444	3	0.019430052	0.607243548	-1.9689	4	47	active	0.955379291	True
Bos_taurus	tRNA-Pro-AGG-1-6	chr25	2596988	2597060	+	12	-29.5	70.2	0.133541667	3	0.03238342	0.353964401	-0.98285	6	39	active	0.840388877	True
Bos_taurus	tRNA-Pro-AGG-1-7	chr25	2600905	2600977	-	12	-29.5	70.2	0.217041667	3	0.064766839	0.566801619	-1.56845	8	40	active	0.922886425	True
Bos_taurus	tRNA-Pro-AGG-1-8	chr25	2617868	2617940	+	12	-29.5	70.2	0.535180556	3	0.07642487	0.883095038	-4.071368421	16	42	active	0.934729527	True
Bos_taurus	tRNA-Pro-AGG-1-9	chr25	2620735	2620807	+	12	-29.5	70.2	0.529541667	3	0.071243523	0.953840913	-4.1958	15	45	active	0.936686196	True
Bos_taurus	tRNA-Pro-CGG-1-1	chr3	1051358	1051430	-	4	-29.5	70.2	1.170069444	3	0.07642487	0.824196041	-0.9093	0	9	active	0.967529014	True
Bos_taurus	tRNA-Pro-CGG-1-2	chr19	28461074	28461146	-	4	-29.5	70.2	1.407611111	10	0.053108808	0.645280236	-2.96635	6	117	active	0.985525676	True
Bos_taurus	tRNA-Pro-CGG-1-3	chr23	31138814	31138886	-	4	-29.5	70.2	0.680458333	6	0.029792746	0.10951189	-2.54725	2	21	active	0.923346797	True
Bos_taurus	tRNA-Pro-CGG-1-4	chr25	2610090	2610162	+	4	-29.5	70.2	0.374305556	27	0.049222798	0.455729167	-1.5357	10	43	active	0.928567109	True
Bos_taurus	tRNA-Pro-TGG-1-1	chr10	26499192	26499264	-	8	-29.5	74.9	0.344305556	10	0.033678756	0.378436824	-3.5144	2	20	active	0.952365598	True
Bos_taurus	tRNA-Pro-TGG-2-1	chr10	26446038	26446110	-	8	-29.5	70.3	1.43225	6	0.045336788	0.514075887	-3.6336	2	16	active	0.988144968	True
Bos_taurus	tRNA-Pro-TGG-2-2	chr25	2594063	2594135	+	8	-29.5	70.3	0.839166667	4	0.075129534	0.645624103	-5.02145	7	41	active	0.987304033	True
Bos_taurus	tRNA-Pro-TGG-2-3	chr25	2617012	2617084	+	8	-29.5	70.3	0.134722222	5	0.075129534	0.436191426	-1.459526316	15	40	active	0.904832711	True
Bos_taurus	tRNA-Pro-TGG-2-4	chr25	2619613	2619685	+	8	-29.5	70.3	0.132319444	4	0.049222798	0.565558633	-1.4052	15	44	active	0.929185567	True
Bos_taurus	tRNA-Pro-TGG-2-5	chr25	2622196	2622268	+	8	-29.5	70.3	0.134722222	4	0.073834197	0.60206422	-1.2424	16	45	active	0.913772618	True
Bos_taurus	tRNA-Pro-TGG-2-6	chr25	2625089	2625161	+	8	-29.5	70.3	0.529541667	3	0.059585492	0.630144033	-2.8431	15	47	active	0.940786588	True
Bos_taurus	tRNA-Pro-TGG-2-7	chr25	2626484	2626556	+	8	-29.5	70.3	0.134722222	5	0.059585492	0.712074303	-1.3481	16	48	active	0.913347356	True
Bos_taurus	tRNA-SeC-TCA-1-1	chr18	53510970	53511057	-	9	-37.1	146.9	1.417287356	12	0.038119441	0.978494624	-4.7154	0	70	active	0.985610492	True
Bos_taurus	tRNA-Ser-ACT-1-1	chr12	18185807	18185880	-	1	-16.1	52.2	0.031383562	132	0.015523933	0.348883573	0.0622	0	25	inactive	-0.872239841	True
Bos_taurus	tRNA-Ser-AGA-1-1	chr19	49814791	49814873	-	12	-32.8	90.3	0.124	351	0.028132992	0.256081946	-0.3855	0	23	active	0.581578876	True
Bos_taurus	tRNA-Ser-AGA-1-2	chr23	30889990	30890072	+	12	-32.8	90.3	0.799695122	213	0.02685422	0.449458815	-3.149	5	7	active	0.868078504	True
Bos_taurus	tRNA-Ser-AGA-2-1	chr14	71396253	71396335	+	12	-32.8	89.6	1.419304878	11	0.065217391	0.830827663	-0.74335	0	10	active	0.967015133	True
Bos_taurus	tRNA-Ser-AGA-2-2	chr19	28464916	28464998	-	12	-32.8	89.6	1.367682927	6	0.049872123	0.77978424	-4.99735	6	119	active	0.987639337	True
Bos_taurus	tRNA-Ser-AGA-2-3	chr23	30879010	30879092	+	12	-32.8	89.6	0.695646341	7	0.037084399	0.355742704	-1.64595	3	2	active	0.926986701	True
Bos_taurus	tRNA-Ser-AGA-2-4	chr23	30895484	30895566	-	12	-32.8	89.6	0.822804878	40	0.010230179	0	-3.7277	4	8	active	0.575184491	True
Bos_taurus	tRNA-Ser-AGA-2-5	chr23	30899984	30900066	-	12	-32.8	89.6	0.79895122	175	0.035805627	0.791529605	-3.746684211	8	10	active	0.835670091	True
Bos_taurus	tRNA-Ser-AGA-2-6	chr23	30941236	30941318	-	12	-32.8	89.6	0.527	10	0.037084399	0.455465587	-2.3262	3	14	active	0.983415271	True
Bos_taurus	tRNA-Ser-AGA-2-7	chr23	30953174	30953256	-	12	-32.8	89.6	0.691134146	65	0.031969309	0.384615385	-2.97935	1	14	active	0.92729109	True
Bos_taurus	tRNA-Ser-AGA-2-8	chr23	31438771	31438853	-	12	-32.8	89.6	0.938609756	6	0.023017903	0.232095491	-2.47945	8	46	active	0.876163702	True
Bos_taurus	tRNA-Ser-AGA-3-1	chr23	30944725	30944807	-	12	-32.8	89	0.647597561	13	0.028132992	0.388403385	-1.6332	4	14	active	0.943872437	True
Bos_taurus	tRNA-Ser-AGA-4-1	chr18	35509928	35510010	+	12	-31.9	83.6	0.060646341	73	0.015345269	0.211736237	-0.3999	0	133	inactive	-0.676685164	True
Bos_taurus	tRNA-Ser-CGA-1-1	chr19	28389026	28389108	-	5	-34	95.1	1.527634146	7	0.038363171	0.6740682	-0.8274	2	103	active	0.983043407	True
Bos_taurus	tRNA-Ser-CGA-2-1	chr23	31087476	31087558	-	5	-34	94	0.624280488	39	0.034526854	0.483902824	-1.7533	3	19	active	0.975488435	True
Bos_taurus	tRNA-Ser-CGA-3-1	chr5	57464638	57464720	-	5	-29.8	89.6	1.578341463	5	0.042199488	0.489253888	-0.71655	0	160	active	0.967861626	True
Bos_taurus	tRNA-Ser-CGA-4-1	chr23	30817790	30817872	+	5	-34	94.1	0.664	6	0.025575448	0.383351588	-1.53045	6	20	active	0.954337584	True
Bos_taurus	tRNA-Ser-CGA-5-1	chr23	28678315	28678397	+	5	-17.8	64.3	0.026695122	173	0.008951407	0.08291874	-0.07265	0	62	inactive	-0.92231975	True
Bos_taurus	tRNA-Ser-GCT-1-1	chr23	30052390	30052472	+	17	-32.8	91.9	0.871085366	130	0.014066496	0.237341772	-1.6519	4	12	active	0.527700667	True
Bos_taurus	tRNA-Ser-GCT-2-1	chr29	45045824	45045906	+	17	-30.7	89.1	1.621317073	6	0.05370844	0.74537037	-2.67365	0	65	active	0.988292792	True
Bos_taurus	tRNA-Ser-GCT-3-1	chr10	36292322	36292404	-	17	-30.7	88.4	1.546719512	8	0.047314578	0.828598485	-1.19325	0	38	active	0.983203031	True
Bos_taurus	tRNA-Ser-GCT-3-2	chr19	28442023	28442105	+	17	-30.7	88.4	1.567987805	27	0.079283887	0.957264957	-3.9787	3	113	active	0.986496188	True
Bos_taurus	tRNA-Ser-GCT-3-3	chr23	30229758	30229840	-	17	-30.7	88.4	0.864439024	31	0.037084399	0.68627451	-1.863842105	0	40	active	0.980507767	True
Bos_taurus	tRNA-Ser-GCT-3-4	chr23	30920352	30920434	+	17	-30.7	88.4	0.12395122	125	0.039641944	0.644932672	-0.3232	12	11	active	0.758478938	False
Bos_taurus	tRNA-Ser-GCT-3-5	chr23	30921332	30921414	+	17	-30.7	88.4	0.12395122	124	0.043478261	0.644932672	-0.3232	11	11	active	0.754478938	False
Bos_taurus	tRNA-Ser-GCT-3-6	chr23	30922542	30922624	+	17	-30.7	88.4	0.104365854	111	0.024296675	0.540123457	-0.2996	10	12	active	0.752435095	True
Bos_taurus	tRNA-Ser-GCT-3-7	chr23	30925028	30925110	-	17	-30.7	88.4	0.079719512	27	0.025575448	0.540123457	-0.29765	8	12	active	0.766709829	True
Bos_taurus	tRNA-Ser-GCT-3-8	chr23	30925657	30925739	-	17	-30.7	88.4	?	124	0.035805627	1.004922067	?	8	12	active	0.822664782	False
Bos_taurus	tRNA-Ser-GCT-3-9	chr23	31451240	31451322	+	17	-30.7	88.4	1.368487805	34	0.029411765	0.125448029	-4.3789	9	39	active	0.862580915	True
Bos_taurus	tRNA-Ser-GCT-4-1	chr23	31147418	31147500	-	17	-30.1	91.7	0.629402439	9	0.035805627	0.614035088	-2.53855	2	12	active	0.986648444	True
Bos_taurus	tRNA-Ser-GCT-5-1	chr23	31131603	31131685	-	17	-30.1	91	0.638926829	8	0.037084399	0.765306122	-2.60855	1	20	active	0.987092174	True
Bos_taurus	tRNA-Ser-GCT-6-1	chr13	78762056	78762138	-	17	-28.1	84.9	0.101158537	55	0.04859335	0.67394095	-0.4675	0	26	active	0.90015423	True
Bos_taurus	tRNA-Ser-GCT-7-1	chr10	68137246	68137328	+	17	-30.7	84.1	0.104280488	28	0.02173913	0.196078431	-0.1675	0	18	active	0.611697794	True
Bos_taurus	tRNA-Ser-GCT-8-1	chr11	49898895	49898986	+	17	-21	54.2	0.019626374	351	0.007585335	0	-0.27745	0	3	inactive	-0.958742582	True
Bos_taurus	tRNA-Ser-GCT-9-1	chr20	55346943	55347026	-	17	-20.9	52.1	-0.082674699	124	0.022988506	0.446200918	-0.11725	0	6	inactive	-0.649823552	True
Bos_taurus	tRNA-Ser-GGA-1-1	chrX	14775795	14775877	+	15	-34.7	84.6	1.462963415	11	0.040920716	0.41322314	-0.777210526	0	3	active	0.931845477	True
Bos_taurus	tRNA-Ser-GGA-1-2	chrX	14857987	14858069	-	15	-34.7	84.6	1.457231707	11	0.040920716	0.419520548	-0.6393	0	3	active	0.887280414	True
Bos_taurus	tRNA-Ser-GGA-10-1	chr14	23060817	23060890	+	15	-15.3	59.6	0.013808219	141	0.014230272	0.194931774	-0.151	0	9	inactive	-0.953340585	True
Bos_taurus	tRNA-Ser-GGA-11-1	chr10	65659012	65659085	-	15	-13.9	58.1	?	182	0.019404916	0.373931624	-0.009083333	0	10	inactive	-0.718676493	True
Bos_taurus	tRNA-Ser-GGA-12-1	chr6	17196003	17196075	+	15	-18.3	62	0	167	0.00388601	0.137958218	-0.02645	0	3	inactive	-0.94707166	True
Bos_taurus	tRNA-Ser-GGA-2-1	chr1	105213671	105213744	+	15	-12.4	62.9	-0.02239726	132	0.007761966	0.073839662	0.0436	0	2	inactive	-0.949526117	True
Bos_taurus	tRNA-Ser-GGA-3-1	chr9	34936050	34936123	+	15	-13.9	63.2	0	239	0.012936611	0.284938942	-0.0216	0	21	inactive	-0.955616876	True
Bos_taurus	tRNA-Ser-GGA-3-2	chr11	70777895	70777968	+	15	-13.9	63.2	0	132	0.006468305	0.054721701	-0.1368	0	34	inactive	-0.958056949	True
Bos_taurus	tRNA-Ser-GGA-3-3	chr14	63577270	63577343	+	15	-13.9	63.2	0	351	0.009055627	0.091455448	0.028	0	18	inactive	-0.969751995	True
Bos_taurus	tRNA-Ser-GGA-4-1	chrX	94399998	94400070	-	15	-21.2	67.6	-0.089507692	214	0.007772021	0.140056022	-0.930684211	0	3	inactive	-0.953616625	True
Bos_taurus	tRNA-Ser-GGA-5-1	chr11	26300431	26300504	-	15	-13.9	62.2	?	351	0.010349288	0	?	0	25	inactive	-0.939960042	True
Bos_taurus	tRNA-Ser-GGA-6-1	chr2	105433776	105433848	+	15	-16.6	67.9	?	160	0.011658031	0.131975867	?	0	7	inactive	-0.919586345	True
Bos_taurus	tRNA-Ser-GGA-7-1	chr4	97863965	97864037	-	15	-20	65.8	?	198	0.009067358	0.220959596	-0.014153846	0	7	inactive	-0.920478385	True
Bos_taurus	tRNA-Ser-GGA-8-1	chr12	85926603	85926676	+	15	-13.9	59.3	?	351	0.009055627	0.404040404	?	0	0	inactive	-0.782088108	True
Bos_taurus	tRNA-Ser-GGA-9-1	chr21	58044558	58044630	-	15	-19.5	64.6	-0.025569444	275	0.010362694	0.335249042	-0.07595	0	26	inactive	-0.938443959	True
Bos_taurus	tRNA-Ser-TGA-1-1	chr23	30936699	30936781	+	4	-32.8	90.4	0.119414634	1	0.030690537	0.67865327	-2.6322	4	14	active	0.980469607	True
Bos_taurus	tRNA-Ser-TGA-2-1	chr23	31447801	31447883	+	4	-32.2	86.8	1.342646341	7	0.02173913	0.36505867	-3.507	11	41	active	0.914495511	True
Bos_taurus	tRNA-Ser-TGA-3-1	chr28	24365063	24365145	+	4	-34.9	94	1.525890244	19	0.044757033	0.79588015	-2.596	0	9	active	0.985234414	True
Bos_taurus	tRNA-Ser-TGA-4-1	chr23	30886855	30886937	-	4	-30.6	85	0.429731707	1	0.037084399	0.561167228	-3.2633	5	7	active	0.982346593	True
Bos_taurus	tRNA-Sup-CTA-1-1	chr6	18684079	18684151	-	5	-18.3	63	-0.077388889	227	0.012953368	0.254360465	0.1058	0	8	inactive	-0.930762098	True
Bos_taurus	tRNA-Sup-CTA-2-1	chr2	129011458	129011531	-	5	-21.1	60.9	0.057958904	351	0.014230272	0.218886804	-0.4117	0	18	inactive	-0.936526335	True
Bos_taurus	tRNA-Sup-CTA-3-1	chr8	61202158	61202229	-	5	-27.1	57	0.050478873	160	0.005188067	0.413711584	-0.13875	0	21	inactive	-0.706942981	True
Bos_taurus	tRNA-Sup-CTA-4-1	chr12	55658771	55658844	-	5	-19.4	54.8	-0.088958904	224	0.002587322	0.144032922	-0.04215	0	6	inactive	-0.941571158	True
Bos_taurus	tRNA-Sup-CTA-5-1	chr22	6078425	6078498	-	5	-28.9	53.5	0.05339726	202	0.005174644	0.069444444	0.1151	0	5	inactive	-0.814150847	True
Bos_taurus	tRNA-Sup-TCA-1-1	chr6	68630190	68630263	+	9	-29.4	66.6	-0.012684932	351	0.005174644	0.11697861	-0.1702	0	7	inactive	-0.815776867	True
Bos_taurus	tRNA-Sup-TCA-2-1	chr2	136013142	136013215	+	9	-24.5	65.5	-0.013424658	281	0.014230272	0.489282386	0.1187	0	16	inactive	-0.652249997	True
Bos_taurus	tRNA-Sup-TCA-3-1	chr10	54450520	54450592	-	9	-19.5	64.6	?	327	0.011658031	0.179487179	-1.423333333	0	14	inactive	-0.80646356	True
Bos_taurus	tRNA-Sup-TCA-4-1	chr18	35784358	35784431	+	9	-19.1	61.1	0.045315068	50	0.007761966	0.115074799	0.0922	0	74	inactive	-0.911691998	True
Bos_taurus	tRNA-Sup-TCA-5-1	chr13	23758011	23758084	+	9	-15.3	60.7	-0.06309589	351	0.015523933	0.204022151	-0.17635	0	28	inactive	-0.956736909	True
Bos_taurus	tRNA-Sup-TCA-6-1	chr21	56042923	56042993	-	9	-24.3	58.4	0.101071429	351	0.005194805	0.068159688	0.04285	0	59	inactive	-0.909249181	True
Bos_taurus	tRNA-Sup-TCA-7-1	chr11	104768364	104768435	+	9	-23.3	55	0.052901408	351	0.023346304	0.318603112	-0.54095	0	5	inactive	-0.708631375	True
Bos_taurus	tRNA-Sup-TCA-8-1	chr23	16666185	16666258	+	9	-24.7	53	0.027876712	35	0.023285899	0.166666667	-0.3547	0	113	inactive	-0.733220262	True
Bos_taurus	tRNA-Sup-TTA-1-1	chr14	50696151	50696222	+	2	-22.7	59.4	0.072408451	2	0.006485084	0.209371884	0.12385	0	0	inactive	-0.832672271	True
Bos_taurus	tRNA-Sup-TTA-2-1	chr9	83558710	83558783	+	2	-20.5	54.8	-0.101273973	155	0.001293661	0	-0.10775	0	0	inactive	-0.915273447	True
Bos_taurus	tRNA-Thr-AGT-1-1	chr23	29989146	29989220	-	12	-27	83.9	-0.157945946	36	0.023255814	0.907407407	-2.1284	4	11	active	0.897991232	True
Bos_taurus	tRNA-Thr-AGT-2-1	chr18	43765457	43765531	+	12	-27.3	82.6	1.552148649	21	0.063307494	0.795655469	-1.4794	0	24	active	0.983601557	True
Bos_taurus	tRNA-Thr-AGT-2-2	chr19	28442326	28442400	+	12	-27.3	82.6	0.669337838	16	0.055555556	0.91995221	-4.19605	3	113	active	0.987276857	True
Bos_taurus	tRNA-Thr-AGT-2-3	chr19	28464558	28464632	-	12	-27.3	82.6	1.315459459	22	0.0374677	0.826446281	-3.35	6	119	active	0.98814067	True
Bos_taurus	tRNA-Thr-AGT-3-1	chr23	30788237	30788311	-	12	-27.9	85.1	0.102081081	72	0.027131783	0.698341439	-0.47695	4	32	active	0.85659503	True
Bos_taurus	tRNA-Thr-AGT-4-1	chr23	30811605	30811679	+	12	-27	81.4	0.555337838	24	0.014211886	0.355113636	-2.934	7	22	active	0.679653836	True
Bos_taurus	tRNA-Thr-AGT-4-2	chr23	31335303	31335377	+	12	-27	81.4	1.525608108	7	0.031007752	0.556123028	-3.7631	3	51	active	0.98765615	True
Bos_taurus	tRNA-Thr-AGT-5-1	chr19	28389540	28389614	-	12	-27.3	80.1	1.275648649	161	0.032299742	0.293342912	-4.16405	1	101	active	0.816103817	True
Bos_taurus	tRNA-Thr-AGT-6-1	chr23	31100707	31100781	-	12	-27.8	80.6	1.389567568	11	0.018087855	0.600137174	-1.56615	3	19	active	0.906952432	True
Bos_taurus	tRNA-Thr-AGT-7-1	chr23	31061373	31061447	+	12	-27	82.9	0.346608108	12	0.015503876	0.304771856	-1.48635	4	23	active	0.52958896	False
Bos_taurus	tRNA-Thr-AGT-7-2	chr23	31061617	31061691	-	12	-27	82.9	0.305027027	12	0.016795866	0.361570248	-1.41655	4	23	active	0.600299469	False
Bos_taurus	tRNA-Thr-AGT-8-1	chr3	98543992	98544066	-	12	-24.7	77.2	0.031689189	198	0.010335917	0.249287749	-0.21595	0	21	inactive	-0.911131404	True
Bos_taurus	tRNA-Thr-CGT-1-1	chr1	95174818	95174892	+	5	-24	80	0.816851351	4	0.011627907	0.271791885	-3.26385	3	18	active	0.592460997	True
Bos_taurus	tRNA-Thr-CGT-2-1	chr23	30039696	30039770	+	5	-25.8	77.1	0.989716216	5	0.028423773	0.81043532	-3.14215	4	6	active	0.980418208	True
Bos_taurus	tRNA-Thr-CGT-3-1	chr25	13311911	13311983	+	5	-27	79.6	1.521875	33	0.102331606	1.060606061	-0.1092	0	27	active	0.931891896	True
Bos_taurus	tRNA-Thr-CGT-4-1	chr19	18834350	18834422	-	5	-27.3	78.3	1.100722222	77	0.113989637	0.951086957	0.609642857	0	25	active	0.921153722	True
Bos_taurus	tRNA-Thr-CGT-5-1	chr23	30842030	30842103	-	5	-28.4	77.2	0.653191781	11	0.02457956	0.576184379	-1.7258	2	12	active	0.96388262	True
Bos_taurus	tRNA-Thr-TGT-1-1	chr1	95186768	95186842	+	7	-26	83.6	0.257297297	5	0.027131783	0.775561887	-0.4811	3	17	active	0.885480678	True
Bos_taurus	tRNA-Thr-TGT-2-1	chr1	95112546	95112620	+	7	-24	82.9	0.171297297	1	0.019379845	0.381263617	-1.00155	2	14	active	0.705747956	True
Bos_taurus	tRNA-Thr-TGT-3-1	chr16	26708031	26708104	+	7	-29.1	84.1	0.454575342	17	0.042690815	0.638020833	-3.1541	0	23	active	0.986766069	True
Bos_taurus	tRNA-Thr-TGT-4-1	chr7	41715047	41715120	-	7	-29.7	78.8	1.460082192	8	0.063389392	0.755879059	-3.83925	1	40	active	0.988684242	True
Bos_taurus	tRNA-Thr-TGT-4-2	chr10	26500811	26500884	+	7	-29.7	78.8	0.320753425	43	0.029754204	0.641666667	-3.35635	2	19	active	0.963037901	True
Bos_taurus	tRNA-Thr-TGT-4-3	chr10	26514371	26514444	+	7	-29.7	78.8	1.281383562	9	0.038809832	0.409288339	-3.44185	4	17	active	0.98148121	True
Bos_taurus	tRNA-Thr-TGT-5-1	chr10	26448907	26448980	-	7	-30.4	78	1.389821918	20	0.02457956	0.349800114	-4.6811	2	16	active	0.956228046	True
Bos_taurus	tRNA-Trp-CCA-1-1	chr19	28441517	28441589	+	39	-25.1	73.3	1.523791667	8	0.082901554	0.655136268	-1.88365	3	113	active	0.950446586	True
Bos_taurus	tRNA-Trp-CCA-1-2	chr23	31435199	31435271	+	39	-25.1	73.3	1.251597222	4	0.029792746	0.588482556	-2.664	5	49	active	0.927724276	True
Bos_taurus	tRNA-Trp-CCA-1-3	chr23	31443962	31444034	+	39	-25.1	73.3	0.793291667	2	0.024611399	0.652680653	-2.632	11	41	active	0.857322544	True
Bos_taurus	tRNA-Trp-CCA-1-4	chr25	37482801	37482873	-	39	-25.1	73.3	0.440597015	6	0.029792746	0.387436004	-1.8224	0	67	active	0.750309273	True
Bos_taurus	tRNA-Trp-CCA-10-1	chr15	13476592	13476664	+	39	-18.9	62.3	0	172	0.005181347	0.097222222	-0.0503	0	0	inactive	-0.953421008	True
Bos_taurus	tRNA-Trp-CCA-11-1	chrX	70077682	70077754	-	39	-19.5	63.5	-0.009625	190	0.011658031	0.215570338	-0.3801	0	0	inactive	-0.965268095	True
Bos_taurus	tRNA-Trp-CCA-12-1	chr13	35645854	35645927	+	39	-23.3	58.5	-0.829058824	267	0.007761966	0.127087872	-1.38795	0	20	inactive	-0.918327486	True
Bos_taurus	tRNA-Trp-CCA-13-1	chr19	40463455	40463527	+	39	-21.5	63.7	0	211	0.007772021	0	0	0	30	inactive	-0.958694896	True
Bos_taurus	tRNA-Trp-CCA-14-1	chr17	36081082	36081154	-	39	-21.3	68.3	-0.001152778	351	0.010362694	0.13897161	0.01455	0	28	inactive	-0.965405475	True
Bos_taurus	tRNA-Trp-CCA-15-1	chr3	59153659	59153731	+	39	-19.7	67.8	0	300	0.009067358	0.120523416	-0.2238	0	35	inactive	-0.965683463	True
Bos_taurus	tRNA-Trp-CCA-16-1	chr17	47197854	47197927	+	39	-15	57.9	0.123726027	104	0.01164295	0.248638409	-0.52075	0	14	inactive	-0.937578516	True
Bos_taurus	tRNA-Trp-CCA-17-1	chr3	90311132	90311205	+	39	-16.8	67.3	0.101876712	326	0.010349288	0	-0.09125	0	4	inactive	-0.946904019	True
Bos_taurus	tRNA-Trp-CCA-18-1	chr5	89119347	89119419	-	39	-22.7	64	0.029527778	351	0.011658031	0.075757576	-0.1365	0	51	inactive	-0.963080645	True
Bos_taurus	tRNA-Trp-CCA-19-1	chr10	82753097	82753170	+	39	-16.7	57.7	0.008232877	168	0.012936611	0.348883573	-0.18365	0	12	inactive	-0.931339881	True
Bos_taurus	tRNA-Trp-CCA-2-1	chr19	34632349	34632421	-	39	-25.1	75.1	1.214402778	7	0.089378238	1.012882748	-2.2774	0	51	active	0.939391819	True
Bos_taurus	tRNA-Trp-CCA-20-1	chr29	28855894	28855966	+	39	-23.6	52.3	0.079791667	87	0.005181347	0.087456272	0.2373	0	47	inactive	-0.927857296	True
Bos_taurus	tRNA-Trp-CCA-21-1	chrX	63783020	63783093	-	39	-19.7	61.1	-0.044041096	86	0.002587322	0	0.10315	2	5	inactive	-0.939611412	True
Bos_taurus	tRNA-Trp-CCA-21-2	chrX	63792707	63792780	-	39	-19.7	61.1	-0.025835616	86	0.003880983	0.203252033	0	3	5	inactive	-0.895418841	True
Bos_taurus	tRNA-Trp-CCA-22-1	chr14	12003869	12003942	-	39	-20.3	50	0.058178082	117	0.009055627	0.116666667	-0.0348	0	0	inactive	-0.930883408	True
Bos_taurus	tRNA-Trp-CCA-23-1	chr17	69051469	69051542	-	39	-26.2	55.4	-0.00230137	47	0.016817594	0.069348128	-0.2284	0	0	inactive	-0.882940638	True
Bos_taurus	tRNA-Trp-CCA-24-1	chr13	55686602	55686675	-	39	-17	60.4	0.052657534	100	0.003880983	0.182101977	0.04735	0	26	inactive	-0.96094124	True
Bos_taurus	tRNA-Trp-CCA-25-1	chrX	63791470	63791543	-	39	-18.7	57.3	?	89	0.002587322	0.214987715	?	3	5	inactive	-0.901039509	True
Bos_taurus	tRNA-Trp-CCA-26-1	chrX	63797424	63797497	-	39	-18.7	58.4	?	86	0.007761966	0.098204265	0.3148	2	5	inactive	-0.934505673	True
Bos_taurus	tRNA-Trp-CCA-27-1	chrX	59802167	59802240	-	39	-15.3	62.9	0.080136986	132	0.01164295	0.128205128	-0.4285	0	13	inactive	-0.951025485	True
Bos_taurus	tRNA-Trp-CCA-28-1	chr13	36308942	36309015	+	39	-24.5	54.9	0.057808219	351	0.01164295	0.422705314	0.0175	0	9	inactive	-0.742722851	True
Bos_taurus	tRNA-Trp-CCA-29-1	chr3	92984962	92985035	-	39	-21.1	51.6	0.009219178	55	0.006468305	0.109717868	-0.37195	0	41	inactive	-0.924230372	True
Bos_taurus	tRNA-Trp-CCA-3-1	chr19	33715427	33715499	+	39	-26	77.9	0.369069444	10	0.046632124	0.662739323	-0.8109	0	29	active	0.893736886	True
Bos_taurus	tRNA-Trp-CCA-30-1	chr17	66720093	66720166	+	39	-20.4	53.9	-0.156109589	351	0.01164295	0.175967823	-0.04605	0	13	inactive	-0.952169566	True
Bos_taurus	tRNA-Trp-CCA-31-1	chr12	55467539	55467612	-	39	-13.9	63.2	-0.05069863	140	0.010349288	0.131381381	-0.07505	0	0	inactive	-0.953142024	True
Bos_taurus	tRNA-Trp-CCA-32-1	chr28	23558065	23558138	-	39	-14.6	62.8	?	137	0.003880983	0.071399429	?	0	3	inactive	-0.943996581	True
Bos_taurus	tRNA-Trp-CCA-33-1	chr24	28890581	28890654	-	39	-14.6	62.2	0.052479452	78	0.010349288	0.108932462	-0.0661	0	0	inactive	-0.94464763	True
Bos_taurus	tRNA-Trp-CCA-34-1	chr22	46224491	46224563	+	39	-23.2	54.4	0.057083333	351	0.007772021	0.144687888	-0.06055	0	6	inactive	-0.963479677	True
Bos_taurus	tRNA-Trp-CCA-35-1	chr6	24455742	24455815	-	39	-12.2	60.4	?	351	0.01164295	0.26119403	-0.06475	0	0	inactive	-0.933900904	True
Bos_taurus	tRNA-Trp-CCA-4-1	chr19	28459217	28459289	-	39	-24.5	73.4	1.079513889	8	0.042746114	0.931633511	-3.86135	6	117	active	0.943010517	True
Bos_taurus	tRNA-Trp-CCA-5-1	chr1	106602472	106602544	-	39	-18.7	56.1	0.004402778	6	0.007772021	0.080738178	-0.0913	0	0	inactive	-0.932702563	True
Bos_taurus	tRNA-Trp-CCA-6-1	chr23	15877035	15877108	+	39	-27	57.5	0.047739726	113	0.018111255	0.611735331	-0.24355	0	40	active	0.521263512	True
Bos_taurus	tRNA-Trp-CCA-7-1	chr5	114592460	114592533	+	39	-19.3	55.6	0.052726027	74	0.005174644	0.096418733	-0.0817	0	47	inactive	-0.957825623	True
Bos_taurus	tRNA-Trp-CCA-8-1	chr11	99008678	99008751	-	39	-20.2	59.4	0.080164384	351	0.02457956	0.424242424	0.1159	0	74	inactive	-0.606579477	True
Bos_taurus	tRNA-Trp-CCA-9-1	chr27	6921152	6921224	-	39	-20	64.4	?	351	0.012953368	0.206185567	-0.8414	0	4	inactive	-0.960681778	True
Bos_taurus	tRNA-Tyr-GTA-1-1	chr1	98350086	98350176	-	16	-30.2	77.9	0.079767123	7	0.011392405	0.188577586	-0.03755	0	46	inactive	-0.789673036	True
Bos_taurus	tRNA-Tyr-GTA-1-2	chr23	31292651	31292741	-	16	-25.7	77.9	0.316410959	7	0.029113924	0.556144068	-0.75305	3	33	active	0.931920553	True
Bos_taurus	tRNA-Tyr-GTA-1-3	chr23	31293059	31293149	-	16	-28.1	77.9	0.664739726	6	0.020253165	0.567567568	-2.2199	3	33	active	0.965773846	True
Bos_taurus	tRNA-Tyr-GTA-1-4	chr23	31300292	31300384	-	16	-31.3	77.9	1.494164384	7	0.032828283	0.649350649	-3.5556	3	37	active	0.988652241	True
Bos_taurus	tRNA-Tyr-GTA-2-1	chr11	72574187	72574276	-	16	-30	77.9	1.597616438	12	0.046894804	0.60708091	-3.6412	1	81	active	0.98850311	True
Bos_taurus	tRNA-Tyr-GTA-3-1	chr14	32153521	32153615	+	16	-29.2	74.9	0.819260274	11	0.059193955	0.804597701	-3.06265	2	19	active	0.987281301	True
Bos_taurus	tRNA-Tyr-GTA-4-1	chr10	26447246	26447336	-	16	-28.2	75.4	0.890287671	11	0.034177215	0.520123839	-3.9049	2	16	active	0.987201376	True
Bos_taurus	tRNA-Tyr-GTA-4-2	chr10	26478144	26478235	+	16	-28.6	75.4	0.17960274	15	0.022756005	0.266768293	-0.27025	5	18	active	0.715186789	True
Bos_taurus	tRNA-Tyr-GTA-4-3	chr10	26479991	26480081	+	16	-28.6	75.4	0.111780822	14	0.049367089	0.654069767	-0.80145	4	16	active	0.976603967	True
Bos_taurus	tRNA-Tyr-GTA-4-4	chr14	32154105	32154194	+	16	-31	75.5	1.194808219	11	0.063371356	0.90309633	-3.78365	2	19	active	0.98829656	True
Bos_taurus	tRNA-Tyr-GTA-4-5	chr21	45384155	45384245	-	16	-27.1	75.4	0.123958904	12	0.089873418	0.860837829	0.045	0	19	active	0.931535283	True
Bos_taurus	tRNA-Tyr-GTA-4-6	chr21	45403531	45403621	+	16	-27.7	75.4	0.123890411	12	0.056962025	0.947555693	0.04485	1	18	active	0.928343798	True
Bos_taurus	tRNA-Tyr-GTA-4-7	chr21	45409903	45409993	+	16	-27.1	75.4	0.123890411	12	0.064556962	0.607638889	0.04485	1	18	active	0.926390857	True
Bos_taurus	tRNA-Tyr-GTA-5-1	chr10	26474707	26474797	+	16	-31.9	72.6	0.111972603	14	0.025316456	0.359015272	-0.93985	5	18	active	0.83554516	True
Bos_taurus	tRNA-Tyr-GTA-6-1	chr20	33009751	33009840	+	16	-28.9	72.9	0.101630137	6	0.010139417	0.21875	-0.19925	0	1	inactive	-0.815502373	True
Bos_taurus	tRNA-Tyr-GTA-7-1	chr10	26475376	26475466	+	16	-27.1	74	0.07969863	13	0.007594937	0.139906729	-0.11755	5	18	inactive	-0.796674617	True
Bos_taurus	tRNA-Und-NNN-1-1	chr17	49411599	49411672	+	11	-16.5	56.6	0	217	0.012936611	0.224646983	0.0435	0	13	inactive	-0.956758762	True
Bos_taurus	tRNA-Und-NNN-10-1	chr16	58848652	58848725	-	11	-22.5	51.1	0.002917808	46	0.001293661	0.154661953	-0.01475	0	13	inactive	-0.909658242	True
Bos_taurus	tRNA-Und-NNN-11-1	chr18	53110968	53111042	-	11	-16.9	50.1	0.010378378	160	0.023255814	0.250286041	0.12235	0	70	inactive	-0.84714167	True
Bos_taurus	tRNA-Und-NNN-2-1	chr16	70047861	70047935	-	11	-23.7	55.7	0.078567568	296	0.002583979	0	-0.09995	0	7	inactive	-0.921324807	True
Bos_taurus	tRNA-Und-NNN-3-1	chr2	120297752	120297823	+	11	-19.1	55.5	0.078830986	83	0.015564202	0.08079409	0.0844	0	21	inactive	-0.919049704	True
Bos_taurus	tRNA-Und-NNN-4-1	chr16	79316425	79316498	-	11	-20.7	55.4	0.058178082	73	0.01164295	0.283324339	-0.4538	0	3	inactive	-0.887713802	True
Bos_taurus	tRNA-Und-NNN-5-1	chr19	26261917	26261990	-	11	-17.1	54.4	0.030726027	351	0.012936611	0.17875383	0.12355	0	13	inactive	-0.952312566	True
Bos_taurus	tRNA-Und-NNN-6-1	chr21	21032070	21032143	-	11	-17.1	54.4	0.064547945	99	0.010349288	0.336107554	-0.4962	0	14	inactive	-0.864071793	True
Bos_taurus	tRNA-Und-NNN-7-1	chrX	57207073	57207149	+	11	-17.2	52.4	0.078776316	158	0.005154639	0.087983912	-0.126	0	33	inactive	-0.951014551	True
Bos_taurus	tRNA-Und-NNN-8-1	chr4	12050935	12051008	-	11	-16.5	52.1	0.023452055	186	0.009055627	0.416171225	0.1229	0	4	inactive	-0.791691381	True
Bos_taurus	tRNA-Und-NNN-9-1	chr3	17348102	17348173	+	11	-25.2	51.3	0	172	0.009079118	0.171232877	-0.0448	0	8	inactive	-0.905588379	True
Bos_taurus	tRNA-Val-AAC-1-1	chr1	98394711	98394784	-	17	-24.7	79.4	1.51309589	11	0.031047865	0.481283422	-6.0936	0	41	active	0.987085879	True
Bos_taurus	tRNA-Val-AAC-1-2	chr3	21163118	21163191	+	17	-24.7	79.4	0	19	0.041397154	0.60137457	0	0	8	active	0.763190726	True
Bos_taurus	tRNA-Val-AAC-1-3	chr3	21243504	21243577	-	17	-24.7	79.4	0	7	0.042690815	0.601503759	0	3	5	active	0.810078774	True
Bos_taurus	tRNA-Val-AAC-1-4	chr3	21295878	21295951	+	17	-24.7	79.4	0.022123288	19	0.025873221	0.128676471	-0.59755	1	0	inactive	-0.587334904	True
Bos_taurus	tRNA-Val-AAC-1-5	chr3	21372011	21372084	+	17	-24.7	79.4	-0.03360274	7	0.040103493	0.496345587	-1.64825	2	0	active	0.924709838	True
Bos_taurus	tRNA-Val-AAC-1-6	chr7	41744163	41744236	-	17	-24.7	79.4	0.640191781	15	0.032341527	0.516917293	-3.85795	4	37	active	0.987660138	True
Bos_taurus	tRNA-Val-AAC-1-7	chr23	30816068	30816141	+	17	-24.7	79.4	0.416424658	18	0.043984476	0.400366049	-3.04675	7	22	active	0.967210162	True
Bos_taurus	tRNA-Val-AAC-10-1	chr23	31175099	31175172	+	17	-11.6	58.8	-0.469534247	94	0.005174644	0.18115942	-2.26235	5	11	inactive	-0.778591976	True
Bos_taurus	tRNA-Val-AAC-2-1	chr3	21014869	21014942	+	17	-22.5	77.1	0	20	0.029754204	0.48951049	0	0	10	active	0.653554289	True
Bos_taurus	tRNA-Val-AAC-3-1	chr23	30785669	30785742	-	17	-23	76.5	0.071520548	5	0.029754204	0.641319285	-0.2547	5	32	active	0.774010722	True
Bos_taurus	tRNA-Val-AAC-4-1	chr4	108016747	108016820	-	17	-23.4	79.6	0.101616438	19	0.010349288	0	-0.19415	0	9	inactive	-0.853295438	True
Bos_taurus	tRNA-Val-AAC-5-1	chr23	31190962	31191035	+	17	-24.8	78.6	-0.466082192	10	0.023285899	0.166666667	-2.02945	6	10	active	0.711641134	True
Bos_taurus	tRNA-Val-AAC-6-1	chr3	21057218	21057291	-	17	-20.9	73.3	0	20	0.027166882	0.413711584	0	5	6	active	0.557234671	True
Bos_taurus	tRNA-Val-AAC-7-1	chr3	21130035	21130108	+	17	-16.4	70.2	-0.012465753	19	0.014230272	0.153609831	-0.01285	1	7	inactive	-0.934787231	True
Bos_taurus	tRNA-Val-AAC-8-1	chr3	21261653	21261726	-	17	-23.1	66.6	0	19	0.033635188	0.515463918	0	4	5	active	0.714846239	True
Bos_taurus	tRNA-Val-AAC-9-1	chr3	21050351	21050424	-	17	-19.3	58.6	0.002575342	351	0.014230272	0.127427184	-0.48715	2	5	inactive	-0.941340135	False
Bos_taurus	tRNA-Val-AAC-9-2	chr3	21210347	21210420	-	17	-19.3	58.6	-0.20171875	118	0.019404916	0.127427184	-0.599076923	4	5	inactive	-0.726877311	False
Bos_taurus	tRNA-Val-CAC-1-1	chr3	21029528	21029601	+	27	-24.9	79.3	0.065876712	13	0.06080207	0.546875	-0.49935	4	10	active	0.81667145	True
Bos_taurus	tRNA-Val-CAC-1-2	chr3	21226581	21226654	-	27	-24.9	79.3	0.057835616	3	0.058214748	0.564516129	-0.15625	5	5	active	0.799312476	True
Bos_taurus	tRNA-Val-CAC-1-3	chr3	21316062	21316135	-	27	-24.9	79.3	0.094273973	13	0.042690815	0.495189587	-0.3161	6	0	active	0.83926868	True
Bos_taurus	tRNA-Val-CAC-1-4	chr3	21316931	21317004	-	27	-24.9	79.3	?	13	0.043984476	0.4784689	?	7	0	active	0.937961547	False
Bos_taurus	tRNA-Val-CAC-1-5	chr3	21317839	21317912	-	27	-24.9	79.3	?	13	0.058214748	0.523076923	?	7	0	active	0.937961547	False
Bos_taurus	tRNA-Val-CAC-10-1	chr7	19217464	19217537	-	27	-25.6	57.6	-0.080835616	351	0.014230272	0.215871711	-0.18695	0	86	inactive	-0.949943259	True
Bos_taurus	tRNA-Val-CAC-11-1	chr25	37009864	37009937	-	27	-18.8	61.7	0.02790411	91	0.012936611	0.203488372	-0.41805	0	43	inactive	-0.940464708	True
Bos_taurus	tRNA-Val-CAC-12-1	chr1	16299906	16299978	+	27	-13.3	57.7	0.012208333	29	0.007772021	0.262172285	-0.2379	0	0	inactive	-0.927705808	True
Bos_taurus	tRNA-Val-CAC-13-1	chrX	147170476	147170549	+	27	-22	63.4	0.006808219	252	0.002587322	0.141414141	-0.1507	0	0	inactive	-0.967128996	True
Bos_taurus	tRNA-Val-CAC-14-1	chr16	69952019	69952092	+	27	-15.8	55.9	-0.113150685	127	0.003880983	0	0.03845	0	7	inactive	-0.929795401	True
Bos_taurus	tRNA-Val-CAC-15-1	chr18	46197550	46197622	-	27	-22.9	60.3	0.096291667	99	0.018134715	0.274971942	0.0198	0	62	inactive	-0.64386151	True
Bos_taurus	tRNA-Val-CAC-2-1	chr3	8152756	8152829	+	27	-24.7	79.4	1.068493151	13	0.051746442	0.603667393	-1.4613	0	15	active	0.968660786	True
Bos_taurus	tRNA-Val-CAC-2-2	chr3	21004526	21004599	+	27	-24.7	79.4	0.093305556	13	0.058214748	0.505093379	-0.6008	2	10	active	0.857976244	True
Bos_taurus	tRNA-Val-CAC-2-3	chr3	21444909	21444982	-	27	-24.7	79.4	0.17469863	9	0.063389392	0.685736677	-3.6406	5	24	active	0.97407197	True
Bos_taurus	tRNA-Val-CAC-2-4	chr7	41749128	41749201	-	27	-24.7	79.4	1.38490411	2	0.053040103	0.794461469	-3.05115	2	38	active	0.979783417	True
Bos_taurus	tRNA-Val-CAC-2-5	chr23	31092996	31093069	-	27	-24.7	79.4	0.056493151	0	0.03622251	0.335634829	-0.5786	4	19	active	0.602828093	True
Bos_taurus	tRNA-Val-CAC-2-6	chr23	31330737	31330810	-	27	-24.7	79.4	1.329273973	4	0.068564036	0.606469003	-3.90265	3	50	active	0.979783417	True
Bos_taurus	tRNA-Val-CAC-3-1	chr3	21209248	21209321	+	27	-24.2	79	0.109287671	13	0.063389392	0.55239899	-3.311	4	5	active	0.960165753	True
Bos_taurus	tRNA-Val-CAC-3-2	chr23	30909777	30909850	+	27	-24.2	79	0.184780822	22	0.04915912	0.748462978	-0.7421	12	10	active	0.844713023	False
Bos_taurus	tRNA-Val-CAC-3-3	chr23	30910582	30910655	+	27	-24.2	79	0.184780822	22	0.068564036	0.748462978	-0.7421	12	10	active	0.844713023	False
Bos_taurus	tRNA-Val-CAC-3-4	chr23	30912159	30912232	+	27	-24.2	79	0.184780822	22	0.063389392	0.748462978	-0.7421	14	10	active	0.844713023	True
Bos_taurus	tRNA-Val-CAC-4-1	chr3	21369307	21369380	+	27	-22.7	78.2	-0.042446154	9	0.032341527	0.412848199	-0.7036	2	0	active	0.681085474	True
Bos_taurus	tRNA-Val-CAC-5-1	chr3	21066853	21066926	-	27	-20.6	74.2	0.093819444	2	0.06080207	0.616631431	-0.49715	4	3	active	0.790996382	True
Bos_taurus	tRNA-Val-CAC-6-1	chr3	21177497	21177570	+	27	-22.4	71.4	0.079917808	3	0.064683053	0.630114566	-0.31865	4	8	active	0.8329399	True
Bos_taurus	tRNA-Val-CAC-7-1	chr3	21048256	21048329	+	27	-15.1	67.2	0.101835616	19	0.016817594	0.136363636	-0.4831	2	6	inactive	-0.843870158	True
Bos_taurus	tRNA-Val-CAC-8-1	chr3	21072741	21072814	-	27	-9.8	62.4	0.204465753	101	0.046571798	0.562381853	-3.52	3	3	active	0.800801047	True
Bos_taurus	tRNA-Val-CAC-9-1	chr2	130212810	130212883	-	27	-27	65.8	0.075493151	223	0.009055627	0.072239422	0.0389	0	5	inactive	-0.891817387	True
Bos_taurus	tRNA-Val-GAC-1-1	chrX	132039150	132039225	+	1	-19.6	60.8	-0.23148	9	0.023225806	0.327452553	-0.6358	5	24	inactive	-0.58018829	True
Bos_taurus	tRNA-Val-TAC-1-1	chr3	20994280	20994353	+	13	-24.7	79.4	0.137328767	122	0.064683053	0.758522964	-3.23765	2	10	active	0.916186948	True
Bos_taurus	tRNA-Val-TAC-1-2	chr3	21025809	21025882	+	13	-24.7	79.4	0.129657534	90	0.043984476	0.547983054	-3.1938	4	10	active	0.95872757	True
Bos_taurus	tRNA-Val-TAC-10-1	chr17	61049982	61050054	-	13	-24.8	67.7	-0.039041667	117	0.007772021	0.364583333	0.03785	0	17	inactive	-0.812182461	True
Bos_taurus	tRNA-Val-TAC-11-1	chr20	62526176	62526249	+	13	-11.4	53.6	-0.023684932	171	0.007761966	0.172839506	0.1244	0	1	inactive	-0.961256864	True
Bos_taurus	tRNA-Val-TAC-12-1	chr5	26880482	26880555	+	13	-15.5	51.5	0.042191781	43	0.002587322	0.106691053	-0.0614	0	79	inactive	-0.915862759	True
Bos_taurus	tRNA-Val-TAC-2-1	chr3	21251187	21251260	-	13	-17.8	72.1	-0.041657534	90	0.043984476	0.583333333	-0.6996	5	5	active	0.681036604	True
Bos_taurus	tRNA-Val-TAC-3-1	chrX	132024378	132024451	+	13	-22.9	80.4	1.199794521	12	0.093143596	1.124415888	-5.37845	3	23	active	0.986310232	True
Bos_taurus	tRNA-Val-TAC-4-1	chr15	84095407	84095480	-	13	-23.6	80.5	1.13669863	19	0.115135834	0.904593118	-3.0313	5	30	active	0.968876207	True
Bos_taurus	tRNA-Val-TAC-5-1	chr23	31009219	31009292	+	13	-27.1	76	-0.066442857	15	0.053040103	0.859284145	0.12365	0	27	active	0.783600334	True
Bos_taurus	tRNA-Val-TAC-6-1	chr23	31105499	31105572	+	13	-26.1	82.3	0.464246575	16	0.014230272	0.171947924	-1.70095	2	19	inactive	-0.633955823	True
Bos_taurus	tRNA-Val-TAC-7-1	chr3	21230095	21230168	-	13	-17.2	55.1	0.20909589	90	0.03622251	0.484809308	-3.4028	5	5	active	0.647652674	True
Bos_taurus	tRNA-Val-TAC-8-1	chr9	40730548	40730620	-	13	-9	52.4	-0.140097222	299	0.010362694	0.076252723	0.1229	0	2	inactive	-0.930642222	True
Bos_taurus	tRNA-Val-TAC-9-1	chr11	63649673	63649746	-	13	-25.3	70.7	0.053972603	286	0.025873221	0.526315789	-0.21125	0	10	active	0.507121053	True
Canis_lupus_familiaris	tRNA-Ala-AGC-1-1	chr6	25378673	25378745	-	13	-27	83.6	0.180986111	29	0.006476684	0	-0.43885	0	7	inactive	-0.717200584	True
Canis_lupus_familiaris	tRNA-Ala-AGC-1-2	chr35	25761989	25762061	-	13	-27	83.6	0.808944444	1	0.056994819	1.022063595	-3.784	0	5	active	0.968851071	True
Canis_lupus_familiaris	tRNA-Ala-AGC-10-1	chr1	78766732	78766804	+	13	-20.6	57	-0.366375	0	0.002590674	0	-0.33915	0	1	inactive	-0.860394314	True
Canis_lupus_familiaris	tRNA-Ala-AGC-2-1	chr35	25802828	25802900	-	13	-29	84.4	0.098180556	22	0.018134715	0.171568627	-0.641882353	1	2	active	0.501434091	True
Canis_lupus_familiaris	tRNA-Ala-AGC-3-1	chr35	25733009	25733081	+	13	-29.9	80.3	?	4	0.028497409	0.422654269	?	2	10	active	0.971282543	True
Canis_lupus_familiaris	tRNA-Ala-AGC-4-1	chr35	25860182	25860254	-	13	-31.9	84.7	0.97575	1	0.079015544	0.801649107	-3.1432	1	18	active	0.976534838	True
Canis_lupus_familiaris	tRNA-Ala-AGC-4-2	chr35	25870742	25870814	-	13	-31.9	84.7	1.076069444	1	0.090673575	0.781202871	-2.9289	1	20	active	0.977650489	True
Canis_lupus_familiaris	tRNA-Ala-AGC-5-1	chr35	24443249	24443322	-	13	-28.1	59.6	0.268547945	2	0.054333765	0.910442215	-1.663	2	25	active	0.967067594	True
Canis_lupus_familiaris	tRNA-Ala-AGC-6-1	chr17	21046702	21046775	+	13	-32	59.7	1.64130137	6	0.067270375	0.853658537	-2.3599	1	98	active	0.979643416	True
Canis_lupus_familiaris	tRNA-Ala-AGC-6-2	chr29	15777179	15777252	+	13	-32	59.7	1.686684932	10	0.053040103	0.962545836	-1.1533	3	22	active	0.982562688	True
Canis_lupus_familiaris	tRNA-Ala-AGC-7-1	chr35	24341107	24341180	-	13	-29.6	58.9	1.122575342	1	0.046571798	0.777777778	-2.5061	2	31	active	0.974367856	True
Canis_lupus_familiaris	tRNA-Ala-AGC-8-1	chr18	49432967	49433040	+	13	-27.7	54.6	0.846986301	8	0.07373868	0.901639344	-1.70025	0	25	active	0.780786511	True
Canis_lupus_familiaris	tRNA-Ala-AGC-9-1	chr35	24427619	24427692	-	13	-27.2	53.7	0.281671233	2	0.014230272	0.228937729	-1.6754	2	27	inactive	-0.66278363	True
Canis_lupus_familiaris	tRNA-Ala-CGC-1-1	chr35	24320137	24320209	+	4	-26.5	79.7	1.471361111	5	0.018134715	0.199771689	-3.97885	3	34	active	0.831099822	True
Canis_lupus_familiaris	tRNA-Ala-CGC-2-1	chr35	25778047	25778119	-	4	-26.5	78.7	1.112861111	6	0.045336788	0.751633987	-2.0006	0	3	active	0.973545251	True
Canis_lupus_familiaris	tRNA-Ala-CGC-3-1	chr36	2608838	2608910	+	4	-27.6	74.4	1.71525	15	0.085492228	2.349537037	-2.41905	1	24	active	0.984650808	True
Canis_lupus_familiaris	tRNA-Ala-CGC-4-1	chr35	25793383	25793455	-	4	-26.4	77.3	0.372861111	7	0.016839378	0.306096952	-5.138368421	1	3	active	0.645342174	True
Canis_lupus_familiaris	tRNA-Ala-TGC-1-1	chr11	404507	404579	+	11	-26.5	79.7	1.414805556	17	0.050518135	0.632911392	-3.93215	3	33	active	0.988841405	True
Canis_lupus_familiaris	tRNA-Ala-TGC-1-2	chr26	5001251	5001323	+	11	-26.5	79.7	1.407388889	5	0.011658031	0.183823529	-2.8767	4	49	active	0.51409831	True
Canis_lupus_familiaris	tRNA-Ala-TGC-2-1	chr26	4996184	4996256	-	11	-26.5	78.7	0.785361111	1	0.03626943	0.73493083	-2.7838	4	47	active	0.987663254	True
Canis_lupus_familiaris	tRNA-Ala-TGC-2-2	chr35	25740769	25740841	+	11	-26.5	78.7	0.147347222	44	0.006476684	0.189393939	-2.02655	2	7	inactive	-0.677444652	True
Canis_lupus_familiaris	tRNA-Ala-TGC-3-1	chr25	15408767	15408839	+	11	-26.4	78.5	0	285	0.015544041	0.172583826	0.0058	0	11	inactive	-0.902521121	True
Canis_lupus_familiaris	tRNA-Ala-TGC-4-1	chr35	25821688	25821760	+	11	-31.7	77.1	0.331666667	16	0.007772021	0.241268382	-0.88265	3	4	inactive	-0.669825635	True
Canis_lupus_familiaris	tRNA-Ala-TGC-4-2	chr35	25847029	25847101	-	11	-31.7	77.1	0.350986111	16	0.019430052	0.163246269	-0.94875	1	11	active	0.683110461	True
Canis_lupus_familiaris	tRNA-Ala-TGC-5-1	chr1	5696581	5696653	+	11	-25.3	78.7	-0.027375	4	0.006476684	0.225225225	-1.6415	0	5	inactive	-0.727086535	True
Canis_lupus_familiaris	tRNA-Ala-TGC-6-1	chr35	25736493	25736564	-	11	-18.3	56.8	0.490704225	93	0.033722438	0.866336634	-2.4866	2	8	active	0.836881772	True
Canis_lupus_familiaris	tRNA-Ala-TGC-7-1	chr35	25852160	25852232	-	11	-15.5	51.6	0.286541667	12	0.005181347	0.063131313	-0.4609	2	16	inactive	-0.85697203	True
Canis_lupus_familiaris	tRNA-Ala-TGC-8-1	chr6	50435197	50435270	-	11	-19.9	57.8	0.007123288	93	0.003880983	0.164165103	-0.1768	0	0	inactive	-0.925186769	True
Canis_lupus_familiaris	tRNA-Arg-ACG-1-1	chr8	3257811	3257884	+	6	-25.4	67.6	1.628547945	56	0.054333765	0.964092474	-3.0531	0	94	active	0.96271544	True
Canis_lupus_familiaris	tRNA-Arg-ACG-1-2	chr35	24301842	24301915	+	6	-25.4	67.6	1.333246575	15	0.103492885	1.060238878	-1.612	3	32	active	0.971036544	True
Canis_lupus_familiaris	tRNA-Arg-ACG-2-1	chr29	15775915	15775988	-	6	-23.7	64.6	0.782178082	2	0.098318241	0.910865322	-2.11875	3	22	active	0.982401664	True
Canis_lupus_familiaris	tRNA-Arg-ACG-3-1	chr35	24450475	24450548	-	6	-25.4	68.8	0.317041096	13	0.015523933	0.213512277	-1.6035	2	25	inactive	-0.697986347	True
Canis_lupus_familiaris	tRNA-Arg-ACG-4-1	chr20	42791712	42791785	+	6	-23.1	64.2	1.555205479	8	0.130659767	1.192214112	-3.1792	0	34	active	0.940248174	True
Canis_lupus_familiaris	tRNA-Arg-ACG-5-1	chr35	24935197	24935270	-	6	-22.9	63	0.700068493	9	0.015523933	0.107725454	-2.78365	4	26	inactive	-0.592838808	True
Canis_lupus_familiaris	tRNA-Arg-CCG-1-1	chr6	38064172	38064245	-	3	-27.1	67	1.389205479	12	0.106080207	0.862676056	-4.8937	1	52	active	0.944152267	True
Canis_lupus_familiaris	tRNA-Arg-CCG-1-2	chr35	25879028	25879101	+	3	-27.1	67	0.454561644	3	0.091849935	0.842035217	-1.10395	1	20	active	0.920915164	True
Canis_lupus_familiaris	tRNA-Arg-CCG-2-1	chr9	12559906	12559979	+	3	-29	64.9	1.706479452	12	0.09702458	1.063132817	0.3402	0	37	active	0.887022318	True
Canis_lupus_familiaris	tRNA-Arg-CCT-1-1	chr9	5445716	5445789	+	12	-32.1	71.1	0.857150685	27	0.087968952	1.123595506	?	2	71	active	0.974696871	True
Canis_lupus_familiaris	tRNA-Arg-CCT-10-1	chr18	50619450	50619523	-	12	-17.6	50.3	-0.241630137	351	0.006468305	0.256081946	-0.3159	0	61	inactive	-0.922285309	True
Canis_lupus_familiaris	tRNA-Arg-CCT-11-1	chr30	30708763	30708836	-	12	-17.6	60.5	0.042027397	128	0.002587322	0.052410901	0.1276	0	47	inactive	-0.949937685	True
Canis_lupus_familiaris	tRNA-Arg-CCT-2-1	chr6	38018289	38018362	-	12	-32.1	72.3	0.82509589	35	0.03622251	0.711864407	-2.02165	4	53	active	0.981205765	True
Canis_lupus_familiaris	tRNA-Arg-CCT-2-2	chr9	5446063	5446136	-	12	-32.1	72.3	1.324356164	8	0.09702458	1.033386328	-3.05645	2	71	active	0.977817579	True
Canis_lupus_familiaris	tRNA-Arg-CCT-3-1	chr6	38062681	38062754	-	12	-30.6	71.7	0.958684932	12	0.041397154	0.764563107	-2.73175	2	53	active	0.987571312	True
Canis_lupus_familiaris	tRNA-Arg-CCT-4-1	chr9	5444635	5444708	-	12	-30.2	67.5	1.072273973	23	0.041397154	0.770825236	-0.3246	2	71	active	0.938444929	True
Canis_lupus_familiaris	tRNA-Arg-CCT-5-1	chr16	9418799	9418872	-	12	-27.2	65.6	1.680178082	6	0.068564036	1.141773938	-1.08465	0	39	active	0.964629992	True
Canis_lupus_familiaris	tRNA-Arg-CCT-6-1	chr6	38031034	38031107	+	12	-33.6	73.6	0.449123288	11	0.072445019	0.80905279	-0.748	6	47	active	0.962810602	True
Canis_lupus_familiaris	tRNA-Arg-CCT-7-1	chrX	87319839	87319912	+	12	-15.8	55	-0.198356164	74	0.007761966	0.142857143	-0.40615	0	5	inactive	-0.905306992	True
Canis_lupus_familiaris	tRNA-Arg-CCT-8-1	chrX	12728615	12728688	+	12	-12	56.1	0.070863014	58	0.007761966	0.100430416	-0.24685	0	8	inactive	-0.933934184	True
Canis_lupus_familiaris	tRNA-Arg-CCT-9-1	chr26	23777262	23777335	+	12	-10.7	54.1	-0.019835616	107	0.002587322	0.061403509	-0.3467	0	18	inactive	-0.949222241	True
Canis_lupus_familiaris	tRNA-Arg-TCG-1-1	chr3	52374415	52374488	+	4	-29.2	74.8	1.621342466	19	0.089262613	0.860596954	-3.0822	0	73	active	0.985814391	True
Canis_lupus_familiaris	tRNA-Arg-TCG-2-1	chr35	24217951	24218024	+	4	-23.7	65.5	0.754013699	61	0.028460543	0.14632107	-2.8106	5	37	active	0.840279215	True
Canis_lupus_familiaris	tRNA-Arg-TCG-3-1	chr35	24198780	24198853	+	4	-23.7	64.3	1.140849315	30	0.050452781	0.671416827	-5.25195	2	42	active	0.983721957	True
Canis_lupus_familiaris	tRNA-Arg-TCG-4-1	chr35	25680038	25680111	-	4	-13.9	51	1.105178082	9	0.025873221	0.200228833	-3.0827	0	16	active	0.526758593	True
Canis_lupus_familiaris	tRNA-Arg-TCT-1-1	chr9	55178081	55178172	+	7	-31.4	70.1	0.283465753	2	0.067003793	0.951591512	-2.24315	0	92	active	0.980523863	True
Canis_lupus_familiaris	tRNA-Arg-TCT-1-2	chr18	37205583	37205669	-	7	-30.4	70.3	1.268465753	1	0.103053435	0.927754678	-2.36155	5	27	active	0.979324518	True
Canis_lupus_familiaris	tRNA-Arg-TCT-2-1	chr6	55275212	55275297	-	7	-30.4	71.1	1.649	3	0.133757962	0.950321802	0.82115	0	32	active	0.910368983	True
Canis_lupus_familiaris	tRNA-Arg-TCT-3-1	chr5	32943673	32943760	+	7	-25.6	70.8	1.568136986	1	0.066073698	0.906862745	-0.2697	4	99	active	0.965686109	True
Canis_lupus_familiaris	tRNA-Arg-TCT-4-1	chr38	22823225	22823299	+	7	-27.7	78.5	1.657081081	19	0.065891473	0.679367362	1.54095	0	39	active	0.962463606	True
Canis_lupus_familiaris	tRNA-Arg-TCT-5-1	chr12	58515658	58515731	+	7	-22.6	78.9	-0.007041096	214	0.002587322	0	-0.2336	0	11	inactive	-0.925351501	True
Canis_lupus_familiaris	tRNA-Arg-TCT-6-1	chr4	18744985	18745058	-	7	-24.6	77	?	166	0.001293661	0.07918552	0.317384615	0	1	inactive	-0.855553801	True
Canis_lupus_familiaris	tRNA-Asn-GTT-1-1	chr2	10907753	10907827	+	14	-26.4	80.9	1.47127027	8	0.07622739	0.791407575	-3.23695	0	2	active	0.963516328	True
Canis_lupus_familiaris	tRNA-Asn-GTT-1-2	chr9	23485324	23485398	+	14	-26.4	80.9	1.630391892	6	0.045219638	0.903614458	-1.7134	0	68	active	0.984614273	True
Canis_lupus_familiaris	tRNA-Asn-GTT-1-3	chr17	58835774	58835848	-	14	-26.4	80.9	-0.626714286	10	0.065891473	0.780405405	?	0	24	active	0.935660904	True
Canis_lupus_familiaris	tRNA-Asn-GTT-1-4	chr17	58882867	58882941	+	14	-26.4	80.9	-0.163478873	20	0.04005168	0.68627451	-0.804888889	0	10	active	0.915527961	True
Canis_lupus_familiaris	tRNA-Asn-GTT-1-5	chr20	57449038	57449112	-	14	-26.4	80.9	?	3	0.151162791	0.895140665	?	1	72	active	0.938902475	True
Canis_lupus_familiaris	tRNA-Asn-GTT-1-6	chr35	24361952	24362026	-	14	-26.4	80.9	0.438675676	31	0.050387597	0.693943764	-1.4801	1	29	active	0.977818381	True
Canis_lupus_familiaris	tRNA-Asn-GTT-2-1	chr38	21113461	21113535	+	14	-26.4	81.5	0.247540541	13	0.023255814	0.299145299	-3.19895	8	20	active	0.845527847	True
Canis_lupus_familiaris	tRNA-Asn-GTT-3-1	chr17	58995318	58995392	+	14	-26.4	73.3	0.485310811	8	0.060723514	0.861490266	-1.42615	3	19	active	0.98099877	True
Canis_lupus_familiaris	tRNA-Asn-GTT-4-1	chr17	59066070	59066144	-	14	-27.3	82	0.182405405	14	0.034883721	0.474147663	-0.6718	1	31	active	0.937691096	True
Canis_lupus_familiaris	tRNA-Asn-GTT-5-1	chr17	58897497	58897571	-	14	-28.6	80.7	0.474216216	8	0.081395349	0.791407575	-1.3658	3	12	active	0.977781907	True
Canis_lupus_familiaris	tRNA-Asn-GTT-5-2	chr17	58920113	58920187	+	14	-28.6	80.7	0.485310811	8	0.082687339	0.765349033	-1.32025	3	10	active	0.97126613	True
Canis_lupus_familiaris	tRNA-Asn-GTT-5-3	chr17	58978320	58978394	-	14	-28.6	80.7	0.474216216	8	0.033591731	0.26481715	-1.22265	1	18	active	0.841290463	True
Canis_lupus_familiaris	tRNA-Asn-GTT-6-1	chr8	16403454	16403528	-	14	-21.9	57.3	0.405851351	148	0.025839793	0.565558633	-1.6173125	0	3	active	0.733049673	True
Canis_lupus_familiaris	tRNA-Asn-GTT-7-1	chr17	58988709	58988783	-	14	-20	52.5	0.462689189	180	0.062015504	1.038847665	-1.5485	2	19	active	0.684661946	True
Canis_lupus_familiaris	tRNA-Asp-ATC-1-1	chr16	33673103	33673176	-	1	-10.1	58	0.004342466	281	0.006468305	0.165406427	-0.0174	0	35	inactive	-0.95667537	True
Canis_lupus_familiaris	tRNA-Asp-GTC-1-1	chr15	37922892	37922964	+	11	-26.4	65.4	1.144013889	9	0.079015544	0.778162055	-3.8934	1	29	active	0.985745987	True
Canis_lupus_familiaris	tRNA-Asp-GTC-2-1	chr5	33028676	33028748	-	11	-26.4	66.5	1.465777778	12	0.095854922	0.754618029	-4.67935	6	126	active	0.986090354	True
Canis_lupus_familiaris	tRNA-Asp-GTC-2-10	chr38	21109645	21109717	+	11	-26.4	66.5	0	15	0.155440415	1.064516129	0	9	22	active	0.679878757	False
Canis_lupus_familiaris	tRNA-Asp-GTC-2-2	chr15	35831101	35831173	+	11	-26.4	66.5	1.665583333	16	0.051813472	0.868055556	-2.75245	0	53	active	0.988134584	True
Canis_lupus_familiaris	tRNA-Asp-GTC-2-3	chr26	4996493	4996565	+	11	-26.4	66.5	0.759680556	13	0.04015544	0.588235294	-2.6196	4	47	active	0.987364341	True
Canis_lupus_familiaris	tRNA-Asp-GTC-2-4	chr26	4998772	4998844	+	11	-26.4	66.5	1.583583333	12	0.067357513	0.955703883	-4.60715	4	49	active	0.988395041	True
Canis_lupus_familiaris	tRNA-Asp-GTC-2-5	chr35	24816827	24816899	+	11	-26.4	66.5	0.304875	12	0.075129534	0.789689594	-1.5817	3	14	active	0.977984017	True
Canis_lupus_familiaris	tRNA-Asp-GTC-2-6	chr35	24874681	24874753	-	11	-26.4	66.5	0.016972222	14	0.058290155	0.524737631	-1.35335	3	6	active	0.929674841	True
Canis_lupus_familiaris	tRNA-Asp-GTC-2-7	chr38	21070639	21070711	-	11	-26.4	66.5	0.686694444	13	0.073834197	1.010553564	-3.3294	3	15	active	0.986895997	True
Canis_lupus_familiaris	tRNA-Asp-GTC-2-8	chr38	21090962	21091034	-	11	-26.4	66.5	0	15	0.133419689	0.905656472	0	8	21	active	0.709998011	True
Canis_lupus_familiaris	tRNA-Asp-GTC-2-9	chr38	21094772	21094844	+	11	-26.4	66.5	0	15	0.155440415	1.044067797	0	10	21	active	0.705998011	False
Canis_lupus_familiaris	tRNA-Cys-GCA-1-1	chr9	23208298	23208370	+	19	-26.1	81.9	1.559611111	13	0.042746114	0.374331551	-4.6577	1	70	active	0.909158523	True
Canis_lupus_familiaris	tRNA-Cys-GCA-1-2	chr9	23208984	23209056	+	19	-26.1	81.9	1.664569444	9	0.047927461	0.784167289	-2.02135	1	68	active	0.98621592	True
Canis_lupus_familiaris	tRNA-Cys-GCA-1-3	chr9	23387283	23387355	-	19	-26.1	81.9	1.359972222	15	0.006476684	0	-3.1841	2	46	inactive	-0.621232825	True
Canis_lupus_familiaris	tRNA-Cys-GCA-10-1	chr16	14465849	14465921	-	19	-18.4	64.6	0.402013889	11	0.010362694	0.202546296	-0.88045	4	34	inactive	-0.847573496	True
Canis_lupus_familiaris	tRNA-Cys-GCA-2-1	chr23	29226784	29226856	-	19	-24.6	81.8	1.280736111	8	0.006476684	0.292031706	-1.4135	1	1	inactive	-0.641288252	True
Canis_lupus_familiaris	tRNA-Cys-GCA-3-1	chr9	23385570	23385642	+	19	-23.9	81.8	1.566819444	6	0.050518135	0.755568639	-1.69615	2	46	active	0.983504554	True
Canis_lupus_familiaris	tRNA-Cys-GCA-4-1	chr9	23391139	23391211	+	19	-26.1	77.3	1.032847222	11	0.007772021	0.050316274	-1.3677	2	47	inactive	-0.802301003	True
Canis_lupus_familiaris	tRNA-Cys-GCA-4-2	chr9	23410137	23410209	+	19	-26.1	77.3	1.032902778	10	0.007772021	0.156810036	-3.04685	0	48	inactive	-0.73798089	True
Canis_lupus_familiaris	tRNA-Cys-GCA-4-3	chr16	14329020	14329092	+	19	-26.1	77.3	0.485458333	16	0.023316062	0.446078431	-1.16745	2	34	active	0.92594533	True
Canis_lupus_familiaris	tRNA-Cys-GCA-4-4	chr16	14462511	14462583	+	19	-26.1	77.3	0.343263889	13	0.006476684	0.045207957	-1.65715	3	34	inactive	-0.755561873	True
Canis_lupus_familiaris	tRNA-Cys-GCA-4-5	chr16	14470706	14470778	-	19	-26.1	77.3	0.052222222	103	0.009067358	0.108560794	-1.48655	4	39	inactive	-0.763673555	True
Canis_lupus_familiaris	tRNA-Cys-GCA-5-1	chr16	14330247	14330319	+	19	-24.6	77.2	0.340541667	8	0.005181347	0.160845588	-1.23325	2	35	inactive	-0.881183222	True
Canis_lupus_familiaris	tRNA-Cys-GCA-5-2	chr16	14450055	14450127	+	19	-24.6	77.2	0.422347222	9	0.001295337	0.0625	-1.4347	2	34	inactive	-0.795699899	True
Canis_lupus_familiaris	tRNA-Cys-GCA-5-3	chr16	14481686	14481758	+	19	-24.6	77.2	0.504138889	12	0.00388601	0.057956615	-0.74785	2	57	inactive	-0.878134491	True
Canis_lupus_familiaris	tRNA-Cys-GCA-5-4	chr23	29229338	29229410	-	19	-24.6	77.2	1.336680556	11	0.007772021	0.196998124	-1.0501	1	2	inactive	-0.854267414	True
Canis_lupus_familiaris	tRNA-Cys-GCA-6-1	chr16	14459118	14459190	+	19	-24.6	74	0.767138889	29	0.011658031	0.226244344	-1.0225	4	35	inactive	-0.821397513	True
Canis_lupus_familiaris	tRNA-Cys-GCA-7-1	chr16	14451085	14451157	+	19	-24.6	71.5	0.326722222	351	0.005181347	0.112233446	-2.05305	2	34	inactive	-0.814605115	True
Canis_lupus_familiaris	tRNA-Cys-GCA-8-1	chr16	14474310	14474382	-	19	-26.1	72.8	0.516416667	88	0.042746114	0.57057921	-1.36685	4	43	active	0.953825702	True
Canis_lupus_familiaris	tRNA-Cys-GCA-9-1	chr16	14478181	14478253	-	19	-25.8	64.6	0.433819444	5	0.034974093	0.495867769	-1.7792	3	51	active	0.980190779	True
Canis_lupus_familiaris	tRNA-Gln-CTG-1-1	chr5	32942547	32942619	+	9	-24.7	71.5	1.419416667	4	0.034974093	0.705076551	-5.0493	4	95	active	0.988787245	True
Canis_lupus_familiaris	tRNA-Gln-CTG-1-2	chr30	30200403	30200475	-	9	-24.7	71.5	1.598555556	12	0.063471503	0.793016127	-2.4688	0	25	active	0.988346915	True
Canis_lupus_familiaris	tRNA-Gln-CTG-1-3	chr35	24828108	24828180	+	9	-24.7	71.5	0.577763889	11	0.045336788	0.712239976	-1.4056	2	11	active	0.980104093	True
Canis_lupus_familiaris	tRNA-Gln-CTG-1-4	chr35	25940599	25940671	-	9	-24.7	71.5	1.165555556	4	0.054404145	0.617116506	-3.35105	3	26	active	0.98865443	True
Canis_lupus_familiaris	tRNA-Gln-CTG-2-1	chr17	58855416	58855488	+	9	-24.2	71.1	-0.851638889	25	0.031088083	0.167410714	-0.94845	0	8	active	0.534753755	True
Canis_lupus_familiaris	tRNA-Gln-CTG-4-1	chr17	57585156	57585228	+	9	-24.7	70.9	0.297416667	28	0.107512953	0.875801038	-0.58215	1	45	active	0.937721106	True
Canis_lupus_familiaris	tRNA-Gln-CTG-4-2	chr17	57593322	57593394	-	9	-24.7	70.9	0.278194444	28	0.110103627	0.891017093	-0.45745	1	41	active	0.923213417	True
Canis_lupus_familiaris	tRNA-Gln-CTG-5-1	chr35	24658363	24658435	+	9	-11.6	52.6	0.461375	19	0.024611399	0.508166969	-2.4318	1	27	active	0.539893804	True
Canis_lupus_familiaris	tRNA-Gln-CTG-6-1	chr24	3528881	3528949	+	9	-23.6	51.3	0	230	0.005208333	0.162037037	0.1546	0	8	inactive	-0.911917323	True
Canis_lupus_familiaris	tRNA-Gln-TTG-1-1	chr9	25357308	25357380	+	5	-27.1	72.6	1.640986111	9	0.102331606	0.946201676	0.32985	0	41	active	0.962007529	True
Canis_lupus_familiaris	tRNA-Gln-TTG-2-1	chr35	24210144	24210216	-	5	-22	66.9	0.719680556	7	0.03626943	0.546875	-2.2493	5	35	active	0.982112952	True
Canis_lupus_familiaris	tRNA-Gln-TTG-2-2	chr35	24986544	24986616	-	5	-22	66.9	1.054833333	7	0.010362694	0.179425837	-2.79945	1	39	inactive	-0.633045763	True
Canis_lupus_familiaris	tRNA-Gln-TTG-3-1	chr35	24209613	24209685	-	5	-22	62.4	0.595638889	7	0.024611399	0.682926829	-1.67065	5	34	active	0.96141721	True
Canis_lupus_familiaris	tRNA-Gln-TTG-4-1	chrX	13471329	13471424	-	5	-15.1	56.1	0.074712329	27	0.018867925	0.411522634	-0.07955	0	6	inactive	-0.675023885	True
Canis_lupus_familiaris	tRNA-Glu-CTC-1-1	chr1	64654674	64654746	-	12	-26.4	73.2	1.212777778	7	0.077720207	0.969529086	-3.6352	0	17	active	0.986046377	True
Canis_lupus_familiaris	tRNA-Glu-CTC-1-2	chr16	13772758	13772830	+	12	-26.4	73.2	1.001875	6	0.063471503	0.768542615	-3.82065	1	46	active	0.987520092	True
Canis_lupus_familiaris	tRNA-Glu-CTC-1-3	chr17	58821760	58821832	+	12	-26.4	73.2	1.376833333	5	0.031088083	0.622222222	-3.77155	3	31	active	0.987706816	True
Canis_lupus_familiaris	tRNA-Glu-CTC-1-4	chr38	21089726	21089798	-	12	-26.4	73.2	0.179	41	0.125647668	0.996376812	0.14535	7	21	active	0.842912173	False
Canis_lupus_familiaris	tRNA-Glu-CTC-1-5	chr38	21096011	21096083	+	12	-26.4	73.2	0.185097222	41	0.124352332	0.979562614	0.1472	10	21	active	0.775608539	False
Canis_lupus_familiaris	tRNA-Glu-CTC-1-6	chr38	21103473	21103545	+	12	-26.4	73.2	0.185097222	41	0.124352332	0.979562614	0.0878	12	21	active	0.775608539	False
Canis_lupus_familiaris	tRNA-Glu-CTC-1-7	chr38	21110884	21110956	+	12	-26.4	73.2	0.185097222	41	0.125647668	0.991565257	0.0878	9	22	active	0.774153993	False
Canis_lupus_familiaris	tRNA-Glu-CTC-2-1	chr6	23302435	23302508	-	12	-12.1	72.9	0	351	0.001293661	0	0.06625	0	50	inactive	-0.962652318	True
Canis_lupus_familiaris	tRNA-Glu-CTC-3-1	chr31	15884689	15884762	+	12	-11.3	61.2	-0.022876712	18	0.005174644	0.149190111	0.09155	0	0	inactive	-0.935777148	True
Canis_lupus_familiaris	tRNA-Glu-CTC-4-1	chr34	4011738	4011811	-	12	-19.3	58.2	-0.120136986	134	0.03622251	0.640060241	-0.1331	0	36	inactive	-0.524024208	True
Canis_lupus_familiaris	tRNA-Glu-CTC-5-1	chr14	22842065	22842138	+	12	-13.5	56.8	-0.066958904	23	0.003880983	0	-0.16745	0	12	inactive	-0.95714071	True
Canis_lupus_familiaris	tRNA-Glu-CTC-6-1	chrX	109567253	109567326	-	12	-15.5	53.2	-0.15409589	129	0.005174644	0.064468595	-0.04505	0	42	inactive	-0.935669314	True
Canis_lupus_familiaris	tRNA-Glu-TTC-1-1	chr38	21119707	21119779	+	10	-26.4	73.2	0.244888889	8	0.037564767	0.278773397	-2.23595	5	19	active	0.894887407	True
Canis_lupus_familiaris	tRNA-Glu-TTC-1-2	chr38	21120344	21120416	-	10	-26.4	73.2	0.134861111	5	0.044041451	0.486631016	-2.46655	4	19	active	0.983003021	True
Canis_lupus_familiaris	tRNA-Glu-TTC-2-1	chr17	58900716	58900788	+	10	-26.4	68.7	0.262166667	5	0.112694301	0.777356446	-0.73425	5	10	active	0.944880558	True
Canis_lupus_familiaris	tRNA-Glu-TTC-2-2	chr17	58916975	58917047	-	10	-26.4	68.7	0.249486111	5	0.107512953	0.737639553	-0.73255	5	10	active	0.945521224	True
Canis_lupus_familiaris	tRNA-Glu-TTC-2-3	chr17	59074065	59074137	+	10	-26.4	68.7	-0.250680556	22	0.051813472	1.127281403	-1.9301	2	36	active	0.931607186	True
Canis_lupus_familiaris	tRNA-Glu-TTC-3-1	chr22	9565991	9566063	+	10	-24.8	70.4	1.586319444	8	0.120466321	1.041036499	-1.29645	0	17	active	0.922557798	True
Canis_lupus_familiaris	tRNA-Glu-TTC-3-2	chr25	19032409	19032481	+	10	-24.8	70.4	0.759847222	10	0.058290155	0.841472577	-2.52355	0	23	active	0.987108484	True
Canis_lupus_familiaris	tRNA-Glu-TTC-4-1	chr3	34576363	34576435	+	10	-24.8	68.9	1.457652778	8	0.066062176	0.926164967	-4.0151	0	6	active	0.982659396	True
Canis_lupus_familiaris	tRNA-Glu-TTC-5-1	chr22	6107147	6107219	+	10	-26.7	71.2	1.690763889	9	0.10492228	1.173541963	-3.97205	0	30	active	0.982088108	True
Canis_lupus_familiaris	tRNA-Glu-TTC-6-1	chr9	41915491	41915564	+	10	-10.3	69.5	0.085876712	351	0.01164295	0.133231823	-0.3018	0	13	inactive	-0.905733474	True
Canis_lupus_familiaris	tRNA-Gly-CCC-1-1	chr17	59080576	59080647	-	6	-26.4	79.3	0.274774648	6	0.028534371	0.20109164	-0.7494375	1	36	active	0.663153889	True
Canis_lupus_familiaris	tRNA-Gly-CCC-2-1	chr17	58908247	58908318	-	6	-24.8	79	0.274774648	16	0.054474708	0.709939148	-0.3665	3	10	active	0.910978758	False
Canis_lupus_familiaris	tRNA-Gly-CCC-2-2	chr17	58909455	58909526	+	6	-24.8	79	0.278042254	16	0.054474708	0.909090909	-0.33455	4	10	active	0.910931699	False
Canis_lupus_familiaris	tRNA-Gly-CCC-3-1	chr6	39931623	39931694	+	6	-31.4	75.1	1.474676056	4	0.114137484	1.023391813	-4.53915	0	168	active	0.969200603	True
Canis_lupus_familiaris	tRNA-Gly-CCC-3-2	chr10	68799173	68799244	-	6	-31.4	75.1	1.32643662	6	0.054474708	0.537909836	-3.57845	0	52	active	0.988566947	True
Canis_lupus_familiaris	tRNA-Gly-CCC-4-1	chr4	61810003	61810076	-	6	-12.9	52.8	-0.088410959	25	0.002587322	0	-0.2559	0	9	inactive	-0.921462567	True
Canis_lupus_familiaris	tRNA-Gly-GCC-1-1	chr5	32948627	32948698	+	11	-26.4	81	1.033549296	12	0.047989624	0.479306147	-3.22185	6	99	active	0.984013069	True
Canis_lupus_familiaris	tRNA-Gly-GCC-1-2	chr5	76281228	76281299	-	11	-26.4	81	1.023901408	9	0.076523995	0.990226337	-4.09345	0	82	active	0.985601653	True
Canis_lupus_familiaris	tRNA-Gly-GCC-1-3	chr5	76718671	76718742	-	11	-26.4	81	0.909704225	12	0.019455253	0.283564815	-0.4321	2	47	active	0.582715629	True
Canis_lupus_familiaris	tRNA-Gly-GCC-1-4	chr5	76726482	76726553	+	11	-26.4	81	1.399816901	9	0.058365759	0.505694374	-0.7817	2	49	active	0.975641913	True
Canis_lupus_familiaris	tRNA-Gly-GCC-1-5	chr5	76727750	76727821	+	11	-26.4	81	1.332619718	11	0.035019455	0.591216216	0.19405	2	49	active	0.920852546	True
Canis_lupus_familiaris	tRNA-Gly-GCC-1-6	chr35	25067172	25067243	-	11	-26.4	81	1.195492958	13	0.058365759	0.712663482	-3.7088	1	27	active	0.988337237	True
Canis_lupus_familiaris	tRNA-Gly-GCC-1-7	chr36	2609179	2609250	-	11	-26.4	81	1.084830986	2	0.118028534	0.938765182	-0.22675	1	24	active	0.927438807	True
Canis_lupus_familiaris	tRNA-Gly-GCC-2-1	chr38	21092515	21092586	-	11	-28.8	80.9	0.04171831	13	0.121919585	0.930656934	-0.34455	8	21	active	0.734156204	False
Canis_lupus_familiaris	tRNA-Gly-GCC-2-2	chr38	21099860	21099931	-	11	-28.8	80.9	0.04171831	13	0.124513619	0.930656934	-0.34455	12	19	active	0.734156204	False
Canis_lupus_familiaris	tRNA-Gly-GCC-2-3	chr38	21107335	21107406	-	11	-28.8	80.9	0.04171831	13	0.124513619	0.942028986	-0.34455	8	21	active	0.734156204	False
Canis_lupus_familiaris	tRNA-Gly-GCC-3-1	chr38	21079533	21079604	+	11	-17.3	62.1	1.189478873	20	0.031128405	28	-2.55015	3	15	active	0.889475303	True
Canis_lupus_familiaris	tRNA-Gly-TCC-1-1	chr5	33028177	33028249	+	10	-25.1	73.8	1.129916667	4	0.07253886	0.719585233	-3.0387	6	124	active	0.988586714	True
Canis_lupus_familiaris	tRNA-Gly-TCC-1-2	chr17	58823830	58823902	+	10	-25.1	73.8	1.362458333	14	0.041450777	0.675438596	-2.51575	3	30	active	0.988721178	True
Canis_lupus_familiaris	tRNA-Gly-TCC-1-3	chr38	21071016	21071088	-	10	-25.1	73.8	1.007166667	3	0.095854922	1.159132307	-2.8052	3	15	active	0.98563412	True
Canis_lupus_familiaris	tRNA-Gly-TCC-1-4	chr38	21090117	21090189	-	10	-25.1	73.8	0.232194444	11	0.128238342	0.962250185	0.10285	8	21	active	0.788176484	False
Canis_lupus_familiaris	tRNA-Gly-TCC-1-5	chr38	21095622	21095694	+	10	-25.1	73.8	0.231972222	11	0.126943005	0.952530486	0.0395	10	21	active	0.788176484	False
Canis_lupus_familiaris	tRNA-Gly-TCC-1-6	chr38	21103084	21103156	+	10	-25.1	73.8	0.231972222	11	0.125647668	1.011904762	0.0395	11	21	active	0.788176484	False
Canis_lupus_familiaris	tRNA-Gly-TCC-1-7	chr38	21110495	21110567	+	10	-25.1	73.8	0.231972222	11	0.128238342	0.962504627	0.0395	9	22	active	0.786721938	False
Canis_lupus_familiaris	tRNA-Gly-TCC-2-1	chr19	15617913	15617985	+	10	-25.1	73.8	0	25	0.009067358	0.240798074	-0.70915	0	3	inactive	-0.853193576	True
Canis_lupus_familiaris	tRNA-Gly-TCC-2-2	chr20	55036898	55036970	-	10	-25.1	73.8	0.984819444	14	0.101036269	0.888212156	-3.9925	1	46	active	0.98570381	True
Canis_lupus_familiaris	tRNA-Gly-TCC-3-1	chr27	31865306	31865378	-	10	-24	72.9	0	233	0.005181347	0.265957447	-0.09725	0	34	inactive	-0.904416435	True
Canis_lupus_familiaris	tRNA-His-GTG-1-1	chr17	58824672	58824744	+	8	-25.5	60.1	1.350902778	27	0.077720207	0.900735294	-1.08665	3	30	active	0.980248087	True
Canis_lupus_familiaris	tRNA-His-GTG-1-2	chr17	58898130	58898202	+	8	-25.5	60.1	0.231125	28	0.089378238	0.851892418	-0.9929	3	12	active	0.970309987	False
Canis_lupus_familiaris	tRNA-His-GTG-1-3	chr17	58919482	58919554	-	8	-25.5	60.1	0.184194444	28	0.089378238	0.848484848	-0.9091	4	10	active	0.966378759	False
Canis_lupus_familiaris	tRNA-His-GTG-1-4	chr17	58994570	58994642	-	8	-25.5	60.1	0.184194444	9	0.049222798	0.943627451	-0.9091	3	19	active	0.974790415	True
Canis_lupus_familiaris	tRNA-His-GTG-1-5	chr30	11615415	11615487	-	8	-25.5	60.1	1.566722222	34	0.067357513	0.760685825	0.50465	2	70	active	0.961053456	True
Canis_lupus_familiaris	tRNA-His-GTG-1-6	chr30	11616978	11617050	-	8	-25.5	60.1	1.672708333	34	0.082901554	0.919976636	-0.1098	2	66	active	0.962868666	True
Canis_lupus_familiaris	tRNA-His-GTG-1-7	chr30	11617685	11617757	+	8	-25.5	60.1	1.553194444	30	0.081606218	0.911458333	0.111	2	65	active	0.961821664	True
Canis_lupus_familiaris	tRNA-His-GTG-1-8	chr35	24565384	24565456	+	8	-25.5	60.1	0.620930556	4	0.042746114	0.918635171	-0.99525	2	26	active	0.979839211	True
Canis_lupus_familiaris	tRNA-Ile-AAT-1-1	chr35	24432875	24432949	+	8	-26.2	84.2	0.236635135	7	0.032299742	0.751817581	-1.11465	2	27	active	0.970688642	True
Canis_lupus_familiaris	tRNA-Ile-AAT-2-1	chr5	33001724	33001798	+	8	-25.5	81.2	1.667027027	12	0.042635659	0.934466019	-5.556	3	125	active	0.988753601	True
Canis_lupus_familiaris	tRNA-Ile-AAT-2-2	chr5	33032730	33032804	-	8	-25.5	81.2	1.371391892	14	0.059431525	0.554265203	-4.1864	6	134	active	0.988586714	True
Canis_lupus_familiaris	tRNA-Ile-AAT-2-3	chr8	70280715	70280789	+	8	-25.5	81.2	1.036891892	14	0.071059432	0.889615105	-3.182	0	33	active	0.984515452	True
Canis_lupus_familiaris	tRNA-Ile-AAT-2-4	chr35	24320738	24320812	+	8	-25.5	81.2	1.437486486	8	0.058139535	0.751173709	-3.4931	3	34	active	0.989082184	True
Canis_lupus_familiaris	tRNA-Ile-AAT-2-5	chr35	24581284	24581358	-	8	-25.5	81.2	0.284445946	8	0.111111111	0.919524336	-0.7529	2	25	active	0.950128539	True
Canis_lupus_familiaris	tRNA-Ile-AAT-3-1	chr35	24933750	24933824	+	8	-25.5	81.2	0.363216216	12	0.0374677	0.532094595	-2.22855	4	25	active	0.984214345	True
Canis_lupus_familiaris	tRNA-Ile-AAT-4-1	chr35	24627986	24628060	+	8	-28.1	77.1	0.051027027	12	0.016795866	0.289975145	-0.59545	0	31	inactive	-0.711135698	True
Canis_lupus_familiaris	tRNA-Ile-TAT-1-1	chr1	113812477	113812570	+	5	-29.6	73.8	1.526121622	4	0.066834805	0.807453416	0.0346	0	134	active	0.964979787	True
Canis_lupus_familiaris	tRNA-Ile-TAT-2-1	chr10	45399190	45399283	+	5	-30.2	73.2	1.480243243	6	0.141235813	1.057140028	0.2822	0	36	active	0.884420835	True
Canis_lupus_familiaris	tRNA-Ile-TAT-2-2	chr35	24457610	24457704	+	5	-33.3	73.1	0.852162162	3	0.069269521	0.695180085	-1.6481	1	24	active	0.98227963	True
Canis_lupus_familiaris	tRNA-Ile-TAT-2-3	chr35	24922108	24922202	+	5	-33.3	73.1	1.046027027	2	0.102015113	1.012536162	-0.82145	0	16	active	0.973337043	True
Canis_lupus_familiaris	tRNA-Ile-TAT-3-1	chr35	25667694	25667786	+	5	-31.7	71.4	-0.039324324	1	0.085858586	0.938405797	-1.00685	0	16	active	0.877498882	True
Canis_lupus_familiaris	tRNA-iMet-CAT-1-1	chr7	43402882	43402954	-	17	-26.1	60.4	1.655902778	14	0.054404145	0.89249286	-3.6092	0	103	active	0.987694491	True
Canis_lupus_familiaris	tRNA-iMet-CAT-1-2	chr35	24195408	24195480	+	17	-26.1	60.4	1.150972222	4	0.045336788	0.911854103	-4.43215	2	43	active	0.98813608	True
Canis_lupus_familiaris	tRNA-iMet-CAT-1-3	chr35	24211744	24211816	-	17	-26.1	60.4	1.114861111	11	0.031088083	0.56492109	-2.88065	5	35	active	0.98698293	True
Canis_lupus_familiaris	tRNA-iMet-CAT-1-4	chr35	24882999	24883071	-	17	-26.1	60.4	0.803277778	7	0.059585492	0.83880703	-2.1425	3	6	active	0.980591442	True
Canis_lupus_familiaris	tRNA-iMet-CAT-2-1	chr35	24845594	24845666	+	17	-26.1	60.2	0.095319444	351	0.046632124	0.321691176	-0.6887	2	9	active	0.552160836	True
Canis_lupus_familiaris	tRNA-iMet-CAT-2-2	chr35	24977368	24977440	+	17	-26.1	60.2	-0.080263889	4	0.047927461	0.708130386	-3.7073	1	36	active	0.922163119	True
Canis_lupus_familiaris	tRNA-iMet-CAT-2-3	chr35	25066744	25066816	-	17	-26.1	60.2	1.278402778	12	0.03238342	0.755813953	-3.83355	1	27	active	0.98761662	True
Canis_lupus_familiaris	tRNA-iMet-CAT-3-1	chr35	24684368	24684441	-	17	-26	53.2	-0.208638889	30	0.027166882	0.817247821	-1.9458	1	36	active	0.654462207	True
Canis_lupus_familiaris	tRNA-Leu-AAG-1-1	chr6	23358707	23358789	-	4	-30.7	74.8	1.66852439	6	0.099744246	1.064814815	-4.5483	0	55	active	0.97396949	True
Canis_lupus_familiaris	tRNA-Leu-AAG-1-2	chr15	17964802	17964884	-	4	-30.7	74.8	0.382926829	8	0.033248082	0.450762829	-1.47175	1	30	active	0.9803046	True
Canis_lupus_familiaris	tRNA-Leu-AAG-1-3	chr35	25944033	25944115	-	4	-30.7	74.8	0.71495122	5	0.078005115	0.814970468	-2.32315	4	27	active	0.98207242	True
Canis_lupus_familiaris	tRNA-Leu-AAG-1-4	chr35	25964303	25964385	+	4	-30.7	74.8	0.325219512	4	0.145780051	1.174496644	-0.32635	0	26	active	0.877219417	True
Canis_lupus_familiaris	tRNA-Leu-CAA-1-1	chr35	25940177	25940282	+	4	-40.4	77.3	0.74397619	5	0.080745342	0.856421186	-2.2275	3	26	active	0.973173734	True
Canis_lupus_familiaris	tRNA-Leu-CAA-2-1	chr35	25897423	25897527	-	4	-40	75.7	1.250797619	5	0.115671642	0.943791946	-2.42495	0	20	active	0.962741561	True
Canis_lupus_familiaris	tRNA-Leu-CAA-3-1	chr35	24891355	24891461	-	4	-43.7	73.6	0.707238095	7	0.068238213	0.804062632	-1.1726	3	7	active	0.95915959	True
Canis_lupus_familiaris	tRNA-Leu-CAA-4-1	chr16	13772417	13772523	+	4	-35.3	73.4	0.909988095	6	0.114143921	0.982004644	-2.0335	1	46	active	0.960937226	True
Canis_lupus_familiaris	tRNA-Leu-CAG-1-1	chr2	59085884	59085967	+	6	-35.7	78.2	1.487457831	7	0.111111111	1.141955499	-4.90055	1	27	active	0.96852989	True
Canis_lupus_familiaris	tRNA-Leu-CAG-1-2	chr35	24294838	24294921	+	6	-35.7	78.2	1.408542169	5	0.051085568	0.789760349	-4.224	3	31	active	0.984126565	True
Canis_lupus_familiaris	tRNA-Leu-CAG-1-3	chr38	21094084	21094167	-	6	-35.7	78.2	0	8	0.151979566	1.109083925	0	10	21	active	0.670418125	False
Canis_lupus_familiaris	tRNA-Leu-CAG-1-4	chr38	21108919	21109002	-	6	-35.7	78.2	0	8	0.118773946	1.892915089	0	8	22	active	0.708145136	False
Canis_lupus_familiaris	tRNA-Leu-CAG-2-1	chr2	59086257	59086340	-	6	-32.8	77.3	1.151783133	9	0.072796935	1.085434174	-2.23275	1	27	active	0.984500101	True
Canis_lupus_familiaris	tRNA-Leu-CAG-2-2	chr38	21071612	21071695	+	6	-32.8	77.3	1.06413253	8	0.058748404	1.137524376	-3.98205	3	15	active	0.987805027	True
Canis_lupus_familiaris	tRNA-Leu-TAA-1-1	chr1	35666270	35666352	+	3	-31	87.3	1.350987805	9	0.140664962	1.216216216	-1.8585	0	27	active	0.871692001	True
Canis_lupus_familiaris	tRNA-Leu-TAA-2-1	chr35	24966794	24966877	-	3	-35.9	90.7	0.669192771	7	0.045977011	0.710702341	-2.3561	0	32	active	0.927623943	True
Canis_lupus_familiaris	tRNA-Leu-TAA-3-1	chr18	37205153	37205236	-	3	-27.9	79.5	0.122361446	5	0.052362708	0.874190564	-3.409	5	27	active	0.944814912	True
Canis_lupus_familiaris	tRNA-Leu-TAG-1-1	chr5	32943095	32943177	-	4	-33.3	75.2	1.654719512	8	0.067774936	0.896	-2.62995	4	95	active	0.987384884	True
Canis_lupus_familiaris	tRNA-Leu-TAG-2-1	chr15	17969760	17969842	-	4	-33.7	74.9	0.078939024	3	0.083120205	0.850202429	-0.83175	1	30	active	0.919090156	True
Canis_lupus_familiaris	tRNA-Leu-TAG-3-1	chr15	17923253	17923335	+	4	-29.7	70.9	0.983695122	8	0.066496164	0.880681818	-2.08195	5	28	active	0.979695803	True
Canis_lupus_familiaris	tRNA-Leu-TAG-4-1	chr6	23444000	23444082	+	4	-30.3	65	1.51104878	18	0.056265985	1.100628931	-3.18865	0	62	active	0.987059099	True
Canis_lupus_familiaris	tRNA-Lys-CTT-1-1	chr6	38021376	38021449	-	38	-28	87.8	-0.7903	5	0.056921087	0.310283688	-0.879	6	51	active	0.664932423	True
Canis_lupus_familiaris	tRNA-Lys-CTT-1-2	chr11	405029	405102	+	38	-28	87.8	1.171917808	9	0.031047865	0.768535262	-2.67835	4	33	active	0.913979847	True
Canis_lupus_familiaris	tRNA-Lys-CTT-1-3	chr11	414332	414405	-	38	-28	87.8	0.273876712	8	0.046571798	0.77	-3.65855	4	33	active	0.931393983	True
Canis_lupus_familiaris	tRNA-Lys-CTT-1-4	chr17	58825638	58825711	+	38	-28	87.8	1.193958904	8	0.055627426	0.823705605	-3.97125	3	30	active	0.932229694	True
Canis_lupus_familiaris	tRNA-Lys-CTT-10-1	chr24	16376157	16376230	+	38	-12.4	55.7	-0.104410959	158	0.003880983	0.051713948	0.0143	0	16	inactive	-0.957847024	True
Canis_lupus_familiaris	tRNA-Lys-CTT-11-1	chr14	40036308	40036381	-	38	-19	64.9	-0.009369863	91	0.007761966	0.23923445	-0.00925	0	13	inactive	-0.958645132	True
Canis_lupus_familiaris	tRNA-Lys-CTT-12-1	chr9	36331779	36331852	+	38	-15.3	64.3	-0.010424658	278	0.01164295	0.307017544	-0.36235	0	63	inactive	-0.957418671	True
Canis_lupus_familiaris	tRNA-Lys-CTT-13-1	chr37	11212486	11212559	+	38	-10.8	60.1	-0.005561644	326	0.006468305	0.273152966	0.00995	0	39	inactive	-0.959837387	True
Canis_lupus_familiaris	tRNA-Lys-CTT-14-1	chr1	118052480	118052553	-	38	-12.4	57	0.012917808	22	0.019404916	0.283975659	-0.12775	0	23	inactive	-0.845254501	True
Canis_lupus_familiaris	tRNA-Lys-CTT-15-1	chr20	46436461	46436534	-	38	-8.6	54.8	-0.024068493	351	0.002587322	0	-0.709444444	0	28	inactive	-0.973803461	True
Canis_lupus_familiaris	tRNA-Lys-CTT-16-1	chr17	25178226	25178299	+	38	-15.4	60.6	0	159	0.003880983	0	0	0	3	inactive	-0.961421008	True
Canis_lupus_familiaris	tRNA-Lys-CTT-17-1	chr33	28187306	28187379	-	38	-22.4	65.3	0.019547945	24	0.018111255	0.14084507	-0.2952	0	16	inactive	-0.815793477	True
Canis_lupus_familiaris	tRNA-Lys-CTT-18-1	chr15	21998121	21998194	-	38	-9.9	55.3	0.065315068	10	0.002587322	0.073313783	-0.25115	0	8	inactive	-0.952190392	True
Canis_lupus_familiaris	tRNA-Lys-CTT-19-1	chr6	55654415	55654488	+	38	-13.7	60.7	0.052589041	351	0.002587322	0.133485889	-0.1713	0	9	inactive	-0.972816014	True
Canis_lupus_familiaris	tRNA-Lys-CTT-2-1	chr6	38045328	38045401	-	38	-25.1	86.3	0.305191781	5	0.046571798	0.750871547	-2.5723	5	50	active	0.944493641	True
Canis_lupus_familiaris	tRNA-Lys-CTT-20-1	chr12	3472827	3472900	+	38	-19.2	57.9	0.035547945	24	0.018111255	0.295822265	-0.00795	0	16	inactive	-0.865364752	True
Canis_lupus_familiaris	tRNA-Lys-CTT-21-1	chr11	45039285	45039358	+	38	-18.5	62.6	0.063890411	22	0.005174644	0.071721311	0.07595	0	16	inactive	-0.950227733	True
Canis_lupus_familiaris	tRNA-Lys-CTT-22-1	chr23	11461347	11461420	-	38	-17.5	71.8	0.069342466	38	0.007761966	0.184339888	0.04155	0	16	inactive	-0.962297041	True
Canis_lupus_familiaris	tRNA-Lys-CTT-23-1	chr32	16988550	16988623	+	38	-15.8	59.8	-0.010808219	49	0.005174644	0.129485757	-0.24845	0	11	inactive	-0.968034581	True
Canis_lupus_familiaris	tRNA-Lys-CTT-24-1	chr9	36091813	36091886	+	38	-16.6	55.4	-0.073589041	351	0.005174644	0.069430669	-0.27885	0	23	inactive	-0.98237489	True
Canis_lupus_familiaris	tRNA-Lys-CTT-25-1	chr27	14596455	14596528	+	38	-13	51.6	-0.057136986	203	0.006468305	0.317028986	0.01135	0	4	inactive	-0.917010989	True
Canis_lupus_familiaris	tRNA-Lys-CTT-26-1	chr12	3621566	3621639	+	38	-12.9	54.7	0.020479452	62	0.01164295	0.072150072	-0.2579	0	9	inactive	-0.960936232	True
Canis_lupus_familiaris	tRNA-Lys-CTT-27-1	chr10	47235601	47235674	+	38	-14.6	57.7	0.013643836	199	0.007761966	0.252403846	-0.42555	0	10	inactive	-0.971712411	True
Canis_lupus_familiaris	tRNA-Lys-CTT-28-1	chr7	7358108	7358181	+	38	-11.8	55.6	-0.026054795	63	0.002587322	0.091264668	-0.4315	0	0	inactive	-0.955333784	True
Canis_lupus_familiaris	tRNA-Lys-CTT-29-1	chr10	16921464	16921537	+	38	-22.7	55.6	-0.087917808	351	0.02457956	0.333333333	-0.0705	0	114	inactive	-0.802681728	True
Canis_lupus_familiaris	tRNA-Lys-CTT-3-1	chr6	38052839	38052912	+	38	-28.6	88.1	0.55139726	4	0.077619664	0.884421006	-3.6187	4	51	active	0.941901904	True
Canis_lupus_familiaris	tRNA-Lys-CTT-30-1	chr37	5370037	5370110	+	38	-19.2	62.6	0.003849315	42	0.006468305	0.079257246	-0.23915	0	5	inactive	-0.949889904	True
Canis_lupus_familiaris	tRNA-Lys-CTT-31-1	chr6	2088794	2088867	+	38	-7.6	50.9	0	181	0	0	-0.1004	0	5	inactive	-0.93503693	True
Canis_lupus_familiaris	tRNA-Lys-CTT-32-1	chr6	20428570	20428643	+	38	-15.9	58.6	-0.206150685	25	0.016817594	0.38961039	-0.42975	0	7	inactive	-0.837476096	True
Canis_lupus_familiaris	tRNA-Lys-CTT-33-1	chr18	53994485	53994558	+	38	-9.5	58.8	-0.129438356	261	0.010349288	0.247568523	0.14105	0	163	inactive	-0.934851841	True
Canis_lupus_familiaris	tRNA-Lys-CTT-34-1	chr33	3297237	3297310	+	38	-14.7	53.2	0.115219178	35	0.009055627	0.373931624	-0.01985	0	1	inactive	-0.878129242	True
Canis_lupus_familiaris	tRNA-Lys-CTT-4-1	chr3	58153640	58153713	-	38	-30.1	88	0.467246575	7	0.063389392	0.82708605	-2.42745	0	55	active	0.930973331	True
Canis_lupus_familiaris	tRNA-Lys-CTT-4-2	chr8	33612481	33612554	-	38	-30.1	88	1.341589041	8	0.029754204	0.418660287	-3.7523	0	51	active	0.881466701	True
Canis_lupus_familiaris	tRNA-Lys-CTT-5-1	chr6	38030088	38030161	-	38	-25.8	84.2	0.253452055	9	0.054333765	0.688729875	-1.6025	6	47	active	0.939239332	True
Canis_lupus_familiaris	tRNA-Lys-CTT-6-1	chr6	38040291	38040364	-	38	-30.5	89.3	0.343958904	6	0.025873221	0.418478261	-1.7916	4	48	active	0.873622521	True
Canis_lupus_familiaris	tRNA-Lys-CTT-7-1	chr9	42263378	42263451	+	38	-15	70	0.117534247	121	0.010349288	0.391236307	-0.196	0	23	inactive	-0.860116879	True
Canis_lupus_familiaris	tRNA-Lys-CTT-8-1	chr20	41691805	41691878	+	38	-14	73.9	0.089616438	9	0.016817594	0.537825059	-0.04525	0	28	inactive	-0.559877361	True
Canis_lupus_familiaris	tRNA-Lys-CTT-9-1	chr26	16756707	16756780	+	38	-17	63.4	-0.047630137	230	0.006468305	0	-0.22715	0	21	inactive	-0.967161097	True
Canis_lupus_familiaris	tRNA-Lys-TTT-1-1	chr5	32941795	32941868	+	10	-27.5	87.8	1.675424658	5	0.064683053	0.884697647	-5.00965	4	95	active	0.988314926	True
Canis_lupus_familiaris	tRNA-Lys-TTT-1-2	chr18	37198785	37198858	+	10	-27.5	87.8	1.311082192	9	0.075032342	1.024590164	-3.97105	6	32	active	0.988275837	True
Canis_lupus_familiaris	tRNA-Lys-TTT-1-3	chr18	37201983	37202056	-	10	-27.5	87.8	0.985767123	7	0.051746442	0.546875	-3.44005	6	30	active	0.986946631	True
Canis_lupus_familiaris	tRNA-Lys-TTT-1-4	chr35	24318049	24318122	-	10	-27.5	87.8	0.628013699	8	0.009055627	0.116666667	-0.43855	3	34	inactive	-0.593686037	True
Canis_lupus_familiaris	tRNA-Lys-TTT-1-5	chr38	1049399	1049472	+	10	-27.5	87.8	0.427394366	8	0.021992238	0.563607085	-3.08655	1	47	active	0.979744912	True
Canis_lupus_familiaris	tRNA-Lys-TTT-1-6	chr38	1049750	1049823	-	10	-27.5	87.8	1.402616438	23	0.021992238	0.521091811	-3.4621	1	47	active	0.982371288	True
Canis_lupus_familiaris	tRNA-Lys-TTT-2-1	chr35	24870595	24870668	+	10	-25.2	84.3	0.292424658	7	0.032341527	0.889967638	-1.34065	1	7	active	0.965048276	True
Canis_lupus_familiaris	tRNA-Lys-TTT-2-2	chr35	24881755	24881828	-	10	-25.2	84.3	0.238506849	11	0.03622251	0.714362445	-1.3697	3	6	active	0.971605976	True
Canis_lupus_familiaris	tRNA-Lys-TTT-3-1	chr35	24690365	24690438	-	10	-28	82.9	0.367643836	69	0.002587322	0	-3.30395	1	35	active	0.561373572	True
Canis_lupus_familiaris	tRNA-Lys-TTT-4-1	chr7	58255337	58255410	+	10	-11.9	57	-0.079972603	75	0.01164295	0.322402358	-0.1404	0	12	inactive	-0.899439726	True
Canis_lupus_familiaris	tRNA-Met-CAT-1-1	chr35	25944671	25944744	+	17	-25.8	76.7	1.176424658	5	0.063389392	0.828402367	-2.06715	4	27	active	0.985342517	True
Canis_lupus_familiaris	tRNA-Met-CAT-2-1	chr13	21547524	21547597	-	17	-25	78	1.019123288	6	0.133247089	1.021985572	-1.93325	0	37	active	0.938081868	True
Canis_lupus_familiaris	tRNA-Met-CAT-3-1	chr35	25951357	25951430	-	17	-25.8	77.4	1.079178082	6	0.04915912	0.964187328	-2.90865	2	27	active	0.988620786	True
Canis_lupus_familiaris	tRNA-Met-CAT-4-1	chr35	24415814	24415887	+	17	-24	81.2	0.455369863	2	0.054333765	0.314253648	-3.0353	0	26	active	0.861234738	True
Canis_lupus_familiaris	tRNA-Met-CAT-5-1	chr16	35836523	35836596	+	17	-26.7	83.3	0.263479452	6	0.007761966	0	-0.7564	0	22	inactive	-0.741438003	True
Canis_lupus_familiaris	tRNA-Met-CAT-6-1	chr13	20079884	20079957	+	17	-23.6	65.7	0.27869863	7	0.014230272	0.594135802	-1.05515	0	0	active	0.596009688	True
Canis_lupus_familiaris	tRNA-Met-CAT-7-1	chr15	35113295	35113368	+	17	-16	56.7	-0.194205479	32	0.003880983	0	-0.3288	0	28	inactive	-0.927175432	True
Canis_lupus_familiaris	tRNA-Met-CAT-8-1	chr14	47375492	47375565	+	17	-17.2	55.7	0	279	0.012936611	0.297787862	-0.20455	0	5	inactive	-0.949020188	True
Canis_lupus_familiaris	tRNA-Met-CAT-9-1	chr7	40189739	40189812	-	17	-17.2	60	-0.164808219	240	0.005174644	0.084663764	-0.28515	0	24	inactive	-0.952050253	True
Canis_lupus_familiaris	tRNA-Phe-GAA-1-1	chr18	37195014	37195087	+	10	-21.9	88.9	0.293534247	4	0.064683053	0.635418386	-3.89945	3	35	active	0.986933001	True
Canis_lupus_familiaris	tRNA-Phe-GAA-1-2	chr18	37200969	37201042	+	10	-21.9	88.9	1.214328767	3	0.078913325	0.457383476	-2.9505	6	31	active	0.986144484	True
Canis_lupus_familiaris	tRNA-Phe-GAA-1-3	chr22	45354610	45354683	-	10	-21.9	88.9	1.118972603	10	0.131953428	0.949957591	-2.1162	0	25	active	0.938849048	True
Canis_lupus_familiaris	tRNA-Phe-GAA-1-4	chr26	4998183	4998256	+	10	-21.9	88.9	1.302506849	10	0.068564036	0.732026144	-2.67525	4	48	active	0.988549622	True
Canis_lupus_familiaris	tRNA-Phe-GAA-2-1	chr25	37618145	37618218	-	10	-20.4	86.1	0.36230137	3	0.010349288	0.184989429	-4.022684211	0	6	active	0.518862295	True
Canis_lupus_familiaris	tRNA-Phe-GAA-3-1	chr37	29978029	29978102	+	10	-20.5	84.9	0.320465753	3	0.012936611	0.287828947	-3.6714	0	11	active	0.549644227	True
Canis_lupus_familiaris	tRNA-Phe-GAA-4-1	chr35	25816216	25816289	+	10	-22	89.3	0.127	10	0.087968952	0.70128569	-0.74295	3	4	active	0.937490941	True
Canis_lupus_familiaris	tRNA-Phe-GAA-4-2	chr35	25816828	25816901	-	10	-22	89.3	0.142109589	10	0.078913325	0.656167979	-0.79635	3	4	active	0.953893688	True
Canis_lupus_familiaris	tRNA-Phe-GAA-5-1	chr20	57449230	57449303	+	10	-21.2	86.7	0.51169863	4	0.12160414	1.060606061	-1.00965	1	71	active	0.900933267	True
Canis_lupus_familiaris	tRNA-Phe-GAA-6-1	chr33	12221386	12221459	+	10	-11.7	68.1	?	7	0.005174644	0.066742944	?	0	4	inactive	-0.760737436	True
Canis_lupus_familiaris	tRNA-Pro-AGG-1-1	chr6	38020810	38020882	-	8	-29.5	70.2	0.538444444	3	0.06865285	0.747863248	-3.97765	5	52	active	0.987304033	True
Canis_lupus_familiaris	tRNA-Pro-AGG-1-2	chr6	38026089	38026161	-	8	-29.5	70.2	0.538444444	3	0.089378238	0.862794613	-3.95215	6	48	active	0.985246972	True
Canis_lupus_familiaris	tRNA-Pro-AGG-1-3	chr6	38045621	38045693	+	8	-29.5	70.2	0.284055556	4	0.069948187	0.735294118	-1.6847	5	50	active	0.980814538	True
Canis_lupus_familiaris	tRNA-Pro-AGG-1-4	chr7	30747721	30747793	+	8	-29.5	70.2	1.539611111	2	0.059585492	0.422297297	-4.10685	1	15	active	0.977465637	True
Canis_lupus_familiaris	tRNA-Pro-AGG-1-5	chr14	7858618	7858690	-	8	-29.5	70.2	1.477486111	3	0.015544041	0.154798762	-1.3551	0	100	inactive	-0.583318112	True
Canis_lupus_familiaris	tRNA-Pro-AGG-1-6	chr15	17916193	17916265	-	8	-29.5	70.2	0.994930556	2	0.097150259	1.024449036	-3.5289	3	29	active	0.985262804	True
Canis_lupus_familiaris	tRNA-Pro-AGG-1-7	chr21	22421064	22421136	-	8	-29.5	70.2	1.515875	3	0.095854922	0.944375259	-4.59635	1	14	active	0.985484837	True
Canis_lupus_familiaris	tRNA-Pro-AGG-1-8	chr35	24321797	24321869	+	8	-29.5	70.2	1.449777778	2	0.04015544	0.642201835	-4.0925	3	35	active	0.988749463	True
Canis_lupus_familiaris	tRNA-Pro-CGG-1-1	chr5	33029190	33029262	-	4	-29.5	70.2	1.483847222	7	0.126943005	0.998058488	-2.84385	6	128	active	0.933904361	True
Canis_lupus_familiaris	tRNA-Pro-CGG-1-2	chr6	38036835	38036907	-	4	-29.5	70.2	0.408708333	26	0.069948187	0.661375661	-1.2817	6	46	active	0.974925928	True
Canis_lupus_familiaris	tRNA-Pro-CGG-1-3	chr7	30748431	30748503	-	4	-29.5	70.2	1.213847222	4	0.111398964	1.015325671	-0.84925	1	14	active	0.975306108	True
Canis_lupus_familiaris	tRNA-Pro-CGG-2-1	chr35	24513745	24513817	+	4	-27.6	65.9	0.742333333	6	0.042746114	0.496031746	-2.49135	0	25	active	0.985770547	True
Canis_lupus_familiaris	tRNA-Pro-TGG-1-1	chr15	17927802	17927874	+	5	-29.5	74.9	0.372027778	15	0.126943005	1.072738219	-3.4588	4	28	active	0.933409614	True
Canis_lupus_familiaris	tRNA-Pro-TGG-2-1	chr6	38027543	38027615	-	5	-29.5	70.3	0.221680556	8	0.082901554	0.941040906	-1.0577	7	48	active	0.970672795	True
Canis_lupus_familiaris	tRNA-Pro-TGG-2-2	chr6	38051893	38051965	-	5	-29.5	70.3	0.875222222	2	0.06865285	0.630857967	-4.76315	3	50	active	0.987056948	True
Canis_lupus_familiaris	tRNA-Pro-TGG-3-1	chr21	22420763	22420835	+	5	-28.9	70.5	1.622375	3	0.088082902	0.925984252	-4.1931	1	14	active	0.984970473	True
Canis_lupus_familiaris	tRNA-Pro-TGG-4-1	chr11	388875	388947	-	5	-22.7	55.1	0.925013889	2	0.079015544	0.795454545	-4.0219	2	33	active	0.784503282	True
Canis_lupus_familiaris	tRNA-SeC-TCA-1-1	chr1	110084042	110084129	+	1	-37.1	146.9	1.493333333	11	0.034307497	0.762910798	-4.75525	0	63	active	0.944527609	True
Canis_lupus_familiaris	tRNA-Ser-AGA-1-1	chr5	33032211	33032293	-	10	-32.8	89.6	1.425195122	5	0.07544757	0.671504838	-4.84655	6	134	active	0.983639337	True
Canis_lupus_familiaris	tRNA-Ser-AGA-1-2	chr29	39875020	39875102	-	10	-32.8	89.6	?	30	0.157289003	1.005551227	?	0	7	active	0.910644362	True
Canis_lupus_familiaris	tRNA-Ser-AGA-1-3	chr35	24800433	24800515	+	10	-32.8	89.6	0.760768293	4	0.093350384	0.845518118	-1.6614	1	24	active	0.971984434	True
Canis_lupus_familiaris	tRNA-Ser-AGA-1-4	chr35	24816245	24816327	+	10	-32.8	89.6	0.590378049	8	0.069053708	0.875	-2.0696	3	15	active	0.983435239	True
Canis_lupus_familiaris	tRNA-Ser-AGA-1-5	chr35	24834974	24835056	+	10	-32.8	89.6	0.940621951	179	0.062659847	0.727272727	-2.68495	2	11	active	0.89328559	True
Canis_lupus_familiaris	tRNA-Ser-AGA-1-6	chr35	24847277	24847359	-	10	-32.8	89.6	0.938365854	173	0.061381074	0.710127029	-2.67805	3	8	active	0.904629556	True
Canis_lupus_familiaris	tRNA-Ser-AGA-2-1	chr35	24857355	24857437	-	10	-33.4	89.2	0.697317073	7	0.025575448	0.49082101	-1.62945	1	4	active	0.968675422	True
Canis_lupus_familiaris	tRNA-Ser-AGA-3-1	chr35	24809231	24809313	+	10	-30.8	76.8	0.141914634	5	0.063938619	0.626566416	-0.00845	3	21	active	0.925335869	True
Canis_lupus_familiaris	tRNA-Ser-AGA-4-1	chr2	33301116	33301198	+	10	-27.4	65.5	0	5	0.024296675	0.307017544	-0.2018	0	5	active	0.557203486	True
Canis_lupus_familiaris	tRNA-Ser-AGA-5-1	chr35	24840760	24840842	+	10	-16.4	55.9	0.924207317	4	0.006393862	0.079690346	-2.70855	3	10	inactive	-0.619906027	True
Canis_lupus_familiaris	tRNA-Ser-CGA-1-1	chr5	32956354	32956436	-	4	-34	95.1	1.596609756	7	0.094629156	0.988344148	-0.72995	2	99	active	0.972249356	True
Canis_lupus_familiaris	tRNA-Ser-CGA-2-1	chr35	24936443	24936525	-	4	-34	94	0.684426829	6	0.017902813	0	-1.7784	4	26	active	0.738854207	True
Canis_lupus_familiaris	tRNA-Ser-CGA-3-1	chr10	504154	504236	+	4	-29.8	89.6	1.6625	5	0.106138107	0.796963947	-0.8238	0	140	active	0.981177394	True
Canis_lupus_familiaris	tRNA-Ser-CGA-4-1	chr35	24595775	24595856	+	4	-32	83.8	0.708987654	11	0.011523688	0.227125243	-1.7236	1	24	active	0.557668811	True
Canis_lupus_familiaris	tRNA-Ser-GCT-1-1	chr18	50964122	50964204	-	8	-30.7	89.1	1.684317073	6	0.069053708	0.875	-2.49595	0	84	active	0.9881924	True
Canis_lupus_familiaris	tRNA-Ser-GCT-2-1	chr35	24660289	24660371	+	8	-30.4	89.7	0.095025	33	0.02685422	0.352315214	-2.554	1	30	active	0.931040449	True
Canis_lupus_familiaris	tRNA-Ser-GCT-3-1	chr5	33000979	33001061	+	8	-30.7	88.4	1.637512195	29	0.116368286	1.048344719	-3.81985	3	125	active	0.961858094	True
Canis_lupus_familiaris	tRNA-Ser-GCT-3-2	chr30	7753287	7753369	-	8	-30.7	88.4	1.616414634	8	0.047314578	1.019367992	-1.10505	0	41	active	0.983203031	True
Canis_lupus_familiaris	tRNA-Ser-GCT-3-3	chr35	24203181	24203263	-	8	-30.7	88.4	1.421402439	31	0.052429668	0.172413793	-4.15535	6	38	active	0.917960077	True
Canis_lupus_familiaris	tRNA-Ser-GCT-4-1	chr24	1364707	1364789	+	8	-29.3	86.7	0.072814815	27	0.020460358	0.571895425	-0.33965	0	9	active	0.732842282	True
Canis_lupus_familiaris	tRNA-Ser-GCT-5-1	chr35	24474030	24474112	-	8	-30.4	89	0.654658537	10	0.060102302	0.81300813	-2.302	0	22	active	0.984073467	True
Canis_lupus_familiaris	tRNA-Ser-GCT-6-1	chr35	24525282	24525364	+	8	-32.5	83.8	0.671682927	9	0.07544757	0.824760044	-2.254947368	0	22	active	0.979267805	True
Canis_lupus_familiaris	tRNA-Ser-TGA-1-1	chr35	24211266	24211348	-	3	-32.8	89.7	1.375987805	8	0.031969309	0.549968573	-3.3696	5	35	active	0.954059949	True
Canis_lupus_familiaris	tRNA-Ser-TGA-2-1	chr35	24820161	24820243	-	3	-32.2	86.8	0.151731707	1	0.028132992	0.420875421	-2.6112	3	14	active	0.945627013	True
Canis_lupus_familiaris	tRNA-Ser-TGA-3-1	chr4	19071751	19071833	+	3	-34.9	94	1.593707317	17	0.046035806	0.940649496	-2.4741	0	10	active	0.932761994	True
Canis_lupus_familiaris	tRNA-Sup-CTA-1-1	chr1	89656166	89656239	-	2	-24.5	64.4	-0.025767123	51	0.012936611	0.247175141	-0.3359	0	16	inactive	-0.875164879	True
Canis_lupus_familiaris	tRNA-Sup-CTA-2-1	chr2	35872769	35872842	-	2	-13.9	53.1	?	351	0	0	?	0	88	inactive	-0.824378889	True
Canis_lupus_familiaris	tRNA-Thr-AGT-1-1	chr35	25818226	25818300	+	8	-27	83.9	-0.134056338	9	0.067183463	0.944952752	-1.79655	3	4	active	0.949983166	True
Canis_lupus_familiaris	tRNA-Thr-AGT-2-1	chr1	118960705	118960779	-	8	-27.3	82.6	1.638148649	21	0.131782946	1.004734085	-1.4364	0	43	active	0.938743043	True
Canis_lupus_familiaris	tRNA-Thr-AGT-2-2	chr5	33001316	33001390	+	8	-27.3	82.6	0.720864865	14	0.073643411	0.927397986	-4.0452	3	125	active	0.987276857	True
Canis_lupus_familiaris	tRNA-Thr-AGT-2-3	chr5	33031886	33031960	-	8	-27.3	82.6	1.368635135	30	0.064599483	0.991586538	-3.24625	6	133	active	0.98456647	True
Canis_lupus_familiaris	tRNA-Thr-AGT-3-1	chr35	24297887	24297961	-	8	-27	81.4	1.612986486	7	0.032299742	0.682471264	-3.51025	3	31	active	0.988413044	True
Canis_lupus_familiaris	tRNA-Thr-AGT-4-1	chr5	32956879	32956953	-	8	-27.3	80.1	1.336635135	140	0.100775194	0.759368836	-3.98145	2	99	active	0.931277207	True
Canis_lupus_familiaris	tRNA-Thr-AGT-5-1	chr35	24941455	24941529	-	8	-25.3	78.6	0.573445946	19	0.005167959	0.086805556	-2.80675	4	28	inactive	-0.623657977	True
Canis_lupus_familiaris	tRNA-Thr-AGT-6-1	chr35	24574804	24574878	+	8	-24.8	79.1	1.461918919	11	0.009043928	0.616921269	-2.3965	3	26	active	0.707219087	True
Canis_lupus_familiaris	tRNA-Thr-CGT-1-1	chr35	25601671	25601745	-	4	-24	82.8	0.903310811	4	0.032299742	0.745614035	-1.8989	0	24	active	0.983662616	True
Canis_lupus_familiaris	tRNA-Thr-CGT-2-1	chr6	28896498	28896570	-	4	-27	79.6	0	30	0.134715026	1.108724832	0	0	21	active	0.737243243	True
Canis_lupus_familiaris	tRNA-Thr-CGT-3-1	chr35	24897948	24898021	+	4	-27.5	76.8	0.713589041	13	0.031047865	0.680272109	-0.6707	1	11	active	0.945929055	True
Canis_lupus_familiaris	tRNA-Thr-CGT-4-1	chrX	114614115	114614188	+	4	-19.5	53.4	-0.091178082	14	0.007761966	0.133282559	-0.0501	0	32	inactive	-0.923015225	True
Canis_lupus_familiaris	tRNA-Thr-TGT-1-1	chr35	25582517	25582591	-	4	-26	78.3	0.851918919	4	0.012919897	0.29211295	-2.11845	0	19	inactive	-0.515975949	True
Canis_lupus_familiaris	tRNA-Thr-TGT-2-1	chr38	16787090	16787163	+	4	-29.1	84.1	0.493547945	15	0.045278137	0.430731364	-3.04395	0	32	active	0.946371624	True
Canis_lupus_familiaris	tRNA-Thr-TGT-3-1	chr11	391217	391290	-	4	-29.7	78.8	1.528561644	7	0.091849935	0.86450247	-3.674	2	33	active	0.986303038	True
Canis_lupus_familiaris	tRNA-Thr-TGT-3-2	chr15	17919481	17919554	-	4	-29.7	78.8	1.35969863	7	0.099611902	0.772413793	-1.7284	5	28	active	0.97733195	True
Canis_lupus_familiaris	tRNA-Trp-CCA-1-1	chr35	24224831	24224903	-	6	-25.1	75.7	1.298222222	4	0.019430052	0.33993784	-2.7995	1	35	active	0.879540998	True
Canis_lupus_familiaris	tRNA-Trp-CCA-2-1	chr5	33000497	33000569	+	6	-25.1	73.3	1.595208333	4	0.14119171	0.802025047	-1.7731	3	124	active	0.935990013	True
Canis_lupus_familiaris	tRNA-Trp-CCA-3-1	chr6	10109497	10109569	-	6	-25.1	74.3	0.502911765	10	0.055699482	0.507099391	-1.5299	0	74	active	0.983411968	True
Canis_lupus_familiaris	tRNA-Trp-CCA-4-1	chr5	33027577	33027649	-	6	-24.5	73.4	1.141222222	13	0.063471503	0.810185185	-3.66255	6	123	active	0.988147176	True
Canis_lupus_familiaris	tRNA-Trp-CCA-5-1	chr15	37923588	37923660	+	6	-25.1	74.3	1.702111111	5	0.080310881	0.982504243	0.596	1	30	active	0.964940339	True
Canis_lupus_familiaris	tRNA-Trp-CCA-6-1	chr5	40705325	40705399	-	6	-16.1	57.6	1.147445946	6	0.131782946	0.999802994	-2.16755	0	21	active	0.725312026	True
Canis_lupus_familiaris	tRNA-Tyr-GTA-1-1	chr35	24339256	24339346	+	9	-32	77.9	1.613671233	7	0.064556962	0.791855204	-3.54265	2	33	active	0.988180772	True
Canis_lupus_familiaris	tRNA-Tyr-GTA-1-2	chr35	24344524	24344612	+	9	-27.7	78	0.667027397	6	0.058375635	0.486111111	-2.3988	2	32	active	0.986603643	True
Canis_lupus_familiaris	tRNA-Tyr-GTA-2-1	chr17	21046271	21046361	+	9	-30.3	77.9	1.684082192	12	0.058227848	0.776053215	-3.65215	1	98	active	0.98850311	True
Canis_lupus_familiaris	tRNA-Tyr-GTA-3-1	chr35	24354979	24355070	+	9	-29.7	77.5	0.685561644	7	0.02022756	0.323076923	-2.066105263	1	32	active	0.905199861	True
Canis_lupus_familiaris	tRNA-Tyr-GTA-4-1	chr15	17926181	17926272	-	9	-34.8	75.4	-0.110780822	11	0.064475348	0.781763237	-4.3482	5	27	active	0.95252604	True
Canis_lupus_familiaris	tRNA-Tyr-GTA-4-2	chr29	15776331	15776424	+	9	-31	75.3	0.866506849	8	0.090794451	0.866682642	-2.8873	3	22	active	0.985271299	True
Canis_lupus_familiaris	tRNA-Tyr-GTA-4-3	chr29	15776937	15777027	+	9	-30.6	75.4	1.257013699	13	0.087341772	1.131221719	-3.3045	3	22	active	0.986494991	True
Canis_lupus_familiaris	tRNA-Tyr-GTA-5-1	chr8	13428589	13428679	-	9	-30.7	69.3	0.091410959	12	0.124050633	0.923530629	-0.22285	0	24	active	0.859198475	True
Canis_lupus_familiaris	tRNA-Tyr-GTA-6-1	chr16	14338938	14339010	-	9	-28	66.3	0.166972222	13	0.012953368	0.252525253	-2.30625	2	36	inactive	-0.511038852	True
Canis_lupus_familiaris	tRNA-Und-NNN-1-1	chr5	77225906	77225981	+	2	-26.8	65	0.644866667	5	0.130322581	0.815280689	-1.16835	0	49	active	0.886377578	True
Canis_lupus_familiaris	tRNA-Und-NNN-2-1	chr15	17926713	17926785	-	2	-28.9	63.3	0.300277778	15	0.041450777	0.845410628	-3.71355	4	28	active	0.943676394	True
Canis_lupus_familiaris	tRNA-Val-AAC-1-1	chr11	388487	388560	-	6	-24.7	79.4	0.193835616	17	0.062095731	0.919976636	-4.30865	2	33	active	0.985232027	True
Canis_lupus_familiaris	tRNA-Val-AAC-1-2	chr11	411121	411194	-	6	-24.7	79.4	0.677493151	17	0.041397154	0.657894737	-3.675	4	33	active	0.988009344	True
Canis_lupus_familiaris	tRNA-Val-AAC-1-3	chr34	34376537	34376610	+	6	-24.7	79.4	1.615041096	4	0.03622251	0.529719318	-6.00265	0	45	active	0.988832921	True
Canis_lupus_familiaris	tRNA-Val-AAC-2-1	chr35	24609562	24609635	+	6	-23.7	79	-0.027657534	11	0.02457956	0.166165533	-1.756	0	34	active	0.603915772	True
Canis_lupus_familiaris	tRNA-Val-AAC-3-1	chr35	24437202	24437275	-	6	-26.9	76.7	-0.358835616	8	0.046571798	0.513196481	-1.948111111	3	25	active	0.956461441	True
Canis_lupus_familiaris	tRNA-Val-AAC-4-1	chr35	24938068	24938141	-	6	-20.8	65.1	0.374493151	54	0.006468305	0.147960262	-0.84675	4	27	inactive	-0.812420711	True
Canis_lupus_familiaris	tRNA-Val-CAC-1-1	chr11	414794	414867	-	8	-24.7	79.4	1.382986301	2	0.086675291	0.851640712	-2.6176	3	33	active	0.987083376	True
Canis_lupus_familiaris	tRNA-Val-CAC-1-2	chr17	58894088	58894161	+	8	-24.7	79.4	0.199383562	279	0.06080207	0.675381264	-3.12325	3	12	active	0.882175071	False
Canis_lupus_familiaris	tRNA-Val-CAC-1-3	chr17	58923494	58923567	-	8	-24.7	79.4	0.267205479	279	0.06080207	0.675381264	-3.3185	3	10	active	0.883748163	False
Canis_lupus_familiaris	tRNA-Val-CAC-1-4	chr17	58974883	58974956	+	8	-24.7	79.4	0.199383562	279	0.06080207	0.658472344	-3.12325	1	18	active	0.842035468	False
Canis_lupus_familiaris	tRNA-Val-CAC-1-5	chr17	58999267	58999340	-	8	-24.7	79.4	0.267205479	279	0.062095731	0.670415225	-3.3185	2	23	active	0.868746442	True
Canis_lupus_familiaris	tRNA-Val-CAC-1-6	chr35	24302408	24302481	+	8	-24.7	79.4	1.302273973	11	0.120310479	1.180392157	-3.33295	3	32	active	0.933493089	True
Canis_lupus_familiaris	tRNA-Val-CAC-2-1	chr20	55036663	55036736	+	8	-22.5	80.4	0.210027397	8	0.077619664	0.702341137	-2.70855	1	46	active	0.983595054	True
Canis_lupus_familiaris	tRNA-Val-CAC-3-1	chr35	24589380	24589453	-	8	-24.2	71.6	0.555479452	10	0.03622251	0.231073944	-1.53935	2	24	active	0.829773615	True
Canis_lupus_familiaris	tRNA-Val-TAC-1-1	chr35	24571138	24571211	-	5	-23.6	83.5	0.514424658	16	0.056921087	1.176948052	-1.4795	2	26	active	0.982574571	True
Canis_lupus_familiaris	tRNA-Val-TAC-2-1	chrX	14751817	14751890	-	5	-23.6	82.9	1.302657534	12	0.065976714	1.026995305	-4.68975	0	27	active	0.987453485	True
Canis_lupus_familiaris	tRNA-Val-TAC-3-1	chr18	37205942	37206015	+	5	-26	79.2	1.157835616	18	0.129366106	0.901674538	-2.88135	5	27	active	0.933923135	True
Canis_lupus_familiaris	tRNA-Val-TAC-4-1	chr35	24639079	24639152	-	5	-26.3	76	0.258876712	47	0.009055627	0.078125	-0.9557	0	28	inactive	-0.811494635	True
Canis_lupus_familiaris	tRNA-Val-TAC-5-1	chr19	7880715	7880789	-	5	-19.3	56	?	199	0.019379845	0.331021438	-2.751	0	2	active	0.53540598	True
Capra_hircus	NC_030808.1.tRNA10116-ValAAC	NC_030808.1	97128890	97128963	-	11	-24.7	79.4	1.458945205	1	0.028460543	0.518092105	-6.2462	0	35	active	0.987132938	True
Capra_hircus	NC_030808.1.tRNA10120-TyrGTA	NC_030808.1	97084200	97084290	-	16	-28.1	77.7	0.077767123	7	0.015189873	0.398957824	-0.04025	0	41	inactive	-0.585237944	True
Capra_hircus	NC_030808.1.tRNA10624-SerGCT	NC_030808.1	85190807	85190878	-	9	-16.9	56.3	-0.04871831	315	0.006485084	0	0.02815	0	0	inactive	-0.95260358	True
Capra_hircus	NC_030808.1.tRNA11284-GlnCTG	NC_030808.1	70977546	70977618	-	14	-13	56	0.074555556	86	0.00388601	0.11820331	0.02545	0	19	inactive	-0.945395572	True
Capra_hircus	NC_030808.1.tRNA11733-LysTTT	NC_030808.1	60688030	60688103	-	21	-23.8	62.2	0.099506849	11	0.006468305	0.147306397	-0.2593	0	0	inactive	-0.897304082	True
Capra_hircus	NC_030808.1.tRNA12526-GluTTC	NC_030808.1	42960854	42960927	-	38	-24.2	67.2	0.023493151	351	0.010349288	0.295508274	-0.46755	0	17	inactive	-0.95003889	True
Capra_hircus	NC_030808.1.tRNA1463-SerGGA	NC_030808.1	30237431	30237503	+	27	-18	61.8	0	137	0.007772021	0.75	0	0	0	inactive	-0.636741402	True
Capra_hircus	NC_030808.1.tRNA1511-SerGGA	NC_030808.1	32091688	32091761	+	27	-14.2	63.3	-0.090986301	265	0.010349288	0.051072523	-0.3565	0	0	inactive	-0.951040318	True
Capra_hircus	NC_030808.1.tRNA3514-LysTTT	NC_030808.1	80071035	80071110	+	21	-19	59.6	?	27	0.002580645	0	0.330875	0	26	inactive	-0.913493777	True
Capra_hircus	NC_030808.1.tRNA3703-SerGGA	NC_030808.1	83998315	83998387	+	27	-19.5	64.6	0.054819444	351	0.007772021	0.176544767	-0.22275	0	0	inactive	-0.969708272	True
Capra_hircus	NC_030808.1.tRNA3724-ArgCCT	NC_030808.1	84820101	84820174	+	19	-21.3	72	-0.001931507	96	0.003880983	0.199771689	-0.31495	0	0	inactive	-0.920753346	True
Capra_hircus	NC_030808.1.tRNA4100-CysGCA	NC_030808.1	93642757	93642829	+	38	-23.6	59.8	-0.590736111	338	0.006476684	0.106286061	-0.06235	0	2	inactive	-0.928440387	True
Capra_hircus	NC_030808.1.tRNA4637-CysGCA	NC_030808.1	106102780	106102853	+	38	-14.1	65.9	?	351	0.01164295	0.158061117	?	0	2	inactive	-0.963179072	True
Capra_hircus	NC_030808.1.tRNA4994-ArgTCT	NC_030808.1	112463773	112463846	+	12	-21.6	61.8	-0.050986301	277	0	0	-0.10055	0	0	inactive	-0.956660412	True
Capra_hircus	NC_030808.1.tRNA563-ArgCCT	NC_030808.1	8738739	8738812	+	19	-20.6	75	0.033356164	132	0.021992238	0.45751634	0.12085	0	4	inactive	-0.538909514	True
Capra_hircus	NC_030808.1.tRNA5684-GlyTCC	NC_030808.1	125936242	125936315	+	20	-17.1	64.8	-0.42418	38	0.005174644	0.259259259	-0.505571429	0	17	inactive	-0.870092914	True
Capra_hircus	NC_030808.1.tRNA6051-TrpCCA	NC_030808.1	132535439	132535512	+	40	-12.2	54.9	0	195	0.010349288	0.259547646	-0.01315	0	27	inactive	-0.954144753	True
Capra_hircus	NC_030808.1.tRNA6233-CysACA	NC_030808.1	137019439	137019511	+	2	-12.3	50.6	1.179944444	34	0.002590674	0	0.21195	1	0	inactive	-0.805477302	True
Capra_hircus	NC_030808.1.tRNA6234-CysGCA	NC_030808.1	137022068	137022140	+	38	-24.6	78	1.056294118	9	0.006476684	0.154049296	-1.410411765	1	0	inactive	-0.901263711	True
Capra_hircus	NC_030808.1.tRNA6805-SerGGA	NC_030808.1	148725113	148725186	+	27	-13.2	60.1	0.07827027	351	0.015523933	0	0.121933333	0	0	inactive	-0.960550328	True
Capra_hircus	NC_030808.1.tRNA923-LysTTT	NC_030808.1	18036603	18036676	+	21	-21.3	61.7	0.047506849	48	0.003880983	0.078125	-0.2392	0	13	inactive	-0.933099856	True
Capra_hircus	NC_030809.1.tRNA1116-GlyCCC	NC_030809.1	16104404	16104476	+	37	-19.8	64.7	0.026777778	89	0.005181347	0.171232877	-0.353	0	11	inactive	-0.962289563	True
Capra_hircus	NC_030809.1.tRNA11779-UndetNNN	NC_030809.1	16462236	16462308	-	4	-21.4	52.5	0.004069444	240	0.012953368	0.072629176	-0.0613	0	27	inactive	-0.936699959	True
Capra_hircus	NC_030809.1.tRNA11874-GlyCCC	NC_030809.1	15045885	15045958	-	37	-25.6	59	0.022575342	125	0.009055627	0.118083671	-0.0798	0	20	inactive	-0.961783575	True
Capra_hircus	NC_030809.1.tRNA2594-SerGGA	NC_030809.1	43126835	43126908	+	27	-17.7	63	0.050643836	351	0.010349288	0.226098191	-0.32515	0	1	inactive	-0.967041605	True
Capra_hircus	NC_030809.1.tRNA2963-CysGCA	NC_030809.1	50468136	50468208	+	38	-19.5	69.9	-0.055791667	264	0.007772021	0.179441169	-0.43075	0	28	inactive	-0.970500247	True
Capra_hircus	NC_030809.1.tRNA4035-ArgCCT	NC_030809.1	76268277	76268350	+	19	-18.2	68.7	0.05560274	281	0.001293661	0.112504018	-0.20025	0	5	inactive	-0.940129596	True
Capra_hircus	NC_030809.1.tRNA432-ValCAC	NC_030809.1	6339343	6339416	+	15	-24.1	56.3	0.072369863	134	0.009055627	0.133307941	-0.0396	0	7	inactive	-0.937246352	True
Capra_hircus	NC_030809.1.tRNA4381-SerGGA	NC_030809.1	86241720	86241793	+	27	-15.4	59.2	0	132	0.007761966	0	-0.2132	0	2	inactive	-0.947313005	True
Capra_hircus	NC_030809.1.tRNA4774-AlaCGC	NC_030809.1	96314967	96315039	+	3	-27.6	74.4	1.588166667	14	0.056994819	0.792947203	-2.62555	1	13	active	0.941443838	True
Capra_hircus	NC_030809.1.tRNA5455-GlyCCC	NC_030809.1	111980992	111981064	+	37	-21.1	60.1	0.071222222	351	0.009067358	0.436590437	-0.755	0	1	inactive	-0.719293607	True
Capra_hircus	NC_030809.1.tRNA550-GluTTC	NC_030809.1	7639586	7639658	+	38	-26.7	71.2	0.099833333	9	0.03238342	0.419720187	0.04215	0	24	active	0.704425023	True
Capra_hircus	NC_030809.1.tRNA6388-GluTTC	NC_030809.1	135236113	135236185	+	38	-24.8	70.4	0.709541667	11	0.062176166	1.091988728	-2.7675	0	50	active	0.924366418	True
Capra_hircus	NC_030809.1.tRNA6449-GluCTC	NC_030809.1	135659539	135659612	-	11	-23.3	64.9	0.111054795	351	0.003880983	0.078090138	0.0755	0	45	inactive	-0.911967958	True
Capra_hircus	NC_030809.1.tRNA6532-SerGGA	NC_030809.1	132949552	132949624	-	27	-18.3	64.5	?	351	0.00388601	0	0.122	0	0	inactive	-0.924591032	True
Capra_hircus	NC_030809.1.tRNA6606-SerGGA	NC_030809.1	131307076	131307148	-	27	-20	65.8	?	351	0.011658031	0.28340081	-0.198111111	0	35	inactive	-0.911773916	True
Capra_hircus	NC_030809.1.tRNA8109-GlyGCC	NC_030809.1	96315326	96315397	-	11	-26.4	81	0.975676056	8	0.028534371	0.124777184	-4.2033	1	13	active	0.884161235	True
Capra_hircus	NC_030809.1.tRNA8271-CysGCA	NC_030809.1	92240967	92241039	-	38	-13.8	62.1	?	137	0.012953368	0.339213026	-0.9255	0	4	inactive	-0.889973673	True
Capra_hircus	NC_030809.1.tRNA8895-CysGCA	NC_030809.1	75496687	75496759	-	38	-19.5	64.6	-0.016361111	185	0.005181347	0.06884343	-0.3163	0	0	inactive	-0.961801961	True
Capra_hircus	NC_030810.1.tRNA10109-TrpCCA	NC_030810.1	21822566	21822640	-	40	-26.6	52	0.122405405	231	0.007751938	0.180041152	-0.137	0	35	inactive	-0.941209049	True
Capra_hircus	NC_030810.1.tRNA1423-ProAGG	NC_030810.1	29105626	29105698	+	6	-23.8	57.2	-0.039986111	351	0.012953368	0.087719298	0.0824	0	34	inactive	-0.944733105	True
Capra_hircus	NC_030810.1.tRNA1706-AlaAGC	NC_030810.1	34886133	34886204	+	12	-21.8	62.5	-0.067941176	273	0	0	-0.631230769	0	13	inactive	-0.958320766	True
Capra_hircus	NC_030810.1.tRNA3154-GluTTC	NC_030810.1	69359466	69359538	+	38	-20.3	60.1	0.098	58	0.006476684	0	-0.0005	0	33	inactive	-0.929435811	True
Capra_hircus	NC_030810.1.tRNA3240-ArgTCT	NC_030810.1	70909496	70909581	+	12	-30.7	71.1	1.583356164	4	0.085350318	0.915525465	0.67875	0	19	active	0.952528023	True
Capra_hircus	NC_030810.1.tRNA3862-SupTCA	NC_030810.1	85701177	85701250	+	5	-20.9	66.6	0.072219178	243	0.002587322	0	-0.19765	0	12	inactive	-0.931307106	True
Capra_hircus	NC_030810.1.tRNA4548-GlnTTG	NC_030810.1	97950380	97950452	+	5	-19.7	61.7	-0.637388889	18	0.034974093	0.870827286	-1.122333333	0	12	active	0.723719272	True
Capra_hircus	NC_030810.1.tRNA4607-GluCTC	NC_030810.1	99179273	99179345	+	11	-26.4	73.2	1.269125	7	0.028497409	0.762527233	-3.99235	3	33	active	0.987808082	True
Capra_hircus	NC_030810.1.tRNA4608-GlyTCC	NC_030810.1	99181685	99181757	+	20	-25.1	73.8	1.263013889	10	0.023316062	0.46113307	-3.0822	4	32	active	0.985179672	True
Capra_hircus	NC_030810.1.tRNA4609-HisGTG	NC_030810.1	99182771	99182843	+	13	-25.5	60.1	1.245069444	30	0.06865285	0.898036591	-1.25855	4	32	active	0.974188698	True
Capra_hircus	NC_030810.1.tRNA4610-LysCTT	NC_030810.1	99183864	99183937	+	14	-28	87.8	1.093821918	8	0.050452781	0.868599791	-3.90495	4	32	active	0.988681048	True
Capra_hircus	NC_030810.1.tRNA4611-GlnCTG	NC_030810.1	99214678	99214750	+	14	-24.2	71.1	-0.420444444	25	0.03626943	0.266565118	-1.02635	1	18	active	0.629848502	True
Capra_hircus	NC_030810.1.tRNA4617-AsnGTT	NC_030810.1	99274117	99274191	+	22	-26.4	80.9	0.436986486	12	0.051679587	0.72878709	-1.68965	4	13	active	0.982260658	True
Capra_hircus	NC_030810.1.tRNA4618-GluTTC	NC_030810.1	99274531	99274603	+	38	-26.4	73.2	-0.237416667	7	0.037564767	0.623022152	-0.48285	3	13	active	0.750842621	True
Capra_hircus	NC_030810.1.tRNA4620-AsnGTT	NC_030810.1	99298082	99298156	+	22	-26.4	79.9	0.448054054	8	0.050387597	0.786516854	-1.5079	2	20	active	0.981873145	True
Capra_hircus	NC_030810.1.tRNA4751-AsnGTT	NC_030810.1	101396464	101396538	+	22	-26.4	80.9	0.013148649	12	0.080103359	0.61256448	-0.309388889	5	8	active	0.818857138	True
Capra_hircus	NC_030810.1.tRNA4752-ValCAC	NC_030810.1	101397142	101397215	+	15	-24.7	79.4	0.109068493	13	0.071151358	0.613006397	-3.31635	5	8	active	0.982496838	True
Capra_hircus	NC_030810.1.tRNA4753-GluTTC	NC_030810.1	101397712	101397784	+	38	-26.4	68.7	-0.081944444	66	0.049222798	0.68627451	-0.846166667	5	8	active	0.821083294	True
Capra_hircus	NC_030810.1.tRNA4754-HisGTG	NC_030810.1	101405872	101405944	+	13	-25.5	60.1	0.122111111	32	0.055699482	1.118925831	-0.5103	5	7	active	0.873735703	True
Capra_hircus	NC_030810.1.tRNA4755-GlyCCC	NC_030810.1	101431361	101431432	+	37	-26.4	79.3	-0.025239437	15	0.042801556	0.500581032	-0.3308	6	1	active	0.730883169	True
Capra_hircus	NC_030810.1.tRNA4756-GlnCTG	NC_030810.1	101435878	101435950	+	14	-24.2	71.1	-0.420444444	25	0.042746114	0.341653884	-1.08315	6	1	active	0.737102931	True
Capra_hircus	NC_030810.1.tRNA4759-GlnCTG	NC_030810.1	101445901	101445973	+	14	-24.2	71.1	-0.396625	26	0.066062176	0.436893204	-1.0958	2	1	active	0.871520516	False
Capra_hircus	NC_030810.1.tRNA4761-AsnGTT	NC_030810.1	101468001	101468075	+	22	-26.4	80.9	0.013148649	11	0.07751938	0.628205128	-0.26595	4	0	active	0.818591662	True
Capra_hircus	NC_030810.1.tRNA4762-ValCAC	NC_030810.1	101468672	101468745	+	15	-24.7	79.4	0.109068493	9	0.056921087	0.621141975	-3.31635	4	0	active	0.968624766	True
Capra_hircus	NC_030810.1.tRNA4763-GluTTC	NC_030810.1	101469690	101469762	+	38	-26.4	68.7	-0.081944444	5	0.042746114	0.659199048	-0.74955	4	0	active	0.80832873	True
Capra_hircus	NC_030810.1.tRNA4764-AsnGTT	NC_030810.1	101470763	101470837	+	22	-26.4	80.9	-1.091972973	11	0.042635659	0.512016719	-1.24	4	0	active	0.946253783	True
Capra_hircus	NC_030810.1.tRNA4765-HisGTG	NC_030810.1	101499572	101499644	+	13	-25.5	60.1	0.122111111	28	0.033678756	0.837053571	-0.34905	1	0	active	0.866757141	True
Capra_hircus	NC_030810.1.tRNA4766-AsnGTT	NC_030810.1	101504003	101504077	+	22	-26.4	80.9	0.022054054	10	0.049095607	0.768256648	-0.70865	2	0	active	0.847382648	True
Capra_hircus	NC_030810.1.tRNA4768-HisGTG	NC_030810.1	101560103	101560175	+	13	-25.5	60.1	0.122111111	30	0.056994819	0.903128696	-0.0382	1	1	active	0.883971109	True
Capra_hircus	NC_030810.1.tRNA4770-GluTTC	NC_030810.1	101584043	101584115	+	38	-26.4	68.7	0.141013889	3	0.069948187	0.561662521	-0.8501	5	1	active	0.866728799	False
Capra_hircus	NC_030810.1.tRNA4771-GlyCCC	NC_030810.1	101588132	101588203	+	37	-26.3	71.1	0.023661972	5	0.028534371	0.326188257	-0.60935	5	1	inactive	-0.522747842	True
Capra_hircus	NC_030810.1.tRNA4772-GlyCCC	NC_030810.1	101590456	101590527	+	37	-26.4	79.3	0.019225352	16	0.042801556	0.621075621	-0.70485	7	1	active	0.792534809	False
Capra_hircus	NC_030810.1.tRNA4773-AsnGTT	NC_030810.1	101600004	101600078	+	22	-26.4	80.9	0.078513514	33	0.074935401	0.991159	-0.1761	3	1	active	0.81822958	True
Capra_hircus	NC_030810.1.tRNA4776-ValAAC	NC_030810.1	101626004	101626077	+	11	-19.9	79	-0.019287671	19	0.02457956	0.357142857	-0.02075	0	8	inactive	-0.647029358	True
Capra_hircus	NC_030810.1.tRNA4778-ValAAC	NC_030810.1	101660999	101661072	+	11	-20.2	67.3	0	17	0.033635188	0.546875	0	1	11	active	0.635121047	True
Capra_hircus	NC_030810.1.tRNA4781-AsnGTT	NC_030810.1	101681989	101682063	+	22	-22.3	71.1	0.122148649	12	0.064599483	0.449604743	-0.3293	3	11	active	0.876501401	True
Capra_hircus	NC_030810.1.tRNA4782-ValCAC	NC_030810.1	101682668	101682741	+	15	-24.7	79.4	0.122150685	13	0.065976714	0.555379245	-0.5261	3	11	active	0.901642841	True
Capra_hircus	NC_030810.1.tRNA4783-GluTTC	NC_030810.1	101683238	101683310	+	38	-22.9	63.4	-0.047263889	66	0.044041451	0.629609642	-0.45375	3	11	active	0.703314878	True
Capra_hircus	NC_030810.1.tRNA4785-GlyCCC	NC_030810.1	101720630	101720701	+	37	-26.4	79.3	-0.025239437	15	0.04150454	0.500581032	-0.3308	5	12	active	0.730079401	True
Capra_hircus	NC_030810.1.tRNA4786-GlnCTG	NC_030810.1	101725147	101725219	+	14	-24.2	71.1	-0.396625	25	0.037564767	0.290577003	-1.08315	4	13	active	0.665233302	True
Capra_hircus	NC_030810.1.tRNA4864-iMetCAT	NC_030810.1	103442931	103443003	+	11	-26.1	60.4	1.561222222	6	0.03238342	0.643678161	-4.4474	0	79	active	0.987572661	True
Capra_hircus	NC_030810.1.tRNA5241-LeuCAG	NC_030810.1	112021153	112021235	+	6	-32.4	61.5	?	8	0.12915601	0.999571612	?	7	18	active	0.903108561	True
Capra_hircus	NC_030810.1.tRNA5242-GlyTCC	NC_030810.1	112022539	112022611	+	20	-25.1	73.8	0	11	0.119170984	1.027173913	0	8	16	active	0.717641454	True
Capra_hircus	NC_030810.1.tRNA5243-GluCTC	NC_030810.1	112022886	112022958	+	11	-22.4	60.3	-0.0664	60	0.079015544	0.774393392	0.042	8	17	active	0.712558265	True
Capra_hircus	NC_030810.1.tRNA5244-AspGTC	NC_030810.1	112030185	112030257	+	13	-26.4	66.5	0	11	0.137305699	0.933333333	0	13	17	active	0.727639159	False
Capra_hircus	NC_030810.1.tRNA5245-GlyTCC	NC_030810.1	112031015	112031087	+	20	-25.1	73.8	0	11	0.120466321	0.99852071	0	12	17	active	0.731091333	False
Capra_hircus	NC_030810.1.tRNA5246-GluCTC	NC_030810.1	112031365	112031437	+	11	-26.4	73.2	-0.066383333	61	0.080310881	0.7852077	0.042	11	17	active	0.730609748	False
Capra_hircus	NC_030810.1.tRNA5247-AspGTC	NC_030810.1	112038689	112038761	+	13	-26.4	66.5	0	11	0.137305699	0.933333333	0	8	17	active	0.727639159	False
Capra_hircus	NC_030810.1.tRNA5248-GlyTCC	NC_030810.1	112039519	112039591	+	20	-25.1	73.8	0	11	0.120466321	0.99852071	0	8	17	active	0.731091333	False
Capra_hircus	NC_030810.1.tRNA5249-GluCTC	NC_030810.1	112039869	112039941	+	11	-26.4	73.2	-0.066383333	61	0.080310881	0.7852077	0.042	7	17	active	0.779121689	False
Capra_hircus	NC_030810.1.tRNA5253-GlyTCC	NC_030810.1	112111737	112111809	+	20	-25.1	73.8	0.901402778	10	0.046632124	0.73979308	-1.94245	3	15	active	0.984275215	True
Capra_hircus	NC_030810.1.tRNA5254-AspGTC	NC_030810.1	112112696	112112768	+	13	-26.4	66.5	0.602875	13	0.03238342	0.898752751	-3.80215	2	15	active	0.986673774	True
Capra_hircus	NC_030810.1.tRNA5255-AsnGTT	NC_030810.1	112125049	112125123	+	22	-26.4	80.9	1.169594595	11	0.042635659	0.651162791	-4.51905	0	13	active	0.987516545	True
Capra_hircus	NC_030810.1.tRNA5513-ProCGG	NC_030810.1	119081309	119081381	+	2	-29.5	70.2	1.141958333	4	0.082901554	0.818867925	-1.0661	1	10	active	0.913902313	True
Capra_hircus	NC_030810.1.tRNA5597-ProAGG	NC_030810.1	119082035	119082107	-	6	-29.5	70.2	1.416763889	2	0.044041451	0.482536765	-3.7663	1	10	active	0.987450628	True
Capra_hircus	NC_030810.1.tRNA5840-GlyGCC	NC_030810.1	113181172	113181243	-	11	-20.9	57.2	?	14	0.019455253	0.388026608	?	0	18	active	0.543509358	True
Capra_hircus	NC_030810.1.tRNA5895-LeuCAG	NC_030810.1	112110994	112111077	-	6	-32.8	77.3	0.971493976	11	0.037037037	0.799695354	-4.24	3	15	active	0.986634669	True
Capra_hircus	NC_030810.1.tRNA5896-GlyGCC	NC_030810.1	112102364	112102435	-	11	-26.4	81	1.090098592	6	0.028534371	0.782414307	-3.2438	2	18	active	0.987330571	True
Capra_hircus	NC_030810.1.tRNA5898-LeuCAG	NC_030810.1	112038049	112038132	-	6	-35.7	78.2	0.320542169	8	0.131545338	0.992250992	-0.1346	9	17	active	0.749379987	False
Capra_hircus	NC_030810.1.tRNA5899-GlyGCC	NC_030810.1	112036510	112036581	-	11	-28.8	80.9	0.297070423	14	0.116731518	1.047207447	-0.205315789	9	17	active	0.815628409	False
Capra_hircus	NC_030810.1.tRNA5900-LeuCAG	NC_030810.1	112029544	112029627	-	6	-35.7	78.2	0.320542169	8	0.131545338	0.992250992	-0.1346	12	17	active	0.749379987	False
Capra_hircus	NC_030810.1.tRNA5901-GlyGCC	NC_030810.1	112028005	112028076	-	11	-28.8	80.9	0.297070423	14	0.118028534	1.067428191	-0.205315789	10	17	active	0.794083577	False
Capra_hircus	NC_030810.1.tRNA5902-AspGTC	NC_030810.1	112020516	112020588	-	13	-26.4	66.5	?	11	0.133419689	0.933333333	?	6	17	active	0.913812573	False
Capra_hircus	NC_030810.1.tRNA5905-ValCAC	NC_030810.1	111982390	111982463	-	15	-24.7	79.4	1.070438356	10	0.058214748	0.605745933	-2.56195	0	24	active	0.988402468	True
Capra_hircus	NC_030810.1.tRNA6040-ArgTCT	NC_030810.1	109327976	109328050	-	12	-27.7	78.5	1.51627027	19	0.027131783	0.392464678	1.45095	0	12	active	0.820832177	True
Capra_hircus	NC_030810.1.tRNA6400-AsnGTT	NC_030810.1	101722710	101722784	-	22	-26.4	76.3	0.122459459	12	0.072351421	0.45751634	-0.32805	5	13	active	0.89059887	True
Capra_hircus	NC_030810.1.tRNA6401-ValCAC	NC_030810.1	101722033	101722106	-	15	-24.7	79.4	0.12209589	13	0.067270375	0.521376434	-0.52155	5	12	active	0.894402312	True
Capra_hircus	NC_030810.1.tRNA6402-GluTTC	NC_030810.1	101721464	101721536	-	38	-26.4	68.7	-0.045388889	66	0.051813472	0.6875	-0.3631	5	12	active	0.71659191	True
Capra_hircus	NC_030810.1.tRNA6403-ValAAC	NC_030810.1	101713496	101713569	-	11	-24.7	79.4	0	19	0.029754204	0.429623568	0	6	11	active	0.652609998	False
Capra_hircus	NC_030810.1.tRNA6405-AsnATT	NC_030810.1	101709767	101709841	-	2	-18.9	71.3	0.122459459	12	0.068475452	0.531430307	-0.32805	2	11	active	0.74487982	True
Capra_hircus	NC_030810.1.tRNA6406-ValCAC	NC_030810.1	101709090	101709163	-	15	-24.7	79.4	0.12209589	13	0.068564036	0.560640732	-0.52155	2	11	active	0.901642841	False
Capra_hircus	NC_030810.1.tRNA6409-GlnCTG	NC_030810.1	101679565	101679637	-	14	-24.2	67.5	-0.422430556	25	0.041450777	0.30478955	-1.153684211	3	11	active	0.707995429	True
Capra_hircus	NC_030810.1.tRNA6413-AsnGTT	NC_030810.1	101661724	101661798	-	22	-18.3	50.8	-0.329648649	0	0.032299742	0.602150538	-0.74705	1	11	active	0.547590826	True
Capra_hircus	NC_030810.1.tRNA6415-AsnGTT	NC_030810.1	101645985	101646059	-	22	-26.4	81.5	-0.051986486	11	0.050387597	0.352743561	-1.0309	2	8	active	0.726760022	True
Capra_hircus	NC_030810.1.tRNA6417-HisGTG	NC_030810.1	101641375	101641447	-	13	-25.5	60.1	0.122152778	25	0.044041451	0.983284169	0.04175	2	8	active	0.891883875	True
Capra_hircus	NC_030810.1.tRNA6418-AsnGTT	NC_030810.1	101637290	101637364	-	22	-25.7	74	0.1225	10	0.050387597	0.869565217	-0.209833333	2	8	active	0.897283732	True
Capra_hircus	NC_030810.1.tRNA6421-HisGTG	NC_030810.1	101599238	101599310	-	13	-25.5	60.1	0.122222222	30	0.063471503	0.949400104	-0.0377	3	1	active	0.887492476	True
Capra_hircus	NC_030810.1.tRNA6422-GluTTC	NC_030810.1	101592758	101592830	-	38	-26.4	68.7	0.167097222	3	0.071243523	0.561662521	-0.891	7	1	active	0.862728799	False
Capra_hircus	NC_030810.1.tRNA6423-GlyCCC	NC_030810.1	101588669	101588740	-	37	-26.4	79.3	0.002521127	6	0.02464332	0.326188257	-0.71945	5	1	inactive	-0.508454455	True
Capra_hircus	NC_030810.1.tRNA6424-GlyCCC	NC_030810.1	101586345	101586416	-	37	-26.4	79.3	0.015239437	16	0.042801556	0.627413127	-0.6243	5	1	active	0.751286558	False
Capra_hircus	NC_030810.1.tRNA6425-AsnGTT	NC_030810.1	101559287	101559354	-	22	-19.5	55.8	0.074164179	0	0.056062581	0.836320191	-0.585	1	0	active	0.630583673	True
Capra_hircus	NC_030810.1.tRNA6426-ValCAC	NC_030810.1	101515645	101515721	-	15	-16.6	63.6	0.050078947	5	0.032216495	0.439919558	-1.1942	1	0	active	0.672433762	True
Capra_hircus	NC_030810.1.tRNA6427-ValAAC	NC_030810.1	101513102	101513175	-	11	-24.7	79.4	0.027232877	7	0.040103493	0.415542364	-1.9927	2	0	active	0.935420727	True
Capra_hircus	NC_030810.1.tRNA6428-GlnCTG	NC_030810.1	101464528	101464600	-	14	-24.2	71.1	-0.422430556	26	0.066062176	0.436893204	-1.0623	4	1	active	0.87779436	False
Capra_hircus	NC_030810.1.tRNA6431-ValCAC	NC_030810.1	101439219	101439291	-	15	-21.3	59.2	0.204069444	44	0.067357513	0.701121795	-3.60665	6	1	active	0.936458223	True
Capra_hircus	NC_030810.1.tRNA6432-AsnGTT	NC_030810.1	101433443	101433517	-	22	-26.4	80.9	0.122459459	12	0.072351421	0.520214031	-0.32805	6	1	active	0.877940059	True
Capra_hircus	NC_030810.1.tRNA6433-ValCAC	NC_030810.1	101432764	101432837	-	15	-24.7	79.4	0.12209589	13	0.067270375	0.564733	-0.52155	6	1	active	0.882935717	False
Capra_hircus	NC_030810.1.tRNA6434-GluTTC	NC_030810.1	101432195	101432267	-	38	-26.4	68.7	-0.045388889	66	0.045336788	0.667211329	-0.3631	6	1	active	0.715975558	True
Capra_hircus	NC_030810.1.tRNA6435-ValAAC	NC_030810.1	101423396	101423469	-	11	-24.7	79.4	0	19	0.029754204	0.456643918	0	5	7	active	0.712552286	False
Capra_hircus	NC_030810.1.tRNA6436-ValAAC	NC_030810.1	101418764	101418837	-	11	-24.7	79.4	0	19	0.028460543	0.424757282	0	2	7	active	0.658193382	True
Capra_hircus	NC_030810.1.tRNA6437-ValAAC	NC_030810.1	101412446	101412519	-	11	-18.9	71.7	0.077684932	19	0.018111255	0.127442651	-0.4902	2	7	inactive	-0.686916802	True
Capra_hircus	NC_030810.1.tRNA6438-GlyCCC	NC_030810.1	101398547	101398618	-	37	-26.4	79.3	-0.022457143	15	0.042801556	0.518518519	0.04085	5	8	active	0.719671685	True
Capra_hircus	NC_030810.1.tRNA6440-GlnCTG	NC_030810.1	101388694	101388766	-	14	-24.2	71.1	-0.422430556	25	0.054404145	0.403329065	-1.05385	4	8	active	0.854933463	True
Capra_hircus	NC_030810.1.tRNA6603-HisGTG	NC_030810.1	99297343	99297415	-	13	-25.5	60.1	0.363277778	15	0.031088083	0.665905632	-0.3734	2	20	active	0.889149881	True
Capra_hircus	NC_030810.1.tRNA6604-GlyCCC	NC_030810.1	99293362	99293433	-	37	-26.4	79.3	0.099591549	14	0.023346304	0.249598859	-0.0602	2	20	inactive	-0.507422776	True
Capra_hircus	NC_030810.1.tRNA6605-GluTTC	NC_030810.1	99282820	99282892	-	38	-26.4	68.7	-0.043666667	9	0.054404145	0.806318907	-1.75735	3	20	active	0.877494358	True
Capra_hircus	NC_030810.1.tRNA6607-HisGTG	NC_030810.1	99273398	99273470	-	13	-25.5	60.1	0.363277778	7	0.049222798	0.98470948	-0.66105	4	13	active	0.950979064	True
Capra_hircus	NC_030810.1.tRNA6608-AsnGTT	NC_030810.1	99264132	99264206	-	22	-24.2	76.5	0.451108108	15	0.047803618	0.748455568	-1.96235	2	13	active	0.98054069	True
Capra_hircus	NC_030810.1.tRNA6610-ValCAC	NC_030810.1	99218006	99218079	-	15	-19.1	62.7	0.189520548	330	0.067270375	0.755214577	-3.30705	1	18	active	0.734546001	True
Capra_hircus	NC_030810.1.tRNA6611-AsnGTT	NC_030810.1	99191456	99191530	-	22	-26.4	80.9	-0.030608108	5	0.03875969	0.703942076	-1.91195	3	31	active	0.95631318	True
Capra_hircus	NC_030810.1.tRNA662-AlaTGC	NC_030810.1	13761381	13761453	+	13	-26.5	78.7	?	2	0.010362694	0.088205645	-0.4054	1	25	inactive	-0.806423262	False
Capra_hircus	NC_030810.1.tRNA663-AlaTGC	NC_030810.1	13764366	13764438	+	13	-26.5	78.7	?	2	0.010362694	0.071443152	-0.4054	1	25	inactive	-0.806423262	False
Capra_hircus	NC_030810.1.tRNA6925-GlyCCC	NC_030810.1	93341604	93341677	-	37	-23	70.1	-0.02309589	184	0.010349288	0.211250604	0.0054	0	22	inactive	-0.970549005	True
Capra_hircus	NC_030810.1.tRNA7210-LysTTT	NC_030810.1	87866606	87866679	-	21	-28	87.4	0.122068493	13	0.002587322	0	-0.41585	0	2	inactive	-0.691670005	True
Capra_hircus	NC_030810.1.tRNA9415-GlnCTG	NC_030810.1	36818729	36818801	-	14	-19.5	55.7	-0.038041667	351	0.015544041	0.14	0	0	10	inactive	-0.98070285	True
Capra_hircus	NC_030810.1.tRNA9556-GlyCCC	NC_030810.1	33614211	33614284	-	37	-16.1	66.4	0.122287671	82	0.012936611	0.244379277	0.052	0	0	inactive	-0.91908869	True
Capra_hircus	NC_030810.1.tRNA9963-SerGGA	NC_030810.1	24996784	24996857	-	27	-13.9	62.9	?	102	0.010349288	0.069128975	-0.14	0	8	inactive	-0.921170441	True
Capra_hircus	NC_030811.1.tRNA10041-ArgCCT	NC_030811.1	17537630	17537703	-	19	-27.2	65.6	1.558479452	6	0.054333765	1.27349909	-1.2545	0	32	active	0.968217178	True
Capra_hircus	NC_030811.1.tRNA10288-ArgTCT	NC_030811.1	13318111	13318184	-	12	-16.9	56.1	0.072219178	44	0.003880983	0.163170163	-0.00115	0	9	inactive	-0.945804364	True
Capra_hircus	NC_030811.1.tRNA10559-CysGCA	NC_030811.1	8302390	8302462	-	38	-23.9	81.1	0.417291667	2	0.012953368	0.268734644	-1.0207	0	23	inactive	-0.766737687	True
Capra_hircus	NC_030811.1.tRNA10561-CysGCA	NC_030811.1	8290786	8290858	-	38	-24.6	81.8	0.424361111	9	0.015544041	0.202546296	-1.58985	3	20	inactive	-0.729568042	True
Capra_hircus	NC_030811.1.tRNA10562-CysGCA	NC_030811.1	8289484	8289556	-	38	-24.6	77.2	0.250180556	12	0.007772021	0.136363636	-1.42915	3	20	inactive	-0.860870661	True
Capra_hircus	NC_030811.1.tRNA10575-CysGCA	NC_030811.1	8155716	8155788	-	38	-24.6	77.2	0.423333333	13	0.006476684	0.12943787	-1.53395	2	30	inactive	-0.894958765	True
Capra_hircus	NC_030811.1.tRNA10576-CysGCA	NC_030811.1	8153463	8153535	-	38	-26.1	77.3	0.080708333	12	0.018134715	0.327190171	0.04	2	30	inactive	-0.657936657	True
Capra_hircus	NC_030811.1.tRNA10577-CysGCA	NC_030811.1	8150881	8150953	-	38	-24.6	77.2	0.037375	11	0.005181347	0.047195254	-1.28135	3	30	inactive	-0.869404894	True
Capra_hircus	NC_030811.1.tRNA10579-CysGCA	NC_030811.1	8142229	8142301	-	38	-24.6	74	0.678625	13	0.002590674	0.090415913	-1.0479	3	29	inactive	-0.875231372	True
Capra_hircus	NC_030811.1.tRNA10580-CysGCA	NC_030811.1	8138095	8138167	-	38	-21.6	74.7	0.232013889	2	0.006476684	0.099206349	-1.69005	2	28	inactive	-0.794280174	True
Capra_hircus	NC_030811.1.tRNA10582-CysGCA	NC_030811.1	8115966	8116038	-	38	-24.6	77.2	0.443319444	12	0.006476684	0.150667241	-0.8245	2	46	inactive	-0.943135355	True
Capra_hircus	NC_030811.1.tRNA10596-CysGCA	NC_030811.1	7937945	7938017	-	38	-26.1	77.3	0.384541667	5	0.010362694	0.249465431	-1.7138	1	78	inactive	-0.816260774	True
Capra_hircus	NC_030811.1.tRNA2251-SerGGA	NC_030811.1	41604295	41604368	+	27	-13.9	62.9	-0.063164179	181	0.009055627	0.087851406	-0.26875	0	0	inactive	-0.965510039	True
Capra_hircus	NC_030811.1.tRNA2622-CysGCA	NC_030811.1	50092998	50093071	+	38	-13.4	60.9	-0.076671233	138	0.009055627	0.111607143	-0.0648	0	1	inactive	-0.950142024	True
Capra_hircus	NC_030811.1.tRNA389-CysGCA	NC_030811.1	7941416	7941488	+	38	-24.6	77.2	0.459236111	12	0.006476684	0.145631068	-0.8196	1	83	inactive	-0.940126637	True
Capra_hircus	NC_030811.1.tRNA399-CysGCA	NC_030811.1	8120403	8120475	+	38	-26.1	77.3	0.423972222	5	0.009067358	0.124069479	-1.8501	2	38	inactive	-0.856062476	True
Capra_hircus	NC_030811.1.tRNA400-CysGCA	NC_030811.1	8125311	8125383	+	38	-23.9	77.1	0.463055556	41	0.016839378	0.373134328	-1.54755	3	33	inactive	-0.644450396	True
Capra_hircus	NC_030811.1.tRNA402-CysGCA	NC_030811.1	8135161	8135232	+	38	-23.4	60.4	0.339507042	11	0.019455253	0.267814443	-0.867	3	27	inactive	-0.503987923	True
Capra_hircus	NC_030811.1.tRNA410-CysGCA	NC_030811.1	8256695	8256767	+	38	-22.8	68.1	0.310097222	12	0.018134715	0.39161835	-2.2023	1	19	active	0.575738426	True
Capra_hircus	NC_030811.1.tRNA412-CysGCA	NC_030811.1	8262711	8262783	+	38	-26.1	77.3	0.099958333	351	0.010362694	0.220588235	-0.20235	2	18	inactive	-0.946664077	True
Capra_hircus	NC_030811.1.tRNA414-CysGCA	NC_030811.1	8269015	8269087	+	38	-24.6	72.7	0.385958333	17	0.00388601	0	-2.2993	1	21	inactive	-0.867069777	True
Capra_hircus	NC_030811.1.tRNA415-CysGCA	NC_030811.1	8281633	8281705	+	38	-23.9	81.1	0.07375	12	0.007772021	0.132275132	-2.3851	3	22	inactive	-0.675546155	True
Capra_hircus	NC_030811.1.tRNA416-CysGCA	NC_030811.1	8284493	8284565	+	38	-19.5	58.9	0.634680556	4	0.014248705	0.178062678	-1.5232	3	20	inactive	-0.781374684	True
Capra_hircus	NC_030811.1.tRNA660-SerGGA	NC_030811.1	12288261	12288334	+	27	-18.4	57.4	?	170	0.016817594	0.141129032	?	0	0	inactive	-0.86898898	True
Capra_hircus	NC_030811.1.tRNA6870-SupTCA	NC_030811.1	88112836	88112909	-	5	-22.9	60	-0.058013699	57	0.012936611	0.236742424	0.0847	0	25	inactive	-0.897714608	True
Capra_hircus	NC_030811.1.tRNA709-ValAAC	NC_030811.1	13415312	13415385	+	11	-23.2	79.3	0.099849315	19	0.01164295	0	-0.1587	0	8	inactive	-0.858130085	True
Capra_hircus	NC_030811.1.tRNA7453-GlyTCC	NC_030811.1	73509084	73509157	-	20	-22.1	59.2	0.078383562	351	0.015523933	0.05787037	-0.0633	0	9	inactive	-0.944489379	True
Capra_hircus	NC_030811.1.tRNA7782-TrpCCA	NC_030811.1	64908452	64908524	-	40	-21.1	64.4	-0.064972222	138	0.012953368	0	-0.342625	0	7	inactive	-0.947710997	True
Capra_hircus	NC_030811.1.tRNA9469-ProAGG	NC_030811.1	27381469	27381541	-	6	-29.5	70.2	1.361958333	2	0.018134715	0.126502214	-1.52835	0	89	active	0.751893257	True
Capra_hircus	NC_030811.1.tRNA9538-TrpCCA	NC_030811.1	26293070	26293143	-	40	-18.3	50.2	?	54	0.005174644	0	-0.1394	0	21	inactive	-0.918688147	True
Capra_hircus	NC_030811.1.tRNA9865-GlnCTG	NC_030811.1	20560025	20560097	-	14	-19.7	61.3	0.099236111	6	0.012953368	0.343137255	-0.53715	0	1	inactive	-0.774359845	True
Capra_hircus	NC_030812.1.tRNA10438-LysTTT	NC_030812.1	45886927	45886999	-	21	-17.8	53.4	0.0995	199	0.006476684	0.12345679	-0.0453	0	17	inactive	-0.929764401	True
Capra_hircus	NC_030812.1.tRNA10763-GlnCTG	NC_030812.1	38902106	38902179	-	14	-18.3	51	0.052054795	173	0.010349288	0.40174472	-0.20505	0	0	inactive	-0.811730869	True
Capra_hircus	NC_030812.1.tRNA10922-SerGGA	NC_030812.1	34495170	34495242	-	27	-18.3	63.1	0	287	0.010362694	0.166165533	-0.1553	0	20	inactive	-0.970639907	True
Capra_hircus	NC_030812.1.tRNA11171-UndetNNN	NC_030812.1	29400726	29400799	-	4	-23	51.2	0.070369863	24	0.006468305	0.211778943	0.03	0	58	inactive	-0.895991681	True
Capra_hircus	NC_030812.1.tRNA11672-TrpCCA	NC_030812.1	20069663	20069736	-	40	-13.7	53.1	?	311	0.007761966	0	-0.303666667	0	0	inactive	-0.94823947	True
Capra_hircus	NC_030812.1.tRNA1205-GluTTC	NC_030812.1	27913404	27913477	+	38	-26.9	73.6	0.033575342	293	0.002587322	0.103427896	0.1026	0	6	inactive	-0.889173634	True
Capra_hircus	NC_030812.1.tRNA1228-ArgCCT	NC_030812.1	28240015	28240088	+	19	-24.3	63.8	0.050589041	70	0.012936611	0.242005186	0.12155	0	34	inactive	-0.893497381	True
Capra_hircus	NC_030812.1.tRNA2473-SupCTA	NC_030812.1	53716501	53716574	+	3	-18.5	55	-0.045369863	351	0.007761966	0.549278092	0.15005	0	0	inactive	-0.74711995	True
Capra_hircus	NC_030812.1.tRNA2743-AspGTC	NC_030812.1	59020828	59020900	+	13	-26.4	66.5	1.541722222	9	0.022020725	0.318761384	-3.00635	0	44	active	0.857624835	True
Capra_hircus	NC_030812.1.tRNA2860-AspGTC	NC_030812.1	61392699	61392771	+	13	-26.4	65.4	1.036833333	12	0.03238342	0.416666667	-4.3035	1	19	active	0.96286032	True
Capra_hircus	NC_030812.1.tRNA2861-TrpCCA	NC_030812.1	61393390	61393462	+	40	-25.1	74.3	1.576777778	5	0.044041451	0.772285966	0.47705	1	19	active	0.893369058	True
Capra_hircus	NC_030812.1.tRNA3219-ArgTCT	NC_030812.1	68033456	68033529	+	12	-19.9	53.7	0.03069863	75	0.010349288	0.227198961	-0.25005	0	0	inactive	-0.922345313	True
Capra_hircus	NC_030812.1.tRNA4549-ArgCCT	NC_030812.1	92002972	92003044	+	19	-22.6	63.7	0.054819444	51	0	0	0.04065	0	2	inactive	-0.914257095	True
Capra_hircus	NC_030812.1.tRNA5548-GlnCTG	NC_030812.1	105749379	105749452	+	14	-29	56.5	0.099849315	278	0.014230272	0.352964905	-0.05225	0	40	inactive	-0.753867893	True
Capra_hircus	NC_030812.1.tRNA6209-AspGTC	NC_030812.1	115425725	115425798	+	13	-19.7	56.4	-0.007328767	61	0.023285899	0.313620072	-0.04545	0	29	inactive	-0.810524097	True
Capra_hircus	NC_030812.1.tRNA6469-GlyCCC	NC_030812.1	114907099	114907172	-	37	-17.9	63	0.004315068	351	0.023285899	0.352427836	-0.3424	0	19	inactive	-0.793171016	True
Capra_hircus	NC_030812.1.tRNA6946-MetCAT	NC_030812.1	106677339	106677412	-	11	-21.3	56.6	0.039945205	229	0.016817594	0.258971513	-0.0584	0	41	inactive	-0.886852531	True
Capra_hircus	NC_030812.1.tRNA7029-GlyCCC	NC_030812.1	105682159	105682232	-	37	-19.5	63.1	0.045561644	126	0.007761966	0.17921147	-0.10295	0	14	inactive	-0.968242523	True
Capra_hircus	NC_030812.1.tRNA719-ArgTCT	NC_030812.1	17946881	17946954	+	12	-19.6	56.4	-0.008424658	198	0.007761966	0.382653061	-0.6988	0	0	inactive	-0.900606025	True
Capra_hircus	NC_030812.1.tRNA72-TrpCCA	NC_030812.1	1842274	1842347	+	40	-18.3	50.2	0	84	0.010349288	0.230414747	-0.1483	0	1	inactive	-0.924388951	True
Capra_hircus	NC_030812.1.tRNA759-LysTTT	NC_030812.1	18931312	18931385	+	21	-16.2	63.9	0.099630137	220	0.005174644	0.261437908	0.1206	0	3	inactive	-0.900771857	True
Capra_hircus	NC_030812.1.tRNA7608-SupTCA	NC_030812.1	97286894	97286967	-	5	-15.5	59	?	156	0.003880983	0.086848635	-0.5045	0	18	inactive	-0.904516425	True
Capra_hircus	NC_030812.1.tRNA8058-SerGGA	NC_030812.1	90997292	90997365	-	27	-13.9	62.2	?	190	0.001293661	0	-0.1945	0	0	inactive	-0.936306676	True
Capra_hircus	NC_030812.1.tRNA8374-LysTTT	NC_030812.1	85799763	85799836	-	21	-26.3	76.8	0.05409589	351	0.002587322	0	-0.3818	0	0	inactive	-0.927092898	True
Capra_hircus	NC_030812.1.tRNA88-IleGAT	NC_030812.1	2236250	2236324	+	1	-16.5	52.2	-0.022837838	80	0.00129199	0	-0.03995	0	3	inactive	-0.909291175	True
Capra_hircus	NC_030812.1.tRNA8921-TrpCCA	NC_030812.1	75126617	75126689	-	40	-19.5	63.5	?	165	0.002590674	0	-0.2966	0	3	inactive	-0.945189374	True
Capra_hircus	NC_030812.1.tRNA8982-GluTTC	NC_030812.1	73640899	73640971	-	38	-16.2	64	-0.054027778	292	0.012953368	0.192307692	-0.00855	0	31	inactive	-0.970055802	True
Capra_hircus	NC_030812.1.tRNA9066-ArgCCT	NC_030812.1	71961994	71962067	-	19	-21.1	55.7	0.011739726	34	0.016817594	0.197183099	-0.04115	0	0	inactive	-0.86058499	True
Capra_hircus	NC_030812.1.tRNA9353-AlaTGC	NC_030812.1	66583604	66583676	-	13	-25.5	74.8	0.250652778	52	0.002590674	0	-0.3499	0	22	inactive	-0.884035559	True
Capra_hircus	NC_030812.1.tRNA9862-SerCGA	NC_030812.1	56514834	56514916	-	2	-29.8	89.6	1.5265	5	0.04859335	0.609867938	-0.7818	0	168	active	0.932958896	True
Capra_hircus	NC_030813.1.tRNA1768-AlaTGC	NC_030813.1	45853758	45853833	+	13	-19.1	57.6	0.100733333	351	0.009032258	0.042735043	-0.3555	0	7	inactive	-0.925097387	True
Capra_hircus	NC_030813.1.tRNA222-GluTTC	NC_030813.1	6858722	6858795	+	38	-24.5	72.9	0.083410959	309	0.006468305	0.128960943	0.242684211	0	4	inactive	-0.9486466	True
Capra_hircus	NC_030813.1.tRNA2606-TrpCCA	NC_030813.1	65690780	65690852	+	40	-21.5	66.2	-0.016736111	138	0.009067358	0	-0.90285	0	1	inactive	-0.946250075	True
Capra_hircus	NC_030813.1.tRNA2649-AlaAGC	NC_030813.1	66489814	66489885	+	12	-17.1	60.3	0	2	0.011673152	0.213414634	?	0	1	inactive	-0.840433732	True
Capra_hircus	NC_030813.1.tRNA3535-CysGCA	NC_030813.1	86556675	86556748	+	38	-13.9	62.2	-0.022	351	0.01164295	0.081699346	-0.0475	0	27	inactive	-0.96849443	True
Capra_hircus	NC_030813.1.tRNA3915-AlaTGC	NC_030813.1	92205336	92205408	+	13	-24.8	74.4	0.054652778	2	0.010362694	0.158084914	-0.1935	0	5	inactive	-0.845476525	True
Capra_hircus	NC_030813.1.tRNA4931-TyrGTA	NC_030813.1	107556690	107556780	+	16	-20.9	51.1	-0.046013699	12	0.013924051	0.092592593	-0.52515	0	0	inactive	-0.916436345	True
Capra_hircus	NC_030813.1.tRNA6151-AlaTGC	NC_030813.1	106345337	106345409	-	13	-25	78.2	0.040513889	54	0.002590674	0	-0.500272727	0	0	inactive	-0.898902131	True
Capra_hircus	NC_030813.1.tRNA6321-ThrTGT	NC_030813.1	103640607	103640680	-	9	-22.5	52.3	0.044287671	56	0.007761966	0	-0.1911	0	2	inactive	-0.894750634	True
Capra_hircus	NC_030813.1.tRNA6817-TrpCCA	NC_030813.1	97078681	97078754	-	40	-19.9	58.4	-0.017643836	77	0.009055627	0.139553429	0.0512	0	2	inactive	-0.957599918	True
Capra_hircus	NC_030813.1.tRNA8681-GlyGCC	NC_030813.1	59860800	59860871	-	11	-17.1	62.7	0.06884507	10	0.010376135	0.386029412	0.1211	0	8	inactive	-0.788219391	True
Capra_hircus	NC_030813.1.tRNA8764-IleAAT	NC_030813.1	58471434	58471508	-	5	-14.4	69.3	0.001581081	276	0.014211886	0.222222222	-0.47105	0	8	inactive	-0.926882428	True
Capra_hircus	NC_030813.1.tRNA9636-AlaCGC	NC_030813.1	37650710	37650782	-	3	-26.5	79.7	0.094236111	69	0.015544041	0.221518987	-0.253	0	25	inactive	-0.764462725	True
Capra_hircus	NC_030814.1.tRNA10690-TrpCCA	NC_030814.1	2586767	2586840	-	40	-12.2	60.4	?	149	0.016817594	0.242130751	-0.3846	0	6	inactive	-0.868523301	True
Capra_hircus	NC_030814.1.tRNA1723-SerGGA	NC_030814.1	37412769	37412841	+	27	-20	65.8	0	267	0.010362694	0	0.05425	0	1	inactive	-0.960974048	True
Capra_hircus	NC_030814.1.tRNA2930-PheGAA	NC_030814.1	66676667	66676740	+	12	-21.9	88.9	0.449315068	4	0.075032342	1.078539823	-0.80555	1	76	active	0.964510899	True
Capra_hircus	NC_030814.1.tRNA3074-ValCAC	NC_030814.1	70228247	70228320	+	15	-24.7	79.4	1.339657534	8	0.047865459	0.678294574	-3.29175	2	34	active	0.989140436	True
Capra_hircus	NC_030814.1.tRNA3075-LysCTT	NC_030814.1	70228738	70228811	+	14	-28	87.8	0.180808219	8	0.03622251	0.429623568	-3.60305	2	34	active	0.950106066	True
Capra_hircus	NC_030814.1.tRNA3076-ValAAC	NC_030814.1	70234107	70234180	+	11	-24.7	79.4	0.614082192	16	0.032341527	0.464622328	-3.76095	4	34	active	0.987660138	True
Capra_hircus	NC_030814.1.tRNA3077-ThrTGT	NC_030814.1	70263374	70263447	+	9	-29.7	78.8	1.458013699	7	0.068564036	0.854961832	-3.9384	1	27	active	0.988269902	True
Capra_hircus	NC_030814.1.tRNA3109-LysCTT	NC_030814.1	70946339	70946412	+	14	-24.5	58.3	-0.043630137	114	0.006468305	0	0.1202	0	16	inactive	-0.941925587	True
Capra_hircus	NC_030814.1.tRNA3956-GlyCCC	NC_030814.1	89266961	89267033	+	37	-22.7	70.8	0.069902778	98	0.015544041	0.317124736	-0.2589	0	54	inactive	-0.905719166	True
Capra_hircus	NC_030814.1.tRNA4127-GlyTCC	NC_030814.1	91118754	91118826	+	20	-25.1	73.8	0.919652778	8	0.064766839	0.847578348	-4.30855	0	33	active	0.987590243	True
Capra_hircus	NC_030814.1.tRNA4546-GlyCCC	NC_030814.1	95452215	95452288	+	37	-17.8	63.4	0.086164384	351	0.010349288	0.057377049	-0.25195	0	93	inactive	-0.937304764	True
Capra_hircus	NC_030814.1.tRNA4997-iMetCAT	NC_030814.1	101205898	101205970	+	11	-26.1	60.4	?	4	0.011658031	0	-0.8455	0	58	inactive	-0.795999439	True
Capra_hircus	NC_030814.1.tRNA5114-LysCTT	NC_030814.1	102959068	102959141	+	14	-15.4	55	-0.154986301	197	0.012936611	0.296538368	-0.33585	0	123	inactive	-0.927996931	True
Capra_hircus	NC_030814.1.tRNA5648-GluTTC	NC_030814.1	103209699	103209771	-	38	-18.6	56	-0.153652778	163	0.009067358	0.113378685	-0.1357	0	72	inactive	-0.937639816	True
Capra_hircus	NC_030814.1.tRNA5989-ArgCCT	NC_030814.1	98007823	98007896	-	19	-23.3	62.6	0.07209589	351	0.009055627	0.161887142	-0.039	0	92	inactive	-0.949025569	True
Capra_hircus	NC_030814.1.tRNA6565-LysTTT	NC_030814.1	91847516	91847589	-	21	-16.7	67.4	0.033342466	351	0.010349288	0.441083806	0.12125	0	94	inactive	-0.768095678	True
Capra_hircus	NC_030814.1.tRNA6716-SupCTA	NC_030814.1	90272335	90272408	-	3	-21.2	60.5	-0.212041096	351	0.021992238	0.574494949	-0.27235	0	84	inactive	-0.595737531	True
Capra_hircus	NC_030814.1.tRNA6917-GlnTTG	NC_030814.1	86166733	86166805	-	5	-21.3	60.9	-0.091708333	132	0.007772021	0.182070401	-0.1223	0	14	inactive	-0.914520779	True
Capra_hircus	NC_030814.1.tRNA7160-ArgCCT	NC_030814.1	80087312	80087385	-	19	-18.6	61.4	0.071315068	94	0.007761966	0.15	0.01235	0	3	inactive	-0.908437752	True
Capra_hircus	NC_030814.1.tRNA7625-LeuAAG	NC_030814.1	70267891	70267973	-	4	-30.7	74.8	-0.188487805	13	0.039641944	0.747292969	-3.4868	1	28	active	0.932152495	True
Capra_hircus	NC_030814.1.tRNA7626-AlaTGC	NC_030814.1	70242256	70242328	-	13	-26.5	79.7	1.266472222	17	0.042746114	0.602755454	-4.08955	2	35	active	0.988841405	True
Capra_hircus	NC_030814.1.tRNA7627-LysCTT	NC_030814.1	70241719	70241792	-	14	-28	87.8	0.989219178	9	0.037516171	0.704334365	-2.7893	2	35	active	0.987650347	True
Capra_hircus	NC_030814.1.tRNA7730-LeuCAA	NC_030814.1	67819290	67819396	-	2	-37.5	75.6	0.8715	6	0.060794045	0.587686567	-2.02095	1	33	active	0.931158005	True
Capra_hircus	NC_030814.1.tRNA7731-GluCTC	NC_030814.1	67818936	67819008	-	11	-26.4	73.2	0.903777778	6	0.049222798	0.994318182	-2.51885	1	33	active	0.987466758	True
Capra_hircus	NC_030814.1.tRNA7779-AsnGTT	NC_030814.1	66676461	66676535	-	22	-26.4	80.9	0.886959459	11	0.095607235	0.940860215	-2.08565	1	76	active	0.983219976	True
Capra_hircus	NC_030814.1.tRNA8421-AlaAGC	NC_030814.1	51587760	51587832	-	12	-19	74.4	0.004152778	351	0.010362694	0.262762763	-0.0535	0	21	inactive	-0.931432978	True
Capra_hircus	NC_030814.1.tRNA8619-CysGCA	NC_030814.1	47763503	47763576	-	38	-13.9	62.2	0.004219178	351	0.015523933	0.24386845	-0.17835	0	30	inactive	-0.963854531	True
Capra_hircus	NC_030815.1.tRNA1352-HisGTG	NC_030815.1	29611296	29611368	+	13	-25.5	60.1	0.88975	14	0.023316062	0.290516705	-0.21185	0	2	active	0.602069283	True
Capra_hircus	NC_030815.1.tRNA1528-TrpCCA	NC_030815.1	35341444	35341517	+	40	-13.9	62.9	0	254	0.01164295	0.101744186	-1.0737	0	1	inactive	-0.964918144	True
Capra_hircus	NC_030815.1.tRNA2316-GluCTC	NC_030815.1	57280676	57280749	+	11	-23.7	61.8	-0.095027397	56	0.001293661	0.066934404	-0.2934	0	12	inactive	-0.907910896	True
Capra_hircus	NC_030815.1.tRNA3112-TrpCCA	NC_030815.1	72918856	72918928	+	40	-21	64.9	0	191	0.024611399	0.533943555	-0.16655	0	9	inactive	-0.570363521	True
Capra_hircus	NC_030815.1.tRNA6570-AlaAGC	NC_030815.1	80360650	80360723	-	12	-16.7	54.7	-0.070534247	47	0.002587322	0.225008036	-0.8114	0	0	inactive	-0.939126152	True
Capra_hircus	NC_030815.1.tRNA7165-AsnGTT	NC_030815.1	70726844	70726917	-	22	-22.7	61.1	0.077808219	158	0.006468305	0.164705882	-0.0037	0	2	inactive	-0.936480665	True
Capra_hircus	NC_030815.1.tRNA7414-CysGCA	NC_030815.1	67241124	67241196	-	38	-20.2	64.1	-0.288763889	351	0.016839378	0.13368984	-0.5704	0	2	inactive	-0.872692902	True
Capra_hircus	NC_030815.1.tRNA7425-GluCTC	NC_030815.1	67130934	67131007	-	11	-18.6	61	-0.005356164	119	0.010349288	0.1421416	-0.4203	0	0	inactive	-0.916856817	True
Capra_hircus	NC_030815.1.tRNA7759-AsnATT	NC_030815.1	60355423	60355496	-	2	-15.2	56	-0.113835616	219	0.002587322	0.095706864	-0.0825	0	14	inactive	-0.926556062	True
Capra_hircus	NC_030815.1.tRNA7961-SerGGA	NC_030815.1	55067288	55067361	-	27	-13.9	58.1	?	236	0.010349288	0.134615385	-0.146333333	0	0	inactive	-0.943499986	True
Capra_hircus	NC_030816.1.tRNA1144-SerGGA	NC_030816.1	23016609	23016681	+	27	-19.4	60.6	0	235	0.007772021	0	-0.0745	0	0	inactive	-0.966307381	True
Capra_hircus	NC_030816.1.tRNA1420-LeuCAA	NC_030816.1	29349548	29349630	+	2	-27.4	64.2	0.037926829	351	0.001278772	0.073902027	-0.08855	0	8	inactive	-0.823630254	True
Capra_hircus	NC_030816.1.tRNA2086-TrpCCA	NC_030816.1	46649956	46650029	+	40	-12.5	55	0	247	0.010349288	0.237569998	0.06855	0	2	inactive	-0.965293516	True
Capra_hircus	NC_030816.1.tRNA209-AlaTGC	NC_030816.1	4474717	4474789	+	13	-25.4	73.9	-0.294083333	26	0.006476684	0.065031587	-0.7143	0	2	inactive	-0.862913992	True
Capra_hircus	NC_030816.1.tRNA2897-MetCAT	NC_030816.1	62641951	62642024	+	11	-18.4	57.3	-0.002178082	213	0.005174644	0.096711799	-0.0404	0	0	inactive	-0.9443855	True
Capra_hircus	NC_030816.1.tRNA3243-LeuTAA	NC_030816.1	68644713	68644796	+	2	-32.3	88.1	1.249710843	6	0.106002554	1.158068883	-1.00535	0	8	active	0.887142867	True
Capra_hircus	NC_030816.1.tRNA481-AlaTGC	NC_030816.1	9950224	9950297	+	13	-20.1	58.7	0.006246575	155	0.009055627	0.241545894	-0.1409	0	0	inactive	-0.93738128	True
Capra_hircus	NC_030816.1.tRNA5067-GluTTC	NC_030816.1	82474334	82474407	-	38	-22.7	61.4	-0.020479452	351	0.02457956	0.233957219	-0.9815	0	26	inactive	-0.709622904	True
Capra_hircus	NC_030816.1.tRNA5106-TrpCCA	NC_030816.1	81794093	81794166	-	40	-19.6	59	0.028287671	143	0.014230272	0.374331551	-0.4181	0	23	inactive	-0.921612284	True
Capra_hircus	NC_030816.1.tRNA564-SerAGA	NC_030816.1	11267789	11267873	+	6	-22.6	65.2	0	269	0.021683673	0.240137221	-0.06025	0	12	inactive	-0.71236299	True
Capra_hircus	NC_030816.1.tRNA5930-TrpCCA	NC_030816.1	68630391	68630464	-	40	-19.5	66.3	0.028273973	43	0.005174644	0.080183276	0.1206	0	7	inactive	-0.950819876	True
Capra_hircus	NC_030816.1.tRNA644-GluCTC	NC_030816.1	12777123	12777195	+	11	-26.4	73.2	1.158333333	7	0.04015544	1.061621967	-3.4474	0	8	active	0.977348821	True
Capra_hircus	NC_030816.1.tRNA693-TrpCCA	NC_030816.1	13488205	13488278	+	40	-13.9	62.1	0	148	0.018111255	0.619469027	-0.0003	0	2	inactive	-0.64912204	True
Capra_hircus	NC_030816.1.tRNA7223-PheGAA	NC_030816.1	40870619	40870692	-	12	-20.2	75.3	?	351	0.005174644	0.09754738	0.121666667	0	2	inactive	-0.903079624	True
Capra_hircus	NC_030816.1.tRNA7233-HisGTG	NC_030816.1	40606871	40606943	-	13	-19.3	52.8	?	320	0.018134715	0.112830432	?	0	6	inactive	-0.744965902	True
Capra_hircus	NC_030816.1.tRNA7545-MetCAT	NC_030816.1	33433744	33433817	-	11	-23.3	73.5	-0.016479452	8	0.003880983	0.125718391	-0.49535	0	3	inactive	-0.886058254	True
Capra_hircus	NC_030816.1.tRNA7701-SerGGA	NC_030816.1	29954426	29954498	-	27	-19.8	65.5	?	351	0.007772021	0.213414634	0.087571429	0	3	inactive	-0.942139872	True
Capra_hircus	NC_030816.1.tRNA8628-AlaAGC	NC_030816.1	9271586	9271659	-	12	-17.8	57.5	-0.292424658	351	0.018111255	0.315552216	-0.22225	0	15	inactive	-0.862696505	True
Capra_hircus	NC_030817.1.tRNA1744-LysCTT	NC_030817.1	32681242	32681315	+	14	-30.1	88	1.243808219	9	0.029754204	0.830039526	-3.8642	0	44	active	0.986753474	True
Capra_hircus	NC_030817.1.tRNA2027-HisGTG	NC_030817.1	37952505	37952577	+	13	-25.5	60.1	1.435527778	30	0.062176166	0.917280917	-0.0151	2	69	active	0.947276985	True
Capra_hircus	NC_030817.1.tRNA3380-SerGCT	NC_030817.1	66892433	66892515	+	9	-30.7	88.4	1.551987805	8	0.046035806	0.883838384	-1.30915	0	34	active	0.983265034	True
Capra_hircus	NC_030817.1.tRNA3630-SerGGA	NC_030817.1	72617991	72618064	+	27	-13.8	59.3	-0.298273973	211	0.012936611	0	-0.0647	0	38	inactive	-0.942208314	True
Capra_hircus	NC_030817.1.tRNA3818-LeuAAG	NC_030817.1	76486731	76486813	+	4	-30.7	74.8	1.184207317	8	0.037084399	0.553972776	-2.1844	2	7	active	0.98334478	True
Capra_hircus	NC_030817.1.tRNA3819-LeuAAG	NC_030817.1	76495746	76495828	+	4	-30.7	74.8	1.184207317	5	0.051150895	0.654664484	-3.60065	4	8	active	0.986281585	True
Capra_hircus	NC_030817.1.tRNA3821-LeuTAG	NC_030817.1	76506091	76506173	+	3	-31.8	74.5	0.895963415	8	0.024296675	0.525	-3.59345	4	10	active	0.949337883	True
Capra_hircus	NC_030817.1.tRNA3822-ProTGG	NC_030817.1	76511500	76511572	+	3	-29.5	74.9	0.305236111	6	0.037564767	0.496665248	-3.65675	2	10	active	0.954480911	True
Capra_hircus	NC_030817.1.tRNA3823-ThrTGT	NC_030817.1	76559517	76559590	+	9	-30.4	78	1.375753425	20	0.037516171	0.294612795	-4.832	2	11	active	0.948592225	True
Capra_hircus	NC_030817.1.tRNA3824-TyrGTA	NC_030817.1	76560696	76560786	+	16	-32	72.6	0.898273973	11	0.034177215	0.532537453	-3.08785	2	12	active	0.985969835	True
Capra_hircus	NC_030817.1.tRNA3825-ProTGG	NC_030817.1	76561901	76561973	+	3	-29.5	70.3	1.440638889	6	0.04015544	0.436953808	-4.2576	2	13	active	0.948969027	True
Capra_hircus	NC_030817.1.tRNA3965-ArgACG	NC_030817.1	79510694	79510767	+	2	-25.4	67.6	1.504520548	14	0.041397154	0.846153846	-3.2972	0	93	active	0.950210956	True
Capra_hircus	NC_030817.1.tRNA404-LysTTT	NC_030817.1	7737380	7737453	+	21	-18.8	64.1	0.049821918	351	0.006468305	0.316455696	0.00495	0	1	inactive	-0.919411591	True
Capra_hircus	NC_030817.1.tRNA4357-TyrGTA	NC_030817.1	87078592	87078683	+	16	-27.9	69.6	0.011287671	351	0.007585335	0.16025641	-0.4818	0	13	inactive	-0.869584033	True
Capra_hircus	NC_030817.1.tRNA4441-GlnCTG	NC_030817.1	88527236	88527308	+	14	-24.7	71.5	1.469277778	13	0.042746114	0.668850669	-2.61585	0	25	active	0.988393973	True
Capra_hircus	NC_030817.1.tRNA4481-GlyTCC	NC_030817.1	89131171	89131244	+	20	-16	60.5	0.02839726	78	0.014230272	0.257731959	-0.13295	0	37	inactive	-0.901807069	True
Capra_hircus	NC_030817.1.tRNA4699-ArgTCG	NC_030817.1	92938302	92938375	+	4	-22.5	54.4	0.033849315	82	0.006468305	0.063199711	-0.02675	0	14	inactive	-0.907809268	True
Capra_hircus	NC_030817.1.tRNA505-LysCTT	NC_030817.1	10018775	10018848	+	14	-22.7	65.7	-0.016013699	351	0.01164295	0.07772596	0.12125	0	0	inactive	-0.959307926	True
Capra_hircus	NC_030817.1.tRNA5061-LysTTT	NC_030817.1	100831430	100831503	+	21	-10.7	60.3	-0.045739726	127	0.002587322	0.123239437	-0.28165	0	1	inactive	-0.946151191	True
Capra_hircus	NC_030817.1.tRNA521-LysTTT	NC_030817.1	10233911	10233984	+	21	-29.6	69	0.117178082	40	0.019404916	0.557029178	-0.5575	0	11	active	0.815179769	True
Capra_hircus	NC_030817.1.tRNA6320-LeuTAG	NC_030817.1	76538818	76538900	-	3	-32.4	76.2	0.005304878	3	0.033248082	0.540865385	-2.07445	4	13	active	0.892216806	True
Capra_hircus	NC_030817.1.tRNA6321-LeuAAG	NC_030817.1	76537192	76537274	-	4	-30.7	73.8	0.33702439	7	0.034526854	0.441919192	-1.47225	5	13	active	0.969803629	True
Capra_hircus	NC_030817.1.tRNA6322-TyrGTA	NC_030817.1	76533919	76534009	-	16	-29.3	72.6	0.056630137	14	0.024050633	0.402761795	-0.7409	5	11	active	0.779726535	True
Capra_hircus	NC_030817.1.tRNA6323-TyrGTA	NC_030817.1	76533252	76533342	-	16	-27.9	72.4	0.055561644	14	0.013924051	0.183582481	-0.1207	5	11	inactive	-0.775886286	True
Capra_hircus	NC_030817.1.tRNA6324-TyrGTA	NC_030817.1	76530480	76530571	-	16	-25	67.3	0.193232877	14	0.018963338	0.120689655	-0.2101	5	12	inactive	-0.541933279	True
Capra_hircus	NC_030817.1.tRNA6325-TyrGTA	NC_030817.1	76528665	76528755	-	16	-29.5	75.4	0.058219178	14	0.046835443	0.617732558	-0.87825	4	12	active	0.947756934	True
Capra_hircus	NC_030817.1.tRNA6327-ThrTGT	NC_030817.1	76509872	76509945	-	9	-29.7	78.8	0.217342466	41	0.033635188	0.648748842	-3.18905	2	9	active	0.961586547	True
Capra_hircus	NC_030817.1.tRNA6328-ThrTGT	NC_030817.1	76499774	76499847	-	9	-29.7	78.8	1.255712329	9	0.040103493	0.492264416	-3.7856	4	8	active	0.985427586	True
Capra_hircus	NC_030817.1.tRNA6329-ProAGG	NC_030817.1	76499374	76499446	-	6	-29.5	70.2	1.118180556	48	0.049222798	0.74484767	-4.3639	4	8	active	0.965025704	True
Capra_hircus	NC_030817.1.tRNA6330-ProAGG	NC_030817.1	76494774	76494846	-	6	-29.5	70.2	0.898305556	6	0.029792746	0.866479617	-3.5753	4	8	active	0.984468642	True
Capra_hircus	NC_030817.1.tRNA6348-ThrTGT	NC_030817.1	76091070	76091143	-	9	-30.4	78	1.340452055	20	0.033635188	0.248968559	-4.82135	0	14	active	0.929209911	True
Capra_hircus	NC_030817.1.tRNA7211-SerGGA	NC_030817.1	56348324	56348396	-	27	-20	65.8	-0.098212121	351	0.006476684	0.115740741	0.13125	0	24	inactive	-0.958251463	True
Capra_hircus	NC_030817.1.tRNA7232-GlyCCC	NC_030817.1	56041891	56041964	-	37	-20.4	60.3	0.100041096	116	0.002587322	0.071721311	-0.04895	0	7	inactive	-0.940065008	True
Capra_hircus	NC_030817.1.tRNA8065-HisGTG	NC_030817.1	37951775	37951847	-	13	-25.5	60.1	1.554083333	33	0.058290155	0.879589161	-0.2541	2	70	active	0.952323987	True
Capra_hircus	NC_030817.1.tRNA8066-HisGTG	NC_030817.1	37950211	37950283	-	13	-25.5	60.1	1.451069444	34	0.042746114	0.562442608	0.38425	2	72	active	0.944417092	True
Capra_hircus	NC_030817.1.tRNA8148-CysGCA	NC_030817.1	36180954	36181027	-	38	-15.2	60.2	0.033726027	328	0.007761966	0.103427896	-0.2285	0	20	inactive	-0.973936792	True
Capra_hircus	NC_030817.1.tRNA8211-SerGCT	NC_030817.1	35316055	35316137	-	9	-30.7	85.2	0.102512195	28	0.019181586	0.150645624	-0.1067	0	19	active	0.560615616	True
Capra_hircus	NC_030817.1.tRNA8357-GlyTCC	NC_030817.1	31837516	31837588	-	20	-18.6	55	?	10	0.011658031	0.339393939	0.120666667	0	0	inactive	-0.794058214	True
Capra_hircus	NC_030817.1.tRNA8527-CysGCA	NC_030817.1	28331688	28331760	-	38	-19.5	63.5	?	187	0.007772021	0.108695652	-0.43975	0	0	inactive	-0.948921431	True
Capra_hircus	NC_030817.1.tRNA8826-GlyCCC	NC_030817.1	22426673	22426746	-	37	-17.8	52	-0.015369863	68	0.012936611	0.209180014	-0.4139	0	22	inactive	-0.960445166	True
Capra_hircus	NC_030817.1.tRNA8834-GlyTCC	NC_030817.1	22311381	22311454	-	20	-21.5	65.4	-0.010068493	351	0.009055627	0.194013304	-0.2713	0	5	inactive	-0.957100386	True
Capra_hircus	NC_030817.1.tRNA9005-ValTAC	NC_030817.1	19176529	19176601	-	5	-21.3	59.2	-0.086611111	53	0.002590674	0.065876153	-0.2082	0	11	inactive	-0.91207484	True
Capra_hircus	NC_030817.1.tRNA9047-GluTTC	NC_030817.1	18574609	18574681	-	38	-15.5	58.6	-0.169611111	92	0.00388601	0.133511348	0.05335	0	45	inactive	-0.924955586	True
Capra_hircus	NC_030818.1.tRNA10218-AlaTGC	NC_030818.1	15938131	15938203	-	13	-20.2	55.8	-0.051611111	74	0.019430052	0.513497653	-0.44485	0	28	inactive	-0.601915863	True
Capra_hircus	NC_030818.1.tRNA1367-IleTAT	NC_030818.1	25025545	25025638	+	2	-30.2	73.2	1.373635135	6	0.085750315	0.863333333	0.18225	0	25	active	0.907283242	True
Capra_hircus	NC_030818.1.tRNA2523-GlyCCC	NC_030818.1	48176978	48177051	+	37	-19.5	66	0.094369863	351	0.007761966	0.111111111	0.1376	0	8	inactive	-0.95432059	True
Capra_hircus	NC_030818.1.tRNA3035-GlyCCC	NC_030818.1	59692039	59692112	+	37	-19.5	66.6	0.077808219	187	0.003880983	0.25107604	0.12165	0	42	inactive	-0.943154074	True
Capra_hircus	NC_030818.1.tRNA3383-SerGGA	NC_030818.1	66391356	66391429	+	27	-13.9	62.2	?	215	0.01164295	0.25	?	0	10	inactive	-0.932360827	True
Capra_hircus	NC_030818.1.tRNA5420-SerGGA	NC_030818.1	101851501	101851574	+	27	-13.2	60.1	0	192	0.009055627	0.151679307	0.10905	0	43	inactive	-0.974332508	True
Capra_hircus	NC_030818.1.tRNA5998-ArgTCT	NC_030818.1	98478384	98478475	-	12	-31.3	70.1	0.228849315	2	0.073324905	0.926315789	-2.4922	0	87	active	0.981809641	True
Capra_hircus	NC_030818.1.tRNA7486-TyrGTA	NC_030818.1	72307434	72307523	-	16	-30	77.9	1.545972603	12	0.045627376	0.593220339	-3.76415	1	76	active	0.98850311	True
Capra_hircus	NC_030818.1.tRNA7487-AlaAGC	NC_030818.1	72307012	72307085	-	12	-32	59.7	1.556726027	5	0.058214748	0.805921053	-2.6924	1	76	active	0.987445198	True
Capra_hircus	NC_030818.1.tRNA7660-GlyCCC	NC_030818.1	68279300	68279371	-	37	-31.4	75.1	1.21756338	5	0.050583658	1.142723881	-3.79105	0	38	active	0.925221007	True
Capra_hircus	NC_030818.1.tRNA7906-ValTAC	NC_030818.1	63420718	63420791	-	5	-25.3	61.9	0.046342466	72	0.010349288	0.19640853	-0.24515	0	9	inactive	-0.882294989	True
Capra_hircus	NC_030818.1.tRNA8513-GluCTC	NC_030818.1	49458294	49458367	-	11	-18.7	54.9	0.050287671	39	0.021992238	0.634057971	-0.27665	0	15	inactive	-0.614247968	True
Capra_hircus	NC_030818.1.tRNA9598-GluTTC	NC_030818.1	29109296	29109369	-	38	-27.2	70	0.042643836	35	0.009055627	0.280448718	-0.1312	0	27	inactive	-0.877325145	True
Capra_hircus	NC_030818.1.tRNA9698-AlaAGC	NC_030818.1	26807383	26807455	-	12	-22.7	53.6	0.05475	8	0.007772021	0.173295923	0.12265	0	8	inactive	-0.914402099	True
Capra_hircus	NC_030819.1.tRNA1045-PheGAA	NC_030819.1	17011209	17011282	+	12	-21.9	88.9	1.010136986	9	0.069857697	0.712250712	-2.74245	0	29	active	0.987683549	True
Capra_hircus	NC_030819.1.tRNA1991-ArgCCT	NC_030819.1	38554913	38554986	+	19	-19.4	52.4	0.000589041	78	0.007761966	0.046635576	0.1389	0	6	inactive	-0.925610031	True
Capra_hircus	NC_030819.1.tRNA2430-LysTTT	NC_030819.1	51904302	51904375	+	21	-28	87.4	-0.188835616	35	0.006468305	0.185577943	-0.4155	0	0	inactive	-0.692200669	True
Capra_hircus	NC_030819.1.tRNA3237-iMetCAT	NC_030819.1	64962335	64962407	+	11	-26.1	60.4	0.493402778	11	0.012953368	0.192043896	-2.577894737	0	29	inactive	-0.627149228	True
Capra_hircus	NC_030819.1.tRNA3386-GlyTCC	NC_030819.1	66954704	66954777	+	20	-25	56.4	0.092657534	72	0.007761966	0.176544767	0.0258	0	2	inactive	-0.885556878	True
Capra_hircus	NC_030819.1.tRNA3419-ValTAC	NC_030819.1	67354796	67354869	+	5	-18.8	57.2	-0.003547945	51	0.019404916	0.440568243	-0.42865	0	23	inactive	-0.669871849	True
Capra_hircus	NC_030819.1.tRNA3642-ArgCCT	NC_030819.1	70321189	70321261	+	19	-15.5	55.6	-0.158458333	108	0.006476684	0.262526253	-0.2095	0	28	inactive	-0.890780365	True
Capra_hircus	NC_030819.1.tRNA3743-GluTTC	NC_030819.1	71451636	71451708	+	38	-26.7	71.2	1.566111111	10	0.067357513	1.05298913	-4.4466	0	16	active	0.925510174	True
Capra_hircus	NC_030819.1.tRNA4024-GluTTC	NC_030819.1	75261867	75261939	+	38	-24.8	70.4	1.471694444	11	0.106217617	0.964054538	-1.88605	0	18	active	0.932751355	True
Capra_hircus	NC_030819.1.tRNA5484-GlyTCC	NC_030819.1	65985294	65985367	-	20	-23.4	55.8	-0.020876712	351	0.012936611	0.067385445	-0.3091	0	5	inactive	-0.951658904	True
Capra_hircus	NC_030819.1.tRNA5855-GluTTC	NC_030819.1	60771100	60771172	-	38	-22.5	65.4	-0.133625	72	0.007772021	0.694444444	-0.0761	0	7	inactive	-0.539104037	True
Capra_hircus	NC_030819.1.tRNA6065-AsnGTT	NC_030819.1	56542916	56542990	-	22	-26.4	80.9	1.199797297	6	0.093023256	0.863970588	-2.04385	0	14	active	0.982522679	True
Capra_hircus	NC_030819.1.tRNA6313-GlyTCC	NC_030819.1	52877525	52877598	-	20	-24.3	70.1	0.078328767	84	0.005174644	0.213675214	0.02495	0	31	inactive	-0.919829475	True
Capra_hircus	NC_030819.1.tRNA8192-GlyCCC	NC_030819.1	9906755	9906828	-	37	-23.5	68.8	-0.017671233	70	0.01164295	0.378787879	0.12145	0	20	inactive	-0.868348581	True
Capra_hircus	NC_030820.1.tRNA151-ValTAC	NC_030820.1	4438493	4438566	+	5	-18.6	59.9	-0.153684932	29	0.005174644	0.211864407	-0.29635	0	1	inactive	-0.880583088	True
Capra_hircus	NC_030820.1.tRNA1763-TrpCCA	NC_030820.1	34704570	34704643	+	40	-23.3	60.3	-1.054283019	275	0.018111255	0.191885965	-1.61835	0	15	inactive	-0.731604319	True
Capra_hircus	NC_030820.1.tRNA2212-TrpCCA	NC_030820.1	43186015	43186087	+	40	-19.5	69.2	0.002208333	131	0.005181347	0.189959294	0.12055	0	35	inactive	-0.95955153	True
Capra_hircus	NC_030820.1.tRNA2415-TrpCCA	NC_030820.1	48514574	48514647	+	40	-13.9	57.6	0	328	0.005174644	0.137578616	0	0	0	inactive	-0.96807923	True
Capra_hircus	NC_030820.1.tRNA2482-SupTCA	NC_030820.1	50907606	50907677	+	5	-19.3	53.9	0.058140845	195	0.006485084	0.202234206	0.0428	0	65	inactive	-0.949793017	True
Capra_hircus	NC_030820.1.tRNA3161-MetCAT	NC_030820.1	64266435	64266508	+	11	-20.5	61.1	0.011684932	351	0.009055627	0.21141649	0.07415	0	51	inactive	-0.961025304	True
Capra_hircus	NC_030820.1.tRNA3258-GluTTC	NC_030820.1	65486870	65486942	+	38	-20.8	65.6	-0.147944444	351	0.018134715	0.436953808	-0.41965	0	43	inactive	-0.673535307	True
Capra_hircus	NC_030820.1.tRNA3678-TrpCCA	NC_030820.1	71759552	71759625	+	40	-25.3	51.4	-0.11569863	74	0.010349288	0.140712946	0.121	0	57	inactive	-0.886678149	True
Capra_hircus	NC_030820.1.tRNA4721-SerGCT	NC_030820.1	77562682	77562764	-	9	-30.7	88.4	0.09904878	55	0.054987212	0.766242938	-0.5072	0	21	active	0.891444178	True
Capra_hircus	NC_030820.1.tRNA6250-SerGGA	NC_030820.1	53370979	53371051	-	27	-23.2	64.4	?	323	0.015544041	0.091348036	-0.7506	0	93	inactive	-0.929204578	True
Capra_hircus	NC_030820.1.tRNA6687-TrpCCA	NC_030820.1	42365121	42365193	-	40	-21.2	67.6	?	189	0.007772021	0.102880658	-0.286666667	0	37	inactive	-0.943506855	True
Capra_hircus	NC_030820.1.tRNA7930-SerGGA	NC_030820.1	23130150	23130223	-	27	-13.9	63.2	?	37	0.015523933	0.050244042	-0.6085	0	6	inactive	-0.922489763	True
Capra_hircus	NC_030820.1.tRNA7955-AsnGTT	NC_030820.1	22754842	22754916	-	22	-26.4	80.9	1.371540541	8	0.072351421	0.882352941	-3.4411	0	1	active	0.969512149	True
Capra_hircus	NC_030820.1.tRNA8461-GlyTCC	NC_030820.1	13447898	13447970	-	20	-18.1	53.1	?	11	0.010362694	0.198920148	0.205583333	0	0	inactive	-0.886391908	True
Capra_hircus	NC_030820.1.tRNA8916-PheGAA	NC_030820.1	3199498	3199571	-	12	-14.8	60.9	?	187	0.009055627	0.145833333	-0.205	0	7	inactive	-0.912778572	True
Capra_hircus	NC_030821.1.tRNA1576-TrpCCA	NC_030821.1	32675899	32675972	+	40	-13.9	63.2	0	227	0.005174644	0	0.0777	0	0	inactive	-0.959932636	True
Capra_hircus	NC_030821.1.tRNA2494-GlyCCC	NC_030821.1	48411783	48411856	+	37	-27	64.7	0.122328767	85	0.007761966	0.115226337	-0.11575	0	1	inactive	-0.898466139	True
Capra_hircus	NC_030821.1.tRNA2666-ArgCCT	NC_030821.1	51191278	51191351	+	19	-20	58.6	0.055547945	104	0.005174644	0	-0.1046	0	6	inactive	-0.932081128	True
Capra_hircus	NC_030821.1.tRNA3377-MetCAT	NC_030821.1	63578385	63578458	+	11	-24.4	73.5	0.235958904	6	0.001293661	0.072553897	-1.25305	0	0	inactive	-0.822100805	True
Capra_hircus	NC_030821.1.tRNA3486-UndetNNN	NC_030821.1	65482056	65482129	+	4	-16.2	55.9	-0.00530137	126	0.005174644	0.334768054	0.1834	0	38	inactive	-0.906546078	True
Capra_hircus	NC_030821.1.tRNA534-SerAGA	NC_030821.1	10749659	10749741	+	6	-27.2	62.2	?	279	0.017902813	0.176767677	-0.656555556	0	2	inactive	-0.669337153	True
Capra_hircus	NC_030821.1.tRNA5997-MetCAT	NC_030821.1	65402563	65402636	-	11	-25	82.3	0.941986301	6	0.063389392	0.697047798	-2.11505	0	34	active	0.984637561	True
Capra_hircus	NC_030821.1.tRNA6511-GluTTC	NC_030821.1	56054795	56054867	-	38	-21.9	62.3	-0.128416667	351	0.005181347	0.091575092	0.14735	0	9	inactive	-0.940807662	True
Capra_hircus	NC_030821.1.tRNA6808-TyrGTA	NC_030821.1	51645914	51646008	-	16	-31.4	74.9	0.817657534	11	0.06675063	0.836320191	-3.0597	2	20	active	0.987227968	True
Capra_hircus	NC_030821.1.tRNA6809-TyrGTA	NC_030821.1	51645342	51645431	-	16	-31.7	75.5	1.146876712	11	0.063371356	0.962541489	-3.73895	2	20	active	0.987885222	True
Capra_hircus	NC_030821.1.tRNA6810-AlaAGC	NC_030821.1	51645136	51645209	-	12	-32	59.7	1.561972603	1	0.04915912	0.892401836	-1.24355	2	20	active	0.982719551	True
Capra_hircus	NC_030821.1.tRNA8428-AlaTGC	NC_030821.1	21140059	21140132	-	13	-20.3	60.7	-0.044068493	128	0.010349288	0.204081633	-0.11435	0	19	inactive	-0.953890163	True
Capra_hircus	NC_030821.1.tRNA850-SerGGA	NC_030821.1	17260540	17260613	+	27	-12.2	60.2	-0.016232877	190	0.009055627	0.218023256	0.12115	0	6	inactive	-0.971422602	True
Capra_hircus	NC_030821.1.tRNA8902-SerAGA	NC_030821.1	13155028	13155110	-	6	-32.8	89.6	1.264146341	11	0.058823529	0.497159091	-0.880529412	0	6	active	0.975202657	True
Capra_hircus	NC_030822.1.tRNA1041-GluTTC	NC_030822.1	18825701	18825773	+	38	-13.4	59.9	-0.012680556	190	0.006476684	0.105389943	0.0248	0	2	inactive	-0.961112724	True
Capra_hircus	NC_030822.1.tRNA1124-LysCTT	NC_030822.1	20278540	20278627	+	14	-19.6	56.7	0.033862069	4	0.008894536	0.263951735	0.04065	0	14	inactive	-0.867534108	True
Capra_hircus	NC_030822.1.tRNA1474-ProTGG	NC_030822.1	27272531	27272603	+	3	-28.9	70.5	1.500152778	3	0.080310881	1.010225961	-4.4629	1	8	active	0.933099323	True
Capra_hircus	NC_030822.1.tRNA1544-GlyCCC	NC_030822.1	29170144	29170217	+	37	-25	63.4	0.069027397	209	0.003880983	0.108225108	0.0093	0	21	inactive	-0.969635265	True
Capra_hircus	NC_030822.1.tRNA1757-IleAAT	NC_030822.1	33149320	33149394	+	5	-22	55	-0.072675676	7	0.002583979	0	0.03985	0	17	inactive	-0.898450201	True
Capra_hircus	NC_030822.1.tRNA2722-GlyCCC	NC_030822.1	52605906	52605979	+	37	-25.1	55.8	0.011849315	108	0.005174644	0.107924761	-0.073	0	97	inactive	-0.94005559	True
Capra_hircus	NC_030822.1.tRNA291-TrpCCA	NC_030822.1	5292286	5292359	+	40	-13.2	59	0.011561644	351	0.019404916	0.111146396	0.03695	0	0	inactive	-0.882724425	True
Capra_hircus	NC_030822.1.tRNA3326-SerGGA	NC_030822.1	66338961	66339034	+	27	-17.7	54.1	0	199	0.01164295	0.109529025	-0.2485	0	11	inactive	-0.97273342	True
Capra_hircus	NC_030822.1.tRNA38-PheGAA	NC_030822.1	731196	731269	+	12	-21.9	87.9	0.200082192	4	0.015523933	0.122078828	-4.24305	3	37	active	0.566623191	True
Capra_hircus	NC_030822.1.tRNA3869-GlyTCC	NC_030822.1	81215420	81215491	+	20	-14.3	54.6	0.022746479	260	0.005188067	0.160845588	-0.00715	0	11	inactive	-0.95960414	True
Capra_hircus	NC_030822.1.tRNA39-LysTTT	NC_030822.1	735866	735939	+	21	-27.5	87.8	1.219452055	10	0.130659767	0.947995666	-4.17325	6	33	active	0.936573783	True
Capra_hircus	NC_030822.1.tRNA40-PheGAA	NC_030822.1	736665	736738	+	12	-21.9	87.9	1.120890411	4	0.068564036	1.044354839	-3.14885	6	31	active	0.988127744	True
Capra_hircus	NC_030822.1.tRNA41-ValTAC	NC_030822.1	743236	743309	+	5	-23.6	80.5	1.069123288	19	0.12160414	0.923361034	-3.0874	5	27	active	0.933530655	True
Capra_hircus	NC_030822.1.tRNA432-GluTTC	NC_030822.1	7979150	7979224	+	38	-19	58.8	-0.084418919	138	0.016795866	0	-0.18395	0	17	inactive	-0.949300916	True
Capra_hircus	NC_030822.1.tRNA5715-TrpCCA	NC_030822.1	40417996	40418069	-	40	-23.9	55.3	0.033876712	119	0.006468305	0.066692073	0.03925	0	52	inactive	-0.951068041	True
Capra_hircus	NC_030822.1.tRNA6134-GlyCCC	NC_030822.1	31618520	31618593	-	37	-23.4	72	-0.010246575	351	0.009055627	0.233905101	-0.0269	0	62	inactive	-0.968429483	True
Capra_hircus	NC_030822.1.tRNA6239-GluTTC	NC_030822.1	29444269	29444341	-	38	-17.2	62.6	0.099694444	136	0.006476684	0.227125243	0.04445	0	46	inactive	-0.939653301	True
Capra_hircus	NC_030822.1.tRNA6358-ProAGG	NC_030822.1	27272809	27272881	-	6	-29.5	70.2	1.400861111	3	0.07642487	0.916573139	-4.9031	1	8	active	0.976470726	True
Capra_hircus	NC_030822.1.tRNA6710-ArgCCT	NC_030822.1	20080230	20080303	-	19	-17.4	62.9	0.078027397	99	0.006468305	0.050872093	0.13805	0	7	inactive	-0.91426581	True
Capra_hircus	NC_030822.1.tRNA6863-ValAAC	NC_030822.1	17099374	17099447	-	11	-16.4	54.5	-0.024452055	200	0.016817594	0.351506456	-0.06755	0	11	inactive	-0.866846477	True
Capra_hircus	NC_030822.1.tRNA7697-PheGAA	NC_030822.1	1425914	1425987	-	12	-16.9	73.4	-0.010958904	4	0.028460543	0.298295455	-0.12135	0	25	inactive	-0.655366453	True
Capra_hircus	NC_030822.1.tRNA7730-ArgTCT	NC_030822.1	742874	742960	-	12	-28.4	70.3	1.182205479	1	0.078880407	0.933819223	-2.6729	5	27	active	0.986064117	True
Capra_hircus	NC_030822.1.tRNA7731-LeuTAA	NC_030822.1	742404	742487	-	2	-27.9	80.8	0.055036145	13	0.049808429	0.823301508	-3.4158	5	28	active	0.931690803	True
Capra_hircus	NC_030822.1.tRNA7732-LysTTT	NC_030822.1	737578	737651	-	21	-27.5	83.4	0.89569863	7	0.016817594	0.150645624	-3.6516	6	31	active	0.607604731	True
Capra_hircus	NC_030823.1.tRNA1049-ThrTGT	NC_030823.1	24513443	24513516	+	9	-29.1	84.1	0.422767123	19	0.04915912	0.704225352	-3.2509	0	22	active	0.986766069	True
Capra_hircus	NC_030823.1.tRNA1226-ArgTCT	NC_030823.1	27497399	27497472	+	12	-19.8	60.4	-0.048547945	344	0.007761966	0.153508772	-1.1547	0	56	inactive	-0.958190835	True
Capra_hircus	NC_030823.1.tRNA1592-TyrGTA	NC_030823.1	33749345	33749418	+	16	-14.7	59	-0.032835616	261	0.005174644	0.128676471	-0.60575	0	33	inactive	-0.984871703	True
Capra_hircus	NC_030823.1.tRNA2665-SupCTA	NC_030823.1	52291026	52291098	+	3	-19.5	63.5	0.032416667	308	0.012953368	0.246247655	-0.33325	0	11	inactive	-0.932034937	True
Capra_hircus	NC_030823.1.tRNA3649-TrpCCA	NC_030823.1	69367604	69367677	+	40	-20.4	54.4	0.055712329	233	0.007761966	0.167250717	0.05945	0	28	inactive	-0.975580986	True
Capra_hircus	NC_030823.1.tRNA51-LysTTT	NC_030823.1	1630786	1630859	+	21	-27.5	87.8	0.203702703	8	0.031047865	0.608695652	-3.27845	1	46	active	0.982171471	True
Capra_hircus	NC_030823.1.tRNA6776-CysGCA	NC_030823.1	31141554	31141626	-	38	-19.8	70.9	?	247	0.012953368	0.400457666	-0.2635	0	19	inactive	-0.807112461	True
Capra_hircus	NC_030823.1.tRNA7056-AspGTC	NC_030823.1	26576817	26576889	-	13	-26.7	60	?	11	0.014248705	0.269541779	-0.066545455	0	8	inactive	-0.774387228	True
Capra_hircus	NC_030823.1.tRNA7067-LysCTT	NC_030823.1	26331345	26331414	-	14	-16.6	54.5	-0.015463768	351	0.00390117	0.080348944	0.12145	0	5	inactive	-0.965948787	True
Capra_hircus	NC_030823.1.tRNA7096-GlyCCC	NC_030823.1	25762699	25762772	-	37	-16.3	57.1	0.044109589	151	0.009055627	0.263792584	-0.04125	0	7	inactive	-0.951163939	True
Capra_hircus	NC_030823.1.tRNA7894-LysTTT	NC_030823.1	8335293	8335366	-	21	-17.8	70.4	0.099465753	202	0.003880983	0.112323492	0.01155	0	0	inactive	-0.91741454	True
Capra_hircus	NC_030823.1.tRNA8145-LysTTT	NC_030823.1	1631129	1631202	-	21	-27.5	87.8	1.298671233	6	0.063389392	1.189953937	-3.7119	1	45	active	0.988507995	True
Capra_hircus	NC_030824.1.tRNA1428-AlaTGC	NC_030824.1	20327127	20327199	+	13	-26.5	78.7	0.746861111	1	0.042746114	0.858951175	-3.3099	4	35	active	0.987609921	True
Capra_hircus	NC_030824.1.tRNA1429-ArgTCT	NC_030824.1	20345708	20345781	+	12	-20.9	54.8	-0.031643836	242	0.027166882	0.300094315	0.0624	0	35	inactive	-0.859208006	True
Capra_hircus	NC_030824.1.tRNA1461-TrpCCA	NC_030824.1	20882645	20882718	+	40	-13.4	57	0.093753425	340	0.010349288	0.198863636	-0.970421053	0	6	inactive	-0.966305961	True
Capra_hircus	NC_030824.1.tRNA2701-TrpCCA	NC_030824.1	47006246	47006319	+	40	-16	60.7	0	165	0.006468305	0.102279369	-0.56775	0	1	inactive	-0.961421008	True
Capra_hircus	NC_030824.1.tRNA4139-GlnTTG	NC_030824.1	63077063	63077136	-	5	-25.8	64.7	-0.110958904	351	0.002587322	0	-0.0342	0	4	inactive	-0.876026507	True
Capra_hircus	NC_030824.1.tRNA42-ArgCCT	NC_030824.1	1084246	1084320	+	19	-21.2	57.3	0.057567568	81	0.009043928	0.095942982	-0.31375	0	69	inactive	-0.941606124	True
Capra_hircus	NC_030824.1.tRNA4539-LysTTT	NC_030824.1	56436112	56436187	-	21	-21.7	66.1	-0.196533333	28	0.003870968	0.42042042	-0.11725	0	3	inactive	-0.600392373	True
Capra_hircus	NC_030824.1.tRNA4629-ArgCCT	NC_030824.1	54699646	54699718	-	19	-19	50.2	0.032847222	107	0.010362694	0.10989011	0.1208	0	1	inactive	-0.899741505	True
Capra_hircus	NC_030824.1.tRNA4684-GlyTCC	NC_030824.1	53894970	53895043	-	20	-21.1	65.1	-0.010328767	143	0.006468305	0.25887574	-0.2214	0	26	inactive	-0.909632828	True
Capra_hircus	NC_030824.1.tRNA4816-GluTTC	NC_030824.1	52120764	52120836	-	38	-17.9	62.7	-0.144291667	351	0.006476684	0.206185567	-0.2249	0	5	inactive	-0.930796909	True
Capra_hircus	NC_030824.1.tRNA513-GlyCCC	NC_030824.1	8750064	8750137	+	37	-19.3	69.1	-0.010479452	106	0.002587322	0.070592981	0.11465	0	17	inactive	-0.955365944	True
Capra_hircus	NC_030824.1.tRNA5906-TrpCCA	NC_030824.1	24983072	24983145	-	40	-15	57.9	0.122136986	105	0.009055627	0.129040187	-0.5286	0	14	inactive	-0.958971935	True
Capra_hircus	NC_030824.1.tRNA6309-AspGTC	NC_030824.1	20326793	20326865	-	13	-26.4	66.5	0.733027778	12	0.03626943	0.631944444	-2.7356	4	35	active	0.9874114	True
Capra_hircus	NC_030824.1.tRNA6310-PheGAA	NC_030824.1	20324486	20324559	-	12	-21.9	88.9	1.272260274	6	0.047865459	0.738396624	-2.54845	4	35	active	0.988596681	True
Capra_hircus	NC_030824.1.tRNA6311-AspGTC	NC_030824.1	20323912	20323984	-	13	-26.4	66.5	1.455138889	8	0.038860104	0.681818182	-4.6889	4	35	active	0.988542492	True
Capra_hircus	NC_030824.1.tRNA6312-AlaTGC	NC_030824.1	20320576	20320648	-	13	-26.5	79.7	1.2635	12	0.015544041	0.404063727	-2.96335	4	35	active	0.700186959	True
Capra_hircus	NC_030824.1.tRNA6391-PheGAA	NC_030824.1	19601559	19601632	-	12	-9.5	61.6	0.011027397	351	0.009055627	0.19640853	-0.2793	0	0	inactive	-0.948206852	True
Capra_hircus	NC_030824.1.tRNA6669-TrpCCA	NC_030824.1	16893227	16893300	-	40	-12.3	54.7	0.1	83	0.005174644	0.112830432	0.12005	0	58	inactive	-0.936811636	True
Capra_hircus	NC_030824.1.tRNA6724-TrpCCA	NC_030824.1	15890310	15890383	-	40	-26.3	57.9	-0.006575758	119	0.005174644	0.286885246	0.2105	0	45	inactive	-0.933211345	True
Capra_hircus	NC_030824.1.tRNA7062-GlyCCC	NC_030824.1	10585297	10585370	-	37	-23.9	59.3	0.07069863	102	0.006468305	0.097615395	0.1416	0	16	inactive	-0.961685037	True
Capra_hircus	NC_030824.1.tRNA7211-GlyCCC	NC_030824.1	8706807	8706880	-	37	-22	63.6	0.073082192	160	0.007761966	0.201612903	0.09015	0	19	inactive	-0.965486057	True
Capra_hircus	NC_030824.1.tRNA96-GlyCCC	NC_030824.1	2044648	2044720	+	37	-19.4	61.2	0.096569444	78	0.015544041	0.364583333	0.00575	0	15	inactive	-0.854774611	True
Capra_hircus	NC_030825.1.tRNA105-GlyGCC	NC_030825.1	2674435	2674506	+	11	-26.4	81	0.804690141	12	0.044098573	0.49122807	-0.703	2	28	active	0.958973156	True
Capra_hircus	NC_030825.1.tRNA1170-AlaAGC	NC_030825.1	24928580	24928653	+	12	-26.2	55.2	0.112726027	8	0.016817594	0.217824247	-0.3927	0	8	inactive	-0.800729743	True
Capra_hircus	NC_030825.1.tRNA1202-PheGAA	NC_030825.1	25241297	25241370	+	12	-17.9	69.1	-0.532575342	319	0.009055627	0.127830533	0.0413	0	29	inactive	-0.923307815	True
Capra_hircus	NC_030825.1.tRNA121-GlyGCC	NC_030825.1	3065660	3065731	+	11	-26.4	81	0.931577465	17	0.057068742	0.746606335	-5.28235	0	72	active	0.987221665	True
Capra_hircus	NC_030825.1.tRNA1262-LeuCAG	NC_030825.1	26665146	26665229	+	6	-32.8	77.3	1.058036145	10	0.043422733	0.652376514	-2.4049	1	26	active	0.986469054	True
Capra_hircus	NC_030825.1.tRNA1336-GlyCCC	NC_030825.1	27606831	27606904	+	37	-20	64.3	-0.020863014	150	0.010349288	0.100922722	-0.1927	0	65	inactive	-0.956701093	True
Capra_hircus	NC_030825.1.tRNA1490-GlyCCC	NC_030825.1	30670130	30670203	+	37	-21.4	69	0.068712329	57	0.007761966	0.207900208	0.0389	0	5	inactive	-0.950857661	True
Capra_hircus	NC_030825.1.tRNA1768-SerAGA	NC_030825.1	36651744	36651826	+	6	-19.7	61.4	0.0545	67	0.008951407	0	-0.42065	0	127	inactive	-0.899294624	True
Capra_hircus	NC_030825.1.tRNA2058-GlyCCC	NC_030825.1	43721957	43722030	+	37	-25.5	67.4	-0.037493151	231	0.005174644	0.167250717	-0.7106	0	1	inactive	-0.967255268	True
Capra_hircus	NC_030825.1.tRNA2123-ThrAGT	NC_030825.1	44659039	44659113	+	5	-27.3	82.6	1.500148649	21	0.062015504	0.793938844	-1.56175	0	39	active	0.983483458	True
Capra_hircus	NC_030825.1.tRNA2412-GluTTC	NC_030825.1	48305704	48305776	+	38	-18.6	55.9	-0.0165	35	0	0	-1.28085	0	30	inactive	-0.960360185	True
Capra_hircus	NC_030825.1.tRNA2706-TrpCCA	NC_030825.1	51969483	51969556	+	40	-19.9	55.8	0.049561644	351	0.009055627	0.107099143	-0.1087	0	33	inactive	-0.976006616	True
Capra_hircus	NC_030825.1.tRNA2910-GlyCCC	NC_030825.1	54081992	54082065	+	37	-22.7	59	-0.209013699	351	0.016817594	0.223499361	0.0386	0	99	inactive	-0.898734727	True
Capra_hircus	NC_030825.1.tRNA3067-GluTTC	NC_030825.1	55880279	55880352	+	38	-17.4	61.6	0.006287671	351	0.032341527	0.561797753	-0.26635	0	51	inactive	-0.633814962	True
Capra_hircus	NC_030825.1.tRNA3936-ValCAC	NC_030825.1	62421919	62421992	-	15	-12.6	54.7	-0.021575342	61	0.012936611	0.442701746	0.02005	0	52	inactive	-0.75047287	True
Capra_hircus	NC_030825.1.tRNA4359-iMetCAT	NC_030825.1	55692991	55693063	-	11	-23.7	56.8	0.099777778	9	0.029792746	0.480769231	0.1005	0	44	active	0.753190382	True
Capra_hircus	NC_030825.1.tRNA4384-GluTTC	NC_030825.1	55396387	55396459	-	38	-21.3	62.3	0.016666667	351	0.042746114	0.522700119	-0.2751	0	48	active	0.522484695	True
Capra_hircus	NC_030825.1.tRNA4434-AlaAGC	NC_030825.1	54762918	54762990	-	12	-27.5	83	0.122097222	8	0.007772021	0.070578746	-0.60145	0	36	inactive	-0.702070352	True
Capra_hircus	NC_030825.1.tRNA4491-SeCTCA	NC_030825.1	54137018	54137105	-	5	-37.1	146.9	1.365724138	12	0.029224905	0.729166667	-4.85665	0	66	active	0.983792679	True
Capra_hircus	NC_030825.1.tRNA4853-IleTAT	NC_030825.1	49984167	49984260	-	2	-30.9	73.8	1.379905405	1	0.047919294	0.697463768	0.08745	0	120	active	0.918424367	True
Capra_hircus	NC_030825.1.tRNA5096-ThrTGT	NC_030825.1	47230784	47230857	-	9	-21.8	68.3	0.013739726	122	0	0	-0.3205	0	106	inactive	-0.900941218	True
Capra_hircus	NC_030825.1.tRNA5134-ValCAC	NC_030825.1	46842026	46842098	-	15	-21.9	51.4	0.094722222	100	0.023316062	0.271618625	0.0115	0	57	inactive	-0.604686348	True
Capra_hircus	NC_030825.1.tRNA5437-MetCAT	NC_030825.1	40843508	40843581	-	11	-24	81.2	0.620369863	5	0.069857697	0.95	-1.6226	0	22	active	0.983155628	True
Capra_hircus	NC_030825.1.tRNA6146-LeuCAG	NC_030825.1	26665433	26665516	-	6	-32.8	77.3	1.371722892	10	0.058748404	0.994932641	-4.7487	1	25	active	0.98762327	True
Capra_hircus	NC_030825.1.tRNA7294-GlyGCC	NC_030825.1	2667407	2667478	-	11	-26.4	81	1.250098592	7	0.019455253	0.134680135	-0.8522	2	20	active	0.614097972	True
Capra_hircus	NC_030825.1.tRNA7295-GlyGCC	NC_030825.1	2666749	2666820	-	11	-26.4	81	1.26015493	115	0.025940337	0.114329268	-0.00245	2	20	active	0.584669626	True
Capra_hircus	NC_030825.1.tRNA846-GlyTCC	NC_030825.1	18819177	18819250	+	20	-21.9	60.5	0.02960274	351	0.018111255	0.444983819	-0.25785	0	22	inactive	-0.614483056	True
Capra_hircus	NC_030826.1.tRNA1035-GlyTCC	NC_030826.1	20038339	20038412	+	20	-19.3	66.2	0.033479452	94	0.003880983	0.104493208	-0.06035	0	92	inactive	-0.92281417	True
Capra_hircus	NC_030826.1.tRNA1044-ValCAC	NC_030826.1	20251149	20251222	+	15	-13.2	63.9	0.120287671	97	0.010349288	0.254065041	-0.2932	0	57	inactive	-0.879229802	True
Capra_hircus	NC_030826.1.tRNA1196-GluTTC	NC_030826.1	22376364	22376437	+	38	-20.4	72.1	0.011849315	351	0.01164295	0.092592593	-0.04815	0	62	inactive	-0.963059976	True
Capra_hircus	NC_030826.1.tRNA1485-SerTGA	NC_030826.1	26184531	26184604	+	1	-22.2	63.2	0.005835616	136	0.009055627	0.231061231	-0.2796	0	95	inactive	-0.896918219	True
Capra_hircus	NC_030826.1.tRNA1565-LysTTT	NC_030826.1	27497555	27497628	+	21	-27.5	87.8	1.556369863	5	0.04915912	0.902061856	-5.2651	4	100	active	0.988314926	True
Capra_hircus	NC_030826.1.tRNA1566-GlnCTG	NC_030826.1	27498209	27498281	+	14	-24.7	71.5	1.303722222	5	0.022020725	0.691699605	-4.8621	4	101	active	0.981011717	True
Capra_hircus	NC_030826.1.tRNA1567-ArgTCT	NC_030826.1	27499287	27499374	+	12	-25.6	70.8	1.453260274	1	0.050825921	0.751922207	-0.3946	4	104	active	0.947977612	True
Capra_hircus	NC_030826.1.tRNA1568-GlyGCC	NC_030826.1	27504044	27504115	+	11	-26.4	81	0.929605634	5	0.057068742	0.530176194	-3.61215	6	109	active	0.987214843	True
Capra_hircus	NC_030826.1.tRNA1569-TrpCCA	NC_030826.1	27565683	27565755	+	40	-25.1	73.3	1.470569444	8	0.082901554	0.642201835	-1.9668	3	112	active	0.950446586	True
Capra_hircus	NC_030826.1.tRNA1570-SerGCT	NC_030826.1	27566193	27566275	+	9	-30.7	88.4	1.514621951	27	0.072890026	0.912441568	-4.107	3	113	active	0.988452857	True
Capra_hircus	NC_030826.1.tRNA1571-ThrAGT	NC_030826.1	27566495	27566569	+	5	-27.3	82.6	0.629121622	16	0.050387597	0.874125874	-4.3333	3	114	active	0.986762493	True
Capra_hircus	NC_030826.1.tRNA1572-IleAAT	NC_030826.1	27566958	27567032	+	5	-25.5	81.2	1.543986486	14	0.0374677	0.840724316	-5.7774	3	116	active	0.988239237	True
[truncated: 9,937 more rows]
