# Supplementary material for: Predicting transfer RNA gene activity from sequence and genome context
Source: HighWire-hosted journal article supplement (doi:10.1101/gr.256164.119), 2019-12-19
Supplement: Supplemental_Table_S10.xlsx [file Supplemental_Table_S10.xlsx]

## Sheet: S10
Supplemental Table S10: Distributions of tRNA genes by anticodon by species are shown. The number preceding the comma in each cell refers to the number of predicted active tRNA genes of that type, and the number following the comma refers to the number of predicted inactive tRNA genes of that type. tRNA genes in segmental duplications in all species are excluded, as are human and mouse tRNA genes…
species	AlaAGC	AlaCGC	AlaGGC	AlaTGC	ArgACG	ArgCCG	ArgCCT	ArgGCG	ArgTCG	ArgTCT	AsnATT	AsnGTT	AspATC	AspGTC	CysACA	CysGCA	GlnCTG	GlnTTG	GluCTC	GluTTC	GlyACC	GlyCCC	GlyGCC	GlyTCC	HisATG	HisGTG	IleAAT	IleGAT	IleTAT	LeuAAG	LeuCAA	LeuCAG	LeuTAA	LeuTAG	LysCTT	LysTTT	MetCAT	PheAAA	PheGAA	ProAGG	ProCGG	ProGGG	ProTGG	SeCTCA	SerACT	SerAGA	SerCGA	SerGCT	SerGGA
Aotus_nancymaae	10,4	4,0	0,0	7,1	6,0	4,0	4,0	0,0	4,0	5,0	0,0	15,2	0,0	8,0	0,0	5,14	8,1	4,0	6,0	7,3	0,0	2,1	5,3	5,0	0,0	7,1	8,1	0,0	5,0	6,0	5,0	5,0	2,0	3,0	7,5	9,2	6,0	0,0	8,2	7,1	4,0	0,0	6,0	1,0	0,0	9,0	3,0	8,0	0,0
Bos_taurus	15,14	5,4	0,0	7,11	7,0	5,5	7,27	0,0	5,4	6,5	0,0	23,1	0,2	11,10	0,1	6,33	11,11	6,9	5,3	10,23	0,0	5,31	11,3	7,8	0,0	11,0	9,2	0,0	5,2	8,1	5,3	5,0	5,1	4,0	16,10	10,28	7,9	0,1	12,8	11,1	4,0	0,0	8,0	1,0	0,1	11,1	4,1	12,2	2,13
Chrysochloris_asiatica	9,2	4,1	0,0	5,2	7,0	2,0	5,0	0,0	5,0	4,3	0,0	11,1	0,0	7,0	0,2	5,24	8,2	3,3	6,1	6,2	0,0	4,3	5,5	6,5	0,0	7,0	11,0	0,1	4,0	5,1	4,0	4,0	2,0	3,1	10,5	10,5	6,2	0,1	6,2	8,0	3,0	0,0	4,2	2,1	0,0	8,0	5,0	10,4	0,0
Canis_lupus_familiaris	10,3	4,0	0,0	5,6	4,2	3,0	7,5	0,0	4,0	5,2	0,0	14,0	0,1	9,0	0,0	6,13	8,1	3,2	3,5	9,1	0,0	3,1	8,0	4,2	0,0	6,0	7,1	0,0	5,0	4,0	4,0	4,0	3,0	4,0	10,28	8,2	5,4	0,0	9,1	7,1	4,0	0,0	5,0	1,0	0,0	9,1	4,0	8,0	0,0
Capra_hircus	2,10	1,2	0,1	3,8	2,0	1,1	4,15	0,0	2,2	5,7	1,1	21,1	0,0	6,4	0,2	4,34	7,5	2,3	4,5	13,23	0,0	4,31	8,1	5,13	0,0	12,1	3,2	0,1	2,0	4,0	1,1	4,0	2,0	3,0	5,9	6,15	2,5	0,0	5,7	5,1	2,0	0,0	3,0	1,0	0,0	3,3	2,0	4,5	1,26
Chinchilla_lanigera	8,10	2,1	0,2	5,5	7,0	3,0	5,0	0,0	5,0	5,0	0,0	7,1	0,0	7,1	0,0	19,6	6,0	3,1	3,2	4,0	0,0	2,1	7,3	4,2	0,0	5,0	8,1	0,0	4,0	4,0	4,0	4,0	3,0	2,0	9,0	7,4	3,0	1,0	8,0	8,0	4,0	0,0	4,0	0,0	0,0	7,0	4,0	7,1	0,0
Cavia_porcellus	14,5	4,1	0,0	6,4	7,0	3,0	5,0	0,0	4,0	5,0	0,0	14,1	0,0	9,0	0,0	4,16	7,3	2,2	3,0	6,0	0,0	2,3	4,5	5,1	0,0	4,1	9,0	0,0	4,1	5,0	5,0	3,0	3,0	3,0	12,2	8,3	5,2	0,0	7,1	8,0	3,0	0,0	4,0	1,0	0,0	8,0	4,0	8,0	0,0
Dasypus_novemcinctus	20,1	5,3	0,0	8,12	9,0	3,1	4,8	0,0	8,0	6,1	0,0	21,1	0,0	9,6	0,0	7,14	8,1	5,0	5,13	14,5	0,0	4,36	11,2	4,0	0,0	8,1	10,0	0,0	5,1	5,0	6,0	5,0	4,1	3,0	32,5	11,5	10,1	0,0	11,0	6,0	4,0	0,0	7,0	1,0	0,0	10,0	4,1	10,0	0,0
Equus_caballus	19,5	5,3	0,0	6,4	8,0	4,0	7,0	0,0	4,0	5,0	0,0	10,1	0,0	7,1	0,0	5,17	10,0	5,0	4,5	8,0	0,0	5,1	8,2	4,0	0,0	7,0	15,0	0,0	5,0	7,0	6,0	3,0	4,0	3,2	14,1	9,5	6,4	0,0	11,1	10,0	3,0	0,0	7,0	1,0	0,0	12,0	4,0	10,1	0,0
Erinaceus_europaeus	10,4	4,0	0,0	4,4	6,0	2,1	6,1	0,0	4,0	4,1	0,0	7,0	0,0	13,0	0,0	6,25	3,5	1,3	7,2	8,0	0,0	5,0	9,5	6,1	0,0	5,0	7,1	0,0	4,0	6,0	5,0	5,1	0,1	2,1	96,27	6,4	5,2	0,0	6,2	8,2	3,0	0,0	4,0	1,0	0,0	7,1	3,0	7,0	0,0
Eptesicus_fuscus	8,0	3,0	0,0	3,0	5,0	2,0	4,0	0,0	4,0	4,0	0,0	9,0	0,0	6,0	0,1	5,12	5,1	3,0	5,0	3,0	0,0	4,0	9,0	5,0	0,0	5,0	7,1	0,0	3,0	3,0	3,0	3,0	2,0	2,0	7,0	5,0	4,0	0,0	4,0	6,0	2,0	0,0	4,0	1,0	0,0	5,0	2,0	5,0	0,0
Gorilla_gorilla	13,6	4,0	1,0	8,0	7,0	4,0	6,0	0,0	6,0	6,0	0,1	15,1	0,0	9,0	0,0	7,18	9,4	3,2	5,0	6,0	0,0	6,1	4,1	3,0	0,0	8,1	9,1	0,0	5,0	9,1	5,0	4,0	4,0	3,0	11,2	11,2	7,0	0,0	8,0	7,0	4,0	0,0	6,0	1,1	0,0	9,0	4,0	8,0	0,0
Heterocephalus_glaber	9,16	3,2	0,1	5,0	5,0	3,0	5,0	0,0	4,0	6,0	0,0	8,2	0,0	7,0	0,0	3,18	5,1	2,1	4,0	5,1	0,0	3,0	7,2	4,0	0,0	7,0	7,0	0,0	3,0	4,0	4,0	5,0	2,0	2,0	6,5	8,0	6,1	0,0	5,0	6,1	3,0	0,0	5,0	8,0	0,1	6,0	3,0	7,0	0,0
Homo_sapiens	11,4	4,0	0,0	7,1	7,0	4,0	5,0	0,0	5,1	6,0	0,0	11,1	0,0	8,0	0,0	7,22	10,1	4,2	4,0	6,0	0,0	3,1	7,3	5,0	0,0	6,1	12,0	1,0	5,0	7,0	6,1	5,0	4,0	3,0	11,4	10,2	6,1	0,0	10,0	9,0	4,0	0,0	7,0	1,1	0,0	9,0	4,0	8,0	0,0
Jaculus_jaculus	13,2	3,0	0,0	4,4	6,2	3,1	7,1	0,0	4,1	5,0	0,1	11,0	0,1	9,0	0,0	5,24	8,1	3,3	7,1	6,0	0,0	3,1	7,5	3,3	0,0	5,0	5,2	0,0	3,0	5,0	3,0	4,0	3,0	2,0	9,4	7,3	4,0	0,0	6,2	7,2	3,0	0,0	5,0	1,1	0,0	6,2	3,0	7,0	0,0
Marmota_marmota	10,21	2,3	0,2	3,13	6,0	3,0	5,0	0,0	5,0	5,0	0,0	10,1	0,2	8,1	0,1	3,28	6,0	4,0	6,0	6,1	0,7	4,3	7,4	4,0	0,0	4,1	7,0	3,2	3,0	5,0	4,0	5,0	4,0	3,0	8,1	6,2	4,2	0,0	7,1	5,3	2,1	0,0	5,0	1,0	0,0	7,2	3,0	7,1	0,0
Macaca_mulatta	12,7	5,0	0,0	10,0	7,0	4,0	5,0	0,0	5,0	6,0	0,0	18,0	0,0	9,3	0,0	8,18	9,2	4,2	5,1	10,0	0,0	8,1	7,5	6,0	0,0	9,1	8,0	3,0	5,1	8,0	6,0	6,0	4,0	3,0	9,1	10,5	7,3	0,0	9,1	7,0	4,0	0,0	4,0	1,0	0,0	9,0	4,0	8,0	0,0
Microcebus_murinus	8,2	4,0	0,0	5,4	6,0	3,0	6,0	0,0	5,0	6,1	0,0	10,0	0,0	11,0	0,1	4,18	9,3	3,1	12,1	7,1	0,0	2,2	10,3	10,1	0,0	6,0	8,0	0,0	4,0	5,0	4,0	8,0	3,0	3,0	7,0	6,0	6,0	0,0	7,0	9,0	3,0	1,0	6,0	1,0	0,0	7,0	3,0	8,0	0,0
Mus_musculus	12,1	3,5	0,0	6,5	5,1	3,0	4,0	0,0	4,1	5,0	0,0	10,1	0,0	12,2	0,0	5,47	7,3	4,2	6,2	5,1	1,0	2,2	8,2	4,0	0,0	8,0	9,2	0,0	4,1	5,0	4,0	6,2	3,1	3,0	6,11	7,3	5,3	0,0	7,0	6,0	3,0	0,0	5,2	1,0	0,0	7,1	3,0	6,1	0,1
Microtus_ochrogaster	10,1	4,1	0,1	4,1	6,1	4,0	5,2	0,0	5,2	5,1	0,0	11,2	0,0	13,6	0,0	6,11	6,2	4,3	8,2	8,1	0,1	5,0	9,1	5,3	0,0	7,0	9,2	0,0	4,0	4,1	4,0	6,1	3,1	4,0	66,65	7,2	5,3	0,0	9,1	8,0	3,0	1,0	6,0	1,0	0,0	7,1	2,1	6,1	0,0
Mustela_putorius	14,1	5,0	0,0	5,3	6,0	4,0	6,6	0,0	6,0	6,0	0,1	10,2	0,0	7,0	0,0	11,14	6,4	4,0	5,5	6,1	0,0	2,0	8,1	4,0	1,0	6,1	10,0	0,0	5,0	6,0	6,0	4,0	3,1	4,0	8,29	10,1	7,1	0,0	10,1	9,0	2,0	0,0	4,1	1,0	0,0	6,0	4,0	7,2	0,0
Oryctolagus_cuniculus	17,2	4,0	0,0	4,5	7,0	3,1	6,0	0,0	5,0	6,0	0,0	23,1	1,0	13,1	0,0	8,15	14,0	5,0	13,0	15,3	0,0	5,6	11,1	8,0	0,0	9,0	10,3	0,1	7,0	5,0	3,0	9,0	3,0	4,0	16,15	9,4	5,3	0,0	10,3	9,0	4,0	0,0	5,0	1,0	0,0	10,0	4,1	8,0	0,0
Octodon_degus	10,1	3,1	0,0	5,1	5,0	3,0	4,0	0,0	4,1	5,0	0,0	11,0	0,0	8,0	0,0	7,23	5,3	2,2	4,0	5,1	0,0	3,0	5,7	6,1	0,0	6,0	8,0	0,0	4,0	4,0	4,0	4,0	3,0	2,0	10,1	7,4	6,0	0,0	6,1	7,0	3,0	0,0	4,0	1,0	0,0	7,1	3,0	8,0	0,0
Orcinus_orca	13,3	6,4	0,0	7,19	6,0	3,3	8,14	0,0	5,0	6,18	0,0	12,1	0,7	9,19	0,0	5,13	8,2	5,4	4,2	9,29	0,1	9,29	9,1	9,18	0,0	9,0	10,0	0,0	5,0	6,0	5,0	4,0	3,1	4,0	9,8	8,30	6,3	0,0	8,4	7,0	4,0	0,0	5,0	1,0	0,0	10,2	4,1	9,1	0,0
Pteropus_alecto	8,0	4,0	1,0	5,25	5,0	2,0	4,0	0,0	5,0	3,1	0,1	6,0	0,0	8,0	1,0	9,9	5,0	3,0	5,0	4,5	0,1	3,0	7,3	8,5	0,0	4,1	6,0	0,0	4,32	3,0	3,0	5,0	3,3	3,4	7,0	5,0	5,1	0,0	6,0	5,1	1,0	0,0	4,0	1,0	0,0	5,0	3,0	5,0	0,0
Pongo_abelii	14,5	4,0	0,0	9,0	7,0	4,0	5,0	0,0	6,0	6,0	1,0	22,0	0,0	7,0	0,0	7,20	10,1	5,1	5,0	10,1	0,0	4,1	6,2	6,1	0,0	11,1	11,0	3,0	6,0	8,0	5,0	4,0	4,1	3,0	12,2	11,3	6,1	0,0	7,1	8,0	4,0	0,0	7,0	1,1	0,0	9,1	4,0	8,0	0,0
Pan_troglodytes	12,12	5,0	0,0	8,0	7,0	4,0	4,0	1,0	6,0	6,0	1,0	14,0	0,0	8,0	0,0	8,18	10,2	4,1	5,0	7,1	0,0	7,2	6,2	5,0	0,0	6,1	10,1	1,0	5,0	7,0	6,0	4,0	3,0	3,0	11,4	11,2	10,0	0,0	10,1	9,0	4,0	0,0	7,0	1,1	2,0	9,0	4,0	8,0	0,0
Rattus_norvegicus	8,17	3,0	0,0	3,2	6,0	3,0	5,2	0,0	5,0	7,0	0,0	11,2	0,0	10,0	0,0	4,32	8,3	3,2	6,1	7,3	0,0	5,0	7,2	4,1	0,0	8,0	7,1	0,0	3,0	5,1	3,0	6,1	2,0	3,0	8,1	5,1	3,2	0,0	7,1	8,14	3,0	0,0	6,0	1,0	0,0	6,2	3,0	3,2	0,0
Sus_scrofa	9,2	2,1	0,0	4,3	6,2	2,0	7,0	0,0	5,1	6,0	0,1	9,0	0,2	10,6	0,1	7,13	7,1	5,1	3,0	7,31	0,0	3,0	7,3	4,2	0,0	7,0	11,0	0,0	5,0	5,0	4,1	4,0	3,2	4,0	14,0	9,8	3,4	0,0	5,3	8,0	4,0	0,0	6,0	1,0	0,0	10,0	4,0	9,0	0,0
[truncated: 20 more columns]
