# Supplementary material for: Predicting transfer RNA gene activity from sequence and genome context
Source: HighWire-hosted journal article supplement (doi:10.1101/gr.256164.119), 2019-12-19
Supplement: Supplemental_Table_S11.xlsx [file Supplemental_Table_S11.xlsx]

## Sheet: S11
Supplemental Table S11: Distributions of tRNA genes by anticodon by species are shown, including those in segmental duplications and genes for which epigenomic data was not available. As in Supplemental Table S10, the number preceding the comma in each cell refers to the number of predicted active tRNA genes of that type, and the number following the comma refers to the number of predicted inacti…
species	AlaAGC	AlaCGC	AlaGGC	AlaTGC	ArgACG	ArgCCG	ArgCCT	ArgGCG	ArgTCG	ArgTCT	AsnATT	AsnGTT	AspATC	AspGTC	CysACA	CysGCA	GlnCTG	GlnTTG	GluCTC	GluTTC	GlyACC	GlyCCC	GlyGCC	GlyTCC	HisATG	HisGTG	IleAAT	IleGAT	IleTAT	LeuAAG	LeuCAA	LeuCAG	LeuTAA	LeuTAG	LysCTT	LysTTT	MetCAT	PheAAA	PheGAA	ProAGG	ProCGG	ProGGG	ProTGG	SeCTCA	SerACT	SerAGA	SerCGA	SerGCT	SerGGA
Aotus_nancymaae	10,4	4,0	0,0	7,1	6,0	4,0	4,0	0,0	4,0	5,0	0,0	15,2	0,0	8,0	0,0	5,14	8,1	4,0	6,0	8,2	0,0	2,1	5,3	5,0	0,0	7,1	8,1	0,0	5,0	6,0	5,0	5,0	2,0	3,0	7,5	9,2	6,0	0,0	8,2	11,1	4,0	0,0	6,0	1,0	0,0	9,0	3,0	8,0	0,0
Bos_taurus	15,14	5,4	0,0	7,11	9,0	5,5	7,29	0,0	5,4	6,5	0,0	27,1	0,2	11,10	0,1	6,33	13,11	6,9	5,3	16,23	0,0	8,31	11,3	7,8	0,0	15,0	15,2	0,0	5,2	8,1	5,3	5,0	5,1	4,0	18,10	10,28	7,9	0,1	14,8	11,1	4,0	0,0	8,0	1,0	0,1	11,1	4,1	15,2	2,13
Chrysochloris_asiatica	9,2	4,1	0,0	5,2	7,0	2,0	5,0	0,0	5,0	4,3	0,0	11,1	0,0	7,0	0,2	5,24	8,2	3,3	6,1	6,2	0,0	4,3	5,5	6,5	0,0	7,0	11,0	0,1	4,0	5,1	4,0	4,0	2,0	3,1	10,5	10,5	6,2	0,1	6,2	8,0	3,0	0,0	4,2	2,1	0,0	8,0	5,0	10,4	0,0
Canis_lupus_familiaris	10,3	4,0	0,0	5,6	4,2	3,0	7,5	0,0	4,0	5,2	0,0	14,0	0,1	11,0	0,0	6,13	8,1	3,2	7,5	9,1	0,0	5,1	11,0	8,2	0,0	8,0	7,1	0,0	5,0	4,0	4,0	6,0	3,0	4,0	10,28	8,2	5,4	0,0	9,1	7,1	4,0	0,0	5,0	1,0	0,0	9,1	4,0	8,0	0,0
Capra_hircus	2,10	1,2	0,1	3,10	2,0	1,1	4,15	0,0	2,2	5,7	1,1	21,1	0,0	9,4	0,2	4,34	9,5	2,3	6,5	15,23	0,0	6,31	10,1	7,13	0,0	12,1	3,2	0,1	2,0	4,0	1,1	6,0	2,0	3,0	5,9	6,15	2,5	0,0	5,7	5,1	2,0	0,0	3,0	1,0	0,0	3,3	2,0	4,5	1,26
Chinchilla_lanigera	8,10	2,1	0,2	5,5	7,0	3,0	5,0	0,0	5,0	5,0	0,0	7,1	0,0	7,1	0,0	19,6	6,0	3,1	3,2	4,0	0,0	2,1	7,3	4,2	0,0	5,0	8,1	0,0	4,0	4,0	4,0	4,0	3,0	2,0	9,0	7,4	3,0	1,0	8,0	8,0	4,0	0,0	4,0	0,0	0,0	7,0	4,0	7,1	0,0
Cavia_porcellus	14,5	4,1	0,0	6,4	7,0	3,0	5,0	0,0	4,0	5,0	0,0	14,1	0,0	9,0	0,0	4,30	7,3	2,2	5,0	6,0	0,0	2,3	6,5	5,1	0,0	6,1	9,0	0,0	4,1	5,0	5,0	6,0	3,0	3,0	12,2	8,3	5,2	0,0	7,1	8,0	3,0	0,0	4,0	1,0	0,0	8,0	4,0	8,2	0,0
Dasypus_novemcinctus	20,1	5,3	0,0	8,12	9,0	3,1	4,8	0,0	8,0	6,1	0,0	21,1	0,0	13,6	0,0	7,14	8,1	5,0	10,13	14,5	0,0	4,36	11,2	8,0	0,0	8,1	10,0	0,0	5,1	5,0	6,0	8,0	4,1	3,0	32,5	11,5	10,1	0,0	11,0	6,0	4,0	0,0	7,0	1,0	0,0	10,0	4,1	10,0	0,0
Equus_caballus	19,5	5,3	0,0	6,4	10,0	4,0	7,0	0,0	4,0	5,0	0,0	12,1	0,0	7,1	0,0	5,17	10,0	5,0	4,5	10,0	0,0	7,1	8,2	4,0	0,0	10,1	17,0	0,0	5,0	7,0	6,0	3,0	4,0	3,2	14,1	9,5	8,4	0,0	11,1	10,0	3,0	0,0	7,0	1,0	0,0	12,0	4,0	10,1	0,0
Erinaceus_europaeus	10,4	4,0	0,0	4,4	6,0	2,1	6,1	0,0	4,0	4,1	0,0	7,0	0,0	13,0	0,0	6,25	3,5	1,3	7,2	8,0	0,0	5,0	9,5	6,3	0,0	5,0	7,1	0,0	4,0	6,0	5,0	5,1	0,1	2,1	94,29	6,4	5,2	0,0	6,2	8,2	3,0	0,0	4,0	1,0	0,0	7,1	3,0	7,0	0,0
Eptesicus_fuscus	8,0	3,0	0,0	3,0	5,0	2,0	4,0	0,0	4,0	4,0	0,0	9,0	0,0	6,0	0,1	5,12	5,1	3,0	5,0	3,0	0,0	4,0	9,0	5,0	0,0	5,0	7,1	0,0	3,0	3,0	3,0	3,0	2,0	2,0	7,0	5,0	4,0	0,0	4,0	6,0	2,0	0,0	4,0	1,0	0,0	5,0	2,0	5,0	0,0
Gorilla_gorilla	15,6	4,0	1,0	8,0	7,0	4,0	6,0	0,0	6,0	6,0	0,1	17,1	0,0	9,0	0,0	7,18	9,4	3,2	5,0	8,0	0,0	6,1	4,1	3,0	0,0	8,1	11,1	0,0	5,0	9,1	5,0	4,0	4,0	3,0	11,2	11,2	9,0	0,0	8,0	7,0	4,0	0,0	6,0	1,1	0,0	9,0	4,0	8,0	0,0
Heterocephalus_glaber	9,16	3,2	0,1	5,0	5,0	3,0	5,0	0,0	4,0	6,0	0,0	8,2	0,0	7,0	0,0	3,18	5,1	2,1	4,0	5,1	0,0	3,0	7,2	4,0	0,0	7,0	7,0	0,0	3,0	4,0	4,0	5,0	2,0	2,0	6,5	8,0	6,1	0,0	5,0	6,1	3,0	0,0	5,0	8,0	0,1	6,0	3,0	7,0	0,0
Homo_sapiens	14,12	4,0	0,0	8,0	7,0	4,0	5,0	0,0	5,1	6,0	0,0	24,0	0,0	13,0	0,0	6,23	10,3	4,2	8,0	7,0	0,0	4,1	10,4	9,0	0,0	8,1	14,1	3,0	5,0	9,0	6,1	9,0	4,0	3,0	10,5	10,2	10,1	0,0	9,1	9,0	4,0	0,0	7,0	1,1	0,0	9,0	4,0	8,0	0,0
Jaculus_jaculus	13,2	3,0	0,0	4,4	6,2	3,1	7,1	0,0	4,1	5,0	0,1	11,0	0,1	9,0	0,0	5,24	8,1	3,3	7,1	6,0	0,0	3,1	7,5	3,3	0,0	5,0	5,2	0,0	3,0	5,0	3,0	4,0	3,0	2,0	9,4	7,3	4,0	0,0	6,2	7,2	3,0	0,0	5,0	1,1	0,0	6,2	3,0	7,0	0,0
Marmota_marmota	10,21	2,3	0,2	3,13	6,0	3,0	5,0	0,0	5,0	5,0	0,0	10,1	0,2	8,1	0,1	3,30	6,0	4,0	6,0	6,1	0,7	4,3	7,4	4,0	0,0	4,1	7,0	3,2	3,0	5,0	4,0	5,0	4,0	3,0	8,1	6,2	4,2	0,0	7,1	5,3	2,1	0,0	5,0	1,0	0,0	9,4	3,0	7,1	0,0
Macaca_mulatta	12,7	5,0	0,0	10,0	7,0	4,0	5,0	0,0	5,0	6,0	0,0	18,0	0,0	9,3	0,0	8,18	9,2	4,2	5,1	10,0	0,0	8,1	7,5	6,0	0,0	9,1	8,0	3,0	5,1	10,0	6,0	6,0	4,0	3,0	9,1	10,5	7,3	0,0	9,1	7,0	4,0	0,0	4,0	1,0	0,0	9,0	4,0	8,0	0,0
Microcebus_murinus	10,2	4,0	0,0	5,4	6,0	3,0	6,0	0,0	5,0	6,1	0,0	10,0	0,0	11,0	0,1	4,18	9,3	3,1	12,1	7,1	0,0	2,2	10,3	10,1	0,0	6,0	8,0	0,0	4,0	5,0	4,0	8,0	3,0	3,0	7,0	8,0	6,0	0,0	7,0	9,0	3,0	1,0	6,0	1,0	0,0	7,0	3,0	8,0	0,0
Mus_musculus	12,1	3,7	0,0	6,5	5,1	3,0	4,0	0,0	4,1	5,0	0,0	12,1	0,0	14,2	0,0	5,49	7,3	4,2	9,2	7,1	1,0	4,2	11,2	7,0	0,0	10,0	9,2	0,0	4,1	5,0	4,0	8,2	3,1	3,0	8,11	7,3	5,3	0,0	7,0	6,0	3,0	0,0	5,2	1,0	0,0	7,1	3,0	6,1	0,1
Microtus_ochrogaster	12,1	4,1	0,1	4,1	6,1	4,0	5,2	0,0	5,2	5,1	0,0	11,2	0,0	13,6	0,0	6,11	6,2	4,3	8,2	8,1	0,1	5,0	9,1	5,3	0,0	7,0	9,2	0,0	4,0	4,1	4,0	6,1	3,1	4,0	66,65	7,2	5,3	0,0	9,1	8,0	3,0	1,0	6,0	1,0	0,0	7,1	2,1	6,1	0,0
Mustela_putorius	14,1	5,0	0,0	5,3	6,0	4,0	6,6	0,0	6,0	6,0	0,1	10,2	0,0	7,0	0,0	11,14	6,4	4,0	5,5	6,1	0,0	2,0	8,1	4,0	1,0	6,1	10,0	0,0	5,0	6,0	6,0	4,0	3,1	4,0	8,29	10,1	7,1	0,0	10,1	9,0	2,0	0,0	4,1	1,0	0,0	8,0	4,0	9,2	0,0
Oryctolagus_cuniculus	17,2	4,0	0,0	4,5	7,0	3,1	6,0	0,0	5,0	6,0	0,0	23,1	1,0	19,1	0,0	8,15	14,0	5,0	17,0	15,3	0,0	7,8	19,1	14,0	0,0	9,0	10,3	0,1	7,0	5,0	3,0	15,0	3,0	4,0	16,15	9,4	5,3	0,0	10,3	9,0	4,0	0,0	5,0	1,0	0,0	10,0	4,1	10,0	0,0
Octodon_degus	10,1	3,1	0,0	5,1	5,0	3,0	4,0	0,0	4,1	5,0	0,0	11,0	0,0	8,0	0,0	7,23	5,3	2,2	4,0	5,1	0,0	3,0	5,7	6,1	0,0	6,0	8,0	0,0	4,0	4,0	4,0	4,0	3,0	2,0	10,1	7,4	6,0	0,0	6,1	7,0	3,0	0,0	4,0	1,0	0,0	7,1	3,0	8,0	0,0
Orcinus_orca	13,3	6,4	0,0	7,19	8,0	3,3	8,14	0,0	5,0	6,18	0,0	14,1	0,7	9,19	0,0	5,13	10,2	5,4	4,2	9,29	0,1	9,29	9,1	9,18	0,0	9,0	10,0	0,0	5,0	6,0	5,0	4,0	3,1	4,0	9,8	8,30	6,3	0,0	8,4	7,0	4,0	0,0	5,0	1,0	0,0	10,2	4,1	9,1	0,0
Pteropus_alecto	8,0	4,0	1,0	5,25	5,0	2,0	4,0	0,0	5,0	3,1	0,1	6,0	0,0	8,0	1,0	9,9	5,0	3,0	5,0	4,5	0,1	3,0	7,3	8,5	0,0	4,1	6,0	0,0	4,32	3,0	3,0	5,0	3,3	3,4	7,0	5,0	5,1	0,0	6,0	5,1	1,0	0,0	4,0	1,0	0,0	5,0	3,0	5,0	0,0
Pongo_abelii	16,5	4,0	0,0	9,0	7,0	4,0	5,0	0,0	6,0	6,0	1,0	22,0	0,0	9,0	0,0	7,20	10,1	5,1	5,0	13,1	0,0	6,1	6,2	6,1	0,0	11,1	13,0	3,0	6,0	8,0	5,0	6,0	4,1	3,0	12,2	11,3	9,1	0,0	7,1	8,0	4,0	0,0	7,0	1,1	0,0	9,1	4,0	8,0	0,0
Pan_troglodytes	12,12	5,0	0,0	8,0	7,0	4,0	4,0	1,0	6,0	6,0	1,0	18,0	0,0	8,0	0,0	8,18	10,2	4,1	5,0	7,1	0,0	7,2	6,2	5,0	0,0	8,1	10,1	1,0	5,0	9,0	6,0	4,0	3,0	3,0	11,4	11,4	10,0	0,0	10,1	9,0	4,0	0,0	7,0	1,1	2,0	9,0	4,0	8,0	0,0
Rattus_norvegicus	12,19	3,0	0,0	3,4	6,0	3,0	5,2	0,0	5,0	7,0	0,0	11,2	0,0	12,2	0,0	4,34	8,3	3,2	8,1	7,3	0,0	5,0	9,2	8,1	0,0	10,0	7,1	0,0	3,0	5,1	3,0	8,1	2,0	3,0	10,1	5,1	3,2	0,0	7,1	8,14	3,0	0,0	6,0	1,0	0,0	8,2	3,0	9,2	0,0
Sus_scrofa	9,2	2,1	0,0	4,3	6,2	2,0	7,0	0,0	5,1	6,0	0,1	9,0	0,2	15,6	0,1	7,13	7,1	5,1	10,0	7,31	0,0	3,0	16,3	11,2	0,0	7,0	13,0	0,0	5,0	5,0	4,1	11,0	3,2	4,0	14,0	9,8	3,4	0,0	5,3	8,0	4,0	0,0	6,0	1,0	0,0	10,0	4,0	9,0	0,0
[truncated: 20 more columns]
