# Supplementary material for: Predicting transfer RNA gene activity from sequence and genome context
Source: HighWire-hosted journal article supplement (doi:10.1101/gr.256164.119), 2019-12-19
Supplement: Supplemental_Table_S13.xlsx [file Supplemental_Table_S13.xlsx]

## Sheet: S13
Supplemental Table S13: Results of Mann-Whitney U tests to compare the number of exons within different threshold distances for active and inactive human tRNA genes based on our epigenomic data (Roadmap Epigenomics Consortium et al. 2015; Thornlow et al. 2018). Our results show that 75 kb was the distance threshold where the p-value was smallest.
Threshold Distance (nucleotides)	Mann-Whitney U P-Value
1000	1.2e-12
5000	4.3e-12
10000	4.2e-14
40000	1.1e-20
50000	5.4e-23
75000	2e-25
100000	1.7e-23
200000	1.4e-21
400000	4.7e-19
500000	1.9e-17
750000	3.2e-20
1000000	2.3e-21
